# Supplementary material for: Identification of a Resistance Exercise-Specific Signaling Pathway that Drives Skeletal Muscle Growth
Source: Research Square preprint supplement (doi:10.21203/rs.3.rs-4997138/v1), 2024-11-12
Supplement: Supplementary file 1 [file 507ca5b293b3892c8db9678f.xlsx]

## Sheet: Supplementary Table 2
Fasta header	Uniprot	Gene Name		log2 Pre Subject A	log2 0 hr End Subject A	log2 0 hr RE Subject A	log2 3 hr End Subject A	log2 3 hr RE Subject A	log2 Pre Subject B	log2 0 hr End Subject B	log2 0 hr RE Subject B	log2 3 hr End Subject B	log2 3 hr RE Subject B	log2 Pre Subject C	log2 0 hr End Subject C	log2 0 hr RE Subject C	log2 3 hr End Subject C	log2 3 hr RE Subject C	log2 Pre Subject D	log2 0 hr End Subject D	log2 0 hr RE Subject D	log2 3 hr End Subject D	log2 3 hr RE Subject D		log2 Pre Avg		log2 0 hr END Avg	-log10 adj.P.Val 0 hr END vs. Pre		log2 0 hr RE Avg	-log10 adj.P.Val 0 hr RE vs. Pre		log2 3 hr END Avg	-log10 adj.P.Val 3 hr END vs. Pre		log2 3 hr RE Avg	-log10 adj.P.Val 3 hr RE vs. Pre
P48506|GSH1_HUMAN Glutamate--cysteine ligase catalytic subunit OS=Homo sapiens OX=9606 GN=GCLC PE=1 SV=2	P48506	GCLC		0	0.635525	0.24495	0.349842	0.0238457	0	0.53122	0.152289	0.325644	0.0469605	0	0.47707	-0.114817	0.167976	-0.381532	0	0.716554	-0.306204	0.389503	-0.36142		0		0.590092	1.52057		-0.00594524	0.00506193		0.308241	0.605203		-0.168036	0.324331
P01780|HV307_HUMAN Immunoglobulin heavy variable 3-7 OS=Homo sapiens OX=9606 GN=IGHV3-7 PE=1 SV=2	P01780	IGHV3-7		0	0.436374	0.540524	0.368647	0.625866	0	0.827211	0.159559	0.387249	-0.440224	0	1.04945	1.08982	-1.24903	0.574229	0	0.707144	-0.00635246	0.713656	-0.45519		0		0.755045	0.855547		0.445888	0.249679		0.0551312	0.00058492		0.0761701	0.0370167
P02790|HEMO_HUMAN Hemopexin OS=Homo sapiens OX=9606 GN=HPX PE=1 SV=2	P02790	HPX		0	0.314751	0.381886	0.288509	0.607053	0	0.634651	0.139998	0.358244	-0.130297	0	0.427123	0.487507	0.218043	0.248052	0	0.491026	-0.135618	-0.0423594	-0.3043		0		0.466888	0.855547		0.218443	0.239714		0.205609	0.0868876		0.105127	0.0899226
P00491|PNPH_HUMAN Purine nucleoside phosphorylase OS=Homo sapiens OX=9606 GN=PNP PE=1 SV=2	P00491	PNP		0	0.611048	0.680101	0.23339	0.0562129	0	1.39198	0.331472	0.704526	-0.113142	0	0.937343	0.628958	0.632652	-0.174919	0	0.951415	-0.650797	0.687577	-0.801468		0		0.972945	0.855547		0.247433	0.114465		0.564536	0.605203		-0.258329	0.319251
P19823|ITIH2_HUMAN Inter-alpha-trypsin inhibitor heavy chain H2 OS=Homo sapiens OX=9606 GN=ITIH2 PE=1 SV=2	P19823	ITIH2		0	0.297119	0.623087	-0.0543649	0.662655	0	0.786042	0.289529	0.438814	0.0264404	0	0.767412	0.937264	0.459497	0.453563	0	0.768054	0.0826124	0.708806	-0.249605		0		0.654657	0.834633		0.483123	0.435741		0.388188	0.136472		0.223264	0.245319
P06702|S10A9_HUMAN Protein S100-A9 OS=Homo sapiens OX=9606 GN=S100A9 PE=1 SV=1	P06702	S100A9		0	0.751954	1.02752	0.495185	0.883767	0	2.01882	0.401019	0.30741	0.0101078	0	1.2835	2.20322	1.44798	0.594405	0	1.71481	-0.0173261	2.89215	0.344789		0		1.44227	0.834633		0.903609	0.253163		1.28568	0.112029		0.458267	0.599927
Q8TB37|NUBPL_HUMAN Iron-sulfur protein NUBPL OS=Homo sapiens OX=9606 GN=NUBPL PE=1 SV=3	Q8TB37	NUBPL		0	0.274163	0.0353366	0.185964	0.168574	0	0.208672	0.233176	0.0196188	0.144979	0	0.283521	0.155868	0.256151	0.178183	0	0.350846	-0.012983	0.0504691	0.141246		0		0.279301	0.834633		0.10285	0.243011		0.128051	0.00795531		0.158246	0.945128
D6RF35|D6RF35_HUMAN Vitamin D-binding protein OS=Homo sapiens OX=9606 GN=GC PE=1 SV=1	D6RF35	GC		0	0.266367	0.644565	0.182473	0.738634	0	0.739951	0.276775	0.359268	-0.00239848	0	0.692401	1.11529	0.310937	0.48421	0	0.486998	0.265222	0.430074	-0.379158		0		0.546429	0.829783		0.575463	0.498969		0.320688	0.605203		0.210322	0.179647
Q8IYB8|SUV3_HUMAN ATP-dependent RNA helicase SUPV3L1;mitochondrial OS=Homo sapiens OX=9606 GN=SUPV3L1 PE=1 SV=1	Q8IYB8	SUPV3L1		0	0.243351	0.189556	0.251679	0.383364	0	0.27989	0.107494	0.133301	0.0154557	0	0.181565	0.37391	0.0202336	0.200562	0	0.340998	0.0813648	0.470892	0.089508		0		0.261451	0.829783		0.188081	0.440631		0.219027	0.0868876		0.172222	0.485088
A0A286YEY4|A0A286YEY4_HUMAN Immunoglobulin heavy constant gamma 2 (Fragment) OS=Homo sapiens OX=9606 GN=IGHG2 PE=1 SV=1	A0A286YEY4	IGHG2		0	0.300938	0.460498	0.231278	0.0604048	0	0.642587	0.173581	0.275587	-0.319803	0	0.651867	0.584307	0.378217	0.123308	0	0.944693	0.0306246	0.553919	-0.286412		0		0.635021	0.829783		0.312253	0.409241		0.35975	0.515471		-0.105626	0.191311
O60240|PLIN1_HUMAN Perilipin-1 OS=Homo sapiens OX=9606 GN=PLIN1 PE=1 SV=2	O60240	PLIN1		0	0.469528	0.232014	0.806226	1.68055	0	0.288498	0.817858	0.112534	0.0817039	0	0.280806	-0.0735076	0.0220406	0.0248862	0	0.606148	0.272224	0.619721	0.0785123		0		0.411245	0.829783		0.312147	0.24524		0.39013	0.0868876		0.466413	0.265369
O14558|HSPB6_HUMAN Heat shock protein beta-6 OS=Homo sapiens OX=9606 GN=HSPB6 PE=1 SV=2	O14558	HSPB6		0	0.368862	0.701104	0.226664	0.765413	0	0.209239	-0.0766482	-0.34488	-0.138294	0	0.284668	0.310674	-0.0859889	0.218628	0	0.451876	0.149651	0.210423	0.304928		0		0.328661	0.829783		0.271195	0.245136		0.00155452	0.0001404		0.287669	0.367452
P48507|GSH0_HUMAN Glutamate--cysteine ligase regulatory subunit OS=Homo sapiens OX=9606 GN=GCLM PE=1 SV=1	P48507	GCLM		0	0.65065	0.421037	0.31495	-0.108101	0	0.20959	0.0230072	-0.0911311	0.0584326	0	0.52544	-0.0154598	0.277344	-0.354963	0	0.572455	0.207967	0.385922	-0.0134893		0		0.489534	0.829783		0.159138	0.238742		0.221771	0.0495718		-0.10453	0.25
Q8NBV4|PLPP7_HUMAN Inactive phospholipid phosphatase 7 OS=Homo sapiens OX=9606 GN=PLPP7 PE=2 SV=1	Q8NBV4	PLPP7		0	0.30462	0.261669	0.0476565	0.0361206	0	0.21462	-0.155535	0.245367	-0.220192	0	0.24947	0.283973	0.223938	0.32253	0	0.425809	0.225993	0.439602	0.383364		0		0.29863	0.829783		0.154025	0.222568		0.239141	0.154402		0.130456	0.199512
Q96B97|SH3K1_HUMAN SH3 domain-containing kinase-binding protein 1 OS=Homo sapiens OX=9606 GN=SH3KBP1 PE=1 SV=2	Q96B97	SH3KBP1		0	0.210277	0.329113	0.0965869	0.160014	0	0.487624	0.0306976	0.180454	-0.124164	0	0.329699	0.0973729	0.194646	0.33408	0	0.316631	-0.206769	0.115767	-0.305243		0		0.336058	0.829783		0.0626036	0.073021		0.146864	0.154402		0.0161715	0.0152646
O75339|CILP1_HUMAN Cartilage intermediate layer protein 1 OS=Homo sapiens OX=9606 GN=CILP PE=1 SV=4	O75339	CILP		0	-0.452928	-0.228406	-0.304578	-0.222261	0					0	-0.450034	-0.138888	-0.0708625	-0.182994							0		-0.451481	0.774087		-0.183647	0.442772		-0.18772	0.00360751		-0.202627	0.707884
P08697|A2AP_HUMAN Alpha-2-antiplasmin OS=Homo sapiens OX=9606 GN=SERPINF2 PE=1 SV=3	P08697	SERPINF2		0	0.213669	0.490859	0.152276	0.419703	0	0.77436	0.564325	0.524802	-0.00778286	0	0.54718	0.616818	0.267495	0.142021	0	0.539164	0.252657	0.444211	-0.27817		0		0.518593	0.766628		0.481165	1.31329		0.347196	0.309774		0.0689428	0.0782608
P07305|H10_HUMAN Histone H1.0 OS=Homo sapiens OX=9606 GN=H1F0 PE=1 SV=3	P07305	H1F0		0	-0.536994	-0.0518581	-0.0508334	0.0203339	0	-0.161354	-0.204659	-0.232686	-0.238971	0	-0.562818	-0.0319992	-0.55274	0.100322	0	-0.566091	-0.059551	-0.154735	0.210423		0		-0.456814	0.766628		-0.0870169	0.248205		-0.247749	0.0868876		0.0230269	0.0322231
A0A2R8Y5P7|A0A2R8Y5P7_HUMAN Probable histidine--tRNA ligase;mitochondrial OS=Homo sapiens OX=9606 GN=HARS2 PE=1 SV=1	A0A2R8Y5P7	HARS2		0	0.246743	0.112737	0.16444	0.105124	0	0.310255	0.143388	0.285822	0.206356	0	0.145516	-0.0445842	0.180429	0.160605	0	0.320697	0.111308	0.223184	0.42191		0		0.255803	0.766628		0.080712	0.238742		0.213469	0.309774		0.223499	0.707884
P26373|RL13_HUMAN 60S ribosomal protein L13 OS=Homo sapiens OX=9606 GN=RPL13 PE=1 SV=4	P26373	RPL13		0	-0.253008	-0.0610196	-0.109541	-0.0663411	0	-0.192464	-0.093483	-0.256986	0.076608	0	-0.292688	-0.372299	-0.128306	0.077226	0	-0.177063	0.116976	-0.0573471	0.107303		0		-0.228806	0.766628		-0.102456	0.148548		-0.138045	0.0868876		0.048699	0.207944
P26440|IVD_HUMAN Isovaleryl-CoA dehydrogenase;mitochondrial OS=Homo sapiens OX=9606 GN=IVD PE=1 SV=2	P26440	IVD		0	0.236221	0.0819955	0.223287	0.108302	0	0.280545	-0.0349889	-0.21241	0.18575	0	0.164246	-0.034651	0.105614	0.0531655	0	0.198831	0.10013	0.0875472	0.234266		0		0.219961	0.766628		0.0281213	0.0787723		0.0510095	0.00058492		0.145371	0.673108
P42766|RL35_HUMAN 60S ribosomal protein L35 OS=Homo sapiens OX=9606 GN=RPL35 PE=1 SV=2	P42766	RPL35		0	-0.336442	0.00128344	-0.16857	-0.0468393	0	-0.986683	-0.0920369	-0.272842	0.273777	0	-0.641294	-0.101782	-0.678428	-0.0899559	0	-0.483767	0.13844	-1.13208	-0.0148232		0		-0.612047	0.766628		-0.0135237	0.0284107		-0.562979	0.154402		0.0305396	0.0563633
P11171|41_HUMAN Protein 4.1 OS=Homo sapiens OX=9606 GN=EPB41 PE=1 SV=4	P11171	EPB41		0	0.205051	0.95468	0.0674076	0.417348	0	0.86864	0.258312	0.479412	-0.0847562	0	0.928939	1.24495	0.587166	0.346946	0	0.815793	-0.549111	0.477608	-0.541479		0		0.704606	0.731949		0.477209	0.185177		0.402899	0.243911		0.0345145	0.0206311
Q7L0Y3|TM10C_HUMAN tRNA methyltransferase 10 homolog C OS=Homo sapiens OX=9606 GN=TRMT10C PE=1 SV=2	Q7L0Y3	TRMT10C		0	0.197511	0.19556	0.141097	0.0781747	0	0.162991	0.0313675	0.0867628	0.119134	0	0.235865	0.137952	0.154655	0.184625	0	0.190789	-0.125945	0.160814	0.175732		0		0.196789	0.731949		0.0597334	0.108166		0.135832	0.136472		0.139417	0.79811
Q32MZ4|LRRF1_HUMAN Leucine-rich repeat flightless-interacting protein 1 OS=Homo sapiens OX=9606 GN=LRRFIP1 PE=1 SV=2	Q32MZ4	LRRFIP1		0	-0.413458	-0.0986371	0.0654101	-0.083548	0					0	-0.396634	0.0843813	-0.0833495	-0.00606607							0		-0.405046	0.731949		-0.0071279	0.0115598		-0.00896971	0.00058492		-0.044807	0.145025
A0A0C4DGB6|A0A0C4DGB6_HUMAN Serum albumin OS=Homo sapiens OX=9606 GN=ALB PE=1 SV=1	A0A0C4DGB6	ALB		0	0.277743	0.596924	0.289475	1.01181	0	0.641247	0.184505	0.398705	0.0642987	0	0.251049	0.471882	-0.168926	-0.051349	0	0.395039	0.282519	0.393385	-0.380334		0		0.39127	0.694387		0.383958	0.846169		0.22816	0.00473085		0.161107	0.0960891
P30049|ATPD_HUMAN ATP synthase subunit delta;mitochondrial OS=Homo sapiens OX=9606 GN=ATP5F1D PE=1 SV=2	P30049	ATP5F1D		0	0.291859	0.0570248	0.305513	0.23382	0	0.286658	0.00345811	-0.266167	-0.0222888	0	0.120494	-0.257546	0.017621	-0.0908297	0	0.343253	-0.0689647	0.23782	-0.211406		0		0.260566	0.694387		-0.066507	0.13622		0.0736969	0.00058492		-0.0226762	0.0322231
Q6P1L8|RM14_HUMAN 39S ribosomal protein L14;mitochondrial OS=Homo sapiens OX=9606 GN=MRPL14 PE=1 SV=1	Q6P1L8	MRPL14		0	0.189484	0.0760728	0.0210449	-0.0305472	0	0.324181	-0.0372359	0.2715	0.0949363	0	0.164995	0.0716793	0.0723847	0.0866856	0	0.36043	0.0280326	0.208447	-0.0766862		0		0.259773	0.694387		0.0346372	0.12589		0.143344	0.040084		0.0185971	0.0563633
C9K0S6|C9K0S6_HUMAN Tubulin alpha-8 chain (Fragment) OS=Homo sapiens OX=9606 GN=TUBA8 PE=1 SV=1	C9K0S6	TUBA8							0	1.13184	0.0831588	0.151198	-0.0607292						0	0.815529	-0.204368	1.52246	0.0632436		0		0.973685	0.694387		-0.0606044	0.0586173		0.836827	0.00058492		0.00125718	0.00219865
Q5S007|LRRK2_HUMAN Leucine-rich repeat serine/threonine-protein kinase 2 OS=Homo sapiens OX=9606 GN=LRRK2 PE=1 SV=2	Q5S007	LRRK2		0	-0.398306	-0.5336	-0.766824	-0.302752	0					0	-0.357453	-0.552476	-0.0470453	-0.260811							0		-0.377879	0.69155		-0.543038	1.41436		-0.406934	0.00360751		-0.281781	0.8824
Q330K2|NDUF6_HUMAN NADH dehydrogenase (ubiquinone) complex I;assembly factor 6 OS=Homo sapiens OX=9606 GN=NDUFAF6 PE=1 SV=2	Q330K2	NDUFAF6		0	0.137269	0.337369	-0.0414695	0.10216	0	0.211082	0.318396	0.0179398	0.178477	0	0.298358	0.283153	0.147739	0.0403058	0	0.211541	0.040578	-0.0259845	0.292772		0		0.214562	0.69155		0.244874	0.592832		0.0245562	0.00058492		0.153429	0.597864
Q9NVA1|UQCC1_HUMAN Ubiquinol-cytochrome-c reductase complex assembly factor 1 OS=Homo sapiens OX=9606 GN=UQCC1 PE=1 SV=3	Q9NVA1	UQCC1		0	0.153685	0.324734	0.108028	0.186738	0	0.371736	-0.00767417	0.224751	-0.0406435	0	0.335622	0.24104	0.205139	0.292758	0	0.196824	0.0116047	0.346085	0.11961		0		0.264467	0.69155		0.142426	0.24352		0.221	0.207614		0.139616	0.434481
P06132|DCUP_HUMAN Uroporphyrinogen decarboxylase OS=Homo sapiens OX=9606 GN=UROD PE=1 SV=2	P06132	UROD		0	0.115607	0.409389	0.0523869	0.122244	0	0.463597	0.195477	0.23634	0.168987	0	0.431894	0.430963	0.249472	0.153158	0	0.504638	-0.271453	0.213952	-0.32179		0		0.378934	0.69155		0.191094	0.181502		0.188038	0.159453		0.03065	0.0370167
P83731|RL24_HUMAN 60S ribosomal protein L24 OS=Homo sapiens OX=9606 GN=RPL24 PE=1 SV=1	P83731	RPL24		0	-0.428397	0.0499263	-0.00876867	0.202962	0	-0.664055	0.0722275	-0.163622	0.274237	0	-0.50267	-0.322327	-0.572824	-0.0699618	0	-0.160711	0.0725018	-0.735188	0.151351		0		-0.438958	0.69155		-0.0319178	0.0424449		-0.370101	0.0928673		0.139647	0.416698
Q9NRN7|ADPPT_HUMAN L-aminoadipate-semialdehyde dehydrogenase-phosphopantetheinyl transferase OS=Homo sapiens OX=9606 GN=AASDHPPT PE=1 SV=2	Q9NRN7	AASDHPPT		0	0.195526	0.103252	0.214828	0.0504128	0	0.230561	0.196547	0.00878472	0.276825	0	0.128489	0.144248	0.11326	0.15202	0	0.280816	0.227742	0.177504	0.261678		0		0.208848	0.683087		0.167948	0.874707		0.128594	0.040084		0.185234	0.707884
A6PVN5|A6PVN5_HUMAN Serine/threonine-protein phosphatase 2A activator OS=Homo sapiens OX=9606 GN=PTPA PE=1 SV=1	A6PVN5	PTPA		0	0.166219	0.262891	0.0797116	0.0416113	0	0.157247	0.130909	-0.0113352	0.176533	0	0.306869	0.299399	0.132666	0.173879	0	0.340472	0.0521704	0.195479	0.111055		0		0.242702	0.683087		0.186342	0.498969		0.0991303	0.00058492		0.125769	0.673108
P13639|EF2_HUMAN Elongation factor 2 OS=Homo sapiens OX=9606 GN=EEF2 PE=1 SV=4	P13639	EEF2		0	-0.233395	-0.254446	-0.0771976	-0.10831	0	-0.17979	-0.0588017	-0.379331	-0.105915	0	-0.355548	-0.454581	-0.288707	-0.299609	0	-0.514307	0.0234293	-0.368521	-0.150263		0		-0.32076	0.683087		-0.1861	0.24524		-0.278439	0.229307		-0.166024	0.707884
P08567|PLEK_HUMAN Pleckstrin OS=Homo sapiens OX=9606 GN=PLEK PE=1 SV=3	P08567	PLEK		0	0.156434	0.356566	0.0341662	0.0337103	0	0.430274	-0.257581	-0.352836	-0.235603	0	0.315982	0.931174	0.583542	0.32855	0	0.22132	0.266144	0.263074	0.0405443		0		0.281003	0.683087		0.324076	0.20896		0.131987	0.00058492		0.0418004	0.0572926
Q9NZU5|LMCD1_HUMAN LIM and cysteine-rich domains protein 1 OS=Homo sapiens OX=9606 GN=LMCD1 PE=1 SV=1	Q9NZU5	LMCD1		0	-0.103249	0.0230666	0.00592322	0.0318252	0	-0.367445	-0.112236	-0.772792	-0.475015	0	-0.304674	-0.248328	-0.116831	-0.183217	0	-0.328382	0.0420404	-0.122928	-0.345812		0		-0.275938	0.683087		-0.0738643	0.151847		-0.251657	0.00058492		-0.243055	0.521874
P04217|A1BG_HUMAN Alpha-1B-glycoprotein OS=Homo sapiens OX=9606 GN=A1BG PE=1 SV=4	P04217	A1BG		0	0.11584	0.525502	0.0303761	0.690117	0	0.755725	0.211187	0.472262	-0.0399702	0	0.743424	0.925683	0.193999	0.386608	0	0.829093	0.853692	0.645665	0.703656		0		0.61102	0.683087		0.629016	0.789379		0.335575	0.123971		0.435103	0.601757
P10909|CLUS_HUMAN Clusterin OS=Homo sapiens OX=9606 GN=CLU PE=1 SV=1	P10909	CLU		0	0.181383	0.488267	0.367053	0.622599	0	0.850208	0.146401	0.218821	-0.0989379	0	0.436268	0.4784	0.0789916	0.160057	0	0.567433	0.13226	0.488672	-0.487104		0		0.508823	0.683087		0.311332	0.53721		0.288384	0.167341		0.0491536	0.0290633
P0DOY3|IGLC3_HUMAN Immunoglobulin lambda constant 3 OS=Homo sapiens OX=9606 GN=IGLC3 PE=1 SV=1	P0DOY3	IGLC3		0	0.166413	1.28904	0.26591	1.37342	0	1.08749	0.335145	0.73246	-0.407468	0	1.11459	1.72879	0.994995	0.893993	0	0.81772	0.298835	0.676898	-0.205181		0		0.796554	0.683087		0.912952	0.439759		0.667566	0.605203		0.41369	0.211914
Q5HYI8|RABL3_HUMAN Rab-like protein 3 OS=Homo sapiens OX=9606 GN=RABL3 PE=1 SV=1	Q5HYI8	RABL3		0	0.145006	0.883711	0.0637505	0.14919	0	0.263957	0.110541	0.156901	0.121987	0	0.498602	0.68796	0.510254	0.243049	0	0.520123	0.101712	0.366158	0.0993118		0		0.356922	0.683087		0.445981	0.383873		0.274266	0.154106		0.153384	0.79811
P01834|IGKC_HUMAN Immunoglobulin kappa constant OS=Homo sapiens OX=9606 GN=IGKC PE=1 SV=2	P01834	IGKC		0	0.172325	1.00745	0.33349	0.970234	0	0.656727	0.257646	0.303002	-0.247621	0	1.04806	1.30409	0.3656	0.559595	0	0.665945	0.010838	0.624981	-0.31506		0		0.635764	0.683087		0.645006	0.346178		0.406768	0.605203		0.241787	0.157071
P38159|RBMX_HUMAN RNA-binding motif protein;X chromosome OS=Homo sapiens OX=9606 GN=RBMX PE=1 SV=3	P38159	RBMX		0	0.246674	0.174171	0.00695981	0.0945941	0	0.105971	-0.0677129	-0.210663	0.0847654	0	0.289102	0.132562	0.338582	0.00879507	0	0.343026	0.133834	0.25159	0.188308		0		0.246193	0.683087		0.0932135	0.231848		0.096617	0.00058492		0.0941156	0.461303
P69905|HBA_HUMAN Hemoglobin subunit alpha OS=Homo sapiens OX=9606 GN=HBA1 PE=1 SV=2	P69905	HBA1		0	0.461941	1.65292	0.611611	0.791066	0	1.43678	0.273394	0.737001	-0.0893792	0	0.545404	0.97852	-0.0211759	-0.154062	0	0.783962	-0.479244	0.317391	-0.824374		0		0.807022	0.683087		0.606398	0.20896		0.411207	0.136472		-0.0691873	0.0290633
P11166|GTR1_HUMAN Solute carrier family 2;facilitated glucose transporter member 1 OS=Homo sapiens OX=9606 GN=SLC2A1 PE=1 SV=2	P11166	SLC2A1		0	0.200753	1.42159	0.277461	0.721629	0	1.63015	0.611727	0.921157	-0.0688287	0	1.31547	1.8405	0.649539	0.378901	0	1.24265	-0.810897	0.716709	-0.907331		0		1.09726	0.683087		0.765729	0.208546		0.641216	0.605203		0.0310928	0.0125432
P10253|LYAG_HUMAN Lysosomal alpha-glucosidase OS=Homo sapiens OX=9606 GN=GAA PE=1 SV=4	P10253	GAA		0	0.241114	0.120086	0.136414	0.184812	0	0.132193	-0.0531267	-0.0568056	0.047614	0	0.226051	0.143138	0.219188	0.127397	0	0.373535	0.0536886	0.305205	0.16468		0		0.243223	0.683087		0.0659465	0.187859		0.151	0.00473085		0.131126	0.707884
O00748|EST2_HUMAN Cocaine esterase OS=Homo sapiens OX=9606 GN=CES2 PE=1 SV=1	O00748	CES2		0	0.255641	0.0572405	0.16348	0.133385	0	0.16286	-0.253738	-0.198817	0.155706	0	0.151519	0.0313512	0.0425849	0.0590907	0	0.156109	-0.260009	-0.0169635	-0.0515178		0		0.181532	0.683087		-0.106289	0.180038		-0.00242884	0.00019647		0.074166	0.302766
Q9UJY1|HSPB8_HUMAN Heat shock protein beta-8 OS=Homo sapiens OX=9606 GN=HSPB8 PE=1 SV=1	Q9UJY1	HSPB8		0	-0.12571	-0.0241285	-0.125671	-0.009943	0	-0.157686	-0.0899076	-0.321629	0.0356957	0	-0.230161	-0.173028	-0.0692846	-0.0288332	0	-0.261428	0.0431365	-0.12786	-0.0144629		0		-0.193746	0.683087		-0.0609818	0.168179		-0.161111	0.0868876		-0.00438583	0.0172753
P68871|HBB_HUMAN Hemoglobin subunit beta OS=Homo sapiens OX=9606 GN=HBB PE=1 SV=2	P68871	HBB		0	0.593428	1.86869	0.806756	0.997763	0	1.61859	0.577635	0.987277	0.0579824	0	1.21313	1.53939	0.547771	0.142124	0	0.439498	-1.11393	0.111253	-1.45768		0		0.966162	0.683087		0.717947	0.165408		0.613264	0.229307		-0.0649523	0.0177676
P02549|SPTA1_HUMAN Spectrin alpha chain;erythrocytic 1 OS=Homo sapiens OX=9606 GN=SPTA1 PE=1 SV=5	P02549	SPTA1		0	0.279662	1.17676	0.304081	0.604414	0	1.41663	0.466715	0.913449	-0.0583231	0	1.06719	1.49017	0.313947	0.286298	0	0.766453	-0.954377	0.464061	-1.09599		0		0.882485	0.683087		0.544817	0.151847		0.498885	0.294947		-0.0658992	0.0230191
P08519|APOA_HUMAN Apolipoprotein(a) OS=Homo sapiens OX=9606 GN=LPA PE=1 SV=1	P08519	LPA		0	0.331077	1.24136	0.258398	1.68836	0	0.153522	0.0482992	0.00848182	-0.0891786	0	0.648746	-0.118298	-0.317286	0.0164262	0	0.607656	-0.0102058	0.616115	-0.312689		0		0.43525	0.683087		0.290289	0.138753		0.141427	0.00058492		0.32573	0.14293
P52209|6PGD_HUMAN 6-phosphogluconate dehydrogenase;decarboxylating OS=Homo sapiens OX=9606 GN=PGD PE=1 SV=3	P52209	PGD		0	0.290836	0.219658	0.0650619	0.200206	0	0.760379	0.214411	0.209856	0.0780705	0	0.400379	0.379858	0.401097	0.0862106	0	0.260996	-0.332202	0.322363	-0.301298		0		0.428148	0.683087		0.120431	0.106207		0.249595	0.159453		0.0157972	0.0189567
Q8IXJ6|SIR2_HUMAN NAD-dependent protein deacetylase sirtuin-2 OS=Homo sapiens OX=9606 GN=SIRT2 PE=1 SV=2	Q8IXJ6	SIRT2		0	0.157607	-0.0131222	0.159817	0.0512351	0	0.163237	0.0564516	-0.00940922	0.166755	0	0.152406	-0.0188168	0.0701914	0.130157	0	0.236661	-0.122326	0.0991703	0.203622		0		0.177478	0.683087		-0.0244532	0.0674099		0.0799424	0.00058492		0.137942	0.707884
P21695|GPDA_HUMAN Glycerol-3-phosphate dehydrogenase [NAD(+)];cytoplasmic OS=Homo sapiens OX=9606 GN=GPD1 PE=1 SV=4	P21695	GPD1		0	-0.207945	-0.245358	-0.178801	-0.372942	0	-0.141898	0.0928487	-0.146049	-0.078862	0	-0.147634	-0.513716	-0.2796	-0.201544	0	-0.266308	0.49419	-0.0889924	0.188665		0		-0.190946	0.683087		-0.0430089	0.026984		-0.173361	0.154402		-0.116171	0.207944
P02649|APOE_HUMAN Apolipoprotein E OS=Homo sapiens OX=9606 GN=APOE PE=1 SV=1	P02649	APOE		0	0.180443	0.329917	0.0445525	0.43257	0	0.931349	0.277797	0.573764	0.0115237	0	0.45657	0.408319	0.203729	0.202714	0	0.605135	0.522788	0.94118	0.215568		0		0.543374	0.683087		0.384705	1.40718		0.440806	0.102991		0.215594	0.590733
P61129|ZC3H6_HUMAN Zinc finger CCCH domain-containing protein 6 OS=Homo sapiens OX=9606 GN=ZC3H6 PE=1 SV=2	P61129	ZC3H6		0	0.366884	1.24489	0.146752	0.246416	0					0	0.677837	0.930769	0.775747	0.235231							0		0.52236	0.683087		1.08783	1.33668		0.46125	0.0586894		0.240824	0.817797
P07355|ANXA2_HUMAN Annexin A2 OS=Homo sapiens OX=9606 GN=ANXA2 PE=1 SV=2	P07355	ANXA2		0	-0.192685	-0.247487	-0.00779718	0.345521	0	-0.302576	-0.317882	-0.621962	-0.45432	0	-0.342126	-0.191334	0.0379696	-0.378017	0	-0.743426	-0.153342	-0.552292	-0.109024		0		-0.395203	0.683087		-0.227511	1.07383		-0.28602	0.00473085		-0.14896	0.170803
P01042|KNG1_HUMAN Kininogen-1 OS=Homo sapiens OX=9606 GN=KNG1 PE=1 SV=2	P01042	KNG1		0	0.0705267	0.665334	-0.0400607	0.895467	0	0.769706	0.280547	0.080842	-0.117636	0	0.584426	0.912882	0.306507	0.408613	0	0.498961	0.474406	0.68725	0.158267		0		0.480905	0.683087		0.583292	0.919744		0.258635	0.00473085		0.336178	0.372686
A0A0A6YYL6|A0A0A6YYL6_HUMAN Protein RPL17-C18orf32 OS=Homo sapiens OX=9606 GN=RPL17-C18orf32 PE=3 SV=1	A0A0A6YYL6	RPL17-C18orf32		0	-0.314077	-0.131566	-0.154757	-0.160301	0	-0.449322	-0.116786	0.170226	0.473677	0	-0.184087	-0.222414	-0.239861	-0.0773051	0	-0.796819	-0.13829	-0.728299	-0.177044		0		-0.436076	0.683087		-0.152264	0.810385		-0.238172	0.00058492		0.0147567	0.0130483
A0A2R8Y6G6|A0A2R8Y6G6_HUMAN Alpha-enolase OS=Homo sapiens OX=9606 GN=ENO1 PE=1 SV=1	A0A2R8Y6G6	ENO1		0	-0.195587	-0.218298	-0.321268	-0.354863	0	-0.191592	-0.0802954	-0.0854381	-0.345769	0	-0.160611	-0.141783	0.0184947	-0.109124	0	-0.125556	-0.0908694	0.0355833	0.28113		0		-0.168336	0.683087		-0.132811	0.526763		-0.088157	0.00058492		-0.132157	0.18671
P04196|HRG_HUMAN Histidine-rich glycoprotein OS=Homo sapiens OX=9606 GN=HRG PE=1 SV=1	P04196	HRG		0	0.0877328	0.599048	0.113332	0.872067	0	0.843651	0.382777	0.369232	0.0249643	0	0.687496	0.855324	0.480333	0.419701	0	0.590013	0.0723713	0.562795	-0.159678		0		0.552223	0.683087		0.47738	0.498969		0.381423	0.309774		0.289263	0.293497
A0A096LPE2|A0A096LPE2_HUMAN SAA2-SAA4 readthrough OS=Homo sapiens OX=9606 GN=SAA2-SAA4 PE=4 SV=1	A0A096LPE2	SAA2-SAA4		0	0.0447095	0.597685	0.0237671	0.833412	0	0.753657	0.323135	0.365638	-0.174211	0	0.788722	0.847081	0.460261	0.526303	0	0.753484	0.102569	0.653724	-0.492042		0		0.585143	0.683087		0.467617	0.498969		0.375848	0.159453		0.173365	0.103421
P53041|PPP5_HUMAN Serine/threonine-protein phosphatase 5 OS=Homo sapiens OX=9606 GN=PPP5C PE=1 SV=1	P53041	PPP5C		0	-0.0908719	-0.15858	-0.158337	-0.113516	0	-0.229723	-0.0346047	0.0333744	-0.441417	0	-0.217824	-0.20435	0.0161029	-0.00858357	0	-0.298594	-0.146554	-0.0274783	-0.028432		0		-0.209253	0.683087		-0.136022	0.498969		-0.0340844	0.00058492		-0.147987	0.33137
H7C2N1|H7C2N1_HUMAN Prothymosin alpha (Fragment) OS=Homo sapiens OX=9606 GN=PTMA PE=1 SV=1	H7C2N1	PTMA		0	-0.532229	-0.438989	-0.648345	-0.238421	0	-0.248584	-0.237669	-0.578122	-0.0555282	0	-1.24135	-0.74327	-0.516293	-0.395511	0	-0.952029	-0.106863	-0.352291	-0.0454275		0		-0.743549	0.683087		-0.381698	0.471202		-0.523763	1.00359		-0.183722	0.503036
P06727|APOA4_HUMAN Apolipoprotein A-IV OS=Homo sapiens OX=9606 GN=APOA4 PE=1 SV=3	P06727	APOA4		0	0.189167	0.404123	0.277755	0.587193	0	0.766304	0.307162	0.503947	0.0308923	0	0.309311	0.41557	0.105562	0.134665	0	0.431423	-0.0118587	0.290125	-0.14887		0		0.424051	0.683087		0.278749	0.471202		0.294347	0.207614		0.15097	0.20767
Q9NRG7|D39U1_HUMAN Epimerase family protein SDR39U1 OS=Homo sapiens OX=9606 GN=SDR39U1 PE=1 SV=2	Q9NRG7	SDR39U1		0	0.196729	0.171218	0.143165	0.0847044	0	0.0955234	0.0440551	-0.0848415	0.154292	0	0.149848	0.0946641	0.131771	0.117704	0	0.239205	0.197494	0.259869	0.376429		0		0.170327	0.683087		0.126858	0.471202		0.112491	0.00058492		0.183282	0.606872
Q9C0C9|UBE2O_HUMAN (E3-independent) E2 ubiquitin-conjugating enzyme OS=Homo sapiens OX=9606 GN=UBE2O PE=1 SV=3	Q9C0C9	UBE2O		0	0.106756	0.208939	-0.00437324	-0.0275357	0	0.24712	0.0609244	0.0224847	0.159848	0	0.339991	0.294123	0.138553	0.141642	0	0.53089	0.0797137	0.475156	-0.0713034		0		0.306189	0.683087		0.160925	0.435741		0.157955	0.00058492		0.0506627	0.15402
P09543|CN37_HUMAN 2';3'-cyclic-nucleotide 3'-phosphodiesterase OS=Homo sapiens OX=9606 GN=CNP PE=1 SV=2	P09543	CNP		0	0.129297	0.153817	-0.0366267	0.619789	0	0.211658	0.114867	0.0607309	0.342891	0	0.254642	0.206608	0.123701	0.157656	0	0.146035	0.0191576	-0.0644585	0.0819297		0		0.185408	0.683087		0.123612	0.417768		0.0208368	0.00058492		0.300566	0.599603
Q13907|IDI1_HUMAN Isopentenyl-diphosphate Delta-isomerase 1 OS=Homo sapiens OX=9606 GN=IDI1 PE=1 SV=2	Q13907	IDI1		0	0.337151	0.946808	0.725087	0.201846	0	0.400326	0.296316	0.276601	0.55161	0	0.838998	0.474452	0.00868309	-0.0404223	0	0.226268	0.0540437	0.028267	0.497615		0		0.450686	0.683087		0.442905	0.396017		0.259659	0.00360751		0.302662	0.526716
A0A286YFJ8|A0A286YFJ8_HUMAN Immunoglobulin heavy constant gamma 4 (Fragment) OS=Homo sapiens OX=9606 GN=IGHG4 PE=1 SV=1	A0A286YFJ8	IGHG4		0	0.185121	1.53236	0.542497	0.9647	0	0.887612	0.379195	0.351601	-0.236895	0	1.44267	1.8102	0.710145	0.672843	0	0.875072	0.121863	0.865788	-0.256615		0		0.847619	0.683087		0.960906	0.394969		0.617508	0.605203		0.286008	0.199384
P02647|APOA1_HUMAN Apolipoprotein A-I OS=Homo sapiens OX=9606 GN=APOA1 PE=1 SV=1	P02647	APOA1		0	0.177811	0.908848	-0.00334635	1.21024	0	1.00412	0.38578	0.51842	-0.388295	0	1.1607	1.38904	0.618634	0.637737	0	0.530839	8.3e-05	0.362675	-0.864193		0		0.718368	0.683087		0.670937	0.383873		0.374096	0.154402		0.148873	0.0495022
A0A0B4J2B5|A0A0B4J2B5_HUMAN Immunoglobulin heavy variable 3/OR16-9 (non-functional) (Fragment) OS=Homo sapiens OX=9606 GN=IGHV3OR16-9 PE=1 SV=1	A0A0B4J2B5	IGHV3OR16-9		0	0.0529944	0.116798	0.000948136	0.361174	0	0.844786	0.279053	0.400396	-0.393223	0	0.683032	0.772269	0.527481	0.643797	0	0.756846	0.146556	0.772883	-0.456533		0		0.584415	0.683087		0.328669	0.353349		0.425427	0.154402		0.0388037	0.0191708
A0A1W2PPA3|A0A1W2PPA3_HUMAN Glial fibrillary acidic protein (Fragment) OS=Homo sapiens OX=9606 GN=GFAP PE=1 SV=1	A0A1W2PPA3	GFAP		0	-0.837685	-1.01809	-1.32692	-1.37569	0					0	-0.408513	-0.234869	0.36353	0.0230034							0		-0.623099	0.683087		-0.626477	0.332184		-0.481697	0.00058492		-0.676344	0.31761
P08603|CFAH_HUMAN Complement factor H OS=Homo sapiens OX=9606 GN=CFH PE=1 SV=4	P08603	CFH		0	0.0909929	0.490033	0.151113	0.53051	0	0.331038	0.0189548	0.00704106	-0.00341311	0	0.467193	0.605514	0.129429	0.274016	0	0.506174	0.0472204	0.363445	-0.0637301		0		0.34885	0.683087		0.29043	0.259656		0.162757	0.0315415		0.184346	0.307348
P11277|SPTB1_HUMAN Spectrin beta chain;erythrocytic OS=Homo sapiens OX=9606 GN=SPTB PE=1 SV=5	P11277	SPTB		0	0.0303353	0.631512	0.0312304	0.293838	0	0.558866	0.170193	0.231429	-0.0953413	0	0.591744	0.861005	0.274864	0.13918	0	0.676501	-0.0687547	0.404124	-0.0780609		0		0.464361	0.683087		0.398489	0.253163		0.235412	0.154402		0.064904	0.128918
Q9HA64|KT3K_HUMAN Ketosamine-3-kinase OS=Homo sapiens OX=9606 GN=FN3KRP PE=1 SV=2	Q9HA64	FN3KRP		0	0.379105	0.464561	0.285217	0.375435	0	0.0600494	0.0504532	-0.0477479	0.100727	0	0.318692	0.229398	0.231996	0.164124	0	0.460265	0.0282454	0.272056	0.276951		0		0.304528	0.683087		0.193164	0.249679		0.18538	0.0761993		0.229309	0.785447
Q96NA2|RILP_HUMAN Rab-interacting lysosomal protein OS=Homo sapiens OX=9606 GN=RILP PE=1 SV=1	Q96NA2	RILP		0	0.136811	0.593169	-0.0273189	0.0535292	0	0.388363	0.17414	-0.0502225	0.375152	0	0.707358	0.747543	0.31373	0.122339	0	0.433772	-0.102707	0.195876	-0.0487157		0		0.416576	0.683087		0.353036	0.249067		0.108016	0.00058492		0.125576	0.306348
P04040|CATA_HUMAN Catalase OS=Homo sapiens OX=9606 GN=CAT PE=1 SV=3	P04040	CAT		0	0.233084	1.72066	0.232969	0.707375	0	1.28224	0.403288	0.676457	-0.157556	0	1.67253	2.07589	0.633185	0.502101	0	0.898783	-0.313609	0.642897	-0.753204		0		1.02166	0.683087		0.971558	0.249067		0.546377	0.605203		0.074679	0.031972
P08962|CD63_HUMAN CD63 antigen OS=Homo sapiens OX=9606 GN=CD63 PE=1 SV=2	P08962	CD63		0	-0.46476	-0.670213	-0.642615	-0.506431	0					0	-0.270276	-0.0987353	0.194141	-0.0454961							0		-0.367518	0.683087		-0.384474	0.249067		-0.224237	0.00058492		-0.275964	0.375121
O14791|APOL1_HUMAN Apolipoprotein L1 OS=Homo sapiens OX=9606 GN=APOL1 PE=1 SV=5	O14791	APOL1		0	0.0475212	0.515735	-0.0153785	0.657316	0	0.810558	0.141144	0.237625	-0.160646	0	0.72759	0.940006	0.69483	0.671875	0	0.567818	-0.062578	0.586843	-0.298326		0		0.538372	0.683087		0.383577	0.24841		0.37598	0.112029		0.217555	0.178518
J3KQY1|J3KQY1_HUMAN 39S ribosomal protein L22;mitochondrial OS=Homo sapiens OX=9606 GN=MRPL22 PE=1 SV=1	J3KQY1	MRPL22		0	0.162651	-0.0162968	-0.0229953	0.151316	0	0.127718	0.119635	-0.0378538	0.344925	0	0.162134	0.0860187	0.0415178	-0.00893042	0	0.237067	0.129654	0.138986	0.325504		0		0.172392	0.683087		0.0797527	0.24841		0.0299136	0.00058492		0.203204	0.567981
P24158|PRTN3_HUMAN Myeloblastin OS=Homo sapiens OX=9606 GN=PRTN3 PE=1 SV=3	P24158	PRTN3		0	0.171525	1.05214	0.626217	0.777116	0	1.77634	-0.0250047	0.271444	0.270178	0	1.2029	2.29685	1.00411	0.991112	0	1.47911	0.133491	2.59024	0.0985863		0		1.15747	0.683087		0.864369	0.244194		1.123	0.112029		0.534248	0.618577
Q6ZN40|Q6ZN40_HUMAN Tropomyosin 1 (Alpha);isoform CRA_f OS=Homo sapiens OX=9606 GN=TPM1 PE=1 SV=1	Q6ZN40	TPM1		0	0.543982	0.122418	0.796434	0.119919	0	0.173092	0.646872	-0.227615	-0.154469	0	0.159265	0.366102	-0.0946939	-0.0818315	0	0.3821	-0.142705	0.187279	0.629352		0		0.31461	0.683087		0.248172	0.2286		0.165351	0.00058492		0.128243	0.145025
Q6XQN6|PNCB_HUMAN Nicotinate phosphoribosyltransferase OS=Homo sapiens OX=9606 GN=NAPRT PE=1 SV=2	Q6XQN6	NAPRT		0	0.0713248	0.239962	0.116689	0.109155	0	0.207495	-0.0218232	-0.0896647	0.166167	0	0.343471	0.242276	0.120807	-0.00550349	0	0.294998	-0.0169092	0.1693	0.137952		0		0.229322	0.683087		0.110876	0.212471		0.079283	0.00058492		0.101943	0.496619
P16452|EPB42_HUMAN Erythrocyte membrane protein band 4.2 OS=Homo sapiens OX=9606 GN=EPB42 PE=1 SV=3	P16452	EPB42		0	0.0609103	0.914208	0.0581519	0.331634	0	1.28749	0.464454	0.717545	0.0987484	0	0.889827	1.19094	0.433995	0.149379	0	1.09714	-0.539298	0.643353	-0.614483		0		0.833844	0.683087		0.507576	0.210384		0.463261	0.206088		-0.00868033	0.00430318
H3BS72|H3BS72_HUMAN Very-long-chain (3R)-3-hydroxyacyl-CoA dehydratase OS=Homo sapiens OX=9606 GN=HACD3 PE=1 SV=1	H3BS72	HACD3		0	0.139852	0.435332	0.0549825	0.138084	0	0.161212	-0.133289	-0.0848847	-0.054593	0	0.358344	0.417296	0.355334	0.496877	0	0.297684	0.0388961	0.238504	0.244027		0		0.239273	0.683087		0.189559	0.208546		0.140984	0.00058492		0.206099	0.419973
Q9UH99|SUN2_HUMAN SUN domain-containing protein 2 OS=Homo sapiens OX=9606 GN=SUN2 PE=1 SV=3	Q9UH99	SUN2		0	0.349038	0.714933	0.79322	0.84201	0	0.410931	-0.0390557	-0.0791772	0.063754	0	0.102543	0.109522	-0.0522763	0.094214	0	0.592501	0.0780495	0.757752	0.190111		0		0.363753	0.683087		0.215862	0.199175		0.35488	0.00058492		0.297522	0.386367
P16157|ANK1_HUMAN Ankyrin-1 OS=Homo sapiens OX=9606 GN=ANK1 PE=1 SV=3	P16157	ANK1		0	0.149186	0.804081	0.222827	0.518871	0	1.15678	0.411918	0.599709	0.0575445	0	0.653475	0.983527	0.256537	0.17328	0	0.936765	-0.519522	0.5501	-0.578431		0		0.724051	0.683087		0.420001	0.197364		0.407293	0.341961		0.0428161	0.023993
A0A0C4DFT7|A0A0C4DFT7_HUMAN Glycophorin OS=Homo sapiens OX=9606 GN=GYPA PE=1 SV=1	A0A0C4DFT7	GYPA		0	0.0773725	1.37226	0.128442	0.707514	0	0.980932	0.32471	0.511641	-0.211824	0	1.26687	1.79257	1.17817	0.521086	0	0.831069	-0.817615	0.26534	-0.859864		0		0.789059	0.683087		0.667981	0.179755		0.520898	0.112029		0.0392279	0.0152257
Q96DA6|TIM14_HUMAN Mitochondrial import inner membrane translocase subunit TIM14 OS=Homo sapiens OX=9606 GN=DNAJC19 PE=1 SV=3	Q96DA6	DNAJC19		0	0.181196	0.158103	0.0722534	0.108176	0	0.0812936	0.0527349	-0.0711277	0.041879	0	0.281165	0.215992	0.262777	0.0977219	0	0.237581	-0.0887571	0.101312	0.0643766		0		0.195309	0.683087		0.0845182	0.178639		0.0913036	0.00058492		0.0780384	0.519706
P27105|STOM_HUMAN Erythrocyte band 7 integral membrane protein OS=Homo sapiens OX=9606 GN=STOM PE=1 SV=3	P27105	STOM		0	0.118404	0.671169	0.140866	0.307484	0	1.08809	0.24375	0.316108	0.0174755	0	0.59884	0.882023	0.291134	0.124859	0	0.857411	-0.462225	0.609815	-0.364315		0		0.665687	0.683087		0.333679	0.173572		0.339481	0.213305		0.021376	0.0195641
P78356|PI42B_HUMAN Phosphatidylinositol 5-phosphate 4-kinase type-2 beta OS=Homo sapiens OX=9606 GN=PIP4K2B PE=1 SV=1	P78356	PIP4K2B		0	0.0692011	0.141806	-0.108776	0.14454	0	0.267532	-0.00630616	0.0554948	0.138231	0	0.303981	0.268276	0.210674	0.135988	0	0.376949	-0.0546765	0.24537	0.182397		0		0.254416	0.683087		0.0872748	0.16895		0.100691	0.00058492		0.150289	0.900496
Q96EY1|DNJA3_HUMAN DnaJ homolog subfamily A member 3;mitochondrial OS=Homo sapiens OX=9606 GN=DNAJA3 PE=1 SV=2	Q96EY1	DNAJA3		0	0.16704	0.154139	0.14477	0.134921	0	0.118504	0.0212195	-0.0889371	0.168038	0	0.1326	0.130396	0.00962714	0.153723	0	0.206702	-0.0697695	0.165458	0.141266		0		0.156212	0.683087		0.0589963	0.148548		0.0577297	0.00058492		0.149487	0.900496
O95298|NDUC2_HUMAN NADH dehydrogenase [ubiquinone] 1 subunit C2 OS=Homo sapiens OX=9606 GN=NDUFC2 PE=1 SV=1	O95298	NDUFC2		0	0.366879	0.0935382	0.284398	0.179028	0	0.13807	-0.0594478	-0.399673	-0.279551	0	0.151488	-0.1377	0.171906	0.0421218	0	0.301009	-0.128309	0.301612	-0.109557		0		0.239362	0.683087		-0.0579795	0.141788		0.0895606	0.00058492		-0.0419895	0.0668283
Q9BTZ2|DHRS4_HUMAN Dehydrogenase/reductase SDR family member 4 OS=Homo sapiens OX=9606 GN=DHRS4 PE=1 SV=3	Q9BTZ2	DHRS4		0	0.15252	0.0565203	0.0207729	0.0407304	0	0.232391	0.195156	-0.0617135	0.30574	0	0.11816	-0.00237756	0.0395246	-2.62e-05	0	0.153758	-0.03756	0.0391876	0.205396		0		0.164207	0.683087		0.0529347	0.13622		0.00944288	0.00058492		0.13796	0.425188
P02730|B3AT_HUMAN Band 3 anion transport protein OS=Homo sapiens OX=9606 GN=SLC4A1 PE=1 SV=3	P02730	SLC4A1		0	0.248144	1.37061	0.328043	0.726775	0	1.74118	0.561498	0.947193	-0.316794	0	1.14603	1.81747	0.759008	0.315122	0	0.817721	-1.51902	0.109487	-1.64021		0		0.988269	0.683087		0.55764	0.105423		0.535933	0.159453		-0.228777	0.0729826
O75027|ABCB7_HUMAN ATP-binding cassette sub-family B member 7;mitochondrial OS=Homo sapiens OX=9606 GN=ABCB7 PE=1 SV=2	O75027	ABCB7		0	0.102549	0.0469899	0.0474839	0.0268424	0	0.287349	0.160282	0.125809	0.174191	0	0.138328	0.131332	0.204101	0.178412	0	0.23423	-0.136762	0.145529	0.0530346		0		0.190614	0.683087		0.0504604	0.0907736		0.130731	0.0868876		0.10812	0.5039
Q9BZZ5|API5_HUMAN Apoptosis inhibitor 5 OS=Homo sapiens OX=9606 GN=API5 PE=1 SV=3	Q9BZZ5	API5		0	0.979882	0.69713	0.72092	0.664355	0	0.294964	-0.106247	-0.042969	-0.0384287	0	0.330624	-0.167565	-0.3598	0.155494	0	0.453589	0.0599266	0.392926	-0.138982		0		0.514765	0.683087		0.120811	0.0837745		0.177769	0.00058492		0.16061	0.191641
P11940|PABP1_HUMAN Polyadenylate-binding protein 1 OS=Homo sapiens OX=9606 GN=PABPC1 PE=1 SV=2	P11940	PABPC1							0	0.399765	-0.161825	0.091966	0.0061802						0	0.526543	0.0548051	0.444272	-0.00687474		0		0.463154	0.683087		-0.0535098	0.0625061		0.268119	0.00058492		-0.000347274	0.00106472
A0A286YFB1|A0A286YFB1_HUMAN Troponin T;fast skeletal muscle OS=Homo sapiens OX=9606 GN=TNNT3 PE=1 SV=1	A0A286YFB1	TNNT3		0	-0.186277	0.0271344	0.0576368	0.383708	0	-0.94702	0.50324	0.997201	1.42623	0	-0.466054	-0.559263	-0.343668	-0.0128984	0	-0.527717	0.439382	-1.0613	0.152222		0		-0.531767	0.683087		0.102623	0.0565245		-0.087532	0.00058492		0.487316	0.359301
Q16718|NDUA5_HUMAN NADH dehydrogenase [ubiquinone] 1 alpha subcomplex subunit 5 OS=Homo sapiens OX=9606 GN=NDUFA5 PE=1 SV=3	Q16718	NDUFA5		0	0.325597	0.111061	0.269872	0.141251	0	0.218799	-0.149526	-0.266312	-0.139355	0	0.109834	0.0345522	0.0801883	0.147697	0	0.192667	-0.093124	0.270904	0.10803		0		0.211724	0.683087		-0.0242592	0.0493006		0.0886628	0.00058492		0.0644057	0.180937
P02671|FIBA_HUMAN Fibrinogen alpha chain OS=Homo sapiens OX=9606 GN=FGA PE=1 SV=2	P02671	FGA		0	0.175442	-0.484242	-0.519394	-0.0581761	0	1.32238	0.226735	0.568427	-0.642209	0	0.671339	1.93828	0.226026	0.427561	0	1.01909	-0.868945	-0.810306	-1.31025		0		0.797063	0.683087		0.202956	0.0432402		-0.133812	0.00058492		-0.39577	0.237742
Q02127|PYRD_HUMAN Dihydroorotate dehydrogenase (quinone);mitochondrial OS=Homo sapiens OX=9606 GN=DHODH PE=1 SV=3	Q02127	DHODH		0	0.119025	0.0430753	-0.0203051	0.103766	0	0.120026	-0.133525	-0.162787	-0.0335136	0	0.231993	0.0541229	0.135732	0.191437	0	0.176787	-0.0137627	0.234695	0.182918		0		0.161958	0.683087		-0.0125224	0.0302321		0.0468336	0.00058492		0.111152	0.432772
Q9HCU5|PREB_HUMAN Prolactin regulatory element-binding protein OS=Homo sapiens OX=9606 GN=PREB PE=1 SV=2	Q9HCU5	PREB		0	0.2454	-0.0437193	0.153516	0.172653	0	0.114824	0.0378523	-0.160944	0.133199	0	0.212462	-0.0030073	0.107221	0.00523564	0	0.172068	-0.0224639	0.12905	0.169605		0		0.186188	0.683087		-0.00783454	0.0284203		0.0572106	0.00058492		0.120173	0.587499
Q8WXI3|ASB10_HUMAN Ankyrin repeat and SOCS box protein 10 OS=Homo sapiens OX=9606 GN=ASB10 PE=1 SV=2	Q8WXI3	ASB10		0	0.0854122	-0.236448	-0.591937	-0.0307508	0	0.47313	0.0502745	0.0150218	0.0467705	0	0.337965	0.416438	0.183501	0.424318	0	0.288838	-0.154396	0.217892	0.0911102		0		0.296336	0.683087		0.0189671	0.0176436		-0.0438807	0.00058492		0.132862	0.295664
P55042|RAD_HUMAN GTP-binding protein RAD OS=Homo sapiens OX=9606 GN=RRAD PE=1 SV=2	P55042	RRAD		0	0.189049	0.0622449	0.170195	0.268292	0	0.405194	-0.101204	0.143722	-0.000606768	0	0.146418	0.044092	0.0918296	0.112436	0	0.515048	-0.0193192	0.471864	0.0243801		0		0.313927	0.683087		-0.00354653	0.00920691		0.219403	0.102991		0.101125	0.347259
Q8N5M1|ATPF2_HUMAN ATP synthase mitochondrial F1 complex assembly factor 2 OS=Homo sapiens OX=9606 GN=ATPAF2 PE=1 SV=1	Q8N5M1	ATPAF2		0	0.0959741	-0.0569869	0.138526	0.0176458	0	0.161661	0.0478844	-0.216559	0.0982836	0	0.164827	-0.14197	0.0396206	0.0531435	0	0.184478	0.1599	0.202329	0.315395		0		0.151735	0.683087		0.00220682	0.00290625		0.0409792	0.00058492		0.121117	0.389225
Q15102|PA1B3_HUMAN Platelet-activating factor acetylhydrolase IB subunit gamma OS=Homo sapiens OX=9606 GN=PAFAH1B3 PE=1 SV=1	Q15102	PAFAH1B3		0	0.143099	0.315115	0.0346488	0.0684242	0	0.490884	0.0550803	0.0862393	0.0101833	0	0.19236	0.272268	0.0536186	0.126677	0	0.576328	0.116857	0.32423	0.156965		0		0.350668	0.683087		0.18983	0.478246		0.124684	0.00058492		0.0905623	0.483382
P02679|FIBG_HUMAN Fibrinogen gamma chain OS=Homo sapiens OX=9606 GN=FGG PE=1 SV=3	P02679	FGG		0	0.373967	0.056157	0.118032	0.375604	0	1.41878	0.578256	0.589087	-0.460417	0	0.397702	1.72251	0.242566	0.220896	0	1.40959	-0.00412942	0.324505	-0.223894		0		0.900009	0.683087		0.5882	0.231848		0.318547	0.192822		-0.0219526	0.0154293
Q96HC4|PDLI5_HUMAN PDZ and LIM domain protein 5 OS=Homo sapiens OX=9606 GN=PDLIM5 PE=1 SV=5	Q96HC4	PDLIM5		0	-0.13664	-0.121042	-0.0964249	-0.20707	0	-0.121447	-0.261492	-0.0304789	-0.00592645	0	-0.227711	-0.15746	-0.287227	-0.12042	0	-0.13976	-0.180594	-0.601012	-0.149149		0		-0.15639	0.683087		-0.180147	0.901923		-0.253786	0.0429955		-0.120641	0.553679
P08397|HEM3_HUMAN Porphobilinogen deaminase OS=Homo sapiens OX=9606 GN=HMBS PE=1 SV=2	P08397	HMBS		0	0.106495	0.504874	0.0317726	0.161629	0	0.204736	-0.00797746	-0.00292435	-0.110659	0	0.489622	0.521753	0.217081	0.158491	0	0.482913	-0.24365	0.305074	-0.0916754		0		0.320942	0.683087		0.19375	0.152089		0.137751	0.00360751		0.0294464	0.0577759
P39019|RS19_HUMAN 40S ribosomal protein S19 OS=Homo sapiens OX=9606 GN=RPS19 PE=1 SV=2	P39019	RPS19		0	-0.0909446	0.0222378	-0.0187642	-0.107299	0	-0.242078	0.00582063	-0.220933	-0.0659281	0	-0.30567	-0.180007	-0.196923	-0.0342764	0	-0.152804	0.147122	-0.213945	0.122225		0		-0.197874	0.683087		-0.0012066	0.00174999		-0.162641	0.112029		-0.0213196	0.0574457
Q9HA77|SYCM_HUMAN Probable cysteine--tRNA ligase;mitochondrial OS=Homo sapiens OX=9606 GN=CARS2 PE=1 SV=1	Q9HA77	CARS2		0	0.268277	0.0542588	0.238097	0.180329	0	0.0715685	0.0580214	-0.339017	0.0471574	0	0.426777	-0.071015	0.120252	0.362536	0	0.254218	-0.0702763	0.127096	0.439107		0		0.25521	0.683087		-0.00725278	0.0221727		0.036607	0.00058492		0.257282	0.673108
A0A0G2JJD3|A0A0G2JJD3_HUMAN HLA-B associated transcript 5;isoform CRA_b OS=Homo sapiens OX=9606 GN=ABHD16A PE=1 SV=1	A0A0G2JJD3	ABHD16A		0	0.210967	0.0540989	0.108733	0.113344	0	0.202581	0.141228	0.0943673	0.287647	0	0.097462	0.00770614	0.15676	0.09339	0	0.391802	0.139045	0.288613	0.196034		0		0.225703	0.683087		0.0855193	0.253163		0.162119	0.123971		0.172604	0.733658
Q9BYV6|TRI55_HUMAN Tripartite motif-containing protein 55 OS=Homo sapiens OX=9606 GN=TRIM55 PE=1 SV=2	Q9BYV6	TRIM55							0	0.489316	0.144372	0.145683	0.571959						0	0.816947	0.472638	0.626475	0.848021		0		0.653131	0.683087		0.308505	0.249067		0.386079	0.00473085		0.70999	0.821064
Q9NS86|LANC2_HUMAN LanC-like protein 2 OS=Homo sapiens OX=9606 GN=LANCL2 PE=1 SV=1	Q9NS86	LANCL2		0	0.463613	0.0806521	-0.061477	-0.0214636	0	0.103941	-0.028449	-0.0551549	0.0240947	0	0.18311	0.13424	0.190804	0.0875994	0	0.337995	-0.0198535	0.296534	0.0648331		0		0.272165	0.683087		0.0416476	0.12372		0.0926766	0.00058492		0.0387659	0.20767
A0A2R8YDM5|A0A2R8YDM5_HUMAN Laminin subunit alpha-2 (Fragment) OS=Homo sapiens OX=9606 GN=LAMA2 PE=1 SV=1	A0A2R8YDM5	LAMA2		0	0.234253	0.637581	0.256899	1.14147	0					0	0.346649	0.728612	0.180594	0.678586							0		0.290451	0.683087		0.683096	1.46587		0.218746	0.0952729		0.910028	0.900496
P00450|CERU_HUMAN Ceruloplasmin OS=Homo sapiens OX=9606 GN=CP PE=1 SV=1	P00450	CP		0	0.13105	0.5733	0.0149549	0.783742	0	1.0531	0.400075	0.568653	-0.226004	0	0.850099	0.963182	0.395349	0.410232	0	0.404055	0.200275	0.87298	-0.313931		0		0.609575	0.683087		0.534208	0.594576		0.462984	0.154402		0.16351	0.116202
P24666|PPAC_HUMAN Low molecular weight phosphotyrosine protein phosphatase OS=Homo sapiens OX=9606 GN=ACP1 PE=1 SV=3	P24666	ACP1		0	0.0893114	0.157653	0.115187	-0.136037	0	0.126929	0.0342133	-0.229872	0.075263	0	0.213615	0.157825	0.186582	0.0657342	0	0.222826	0.167196	0.0364806	0.0871914		0		0.16317	0.683087		0.129222	0.498969		0.0270943	0.00058492		0.0230379	0.0610901
P01031|CO5_HUMAN Complement C5 OS=Homo sapiens OX=9606 GN=C5 PE=1 SV=4	P01031	C5		0	0.0785129	0.400834	-0.0653979	0.52643	0	0.834824	0.22137	0.25631	-0.0522923	0	0.387221	0.536626	0.18961	0.243664	0	0.597704	0.0568828	0.598791	-0.145776		0		0.474565	0.683087		0.303928	0.497327		0.244828	0.0135242		0.143006	0.201276
P19827|ITIH1_HUMAN Inter-alpha-trypsin inhibitor heavy chain H1 OS=Homo sapiens OX=9606 GN=ITIH1 PE=1 SV=3	P19827	ITIH1		0	0.00827664	0.473446	-0.0214134	0.626559	0	0.52583	0.210268	0.257762	0.0678377	0	0.662313	0.816802	0.290541	0.302953	0	0.524344	0.148508	0.507975	0.112712		0		0.430191	0.683087		0.412256	0.471202		0.258716	0.102991		0.277516	0.517598
B0YIW2|B0YIW2_HUMAN Apolipoprotein C-III variant 1 OS=Homo sapiens OX=9606 GN=APOC3 PE=1 SV=1	B0YIW2	APOC3		0	0.101259	0.609442	0.155501	0.856507	0	1.32446	0.620921	0.904388	0.164687	0	1.28785	1.55927	0.18259	0.561026	0	0.705652	0.142	0.838769	-0.308538		0		0.854805	0.683087		0.732907	0.422229		0.520312	0.154402		0.31842	0.293212
I3L448|I3L448_HUMAN ATP synthase mitochondrial F1 complex assembly factor 1 OS=Homo sapiens OX=9606 GN=ATPAF1 PE=1 SV=1	I3L448	ATPAF1		0	0.117465	0.0575774	0.0746434	0.0467027	0	0.107331	0.105639	-0.116037	0.159546	0	0.217931	0.0656216	0.1426	0.181987	0	0.295818	0.0880271	0.161287	0.286611		0		0.184636	0.683087		0.0792162	0.406399		0.0656231	0.00058492		0.168711	0.690801
Q9NTX5|ECHD1_HUMAN Ethylmalonyl-CoA decarboxylase OS=Homo sapiens OX=9606 GN=ECHDC1 PE=1 SV=2	Q9NTX5	ECHDC1		0	0.216	0.275176	0.293644	0.349041	0	0.0834311	0.124466	-0.00291116	0.158277	0	0.452225	0.254993	0.164396	0.147984	0	0.278736	-0.0256911	0.173243	0.227371		0		0.257598	0.683087		0.157236	0.332184		0.157093	0.0672927		0.220668	0.900496
P04004|VTNC_HUMAN Vitronectin OS=Homo sapiens OX=9606 GN=VTN PE=1 SV=1	P04004	VTN		0	0.220803	0.582856	0.204992	0.807008	0	1.19989	0.156799	0.18332	-0.1953	0	0.537089	1.27276	0.557173	0.560776	0	0.498231	0.0260459	0.748078	-0.159938		0		0.614004	0.683087		0.509616	0.249067		0.423391	0.20572		0.253137	0.220752
P28289|TMOD1_HUMAN Tropomodulin-1 OS=Homo sapiens OX=9606 GN=TMOD1 PE=1 SV=1	P28289	TMOD1		0	0.0590537	0.438552	0.163782	0.291588	0	0.286269	0.0578467	0.0774195	0.332072	0	0.241457	0.344552	0.129669	-0.0131075	0	0.427082	-0.069706	0.251399	0.0309034		0		0.253465	0.683087		0.192811	0.243011		0.155567	0.136472		0.160364	0.414432
P00747|PLMN_HUMAN Plasminogen OS=Homo sapiens OX=9606 GN=PLG PE=1 SV=2	P00747	PLG		0	0.0469412	0.359269	-0.0205677	0.267865	0	0.69662	0.0764996	0.156242	-0.0340367	0	0.4123	1.32307	0.0558646	0.316806	0	0.616857	0.0621008	0.645	0.0450905		0		0.44318	0.683087		0.455235	0.238742		0.209135	0.00058492		0.148931	0.393851
Q9HCC0|MCCB_HUMAN Methylcrotonoyl-CoA carboxylase beta chain;mitochondrial OS=Homo sapiens OX=9606 GN=MCCC2 PE=1 SV=1	Q9HCC0	MCCC2		0	0.198645	0.196288	0.178866	0.140122	0	0.132078	0.0788571	0.0599437	0.226037	0	0.270109	0.149676	0.101955	0.152768	0	0.0923231	-0.0493773	0.152824	0.265785		0		0.173289	0.683087		0.093861	0.235701		0.123397	0.0868876		0.196178	0.900496
E9PI68|E9PI68_HUMAN Signal peptidase complex subunit 2 OS=Homo sapiens OX=9606 GN=SPCS2 PE=1 SV=1	E9PI68	SPCS2		0	0.0939071	-0.0260571	-0.152975	-0.106066	0	0.417216	0.2387	0.230667	0.564484	0	0.181429	-0.0176278	0.403596	0.335735	0	0.466872	0.554591	0.18038	0.392867		0		0.289856	0.683087		0.187402	0.210384		0.165417	0.00058492		0.296755	0.496619
Q5TDH0|DDI2_HUMAN Protein DDI1 homolog 2 OS=Homo sapiens OX=9606 GN=DDI2 PE=1 SV=1	Q5TDH0	DDI2		0	0.120632	1.5342	0.139835	0.662763	0	0.559992	0.0656274	0.229658	-0.0903698	0	1.28869	1.69018	0.947925	0.506526	0	0.999681	-0.506098	0.517455	-0.670317		0		0.742248	0.683087		0.695977	0.203421		0.458718	0.154402		0.102151	0.0547106
P61626|LYSC_HUMAN Lysozyme C OS=Homo sapiens OX=9606 GN=LYZ PE=1 SV=1	P61626	LYZ		0	0.550906	1.00597	0.704358	1.124	0	2.85482	0.18476	0.742417	-0.114714	0	0.785851	1.69693	1.80989	0.772237	0	2.42656	-0.619713	3.86213	0.182105		0		1.65454	0.683087		0.566986	0.175867		1.7797	0.154402		0.490906	0.424772
I3L0E3|I3L0E3_HUMAN HCG1984214;isoform CRA_a OS=Homo sapiens OX=9606 GN=hCG_1984214 PE=4 SV=1	I3L0E3	hCG_1984214		0	0.429613	0.175218	0.221841	0.279732	0	0.196754	0.201539	-0.153747	0.278489	0	0.404976	0.163401	0.19525	0.0943686	0	0.0739741	-0.156774	0.052606	-0.0190268		0		0.276329	0.683087		0.0958459	0.165162		0.0789873	0.00058492		0.158391	0.48498
S4R3N1|S4R3N1_HUMAN HSPE1-MOB4 readthrough OS=Homo sapiens OX=9606 GN=HSPE1-MOB4 PE=3 SV=1	S4R3N1	HSPE1-MOB4		0	0.27047	0.1055	-0.107878	-0.0156521	0	0.048752	0.0628868	-0.466957	0.0965796	0	0.247414	-0.0911105	-0.231179	-0.114185	0	0.35971	0.235347	0.117614	0.32364		0		0.231587	0.683087		0.0781557	0.163027		-0.1721	0.00058492		0.0725955	0.147292
P21980|TGM2_HUMAN Protein-glutamine gamma-glutamyltransferase 2 OS=Homo sapiens OX=9606 GN=TGM2 PE=1 SV=2	P21980	TGM2		0	0.0416739	0.426997	0.0464419	0.158683	0	0.321338	0.436269	0.0368548	0.137206	0	0.271365	0.271709	0.203322	0.11767	0	0.369574	-0.347795	0.221774	-0.146767		0		0.250988	0.683087		0.196795	0.162951		0.127098	0.0187592		0.0666979	0.180729
A8MSY1|A8MSY1_HUMAN TMEM110-MUSTN1 readthrough OS=Homo sapiens OX=9606 GN=TMEM110-MUSTN1 PE=4 SV=1	A8MSY1	TMEM110-MUSTN1		0	-0.975583	-0.98815	-1.37563	-0.834344	0	-0.599859	-0.00671787	-0.936022	0.173223	0	-0.259561	-0.0478159	0.206889	0.0362646	0	-1.65775	0.181889	-1.03477	-1.23523		0		-0.873189	0.683087		-0.215199	0.121984		-0.784883	0.123971		-0.465022	0.320632
Q7Z2K6|ERMP1_HUMAN Endoplasmic reticulum metallopeptidase 1 OS=Homo sapiens OX=9606 GN=ERMP1 PE=1 SV=2	Q7Z2K6	ERMP1		0	0.0405017	0.0159483	-0.124473	-0.380347	0	0.411592	0.116746	0.0211972	-0.0374758	0	0.289602	-0.0950754	0.252464	0.203178	0	0.373839	0.114768	0.289618	0.431138		0		0.278883	0.683087		0.0380967	0.0855426		0.109702	0.00058492		0.0541233	0.0476455
O95336|6PGL_HUMAN 6-phosphogluconolactonase OS=Homo sapiens OX=9606 GN=PGLS PE=1 SV=2	O95336	PGLS		0	0.0771037	0.159391	0.0697741	0.0417587	0	0.174633	-0.0848782	-0.228553	-0.0938951	0	0.248585	0.190735	0.189263	0.0677183	0	0.343242	-0.120606	0.246326	-0.0414435		0		0.210891	0.683087		0.0361605	0.0565245		0.0692027	0.00058492		-0.00646538	0.0180564
Q9UBK8|MTRR_HUMAN Methionine synthase reductase OS=Homo sapiens OX=9606 GN=MTRR PE=1 SV=3	Q9UBK8	MTRR							0	0.484721	-0.0194897	-0.297489	0.158254						0	0.352408	-0.00333233	0.163631	-0.174414		0		0.418564	0.683087		-0.011411	0.0235726		-0.0669295	0.00058492		-0.00807999	0.0066719
Q96DC8|ECHD3_HUMAN Enoyl-CoA hydratase domain-containing protein 3;mitochondrial OS=Homo sapiens OX=9606 GN=ECHDC3 PE=1 SV=2	Q96DC8	ECHDC3		0	0.131199	-0.0311375	0.0203719	0.13487	0	0.118075	0.176478	0.00657785	0.266981	0	0.142222	-0.0950602	0.0611032	0.084549	0	0.146832	-0.0720162	0.0886396	0.399907		0		0.134582	0.683087		-0.00543402	0.00995605		0.0441731	0.00058492		0.221577	0.690801
P30046|DOPD_HUMAN D-dopachrome decarboxylase OS=Homo sapiens OX=9606 GN=DDT PE=1 SV=3	P30046	DDT		0	-0.129249	0.0317514	-0.171221	-0.331401	0	-0.132152	0.0694299	-0.13988	0.109563	0	-0.189012	0.219576	-0.208906	-0.0207479	0	-0.364182	0.0507792	-2.03976	-0.056474		0		-0.203649	0.683087		0.0928843	0.249067		-0.639941	0.00058492		-0.074765	0.155736
P30043|BLVRB_HUMAN Flavin reductase (NADPH) OS=Homo sapiens OX=9606 GN=BLVRB PE=1 SV=3	P30043	BLVRB		0	0.0542706	0.638674	-0.0353735	0.132705	0	0.4636	0.147221	0.0659582	-0.000466347	0	0.65953	0.836438	0.0648817	0.0881881	0	0.343656	-0.101517	0.254755	-0.240141		0		0.380264	0.683087		0.380204	0.249067		0.0875554	0.00058492		-0.00492851	0.00697887
A0A0B4J231|A0A0B4J231_HUMAN Immunoglobulin lambda-like polypeptide 5 OS=Homo sapiens OX=9606 GN=IGLL5 PE=1 SV=1	A0A0B4J231	IGLL5		0	-0.0137095	0.610691	-0.00791695	0.614585	0	1.06672	0.34197	0.586653	-0.313366	0	1.01857	1.36006	0.1406	0.510369	0	0.795429	-0.236009	0.563873	-0.778762		0		0.716753	0.683087		0.519179	0.243011		0.320802	0.0868876		0.00820652	0.00255429
Q00796|DHSO_HUMAN Sorbitol dehydrogenase OS=Homo sapiens OX=9606 GN=SORD PE=1 SV=4	Q00796	SORD		0	0.136714	-0.0565349	-0.0254155	0.0820783	0	0.207365	0.202993	0.0102257	0.234509	0	0.0811152	-0.0573301	0.132065	0.147029	0	0.19417	0.0960032	0.0638095	0.0895962		0		0.154841	0.683087		0.0462828	0.086843		0.0451712	0.00058492		0.138303	0.690801
Q8IWA5|CTL2_HUMAN Choline transporter-like protein 2 OS=Homo sapiens OX=9606 GN=SLC44A2 PE=1 SV=3	Q8IWA5	SLC44A2		0	0.163737	-0.118763	0.198067	0.301959	0	0.0882184	0.115364	-0.153841	0.195356	0	0.151476	0.0428022	0.460127	0.419336	0	0.26721	0.0656461	0.1692	0.147718		0		0.16766	0.683087		0.0262625	0.0592201		0.168388	0.00058492		0.266092	0.900496
Q13492|PICAL_HUMAN Phosphatidylinositol-binding clathrin assembly protein OS=Homo sapiens OX=9606 GN=PICALM PE=1 SV=2	Q13492	PICALM		0	0.111013	0.220463	0.108602	0.171853	0	0.429331	0.192713	0.0887477	0.194493	0	0.134821	0.126339	0.247555	0.232077	0	0.389838	0.0732604	0.205066	0.159834		0		0.266251	0.683087		0.153194	0.639118		0.162493	0.154106		0.189564	1.00298
P02787|TRFE_HUMAN Serotransferrin OS=Homo sapiens OX=9606 GN=TF PE=1 SV=3	P02787	TF		0	0.0113049	0.672	0.405282	1.10961	0	0.779091	0.226664	0.399212	-0.0694799	0	0.606288	0.667103	0.0868771	-0.0061191	0	0.511111	-0.0169199	0.452576	-0.375577		0		0.476949	0.683087		0.387212	0.388216		0.335987	0.309774		0.164607	0.0890092
A0A087WW87|KV240_HUMAN Immunoglobulin kappa variable 2-40 OS=Homo sapiens OX=9606 GN=IGKV2-40 PE=3 SV=2	A0A087WW87	IGKV2-40		0	0.133022	0.930165	0.125043	1.29459	0	1.14494	-0.0668115	0.903875	-1.86074	0	2.11863	2.64338	0.304028	1.58018	0	1.14628	0.49757	1.10839	-0.0182768		0		1.13572	0.683087		1.00107	0.248205		0.610335	0.154402		0.248938	0.0497872
P05164|PERM_HUMAN Myeloperoxidase OS=Homo sapiens OX=9606 GN=MPO PE=1 SV=1	P05164	MPO		0	0.0299754	0.633034	0.335667	0.8156	0	1.68214	0.0993572	0.209592	0.0746563	0	0.968348	2.30687	0.26107	0.558326	0	1.41397	-0.255917	2.40696	0.0246325		0		1.02361	0.683087		0.695837	0.193866		0.803322	0.00360751		0.368304	0.462184
Q99541|PLIN2_HUMAN Perilipin-2 OS=Homo sapiens OX=9606 GN=PLIN2 PE=1 SV=2	Q99541	PLIN2		0	0.672198	0.278172	0.712965	0.483138	0	0.189618	0.0388175	-0.142176	0.196337	0	0.775538	0.148389	0.560555	0.403205	0	0.184778	-0.145041	-0.134052	-0.150852		0		0.455533	0.683087		0.0800844	0.127717		0.249323	0.00058492		0.232957	0.386931
P61353|RL27_HUMAN 60S ribosomal protein L27 OS=Homo sapiens OX=9606 GN=RPL27 PE=1 SV=2	P61353	RPL27		0	-0.68493	-0.162626	-0.0946988	-0.136517	0	-0.864234	0.0337265	-0.118504	0.418907	0	-0.243734	-0.0622788	-0.454011	0.118087	0	-0.165049	0.085258	-0.553198	-0.0877406		0		-0.489487	0.683087		-0.02648	0.0567514		-0.305103	0.146836		0.078184	0.113548
P00915|CAH1_HUMAN Carbonic anhydrase 1 OS=Homo sapiens OX=9606 GN=CA1 PE=1 SV=2	P00915	CA1		0	0.334918	1.78509	0.314749	0.68029	0	1.99704	1.17212	1.06889	-0.601145	0	1.68984	2.11128	0.732236	0.523887	0	0.562889	-1.11421	-0.0961126	-1.92165		0		1.14617	0.683087		0.988568	0.212471		0.50494	0.0868876		-0.329654	0.0999168
P06312|KV401_HUMAN Immunoglobulin kappa variable 4-1 OS=Homo sapiens OX=9606 GN=IGKV4-1 PE=1 SV=1	P06312	IGKV4-1		0	0.0258027	0.106324	-0.259902	0.110881	0	0.799204	0.228597	0.335101	-0.296854	0	0.464166	0.587445	0.31823	0.30116	0	0.773016	0.00101597	0.73625	-0.471924		0		0.515547	0.683087		0.230846	0.249067		0.28242	0.00058492		-0.0891844	0.0866254
Q6ZUT6|CCD9B_HUMAN Coiled-coil domain-containing protein 9B OS=Homo sapiens OX=9606 GN=CCDC9B PE=1 SV=1	Q6ZUT6	CCDC9B		0	0.196192	0.0182401	-0.0881808	-0.00318628	0	0.123166	0.168395	0.145911	0.341578	0	0.124624	0.0591827	0.236476	0.364299	0	0.109446	0.0663736	0.128993	0.244699		0		0.138357	0.683087		0.0780478	0.24841		0.1058	0.00058492		0.236847	0.646007
P05109|S10A8_HUMAN Protein S100-A8 OS=Homo sapiens OX=9606 GN=S100A8 PE=1 SV=1	P05109	S100A8		0	0.173057	0.910292	0.478035	0.988495	0	2.54292	0.766933	0.722483	0.13127	0	1.02386	2.23194	0.718051	0.585872	0	1.95035	-0.0227207	3.27766	0.216964		0		1.42255	0.683087		0.97161	0.332184		1.29906	0.0868876		0.48065	0.599603
Q9BZE1|RM37_HUMAN 39S ribosomal protein L37;mitochondrial OS=Homo sapiens OX=9606 GN=MRPL37 PE=1 SV=2	Q9BZE1	MRPL37		0	0.346892	-0.00036759	0.168969	-0.0613937	0	0.142617	0.0559895	-0.0587166	0.205472	0	0.084587	-0.00583857	0.063303	0.0403617	0	0.226154	-0.00261155	0.165257	0.197649		0		0.200062	0.683087		0.0117929	0.0442652		0.0847031	0.00058492		0.0955221	0.307375
A0A0C4DH31|HV118_HUMAN Immunoglobulin heavy variable 1-18 OS=Homo sapiens OX=9606 GN=IGHV1-18 PE=3 SV=1	A0A0C4DH31	IGHV1-18		0	0.00451677	0.183896	-0.270021	0.31128	0	0.922353	0.304949	0.540667	-0.289218	0	0.532959	0.540567	0.250106	0.419582	0	0.817429	0.15529	0.815502	-0.423512		0		0.569315	0.683087		0.296175	0.579754		0.334064	0.00058492		0.00453295	0.00255429
X6R5Z6|X6R5Z6_HUMAN Cytochrome c oxidase assembly factor 6 homolog OS=Homo sapiens OX=9606 GN=COA6 PE=1 SV=1	X6R5Z6	COA6		0	0.284268	0.115695	0.225483	0.277863	0	0.0281136	0.137691	0.130908	0.211015	0	0.232873	0.0398261	0.130676	0.184389	0	0.283909	0.171579	0.218807	0.16901		0		0.207291	0.683087		0.116198	0.482559		0.176468	0.20572		0.210569	1.00298
P53396|ACLY_HUMAN ATP-citrate synthase OS=Homo sapiens OX=9606 GN=ACLY PE=1 SV=3	P53396	ACLY		0	0.0973412	0.407065	-0.00831399	0.069464	0	0.618773	0.23574	0.319459	-0.0775648	0	0.247031	0.282352	0.227162	0.188104	0	0.724071	-0.251365	0.496994	-0.102957		0		0.421804	0.683087		0.168448	0.178639		0.258825	0.112029		0.0192615	0.0373474
Q9Y3A5|SBDS_HUMAN Ribosome maturation protein SBDS OS=Homo sapiens OX=9606 GN=SBDS PE=1 SV=4	Q9Y3A5	SBDS		0	-0.294132	-0.136235	-0.264789	-0.34058	0	-0.0809345	-0.181954	-0.714528	-0.51687	0	-0.160698	-0.123181	-0.180762	-0.0385104	0	-0.425676	0.114518	-0.330652	-0.0117716		0		-0.24036	0.683087		-0.081713	0.171241		-0.372683	0.20572		-0.226933	0.432772
O94875|SRBS2_HUMAN Sorbin and SH3 domain-containing protein 2 OS=Homo sapiens OX=9606 GN=SORBS2 PE=1 SV=3	O94875	SORBS2		0	0.439814	-0.167184	0.49169	-0.0493683	0					0	0.223797	0.0142011	-0.130012	0.0464401							0		0.331806	0.683087		-0.0764914	0.139514		0.180839	0.00058492		-0.00146408	0.00255429
P30040|ERP29_HUMAN Endoplasmic reticulum resident protein 29 OS=Homo sapiens OX=9606 GN=ERP29 PE=1 SV=4	P30040	ERP29		0	0.0671471	0.0611017	-0.0289668	0.0270364	0	0.308993	0.237333	0.105987	0.388549	0	0.140917	0.0887948	0.171374	0.0963753	0	0.345049	0.304277	0.291089	0.46866		0		0.215527	0.683087		0.172877	0.449866		0.134871	0.00473085		0.245155	0.533712
Q96RD7|PANX1_HUMAN Pannexin-1 OS=Homo sapiens OX=9606 GN=PANX1 PE=1 SV=4	Q96RD7	PANX1		0	-0.317688	-0.292684	-0.608344	-0.459613	0					0	-0.209197	-0.11383	0.120853	0.151513							0		-0.263443	0.683087		-0.203257	0.388216		-0.243746	0.00058492		-0.15405	0.141511
A0A286YES1|A0A286YES1_HUMAN Immunoglobulin heavy constant gamma 3 (Fragment) OS=Homo sapiens OX=9606 GN=IGHG3 PE=1 SV=1	A0A286YES1	IGHG3		0	0.0130622	0.496308	-0.0175883	0.586514	0	0.615271	0.138076	0.263744	-0.430035	0	0.850595	1.06003	0.252413	0.312191	0	0.461192	0.0305173	0.558187	-0.36421		0		0.48503	0.683087		0.431234	0.251842		0.264189	0.0868876		0.0261147	0.0147689
P04921|GLPC_HUMAN Glycophorin-C OS=Homo sapiens OX=9606 GN=GYPC PE=1 SV=1	P04921	GYPC		0	-0.0338481	0.849857	-0.407451	0.163635	0	0.84933	0.221732	0.507523	0.290461	0	0.704528	1.38618	0.906183	0.444174	0	1.03235	-0.0926834	0.779041	0.04819		0		0.638091	0.683087		0.59127	0.249067		0.446324	0.00360751		0.236615	0.638393
Q9UPQ0|LIMC1_HUMAN LIM and calponin homology domains-containing protein 1 OS=Homo sapiens OX=9606 GN=LIMCH1 PE=1 SV=4	Q9UPQ0	LIMCH1		0	0.227118	0.12813	0.279981	0.0696001	0					0	0.247371	0.0683685	-0.175596	0.134057							0		0.237244	0.683087		0.0982494	0.24352		0.0521925	0.00058492		0.101829	0.385911
H0YKX5|H0YKX5_HUMAN Tropomyosin alpha-1 chain (Fragment) OS=Homo sapiens OX=9606 GN=TPM1 PE=1 SV=1	H0YKX5	TPM1		0	0.0615357	0.47411	0.136059	0.29788	0	0.718067	0.199935	0.0641439	0.0794588	0	0.303255	0.688305	0.192544	0.224384	0	0.477144	-0.315883	0.355432	0.135604		0		0.39	0.683087		0.261617	0.18638		0.187045	0.113633		0.184332	0.744169
E9PAV3|NACAM_HUMAN Nascent polypeptide-associated complex subunit alpha;muscle-specific form OS=Homo sapiens OX=9606 GN=NACA PE=1 SV=1	E9PAV3	NACA		0	-0.0551293	-0.0605218	-0.068561	-0.203929	0	-0.158388	-0.107679	-0.295286	0.0909108	0	-0.241229	-0.36605	-0.0859988	-0.125286	0	-0.283109	0.0808838	-0.327401	-0.0238527		0		-0.184464	0.683087		-0.113342	0.181502		-0.194312	0.112029		-0.0655394	0.199384
Q9BYD2|RM09_HUMAN 39S ribosomal protein L9;mitochondrial OS=Homo sapiens OX=9606 GN=MRPL9 PE=1 SV=2	Q9BYD2	MRPL9		0	0.103207	-0.150441	-0.0274349	-0.222089	0	0.277609	-0.135641	-0.146702	0.0590301	0	0.113716	0.0819663	-0.0562597	0.0793257	0	0.390979	-0.0825043	0.715757	0.0317383		0		0.221378	0.683087		-0.0716549	0.181502		0.12134	0.00058492		-0.0129989	0.0216354
F5GXJ1|F5GXJ1_HUMAN NADH dehydrogenase [ubiquinone] iron-sulfur protein 7;mitochondrial OS=Homo sapiens OX=9606 GN=NDUFS7 PE=1 SV=1	F5GXJ1	NDUFS7		0	0.463411	0.165042	0.723998	0.670798	0	0.114254	-0.0424687	-0.0467796	0.0313711	0	0.226937	-0.108286	0.0597828	0.00558244	0	0.161943	0.591273	-0.151398	0.287391		0		0.241636	0.683087		0.15139	0.142568		0.146401	0.00058492		0.248786	0.380945
M0QXB5|M0QXB5_HUMAN Persulfide dioxygenase ETHE1;mitochondrial OS=Homo sapiens OX=9606 GN=ETHE1 PE=1 SV=1	M0QXB5	ETHE1		0	0.100618	0.247055	0.0539733	0.249079	0	0.0974888	-0.000600276	-0.0806432	0.245575	0	0.265749	0.150567	0.20382	0.188826	0	0.195556	-0.0983235	0.185604	0.232072		0		0.164853	0.683087		0.0746745	0.137833		0.0906885	0.00058492		0.228888	1.01445
Q9NX47|MARH5_HUMAN E3 ubiquitin-protein ligase MARCH5 OS=Homo sapiens OX=9606 GN=MARCH5 PE=1 SV=1	Q9NX47	2024-03-05		0	0.132792	0.0699902	0.0538297	-0.0727173	0	0.12287	-0.0242462	-0.0656717	0.0802107	0	0.17955	-0.00398535	0.230376	0.138443	0	0.388436	0.0915011	0.225775	0.268229		0		0.205912	0.683087		0.0333149	0.109946		0.111077	0.00058492		0.103541	0.311152
P13805|TNNT1_HUMAN Troponin T;slow skeletal muscle OS=Homo sapiens OX=9606 GN=TNNT1 PE=1 SV=4	P13805	TNNT1		0	0.475106	0.396669	0.519741	0.31622	0	0.346337	-0.463786	-0.277881	0.336881	0	0.183217	-0.00411311	-0.132538	-0.234553	0	0.0671383	-0.471626	0.406087	-0.0132058		0		0.26795	0.683087		-0.135714	0.0855426		0.128852	0.00058492		0.101336	0.145467
Q5RI15|COX20_HUMAN Cytochrome c oxidase assembly protein COX20;mitochondrial OS=Homo sapiens OX=9606 GN=COX20 PE=1 SV=2	Q5RI15	COX20		0	0.102859	-0.0142741	0.0339078	-0.0246836	0	0.38889	0.109722	0.184753	0.11197	0	0.145259	-0.0316943	0.09395	0.0811933	0	0.507035	0.0457577	0.484282	-0.0520983		0		0.286011	0.683087		0.0273778	0.0837745		0.199223	0.0306846		0.0290953	0.102816
P36871|PGM1_HUMAN Phosphoglucomutase-1 OS=Homo sapiens OX=9606 GN=PGM1 PE=1 SV=3	P36871	PGM1		0	-0.272865	-0.212714	-0.207531	0.00360162	0	-0.211121	0.0750622	0.197159	-0.217671	0	-0.438775	-0.405102	-0.165175	-0.245092	0	-0.0580695	0.275492	-0.0387518	0.247767		0		-0.245208	0.683087		-0.0668155	0.0590431		-0.0535747	0.00058492		-0.0528485	0.0729826
E9PEW8|E9PEW8_HUMAN Hemoglobin subunit delta (Fragment) OS=Homo sapiens OX=9606 GN=HBD PE=1 SV=1	E9PEW8	HBD		0	0.181391	1.79041	0.056055	0.629991	0	2.13737	0.686283	1.24165	-0.0882587	0	1.7088	2.13078	0.799946	0.636231	0	0.728428	-1.11027	0.43584	-1.41565		0		1.189	0.683087		0.874301	0.186592		0.633372	0.154402		-0.0594206	0.0172906
Q86VP6|CAND1_HUMAN Cullin-associated NEDD8-dissociated protein 1 OS=Homo sapiens OX=9606 GN=CAND1 PE=1 SV=2	Q86VP6	CAND1		0	0.0255075	0.29947	-0.0845297	0.0384042	0	0.502828	0.135638	0.0781327	0.109851	0	0.280038	0.341889	0.216495	0.120687	0	0.348723	0.0104977	0.298551	-0.154196		0		0.289274	0.683087		0.196874	0.409241		0.127162	0.00058492		0.0286863	0.066696
Q9Y4J8|DTNA_HUMAN Dystrobrevin alpha OS=Homo sapiens OX=9606 GN=DTNA PE=1 SV=2	Q9Y4J8	DTNA		0	0.0604331	0.199939	0.101747	0.254038	0	0.184733	-0.0872422	-0.143434	0.108283	0	0.158926	0.149586	0.0925086	0.174966	0	0.168556	-0.00687225	0.108408	0.132325		0		0.143162	0.683087		0.0638526	0.133223		0.0398072	0.00058492		0.167403	0.839238
Q2PPJ7|RGPA2_HUMAN Ral GTPase-activating protein subunit alpha-2 OS=Homo sapiens OX=9606 GN=RALGAPA2 PE=1 SV=2	Q2PPJ7	RALGAPA2		0	0.204571	0.903014	-0.0521091	0.267249	0					0	0.412021	0.810854	0.47699	0.0696756							0		0.308296	0.683087		0.856934	1.68856		0.212441	0.00058492		0.168462	0.431337
P01009|A1AT_HUMAN Alpha-1-antitrypsin OS=Homo sapiens OX=9606 GN=SERPINA1 PE=1 SV=3	P01009	SERPINA1		0	-0.062122	0.768278	0.246649	1.0585	0	0.822413	0.914214	0.789618	0.132697	0	0.684885	0.90527	0.617576	0.568597	0	0.792692	0.135811	0.851686	0.0515997		0		0.559467	0.683087		0.680893	0.765742		0.626383	0.605203		0.452849	0.481736
P02788|TRFL_HUMAN Lactotransferrin OS=Homo sapiens OX=9606 GN=LTF PE=1 SV=6	P02788	LTF		0	0.137838	0.981873	0.300521	1.10551	0	2.54391	0.240375	0.527071	0.0409494	0	0.968627	2.20304	0.702248	0.801779	0	1.7905	0.472428	2.97465	0.122328		0		1.36022	0.683087		0.974428	0.388216		1.12612	0.0421795		0.517642	0.485088
P01743|HV146_HUMAN Immunoglobulin heavy variable 1-46 OS=Homo sapiens OX=9606 GN=IGHV1-46 PE=1 SV=2	P01743	IGHV1-46		0	-0.0523104	0.168095	-0.200554	0.498853	0	0.862747	0.259251	0.519281	-0.275145	0	0.655357	0.89066	0.758788	0.928488	0	0.717386	0.0211031	0.698643	-0.604345		0		0.545795	0.683087		0.334778	0.24841		0.444039	0.0868876		0.136963	0.0654928
Q96IV0|NGLY1_HUMAN Peptide-N(4)-(N-acetyl-beta-glucosaminyl)asparagine amidase OS=Homo sapiens OX=9606 GN=NGLY1 PE=1 SV=1	Q96IV0	NGLY1		0	0.173073	0.404269	0.0564141	0.168449	0	0.0409075	0.00835153	-0.0964679	0.210728	0	0.339832	0.490487	0.203057	0.0942928	0	0.329875	-0.00576043	0.15237	0.0489856		0		0.220922	0.683087		0.224337	0.245725		0.0788433	0.00058492		0.130614	0.657097
Q9UBM7|DHCR7_HUMAN 7-dehydrocholesterol reductase OS=Homo sapiens OX=9606 GN=DHCR7 PE=1 SV=1	Q9UBM7	DHCR7		0	0.0682429	0.135484	-0.0495385	0.120006	0	0.126455	0.0405382	-0.235781	0.039569	0	0.332975	0.239322	0.0906508	-0.106592	0	0.256526	-0.00630159	0.245992	0.0287297		0		0.19605	0.683087		0.10226	0.244194		0.0128307	0.00058492		0.0204283	0.0574457
P02751|FINC_HUMAN Fibronectin OS=Homo sapiens OX=9606 GN=FN1 PE=1 SV=4	P02751	FN1		0	0.0239623	0.29129	0.0109285	0.684545	0	0.735481	0.166813	0.115574	-0.108165	0	0.363932	1.07787	0.150334	0.232149	0	0.808913	-0.00871187	0.422763	-0.295965		0		0.483072	0.683087		0.381815	0.243011		0.1749	0.0136784		0.128141	0.109355
P59665|DEF1_HUMAN Neutrophil defensin 1 OS=Homo sapiens OX=9606 GN=DEFA1 PE=1 SV=1	P59665	DEFA1		0	0.0207914	0.944262	0.21463	1.01855	0	1.98003	0.0595233	0.0167693	0.0315332	0	0.905478	2.15294	0.389564	0.47754	0	1.38326	-0.0248753	2.11642	0.0166227		0		1.07239	0.683087		0.782962	0.241722		0.684346	0.00058492		0.386061	0.389225
O43676|NDUB3_HUMAN NADH dehydrogenase [ubiquinone] 1 beta subcomplex subunit 3 OS=Homo sapiens OX=9606 GN=NDUFB3 PE=1 SV=3	O43676	NDUFB3		0	0.386911	0.129161	0.578168	-0.087475	0	0.0149631	-0.243351	0.00867754	0.144307	0	0.388851	-0.188525	-0.0239078	-0.0834197	0	0.240522	-0.235437	0.0363762	-0.0630733		0		0.257812	0.683087		-0.134538	0.224606		0.149829	0.00058492		-0.0224153	0.0564892
K7ER74|K7ER74_HUMAN APOC4-APOC2 readthrough (NMD candidate) OS=Homo sapiens OX=9606 GN=APOC4-APOC2 PE=1 SV=1	K7ER74	APOC4-APOC2		0	0.158071	0.746328	0.10707	0.863493	0	0.537626	0.0795916	0.155364	-0.0306495	0	1.21459	1.4761	0.79185	0.589055	0	0.439077	-0.245006	0.355617	-0.38809		0		0.587342	0.683087		0.514254	0.211717		0.352475	0.102991		0.258452	0.197741
P62829|RL23_HUMAN 60S ribosomal protein L23 OS=Homo sapiens OX=9606 GN=RPL23 PE=1 SV=1	P62829	RPL23		0	-0.152175	-0.184517	-0.0980622	-0.211985	0	-0.648765	-0.106174	-0.211931	0.208218	0	-0.179132	-0.369209	0.00376744	-0.0995166	0	-0.285516	0.10524	-0.572099	0.0695496		0		-0.316397	0.683087		-0.138665	0.211717		-0.219581	0.00473085		-0.00843346	0.0125432
Q13867|BLMH_HUMAN Bleomycin hydrolase OS=Homo sapiens OX=9606 GN=BLMH PE=1 SV=1	Q13867	BLMH		0	0.168694	0.243467	0.154735	0.0372142	0	0.0743336	0.00448906	-0.237773	0.0823681	0	0.183854	0.219142	0.120595	0.110556	0	0.115856	-0.0419062	-0.0231478	0.00534121		0		0.135684	0.683087		0.106298	0.210384		0.00360214	0.00058492		0.0588698	0.342685
P02775|CXCL7_HUMAN Platelet basic protein OS=Homo sapiens OX=9606 GN=PPBP PE=1 SV=3	P02775	PPBP		0	0.144629	0.9444	0.101886	0.739252	0	1.25767	0.520334	0.405687	-0.181057	0	0.997107	2.87049	0.449928	0.470562	0	0.355661	-0.595008	-0.363611	-0.932354		0		0.688767	0.683087		0.935053	0.204663		0.148473	0.00058492		0.0241006	0.00832096
P08133|ANXA6_HUMAN Annexin A6 OS=Homo sapiens OX=9606 GN=ANXA6 PE=1 SV=3	P08133	ANXA6		0	-0.061064	-0.228284	-0.349539	-0.296676	0	-0.158164	0.00404892	-0.633899	-0.310972	0	-0.401956	-0.169674	-0.205792	-0.0467533	0	-0.356118	0.0320217	-0.277065	-0.0563588		0		-0.244326	0.683087		-0.0904718	0.201294		-0.366574	0.309774		-0.17769	0.543333
P37840|SYUA_HUMAN Alpha-synuclein OS=Homo sapiens OX=9606 GN=SNCA PE=1 SV=1	P37840	SNCA		0	0.0413823	2.04178	0.129671	0.889031	0	1.53045	0.595726	1.06602	-0.11668	0	1.3552	2.15463	0.960362	0.491798	0	0.6513	-1.15273	0.0794626	-1.384		0		0.894584	0.683087		0.909851	0.181718		0.558879	0.0952729		-0.0299635	0.00784357
J3QLS3|J3QLS3_HUMAN 28S ribosomal protein S7;mitochondrial OS=Homo sapiens OX=9606 GN=MRPS7 PE=1 SV=1	J3QLS3	MRPS7		0	0.267756	0.255589	-0.0101777	-0.0309581	0	0.0375138	0.0930878	-0.121249	0.0842087	0	0.186998	0.149518	0.195311	0.0946281	0	0.219553	-0.112098	0.120641	-0.014001		0		0.177955	0.683087		0.096524	0.181502		0.0461311	0.00058492		0.0334694	0.145775
A0A0J9YY99|A0A0J9YY99_HUMAN Uncharacterized protein (Fragment) OS=Homo sapiens OX=9606 PE=1 SV=1	A0A0J9YY99			0	-0.0289917	0.436842	-0.0482836	0.858604	0	0.705559	-0.343724	0.527916	-1.06417	0	0.997934	1.26218	0.728052	0.756003	0	0.616302	0.0184311	0.57357	-0.344408		0		0.572701	0.683087		0.343432	0.151847		0.445314	0.154402		0.0515066	0.0154293
P02743|SAMP_HUMAN Serum amyloid P-component OS=Homo sapiens OX=9606 GN=APCS PE=1 SV=2	P02743	APCS		0	0.173413	-0.216071	-0.339754	-0.69839	0	0.110127	-0.119143	-0.262148	-0.381368	0	0.553616	0.743277	0.619299	0.272941	0	0.652929	0.532285	0.678388	0.355572		0		0.372521	0.683087		0.235087	0.150781		0.173946	0.00058492		-0.112811	0.0722379
P08758|ANXA5_HUMAN Annexin A5 OS=Homo sapiens OX=9606 GN=ANXA5 PE=1 SV=2	P08758	ANXA5		0	-0.107313	-0.233652	-0.0750959	-0.142894	0	-0.379019	-0.0244508	-0.331528	-0.0657559	0	-0.132151	-0.24006	0.0407979	-0.051366	0	-0.527168	0.174199	-0.290591	0.352068		0		-0.286413	0.683087		-0.080991	0.109064		-0.164104	0.00473085		0.0230129	0.0271958
Q9Y3D2|MSRB2_HUMAN Methionine-R-sulfoxide reductase B2;mitochondrial OS=Homo sapiens OX=9606 GN=MSRB2 PE=1 SV=2	Q9Y3D2	MSRB2		0	0.242205	0.145728	0.155354	0.131337	0	0.0233636	0.00118313	-0.0519691	0.0933786	0	0.249257	0.105524	0.101354	0.128262	0	0.210483	-0.0886818	0.19929	0.11928		0		0.181327	0.683087		0.0409384	0.086911		0.101007	0.00058492		0.118064	0.817797
J3KNV4|J3KNV4_HUMAN Integrin alpha-7 OS=Homo sapiens OX=9606 GN=ITGA7 PE=1 SV=1	J3KNV4	ITGA7		0	-0.0143345	0.204629	-0.105013	0.0143924	0	0.446607	0.0747938	0.0759396	0.00511266	0	0.390148	0.350396	0.20042	0.230032	0	0.510979	-0.293419	0.298861	-0.183295		0		0.33335	0.683087		0.0841001	0.0823847		0.117552	0.00058492		0.0165604	0.0234689
Q9Y3D9|RT23_HUMAN 28S ribosomal protein S23;mitochondrial OS=Homo sapiens OX=9606 GN=MRPS23 PE=1 SV=2	Q9Y3D9	MRPS23		0	0.155714	0.0636307	0.0365134	0.0177153	0	0.0729159	-0.0926879	-0.126616	0.0669732	0	0.135163	0.0366038	0.117354	0.112336	0	0.173038	-0.104999	-0.00405448	0.124897		0		0.134208	0.683087		-0.024363	0.060053		0.00579928	0.00058492		0.0804805	0.483382
Q96GG9|DCNL1_HUMAN DCN1-like protein 1 OS=Homo sapiens OX=9606 GN=DCUN1D1 PE=1 SV=1	Q96GG9	DCUN1D1		0	0.0454583	0.0551529	0.0347753	-0.205958	0	0.148741	0.0815004	-0.0812489	0.14183	0	0.277965	-0.100933	0.0203945	0.0185856	0	0.279155	-0.0712537	0.385306	0.129794		0		0.18783	0.683087		-0.0088834	0.0231889		0.0898067	0.00058492		0.0210629	0.0345542
O60256|KPRB_HUMAN Phosphoribosyl pyrophosphate synthase-associated protein 2 OS=Homo sapiens OX=9606 GN=PRPSAP2 PE=1 SV=1	O60256	PRPSAP2		0	0.128024	0.0940369	0.00913872	-0.104127	0	0.166096	-0.00548806	-0.1136	0.162843	0	0.0733492	0.00269009	0.0874845	0.157029	0	0.269253	0.0557945	0.132361	0.000240681		0		0.159181	0.683087		0.0367583	0.141788		0.028846	0.00058492		0.0539963	0.150959
Q9NUT2|ABCB8_HUMAN ATP-binding cassette sub-family B member 8;mitochondrial OS=Homo sapiens OX=9606 GN=ABCB8 PE=1 SV=3	Q9NUT2	ABCB8		0	0.191668	0.318883	0.220318	-0.227529	0					0	0.319479	0.282704	0.302137	0.271011							0		0.255573	0.683087		0.300794	0.901923		0.261227	0.154402		0.0217409	0.0172753
P55072|TERA_HUMAN Transitional endoplasmic reticulum ATPase OS=Homo sapiens OX=9606 GN=VCP PE=1 SV=4	P55072	VCP		0	-0.145826	-0.167334	-0.237957	-0.202008	0	-0.11931	-0.0736644	-0.0215758	-0.323152	0	-0.176044	-0.179413	-0.102802	-0.0678939	0	-0.434652	-0.171267	-0.101784	-0.264758		0		-0.218958	0.683087		-0.14792	0.765742		-0.11603	0.00795531		-0.214453	0.79811
Q6PCE3|PGM2L_HUMAN Glucose 1;6-bisphosphate synthase OS=Homo sapiens OX=9606 GN=PGM2L1 PE=1 SV=3	Q6PCE3	PGM2L1		0	0.047845	0.194206	0.0277913	0.117717	0	0.19257	0.222789	-0.0339558	0.309696	0	0.147677	0.0534442	0.108304	0.264858	0	0.241543	0.154002	0.0537436	0.176803		0		0.157409	0.683087		0.15611	0.586412		0.0389708	0.00058492		0.217269	0.900496
Q9BSH4|TACO1_HUMAN Translational activator of cytochrome c oxidase 1 OS=Homo sapiens OX=9606 GN=TACO1 PE=1 SV=1	Q9BSH4	TACO1		0	0.10622	-0.0910991	-0.064824	-0.0571088	0	0.240135	-0.113582	-0.0681019	0.221294	0	0.118167	-0.064315	0.0651249	0.1156	0	0.10923	-0.169031	-0.0418128	0.32258		0		0.143438	0.683087		-0.109507	0.497327		-0.0274034	0.00058492		0.150591	0.417679
Q9NZD4|AHSP_HUMAN Alpha-hemoglobin-stabilizing protein OS=Homo sapiens OX=9606 GN=AHSP PE=1 SV=1	Q9NZD4	AHSP		0	-0.0662711	1.95688	-0.0606193	0.693668	0	1.5744	0.831966	1.13231	-0.139499	0	1.37549	2.25752	1.6642	0.36657	0	0.851633	-0.85797	0.283223	-0.880649		0		0.933814	0.683087		1.0471	0.231848		0.754781	0.0686033		0.0100226	0.00322507
K7N7A8|K7N7A8_HUMAN Uncharacterized protein (Fragment) OS=Homo sapiens OX=9606 PE=3 SV=2	K7N7A8			0	0.0424981	0.38331	0.00694583	0.161767	0	0.460331	-0.319616	-0.0387086	-0.3064	0	0.18334	0.333743	0.238755	0.0857466	0	0.369231	-0.273472	0.271803	-0.285084		0		0.26385	0.683087		0.0309911	0.0231889		0.119699	0.00058492		-0.0859924	0.134995
X6RAY8|X6RAY8_HUMAN 39S ribosomal protein L4;mitochondrial OS=Homo sapiens OX=9606 GN=MRPL4 PE=1 SV=1	X6RAY8	MRPL4		0	0.0948019	0.279495	-0.0310251	0.0277513	0	0.241417	0.26793	0.101146	0.360744	0	0.0826574	0.189873	0.0122129	0.189626	0	0.310573	0.2775	0.289609	0.531429		0		0.182362	0.683087		0.2537	1.46587		0.0929857	0.00058492		0.277387	0.599927
P01024|CO3_HUMAN Complement C3 OS=Homo sapiens OX=9606 GN=C3 PE=1 SV=2	P01024	C3		0	0.0704831	0.756741	0.0248946	0.996194	0	0.860311	0.369842	0.508178	-0.213488	0	1.18744	1.43922	0.676502	0.721908	0	0.395893	-0.00910216	0.387876	-0.376936		0		0.628532	0.683087		0.639176	0.332184		0.399363	0.159453		0.281919	0.17685
P61026|RAB10_HUMAN Ras-related protein Rab-10 OS=Homo sapiens OX=9606 GN=RAB10 PE=1 SV=1	P61026	RAB10		0	0.134464	-0.0279156	0.054225	-0.0265007	0	0.118643	0.0261736	-0.169306	0.00833069	0	0.0818243	0.0989445	0.22658	0.198487	0	0.222578	0.222977	0.0756661	0.415714		0		0.139377	0.683087		0.0800448	0.201294		0.0467913	0.00058492		0.149008	0.329798
Q9P0M6|H2AW_HUMAN Core histone macro-H2A.2 OS=Homo sapiens OX=9606 GN=H2AFY2 PE=1 SV=3	Q9P0M6	H2AFY2		0	0.102776	0.239571	0.344836	0.315236	0	0.232518	0.00547108	-0.0602239	0.119026	0	0.0790531	-0.0642587	0.087795	-0.0214754	0	0.320983	0.00454364	0.296927	0.0612732		0		0.183833	0.683087		0.0463317	0.0837745		0.167333	0.00473085		0.118515	0.359301
O75947|ATP5H_HUMAN ATP synthase subunit d;mitochondrial OS=Homo sapiens OX=9606 GN=ATP5H PE=1 SV=3	O75947	ATP5H		0	0.114828	0.00828167	0.317389	0.155227	0	0.181597	0.0076148	0.146753	-0.0179892	0	0.0969669	-0.129245	0.126464	-0.00248512	0	0.110201	0.0524027	-0.226398	-0.0490643		0		0.125898	0.683087		-0.0152365	0.0399448		0.091052	0.00058492		0.0214222	0.0637979
P18077|RL35A_HUMAN 60S ribosomal protein L35a OS=Homo sapiens OX=9606 GN=RPL35A PE=1 SV=2	P18077	RPL35A		0	-0.0768691	-0.165416	-0.0739958	-0.0820657	0	-0.358245	-0.024407	-0.394457	0.0122998	0	-0.142032	-0.141654	-0.000500331	-0.028373	0	-0.48994	0.233293	0.0249584	0.151394		0		-0.266772	0.683087		-0.0245458	0.0337411		-0.110999	0.00058492		0.0133138	0.0312227
P54289|CA2D1_HUMAN Voltage-dependent calcium channel subunit alpha-2/delta-1 OS=Homo sapiens OX=9606 GN=CACNA2D1 PE=1 SV=3	P54289	CACNA2D1		0	-0.0914902	-0.242725	-0.153318	-0.130541	0	-0.141506	-0.0211331	-0.265385	0.0638814	0	-0.104943	-0.214641	0.0708657	0.0418681	0	-0.144826	0.0670937	-0.222158	0.0600715		0		-0.120691	0.683087		-0.102851	0.201294		-0.142499	0.00473085		0.00881999	0.0206311
Q5VVQ6|OTU1_HUMAN Ubiquitin thioesterase OTU1 OS=Homo sapiens OX=9606 GN=YOD1 PE=1 SV=1	Q5VVQ6	YOD1		0	-0.0426375	0.37999	-0.243456	0.0765587	0	0.753165	0.142299	0.388745	-0.0783319	0	0.458819	0.555996	0.307582	0.120527	0	0.641222	-0.453897	0.223552	-0.504349		0		0.452642	0.683087		0.156097	0.0949362		0.169106	0.00058492		-0.0963987	0.128972
O43819|SCO2_HUMAN Protein SCO2 homolog;mitochondrial OS=Homo sapiens OX=9606 GN=SCO2 PE=1 SV=3	O43819	SCO2		0	0.187946	0.67047	-0.0585479	0.064594	0	0.200729	0.216489	0.0383612	0.216632	0	0.665651	0.870264	0.311069	0.236542	0	0.198131	0.0311322	0.0866374	0.394587		0		0.313114	0.683087		0.447089	0.389206		0.09438	0.00058492		0.228089	0.709505
Q96P70|IPO9_HUMAN Importin-9 OS=Homo sapiens OX=9606 GN=IPO9 PE=1 SV=3	Q96P70	IPO9		0	0.148254	0.358312	-0.141949	0.0139409	0	0.0545249	-0.0782722	-0.126656	-0.0593438	0	0.372009	0.513442	0.220601	0.212531	0	0.441305	-0.0213726	0.15392	0.0610951		0		0.254023	0.683087		0.193027	0.208036		0.026479	0.00058492		0.0570558	0.18504
P02042|HBD_HUMAN Hemoglobin subunit delta OS=Homo sapiens OX=9606 GN=HBD PE=1 SV=2	P02042	HBD		0	0.519097	2.18662	0.523978	0.871474	0	1.73986	0.597243	1.31366	-0.72285	0	1.9922	2.31126	0.798127	0.198628	0	0.180185	-1.53653	0.0627392	-1.89392		0		1.10784	0.683087		0.889649	0.151847		0.674627	0.154402		-0.386666	0.125586
Q15942|ZYX_HUMAN Zyxin OS=Homo sapiens OX=9606 GN=ZYX PE=1 SV=1	Q15942	ZYX		0	0.130976	-0.0576512	-0.130986	-0.0398586	0	0.213036	-0.0265514	-0.349052	-0.0430544	0	0.109101	0.491068	0.203601	0.0733824	0	0.454556	0.0921058	0.306831	0.0860507		0		0.226917	0.683087		0.124743	0.148548		0.00759835	0.00058492		0.01913	0.0666621
P30038|AL4A1_HUMAN Delta-1-pyrroline-5-carboxylate dehydrogenase;mitochondrial OS=Homo sapiens OX=9606 GN=ALDH4A1 PE=1 SV=3	P30038	ALDH4A1		0	0.0693708	0.0442329	0.0425657	0.0868021	0	0.179164	0.0605811	-0.160385	0.05179	0	0.14068	0.0285175	0.117299	0.105921	0	0.124237	-0.0751659	0.0377288	0.134772		0		0.128363	0.683087		0.0145414	0.0432402		0.00930235	0.00058492		0.0948215	0.618577
P07738|PMGE_HUMAN Bisphosphoglycerate mutase OS=Homo sapiens OX=9606 GN=BPGM PE=1 SV=2	P07738	BPGM		0	-0.00757151	1.08997	-0.116006	0.245734	0	0.866633	0.335262	0.4999	0.0191708	0	1.04986	1.3287	0.281007	0.190487	0	0.450525	-0.430865	0.494606	-0.377956		0		0.589863	0.683087		0.580765	0.2286		0.289877	0.0586894		0.0193591	0.0184942
Q9Y608|LRRF2_HUMAN Leucine-rich repeat flightless-interacting protein 2 OS=Homo sapiens OX=9606 GN=LRRFIP2 PE=1 SV=1	Q9Y608	LRRFIP2		0	-0.203001	-0.149004	-0.0624676	-0.139644	0					0	-0.232113	0.0124295	-0.112772	-0.0910232							0		-0.217557	0.683087		-0.0682874	0.133608		-0.0876196	0.00058492		-0.115334	0.442143
Q86UX7|URP2_HUMAN Fermitin family homolog 3 OS=Homo sapiens OX=9606 GN=FERMT3 PE=1 SV=1	Q86UX7	FERMT3		0	0.0820524	0.812119	0.0189282	0.346152	0	1.93511	0.164857	0.44125	-0.291209	0	0.669522	2.07174	1.06633	0.222308	0	1.20806	-0.147044	0.751841	-0.383252		0		0.973686	0.683087		0.725417	0.231848		0.569589	0.154402		-0.0265003	0.0191708
Q96DD0|LRC39_HUMAN Leucine-rich repeat-containing protein 39 OS=Homo sapiens OX=9606 GN=LRRC39 PE=1 SV=1	Q96DD0	LRRC39		0	0.131206	0.279076	0.385769	0.149713	0	0.12339	-0.0285007	-0.199787	0.15822	0	0.0727366	-0.0144038	-0.22064	-0.0620094	0	0.216028	-0.0811366	0.166215	0.0736045		0		0.13584	0.683087		0.0387586	0.0594093		0.0328894	0.00058492		0.079882	0.307348
Q5SSJ5|HP1B3_HUMAN Heterochromatin protein 1-binding protein 3 OS=Homo sapiens OX=9606 GN=HP1BP3 PE=1 SV=1	Q5SSJ5	HP1BP3		0	-0.213206	-0.0569902	-0.0928966	-0.00427257	0	-0.218468	-0.108271	-0.139995	0.186227	0	-0.060927	0.0770292	-0.251198	0.0579678	0	-0.484881	0.0388351	-0.0904387	0.149695		0		-0.24437	0.683087		-0.0123492	0.0302321		-0.143632	0.102991		0.0974043	0.431337
A0A2R8Y7X9|A0A2R8Y7X9_HUMAN Uncharacterized protein OS=Homo sapiens OX=9606 PE=3 SV=1	A0A2R8Y7X9			0	0.253174	1.68316	0.217946	0.689191	0	1.95864	1.14261	1.13553	0.453665	0	2.53188	3.13215	1.96098	0.951572	0	0.592743	-0.741518	0.142775	-0.943165		0		1.33411	0.683087		1.3041	0.245136		0.864308	0.0868876		0.287816	0.134995
C9JMB8|C9JMB8_HUMAN Dynamin-like 120 kDa protein;mitochondrial OS=Homo sapiens OX=9606 GN=OPA1 PE=1 SV=2	C9JMB8	OPA1							0	0.311203	-0.0131809	-0.176343	0.100831						0	0.576261	0.0274144	0.813312	0.190557		0		0.443732	0.683087		0.00711677	0.0139532		0.318485	0.00058492		0.145694	0.393851
Q6NUM9|RETST_HUMAN All-trans-retinol 13;14-reductase OS=Homo sapiens OX=9606 GN=RETSAT PE=1 SV=2	Q6NUM9	RETSAT		0	-0.0049755	0.0683033	-0.124714	0.00368359	0	0.248278	-0.0639162	-0.452996	-0.177861	0	0.297962	0.323978	0.310391	0.317163	0	0.349846	0.160943	0.207908	0.247483		0		0.222778	0.683087		0.122327	0.215561		-0.0148529	0.00058492		0.0976172	0.175203
P35611|ADDA_HUMAN Alpha-adducin OS=Homo sapiens OX=9606 GN=ADD1 PE=1 SV=2	P35611	ADD1		0	-0.0262257	0.427063	0.0462258	0.0614514	0	0.40233	-0.111754	0.00024851	-0.110822	0	0.422758	0.697097	0.239275	0.0975033	0	0.651636	-0.196918	0.452322	0.0196999		0		0.362625	0.683087		0.203872	0.142435		0.184518	0.00473085		0.016958	0.0469063
P62701|RS4X_HUMAN 40S ribosomal protein S4;X isoform OS=Homo sapiens OX=9606 GN=RPS4X PE=1 SV=2	P62701	RPS4X		0	-0.198789	0.0154417	-0.31639	-0.208906	0	-0.533743	-0.0764993	-0.469967	-0.00890903	0	-0.384584	-0.0352914	-0.287668	-0.0866032	0	-0.0353259	0.264327	-0.213364	0.3368		0		-0.288111	0.683087		0.0419944	0.0680386		-0.321847	0.605203		0.00809537	0.00855683
H3BN98|H3BN98_HUMAN Uncharacterized protein (Fragment) OS=Homo sapiens OX=9606 PE=4 SV=2	H3BN98								0	0.263731	-0.192347	-0.258665	0.167631						0	0.382709	0.0749578	0.314363	0.135144		0		0.32322	0.683087		-0.0586946	0.0592201		0.0278489	0.00058492		0.151387	0.449515
P68400|CSK21_HUMAN Casein kinase II subunit alpha OS=Homo sapiens OX=9606 GN=CSNK2A1 PE=1 SV=1	P68400	CSNK2A1		0	0.117859	0.000416073	0.0710664	-0.000189056	0	0.462391	0.167267	0.0774274	0.0886685	0	0.0777788	-0.0342694	0.087418	-0.0170387	0	0.458182	-0.101266	0.526816	0.190535		0		0.279053	0.683087		0.00803697	0.0168695		0.190682	0.00473085		0.0654939	0.261168
Q15404|RSU1_HUMAN Ras suppressor protein 1 OS=Homo sapiens OX=9606 GN=RSU1 PE=1 SV=3	Q15404	RSU1		0	0.0682056	0.115447	-0.0226554	0.0384681	0	0.118792	-0.0519915	-0.235624	-0.0142993	0	0.276855	0.232939	0.0325244	0.0618186	0	0.403129	-0.0388224	0.225504	0.0489957		0		0.216745	0.683087		0.0643932	0.133223		-6.29e-05	3.56394e-06		0.0337458	0.198142
Q9NRV9|HEBP1_HUMAN Heme-binding protein 1 OS=Homo sapiens OX=9606 GN=HEBP1 PE=1 SV=1	Q9NRV9	HEBP1		0	0.0536851	0.357235	0.019842	0.301079	0	0.132509	0.0999709	-0.0218873	0.114355	0	0.423857	0.528897	0.313873	0.227048	0	0.388231	-0.0371844	0.171673	0.130778		0		0.249571	0.683087		0.23723	0.249067		0.120875	0.00058492		0.193315	0.821064
A0A087WT59|A0A087WT59_HUMAN Transthyretin OS=Homo sapiens OX=9606 GN=TTR PE=1 SV=1	A0A087WT59	TTR		0	0.120192	0.786007	0.17412	0.888872	0	0.607822	0.199295	0.224556	-0.0185378	0	0.557967	0.875394	-0.221111	0.227536	0	0.103158	0.201769	-0.566183	-0.312071		0		0.347285	0.683087		0.515617	0.497327		-0.0971546	0.00058492		0.19645	0.155736
P02753|RET4_HUMAN Retinol-binding protein 4 OS=Homo sapiens OX=9606 GN=RBP4 PE=1 SV=3	P02753	RBP4		0	-0.0602978	0.232995	-0.187357	0.498353	0	0.479457	0.0631956	0.158827	-0.0118746	0	0.475803	0.451077	0.156047	0.233726	0	0.61952	0.149016	0.534833	0.0704764		0		0.37862	0.683087		0.224071	0.435741		0.165588	0.00058492		0.19767	0.408522
P25325|THTM_HUMAN 3-mercaptopyruvate sulfurtransferase OS=Homo sapiens OX=9606 GN=MPST PE=1 SV=3	P25325	MPST		0	0.121918	0.239866	0.142829	0.166473	0	0.0499953	-0.0783546	-0.173323	0.0169018	0	0.26856	0.195955	0.0966956	0.118762	0	0.332905	0.121965	0.191366	0.208387		0		0.193345	0.683087		0.119858	0.242179		0.0643919	0.00058492		0.127631	0.597864
P22352|GPX3_HUMAN Glutathione peroxidase 3 OS=Homo sapiens OX=9606 GN=GPX3 PE=1 SV=2	P22352	GPX3		0	0.175865	0.298355	0.056071	0.017789	0	0.103696	-0.229957	-0.261338	-0.0097398	0	0.156019	0.3396	0.0201741	0.166951	0	0.462562	0.461717	0.316646	0.336154		0		0.224535	0.683087		0.217429	0.215561		0.0328882	0.00058492		0.127788	0.353216
H0YKJ4|H0YKJ4_HUMAN Tropomyosin 1 (Alpha);isoform CRA_b OS=Homo sapiens OX=9606 GN=TPM1 PE=1 SV=2	H0YKJ4	TPM1		0	0.179061	-0.222213	-0.517236	-0.650791	0	0.760239	-0.179032	-0.230105	-0.245581	0	0.0884036	0.274809	0.132608	-0.146963	0	0.664664	-0.219757	0.450397	-0.268753		0		0.423092	0.683087		-0.0865482	0.0924955		-0.0410841	0.00058492		-0.328022	0.690801
A3KMH1|VWA8_HUMAN von Willebrand factor A domain-containing protein 8 OS=Homo sapiens OX=9606 GN=VWA8 PE=1 SV=2	A3KMH1	VWA8		0	0.0676646	-0.0330733	0.154131	0.027965	0	0.221158	0.0516172	-0.061923	0.135789	0	0.0896375	-0.0899133	0.106152	0.16653	0	0.235596	-0.0192556	0.228421	0.137692		0		0.153514	0.683087		-0.0226562	0.069797		0.106695	0.00058492		0.116994	0.635252
Q9UH62|ARMX3_HUMAN Armadillo repeat-containing X-linked protein 3 OS=Homo sapiens OX=9606 GN=ARMCX3 PE=1 SV=1	Q9UH62	ARMCX3		0	0.185129	0.307402	-0.0629755	-0.0249609	0					0	0.248946	0.273174	0.0602705	-0.0142791							0		0.217038	0.683087		0.290288	0.874707		-0.00135246	0.0001404		-0.01962	0.0571179
P63167|DYL1_HUMAN Dynein light chain 1;cytoplasmic OS=Homo sapiens OX=9606 GN=DYNLL1 PE=1 SV=1	P63167	DYNLL1							0	0.260909	0.132434	-0.250196	0.19462						0	0.320345	-0.0747539	0.204877	-0.0981271		0		0.290627	0.683087		0.0288398	0.0337411		-0.0226598	0.00058492		0.0482466	0.0549279
Q99808|S29A1_HUMAN Equilibrative nucleoside transporter 1 OS=Homo sapiens OX=9606 GN=SLC29A1 PE=1 SV=3	Q99808	SLC29A1		0	0.174424	0.647119	0.158559	0.24163	0					0	0.299473	0.51085	0.380468	0.208926							0		0.236949	0.683087		0.578984	1.29339		0.269514	0.0952729		0.225278	0.770583
P09874|PARP1_HUMAN Poly [ADP-ribose] polymerase 1 OS=Homo sapiens OX=9606 GN=PARP1 PE=1 SV=4	P09874	PARP1		0	0.0539255	0.079246	0.0227344	-0.0140091	0	0.142145	-0.0173615	-0.205993	0.0700886	0	0.316957	0.347706	0.145727	0.270289	0	0.17217	-0.0797742	0.12551	0.0956232		0		0.171299	0.683087		0.082454	0.124989		0.0219948	0.00058492		0.105498	0.372686
P20042|IF2B_HUMAN Eukaryotic translation initiation factor 2 subunit 2 OS=Homo sapiens OX=9606 GN=EIF2S2 PE=1 SV=2	P20042	EIF2S2		0	0.0716768	0.0566258	0.0757531	0.120297	0	0.133061	-0.02265	-0.247685	0.0683514	0	0.112918	-0.0673423	0.00247595	0.133569	0	0.22849	-1.07e-06	0.200943	0.0825724		0		0.136537	0.683087		-0.0083419	0.0279045		0.00787197	0.00058492		0.101197	0.673108
Q9GZP4|PITH1_HUMAN PITH domain-containing protein 1 OS=Homo sapiens OX=9606 GN=PITHD1 PE=1 SV=1	Q9GZP4	PITHD1		0	0.0647068	0.456714	0.0417119	0.108415	0	0.964158	0.476468	0.742269	0.249595	0	0.263431	0.375136	0.154027	0.0961124	0	0.700479	-0.134787	0.277623	-0.227861		0		0.498194	0.683087		0.293383	0.303209		0.303908	0.0550956		0.0565656	0.0957416
P62280|RS11_HUMAN 40S ribosomal protein S11 OS=Homo sapiens OX=9606 GN=RPS11 PE=1 SV=3	P62280	RPS11		0	-0.0834845	-0.235117	-0.101127	-0.193588	0	-0.840095	-0.0143768	-0.134241	-0.215791	0	-0.232389	-0.465177	-0.0243905	-0.0758085	0	-0.964575	0.0846819	-1.02171	0.0426452		0		-0.530136	0.683087		-0.157497	0.197321		-0.320366	0.00058492		-0.110635	0.389225
Q9UHD1|CHRD1_HUMAN Cysteine and histidine-rich domain-containing protein 1 OS=Homo sapiens OX=9606 GN=CHORDC1 PE=1 SV=2	Q9UHD1	CHORDC1		0	0.0738814	-0.125161	0.0599939	0.0816147	0	0.321222	0.147739	0.115483	0.175392	0	0.101594	-0.152749	0.089823	-0.118573	0	0.423683	0.053331	0.438063	0.00272652		0		0.230095	0.683087		-0.0192102	0.0314508		0.175841	0.0136784		0.0352901	0.0889513
Q5JPH6|SYEM_HUMAN Probable glutamate--tRNA ligase;mitochondrial OS=Homo sapiens OX=9606 GN=EARS2 PE=1 SV=2	Q5JPH6	EARS2		0	0.0604712	-0.0481533	-0.139908	-0.0342376	0	0.121181	0.103909	-0.0294088	0.213242	0	0.149514	0.120296	0.165723	0.248036	0	0.2544	0.056339	0.198626	0.409821		0		0.146391	0.683087		0.0580977	0.181689		0.0487582	0.00058492		0.209215	0.527964
O76003|GLRX3_HUMAN Glutaredoxin-3 OS=Homo sapiens OX=9606 GN=GLRX3 PE=1 SV=2	O76003	GLRX3		0	0.0110312	0.122621	-0.124591	-0.0308888	0	0.225483	0.130104	-0.0860349	0.154884	0	0.209109	0.169593	0.125617	0.120563	0	0.350026	-0.123553	0.362312	-0.0201388		0		0.198912	0.683087		0.0746914	0.153201		0.0693257	0.00058492		0.0561049	0.211914
Q6GMV3|PTRD1_HUMAN Putative peptidyl-tRNA hydrolase PTRHD1 OS=Homo sapiens OX=9606 GN=PTRHD1 PE=1 SV=1	Q6GMV3	PTRHD1		0	0.0135647	-0.160882	-0.155704	-0.194596	0	-0.384407	-0.290749	-0.43849	-0.290548	0	-0.337668	-0.238822	-0.17122	-0.153867	0	-0.237273	-0.166061	0.202803	0.232596		0		-0.236446	0.683087		-0.214128	1.07383		-0.140653	0.00058492		-0.101604	0.182224
Q9Y265|RUVB1_HUMAN RuvB-like 1 OS=Homo sapiens OX=9606 GN=RUVBL1 PE=1 SV=1	Q9Y265	RUVBL1		0	-0.000919709	0.365751	-0.041979	0.0523083	0	0.197562	0.0532275	-0.171409	0.0985048	0	0.363133	0.404102	0.439797	0.287553	0	0.352538	0.0871196	0.241988	0.0631674		0		0.228078	0.683087		0.22755	0.406399		0.117099	0.00058492		0.125383	0.483628
P17612|KAPCA_HUMAN cAMP-dependent protein kinase catalytic subunit alpha OS=Homo sapiens OX=9606 GN=PRKACA PE=1 SV=2	P17612	PRKACA		0	0.0117559	0.00953914	0.236686	0.0453403	0	0.325578	0.00923262	0.0583606	0.221355	0	0.171719	0.00510175	-0.0213203	0.0385995	0	0.276081	0.166388	0.125586	0.4115		0		0.196283	0.683087		0.0475655	0.141986		0.0998282	0.00058492		0.179199	0.464398
Q9P032|NDUF4_HUMAN NADH dehydrogenase [ubiquinone] 1 alpha subcomplex assembly factor 4 OS=Homo sapiens OX=9606 GN=NDUFAF4 PE=1 SV=1	Q9P032	NDUFAF4		0	0.304523	0.052137	0.239509	0.212627	0	0.00554438	0.0515581	-0.170797	0.143088	0	0.188243	-0.041956	0.159916	0.212029	0	0.264587	0.0755701	0.198141	0.346057		0		0.190724	0.683087		0.0343273	0.124989		0.106692	0.00058492		0.22845	0.900496
P62979|RS27A_HUMAN Ubiquitin-40S ribosomal protein S27a OS=Homo sapiens OX=9606 GN=RPS27A PE=1 SV=2	P62979	RPS27A		0	-0.20344	-0.175094	-0.147839	-0.287517	0	-0.0605071	0.0289106	-0.644547	-0.0895937	0	-0.106894	-0.114454	0.0339505	-0.138653	0	-0.150706	-0.23406	0.175597	-0.0973276		0		-0.130386	0.683087		-0.123674	0.26573		-0.14571	0.00058492		-0.153273	0.671724
H0Y2S9|H0Y2S9_HUMAN Myosin phosphatase Rho-interacting protein (Fragment) OS=Homo sapiens OX=9606 GN=MPRIP PE=1 SV=3	H0Y2S9	MPRIP		0	-0.250428	0.0412124	0.166803	0.0684672	0					0	-0.176658	-0.00780342	-0.295378	-0.250038							0		-0.213543	0.683087		0.0167045	0.0399448		-0.0642873	0.00058492		-0.0907855	0.147988
Q8TCS8|PNPT1_HUMAN Polyribonucleotide nucleotidyltransferase 1;mitochondrial OS=Homo sapiens OX=9606 GN=PNPT1 PE=1 SV=2	Q8TCS8	PNPT1		0	0.254227	0.0356895	0.220823	0.102981	0	0.078053	0.0464156	-0.14239	0.121784	0	0.105104	-0.0544313	0.0397858	0.110317	0	0.131476	-0.0492807	0.214538	0.192562		0		0.142215	0.683087		-0.00540172	0.0176436		0.0831893	0.00058492		0.131911	0.80052
A0A0A0MTI5|A0A0A0MTI5_HUMAN Acyl-CoA-binding protein OS=Homo sapiens OX=9606 GN=DBI PE=1 SV=1	A0A0A0MTI5	DBI		0	0.0157997	-0.220506	0.444659	0.241878	0	-0.279204	-0.0181707	-0.477964	-0.0759065	0	-0.277323	-0.622452	-0.777389	-0.843125	0	-0.260386	-0.671557	-0.150587	0.110746		0		-0.200278	0.683087		-0.383172	0.409241		-0.24032	0.00058492		-0.141602	0.106322
Q13618|CUL3_HUMAN Cullin-3 OS=Homo sapiens OX=9606 GN=CUL3 PE=1 SV=2	Q13618	CUL3		0	0.0406929	-0.0747973	-0.0096999	0.118805	0	0.139477	0.0790455	-0.174912	0.0312885	0	0.218507	0.0889829	0.205011	0.183902	0	0.350348	0.0268612	0.269397	0.133122		0		0.187256	0.683087		0.0300231	0.0837745		0.0724489	0.00058492		0.116779	0.618577
Q9UM11|FZR1_HUMAN Fizzy-related protein homolog OS=Homo sapiens OX=9606 GN=FZR1 PE=1 SV=2	Q9UM11	FZR1		0	0.166793	0.642855	0.137475	0.285801	0					0	0.346998	0.525143	-0.0265738	0.107082							0		0.256896	0.683087		0.583999	1.31329		0.0554507	0.00058492		0.196441	0.526716
P61225|RAP2B_HUMAN Ras-related protein Rap-2b OS=Homo sapiens OX=9606 GN=RAP2B PE=1 SV=1	P61225	RAP2B							0	0.327504	-0.17982	-0.209766	-0.106247						0	0.696321	-0.250527	0.442099	-0.0855127		0		0.511913	0.683087		-0.215174	0.406399		0.116167	0.00058492		-0.09588	0.298987
Q9NW15|ANO10_HUMAN Anoctamin-10 OS=Homo sapiens OX=9606 GN=ANO10 PE=1 SV=2	Q9NW15	ANO10		0	0.180096	0.38697	0.235976	0.174429	0	0.176898	0.10419	-0.169093	-2.13885	0	0.0214121	-0.0192835	0.0229851	0.1278	0	0.197319	-0.0376562	0.264693	0.182046		0		0.143931	0.683087		0.108555	0.163535		0.0886404	0.00058492		-0.413644	0.146228
Q92552|RT27_HUMAN 28S ribosomal protein S27;mitochondrial OS=Homo sapiens OX=9606 GN=MRPS27 PE=1 SV=3	Q92552	MRPS27		0	0.0565703	-0.0587417	-0.0329828	-0.046555	0	0.327084	0.232016	-0.0525916	0.169809	0	0.11434	-0.0878612	0.0749546	0.0871012	0	0.195952	0.0421048	0.343092	0.162083		0		0.173486	0.683087		0.0318795	0.0556469		0.0831181	0.00058492		0.0931096	0.372686
A0A087WWU8|A0A087WWU8_HUMAN Tropomyosin alpha-3 chain OS=Homo sapiens OX=9606 GN=TPM3 PE=1 SV=1	A0A087WWU8	TPM3		0	0.0162732	0.144843	-0.192594	-0.100406	0	0.569326	-0.315114	-0.187261	-0.0769832	0	0.248841	0.582906	0.0600538	0.0752771	0	0.763435	-0.103788	0.788234	0.215544		0		0.399468	0.683087		0.0772119	0.0556469		0.117108	0.00058492		0.0283578	0.0572926
P78371|TCPB_HUMAN T-complex protein 1 subunit beta OS=Homo sapiens OX=9606 GN=CCT2 PE=1 SV=4	P78371	CCT2		0	0.172287	0.12588	0.126145	0.0737851	0	0.18484	0.0172879	-0.066892	0.114097	0	0.0389499	-0.0597827	0.0321372	-0.046178	0	0.377162	0.119192	0.284645	0.237382		0		0.19331	0.683087		0.0506443	0.141576		0.0940089	0.00058492		0.0947713	0.333864
Q3SXM5|HSDL1_HUMAN Inactive hydroxysteroid dehydrogenase-like protein 1 OS=Homo sapiens OX=9606 GN=HSDL1 PE=1 SV=3	Q3SXM5	HSDL1		0	0.243635	0.0578479	0.363367	0.694613	0	-0.00935841	-0.0114498	-0.135553	0.19228	0	0.249145	-0.116643	0.223992	0.252278	0	0.247753	-0.00351599	0.271649	0.157731		0		0.182794	0.683087		-0.0184401	0.0537563		0.180864	0.00338476		0.324225	0.618153
P11217|PYGM_HUMAN Glycogen phosphorylase;muscle form OS=Homo sapiens OX=9606 GN=PYGM PE=1 SV=6	P11217	PYGM		0	-0.513639	-0.333572	-0.388976	-0.289313	0	-0.0932538	0.0334677	-0.145493	-0.182798	0	-0.161078	-0.242427	0.238269	0.0285788	0	-0.195624	0.474241	0.0602119	0.206988		0		-0.240899	0.683087		-0.0170724	0.0121563		-0.0589969	0.00058492		-0.0591362	0.0899226
Q10589|BST2_HUMAN Bone marrow stromal antigen 2 OS=Homo sapiens OX=9606 GN=BST2 PE=1 SV=1	Q10589	BST2		0	0.395891	0.560469	0.560486	0.577657	0					0	0.167498	0.0928516	-0.131624	0.0722084							0		0.281694	0.683087		0.32666	0.249067		0.214431	0.00058492		0.324933	0.40386
P35241|RADI_HUMAN Radixin OS=Homo sapiens OX=9606 GN=RDX PE=1 SV=1	P35241	RDX		0	-0.0432504	-0.21312	-0.347346	-0.285852	0	-0.278498	0.0721295	-0.3576	-0.154751	0	-0.148659	0.0117357	-0.246956	-0.308561	0	-0.147295	0.141871	0.0846803	0.227131		0		-0.154425	0.683087		0.00315386	0.00406427		-0.216806	0.0495718		-0.130508	0.229688
P00738|HPT_HUMAN Haptoglobin OS=Homo sapiens OX=9606 GN=HP PE=1 SV=1	P00738	HP		0	0.149679	0.849097	0.0843974	1.02592	0	0.586944	-0.530886	0.594279	-1.08769	0	1.74688	2.11666	0.912692	1.06755	0	0.667385	-0.807478	0.215185	-1.17713		0		0.787721	0.683087		0.406847	0.0837745		0.451639	0.136472		-0.0428363	0.00885696
P01709|LV208_HUMAN Immunoglobulin lambda variable 2-8 OS=Homo sapiens OX=9606 GN=IGLV2-8 PE=1 SV=2	P01709	IGLV2-8		0	-0.171682	0.562907	-0.431581	0.691122	0	0.971729	0.370152	0.594334	-0.14808	0	1.07965	1.385	0.88407	0.779526	0	0.780121	0.206782	0.803554	-0.279252		0		0.664955	0.683087		0.63121	0.409241		0.462594	0.00360751		0.260829	0.20767
P26583|HMGB2_HUMAN High mobility group protein B2 OS=Homo sapiens OX=9606 GN=HMGB2 PE=1 SV=2	P26583	HMGB2		0	0.254116	0.00661003	0.257017	-0.0875293	0	1.12186	0.0311876	0.031482	0.0229444	0	0.0725191	0.525227	0.0323926	0.0325756	0	0.851078	0.217498	1.40031	0.634181		0		0.574892	0.683087		0.195131	0.243011		0.430301	0.00058492		0.150543	0.198372
P21333|FLNA_HUMAN Filamin-A OS=Homo sapiens OX=9606 GN=FLNA PE=1 SV=4	P21333	FLNA		0	0.167428	0.0185002	0.24927	-0.0213572	0	0.185757	0.342536	-0.501027	-0.375333	0	0.0913388	0.585606	0.0410433	0.0326336	0	0.515976	-0.0564061	0.263376	0.24813		0		0.240125	0.683087		0.222559	0.231848		0.0131655	0.00058492		-0.0289817	0.0302098
I3L4N8|I3L4N8_HUMAN Actin;cytoplasmic 2 (Fragment) OS=Homo sapiens OX=9606 GN=ACTG1 PE=1 SV=8	I3L4N8	ACTG1		0	0.00922003	0.0972154	-0.256123	-0.0849263	0	0.394787	-0.176459	-0.406164	-0.0127637	0	0.44248	1.01956	-0.274817	0.0320996	0	0.16968	-0.265913	0.0149468	-0.266033		0		0.254042	0.683087		0.1686	0.0782333		-0.230539	0.112029		-0.0829058	0.261544
Q9H078|CLPB_HUMAN Caseinolytic peptidase B protein homolog OS=Homo sapiens OX=9606 GN=CLPB PE=1 SV=1	Q9H078	CLPB		0	0.138341	-0.00172733	0.12942	0.108643	0	0.112842	0.097503	-0.185352	0.143429	0	0.0628841	-0.0982087	0.128562	0.226858	0	0.144691	-0.070739	0.284693	0.132991		0		0.114689	0.683087		-0.018293	0.0445897		0.0893308	0.00058492		0.15298	0.839967
Q92665|RT31_HUMAN 28S ribosomal protein S31;mitochondrial OS=Homo sapiens OX=9606 GN=MRPS31 PE=1 SV=3	Q92665	MRPS31		0	0.310494	0.0887175	-0.0821897	-0.0259118	0	0.0691726	-0.0305157	-0.0803254	0.225532	0	0.139417	0.0607933	0.00729793	0.151013	0	0.120491	-0.1892	0.036819	0.171508		0		0.159894	0.683087		-0.0175511	0.0332945		-0.0295995	0.00058492		0.130535	0.503036
Q4G0N4|NAKD2_HUMAN NAD kinase 2;mitochondrial OS=Homo sapiens OX=9606 GN=NADK2 PE=1 SV=2	Q4G0N4	NADK2		0	0.102469	1.27088	0.343465	0.61594	0	0.870566	0.400428	0.502645	-0.144817	0	1.46034	1.95185	0.17618	0.650621	0	0.343255	-1.09109	-0.162717	-0.921655		0		0.694158	0.683087		0.633016	0.148548		0.214893	0.00058492		0.0500223	0.0184942
Q9Y3L5|RAP2C_HUMAN Ras-related protein Rap-2c OS=Homo sapiens OX=9606 GN=RAP2C PE=1 SV=1	Q9Y3L5	RAP2C							0	0.316958	0.212655	0.0805859	0.0262107						0	0.238839	-0.0908678	0.421108	0.184545		0		0.277899	0.683087		0.0608934	0.0556469		0.250847	0.00058492		0.105378	0.234125
Q14249|NUCG_HUMAN Endonuclease G;mitochondrial OS=Homo sapiens OX=9606 GN=ENDOG PE=1 SV=4	Q14249	ENDOG		0	0.105062	0.137289	-0.0736231	-0.0774977	0	0.111638	-0.0382543	-0.250686	-0.0419107	0	0.194287	0.168891	0.100939	0.123877	0	0.0724292	0.24396	0.131249	0.0659501		0		0.120854	0.683087		0.127971	0.259656		-0.0230302	0.00058492		0.0176046	0.0476455
A0A286YEY1|A0A286YEY1_HUMAN Immunoglobulin heavy constant alpha 1 (Fragment) OS=Homo sapiens OX=9606 GN=IGHA1 PE=1 SV=1	A0A286YEY1	IGHA1		0	0.0940092	0.719797	0.0816396	0.966263	0	0.633766	0.405537	0.465148	-0.337842	0	1.37849	1.86203	0.896005	0.76025	0	0.404224	-0.232707	0.139192	-0.431111		0		0.627622	0.683087		0.688665	0.243011		0.395496	0.0868876		0.23939	0.128918
P46109|CRKL_HUMAN Crk-like protein OS=Homo sapiens OX=9606 GN=CRKL PE=1 SV=1	P46109	CRKL		0	0.822358	0.412767	0.698705	-0.0301674	0	0.0486471	0.0102736	-0.124692	0.150778	0	0.312499	-0.326563	0.241717	-0.63739	0	0.333913	0.121689	0.12745	0.153118		0		0.379354	0.683087		0.0545418	0.0472263		0.235795	0.00058492		-0.0909153	0.0838125
Q9P0P0|RN181_HUMAN E3 ubiquitin-protein ligase RNF181 OS=Homo sapiens OX=9606 GN=RNF181 PE=1 SV=1	Q9P0P0	RNF181		0	0.236151	0.281234	0.304993	0.22393	0	-0.0208379	0.0806786	-0.0379968	0.173662	0	0.255061	0.205507	0.145223	0.370082	0	0.340199	0.218227	0.286303	0.332667		0		0.202643	0.683087		0.196412	0.772844		0.174631	0.040084		0.275085	1.00298
Q96S44|PRPK_HUMAN EKC/KEOPS complex subunit TP53RK OS=Homo sapiens OX=9606 GN=TP53RK PE=1 SV=2	Q96S44	TP53RK		0	0.228771	0.330841	0.0483997	0.0358573	0					0	0.169935	0.122393	0.13648	-0.0603571							0		0.199353	0.683087		0.226617	0.389206		0.0924401	0.00058492		-0.0122499	0.0247751
P00734|THRB_HUMAN Prothrombin OS=Homo sapiens OX=9606 GN=F2 PE=1 SV=2	P00734	F2		0	0.0797486	0.364725	0.0583074	0.564985	0	0.757024	0.24018	0.456696	-0.128633	0	0.483522	0.745151	0.291386	0.332794	0	0.151513	0.0161509	-0.118409	-0.396338		0		0.367952	0.683087		0.341552	0.382233		0.171995	0.00058492		0.0932021	0.0694307
Q13630|FCL_HUMAN GDP-L-fucose synthase OS=Homo sapiens OX=9606 GN=TSTA3 PE=1 SV=1	Q13630	TSTA3		0	-0.0157564	1.13821	-0.157805	0.42467	0	0.243963	0.154275	-0.0398579	-0.00687634	0	0.660987	1.13507	0.708717	0.153384	0	0.507226	0.0386296	0.56986	0.144201		0		0.349105	0.683087		0.616545	0.324847		0.270229	0.00058492		0.178845	0.456923
A0A1C7CYX9|A0A1C7CYX9_HUMAN Dihydropyrimidinase-related protein 2 OS=Homo sapiens OX=9606 GN=DPYSL2 PE=1 SV=1	A0A1C7CYX9	DPYSL2		0	-0.216578	-0.207993	-0.264282	-0.0633183	0	-0.224777	-0.392036	-0.459845	0.075528	0	0.00210955	0.00133418	0.0223456	0.0418282	0	-0.374287	-0.118832	-0.100803	-0.100497		0		-0.203383	0.683087		-0.179382	0.317036		-0.200646	0.0187592		-0.0116148	0.0302098
P30626|SORCN_HUMAN Sorcin OS=Homo sapiens OX=9606 GN=SRI PE=1 SV=1	P30626	SRI		0	0.0340512	0.30272	0.00754664	0.136066	0	0.218067	0.051579	-0.00043455	-0.0282026	0	0.347012	0.432391	0.152385	0.0898487	0	0.661799	0.0108489	0.22774	-0.017863		0		0.315232	0.683087		0.199385	0.259656		0.0968093	0.00058492		0.0449624	0.184726
O60343|TBCD4_HUMAN TBC1 domain family member 4 OS=Homo sapiens OX=9606 GN=TBC1D4 PE=1 SV=2	O60343	TBC1D4		0	0.0606891	0.0544052	-0.0576215	0.0134616	0	0.560065	0.0351969	-0.229656	0.176482	0	0.120828	0.0553702	0.0429909	-0.0614573	0	0.372607	0.243384	0.31461	0.245384		0		0.278547	0.683087		0.0970892	0.24524		0.0175808	0.00058492		0.0934676	0.27563
Q16853|AOC3_HUMAN Membrane primary amine oxidase OS=Homo sapiens OX=9606 GN=AOC3 PE=1 SV=3	Q16853	AOC3		0	0.0656473	-0.0358812	0.0811814	0.195896	0	0.223061	0.493057	-0.0207093	0.235889	0	0.16152	0.0610758	0.183949	0.181367	0	0.520401	0.22759	0.376479	0.951342		0		0.242658	0.683087		0.18646	0.242179		0.155225	0.00473085		0.391124	0.503036
Q9H444|CHM4B_HUMAN Charged multivesicular body protein 4b OS=Homo sapiens OX=9606 GN=CHMP4B PE=1 SV=1	Q9H444	CHMP4B		0	-0.0446387	-0.211759	-0.119064	-0.117249	0	-0.246761	-0.074627	-0.358942	-0.0141899	0	-0.337972	-0.13886	-0.0336787	-0.0179717	0	-0.739468	0.0932715	-0.536371	-0.0410778		0		-0.34221	0.683087		-0.0829937	0.179902		-0.262014	0.091063		-0.0476222	0.265369
Q9Y291|RT33_HUMAN 28S ribosomal protein S33;mitochondrial OS=Homo sapiens OX=9606 GN=MRPS33 PE=1 SV=1	Q9Y291	MRPS33		0	0.226858	0.217805	0.152797	0.125987	0	0.0216911	0.0444076	-0.0885645	0.126699	0	0.160034	-0.0320209	0.0958693	0.0648525	0	0.158652	0.0307599	0.203455	0.209286		0		0.141809	0.683087		0.0652378	0.162951		0.0908893	0.00058492		0.131706	0.707884
O43707|ACTN4_HUMAN Alpha-actinin-4 OS=Homo sapiens OX=9606 GN=ACTN4 PE=1 SV=2	O43707	ACTN4		0	0.10498	-0.0418558	0.00576262	0.0256374	0	0.292677	0.136803	-0.321452	-0.0643246	0	0.0550891	0.0856988	0.012603	0.0148688	0	0.437911	-0.0815619	0.565836	0.245812		0		0.222664	0.683087		0.024771	0.0556469		0.0656874	0.00058492		0.0554984	0.15186
B7ZC38|B7ZC38_HUMAN Endophilin-B2 OS=Homo sapiens OX=9606 GN=SH3GLB2 PE=1 SV=1	B7ZC38	SH3GLB2		0	0.126657	-0.134931	-0.0183282	-0.0207021	0	0.113869	0.0704543	-0.065489	0.215743	0	0.172131	-0.0324898	0.20681	0.357489	0	0.491386	0.0570977	0.282915	0.142777		0		0.226011	0.683087		-0.00996728	0.0235726		0.101477	0.00058492		0.173827	0.499447
Q9Y2S7|PDIP2_HUMAN Polymerase delta-interacting protein 2 OS=Homo sapiens OX=9606 GN=POLDIP2 PE=1 SV=1	Q9Y2S7	POLDIP2		0	0.101007	-0.00921977	-0.0261137	-0.096978	0	0.11005	-0.128106	-0.299874	0.0957966	0	0.0996572	-0.0960343	0.120149	-0.0990977	0	0.308159	0.179417	0.149669	0.186141		0		0.154718	0.683087		-0.0134858	0.0235726		-0.0140425	0.00058492		0.0214654	0.040967
Q08722|CD47_HUMAN Leukocyte surface antigen CD47 OS=Homo sapiens OX=9606 GN=CD47 PE=1 SV=1	Q08722	CD47		0	-0.0821662	0.258626	-0.125026	0.109071	0	0.701105	0.140861	0.0871444	0.0494201	0	0.40797	0.590415	0.339642	0.110501	0	0.52523	-0.28113	0.469591	-0.174058		0		0.388035	0.683087		0.177193	0.148548		0.192838	0.00058492		0.0237332	0.0495022
Q96AB3|ISOC2_HUMAN Isochorismatase domain-containing protein 2 OS=Homo sapiens OX=9606 GN=ISOC2 PE=1 SV=1	Q96AB3	ISOC2		0	0.0997371	0.00806035	0.0766233	-0.0140655	0	0.0756601	0.100799	-0.0887963	0.0477183	0	0.10548	-0.00706934	0.101842	0.0718159	0	0.181145	0.00390743	0.125212	0.270768		0		0.115506	0.683087		0.0264243	0.086843		0.0537203	0.00058492		0.0940591	0.31761
Q9UBS8|RNF14_HUMAN E3 ubiquitin-protein ligase RNF14 OS=Homo sapiens OX=9606 GN=RNF14 PE=1 SV=1	Q9UBS8	RNF14		0	0.247287	0.118748	0.111739	0.0718834	0	-0.0176018	0.0668844	-0.0627752	0.147061	0	0.226792	0.145383	0.23587	0.275757	0	0.352968	0.138532	0.446982	0.256381		0		0.202362	0.683087		0.117387	0.592832		0.182954	0.00403249		0.187771	0.764577
Q99714|HCD2_HUMAN 3-hydroxyacyl-CoA dehydrogenase type-2 OS=Homo sapiens OX=9606 GN=HSD17B10 PE=1 SV=3	Q99714	HSD17B10		0	0.069116	0.117178	-0.0517501	0.0036356	0	0.0852135	-0.137562	-0.328306	0.0153279	0	0.146328	0.126643	0.0820769	0.0492595	0	0.156329	-0.00950897	0.0668607	0.0439168		0		0.114247	0.683087		0.0241874	0.0468277		-0.0577798	0.00058492		0.028035	0.167056
Q9Y4E8|UBP15_HUMAN Ubiquitin carboxyl-terminal hydrolase 15 OS=Homo sapiens OX=9606 GN=USP15 PE=1 SV=3	Q9Y4E8	USP15		0	0.0208649	0.232048	0.00123992	0.101079	0	0.156742	0.0905614	-0.0267291	0.0697513	0	0.216221	0.287918	0.219547	0.237082	0	0.157844	0.102344	0.299043	0.0973993		0		0.137918	0.683087		0.178218	0.568656		0.123275	0.00058492		0.126328	0.618577
A0A087WT12|A0A087WT12_HUMAN Glutathione peroxidase OS=Homo sapiens OX=9606 GN=GPX4 PE=1 SV=1	A0A087WT12	GPX4		0	0.360303	0.197475	0.152084	-0.0127474	0	0.0356317	0.0632724	-0.257232	-0.426053	0	0.102962	-0.08873	-0.243365	-0.405448	0	0.363952	0.0728911	0.0580137	0.0481918		0		0.215712	0.683087		0.061227	0.141504		-0.0726249	0.00058492		-0.199014	0.367529
P00441|SODC_HUMAN Superoxide dismutase [Cu-Zn] OS=Homo sapiens OX=9606 GN=SOD1 PE=1 SV=2	P00441	SOD1		0	-0.445703	-0.43872	-0.593978	-0.308523	0	-1.65957	-0.364848	-1.04051	-1.2491	0	-0.0948433	-0.303983	-0.527986	-0.27247	0	-0.791038	-0.914536	-0.0352292	0.858461		0		-0.747788	0.683087		-0.505522	0.729542		-0.549426	0.159453		-0.242909	0.102977
D6W592|D6W592_HUMAN Heterogeneous nuclear ribonucleoprotein L-like;isoform CRA_d OS=Homo sapiens OX=9606 GN=HNRNPLL PE=1 SV=1	D6W592	HNRNPLL		0	-0.314403	-0.541014	-0.535101	-0.389616	0					0	-0.151205	-0.0286141	-0.126765	-0.284235							0		-0.232804	0.683087		-0.284814	0.231848		-0.330933	0.0586894		-0.336926	0.900496
P02749|APOH_HUMAN Beta-2-glycoprotein 1 OS=Homo sapiens OX=9606 GN=APOH PE=1 SV=3	P02749	APOH		0	0.0121243	0.56413	-0.0101618	0.877811	0	1.03572	0.133219	0.346563	-0.0850882	0	0.704176	1.40451	0.722887	0.350666	0	0.27961	0.280703	0.143023	0.147423		0		0.507908	0.683087		0.595641	0.335462		0.300578	0.040084		0.322703	0.374352
Q9H987|SYP2L_HUMAN Synaptopodin 2-like protein OS=Homo sapiens OX=9606 GN=SYNPO2L PE=2 SV=3	Q9H987	SYNPO2L		0	-0.318929	0.0881169	0.102589	-0.243336	0	-0.180745	0.00873002	0.326736	0.271316	0	-0.442185	-0.00254533	-0.230211	0.0709434	0	0.00501709	0.313644	0.260757	0.285901		0		-0.23421	0.683087		0.101986	0.202093		0.114968	0.00058492		0.0962062	0.154395
E7ESC6|E7ESC6_HUMAN Exportin-7 OS=Homo sapiens OX=9606 GN=XPO7 PE=1 SV=1	E7ESC6	XPO7		0	-0.0455554	0.276003	-0.141525	0.0482512	0	0.255163	0.0764745	0.107629	0.161132	0	0.366696	0.375268	0.156391	0.124528	0	0.415211	-0.0246203	0.290807	-0.00783817		0		0.247879	0.683087		0.175781	0.249679		0.103325	0.00058492		0.0815185	0.387941
P00505|AATM_HUMAN Aspartate aminotransferase;mitochondrial OS=Homo sapiens OX=9606 GN=GOT2 PE=1 SV=3	P00505	GOT2		0	-0.0325918	-0.351826	-0.0614614	-0.356399	0	-0.325806	0.177236	-0.208274	-0.0743256	0	-0.288291	-0.296268	-0.158767	-0.304827	0	-0.0989857	0.204575	0.026591	-0.11365		0		-0.186419	0.683087		-0.0665708	0.0590431		-0.100478	0.00058492		-0.2123	0.673108
Q8IYU8|MICU2_HUMAN Calcium uptake protein 2;mitochondrial OS=Homo sapiens OX=9606 GN=MICU2 PE=1 SV=2	Q8IYU8	MICU2		0	0.109231	0.114468	0.000806386	0.02322	0	0.0808257	-0.0384613	0.0127202	0.0290566	0	0.109138	-0.0480338	0.058023	0.0714407	0	0.298097	-0.0579398	0.239599	0.161249		0		0.149323	0.683087		-0.00749182	0.0210713		0.0777872	0.00058492		0.0712416	0.372686
A0A2R8Y3M4|A0A2R8Y3M4_HUMAN Paraplegin OS=Homo sapiens OX=9606 GN=SPG7 PE=1 SV=1	A0A2R8Y3M4	SPG7		0	0.0448079	0.242359	-0.0237844	0.214507	0	0.10801	0.0482682	0.00335277	0.255904	0	0.268719	0.038842	0.18471	0.185907	0	0.158206	0.145237	0.136729	0.317018		0		0.144936	0.683087		0.118677	0.332184		0.0752518	0.00058492		0.243334	1.00298
Q6P587|FAHD1_HUMAN Acylpyruvase FAHD1;mitochondrial OS=Homo sapiens OX=9606 GN=FAHD1 PE=1 SV=2	Q6P587	FAHD1		0	0.0135769	0.119499	0.0301347	0.0862544	0	0.570561	0.617777	0.26872	-0.273208	0	0.16295	0.162382	0.160107	0.214348	0	0.410782	0.613037	-0.474963	1.10466		0		0.289467	0.683087		0.378174	0.471202		-0.00400026	0.000152682		0.283013	0.211914
K7EPF9|K7EPF9_HUMAN Apolipoprotein C-I OS=Homo sapiens OX=9606 GN=APOC1 PE=1 SV=1	K7EPF9	APOC1		0	-0.0906878	1.07156	-0.300114	1.0595	0	1.49374	0.000571205	0.579022	-0.491927	0	1.49354	2.22635	1.89936	1.00439	0	0.505003	-0.856911	-1.453	-1.10401		0		0.850399	0.683087		0.610392	0.140284		0.181318	0.00058492		0.116987	0.0302098
Q9Y490|TLN1_HUMAN Talin-1 OS=Homo sapiens OX=9606 GN=TLN1 PE=1 SV=3	Q9Y490	TLN1		0	0.150027	0.233721	0.217244	0.30634	0	0.740243	0.0838276	-0.138558	0.0193603	0	0.0544036	0.378873	0.0220569	0.125655	0	0.451724	-0.0289548	0.205703	0.0277351		0		0.349099	0.683087		0.166867	0.249067		0.0766116	0.00058492		0.119773	0.386931
P61313|RL15_HUMAN 60S ribosomal protein L15 OS=Homo sapiens OX=9606 GN=RPL15 PE=1 SV=2	P61313	RPL15		0	-0.217693	-0.235852	-0.117083	-0.173854	0	-0.145032	-0.0177422	-0.186401	0.192997	0	-0.120543	-0.271065	-0.0400995	-0.0289155	0	-0.0343355	0.0216613	-0.169334	0.0159273		0		-0.129401	0.683087		-0.125749	0.242179		-0.128229	0.0868876		0.00153871	0.00255429
Q99653|CHP1_HUMAN Calcineurin B homologous protein 1 OS=Homo sapiens OX=9606 GN=CHP1 PE=1 SV=3	Q99653	CHP1		0	0.0374568	0.429805	-0.0428262	0.0194325	0	0.141678	-0.0578749	-0.169612	0.193939	0	0.411178	0.447194	0.440799	0.200419	0	0.195745	-0.261692	0.132346	0.133844		0		0.196515	0.683087		0.139358	0.108166		0.0901765	0.00058492		0.136909	0.62269
Q9BS92|NPS3B_HUMAN Protein NipSnap homolog 3B OS=Homo sapiens OX=9606 GN=NIPSNAP3B PE=2 SV=1	Q9BS92	NIPSNAP3B		0	0.245673	0.0446761	0.230584	0.153824	0	0.0839029	0.0598441	0.0975449	-0.0822444	0	0.0486363	-0.0915027	0.0558372	0.0109529	0	0.179101	0.146834	0.153022	0.351234		0		0.139328	0.683087		0.0399629	0.0907736		0.134247	0.0868876		0.108442	0.248779
O00151|PDLI1_HUMAN PDZ and LIM domain protein 1 OS=Homo sapiens OX=9606 GN=PDLIM1 PE=1 SV=4	O00151	PDLIM1		0	0.500318	0.531195	0.623867	0.366496	0	0.0724269	-0.283244	-0.338298	-0.0725309	0	0.158119	-0.0550983	-0.240253	-0.0540696	0	0.173843	-0.0723896	0.160905	0.171772		0		0.226177	0.683087		0.030116	0.0235726		0.0515554	0.00058492		0.102917	0.20767
Q6P5Q4|LMOD2_HUMAN Leiomodin-2 OS=Homo sapiens OX=9606 GN=LMOD2 PE=1 SV=2	Q6P5Q4	LMOD2		0	0.0636979	0.0919262	-0.0397121	0.0384236	0	0.24156	-0.0558545	-0.151423	0.130586	0	0.0950504	-0.0553416	-0.0877541	0.148241	0	0.440309	0.0404312	0.295445	0.0781626		0		0.210154	0.683087		0.00529037	0.0150607		0.00413899	0.00058492		0.0988534	0.595605
P29144|TPP2_HUMAN Tripeptidyl-peptidase 2 OS=Homo sapiens OX=9606 GN=TPP2 PE=1 SV=4	P29144	TPP2		0	0.0414711	0.0637423	0.0128834	0.0823521	0	0.102115	0.097923	-0.168405	0.109791	0	0.16142	0.101261	0.148111	0.17534	0	0.267473	0.0592048	0.116748	0.0249195		0		0.14312	0.683087		0.0805329	0.409241		0.0273344	0.00058492		0.0981007	0.527964
Q5JP53|Q5JP53_HUMAN Tubulin beta chain OS=Homo sapiens OX=9606 GN=TUBB PE=1 SV=1	Q5JP53	TUBB		0	-0.0944998	-0.186607	-0.155333	-0.16191	0	-0.244103	-0.290399	-0.799929	-0.594377	0	-0.0306088	0.0281567	0.00958694	-0.0494178	0	-0.220007	0.0860615	-0.0242618	-0.10551		0		-0.147304	0.683087		-0.0906972	0.148548		-0.242484	0.00058492		-0.227804	0.428069
O95210|STBD1_HUMAN Starch-binding domain-containing protein 1 OS=Homo sapiens OX=9606 GN=STBD1 PE=1 SV=1	O95210	STBD1		0	-0.193108	-0.0857582	-0.15477	-0.168275	0	-0.0612152	-0.103951	-0.181798	-0.174211	0	-0.15144	-0.182918	0.12083	-0.0160952	0	-0.0747888	0.223996	0.259816	0.094243		0		-0.120138	0.683087		-0.0371579	0.0549023		0.0110195	0.00058492		-0.0660844	0.199313
O75915|PRAF3_HUMAN PRA1 family protein 3 OS=Homo sapiens OX=9606 GN=ARL6IP5 PE=1 SV=1	O75915	ARL6IP5		0	-0.0873122	-0.27449	-0.0526079	-0.0697924	0	-0.0987153	-0.112248	-0.590774	-0.375738	0	-0.145043	-0.192618	0.117883	0.0212315	0	-0.390815	0.194046	-0.240863	0.230962		0		-0.180472	0.683087		-0.0963276	0.137833		-0.19159	0.00058492		-0.0483343	0.0623924
Q9UKV8|AGO2_HUMAN Protein argonaute-2 OS=Homo sapiens OX=9606 GN=AGO2 PE=1 SV=3	Q9UKV8	AGO2		0	0.0320995	0.0973187	-0.00546409	0.0617139	0	0.336275	-0.278268	0.255168	0.08189	0	0.163079	0.0899497	0.0751753	0.0471132	0	0.630639	0.200901	0.437147	0.0559274		0		0.290523	0.683087		0.0274754	0.0332971		0.190507	0.0136784		0.0616611	0.432772
Q08211|DHX9_HUMAN ATP-dependent RNA helicase A OS=Homo sapiens OX=9606 GN=DHX9 PE=1 SV=4	Q08211	DHX9		0	0.0605013	-0.00866736	-0.035907	-0.0581636	0	0.234664	-0.139034	-0.156363	0.0286595	0	0.0962882	-0.0808147	-0.0349045	0.102376	0	0.44928	0.00621689	0.494414	0.0585228		0		0.210183	0.683087		-0.0555749	0.186472		0.0668099	0.00058492		0.0328486	0.137859
Q9H9B4|SFXN1_HUMAN Sideroflexin-1 OS=Homo sapiens OX=9606 GN=SFXN1 PE=1 SV=4	Q9H9B4	SFXN1		0	0.147159	-0.0740836	-0.0221788	-0.136908	0	0.275603	-0.0586029	0.110539	0.223493	0	0.0021803	-0.0510746	0.0109043	0.0336021	0	0.41455	-0.0722767	0.402366	0.416452		0		0.209873	0.683087		-0.0640095	0.300247		0.125407	0.00058492		0.13416	0.248038
O76094|SRP72_HUMAN Signal recognition particle subunit SRP72 OS=Homo sapiens OX=9606 GN=SRP72 PE=1 SV=3	O76094	SRP72		0	0.0102766	0.0141695	-0.0855229	-0.0867132	0	0.117142	-0.0457155	-0.0889241	0.151422	0	0.242481	0.149814	0.0797558	0.245529	0	0.27464	0.0468107	0.26871	0.159024		0		0.161135	0.683087		0.0412696	0.114078		0.0435046	0.00058492		0.117315	0.357104
P10644|KAP0_HUMAN cAMP-dependent protein kinase type I-alpha regulatory subunit OS=Homo sapiens OX=9606 GN=PRKAR1A PE=1 SV=1	P10644	PRKAR1A		0	-0.0730937	-0.205994	-0.146523	-0.179071	0	-0.317654	-0.154151	-0.0243759	-0.160511	0	-0.155085	-0.20672	0.0487993	0.00461556	0	-0.715693	-0.444986	-0.411817	-0.102095		0		-0.315381	0.683087		-0.252963	0.71059		-0.133479	0.00058492		-0.109265	0.503036
Q5QJ74|TBCEL_HUMAN Tubulin-specific chaperone cofactor E-like protein OS=Homo sapiens OX=9606 GN=TBCEL PE=1 SV=2	Q5QJ74	TBCEL		0	0.0304473	0.130589	-0.0594309	0.0474844	0	0.217021	-0.0509942	-0.0132746	0.0519511	0	0.228209	0.154668	0.233848	0.176235	0	0.599962	0.303924	0.263715	-0.0847588		0		0.26891	0.683087		0.134547	0.248091		0.106215	0.00058492		0.0477279	0.155736
Q8N0X4|CLYBL_HUMAN Citramalyl-CoA lyase;mitochondrial OS=Homo sapiens OX=9606 GN=CLYBL PE=1 SV=2	Q8N0X4	CLYBL		0	0.0518007	0.0815313	-0.0856287	-0.0526264	0	0.330873	0.164094	-0.103441	0.0672817	0	0.0684187	-0.0082311	0.213184	0.165524	0	0.238434	-0.0675598	0.159433	0.0811189		0		0.172382	0.683087		0.0424587	0.095714		0.0458867	0.00058492		0.0653245	0.268203
Q9BU61|NDUF3_HUMAN NADH dehydrogenase [ubiquinone] 1 alpha subcomplex assembly factor 3 OS=Homo sapiens OX=9606 GN=NDUFAF3 PE=1 SV=1	Q9BU61	NDUFAF3		0	0.252416	-0.111365	0.0859188	0.0435457	0	0.0244831	0.0991455	-0.0801337	0.110331	0	0.0960204	-0.134335	0.0893867	0.123999	0	0.222617	-0.0738321	0.195038	0.302885		0		0.148884	0.683087		-0.0550966	0.137066		0.0725525	0.00058492		0.14519	0.55531
Q16401|PSMD5_HUMAN 26S proteasome non-ATPase regulatory subunit 5 OS=Homo sapiens OX=9606 GN=PSMD5 PE=1 SV=3	Q16401	PSMD5		0	-0.0317361	0.146368	-0.0491422	-0.0885955	0	0.242221	-0.0337108	-0.245671	0.0818422	0	0.253893	0.230589	0.203161	0.20416	0	0.220609	-0.137032	0.0414832	-0.0230112		0		0.171247	0.683087		0.0515533	0.0787723		-0.0125424	0.00058492		0.0435989	0.114665
O43294|TGFI1_HUMAN Transforming growth factor beta-1-induced transcript 1 protein OS=Homo sapiens OX=9606 GN=TGFB1I1 PE=1 SV=2	O43294	TGFB1I1		0	-0.0261898	-0.402157	0.109229	-0.0560134	0	0.211305	0.0111311	-0.0268162	-0.0619051	0	0.212841	0.174071	0.287444	0.313886	0	0.315869	-0.177728	0.147237	-0.0767337		0		0.178456	0.683087		-0.0986706	0.108166		0.129274	0.00365472		0.0298086	0.0462943
P0C0L4|CO4A_HUMAN Complement C4-A OS=Homo sapiens OX=9606 GN=C4A PE=1 SV=2	P0C0L4	C4A		0	-0.16746	0.879857	-0.454764	0.870708	0	1.25956	0.290604	0.654926	-0.0989247	0	1.28465	1.58956	1.10689	1.13101	0	0.514181	0.162331	0.339776	-0.394595		0		0.722733	0.683087		0.730587	0.388216		0.411708	0.00058492		0.377049	0.230106
O15230|LAMA5_HUMAN Laminin subunit alpha-5 OS=Homo sapiens OX=9606 GN=LAMA5 PE=1 SV=8	O15230	LAMA5		0	0.274558	0.183872	0.421835	0.358029	0	0.427243	0.241319	-0.368192	-0.00811558	0	-0.0695058	-0.0225115	-0.250654	-0.0240072	0	0.350893	-0.0790839	0.391099	0.0599251		0		0.245797	0.683087		0.0808988	0.148548		0.0485219	0.00058492		0.0964579	0.229404
Q02750|MP2K1_HUMAN Dual specificity mitogen-activated protein kinase kinase 1 OS=Homo sapiens OX=9606 GN=MAP2K1 PE=1 SV=2	Q02750	MAP2K1		0	-0.118843	-0.0587907	-0.210521	-0.135477	0	-0.0609341	0.0425196	-0.506595	-0.147483	0	-0.108747	-0.0022272	0.0487568	0.0589361	0	-0.111489	0.205058	0.186426	0.0836596		0		-0.100003	0.683087		0.0466399	0.0976309		-0.120483	0.00058492		-0.0350913	0.0889513
P51692|STA5B_HUMAN Signal transducer and activator of transcription 5B OS=Homo sapiens OX=9606 GN=STAT5B PE=1 SV=2	P51692	STAT5B							0	0.244878	0.122256	-0.240151	0.168731						0	0.219821	0.185278	0.142475	0.170379		0		0.23235	0.683087		0.153767	0.253007		-0.048838	0.00058492		0.169555	0.503036
A0A087WT44|A0A087WT44_HUMAN Heme oxygenase 2 OS=Homo sapiens OX=9606 GN=HMOX2 PE=1 SV=1	A0A087WT44	HMOX2		0	0.0690023	0.180018	-0.114772	-0.00280507	0	0.191869	-0.0401591	-0.387322	0.283446	0	0.163428	0.165894	0.151038	0.254235	0	0.587258	0.125121	0.577197	0.151721		0		0.252889	0.683087		0.107718	0.249067		0.0565351	0.00058492		0.171649	0.595605
Q9H1K1|ISCU_HUMAN Iron-sulfur cluster assembly enzyme ISCU;mitochondrial OS=Homo sapiens OX=9606 GN=ISCU PE=1 SV=2	Q9H1K1	ISCU		0	0.077057	0.047052	-0.0533794	-0.0329061	0	0.0990547	-0.0426193	-0.00120884	0.193696	0	0.183696	-0.0431707	0.23502	0.167386	0	0.464951	0.185708	0.442437	0.429734		0		0.20619	0.683087		0.0367426	0.0799132		0.155717	0.00058492		0.189478	0.461303
P01019|ANGT_HUMAN Angiotensinogen OS=Homo sapiens OX=9606 GN=AGT PE=1 SV=1	P01019	AGT		0	0.149064	0.449852	0.10868	0.480625	0	0.502404	0.239159	0.415239	0.346339	0	0.411324	0.487857	0.219556	0.251976	0	-0.0171328	0.30966	0.296535	0.0316658		0		0.261415	0.683087		0.371632	1.31329		0.260003	0.225681		0.277652	0.673108
Q7Z2W9|RM21_HUMAN 39S ribosomal protein L21;mitochondrial OS=Homo sapiens OX=9606 GN=MRPL21 PE=1 SV=2	Q7Z2W9	MRPL21		0	0.572802	1.36495	0.582838	0.785413	0	-0.0268629	0.107142	-0.0273013	0.248351	0	0.504413	0.762818	0.782634	0.348929	0	0.164471	0.0663844	0.0771959	0.284571		0		0.303706	0.683087		0.575325	0.253163		0.353842	0.0310878		0.416816	0.770583
P25788|PSA3_HUMAN Proteasome subunit alpha type-3 OS=Homo sapiens OX=9606 GN=PSMA3 PE=1 SV=2	P25788	PSMA3		0	0.00656347	-0.0796442	-0.0991782	-0.138109	0	-0.168914	-0.132547	0.0982202	-0.288523	0	-0.255108	-0.0788572	-0.0627446	0.0294072	0	-0.46482	-0.0090653	-0.0993899	-0.00205419		0		-0.22057	0.683087		-0.0750283	0.251842		-0.0407731	0.00058492		-0.0998196	0.292983
Q9GZT3|SLIRP_HUMAN SRA stem-loop-interacting RNA-binding protein;mitochondrial OS=Homo sapiens OX=9606 GN=SLIRP PE=1 SV=1	Q9GZT3	SLIRP		0	0.144897	-0.0184289	0.0708418	0.079888	0	0.121849	0.11605	-0.0698551	0.131857	0	0.0250741	-0.211074	0.0844447	0.089023	0	0.166307	-0.298925	0.135482	0.078545		0		0.114532	0.683087		-0.103094	0.162951		0.0552284	0.00058492		0.0948281	0.657097
A0A2R8Y793|A0A2R8Y793_HUMAN Actin;cytoplasmic 1 (Fragment) OS=Homo sapiens OX=9606 GN=ACTB PE=1 SV=1	A0A2R8Y793	ACTB		0	0.022576	0.0166614	0.0481435	0.0274794	0	0.441384	0.0561137	-0.040214	0.0342878	0	0.0962061	0.244652	0.14813	0.0603049	0	0.535939	-0.038213	0.637988	0.0281803		0		0.274026	0.683087		0.0698035	0.153203		0.198512	0.00058492		0.0375631	0.251738
Q9NZL4|HPBP1_HUMAN Hsp70-binding protein 1 OS=Homo sapiens OX=9606 GN=HSPBP1 PE=1 SV=2	Q9NZL4	HSPBP1		0	0.13892	0.0732726	0.138759	-0.0317461	0	-0.00326442	0.008028	-0.169656	0.140165	0	0.246885	0.103022	0.105184	0.249383	0	0.200033	-0.0535797	0.0644928	0.197757		0		0.145643	0.683087		0.0326856	0.0922829		0.0346949	0.00058492		0.13889	0.486793
Q9Y6P5|SESN1_HUMAN Sestrin-1 OS=Homo sapiens OX=9606 GN=SESN1 PE=1 SV=2	Q9Y6P5	SESN1		0	0.0319774	-0.0851258	0.0546442	-0.0283741	0	0.122811	0.0661928	-0.124947	0.150033	0	0.118996	-0.0877587	0.140871	0.191192	0	0.185755	0.0268646	0.127457	0.313701		0		0.114885	0.683087		-0.0199568	0.0556469		0.0495062	0.00058492		0.156638	0.48832
Q6ZMU5|TRI72_HUMAN Tripartite motif-containing protein 72 OS=Homo sapiens OX=9606 GN=TRIM72 PE=1 SV=2	Q6ZMU5	TRIM72		0	-0.359188	-0.493901	-0.464137	-0.510668	0	-0.061406	-0.0146555	-0.316867	-0.418164	0	-0.0918279	-0.0773113	0.0164929	-0.117683	0	-0.150065	-0.0593992	-0.210256	0.0423193		0		-0.165622	0.683087		-0.161317	0.215561		-0.243692	0.0985977		-0.251049	0.461303
O75335|LIPA4_HUMAN Liprin-alpha-4 OS=Homo sapiens OX=9606 GN=PPFIA4 PE=2 SV=3	O75335	PPFIA4		0	-0.299723	-0.441522	-0.361244	-0.253749	0	-0.867663	0.128862	-0.315636	-3.48793	0	0.0805123	-0.193822	0.0407047	0.203934	0	-0.618486	0.496309	0.504937	0.605734		0		-0.42634	0.683087		-0.00254326	0.00141267		-0.0328097	0.00058492		-0.733003	0.163006
P13796|PLSL_HUMAN Plastin-2 OS=Homo sapiens OX=9606 GN=LCP1 PE=1 SV=6	P13796	LCP1		0	-0.0997476	0.378296	-0.151957	0.205016	0	1.64879	-0.0263088	0.311743	-0.0759706	0	0.425701	0.91297	0.284034	0.132005	0	1.2275	-0.665245	2.15799	-0.0685607		0		0.800562	0.683087		0.149928	0.0598951		0.650452	0.00058492		0.0481224	0.115877
Q9UPN7|PP6R1_HUMAN Serine/threonine-protein phosphatase 6 regulatory subunit 1 OS=Homo sapiens OX=9606 GN=PPP6R1 PE=1 SV=5	Q9UPN7	PPP6R1		0	-0.0463798	0.336835	0.194056	0.0777537	0	0.249912	0.156411	0.0494972	0.351761	0	0.299637	0.21738	0.388214	0.113708	0	0.593409	0.138772	0.486628	0.53883		0		0.274145	0.683087		0.21235	0.828013		0.279599	0.154402		0.270513	0.597864
P14174|MIF_HUMAN Macrophage migration inhibitory factor OS=Homo sapiens OX=9606 GN=MIF PE=1 SV=4	P14174	MIF		0	-0.181277	-0.226395	-0.463839	-0.141326	0	-0.543709	-0.3304	-0.562505	-0.718154	0	0.0456328	-0.0725446	0.0445693	-0.154503	0	-0.466309	-0.455915	-1.43589	-0.299205		0		-0.286415	0.683087		-0.271314	0.568656		-0.604416	0.082337		-0.328297	0.595605
P04792|HSPB1_HUMAN Heat shock protein beta-1 OS=Homo sapiens OX=9606 GN=HSPB1 PE=1 SV=2	P04792	HSPB1		0	-0.0387615	0.748656	-0.125624	1.44977	0	0.410953	0.24944	-0.372158	-0.270505	0	0.266019	0.379973	-0.0351738	0.514565	0	0.805499	1.16437	-0.134953	1.32699		0		0.360927	0.683087		0.635611	0.568656		-0.166977	0.046991		0.755204	0.460422
P56539|CAV3_HUMAN Caveolin-3 OS=Homo sapiens OX=9606 GN=CAV3 PE=1 SV=1	P56539	CAV3		0	-0.414089	-0.353727	-0.585983	-0.482752	0	-0.266367	-0.200169	-0.556486	-0.216288	0	-0.496339	-1.04329	-0.767269	-0.100789	0	-1.9314	-0.331702	-0.506633	-0.121411		0		-0.777047	0.683087		-0.482221	0.432515		-0.604093	1.35033		-0.23031	0.601757
Q96DH6|MSI2H_HUMAN RNA-binding protein Musashi homolog 2 OS=Homo sapiens OX=9606 GN=MSI2 PE=1 SV=1	Q96DH6	MSI2		0	-0.00604986	0.660391	-0.00269971	0.150761	0	0.121058	-0.00217074	-0.0429429	0.138352	0	0.541218	0.707625	0.202123	0.112265	0	0.46267	0.19844	0.453074	0.600321		0		0.279724	0.683087		0.391071	0.385334		0.152389	0.00058492		0.250425	0.503036
Q13153|PAK1_HUMAN Serine/threonine-protein kinase PAK 1 OS=Homo sapiens OX=9606 GN=PAK1 PE=1 SV=2	Q13153	PAK1							0	0.207349	0.150968	-0.0442726	0.249865						0	0.236711	0.331341	0.111483	0.293376		0		0.22203	0.683087		0.241155	0.309924		0.033605	0.00058492		0.27162	0.690801
E7EWH9|E7EWH9_HUMAN Myomesin-2 OS=Homo sapiens OX=9606 GN=MYOM2 PE=1 SV=2	E7EWH9	MYOM2		0	0.252905	0.368785	0.349539	0.214856	0	0.80881	0.853831	-0.956852	0.568741	0	0.061546	-0.105375	-0.0433042	-0.0408373	0	0.226292	0.271447	0.107914	0.177991		0		0.337388	0.683087		0.347172	0.249067		-0.135676	0.00058492		0.230188	0.42784
Q15056|IF4H_HUMAN Eukaryotic translation initiation factor 4H OS=Homo sapiens OX=9606 GN=EIF4H PE=1 SV=5	Q15056	EIF4H		0	-0.352412	-0.416888	-0.518832	-0.415786	0	-0.131364	0.0101305	-0.0743053	0.127602	0	0.00808508	-0.137782	0.00152794	0.0294724	0	-0.46634	-0.105067	-0.757003	0.137955		0		-0.235508	0.683087		-0.162402	0.248091		-0.337153	0.040084		-0.0301891	0.031972
Q13884|SNTB1_HUMAN Beta-1-syntrophin OS=Homo sapiens OX=9606 GN=SNTB1 PE=1 SV=3	Q13884	SNTB1		0	0.407165	0.0916984	-0.00325849	0.0424892	0	-0.000596559	-0.0304839	-0.191284	0.107931	0	0.110364	0.126367	0.210783	0.10561	0	0.290418	0.153019	0.190005	0.131394		0		0.201838	0.683087		0.08515	0.24524		0.0515617	0.00058492		0.0968561	0.618577
Q15327|ANKR1_HUMAN Ankyrin repeat domain-containing protein 1 OS=Homo sapiens OX=9606 GN=ANKRD1 PE=1 SV=2	Q15327	ANKRD1		0	-1.36785	-1.01453	-1.42274	-0.677489	0					0	-0.269967	-0.0960293	0.333088	0.00433651							0		-0.818907	0.683087		-0.55528	0.245136		-0.544825	0.00058492		-0.336576	0.31761
P01714|LV319_HUMAN Immunoglobulin lambda variable 3-19 OS=Homo sapiens OX=9606 GN=IGLV3-19 PE=1 SV=2	P01714	IGLV3-19		0	-0.20482	0.254106	-0.215271	0.268131	0	0.834315	0.216465	0.427461	-0.296057	0	0.881255	1.08814	0.452174	0.443214	0	0.521903	-0.0128838	0.469999	-0.42528		0		0.508163	0.683087		0.386456	0.243011		0.283591	0.00795531		-0.00249798	0.00212062
P01591|IGJ_HUMAN Immunoglobulin J chain OS=Homo sapiens OX=9606 GN=JCHAIN PE=1 SV=4	P01591	JCHAIN		0	-0.0898559	0.54818	-0.165056	0.733062	0	0.586802	0.148384	0.231888	-0.330554	0	1.32599	1.60342	1.01749	0.824864	0	0.530953	-0.00975654	0.359925	-0.543249		0		0.588471	0.683087		0.572557	0.243011		0.361062	0.00058492		0.171031	0.0843997
P62241|RS8_HUMAN 40S ribosomal protein S8 OS=Homo sapiens OX=9606 GN=RPS8 PE=1 SV=2	P62241	RPS8		0	-0.0530704	-0.151648	-0.108347	-0.110881	0	-0.224685	-0.0264284	-0.300214	-0.216699	0	-0.0444682	-0.212934	0.0327454	-0.0117305	0	-0.289133	0.024101	-0.302428	0.00462413		0		-0.152839	0.683087		-0.0917274	0.2286		-0.169561	0.0250613		-0.0836714	0.323069
O60826|CCD22_HUMAN Coiled-coil domain-containing protein 22 OS=Homo sapiens OX=9606 GN=CCDC22 PE=1 SV=1	O60826	CCDC22		0	-0.019453	0.188786	-0.0991192	-0.242112	0	0.134899	-0.0721087	-0.234261	0.0288145	0	0.309147	0.273076	0.121899	0.136946	0	0.379486	0.0798407	0.268492	0.0248179		0		0.20102	0.683087		0.117398	0.2286		0.0142527	0.00058492		-0.0128833	0.0197224
P49755|TMEDA_HUMAN Transmembrane emp24 domain-containing protein 10 OS=Homo sapiens OX=9606 GN=TMED10 PE=1 SV=2	P49755	TMED10		0	0.0373308	0.000138483	0.0574316	0.0186815	0	-0.153111	-0.210954	-0.309114	-0.462486	0	-0.366769	-0.110114	-5.71e-05	-0.102307	0	-0.413704	-0.0138122	-0.0654306	0.0314887		0		-0.224064	0.683087		-0.0836856	0.224712		-0.0792924	0.00058492		-0.128655	0.245649
D6RHD5|D6RHD5_HUMAN Serum albumin OS=Homo sapiens OX=9606 GN=ALB PE=1 SV=1	D6RHD5	ALB		0	-0.0669386	0.613192	-0.0326718	0.891759	0	0.257801	-0.0746946	0.254796	0.308919	0	0.547824	0.964604	0.392143	0.477729	0	0.324451	-0.0428703	0.258807	-0.609484		0		0.265784	0.683087		0.365058	0.222898		0.218269	0.0928673		0.267231	0.179993
P09382|LEG1_HUMAN Galectin-1 OS=Homo sapiens OX=9606 GN=LGALS1 PE=1 SV=2	P09382	LGALS1		0	-0.099116	-0.0911199	-0.122586	0.0499669	0	-0.474699	0.108445	-0.271301	0.00169875	0	-0.209903	-0.226526	-0.0226846	-0.192818	0	-0.0501991	-0.194319	-0.824922	0.197012		0		-0.208479	0.683087		-0.10088	0.195734		-0.310374	0.0135242		0.0139649	0.021358
Q9UNL2|SSRG_HUMAN Translocon-associated protein subunit gamma OS=Homo sapiens OX=9606 GN=SSR3 PE=1 SV=1	Q9UNL2	SSR3		0	-0.0256015	0.0565714	-0.278256	-0.0734992	0	0.164789	-0.0828284	-0.212208	0.040498	0	0.235507	0.287753	0.170875	0.160346	0	0.337388	0.127274	0.296618	0.191693		0		0.178021	0.683087		0.0971925	0.181689		-0.00574266	0.00058492		0.0797597	0.265369
Q5JSZ5|PRC2B_HUMAN Protein PRRC2B OS=Homo sapiens OX=9606 GN=PRRC2B PE=1 SV=2	Q5JSZ5	PRRC2B		0	0.596928	0.0594136	-0.361187	-0.318191	0	0.177858	-0.656653	-0.527006	-0.109481	0	0.375446	0.104459	-0.930202	-0.328789	0	-0.0294653	-0.250953	-0.248792	-0.201247		0		0.280192	0.683087		-0.185933	0.162951		-0.516797	0.294947		-0.239427	0.900496
Q8IXM3|RM41_HUMAN 39S ribosomal protein L41;mitochondrial OS=Homo sapiens OX=9606 GN=MRPL41 PE=1 SV=1	Q8IXM3	MRPL41		0	0.250221	0.195023	0.185224	0.151762	0	-0.00970826	0.0484824	-0.142917	0.144147	0	0.23527	0.202866	0.403355	0.164789	0	0.128494	-0.11844	0.0999888	0.114552		0		0.151069	0.683087		0.0819828	0.151847		0.136413	0.00058492		0.143812	0.900496
P11021|BIP_HUMAN Endoplasmic reticulum chaperone BiP OS=Homo sapiens OX=9606 GN=HSPA5 PE=1 SV=2	P11021	HSPA5		0	-0.265702	-0.403362	-0.411171	-0.442067	0	-0.0731181	-0.107169	-0.149357	-0.72082	0	-0.191141	-0.113764	-0.0764304	-0.0967924	0	-0.0365303	0.156601	0.00480087	0.111552		0		-0.141623	0.683087		-0.116923	0.151847		-0.158039	0.00360751		-0.287032	0.369808
Q99729|ROAA_HUMAN Heterogeneous nuclear ribonucleoprotein A/B OS=Homo sapiens OX=9606 GN=HNRNPAB PE=1 SV=2	Q99729	HNRNPAB		0	0.275086	0.160442	0.114766	0.16323	0	0.138921	-0.42779	-0.762811	-0.381601	0	0.175752	-0.030282	0.142095	0.0153389	0	0.945261	-0.207875	0.924771	0.363889		0		0.383755	0.683087		-0.126376	0.148548		0.104705	0.00058492		0.0402142	0.0369628
Q9UIQ6|LCAP_HUMAN Leucyl-cystinyl aminopeptidase OS=Homo sapiens OX=9606 GN=LNPEP PE=1 SV=3	Q9UIQ6	LNPEP		0	0.187807	0.230418	0.138427	0.272085	0	0.0931382	-0.0772679	-0.276015	-0.00140732	0	0.041875	0.0126991	0.0265535	0.23159	0	0.377502	0.0841073	0.324837	0.204756		0		0.175081	0.683087		0.0624891	0.133223		0.0534506	0.00058492		0.176756	0.618577
Q7Z7F7|RM55_HUMAN 39S ribosomal protein L55;mitochondrial OS=Homo sapiens OX=9606 GN=MRPL55 PE=1 SV=1	Q7Z7F7	MRPL55		0	-0.0636171	-0.298333	-0.356351	-0.329574	0	0.473747	0.391283	0.222357	0.584111	0	0.201358	-0.0553533	0.0548669	0.07613	0	0.433807	0.524959	0.404896	0.741159		0		0.261324	0.683087		0.140639	0.099873		0.0814421	0.00058492		0.267956	0.249995
Q15121|PEA15_HUMAN Astrocytic phosphoprotein PEA-15 OS=Homo sapiens OX=9606 GN=PEA15 PE=1 SV=2	Q15121	PEA15		0	-0.502579	-0.338878	-0.303605	-0.0313651	0	-0.292307	-0.194068	-0.678654	0.0335809	0	0.00239919	-0.167854	0.0277223	0.106772	0	-0.135604	0.294847	0.297097	0.235592		0		-0.232022	0.683087		-0.101488	0.0983647		-0.16436	0.00058492		0.0861448	0.304313
M0QWZ7|M0QWZ7_HUMAN Serine--tRNA ligase;mitochondrial OS=Homo sapiens OX=9606 GN=SARS2 PE=1 SV=1	M0QWZ7	SARS2		0	0.129155	-0.00362235	0.0354044	0.0402864	0	0.0447407	0.0706068	-0.0455547	-0.00607644	0	0.133559	-0.0816011	0.0980719	0.199486	0	0.373509	-0.139262	0.298694	0.0500459		0		0.170241	0.683087		-0.0384697	0.0922829		0.096654	0.00058492		0.0709355	0.298987
P35499|SCN4A_HUMAN Sodium channel protein type 4 subunit alpha OS=Homo sapiens OX=9606 GN=SCN4A PE=1 SV=4	P35499	SCN4A		0	0.120566	-0.0183253	0.0367831	-0.0126539	0	0.225522	0.128051	0.12072	0.255425	0	-0.000760227	-0.114618	-0.112231	0.138619	0	0.234972	0.151976	0.207821	0.454639		0		0.145075	0.683087		0.036771	0.0691429		0.0632733	0.00058492		0.209007	0.490586
Q9P2K8|E2AK4_HUMAN eIF-2-alpha kinase GCN2 OS=Homo sapiens OX=9606 GN=EIF2AK4 PE=1 SV=3	Q9P2K8	EIF2AK4		0	-0.00157679	-0.146291	0.117512	0.246474	0	0.592843	-0.0436141	-0.270299	-0.0132783	0	0.12724	0.0567951	0.0484449	-0.00245901	0	0.440442	0.0198903	0.661505	0.127603		0		0.289737	0.683087		-0.028305	0.06867		0.13929	0.00058492		0.0895849	0.301407
P50895|BCAM_HUMAN Basal cell adhesion molecule OS=Homo sapiens OX=9606 GN=BCAM PE=1 SV=2	P50895	BCAM		0	0.32253	0.0449345	0.333867	0.0433954	0	0.0198405	0.0834201	-0.351236	0.045239	0	0.0737742	-0.0200955	-0.169685	0.0283891	0	0.28303	-0.0395852	0.113707	0.483945		0		0.174794	0.683087		0.0171685	0.0556469		-0.0183365	0.00058492		0.150242	0.302766
Q14657|LAGE3_HUMAN EKC/KEOPS complex subunit LAGE3 OS=Homo sapiens OX=9606 GN=LAGE3 PE=1 SV=2	Q14657	LAGE3		0	0.16022	-0.242797	-0.253522	-0.323226	0	-0.0231228	-0.210108	-0.234126	-0.0063665	0	0.272332	0.143246	0.172328	0.251672	0	0.410824	0.148691	0.254404	0.105944		0		0.205063	0.683087		-0.040242	0.0491795		-0.0152289	0.00058492		0.00700582	0.00697887
P50552|VASP_HUMAN Vasodilator-stimulated phosphoprotein OS=Homo sapiens OX=9606 GN=VASP PE=1 SV=3	P50552	VASP		0	0.222605	0.362783	0.303888	0.507739	0	1.0314	-0.186463	-0.251309	-0.130638	0	-0.037384	0.561849	-0.351927	0.0511259	0	0.741099	-0.434125	1.13552	0.197692		0		0.489431	0.683087		0.076011	0.0431826		0.209044	0.00058492		0.15648	0.261544
Q8TDQ7|GNPI2_HUMAN Glucosamine-6-phosphate isomerase 2 OS=Homo sapiens OX=9606 GN=GNPDA2 PE=1 SV=1	Q8TDQ7	GNPDA2							0	0.194928	-0.00368953	-0.153431	0.128304						0	0.431349	0.0485711	0.375105	0.0253607		0		0.313139	0.683087		0.0224408	0.0425938		0.110837	0.00058492		0.0768326	0.197489
Q29974|2B1G_HUMAN HLA class II histocompatibility antigen;DRB1-16 beta chain OS=Homo sapiens OX=9606 GN=HLA-DRB1 PE=1 SV=1	Q29974	HLA-DRB1		0	-0.0231908	0.0501279	-0.0864647	0.0443982	0	0.134489	-0.31389	-0.210932	-0.126851	0	0.345973	0.353967	0.188778	0.175775	0	0.345364	0.0744952	0.610198	0.316333		0		0.200659	0.683087		0.0411752	0.0397827		0.125395	0.00058492		0.102414	0.230246
O43660|PLRG1_HUMAN Pleiotropic regulator 1 OS=Homo sapiens OX=9606 GN=PLRG1 PE=1 SV=1	O43660	PLRG1		0	-0.0609916	-0.269242	-0.223695	-0.0921025	0	0.357512	-0.0167937	-0.179833	0.057681	0	0.265891	0.0545417	-0.0700059	0.184561	0	0.239255	0.127946	0.158377	0.240981		0		0.200417	0.683087		-0.0258869	0.0385433		-0.0787891	0.00058492		0.0977802	0.278863
Q6PI48|SYDM_HUMAN Aspartate--tRNA ligase;mitochondrial OS=Homo sapiens OX=9606 GN=DARS2 PE=1 SV=1	Q6PI48	DARS2		0	0.0526654	0.0102567	0.102457	0.0424166	0	0.119089	0.0516204	-0.0845569	0.155331	0	0.265021	0.11122	0.140064	0.170774	0	0.0849381	-0.221951	0.144102	0.362863		0		0.130429	0.683087		-0.0122134	0.0231883		0.0755165	0.00058492		0.182846	0.601757
O75489|NDUS3_HUMAN NADH dehydrogenase [ubiquinone] iron-sulfur protein 3;mitochondrial OS=Homo sapiens OX=9606 GN=NDUFS3 PE=1 SV=1	O75489	NDUFS3		0	0.300956	0.0717508	0.269328	0.10201	0	0.132076	0.0207168	-0.113426	0.128928	0	0.0357831	-0.120384	0.0654619	0.0684185	0	0.106438	0.033645	0.168423	0.244877		0		0.143813	0.683087		0.00143225	0.00247117		0.0974469	0.00058492		0.136058	0.66678
P34896|GLYC_HUMAN Serine hydroxymethyltransferase;cytosolic OS=Homo sapiens OX=9606 GN=SHMT1 PE=1 SV=1	P34896	SHMT1		0	0.148596	0.0402023	0.142605	0.0114802	0	0.00878083	-0.0660628	-0.14465	-0.0348245	0	0.150773	0.0226785	0.0964932	0.234776	0	0.314844	0.00134533	0.256308	0.101932		0		0.155749	0.683087		-0.000459157	0.00141267		0.0876894	0.00058492		0.0783411	0.265369
P53701|CCHL_HUMAN Cytochrome c-type heme lyase OS=Homo sapiens OX=9606 GN=HCCS PE=1 SV=1	P53701	HCCS		0	0.17418	0.156857	-0.000675112	-0.00682948	0	0.117524	-0.00744957	-0.0793738	0.094818	0	0.0189793	-0.13816	-0.126194	-0.057739	0	0.150852	-0.00877103	0.0729709	0.150743		0		0.115384	0.683087		0.000618955	0.00139327		-0.0333179	0.00058492		0.0452481	0.162127
Q9UBS0|KS6B2_HUMAN Ribosomal protein S6 kinase beta-2 OS=Homo sapiens OX=9606 GN=RPS6KB2 PE=1 SV=2	Q9UBS0	RPS6KB2		0	-0.0801977	0.0174461	-0.426254	-0.00685429	0	0.266177	-0.221752	-0.209108	0.191316	0	0.387532	-0.254141	0.0495845	0.227438	0	0.311976	-0.132716	0.0964463	0.171575		0		0.221372	0.683087		-0.147791	0.365993		-0.122333	0.00058492		0.145869	0.595605
Q9UHP9|SMPX_HUMAN Small muscular protein OS=Homo sapiens OX=9606 GN=SMPX PE=2 SV=3	Q9UHP9	SMPX		0	-0.00493754	0.0219652	-0.0865278	-0.193796	0	-0.162108	-0.1769	-0.309751	-0.198817	0	-0.324539	-0.150723	-0.103435	-0.0741299	0	-0.138594	-0.138428	-0.111576	-0.0306802		0		-0.157545	0.683087		-0.111022	0.312053		-0.152823	0.0868876		-0.124356	0.578414
A8MXP9|A8MXP9_HUMAN Matrin-3 OS=Homo sapiens OX=9606 GN=MATR3 PE=1 SV=1	A8MXP9	MATR3		0	0.0496634	-0.104057	-0.0991292	-0.0783312	0	0.308167	-0.172502	-0.111493	0.0640349	0	0.137831	0.00655306	0.231818	0.0370436	0	0.723181	-0.00826734	0.740382	0.0495761		0		0.304711	0.683087		-0.0695683	0.208546		0.190394	0.00058492		0.0180809	0.0654145
Q86TI2|DPP9_HUMAN Dipeptidyl peptidase 9 OS=Homo sapiens OX=9606 GN=DPP9 PE=1 SV=3	Q86TI2	DPP9		0	0.0855561	0.0538641	0.022913	0.0859138	0	0.0847302	-0.207198	-0.127232	0.0312558	0	0.0962724	-0.00990094	0.25687	0.231617	0	0.331152	-0.171436	0.174466	0.0998018		0		0.149428	0.683087		-0.0836677	0.184299		0.0817542	0.00058492		0.112147	0.503036
P05106|ITB3_HUMAN Integrin beta-3 OS=Homo sapiens OX=9606 GN=ITGB3 PE=1 SV=2	P05106	ITGB3		0	-0.0394936	0.424681	-0.283143	0.0931582	0	2.08021	0.0796961	0.39178	0.0840145	0	0.423002	1.94651	1.42579	0.338964	0	1.16729	-0.287173	0.362958	-0.102319		0		0.907753	0.683087		0.540929	0.170453		0.474347	0.00058492		0.103454	0.245649
P67936|TPM4_HUMAN Tropomyosin alpha-4 chain OS=Homo sapiens OX=9606 GN=TPM4 PE=1 SV=3	P67936	TPM4		0	0.0742249	-0.0199696	-0.0492542	-0.00749823	0	0.585199	-0.209817	-0.252727	-0.13708	0	0.0227661	0.383443	0.0939652	-0.0310309	0	0.589124	0.566017	0.826697	0.633109		0		0.317829	0.683087		0.179918	0.151847		0.15467	0.00058492		0.114375	0.124616
E7EX59|E7EX59_HUMAN Propionyl-CoA carboxylase beta chain;mitochondrial OS=Homo sapiens OX=9606 GN=PCCB PE=1 SV=1	E7EX59	PCCB		0	0.185254	0.109425	0.164879	0.140018	0	-0.0282638	0.0121913	-0.0389364	0.0246226	0	0.18913	0.0284015	0.129474	0.125635	0	0.291705	-0.0327982	0.245731	0.226886		0		0.159456	0.683087		0.0293049	0.0886101		0.125287	0.00473085		0.129291	0.599603
P35998|PRS7_HUMAN 26S proteasome regulatory subunit 7 OS=Homo sapiens OX=9606 GN=PSMC2 PE=1 SV=3	P35998	PSMC2		0	-0.0403315	0.00966649	-0.0468583	-0.0589609	0	-0.149593	-0.0322447	-0.448025	-0.652749	0	-0.192299	-0.148	-0.00704407	-0.0530363	0	-0.0730877	0.0750649	-0.0138137	0.0436251		0		-0.113828	0.683087		-0.0238783	0.0571589		-0.128935	0.00058492		-0.18028	0.257819
Q8NBU5|ATAD1_HUMAN ATPase family AAA domain-containing protein 1 OS=Homo sapiens OX=9606 GN=ATAD1 PE=1 SV=1	Q8NBU5	ATAD1		0	0.177469	0.164497	0.114012	0.0708574	0	0.0292719	-0.00166404	-0.0682427	0.191401	0	0.277701	0.200079	0.148944	0.111223	0	0.0786249	-0.200672	0.00746301	0.0617487		0		0.140767	0.683087		0.0405599	0.0567514		0.0505441	0.00058492		0.108807	0.599927
A0A2R8Y596|A0A2R8Y596_HUMAN Breast cancer anti-estrogen resistance protein 1 OS=Homo sapiens OX=9606 GN=BCAR1 PE=1 SV=1	A0A2R8Y596	BCAR1		0	0.23043	0.0280284	0.225976	0.20918	0	-0.022017	0.110321	-0.145471	0.331244	0	0.15472	-0.235302	0.180804	0.29066	0	0.372417	-0.0325355	0.0241845	0.0634004		0		0.183887	0.683087		-0.0323719	0.0556469		0.0713734	0.00058492		0.223621	0.785447
P55795|HNRH2_HUMAN Heterogeneous nuclear ribonucleoprotein H2 OS=Homo sapiens OX=9606 GN=HNRNPH2 PE=1 SV=1	P55795	HNRNPH2							0	0.219605	-0.248912	-0.311161	-0.0703479						0	0.564335	0.230779	0.648758	-0.0175887		0		0.39197	0.683087		-0.00906655	0.00449447		0.168798	0.00058492		-0.0439683	0.109576
Q49B96|COX19_HUMAN Cytochrome c oxidase assembly protein COX19 OS=Homo sapiens OX=9606 GN=COX19 PE=1 SV=1	Q49B96	COX19		0	0.162743	0.107414	0.0767953	0.0944058	0	0.0514763	0.0162194	0.0074321	0.169591	0	0.214193	0.160028	0.267211	0.350367	0	0.0531856	-0.0439967	0.082693	0.14601		0		0.1204	0.683087		0.0599162	0.165408		0.108533	0.00058492		0.190093	0.707884
P49458|SRP09_HUMAN Signal recognition particle 9 kDa protein OS=Homo sapiens OX=9606 GN=SRP9 PE=1 SV=2	P49458	SRP9		0	0.240811	0.106546	0.285107	0.207141	0	0.238362	-0.072285	-0.0284839	0.065076	0	0.0629459	-0.0315427	-0.00913451	0.13893	0	0.0269347	-0.027517	0.0619153	0.337321		0		0.142263	0.683087		-0.00619959	0.0168695		0.0773511	0.00058492		0.187117	0.679303
H0Y886|H0Y886_HUMAN NADH dehydrogenase [ubiquinone] 1 beta subcomplex subunit 5;mitochondrial (Fragment) OS=Homo sapiens OX=9606 GN=NDUFB5 PE=1 SV=1	H0Y886	NDUFB5		0	0.307751	-0.0531999	0.663068	0.524555	0	0.104522	0.0195442	-0.196837	0.114425	0	0.142886	-0.751969	-0.617709	-0.152333	0	0.0276827	-0.298414	0.271039	0.191289		0		0.14571	0.683087		-0.27101	0.239714		0.0298904	0.00058492		0.169484	0.27294
Q8TD30|ALAT2_HUMAN Alanine aminotransferase 2 OS=Homo sapiens OX=9606 GN=GPT2 PE=1 SV=1	Q8TD30	GPT2		0	0.217217	0.29862	0.221642	0.24525	0	0.0025297	-0.752469	-0.681436	-0.554091	0	0.153323	-0.0796136	-0.00571835	0.145468	0	0.129171	-0.276556	0.305131	0.203594		0		0.12556	0.683087		-0.202505	0.141504		-0.0400954	0.00058492		0.0100554	0.00683158
G3V4T6|G3V4T6_HUMAN Maleylacetoacetate isomerase OS=Homo sapiens OX=9606 GN=GSTZ1 PE=1 SV=1	G3V4T6	GSTZ1		0	0.0383377	-0.139626	-0.190261	-0.158333	0	0.22642	-0.00405475	-0.0464866	0.0226334	0	0.0494887	-0.116929	-0.0434944	0.020654	0	0.272915	-0.0715397	0.0825501	-0.148562		0		0.14679	0.683087		-0.0830372	0.26146		-0.0494229	0.00058492		-0.0659019	0.249995
Q9NUJ1|ABHDA_HUMAN Mycophenolic acid acyl-glucuronide esterase;mitochondrial OS=Homo sapiens OX=9606 GN=ABHD10 PE=1 SV=1	Q9NUJ1	ABHD10		0	0.342163	0.0110677	0.261498	-0.0743055	0	0.0519201	-0.0568519	-0.206798	0.0334237	0	0.123045	0.0648122	0.0652598	0.0446709	0	0.0975082	-0.224626	0.170849	0.0968422		0		0.153659	0.683087		-0.0513994	0.100949		0.0727021	0.00058492		0.0251578	0.0899226
Q13522|PPR1A_HUMAN Protein phosphatase 1 regulatory subunit 1A OS=Homo sapiens OX=9606 GN=PPP1R1A PE=1 SV=2	Q13522	PPP1R1A		0	0.189485	-0.0849238	-0.0161228	0.00623829	0	1.0681	0.253948	0.440009	0.634151	0	0.0386635	-0.256369	-0.0426345	0.100435	0	0.493702	0.515275	0.570468	0.666718		0		0.447486	0.683087		0.106982	0.0837745		0.23793	0.00058492		0.351886	0.486436
Q96HN2|SAHH3_HUMAN Adenosylhomocysteinase 3 OS=Homo sapiens OX=9606 GN=AHCYL2 PE=1 SV=1	Q96HN2	AHCYL2		0	0.119858	0.564255	-0.11388	0.120209	0	0.0383641	-0.231765	-0.216212	0.0478517	0	0.540023	0.666734	0.376888	0.214009	0	0.221189	0.0163166	0.217574	0.0879767		0		0.229858	0.683087		0.253885	0.181689		0.0660923	0.00058492		0.117512	0.598011
Q9Y623|MYH4_HUMAN Myosin-4 OS=Homo sapiens OX=9606 GN=MYH4 PE=2 SV=2	Q9Y623	MYH4		0	-0.123959	0.186679	-0.208007	-0.0215465	0	0.462222	0.399498	0.184852	0.437897	0	0.429188	1.28243	-0.212719	0.619007	0	0.937189	1.68168	1.76803	0.682732		0		0.42616	0.683087		0.887571	0.431938		0.38304	0.00058492		0.429523	0.657097
B4DL54|B4DL54_HUMAN CHURC1-FNTB readthrough OS=Homo sapiens OX=9606 GN=CHURC1-FNTB PE=2 SV=1	B4DL54	CHURC1-FNTB		0	-0.041056	0.0898557	-0.133539	0.044105	0	0.373224	0.461293	0.386836	0.506353	0	0.18108	0.200432	0.0949801	0.158404	0	0.612334	0.124069	0.45276	0.12042		0		0.281395	0.683087		0.218913	0.417768		0.200259	0.00058492		0.207321	0.475742
Q86TN4|TRPT1_HUMAN tRNA 2'-phosphotransferase 1 OS=Homo sapiens OX=9606 GN=TRPT1 PE=1 SV=2	Q86TN4	TRPT1		0	0.155881	0.128232	-0.105341	-0.0417239	0	-0.0405769	0.0550665	-0.195421	0.278708	0	0.294787	0.237856	0.349285	0.281893	0	0.30069	0.0646531	0.283939	0.21013		0		0.177695	0.683087		0.121452	0.394969		0.0831155	0.00058492		0.182252	0.539432
Q8IY18|SMC5_HUMAN Structural maintece of chromosomes protein 5 OS=Homo sapiens OX=9606 GN=SMC5 PE=1 SV=2	Q8IY18	SMC5		0	0.362837	-0.0486616	0.116576	-0.109776	0	-0.000703876	0.253027	0.15744	0.466046	0	0.140308	0.0629502	0.282686	0.358079	0	0.173856	0.237645	0.192622	0.481678		0		0.169075	0.683087		0.12624	0.243011		0.187331	0.199651		0.299007	0.507451
P08754|GNAI3_HUMAN Guanine nucleotide-binding protein G(k) subunit alpha OS=Homo sapiens OX=9606 GN=GNAI3 PE=1 SV=3	P08754	GNAI3		0	-0.319294	-0.373046	-0.301706	-0.0840864	0					0	-0.114016	-0.0282654	-0.268013	-0.161842							0		-0.216655	0.683087		-0.200656	0.231848		-0.284859	0.159453		-0.122964	0.444266
Q96RP9|EFGM_HUMAN Elongation factor G;mitochondrial OS=Homo sapiens OX=9606 GN=GFM1 PE=1 SV=2	Q96RP9	GFM1		0	0.0920463	-0.0295994	0.0714753	0.0809801	0	0.0980066	0.101439	-0.105751	0.146528	0	0.109338	-0.0299404	0.118053	0.0947981	0	0.065125	-0.123578	-0.0229065	0.190765		0		0.091129	0.683087		-0.0204195	0.0499901		0.0152178	0.00058492		0.128268	0.722395
P46976|GLYG_HUMAN Glycogenin-1 OS=Homo sapiens OX=9606 GN=GYG1 PE=1 SV=4	P46976	GYG1		0	0.107155	-0.460862	-0.211926	-0.720655	0	0.118658	-0.32208	-0.0542654	-0.498405	0	0.722741	0.193302	0.903089	0.345268	0	1.36007	0.325539	1.26326	0.502617		0		0.577156	0.683087		-0.0660252	0.0447773		0.475039	0.00058492		-0.0927937	0.0474827
Q9H299|SH3L3_HUMAN SH3 domain-binding glutamic acid-rich-like protein 3 OS=Homo sapiens OX=9606 GN=SH3BGRL3 PE=1 SV=1	Q9H299	SH3BGRL3		0	-0.0332282	0.388672	0.047987	0.251918	0	1.03821	0.255687	0.622289	0.622454	0	0.160901	0.676012	-0.00950588	0.244708	0	0.861826	0.441917	0.759749	0.513484		0		0.506928	0.683087		0.440572	1.07383		0.35513	0.0310878		0.408141	0.900496
Q9HDC9|APMAP_HUMAN Adipocyte plasma membrane-associated protein OS=Homo sapiens OX=9606 GN=APMAP PE=1 SV=2	Q9HDC9	APMAP		0	-0.0521377	0.070146	-0.141593	-0.0271283	0	0.395872	-0.0491525	-0.206343	-0.00144645	0	0.157066	0.0575566	0.0938761	0.0463782	0	0.404472	-0.0169325	0.513395	0.054863		0		0.226318	0.683087		0.0154044	0.0491123		0.0648335	0.00058492		0.0181666	0.0809697
H3BR70|H3BR70_HUMAN Pyruvate kinase OS=Homo sapiens OX=9606 GN=PKM PE=1 SV=1	H3BR70	PKM		0	-0.173375	-0.193871	-0.0908664	-0.148039	0	0.0472568	0.157936	-0.0875902	-0.0581196	0	-0.462267	-0.344326	-0.211046	-0.429753	0	-0.680407	0.265835	-0.376777	0.0819152		0		-0.317198	0.683087		-0.0286065	0.0269207		-0.19157	0.112029		-0.138499	0.287492
P00748|FA12_HUMAN Coagulation factor XII OS=Homo sapiens OX=9606 GN=F12 PE=1 SV=3	P00748	F12		0	-0.08699	0.310445	-0.335698	0.377486	0	0.961497	0.435145	0.742704	0.213069	0	0.229143	0.309717	0.0740673	0.038493	0	0.699159	0.411335	0.595466	0.150957		0		0.450702	0.683087		0.366661	1.68856		0.269135	0.00058492		0.195001	0.612205
Q9BQ69|MACD1_HUMAN O-acetyl-ADP-ribose deacetylase MACROD1 OS=Homo sapiens OX=9606 GN=MACROD1 PE=1 SV=2	Q9BQ69	MACROD1		0	-0.069598	-0.144291	-0.179679	-0.155336	0	-0.323814	-0.148816	-0.135478	-0.193331	0	-0.00626627	-0.106586	-0.0141686	-0.0807516	0	-0.323777	-0.148846	-0.142371	-0.0845214		0		-0.180864	0.683087		-0.137135	0.901391		-0.117924	0.0396233		-0.128485	0.707884
P22234|PUR6_HUMAN Multifunctional protein ADE2 OS=Homo sapiens OX=9606 GN=PAICS PE=1 SV=3	P22234	PAICS		0	0.0372546	0.173683	0.0372256	0.0712987	0	0.0745832	0.0370892	-0.0663153	0.0193067	0	0.145258	0.10893	0.105886	0.0882451	0	0.160265	0.0923256	0.326961	0.118936		0		0.10434	0.683087		0.103007	0.417768		0.100939	0.00058492		0.0744467	0.461303
Q06323|PSME1_HUMAN Proteasome activator complex subunit 1 OS=Homo sapiens OX=9606 GN=PSME1 PE=1 SV=1	Q06323	PSME1		0	-0.0558678	0.0445787	-0.242109	-0.139681	0	0.24381	0.126287	0.144261	-0.0776077	0	0.207202	0.16665	0.203002	0.0610429	0	0.379037	0.0204942	0.185433	0.0278395		0		0.193545	0.683087		0.0895026	0.26573		0.0726464	0.00058492		-0.0321017	0.102816
P02776|PLF4_HUMAN Platelet factor 4 OS=Homo sapiens OX=9606 GN=PF4 PE=1 SV=2	P02776	PF4		0	-0.00686646	0.595342	0.0555786	0.591235	0	2.82732	0.685917	1.21741	0.0617086	0	0.369015	2.11099	-0.227765	-0.0537957	0	1.7472	-0.629572	-0.027402	-0.784714		0		1.23417	0.683087		0.690669	0.195734		0.254454	0.00058492		-0.0463914	0.0215087
P55786|PSA_HUMAN Puromycin-sensitive aminopeptidase OS=Homo sapiens OX=9606 GN=NPEPPS PE=1 SV=2	P55786	NPEPPS		0	0.0547472	-0.0447421	0.137716	-0.179824	0	-0.211323	0.134698	0.42235	0.085246	0	-0.290352	-0.225023	0.0230613	-0.0344574	0	-0.231508	-0.311479	-0.748786	-0.100702		0		-0.169609	0.683087		-0.111636	0.165408		-0.0414147	0.00058492		-0.0574343	0.190338
O15173|PGRC2_HUMAN Membrane-associated progesterone receptor component 2 OS=Homo sapiens OX=9606 GN=PGRMC2 PE=1 SV=1	O15173	PGRMC2		0	0.0563541	0.00872836	0.0466813	0.139523	0	0.106964	0.17866	-0.160971	0.178227	0	0.0792984	-0.0610777	0.187388	0.124487	0	0.284829	0.0770211	0.245699	0.263384		0		0.131862	0.683087		0.050833	0.128105		0.0796994	0.00058492		0.176405	0.900496
H0UI06|H0UI06_HUMAN Cytochrome c oxidase subunit 7A2;mitochondrial OS=Homo sapiens OX=9606 GN=COX7A2 PE=1 SV=1	H0UI06	COX7A2		0	0.116035	-0.103851	0.149204	0.1313	0					0	0.261482	0.242356	0.272246	-0.0595978							0		0.188759	0.683087		0.0692521	0.0698257		0.210725	0.0792582		0.035851	0.0693129
G8JLA2|G8JLA2_HUMAN Myosin light polypeptide 6 OS=Homo sapiens OX=9606 GN=MYL6 PE=1 SV=1	G8JLA2	MYL6							0	0.20577	0.126782	-0.489906	-0.221148						0	0.562514	-0.0373896	0.639127	0.31601		0		0.384142	0.683087		0.0446961	0.0606958		0.0746102	0.00058492		0.0474314	0.0271958
O95183|VAMP5_HUMAN Vesicle-associated membrane protein 5 OS=Homo sapiens OX=9606 GN=VAMP5 PE=1 SV=1	O95183	VAMP5		0	0.0729609	-0.0817895	0.032743	0.0392337	0	0.126097	0.0430272	-0.139887	-0.0299325	0	0.067075	-0.0439477	0.161231	0.150787	0	0.350696	0.0271128	0.40799	0.213312		0		0.154207	0.683087		-0.0138993	0.0429424		0.115519	0.00058492		0.09335	0.347259
Q05932|FOLC_HUMAN Folylpolyglutamate synthase;mitochondrial OS=Homo sapiens OX=9606 GN=FPGS PE=1 SV=3	Q05932	FPGS		0	-0.424921	-0.227356	-0.867889	-0.215472	0					0	-0.110997	-0.346155	0.0305258	0.085186							0		-0.267959	0.683087		-0.286755	0.678022		-0.418682	0.00058492		-0.065143	0.101541
P28066|PSA5_HUMAN Proteasome subunit alpha type-5 OS=Homo sapiens OX=9606 GN=PSMA5 PE=1 SV=3	P28066	PSMA5		0	0.136738	0.205828	0.00649222	0.214978	0	0.223603	-0.0124789	-0.150443	-0.219255	0	-0.0231286	-0.0390746	0.0695816	0.0530208	0	0.224872	-0.00987213	0.17473	0.171005		0		0.140521	0.683087		0.0361007	0.073376		0.0250901	0.00058492		0.0549369	0.0957416
Q969Z0|FAKD4_HUMAN FAST kinase domain-containing protein 4 OS=Homo sapiens OX=9606 GN=TBRG4 PE=1 SV=1	Q969Z0	TBRG4		0	0.20945	0.00850598	0.196251	0.108822	0	-0.0589315	-0.0358885	-0.170153	0.0974609	0	0.299486	0.0497687	0.104973	0.127105	0	0.244481	0.00933031	0.240645	0.234283		0		0.173621	0.683087		0.00792912	0.0284203		0.0929291	0.00058492		0.141918	0.733658
O95445|APOM_HUMAN Apolipoprotein M OS=Homo sapiens OX=9606 GN=APOM PE=1 SV=2	O95445	APOM		0	0.219478	1.0534	0.226497	1.02869	0					0	1.31479	1.50401	0.643431	0.546105							0		0.767132	0.683087		1.2787	1.24174		0.434964	0.138933		0.787396	0.839068
P02748|CO9_HUMAN Complement component C9 OS=Homo sapiens OX=9606 GN=C9 PE=1 SV=2	P02748	C9		0	-0.116649	0.237989	-0.0955444	0.42695	0	0.627684	0.13087	0.139825	-0.0336434	0	0.281201	0.529593	0.287853	0.430147	0	0.439383	0.04042	0.448696	-0.1157		0		0.307905	0.683087		0.234718	0.353349		0.195208	0.00473085		0.176938	0.27225
P30419|NMT1_HUMAN Glycylpeptide N-tetradecanoyltransferase 1 OS=Homo sapiens OX=9606 GN=NMT1 PE=1 SV=2	P30419	NMT1		0	0.21607	0.25206	0.310736	0.209884	0	-0.0250119	-0.0538354	-0.143795	0.0556855	0	0.13283	0.0791396	-0.194074	-0.0673333	0	0.283715	0.107608	0.270546	0.2822		0		0.151901	0.683087		0.096243	0.213307		0.0608532	0.00058492		0.120109	0.334608
P05387|RLA2_HUMAN 60S acidic ribosomal protein P2 OS=Homo sapiens OX=9606 GN=RPLP2 PE=1 SV=1	P05387	RPLP2		0	0.0147836	0.0992511	0.162843	0.167322	0	-0.112667	-0.135144	-0.386544	-0.300974	0	-0.428639	-0.239015	-0.11879	-0.120371	0	-0.644884	-0.14503	-0.342629	-0.0731615		0		-0.292852	0.683087		-0.104984	0.210384		-0.17128	0.00058492		-0.0817961	0.168712
Q96GD0|PLPP_HUMAN Pyridoxal phosphate phosphatase OS=Homo sapiens OX=9606 GN=PDXP PE=1 SV=2	Q96GD0	PDXP		0	0.0272452	0.102687	-0.00845683	0.0339868	0	0.0921298	-0.0316512	-0.118198	0.140469	0	0.226718	0.11895	0.0633516	0.107651	0	0.477798	0.0550985	0.312586	0.148002		0		0.205973	0.683087		0.0612708	0.208553		0.0623207	0.00058492		0.107527	0.618577
P12429|ANXA3_HUMAN Annexin A3 OS=Homo sapiens OX=9606 GN=ANXA3 PE=1 SV=3	P12429	ANXA3		0	0.0893557	-0.0715178	0.138467	0.0686219	0	0.546871	0.0095236	-0.181308	-0.0178432	0	-0.0132453	0.00397317	-0.0321559	0.0862924	0	0.465871	-0.176405	0.736108	0.263567		0		0.272213	0.683087		-0.0586064	0.1688		0.165278	0.00058492		0.10016	0.351258
P32969|RL9_HUMAN 60S ribosomal protein L9 OS=Homo sapiens OX=9606 GN=RPL9 PE=1 SV=1	P32969	RPL9		0	0.0532427	0.156469	0.0857552	0.141386	0	0.188282	0.01573	-0.0808857	0.149525	0	0.0371857	-0.0567374	-0.0641314	0.0150635	0	0.302357	0.120416	0.272079	0.113719		0		0.145267	0.683087		0.0589693	0.154128		0.0532044	0.00058492		0.104923	0.579474
K7EIK7|K7EIK7_HUMAN Echinoderm microtubule-associated protein-like 2 OS=Homo sapiens OX=9606 GN=EML2 PE=1 SV=1	K7EIK7	EML2		0	0.194414	0.257214	0.153661	0.177439	0	-0.0596008	-0.0202957	-0.120732	0.106967	0	0.263681	0.159546	0.136449	0.0383551	0	0.346588	-0.219808	0.191561	0.10776		0		0.18627	0.683087		0.0441643	0.0556469		0.0902347	0.00058492		0.10763	0.601757
Q14764|MVP_HUMAN Major vault protein OS=Homo sapiens OX=9606 GN=MVP PE=1 SV=4	Q14764	MVP		0	0.110593	-0.0612147	-0.0314674	0.0260179	0	0.0526056	-0.195659	-0.147428	-0.000348906	0	0.169508	0.0492099	0.189258	0.376398	0	0.512477	0.348307	0.487899	0.0604179		0		0.211296	0.683087		0.0351608	0.0397827		0.124565	0.00058492		0.115621	0.289047
Q9NTJ4|MA2C1_HUMAN Alpha-mannosidase 2C1 OS=Homo sapiens OX=9606 GN=MAN2C1 PE=1 SV=1	Q9NTJ4	MAN2C1		0	0.158694	0.0634638	0.00520296	-0.0587362	0	0.112384	0.16268	-0.130037	0.230243	0	0.000490843	-0.0764145	0.0412459	0.119786	0	0.250043	-0.0896607	0.140515	0.3123		0		0.130403	0.683087		0.0150172	0.0285961		0.0142318	0.00058492		0.150898	0.423788
P03905|NU4M_HUMAN NADH-ubiquinone oxidoreductase chain 4 OS=Homo sapiens OX=9606 GN=MT-ND4 PE=1 SV=1	P03905	MT-ND4		0	0.212998	-0.137321	0.142476	0.0359573	0	0.0433364	0.34189	0.031956	0.353213	0	0.0573366	-0.130505	0.00460847	0.147473	0	0.145574	-0.064243	0.25185	0.569352		0		0.114811	0.683087		0.00245524	0.00186199		0.107723	0.00058492		0.276499	0.564479
Q96MG8|PCMD1_HUMAN Protein-L-isoaspartate O-methyltransferase domain-containing protein 1 OS=Homo sapiens OX=9606 GN=PCMTD1 PE=1 SV=2	Q96MG8	PCMTD1		0	0.170496	0.0942302	-0.00852022	0.0395354	0					0	0.143068	-0.013087	0.0924447	0.138084							0		0.156782	0.683087		0.0405716	0.0837745		0.0419622	0.00058492		0.0888098	0.30465
Q8NEZ2|VP37A_HUMAN Vacuolar protein sorting-associated protein 37A OS=Homo sapiens OX=9606 GN=VPS37A PE=1 SV=1	Q8NEZ2	VPS37A		0	-0.101662	0.086862	-0.0343594	-0.0963923	0	0.774982	0.271911	0.419823	-0.0673843	0	0.21058	0.255628	0.293562	0.278311	0	0.70462	-0.56517	0.37557	-0.745648		0		0.39713	0.683087		0.0123078	0.00788115		0.263649	0.123971		-0.157778	0.147988
P54727|RD23B_HUMAN UV excision repair protein RAD23 homolog B OS=Homo sapiens OX=9606 GN=RAD23B PE=1 SV=1	P54727	RAD23B		0	-0.0854846	-0.193368	-0.180659	-0.106554	0	-0.866783	-0.155923	0.504316	0.337065	0	-0.47198	-0.302803	-0.146742	-0.138939	0	-0.0405345	-0.330947	-0.541255	-0.300845		0		-0.366195	0.683087		-0.24576	1.0603		-0.0910847	0.00058492		-0.0523183	0.0623924
A0A0A0MTS7|A0A0A0MTS7_HUMAN Titin OS=Homo sapiens OX=9606 GN=TTN PE=1 SV=1	A0A0A0MTS7	TTN		0	0.475686	0.437022	0.395863	0.480957	0	1.31881	0.435332	0.0458294	-0.0714497	0	-0.132995	0.258589	-0.276957	0.269301	0	0.575268	1.44338	1.71216	0.945769		0		0.559193	0.683087		0.643581	0.409241		0.469223	0.00058492		0.406144	0.461303
G3V5Z7|G3V5Z7_HUMAN Proteasome subunit alpha type OS=Homo sapiens OX=9606 GN=PSMA6 PE=1 SV=1	G3V5Z7	PSMA6		0	0.0510524	-0.0118107	-0.082625	0.020229	0	-0.566132	-0.108397	0.171539	-0.249607	0	-0.372798	-0.286924	-0.13295	-0.17588	0	-1.41749	-0.220585	-0.27945	-0.144228		0		-0.576342	0.683087		-0.156929	0.393494		-0.0808714	0.00058492		-0.137371	0.50347
P00558|PGK1_HUMAN Phosphoglycerate kinase 1 OS=Homo sapiens OX=9606 GN=PGK1 PE=1 SV=3	P00558	PGK1		0	-0.221243	-0.362332	-0.380947	-0.362352	0	-0.43004	-0.0459495	0.387252	0.396316	0	-0.143785	-0.367598	-0.0602047	-0.155701	0	0.0199713	-0.057591	-0.641758	-0.0354292		0		-0.193774	0.683087		-0.208368	0.376384		-0.173914	0.00058492		-0.0392917	0.0344998
P61224|RAP1B_HUMAN Ras-related protein Rap-1b OS=Homo sapiens OX=9606 GN=RAP1B PE=1 SV=1	P61224	RAP1B		0	-0.0157493	0.328164	-0.256985	0.112412	0	0.361697	-0.138336	0.0725408	0.167275	0	0.390698	1.09939	0.468513	0.186313	0	0.0860075	-0.00514826	0.186832	0.417488		0		0.205663	0.683087		0.321017	0.181502		0.117725	0.00058492		0.220872	0.707884
P07996|TSP1_HUMAN Thrombospondin-1 OS=Homo sapiens OX=9606 GN=THBS1 PE=1 SV=2	P07996	THBS1		0	-0.130665	0.273187	-0.244227	0.36284	0	1.22289	0.0264244	0.389221	-0.0218202	0	0.295995	2.20817	0.463094	0.0362093	0	0.846547	-0.196931	-0.0103088	-0.220024		0		0.558692	0.683087		0.577712	0.162951		0.149445	0.00058492		0.0393014	0.0495022
E9PHG3|E9PHG3_HUMAN Histone-lysine N-methyltransferase SMYD1 OS=Homo sapiens OX=9606 GN=SMYD1 PE=1 SV=1	E9PHG3	SMYD1							0	0.167832	-0.102807	-0.411584	-0.138991						0	0.298698	-0.0294587	-0.0137916	0.045061		0		0.233265	0.683087		-0.0661329	0.133223		-0.212688	0.00058492		-0.046965	0.0731163
Q96RQ3|MCCA_HUMAN Methylcrotonoyl-CoA carboxylase subunit alpha;mitochondrial OS=Homo sapiens OX=9606 GN=MCCC1 PE=1 SV=3	Q96RQ3	MCCC1		0	0.089759	0.0478044	0.104795	0.0113155	0	0.189516	0.0770359	-0.0362752	0.180771	0	0.105356	-0.0777244	0.066662	0.0762279	0	0.0337307	-0.234855	0.0559399	0.251083		0		0.10459	0.683087		-0.0469348	0.0837745		0.0477805	0.00058492		0.129849	0.503036
F5H5P2|F5H5P2_HUMAN 2-oxoisovalerate dehydrogenase subunit alpha OS=Homo sapiens OX=9606 PE=3 SV=1	F5H5P2			0	0.165515	0.0442246	0.0793411	-0.00943295	0	0.0259093	0.0533748	-0.0372103	0.168767	0	0.0844123	0.00112088	0.0602114	0.0633382	0	0.136558	-0.0107265	0.12173	0.333223		0		0.103099	0.683087		0.0219984	0.0837745		0.056018	0.00058492		0.138974	0.416124
Q92598|HS105_HUMAN Heat shock protein 105 kDa OS=Homo sapiens OX=9606 GN=HSPH1 PE=1 SV=1	Q92598	HSPH1		0	0.0476792	-0.095661	-0.0264181	-0.207237	0	0.148872	0.0156134	-0.0243377	0.166334	0	0.0687765	0.0314464	0.154903	0.0799712	0	0.344999	-0.0466621	0.220613	0.0443113		0		0.152582	0.683087		-0.0238158	0.073021		0.0811901	0.00058492		0.0208448	0.0344998
P46060|RAGP1_HUMAN Ran GTPase-activating protein 1 OS=Homo sapiens OX=9606 GN=RANGAP1 PE=1 SV=1	P46060	RANGAP1		0	-0.0218288	0.0608547	0.0145948	0.00895661	0	0.162686	0.059666	-0.00665853	0.157118	0	0.192227	0.0727922	0.0807888	-0.0105941	0	0.421513	-0.399752	0.381786	0.26278		0		0.188649	0.683087		-0.0516097	0.0586173		0.117628	0.00058492		0.104565	0.341913
P62851|RS25_HUMAN 40S ribosomal protein S25 OS=Homo sapiens OX=9606 GN=RPS25 PE=1 SV=1	P62851	RPS25		0	-0.0308562	-0.0491497	0.045639	0.00561458	0	-0.255639	0.0907238	-0.503659	0.0627917	0	-0.0722238	-0.217064	-0.0257892	0.042317	0	-0.489932	0.0777659	-0.571001	-0.0287891		0		-0.212163	0.683087		-0.024431	0.0423597		-0.263703	0.00473085		0.0204836	0.0941817
H0YNC7|H0YNC7_HUMAN Tropomyosin alpha-1 chain (Fragment) OS=Homo sapiens OX=9606 GN=TPM1 PE=1 SV=1	H0YNC7	TPM1		0	0.347271	0.0140624	0.441278	0.172496	0	0.664169	0.358756	-0.57323	-0.0195378	0	0.010033	-0.106703	-0.0898211	0.100847	0	0.10777	-0.165301	-0.104996	-0.41575		0		0.282311	0.683087		0.0252037	0.0284107		-0.0816924	0.00058492		-0.0404861	0.0469063
O15371|EIF3D_HUMAN Eukaryotic translation initiation factor 3 subunit D OS=Homo sapiens OX=9606 GN=EIF3D PE=1 SV=1	O15371	EIF3D		0	0.0665783	0.0338854	0.0693719	0.0849129	0	0.0699298	0.205558	-0.00581688	0.267589	0	0.0888684	0.0224091	0.0759434	0.192661	0	0.139728	0.0796979	0.106297	0.0462346		0		0.0912761	0.683087		0.0853875	0.244194		0.0614489	0.00058492		0.147849	0.599927
Q9BZE9|ASPC1_HUMAN Tether containing UBX domain for GLUT4 OS=Homo sapiens OX=9606 GN=ASPSCR1 PE=1 SV=1	Q9BZE9	ASPSCR1		0	0.00552435	-0.108016	0.042027	0.106275	0	0.126633	-0.141577	-0.227736	0.133673	0	0.17273	0.0803157	0.112067	0.286802	0	0.415342	0.0615208	0.322267	-0.0450625		0		0.180057	0.683087		-0.0269392	0.0556469		0.0621562	0.00058492		0.120422	0.385911
I3L213|I3L213_HUMAN Phosphorylase b kinase regulatory subunit (Fragment) OS=Homo sapiens OX=9606 GN=PHKB PE=1 SV=1	I3L213	PHKB							0	0.164854	0.0378508	-0.46217	0.0801272						0	0.339138	-0.077701	-0.334845	-0.375509		0		0.251996	0.683087		-0.0199251	0.0304944		-0.398508	0.159453		-0.147691	0.140684
Q9BXS5|AP1M1_HUMAN AP-1 complex subunit mu-1 OS=Homo sapiens OX=9606 GN=AP1M1 PE=1 SV=3	Q9BXS5	AP1M1		0	0.00584756	0.138694	0.00983875	0.0964264	0	0.0962118	-0.347186	0.0164633	0.141072	0	0.157996	0.111758	0.24698	0.246981	0	0.211271	-0.249222	0.0315644	0.0741671		0		0.117832	0.683087		-0.0864891	0.0892023		0.0762117	0.00058492		0.139662	0.673108
P46776|RL27A_HUMAN 60S ribosomal protein L27a OS=Homo sapiens OX=9606 GN=RPL27A PE=1 SV=2	P46776	RPL27A		0	-0.171855	-0.0724686	-0.0700707	-0.123688	0	-0.353527	0.1332	0.13799	0.387801	0	-0.0824604	-0.217865	-0.0613197	-0.0762248	0	-0.0227969	0.0955018	-0.545694	0.0700094		0		-0.15766	0.683087		-0.015408	0.0235726		-0.134773	0.00058492		0.0644743	0.0960891
P13598|ICAM2_HUMAN Intercellular adhesion molecule 2 OS=Homo sapiens OX=9606 GN=ICAM2 PE=1 SV=2	P13598	ICAM2		0	0.0354316	0.08678	0.0188123	0.117155	0	0.102245	-0.408587	-0.22021	0.113022	0	0.0916752	0.364454	0.185568	0.262425	0	0.162256	-0.0462105	0.368685	0.0912751		0		0.0979019	0.683087		-0.000890885	0.000866514		0.0882138	0.00058492		0.145969	0.690801
P01008|ANT3_HUMAN Antithrombin-III OS=Homo sapiens OX=9606 GN=SERPINC1 PE=1 SV=1	P01008	SERPINC1		0	0.176326	0.284212	0.125924	0.496358	0	0.400211	-0.0325098	0.09951	-0.00540345	0	0.354669	0.356684	0.113723	0.268477	0	-0.0744575	0.0215975	0.0866582	-0.0210366		0		0.214187	0.683087		0.157496	0.242901		0.106454	0.0586894		0.184599	0.34335
Q5T5H1|Q5T5H1_HUMAN Alpha-endosulfine OS=Homo sapiens OX=9606 GN=ENSA PE=1 SV=1	Q5T5H1	ENSA		0	-0.14513	-0.152286	-0.0712699	-0.114339	0	-0.58493	0.0407068	-0.562683	-0.363456	0	0.0636207	-0.0569045	0.0572715	0.0732464	0	-0.733872	-0.277685	-0.107485	0.198601		0		-0.350078	0.683087		-0.111542	0.231848		-0.171042	0.00058492		-0.0514869	0.0672187
Q8WWV3|RT4I1_HUMAN Reticulon-4-interacting protein 1;mitochondrial OS=Homo sapiens OX=9606 GN=RTN4IP1 PE=1 SV=2	Q8WWV3	RTN4IP1		0	0.198327	0.0678116	0.112229	0.143574	0	0.0662778	0.0496055	-0.185967	0.106666	0	0.123667	0.0819592	0.0553922	0.0932826	0	0.0385354	0.0057966	0.0427677	0.168414		0		0.106702	0.683087		0.0512932	0.2244		0.00610547	0.00058492		0.127984	0.817797
Q15124|PGM5_HUMAN Phosphoglucomutase-like protein 5 OS=Homo sapiens OX=9606 GN=PGM5 PE=1 SV=2	Q15124	PGM5		0	0.308303	0.354625	0.310463	0.241567	0	-0.0121509	-0.264071	-0.275842	0.000110755	0	0.12563	0.0446908	-0.130352	-0.0169601	0	0.164725	-0.292307	0.11642	0.0985939		0		0.146627	0.683087		-0.0392655	0.0336151		0.0051723	0.00058492		0.080828	0.27431
P01011|AACT_HUMAN Alpha-1-antichymotrypsin OS=Homo sapiens OX=9606 GN=SERPINA3 PE=1 SV=2	P01011	SERPINA3		0	0.0178877	0.457704	0.013929	0.620351	0	0.675205	0.302745	0.383331	-0.94613	0	0.581996	0.764811	0.109972	0.401344	0	0.0360821	0.216603	0.32353	-0.216983		0		0.327793	0.683087		0.435466	0.71059		0.207691	0.0868876		-0.0353544	0.013987
Q9UN86|G3BP2_HUMAN Ras GTPase-activating protein-binding protein 2 OS=Homo sapiens OX=9606 GN=G3BP2 PE=1 SV=2	Q9UN86	G3BP2		0	0.172623	0.0524959	0.142168	0.111261	0	0.424864	-0.0962761	-0.122264	-0.00281759	0	-0.0767251	-0.309953	-0.0377959	0.0258661	0	0.362871	-0.258431	0.515598	0.13898		0		0.220908	0.683087		-0.153041	0.249067		0.124426	0.00058492		0.0683223	0.341913
P61160|ARP2_HUMAN Actin-related protein 2 OS=Homo sapiens OX=9606 GN=ACTR2 PE=1 SV=1	P61160	ACTR2		0	-0.0505409	0.0314931	-0.172141	-0.0768981	0	0.178422	-0.0716828	-0.209706	0.0513894	0	0.291452	0.282118	0.249308	0.196733	0	0.560655	0.0398711	0.54505	0.061169		0		0.244997	0.683087		0.0704498	0.133223		0.103128	0.00058492		0.0580982	0.195286
Q3LXA3|TKFC_HUMAN Triokinase/FMN cyclase OS=Homo sapiens OX=9606 GN=TKFC PE=1 SV=2	Q3LXA3	TKFC		0	-0.00521875	0.108608	-0.0962545	-0.042043	0	0.182434	0.0620601	0.121946	0.189028	0	0.135548	0.126528	0.164958	0.154165	0	0.441239	0.100722	0.365038	0.162488		0		0.188501	0.683087		0.0994794	0.498969		0.138922	0.00058492		0.11591	0.449515
Q567U6|CCD93_HUMAN Coiled-coil domain-containing protein 93 OS=Homo sapiens OX=9606 GN=CCDC93 PE=1 SV=2	Q567U6	CCDC93		0	-0.151443	-0.163296	-0.278253	-0.465242	0					0	-0.147987	-0.228173	0.0110345	0.00615172							0		-0.149715	0.683087		-0.195734	0.498969		-0.133609	0.00058492		-0.229545	0.302766
P04003|C4BPA_HUMAN C4b-binding protein alpha chain OS=Homo sapiens OX=9606 GN=C4BPA PE=1 SV=2	P04003	C4BPA		0	0.122679	0.382618	-0.141423	0.463677	0					0	0.726811	1.03044	0.0885477	0.204801							0		0.424745	0.683087		0.706528	0.471202		-0.0264379	0.00058492		0.334239	0.673108
Q9NR50|EI2BG_HUMAN Translation initiation factor eIF-2B subunit gamma OS=Homo sapiens OX=9606 GN=EIF2B3 PE=1 SV=1	Q9NR50	EIF2B3		0	0.16192	0.239183	0.0719868	0.145718	0	-0.0045123	0.0176087	-0.20638	0.116724	0	0.119059	0.15735	0.14677	0.0512992	0	0.353675	0.26374	0.253197	0.181869		0		0.157535	0.683087		0.16947	0.469532		0.0663935	0.00058492		0.123902	0.690801
Q9H3K2|GHITM_HUMAN Growth hormone-inducible transmembrane protein OS=Homo sapiens OX=9606 GN=GHITM PE=1 SV=2	Q9H3K2	GHITM		0	-0.152101	-0.155539	-0.00056761	-0.0305756	0	-0.0210784	0.0458709	-0.148673	0.100336	0	-0.282098	-0.220085	-0.114033	-0.0988631	0	-0.77348	-0.366627	-0.388343	-0.103495		0		-0.307189	0.683087		-0.174095	0.26573		-0.162904	0.0135242		-0.0331496	0.104092
Q9H845|ACAD9_HUMAN Acyl-CoA dehydrogenase family member 9;mitochondrial OS=Homo sapiens OX=9606 GN=ACAD9 PE=1 SV=1	Q9H845	ACAD9		0	0.0440481	-0.0664766	0.0533497	0.0640156	0	0.197928	-0.0539605	-0.128284	0.100419	0	0.0460017	-0.0469496	0.117389	0.12763	0	0.14493	-0.271214	0.313749	0.148748		0		0.108227	0.683087		-0.10965	0.249067		0.0890509	0.00058492		0.110203	0.697991
Q8TEB1|DCA11_HUMAN DDB1- and CUL4-associated factor 11 OS=Homo sapiens OX=9606 GN=DCAF11 PE=1 SV=1	Q8TEB1	DCAF11		0	0.322261	1.07338	0.385694	0.716446	0	-0.0539092	-0.112835	-0.097297	0.0363584	0	0.719821	0.779594	0.627187	0.600393	0	0.21419	-0.0713108	0.160238	0.292777		0		0.300591	0.683087		0.417207	0.214944		0.268955	0.00982757		0.411494	0.646007
Q4G176|ACSF3_HUMAN Acyl-CoA synthetase family member 3;mitochondrial OS=Homo sapiens OX=9606 GN=ACSF3 PE=1 SV=3	Q4G176	ACSF3		0	0.104869	0.250892	0.0288946	0.0513177	0	-0.00700177	0.014929	-0.102793	0.123167	0	0.365759	0.349977	0.280767	0.273763	0	0.192712	-0.156275	0.156682	0.197903		0		0.164084	0.683087		0.114881	0.148548		0.0908877	0.00058492		0.161538	0.673108
P18859|ATP5J_HUMAN ATP synthase-coupling factor 6;mitochondrial OS=Homo sapiens OX=9606 GN=ATP5J PE=1 SV=1	P18859	ATP5J		0	-0.0666803	0.0300117	0.116381	-0.169956	0	-0.0869862	0.170276	-0.87342	-0.662954	0	-0.0825167	-0.161864	-0.0972786	-0.405096	0	-0.103002	-0.639699	-0.357572	-0.465085		0		-0.0847962	0.683087		-0.150319	0.125967		-0.302972	0.00058492		-0.425773	0.900496
P46940|IQGA1_HUMAN Ras GTPase-activating-like protein IQGAP1 OS=Homo sapiens OX=9606 GN=IQGAP1 PE=1 SV=1	P46940	IQGAP1		0	0.121009	0.0561329	0.100972	0.00578748	0	0.0666036	-0.164802	-0.248179	-0.0228953	0	0.043415	-0.0509582	-0.202851	-0.0543699	0	0.283744	-0.00505745	0.303614	0.131924		0		0.128693	0.683087		-0.0411713	0.100949		-0.0116109	0.00058492		0.0151116	0.0440309
Q13405|RM49_HUMAN 39S ribosomal protein L49;mitochondrial OS=Homo sapiens OX=9606 GN=MRPL49 PE=1 SV=1	Q13405	MRPL49		0	0.108323	-0.0528235	0.00876668	-0.0382821	0	-0.00269203	-0.0368321	-0.188734	0.0878498	0	0.1496	0.00353875	0.17012	0.171641	0	0.254889	0.0381102	0.19053	0.163506		0		0.12753	0.683087		-0.0120017	0.0425938		0.0451707	0.00058492		0.0961785	0.393851
P62906|RL10A_HUMAN 60S ribosomal protein L10a OS=Homo sapiens OX=9606 GN=RPL10A PE=1 SV=2	P62906	RPL10A		0	-0.0846721	-0.102493	-0.0918515	-0.123557	0	-0.361493	0.00716329	-0.18169	0.192751	0	-0.0196744	-0.0171038	-0.00741569	0.0613819	0	-0.164566	0.130435	-0.0784624	0.110478		0		-0.157601	0.683087		0.00450041	0.00995605		-0.0898549	0.00058492		0.0602634	0.169039
Q9H479|FN3K_HUMAN Fructosamine-3-kinase OS=Homo sapiens OX=9606 GN=FN3K PE=1 SV=1	Q9H479	FN3K		0	0.0411969	0.0866958	0.0902587	0.0889104	0	0.0778568	-0.0222779	-0.114863	0.0545179	0	0.107725	0.0407656	0.0277977	0.0203731	0	0.284266	-0.0831443	0.24266	0.195739		0		0.127761	0.683087		0.00550978	0.0153878		0.0614635	0.00058492		0.089885	0.431334
P00387|NB5R3_HUMAN NADH-cytochrome b5 reductase 3 OS=Homo sapiens OX=9606 GN=CYB5R3 PE=1 SV=3	P00387	CYB5R3		0	-0.0851165	-0.124877	-0.111706	-0.0257279	0	-0.00851763	-0.23984	-0.496257	0.202648	0	-0.152013	-0.0611838	0.0408277	0.0350685	0	-0.241617	-0.320493	-0.477694	-0.585048		0		-0.121816	0.683087		-0.186599	0.498969		-0.261207	0.040084		-0.0932647	0.0960891
H3BQ23|H3BQ23_HUMAN Anamorsin (Fragment) OS=Homo sapiens OX=9606 GN=CIAPIN1 PE=1 SV=1	H3BQ23	CIAPIN1		0	0.164795	0.248649	0.252681	0.0520135	0					0	0.13535	-0.0151861	-0.0304478	-0.167412							0		0.150072	0.683087		0.116731	0.165408		0.111116	0.00058492		-0.0576992	0.115877
Q96KR6|F210B_HUMAN Protein FAM210B;mitochondrial OS=Homo sapiens OX=9606 GN=FAM210B PE=1 SV=2	Q96KR6	FAM210B		0	0.100657	0.0462602	-0.0528693	0.00952633	0	0.0558146	0.223597	0.099457	0.277192	0	0.0608582	0.0775223	-0.0205756	0.301257	0	0.266218	0.133091	0.208553	0.527497		0		0.120887	0.683087		0.120118	0.409241		0.0586412	0.00058492		0.278868	0.618577
O15067|PUR4_HUMAN Phosphoribosylformylglycinamidine synthase OS=Homo sapiens OX=9606 GN=PFAS PE=1 SV=4	O15067	PFAS		0	0.00430075	0.268495	-0.139961	0.0653654	0	0.0837173	-0.0766482	-0.131828	0.0954435	0	0.210645	0.252979	0.201859	0.153049	0	0.401165	0.327597	0.259955	0.191518		0		0.174957	0.683087		0.193106	0.30793		0.0475063	0.00058492		0.126344	0.697854
Q9H7P6|MB12B_HUMAN Multivesicular body subunit 12B OS=Homo sapiens OX=9606 GN=MVB12B PE=1 SV=2	Q9H7P6	MVB12B		0	0.094257	-0.398065	-0.000175446	-0.177274	0	0.0203355	-0.266183	-0.449812	-0.059997	0	0.117779	-0.0891022	0.0412901	0.371643	0	0.157051	0.111453	-0.0630748	0.217269		0		0.0973557	0.683087		-0.160474	0.215561		-0.117943	0.00058492		0.08791	0.134568
P58340|MLF1_HUMAN Myeloid leukemia factor 1 OS=Homo sapiens OX=9606 GN=MLF1 PE=1 SV=1	P58340	MLF1		0	-0.106402	-0.0342537	0.0923933	1.07462	0					0	-0.230572	-0.159871	-0.157549	0.095425							0		-0.168487	0.683087		-0.0970624	0.211717		-0.0325777	0.00058492		0.585024	0.389225
Q16082|HSPB2_HUMAN Heat shock protein beta-2 OS=Homo sapiens OX=9606 GN=HSPB2 PE=1 SV=2	Q16082	HSPB2		0	0.891672	0.2698	1.40509	0.341552	0	0.108614	-0.252003	-0.286664	-0.0660624	0	-0.00167968	-0.11878	0.0778122	-0.055022	0	0.473888	0.366423	0.397628	0.379761		0		0.368123	0.683087		0.0663601	0.0590431		0.398467	0.00058492		0.150057	0.27431
P32456|GBP2_HUMAN Guanylate-binding protein 2 OS=Homo sapiens OX=9606 GN=GBP2 PE=1 SV=3	P32456	GBP2		0	0.790142	0.348228	0.449788	-0.29227	0	-0.121805	-0.121805	-0.26036	0.00883978	0	0.318104	-0.57747	0.184055	-0.755412	0	0.387087	0.102523	0.23182	0.0678204		0		0.343382	0.683087		-0.0621311	0.0423597		0.151326	0.00058492		-0.242756	0.298987
A0A2U3TZU2|A0A2U3TZU2_HUMAN Glucose-6-phosphate isomerase OS=Homo sapiens OX=9606 GN=GPI PE=1 SV=1	A0A2U3TZU2	GPI		0	-0.111223	-0.180058	-0.138368	-0.147194	0	-0.0779471	0.15361	-0.0187003	0.150785	0	-0.273159	-0.269058	-0.0678336	-0.179283	0	-0.0352029	0.174356	-0.173323	0.0734919		0		-0.124383	0.683087		-0.0302872	0.0337411		-0.0995562	0.00360751		-0.02555	0.0452081
B7Z4W5|B7Z4W5_HUMAN Cysteine conjugate-beta lyase cytoplasmic (Glutamine transaminase K;kyneurenine aminotransferase);isoform CRA_b OS=Homo sapiens OX=9606 GN=KYAT1 PE=1 SV=1	B7Z4W5	KYAT1		0	0.174062	0.245693	0.0609445	0.0599805	0	-0.0521399	0.040182	-0.0792552	0.194806	0	0.236132	0.347486	0.156431	0.187503	0	0.218086	-0.00725326	0.0313097	0.350166		0		0.144035	0.683087		0.156527	0.249067		0.0423576	0.00058492		0.198114	0.707884
Q8N0Z2|ABRA_HUMAN Actin-binding Rho-activating protein OS=Homo sapiens OX=9606 GN=ABRA PE=2 SV=1	Q8N0Z2	ABRA		0	0.0581393	0.154996	0.282364	0.933624	0	0.365807	0.169103	0.15679	0.30713	0	0.00821502	-0.0294299	0.0226457	0.486986	0	0.237783	0.095066	0.9544	1.0868		0		0.167486	0.683087		0.0974338	0.249067		0.35405	0.0135242		0.703634	0.878752
J3KNA0|J3KNA0_HUMAN Mitochondrial inner membrane protein OXA1L OS=Homo sapiens OX=9606 GN=OXA1L PE=1 SV=1	J3KNA0	OXA1L		0	0.0170496	-0.135783	0.0483482	-0.00695543	0	0.40107	0.0554421	-0.0553551	0.276464	0	0.156531	-0.183637	0.117897	0.0716427	0	0.0951018	-0.0755823	-0.0567044	0.125035		0		0.167438	0.683087		-0.0848902	0.215561		0.0135465	0.00058492		0.116547	0.414432
Q01105|SET_HUMAN Protein SET OS=Homo sapiens OX=9606 GN=SET PE=1 SV=3	Q01105	SET		0	-0.198228	-0.328744	-0.18802	-0.27158	0	-0.0625554	-0.303394	-0.450731	0.0216731	0	-0.208243	-0.309598	0.163811	0.0847644	0	-0.934063	-0.440456	-0.325184	-0.216896		0		-0.350772	0.683087		-0.345548	1.68856		-0.200031	0.00058492		-0.0955097	0.230246
Q5JSH3|WDR44_HUMAN WD repeat-containing protein 44 OS=Homo sapiens OX=9606 GN=WDR44 PE=1 SV=1	Q5JSH3	WDR44		0	0.012539	0.296477	-0.0332399	0.00885787	0	0.0290806	0.0881395	-0.09868	-0.0375088	0	0.328952	0.41447	0.277524	0.239348	0	0.43438	0.122253	0.3273	0.199947		0		0.201238	0.683087		0.230335	0.497327		0.118226	0.00058492		0.102661	0.31761
P16930|FAAA_HUMAN Fumarylacetoacetase OS=Homo sapiens OX=9606 GN=FAH PE=1 SV=2	P16930	FAH		0	0.131318	0.1137	0.0765445	0.0505425	0	-0.0380994	0.228736	-0.0491481	0.219549	0	0.28893	0.216709	0.116271	0.0192946	0	0.202787	-0.0454285	0.152561	0.179125		0		0.146234	0.683087		0.128429	0.249067		0.074057	0.00058492		0.117128	0.485088
P01023|A2MG_HUMAN Alpha-2-macroglobulin OS=Homo sapiens OX=9606 GN=A2M PE=1 SV=3	P01023	A2M		0	-0.00748505	0.797742	0.216983	0.997622	0	0.949865	0.440184	0.556219	-0.217434	0	0.705356	1.34035	0.0795932	-0.0331685	0	0.0496854	-0.385341	0.271203	-1.02881		0		0.424355	0.683087		0.548234	0.235727		0.280999	0.154402		-0.0704466	0.0220786
A0A087X165|A0A087X165_HUMAN SRC kinase-signaling inhibitor 1 OS=Homo sapiens OX=9606 GN=SRCIN1 PE=1 SV=1	A0A087X165	SRCIN1		0	0.0900349	0.00844932	-0.258868	-0.0702237	0					0	0.335473	0.39259	-0.302117	0.0772817							0		0.212754	0.683087		0.20052	0.211717		-0.280492	0.159453		0.00352898	0.0052206
Q9UJU6|DBNL_HUMAN Drebrin-like protein OS=Homo sapiens OX=9606 GN=DBNL PE=1 SV=1	Q9UJU6	DBNL		0	0.0147968	0.159985	-0.0282064	0.124225	0	0.104586	-0.0747981	-0.159669	0.0369575	0	0.112291	0.289034	0.0957481	0.0847937	0	0.320508	0.0722992	0.256049	0.190009		0		0.138045	0.683087		0.11163	0.211717		0.0409805	0.00058492		0.108996	0.59179
P04114|APOB_HUMAN Apolipoprotein B-100 OS=Homo sapiens OX=9606 GN=APOB PE=1 SV=2	P04114	APOB		0	0.0865788	0.54453	0.00718672	0.612671	0	0.962956	0.298119	0.477974	-0.145617	0	0.949196	1.0399	0.587694	0.5413	0	-0.0627969	-0.439592	0.272886	-0.655043		0		0.483983	0.683087		0.360739	0.181689		0.336435	0.154402		0.0883277	0.0455597
Q9Y383|LC7L2_HUMAN Putative RNA-binding protein Luc7-like 2 OS=Homo sapiens OX=9606 GN=LUC7L2 PE=1 SV=2	Q9Y383	LUC7L2		0	0.26739	0.0979624	0.0206462	0.0891205	0	0.973238	-0.859245	-0.495183	-0.0366059	0	-0.0448015	-0.097289	0.0145482	-0.0203177	0	0.333839	-0.0794219	0.18273	-0.12945		0		0.382416	0.683087		-0.234498	0.16895		-0.0693147	0.00058492		-0.0243134	0.0712908
P30740|ILEU_HUMAN Leukocyte elastase inhibitor OS=Homo sapiens OX=9606 GN=SERPINB1 PE=1 SV=1	P30740	SERPINB1		0	0.146627	0.0833894	0.0471001	0.0760902	0	-0.477758	-0.0163737	-0.240201	0.121738	0	-0.291805	-0.208297	-0.114164	0.019215	0	-0.417872	-0.183031	-0.587568	0.0955243		0		-0.260202	0.683087		-0.0810781	0.165162		-0.223708	0.00473085		0.0781418	0.483963
Q8N983|RM43_HUMAN 39S ribosomal protein L43;mitochondrial OS=Homo sapiens OX=9606 GN=MRPL43 PE=1 SV=1	Q8N983	MRPL43		0	0.124988	-0.123013	0.0160357	-0.0239547	0	-0.00697039	0.0156868	-0.218774	0.130478	0	0.125736	-0.116113	0.106179	0.160441	0	0.207964	0.0180949	0.154342	0.25605		0		0.112929	0.683087		-0.051336	0.154128		0.0144458	0.00058492		0.130754	0.483628
Q6NVY1|HIBCH_HUMAN 3-hydroxyisobutyryl-CoA hydrolase;mitochondrial OS=Homo sapiens OX=9606 GN=HIBCH PE=1 SV=2	Q6NVY1	HIBCH		0	0.270248	-0.0491574	0.130817	0.129916	0	0.103136	0.237377	-0.269572	-0.0535012	0	0.075097	-0.141497	0.0159409	0.0482286	0	0.0386289	0.620599	-0.473864	0.28621		0		0.121777	0.683087		0.16683	0.148548		-0.14917	0.00058492		0.102713	0.304313
P98179|RBM3_HUMAN RNA-binding protein 3 OS=Homo sapiens OX=9606 GN=RBM3 PE=1 SV=1	P98179	RBM3		0	0.175809	-0.0490004	0.0120447	-0.00184582	0	0.266189	0.163468	0.602368	0.838791	0	-0.0571736	-0.171751	0.133677	0.14701	0	0.575591	1.1398	-0.188673	0.673813		0		0.240104	0.683087		0.270628	0.138208		0.139854	0.00058492		0.414442	0.496341
Q9H9Q2|CSN7B_HUMAN COP9 signalosome complex subunit 7b OS=Homo sapiens OX=9606 GN=COPS7B PE=1 SV=1	Q9H9Q2	COPS7B		0	0.313934	0.026903	0.0853821	-0.134516	0					0	0.0897868	-0.193561	0.123243	0.192665							0		0.20186	0.683087		-0.0833288	0.136282		0.104313	0.00058492		0.0290743	0.0330271
Q9Y5J7|TIM9_HUMAN Mitochondrial import inner membrane translocase subunit Tim9 OS=Homo sapiens OX=9606 GN=TIMM9 PE=1 SV=1	Q9Y5J7	TIMM9		0	0.067971	0.0608338	0.238089	0.0704709	0	0.0384542	0.0657263	-0.0293205	-0.0102469	0	0.102106	-0.0889064	0.124886	0.0682277	0	0.189175	0.116951	0.0755533	0.111754		0		0.0994264	0.683087		0.0386511	0.0957037		0.102302	0.00058492		0.0600514	0.339051
Q6P1A2|MBOA5_HUMAN Lysophospholipid acyltransferase 5 OS=Homo sapiens OX=9606 GN=LPCAT3 PE=1 SV=1	Q6P1A2	LPCAT3		0	-0.00431469	0.0760497	-0.145709	-0.0837133	0	0.100869	-0.0904813	-0.181237	-0.0287888	0	0.168121	0.104975	0.19283	0.125667	0	0.370016	0.0360434	0.265812	0.0922451		0		0.158673	0.683087		0.0316466	0.0811962		0.0329238	0.00058492		0.0263527	0.0729498
P29401|TKT_HUMAN Transketolase OS=Homo sapiens OX=9606 GN=TKT PE=1 SV=3	P29401	TKT		0	-0.119466	0.227323	-0.107831	0.265735	0	1.32402	0.137857	0.0775646	-0.0264691	0	0.2171	0.432289	0.156381	0.031637	0	0.830112	-0.393665	1.31151	-0.0648455		0		0.562941	0.683087		0.100951	0.0760785		0.359406	0.00058492		0.0515143	0.121492
Q9H6R3|ACSS3_HUMAN Acyl-CoA synthetase short-chain family member 3;mitochondrial OS=Homo sapiens OX=9606 GN=ACSS3 PE=1 SV=1	Q9H6R3	ACSS3		0	0.240688	0.0738867	0.110077	0.122552	0	0.146852	0.170413	0.0335365	0.277001	0	0.15219	0.0283302	0.114446	0.159966	0	-0.0292511	-0.132298	-0.0136162	0.108092		0		0.12762	0.683087		0.0350828	0.0664		0.0611107	0.00058492		0.166903	0.783984
P26678|PPLA_HUMAN Cardiac phospholamban OS=Homo sapiens OX=9606 GN=PLN PE=1 SV=1	P26678	PLN		0	1.23738	0.271421	1.26829	0.971258	0	1.06171	0.218835	0.841887	1.50408	0	-0.546351	-0.399528	-0.678622	-0.537006	0	1.39733	0.2212	1.26721	0.883425		0		0.787515	0.683087		0.077982	0.0651151		0.674691	0.00058492		0.705438	0.387941
P48059|LIMS1_HUMAN LIM and senescent cell antigen-like-containing domain protein 1 OS=Homo sapiens OX=9606 GN=LIMS1 PE=1 SV=4	P48059	LIMS1							0	0.150061	-0.0498802	-0.193413	0.0876879						0	0.286345	0.147594	0.308208	0.178266		0		0.218203	0.683087		0.0488571	0.0598951		0.0573974	0.00058492		0.132977	0.362197
A0A2R8YFG2|A0A2R8YFG2_HUMAN Nicotinamide-nucleotide adenylyltransferase OS=Homo sapiens OX=9606 GN=NMNAT3 PE=1 SV=1	A0A2R8YFG2	NMNAT3		0	0.00940068	0.0230837	-0.0837658	-0.130849	0	0.0497958	-0.118162	-0.28187	-0.0501813	0	0.21191	0.0585007	0.055673	0.23539	0	0.273287	0.144031	0.26281	0.304855		0		0.136098	0.683087		0.0268633	0.0571589		-0.0117882	0.00058492		0.0898038	0.169283
P62899|RL31_HUMAN 60S ribosomal protein L31 OS=Homo sapiens OX=9606 GN=RPL31 PE=1 SV=1	P62899	RPL31		0	-0.190625	-0.0439065	-0.0984094	0.0979103	0	-0.519763	-0.150336	-0.237124	0.113276	0	-0.204468	-0.183307	-0.174567	0.0616461	0	0.048116	0.250897	-0.243507	0.0948737		0		-0.216685	0.683087		-0.031663	0.0405398		-0.188402	0.20572		0.0919266	0.646007
P49189|AL9A1_HUMAN 4-trimethylaminobutyraldehyde dehydrogenase OS=Homo sapiens OX=9606 GN=ALDH9A1 PE=1 SV=3	P49189	ALDH9A1		0	0.0172761	-0.112426	-0.0344476	-0.0873443	0	-1.11499	0.102334	0.539974	0.554523	0	-0.131719	-0.212952	-0.391594	-0.251348	0	-0.580775	0.120764	-0.130841	0.0119477		0		-0.452551	0.683087		-0.0255698	0.0394392		-0.00422703	0.000152682		0.0569444	0.0501937
P51151|RAB9A_HUMAN Ras-related protein Rab-9A OS=Homo sapiens OX=9606 GN=RAB9A PE=1 SV=1	P51151	RAB9A		0	-0.0479766	-0.117252	0.00628241	-0.195256	0	0.524228	-0.0463833	-0.130451	0.0169604	0	0.122827	-0.0260795	0.165559	0.171251	0	0.315748	0.13722	0.598573	0.0267461		0		0.228707	0.683087		-0.0131237	0.0284107		0.159991	0.00058492		0.00492558	0.00784357
O95202|LETM1_HUMAN Mitochondrial proton/calcium exchanger protein OS=Homo sapiens OX=9606 GN=LETM1 PE=1 SV=1	O95202	LETM1		0	0.135284	0.0776531	0.0895376	-0.0221977	0	-0.0402976	-0.0504114	-0.118105	0.217105	0	0.2252	0.0200769	0.0909223	0.0816786	0	0.231032	-0.0292288	0.12543	0.179751		0		0.137805	0.683087		0.00452245	0.0143474		0.0469462	0.00058492		0.114084	0.434735
D6W5Y5|D6W5Y5_HUMAN Cold inducible RNA binding protein;isoform CRA_c OS=Homo sapiens OX=9606 GN=CIRBP PE=1 SV=1	D6W5Y5	CIRBP		0	-0.0406698	0.0213964	-0.190457	-0.148064	0	-0.152626	0.0302113	-0.0721184	0.237675	0	-0.0893174	-0.180417	-0.0138463	0.0115472	0	-0.0775322	0.356883	-0.422691	0.076594		0		-0.0900365	0.683087		0.0570185	0.0664		-0.174778	0.0132147		0.0444381	0.0900189
P82673|RT35_HUMAN 28S ribosomal protein S35;mitochondrial OS=Homo sapiens OX=9606 GN=MRPS35 PE=1 SV=1	P82673	MRPS35		0	0.107053	0.0174167	0.0498578	-0.0454195	0	-0.0146261	0.0325724	-0.178868	0.159264	0	0.169037	-0.0361344	-0.0439614	-0.0059117	0	0.191495	-0.00321175	0.187825	0.125062		0		0.11324	0.683087		0.00266075	0.00964376		0.00371342	0.00058492		0.0582487	0.215275
C9J798|RAS4B_HUMAN Ras GTPase-activating protein 4B OS=Homo sapiens OX=9606 GN=RASA4B PE=3 SV=2	C9J798	RASA4B		0	0.0411636	0.0996037	-0.109528	0.0903752	0	0.363918	0.0185491	-0.261429	0.195701	0	0.00513612	0.127023	0.0142662	0.0837654	0	0.271269	0.131024	0.302479	0.0992672		0		0.170372	0.683087		0.09405	0.392832		-0.0135528	0.00058492		0.117277	0.673108
P61086|UBE2K_HUMAN Ubiquitin-conjugating enzyme E2 K OS=Homo sapiens OX=9606 GN=UBE2K PE=1 SV=3	P61086	UBE2K		0	0.0397894	0.0163821	-0.025519	0.0446641	0	0.0251687	0.100227	-0.100315	-0.0764278	0	0.180983	0.106694	0.0693478	0.104468	0	0.229039	0.0154936	0.169722	0.118184		0		0.118745	0.683087		0.0596993	0.231848		0.0283089	0.00058492		0.0477222	0.185086
P02675|FIBB_HUMAN Fibrinogen beta chain OS=Homo sapiens OX=9606 GN=FGB PE=1 SV=2	P02675	FGB		0	-0.0120622	0.00679289	-0.0826098	0.481873	0	1.8187	0.165042	0.415893	-0.220518	0	0.415693	2.04191	0.129831	0.344392	0	0.515717	-2.11005	-1.71995	-2.19654		0		0.684511	0.683087		0.0259217	0.00290625		-0.31421	0.00058492		-0.397698	0.124616
O00233|PSMD9_HUMAN 26S proteasome non-ATPase regulatory subunit 9 OS=Homo sapiens OX=9606 GN=PSMD9 PE=1 SV=3	O00233	PSMD9		0	-0.0302148	0.187998	-0.114489	-0.00779922	0	0.11839	-0.0257903	-0.0613446	0.0277219	0	0.228117	0.200475	0.149472	0.0656254	0	0.455644	0.0545875	0.199561	0.0334467		0		0.192984	0.683087		0.104317	0.24524		0.0432999	0.00058492		0.0297487	0.170803
Q99536|VAT1_HUMAN Synaptic vesicle membrane protein VAT-1 homolog OS=Homo sapiens OX=9606 GN=VAT1 PE=1 SV=2	Q99536	VAT1		0	-0.014405	0.29127	-0.249127	-0.0108429	0	0.178506	-0.0466453	-0.0494831	-0.0776533	0	0.166549	0.153177	0.207601	-0.0138996	0	0.565285	0.0343353	0.4985	-0.0824251		0		0.223984	0.683087		0.108034	0.211717		0.101873	0.00058492		-0.0462052	0.275413
O43765|SGTA_HUMAN Small glutamine-rich tetratricopeptide repeat-containing protein alpha OS=Homo sapiens OX=9606 GN=SGTA PE=1 SV=1	O43765	SGTA		0	0.0344098	-0.035515	0.0651633	0.0841273	0	0.140837	0.0782652	0.133713	0.296873	0	0.0632156	-0.140586	0.0773835	0.119766	0	0.126153	-0.125863	0.0944681	0.303769		0		0.0911536	0.683087		-0.0559249	0.141986		0.0926821	0.00473085		0.201134	0.708542
Q13451|FKBP5_HUMAN Peptidyl-prolyl cis-trans isomerase FKBP5 OS=Homo sapiens OX=9606 GN=FKBP5 PE=1 SV=2	Q13451	FKBP5		0	0.0787382	-0.0756228	0.0690241	0.0265455	0	-0.00191982	0.00360736	0.0472507	0.401206	0	0.164336	-0.0528641	0.124518	0.241559	0	0.253602	0.136299	0.177086	0.474523		0		0.123689	0.683087		0.00285494	0.00572646		0.10447	0.0135242		0.285958	0.673108
Q10713|MPPA_HUMAN Mitochondrial-processing peptidase subunit alpha OS=Homo sapiens OX=9606 GN=PMPCA PE=1 SV=2	Q10713	PMPCA		0	-0.0269429	-0.108011	-0.157731	-0.161858	0	0.140471	-0.0216196	-0.0535037	0.011075	0	0.142174	-0.000905609	0.204416	0.15589	0	0.243146	-0.0551399	0.152461	0.125025		0		0.124712	0.683087		-0.0464189	0.181689		0.0364107	0.00058492		0.0325331	0.0685282
Q8N163|CCAR2_HUMAN Cell cycle and apoptosis regulator protein 2 OS=Homo sapiens OX=9606 GN=CCAR2 PE=1 SV=2	Q8N163	CCAR2		0	0.112693	-0.0205379	0.240946	0.0997219	0	0.0720311	-0.204534	-0.249228	0.0165684	0	0.17206	0.19492	0.247933	0.410241	0	0.707394	0.0439015	0.501761	0.0514961		0		0.266045	0.683087		0.00343731	0.0042516		0.185353	0.00058492		0.144507	0.359301
P35573|GDE_HUMAN Glycogen debranching enzyme OS=Homo sapiens OX=9606 GN=AGL PE=1 SV=3	P35573	AGL		0	-0.0338705	-0.00841225	0.0110899	0.0631239	0	-0.112703	0.053468	0.0634641	0.00835637	0	-0.0599718	-0.0975644	0.0602452	0.0179967	0	-0.186557	0.0342202	-0.274726	0.144246		0		-0.0982757	0.683087		-0.00457212	0.0136489		-0.0349816	0.00058492		0.0584308	0.301407
O94905|ERLN2_HUMAN Erlin-2 OS=Homo sapiens OX=9606 GN=ERLIN2 PE=1 SV=1	O94905	ERLIN2		0	-0.0275747	-0.141818	-0.163208	-0.226619	0	-0.152796	-0.0523535	-0.21408	-0.144481	0	-0.155699	-0.0957108	-0.0337385	-0.14122	0	-0.638476	-0.0123042	-0.192194	-0.0131328		0		-0.243636	0.683087		-0.0755465	0.249067		-0.150805	0.112029		-0.131363	0.596204
A0A0C4DFN3|A0A0C4DFN3_HUMAN Monoglyceride lipase OS=Homo sapiens OX=9606 GN=MGLL PE=1 SV=1	A0A0C4DFN3	MGLL		0	-0.149205	0.0874466	-0.100578	0.0433222	0	0.333757	0.204385	0.101141	0.133628	0	0.31881	0.290679	0.194383	0.274731	0	0.564117	0.335022	0.470947	0.181551		0		0.26687	0.683087		0.229383	0.765742		0.166473	0.00058492		0.158308	0.671724
Q9UMX0|UBQL1_HUMAN Ubiquilin-1 OS=Homo sapiens OX=9606 GN=UBQLN1 PE=1 SV=2	Q9UMX0	UBQLN1		0	-0.00566367	0.407292	-0.0790036	0.0374197	0	0.0668916	0.166942	-0.0325566	0.294273	0	0.280258	0.472292	0.197832	0.19299	0	0.199271	-0.104448	0.11239	0.0876591		0		0.135189	0.683087		0.235519	0.249067		0.0496655	0.00058492		0.153085	0.581926
Q96CN7|ISOC1_HUMAN Isochorismatase domain-containing protein 1 OS=Homo sapiens OX=9606 GN=ISOC1 PE=1 SV=3	Q96CN7	ISOC1		0	0.13116	0.0869009	0.130886	0.104041	0	0.0119983	0.102819	-0.0770033	0.145078	0	0.0748367	0.188351	0.0036599	0.120163	0	0.206215	-0.0823001	0.111169	0.0740563		0		0.106052	0.683087		0.0739428	0.178581		0.042178	0.00058492		0.110835	0.709505
P05141|ADT2_HUMAN ADP/ATP translocase 2 OS=Homo sapiens OX=9606 GN=SLC25A5 PE=1 SV=7	P05141	SLC25A5		0	0.191337	0.0457342	0.223107	0.134136	0	0.0422011	-0.0412191	-0.167811	0.125469	0	0.032491	0.020975	0.108424	0.087396	0	0.150573	-0.128629	0.0556537	0.179734		0		0.104151	0.683087		-0.0257847	0.06867		0.0548434	0.00058492		0.131684	0.817797
Q6P4A7|SFXN4_HUMAN Sideroflexin-4 OS=Homo sapiens OX=9606 GN=SFXN4 PE=1 SV=1	Q6P4A7	SFXN4		0	0.0798486	-0.137581	0.0345065	0.00852879	0	0.0509718	-0.0177218	-0.0614003	0.178716	0	0.0679205	-0.117265	0.0492514	0.164967	0	0.148158	-0.0114634	0.230554	0.283654		0		0.0867248	0.683087		-0.0710079	0.242179		0.0632278	0.00058492		0.158966	0.598589
O60506|HNRPQ_HUMAN Heterogeneous nuclear ribonucleoprotein Q OS=Homo sapiens OX=9606 GN=SYNCRIP PE=1 SV=2	O60506	SYNCRIP		0	0.0243361	0.0206189	-0.00659504	0.0482538	0	0.301811	-0.0752829	-0.215892	0.0880164	0	0.0207488	-0.189589	0.0754238	0.0750546	0	0.490032	0.125578	0.444067	0.0448117		0		0.209232	0.683087		-0.0296689	0.0556469		0.0742509	0.00058492		0.0640341	0.442827
P35609|ACTN2_HUMAN Alpha-actinin-2 OS=Homo sapiens OX=9606 GN=ACTN2 PE=1 SV=1	P35609	ACTN2		0	-0.084444	0.136692	-0.0170088	0.0218608	0	0.330082	-0.239199	-0.19722	-0.0796208	0	0.230747	0.216954	0.222515	0.185638	0	0.203238	-0.0169496	0.280813	-0.0931811		0		0.169906	0.683087		0.0243742	0.0302321		0.072275	0.00058492		0.00867433	0.0172753
Q96AX9|MIB2_HUMAN E3 ubiquitin-protein ligase MIB2 OS=Homo sapiens OX=9606 GN=MIB2 PE=1 SV=3	Q96AX9	MIB2		0	0.0789935	-0.109195	-0.276158	-0.218839	0	0.0409674	0.097448	-0.218773	0.212622	0	0.0744752	-0.0415017	-0.116265	-0.004457	0	0.198314	0.0569808	0.219918	0.15046		0		0.0981874	0.683087		0.000933033	0.00174999		-0.0978193	0.00058492		0.0349464	0.0563633
P61457|PHS_HUMAN Pterin-4-alpha-carbinolamine dehydratase OS=Homo sapiens OX=9606 GN=PCBD1 PE=1 SV=2	P61457	PCBD1		0	0.0224415	-0.25392	-0.0684131	-0.113427	0	0.215062	-0.100964	-0.179568	0.0803567	0	0.0291217	-0.155917	-0.162513	-0.0451992	0	0.231168	0.0375546	0.106151	0.0431429		0		0.124448	0.683087		-0.118312	0.24841		-0.076086	0.00058492		-0.00878177	0.0211968
Q9H2W6|RM46_HUMAN 39S ribosomal protein L46;mitochondrial OS=Homo sapiens OX=9606 GN=MRPL46 PE=1 SV=1	Q9H2W6	MRPL46		0	0.128735	0.0705161	-0.080618	-0.121671	0	-0.0290925	-0.0834874	-0.267635	0.0168286	0	0.193492	0.0815814	0.138534	0.0941207	0	0.166714	-0.118909	0.0435113	0.0609443		0		0.114962	0.683087		-0.0125748	0.0284097		-0.0415519	0.00058492		0.0125558	0.0302098
Q99598|TSNAX_HUMAN Translin-associated protein X OS=Homo sapiens OX=9606 GN=TSNAX PE=1 SV=1	Q99598	TSNAX		0	-0.0930133	-0.0623115	-0.113482	-0.171938	0	0.652659	0.0677773	0.334401	0.100399	0	0.108209	-0.0429923	-0.0349053	0.101481	0	0.742572	0.0735066	0.500423	0.18774		0		0.352607	0.683087		0.00899501	0.0253275		0.171609	0.00058492		0.0544203	0.124375
P0DJ93|SIM13_HUMAN Small integral membrane protein 13 OS=Homo sapiens OX=9606 GN=SMIM13 PE=3 SV=1	P0DJ93	SMIM13		0	0.0626482	-0.158559	-0.0240589	-0.0902099	0	0.0804549	-0.00562396	-0.144306	0.167511	0	0.0846528	-0.168287	0.0832337	0.188073	0	0.395615	0.144921	0.410057	0.247267		0		0.155843	0.683087		-0.0468873	0.0793822		0.0812317	0.00058492		0.12816	0.380254
A5D6W6|FITM1_HUMAN Fat storage-inducing transmembrane protein 1 OS=Homo sapiens OX=9606 GN=FITM1 PE=2 SV=1	A5D6W6	FITM1		0	0.0513883	0.085262	0.0110532	0.105496	0	0.113185	-0.164841	-0.155634	0.0648312	0	0.0414234	0.0669076	0.0276046	0.109594	0	0.280964	0.161587	0.306154	0.201838		0		0.12174	0.683087		0.037229	0.0652613		0.0472944	0.00058492		0.12044	0.673108
Q5T4U5|Q5T4U5_HUMAN Acyl-Coenzyme A dehydrogenase;C-4 to C-12 straight chain;isoform CRA_a OS=Homo sapiens OX=9606 GN=ACADM PE=1 SV=1	Q5T4U5	ACADM		0	0.384449	-0.0160183	0.688157	0.567471	0	0.0824111	0.0964999	-0.127676	0.110167	0	-0.0330967	-0.321409	-0.0347295	-0.0367186	0	0.264097	0.0102953	-0.075733	0.125721		0		0.174465	0.683087		-0.0576581	0.0829095		0.112505	0.00058492		0.19166	0.337895
P46199|IF2M_HUMAN Translation initiation factor IF-2;mitochondrial OS=Homo sapiens OX=9606 GN=MTIF2 PE=1 SV=2	P46199	MTIF2		0	0.0885117	0.047375	-0.0733359	-0.0640422	0	0.00175304	-0.0724846	-0.288199	0.0814637	0	0.159639	0.0894691	0.15048	0.236	0	0.144451	-0.0781691	0.0710557	0.012139		0		0.0985887	0.683087		-0.00345242	0.00788115		-0.0349999	0.00058492		0.0663901	0.202712
Q6PHR2|ULK3_HUMAN Serine/threonine-protein kinase ULK3 OS=Homo sapiens OX=9606 GN=ULK3 PE=1 SV=2	Q6PHR2	ULK3		0	-0.00330232	0.0606993	-0.0966879	-0.243569	0	0.0519454	0.0210003	-0.342898	-0.0557311	0	0.268633	0.237695	0.159374	0.0773761	0	0.221648	0.283796	0.0525191	0.109109		0		0.134731	0.683087		0.150798	0.338463		-0.0569232	0.00058492		-0.0282037	0.0513422
Q9Y4L1|HYOU1_HUMAN Hypoxia up-regulated protein 1 OS=Homo sapiens OX=9606 GN=HYOU1 PE=1 SV=1	Q9Y4L1	HYOU1		0	-0.0330912	0.0760676	-0.0930186	0.0792739	0	0.117739	0.102294	-0.0268694	0.315991	0	0.174909	0.202838	0.0226915	0.141915	0	0.34511	0.110123	0.198173	0.284294		0		0.151167	0.683087		0.12283	0.506713		0.0252441	0.00058492		0.205369	0.73602
Q9NT62|ATG3_HUMAN Ubiquitin-like-conjugating enzyme ATG3 OS=Homo sapiens OX=9606 GN=ATG3 PE=1 SV=1	Q9NT62	ATG3		0	0.0122359	0.168029	-0.0259199	-0.00841426	0	0.0746568	0.0855029	-0.0463161	0.15983	0	0.142999	0.195004	0.104263	0.0910561	0	0.352444	0.0338037	0.264735	0.176001		0		0.145584	0.683087		0.120585	0.425051		0.0741904	0.00058492		0.104618	0.483628
Q9BSH5|HDHD3_HUMAN Haloacid dehalogenase-like hydrolase domain-containing protein 3 OS=Homo sapiens OX=9606 GN=HDHD3 PE=1 SV=1	Q9BSH5	HDHD3		0	-0.00114014	-0.0750543	-0.23422	-0.253521	0	0.435508	-0.277309	-0.0998162	0.0187952	0	0.0142956	-0.181973	0.0189894	0.0153258	0	0.529199	-0.0237454	0.0520659	0.175539		0		0.244465	0.683087		-0.13952	0.365993		-0.0657451	0.00058492		-0.0109652	0.0161865
P60953|CDC42_HUMAN Cell division control protein 42 homolog OS=Homo sapiens OX=9606 GN=CDC42 PE=1 SV=2	P60953	CDC42		0	-0.133445	-0.0492541	-0.171067	-0.161455	0	-0.0705252	-0.15969	-0.265629	-0.194671	0	-0.292261	-0.0500601	0.0328835	0.0499741	0	-1.06758	-0.412001	-0.285246	-0.274798		0		-0.390953	0.683087		-0.167752	0.251842		-0.172265	0.0586894		-0.145238	0.461303
A0A0A0MTN0|A0A0A0MTN0_HUMAN Cullin-2 OS=Homo sapiens OX=9606 GN=CUL2 PE=1 SV=1	A0A0A0MTN0	CUL2		0	-0.00703429	0.123209	-0.143286	-0.0699352	0	0.0638519	0.190811	-0.0998016	0.143774	0	0.21271	0.219897	0.200418	0.0974062	0	0.361763	-0.0662988	0.232601	0.0890733		0		0.157823	0.683087		0.116905	0.245136		0.047483	0.00058492		0.0650795	0.262255
P28906|CD34_HUMAN Hematopoietic progenitor cell antigen CD34 OS=Homo sapiens OX=9606 GN=CD34 PE=1 SV=2	P28906	CD34		0	0.00305124	-0.278051	-0.115867	0.0598346	0	-0.170478	-0.24705	-0.326104	0.0462775	0	-0.101364	-0.366831	-0.0182607	0.158739	0	-0.452973	0.221319	0.150482	0.474839		0		-0.180441	0.683087		-0.167653	0.196187		-0.0774373	0.00058492		0.184923	0.426591
Q5T440|CAF17_HUMAN Putative transferase CAF17;mitochondrial OS=Homo sapiens OX=9606 GN=IBA57 PE=1 SV=1	Q5T440	IBA57		0	0.0783129	-0.02448	0.0641391	-0.0465637	0	0.0511227	-0.142589	-0.22701	0.0498466	0	0.0927087	-0.0455635	-0.0196453	0.0186956	0	0.39009	0.0408871	0.37401	0.360017		0		0.153059	0.683087		-0.0429364	0.133223		0.0478733	0.00058492		0.0954988	0.221152
H0YBS0|H0YBS0_HUMAN Ankyrin-1 (Fragment) OS=Homo sapiens OX=9606 GN=ANK1 PE=1 SV=1	H0YBS0	ANK1		0	-0.0340027	-0.181274	-0.0994031	0.0661556	0	0.257224	0.113003	0.364059	-0.71175	0	0.0798897	0.0367341	-0.409281	-0.162902	0	0.354733	0.577789	0.0668281	0.498444		0		0.164461	0.683087		0.136563	0.12657		-0.0194493	0.00058492		-0.0775131	0.0475783
P35555|FBN1_HUMAN Fibrillin-1 OS=Homo sapiens OX=9606 GN=FBN1 PE=1 SV=3	P35555	FBN1		0	-0.0596913	-0.0915438	-0.00655128	0.213638	0	-0.281388	-0.641091	-0.819676	-0.351991	0	-0.218026	0.0542776	0.0286708	0.0705491	0	0.00960939	0.229408	0.320961	0.569925		0		-0.137374	0.683087		-0.112237	0.0810667		-0.119149	0.00058492		0.12553	0.126477
P38919|IF4A3_HUMAN Eukaryotic initiation factor 4A-III OS=Homo sapiens OX=9606 GN=EIF4A3 PE=1 SV=4	P38919	EIF4A3		0	0.169734	0.190846	0.22175	0.242795	0	0.0668754	-0.278162	-0.404146	-0.141424	0	0.0206821	-0.117758	-0.0313255	0.0666923	0	0.433821	-0.0110472	0.666888	-0.0206332		0		0.172778	0.683087		-0.0540303	0.069615		0.113291	0.00058492		0.0368576	0.069316
P10916|MLRV_HUMAN Myosin regulatory light chain 2;ventricular/cardiac muscle isoform OS=Homo sapiens OX=9606 GN=MYL2 PE=1 SV=3	P10916	MYL2		0	0.737788	0.354598	0.444514	0.107332	0	0.0143369	-0.915681	-0.824788	-0.627039	0	0.219697	-0.0437832	-0.127099	-0.0852307	0	0.136084	0.106532	0.243417	-0.283729		0		0.276977	0.683087		-0.124584	0.0598951		-0.065989	0.00058492		-0.222167	0.328318
Q9UP65|PA24C_HUMAN Cytosolic phospholipase A2 gamma OS=Homo sapiens OX=9606 GN=PLA2G4C PE=1 SV=2	Q9UP65	PLA2G4C		0	-0.0264634	0.0261685	-0.0197728	-0.0651749	0	0.0807877	-0.0392255	-0.120548	0.120934	0	0.236516	-0.0517401	0.0365716	0.105211	0	0.239861	0.10796	0.224906	0.248357		0		0.132675	0.683087		0.0107906	0.0287477		0.0302894	0.00058492		0.102332	0.334608
Q9UDX5|MTFP1_HUMAN Mitochondrial fission process protein 1 OS=Homo sapiens OX=9606 GN=MTFP1 PE=1 SV=1	Q9UDX5	MTFP1		0	0.384997	0.160237	0.370502	0.290387	0	-0.0139411	0.0557107	-0.0208355	0.185394	0	0.232171	-0.00696771	0.0844711	0.168316	0	0.0677538	-0.263292	0.133774	0.222143		0		0.167745	0.683087		-0.0135779	0.0207061		0.141978	0.00058492		0.21656	1.00298
P53621|COPA_HUMAN Coatomer subunit alpha OS=Homo sapiens OX=9606 GN=COPA PE=1 SV=2	P53621	COPA		0	0.384269	0.0856631	0.0289392	0.040702	0	-0.145406	-0.15399	-0.326433	0.0604503	0	0.330544	0.0675012	0.535347	0.349032	0	0.303373	0.033724	0.188009	0.116574		0		0.218195	0.683087		0.00822455	0.0176436		0.106465	0.00058492		0.14169	0.435087
P17858|PFKAL_HUMAN ATP-dependent 6-phosphofructokinase;liver type OS=Homo sapiens OX=9606 GN=PFKL PE=1 SV=6	P17858	PFKL		0	-0.15909	0.156709	-0.197364	-0.0601758	0	0.552001	0.124128	0.187748	0.360657	0	0.239401	0.279651	0.198863	0.134681	0	0.466651	0.0910168	0.271252	0.237059		0		0.274741	0.683087		0.162876	0.568656		0.115125	0.00058492		0.168055	0.428069
O95487|SC24B_HUMAN Protein transport protein Sec24B OS=Homo sapiens OX=9606 GN=SEC24B PE=1 SV=2	O95487	SEC24B		0	-0.0206917	0.0334584	0.000912954	-0.0497905	0	0.0408351	0.0811899	-0.0932147	0.0372493	0	0.357774	0.230188	0.281851	0.375805	0	0.388465	0.144806	0.293014	0.17208		0		0.191596	0.683087		0.122411	0.394969		0.120641	0.00058492		0.133836	0.32015
P05543|THBG_HUMAN Thyroxine-binding globulin OS=Homo sapiens OX=9606 GN=SERPINA7 PE=1 SV=2	P05543	SERPINA7		0	0.0788395	0.661157	0.0390629	0.281899	0	-0.0609283	-0.628944	-0.699167	-0.227652	0	0.757609	1.04414	0.385101	0.39809	0	1.17654	0.619861	1.0642	0.0566418		0		0.488014	0.683087		0.424053	0.181689		0.1973	0.00058492		0.127245	0.197263
Q7L592|NDUF7_HUMAN Protein arginine methyltransferase NDUFAF7;mitochondrial OS=Homo sapiens OX=9606 GN=NDUFAF7 PE=1 SV=1	Q7L592	NDUFAF7		0	0.0889791	0.0162029	-0.114561	0.0132248	0	-0.0280225	-0.0102317	-0.202699	0.0393334	0	0.223686	0.0561148	0.113414	0.0645846	0	0.219666	0.143553	0.168891	0.306642		0		0.126077	0.683087		0.0514099	0.171535		-0.00873848	0.00058492		0.105946	0.331927
Q9BRX8|F213A_HUMAN Redox-regulatory protein FAM213A OS=Homo sapiens OX=9606 GN=FAM213A PE=1 SV=3	Q9BRX8	FAM213A		0	0.247314	0.0986748	0.246406	0.0840422	0	0.176968	0.131664	-0.10798	0.203841	0	0.02711	0.0515641	0.115957	0.196837	0	0.0281172	-0.0818643	0.0300281	0.27088		0		0.119877	0.683087		0.0500096	0.136282		0.0711028	0.00058492		0.1889	0.857338
G8JLB6|G8JLB6_HUMAN Heterogeneous nuclear ribonucleoprotein H OS=Homo sapiens OX=9606 GN=HNRNPH1 PE=1 SV=1	G8JLB6	HNRNPH1							0	0.138098	0.14066	0.0797711	0.0609591						0	0.421807	0.320007	0.453557	0.152406		0		0.279952	0.683087		0.230333	0.279859		0.266664	0.00058492		0.106682	0.292983
Q96AG3|S2546_HUMAN Solute carrier family 25 member 46 OS=Homo sapiens OX=9606 GN=SLC25A46 PE=1 SV=1	Q96AG3	SLC25A46		0	0.176483	-0.110985	0.0525328	-0.0989223	0	-0.0227815	-0.00586077	-0.108785	0.0992705	0	0.145614	-0.0400334	0.229731	0.186547	0	0.124579	-0.0687875	0.0598613	0.0953298		0		0.105974	0.683087		-0.0564167	0.2286		0.0583351	0.00058492		0.0705561	0.23056
P13716|HEM2_HUMAN Delta-aminolevulinic acid dehydratase OS=Homo sapiens OX=9606 GN=ALAD PE=1 SV=1	P13716	ALAD		0	0.153629	0.92822	0.0551458	0.315024	0	0.578033	0.162872	0.251458	-0.198654	0	0.822015	1.09167	0.239564	0.219756	0	-0.124404	-0.473827	0.0397048	-0.435142		0		0.357318	0.683087		0.427234	0.181718		0.146468	0.0456639		-0.0247541	0.0189567
Q86X55|CARM1_HUMAN Histone-arginine methyltransferase CARM1 OS=Homo sapiens OX=9606 GN=CARM1 PE=1 SV=3	Q86X55	CARM1		0	0.0365866	-0.0120718	0.0369261	-0.00454436	0	0.0702715	0.0261411	-0.0605568	0.16144	0	0.0875961	0.0478855	0.137505	0.0666926	0	0.153665	0.0832576	-0.0552353	0.0464753		0		0.0870297	0.683087		0.0363031	0.148548		0.0146597	0.00058492		0.0675159	0.33189
P48147|PPCE_HUMAN Prolyl endopeptidase OS=Homo sapiens OX=9606 GN=PREP PE=1 SV=2	P48147	PREP		0	0.0128376	-0.0731127	-0.0500509	-0.0775434	0	-0.150141	0.0703123	-0.0124707	0.201714	0	-0.0891552	-0.111463	-0.00489728	0.0464596	0	-0.229709	0.0125685	-0.29803	0.170033		0		-0.114042	0.683087		-0.0254236	0.0658589		-0.0913623	0.00058492		0.0851658	0.27294
A8K070|A8K070_HUMAN COP9 signalosome complex subunit 1 OS=Homo sapiens OX=9606 GN=GPS1 PE=1 SV=1	A8K070	GPS1		0	0.0115847	-0.0308719	-0.0274572	0.156684	0	0.128866	-0.000901309	-0.0556634	-0.0206667	0	0.123037	-0.034528	-0.0104117	0.154854	0	0.494153	0.00362205	0.214749	0.193642		0		0.18941	0.683087		-0.0156698	0.0638848		0.0303042	0.00058492		0.121128	0.503036
O00763|ACACB_HUMAN Acetyl-CoA carboxylase 2 OS=Homo sapiens OX=9606 GN=ACACB PE=1 SV=3	O00763	ACACB		0	0.0941205	-0.0978206	0.00101603	0.0478578	0	0.0939882	0.0943344	-0.145522	0.0418299	0	0.0376662	-0.0447414	0.0975514	0.195378	0	0.403143	0.0380469	0.353402	0.186586		0		0.157229	0.683087		-0.00254521	0.00566407		0.076612	0.00058492		0.117913	0.539432
G3V325|G3V325_HUMAN ATP5MF-PTCD1 readthrough OS=Homo sapiens OX=9606 GN=ATP5MF-PTCD1 PE=4 SV=1	G3V325	ATP5MF-PTCD1		0	0.207306	0.215859	0.33487	0.130612	0	-0.0155255	0.221513	-0.149788	0.164644	0	0.0662426	0.159884	0.117715	0.127113	0	0.322439	0.124738	-0.920209	0.218497		0		0.145115	0.683087		0.180499	1.03309		-0.154353	0.00058492		0.160217	0.900496
Q96F85|CNRP1_HUMAN CB1 cannabinoid receptor-interacting protein 1 OS=Homo sapiens OX=9606 GN=CNRIP1 PE=1 SV=1	Q96F85	CNRIP1		0	0.0732661	0.294005	0.0277895	0.0260474	0					0	0.370026	0.313093	0.248438	0.226002							0		0.221646	0.683087		0.303549	0.919744		0.138114	0.00058492		0.126025	0.320632
A0A0A0MTH3|A0A0A0MTH3_HUMAN Integrin-linked protein kinase OS=Homo sapiens OX=9606 GN=ILK PE=1 SV=1	A0A0A0MTH3	ILK		0	-0.0113572	0.0394954	0.0150322	0.0749357	0	0.17913	0.0129608	-0.235363	0.0474282	0	0.0792976	0.149147	0.114104	0.0401804	0	0.366617	0.129711	0.198248	0.237535		0		0.153422	0.683087		0.0828285	0.249067		0.0230051	0.00058492		0.10002	0.425188
P31930|QCR1_HUMAN Cytochrome b-c1 complex subunit 1;mitochondrial OS=Homo sapiens OX=9606 GN=UQCRC1 PE=1 SV=3	P31930	UQCRC1		0	0.326982	0.128968	0.270321	0.120773	0	0.0461701	0.0537233	-0.172987	0.0862979	0	0.26728	0.305668	0.203024	-0.00167102	0	-0.0148564	-0.0596668	-0.157228	0.124463		0		0.156394	0.683087		0.107173	0.204077		0.0357825	0.00058492		0.0824658	0.45175
Q9Y4G6|TLN2_HUMAN Talin-2 OS=Homo sapiens OX=9606 GN=TLN2 PE=1 SV=4	Q9Y4G6	TLN2		0	0.103073	0.0345464	0.0526123	0.107022	0	0.135034	0.270702	-0.178577	0.109275	0	-0.0157412	-0.115528	-0.021575	0.122368	0	0.264144	0.0170865	0.175967	0.120237		0		0.121627	0.683087		0.0517019	0.0829095		0.00710698	0.00058492		0.114726	0.817797
O95810|CAVN2_HUMAN Caveolae-associated protein 2 OS=Homo sapiens OX=9606 GN=CAVIN2 PE=1 SV=3	O95810	CAVIN2		0	0.158533	0.173761	0.157735	0.237547	0	-0.0305105	-0.268698	-0.357802	-0.11981	0	0.113945	0.0446714	0.041766	0.120197	0	0.248258	-0.108941	0.111024	0.0558154		0		0.122557	0.683087		-0.0398017	0.0556469		-0.0118193	0.00058492		0.0734373	0.197489
P31323|KAP3_HUMAN cAMP-dependent protein kinase type II-beta regulatory subunit OS=Homo sapiens OX=9606 GN=PRKAR2B PE=1 SV=3	P31323	PRKAR2B							0	0.170085	0.250218	0.142416	0.471139						0	0.674828	0.528222	0.464694	1.08594		0		0.422457	0.683087		0.38922	0.396017		0.303555	0.00473085		0.778538	0.590733
Q99733|NP1L4_HUMAN Nucleosome assembly protein 1-like 4 OS=Homo sapiens OX=9606 GN=NAP1L4 PE=1 SV=1	Q99733	NAP1L4		0	0.2764	0.322724	0.361169	0.237073	0	0.0482632	0.109858	-0.23599	0.143348	0	-0.013898	-0.169987	-0.161022	-0.00211981	0	0.261268	0.0749221	0.110078	0.0832211		0		0.143008	0.683087		0.0843794	0.114614		0.0185587	0.00058492		0.11538	0.468421
Q9UKS6|PACN3_HUMAN Protein kinase C and casein kinase substrate in neurons protein 3 OS=Homo sapiens OX=9606 GN=PACSIN3 PE=1 SV=2	Q9UKS6	PACSIN3		0	-0.228501	-0.168257	-0.256134	-0.142867	0	-0.0142672	-0.0548998	-0.232708	0.113121	0	-0.0268204	-0.140535	0.168359	0.109642	0	-0.378732	0.165933	-0.245641	-0.00789948		0		-0.16208	0.683087		-0.0494398	0.0837745		-0.141531	0.00058492		0.0179988	0.0382736
P53611|PGTB2_HUMAN Geranylgeranyl transferase type-2 subunit beta OS=Homo sapiens OX=9606 GN=RABGGTB PE=1 SV=2	P53611	RABGGTB		0	0.0666152	0.0434744	0.00166041	0.0503443	0	-0.0070301	-0.279078	-0.373859	0.113508	0	0.232276	0.026746	0.137818	0.20537	0	0.486093	0.00573849	0.461464	0.155412		0		0.194488	0.683087		-0.0507796	0.0837745		0.0567711	0.00058492		0.131159	0.679303
Q9NQW7|XPP1_HUMAN Xaa-Pro aminopeptidase 1 OS=Homo sapiens OX=9606 GN=XPNPEP1 PE=1 SV=3	Q9NQW7	XPNPEP1		0	0.00407367	0.00170242	-0.10195	-0.0385223	0	0.110737	-0.0141623	-0.0960548	0.200134	0	0.0910672	-0.0123684	0.115763	0.13953	0	0.287952	0.0614512	0.158677	0.188276		0		0.123457	0.683087		0.00915572	0.0332971		0.019109	0.00058492		0.122354	0.462184
Q15286|RAB35_HUMAN Ras-related protein Rab-35 OS=Homo sapiens OX=9606 GN=RAB35 PE=1 SV=1	Q15286	RAB35							0	0.139947	-0.017913	-0.0983322	0.220579						0	0.23796	0.00598391	0.242244	0.500123		0		0.188953	0.683087		-0.00596454	0.0115795		0.0719559	0.00058492		0.360351	0.534446
Q12805|FBLN3_HUMAN EGF-containing fibulin-like extracellular matrix protein 1 OS=Homo sapiens OX=9606 GN=EFEMP1 PE=1 SV=2	Q12805	EFEMP1		0	0.00191377	-0.154444	0.034636	-0.0424091	0	0.314231	-0.101261	0.205192	0.129419	0	0.0437923	-0.0526007	0.202333	0.161257	0	0.618504	0.16214	0.506591	0.724052		0		0.24461	0.683087		-0.0365416	0.0651151		0.237188	0.0952729		0.24308	0.34054
P09486|SPRC_HUMAN SPARC OS=Homo sapiens OX=9606 GN=SPARC PE=1 SV=1	P09486	SPARC		0	-0.0805205	-0.20081	-0.163527	0.0721833	0	0.213025	-0.144908	-0.356804	-0.182828	0	0.18923	0.281348	0.359118	0.196756	0	0.273871	0.0767427	0.407239	0.275096		0		0.148901	0.683087		0.00309318	0.00247117		0.0615063	0.00058492		0.090302	0.184726
P49589|SYCC_HUMAN Cysteine--tRNA ligase;cytoplasmic OS=Homo sapiens OX=9606 GN=CARS PE=1 SV=3	P49589	CARS		0	0.0918143	0.018031	-0.047425	-0.111894	0	0.0126648	-0.173786	-0.504665	-0.170173	0	0.118193	0.0595059	0.164564	0.188447	0	0.38469	0.000819554	0.137648	0.117877		0		0.151841	0.683087		-0.0238573	0.0556469		-0.0624697	0.00058492		0.00606442	0.00832096
Q969T3|SNX21_HUMAN Sorting nexin-21 OS=Homo sapiens OX=9606 GN=SNX21 PE=2 SV=1	Q969T3	SNX21		0	0.0817094	0.92245	0.10374	0.274222	0					0	0.802301	1.02966	0.256429	0.362365							0		0.442005	0.683087		0.976056	1.68856		0.180084	0.00795531		0.318293	0.900496
Q9GZM7|TINAL_HUMAN Tubulointerstitial nephritis antigen-like OS=Homo sapiens OX=9606 GN=TINAGL1 PE=1 SV=1	Q9GZM7	TINAGL1		0	0.460154	0.287057	0.445062	0.525377	0	-0.104487	0.268428	-0.115358	0.100952	0	0.127912	0.158232	-0.106239	-0.0399935	0	0.646071	0.262888	0.634652	0.307766		0		0.282413	0.683087		0.244151	1.31329		0.214529	0.00058492		0.223525	0.425188
Q8NHH9|ATLA2_HUMAN Atlastin-2 OS=Homo sapiens OX=9606 GN=ATL2 PE=1 SV=2	Q8NHH9	ATL2		0	0.124914	0.0883899	-0.0325878	0.0567291	0	0.0497854	0.0499809	-0.564079	-0.135055	0	0.156381	0.118441	0.109573	0.151016	0	0.0294765	0.0940865	-0.0474648	0.0653063		0		0.0901393	0.683087		0.0877245	0.433477		-0.13364	0.00058492		0.0344992	0.0889513
Q13084|RM28_HUMAN 39S ribosomal protein L28;mitochondrial OS=Homo sapiens OX=9606 GN=MRPL28 PE=1 SV=4	Q13084	MRPL28		0	0.165428	0.310841	0.00834328	0.045553	0	-0.102802	-0.168634	-0.182393	-0.253532	0	0.32795	0.392131	0.296221	0.16448	0	0.350372	0.169143	0.295312	0.171404		0		0.185237	0.683087		0.17587	0.214944		0.104371	0.00058492		0.0319761	0.0475783
Q01130|SRSF2_HUMAN Serine/arginine-rich splicing factor 2 OS=Homo sapiens OX=9606 GN=SRSF2 PE=1 SV=4	Q01130	SRSF2							0	0.130419	0.00531228	0.00454537	0.180576						0	0.281615	0.160848	0.233226	0.415442		0		0.206017	0.683087		0.0830803	0.130577		0.118886	0.00058492		0.298009	0.503036
P51636|CAV2_HUMAN Caveolin-2 OS=Homo sapiens OX=9606 GN=CAV2 PE=1 SV=2	P51636	CAV2		0	0.394747	0.13025	0.395485	0.458431	0	-0.11201	-0.0393606	-0.138931	0.0379036	0	0.154353	0.0575928	-0.30609	0.165059	0	0.412156	-0.0208562	0.295693	0.538282		0		0.212311	0.683087		0.0319066	0.0844778		0.0615391	0.00058492		0.299919	0.599927
P09417|DHPR_HUMAN Dihydropteridine reductase OS=Homo sapiens OX=9606 GN=QDPR PE=1 SV=2	P09417	QDPR		0	-0.0395169	-0.107727	-0.000881053	-0.25219	0	-0.302329	0.126511	0.0580273	0.280254	0	-0.107177	-0.0801783	0.0395811	-0.00712621	0	-0.997205	-0.0853823	-0.375028	-0.0119129		0		-0.361557	0.683087		-0.0366941	0.0787723		-0.0695752	0.00058492		0.00225626	0.00255429
Q9Y315|DEOC_HUMAN Deoxyribose-phosphate aldolase OS=Homo sapiens OX=9606 GN=DERA PE=1 SV=2	Q9Y315	DERA		0	-0.122056	0.0020419	-0.665024	-0.554595	0	0.339981	-0.0186011	0.0743551	0.0346143	0	0.188118	0.485438	0.476712	0.52568	0	0.49505	-0.23012	0.391315	-0.0130005		0		0.225273	0.683087		0.0596897	0.0537563		0.0693394	0.00058492		-0.00182515	0.00153515
Q9NX18|SDHF2_HUMAN Succinate dehydrogenase assembly factor 2;mitochondrial OS=Homo sapiens OX=9606 GN=SDHAF2 PE=1 SV=1	Q9NX18	SDHAF2		0	-0.17211	0.153989	0.00145149	-0.025682	0	0.430514	0.22677	0.0806306	0.415712	0	0.299875	0.206633	0.321685	0.366825	0	0.377317	0.00477502	0.318828	0.471287		0		0.233899	0.683087		0.148042	0.431938		0.180649	0.0427736		0.307036	0.646007
Q9BUA6|MYL10_HUMAN Myosin regulatory light chain 10 OS=Homo sapiens OX=9606 GN=MYL10 PE=2 SV=2	Q9BUA6	MYL10		0	0.634238	0.197984	0.466874	-0.221011	0	0	0	0	0	0	0.43519	0.193201	-0.124297	-0.02883	0	0	0	0	0		0		0.267357	0.683087		0.0977963	0.235701		0.0856442	0.00058492		-0.0624603	0.221519
P18031|PTN1_HUMAN Tyrosine-protein phosphatase non-receptor type 1 OS=Homo sapiens OX=9606 GN=PTPN1 PE=1 SV=1	P18031	PTPN1		0	0.0521987	0.444686	0.0402845	0.672424	0	0.0812836	-0.0743823	-0.0803491	0.14459	0	0.88502	0.94662	0.629401	0.557677	0	0.263291	0.0233419	0.16314	0.207238		0		0.320448	0.683087		0.335067	0.224606		0.188119	0.00058492		0.395482	0.707884
P36955|PEDF_HUMAN Pigment epithelium-derived factor OS=Homo sapiens OX=9606 GN=SERPINF1 PE=1 SV=4	P36955	SERPINF1		0	-0.0381597	-0.0541865	-0.0376886	0.204194	0	0.442418	0.0804987	-0.121921	0.119914	0	0.0566801	0.0838933	0.0498652	0.103623	0	0.322015	0.264989	0.165647	0.159962		0		0.195738	0.683087		0.0937987	0.204077		0.0139758	0.00058492		0.146923	0.84594
Q8NFV4|ABHDB_HUMAN Protein ABHD11 OS=Homo sapiens OX=9606 GN=ABHD11 PE=1 SV=1	Q8NFV4	ABHD11		0	0.292887	0.00966012	0.0719096	0.110864	0	-0.051148	-0.170121	-0.26777	-0.0514216	0	0.166005	-0.00302799	0.102988	0.0801722	0	0.138178	0.0273106	0.0970481	0.20221		0		0.136481	0.683087		-0.0340446	0.0837745		0.00104395	0.0001404		0.0854561	0.324331
Q15417|CNN3_HUMAN Calponin-3 OS=Homo sapiens OX=9606 GN=CNN3 PE=1 SV=1	Q15417	CNN3		0	0.0690129	-0.110221	0.115808	0.182733	0	0.409013	-0.139217	-0.29201	0.0219355	0	-0.063233	0.310264	0.192682	0.0936848	0	0.50649	-0.15441	0.528998	-0.0503438		0		0.230321	0.683087		-0.0233963	0.0279045		0.136369	0.00058492		0.0620023	0.234125
J3KQL8|J3KQL8_HUMAN Apolipoprotein L2 OS=Homo sapiens OX=9606 GN=APOL2 PE=1 SV=2	J3KQL8	APOL2		0	0.431667	-0.191564	0.888866	-0.00801424	0	0.13729	-0.284059	-0.110934	0.26685	0	0.0524211	-0.0307985	-0.0267826	0.0415559	0	0.03595	0.0101317	-0.0301192	-0.0379248		0		0.164332	0.683087		-0.124073	0.24524		0.180257	0.00058492		0.0656168	0.184726
P28907|CD38_HUMAN ADP-ribosyl cyclase/cyclic ADP-ribose hydrolase 1 OS=Homo sapiens OX=9606 GN=CD38 PE=1 SV=2	P28907	CD38		0	0.0636042	0.0782713	-0.120874	-0.0263178	0	0.0410834	0.0249054	-0.107658	0.115651	0	0.0837024	0.0458561	0.0335286	0.063983	0	0.305403	0.300222	0.14831	0.275376		0		0.123448	0.683087		0.112314	0.243011		-0.0116735	0.00058492		0.107173	0.358539
P00488|F13A_HUMAN Coagulation factor XIII A chain OS=Homo sapiens OX=9606 GN=F13A1 PE=1 SV=4	P00488	F13A1		0	0.188734	0.0121292	0.381025	0.448795	0	0.214675	-0.0309056	-0.149212	-0.10848	0	-0.0884102	0.569667	-0.2547	0.0695713	0	0.4657	0.271935	0.184385	0.0409034		0		0.195175	0.683087		0.205707	0.2286		0.0403745	0.00058492		0.112697	0.200542
A0A1B0GVY1|A0A1B0GVY1_HUMAN E3 ubiquitin-protein ligase NEDD4-like OS=Homo sapiens OX=9606 GN=NEDD4L PE=1 SV=1	A0A1B0GVY1	NEDD4L		0	0.788542	0.833815	0.9519	0.49239	0	-0.173268	-0.312952	-0.30971	0.0121898	0	0.235665	-0.0791401	-0.382455	-0.247879	0	0.473928	0.760715	0.300164	0.392977		0		0.331217	0.683087		0.30061	0.158044		0.139974	0.00058492		0.162419	0.204838
E9PHI4|E9PHI4_HUMAN SUN domain-containing protein 1 OS=Homo sapiens OX=9606 GN=SUN1 PE=1 SV=1	E9PHI4	SUN1		0	0.091293	0.17056	0.197173	0.271877	0	0.181636	-0.148555	-0.140822	0.0801859	0	-0.0302045	0.125053	-0.0325981	-0.017298	0	0.366294	0.151854	0.273022	0.184373		0		0.152255	0.683087		0.0747282	0.141504		0.0741936	0.00058492		0.129785	0.442827
Q03154|ACY1_HUMAN Aminoacylase-1 OS=Homo sapiens OX=9606 GN=ACY1 PE=1 SV=1	Q03154	ACY1		0	0.0302742	-0.191642	-0.104024	-0.159122	0	-0.171184	0.0758165	-0.0979715	0.179904	0	-0.149907	-0.217195	-0.0669909	-0.0998019	0	-0.56365	0.0555256	-0.603953	-0.0146092		0		-0.213617	0.683087		-0.0693736	0.12372		-0.218235	0.00473085		-0.0234074	0.0444553
Q7Z7K0|COXM1_HUMAN COX assembly mitochondrial protein homolog OS=Homo sapiens OX=9606 GN=CMC1 PE=1 SV=1	Q7Z7K0	CMC1		0	0.0413319	0.0157689	-0.0984911	-0.0913236	0	0.246482	0.10304	-0.0684715	-0.0322305	0	0.0878523	-0.232602	-0.181995	0.0617023	0	0.0493428	-0.140919	0.115914	0.0528102		0		0.106252	0.683087		-0.0636782	0.108795		-0.0582609	0.00058492		-0.0022604	0.0051384
P22105|TENX_HUMAN Tenascin-X OS=Homo sapiens OX=9606 GN=TNXB PE=1 SV=5	P22105	TNXB		0	-0.083564	-0.173634	-0.202829	-0.164508	0	0.104364	-0.202945	-0.355498	-0.0407406	0	0.396629	0.168666	0.663912	0.325563	0	0.627866	-0.0589343	0.307081	0.261625		0		0.261324	0.683087		-0.066712	0.103685		0.103167	0.00058492		0.095485	0.162127
P20338|RAB4A_HUMAN Ras-related protein Rab-4A OS=Homo sapiens OX=9606 GN=RAB4A PE=1 SV=3	P20338	RAB4A		0	0.23295	-0.138881	0.127466	0.0122789	0	0.0211996	-0.0498574	-0.13791	0.136072	0	0.0283894	-0.0683018	0.100437	0.189728	0	0.167232	0.100463	0.0727028	0.136152		0		0.112443	0.683087		-0.0391443	0.086843		0.0406737	0.00058492		0.118558	0.595605
Q9HAV7|GRPE1_HUMAN GrpE protein homolog 1;mitochondrial OS=Homo sapiens OX=9606 GN=GRPEL1 PE=1 SV=2	Q9HAV7	GRPEL1		0	0.302664	0.0599235	0.241006	0.232895	0	-0.0774241	0.0572671	-0.134381	0.14402	0	0.146529	-0.0401374	0.181062	0.149921	0	0.231153	0.00834214	0.146502	0.336735		0		0.15073	0.683087		0.0213488	0.0716367		0.108547	0.00058492		0.215893	0.900496
Q9Y2Z0|SGT1_HUMAN Protein SGT1 homolog OS=Homo sapiens OX=9606 GN=SUGT1 PE=1 SV=3	Q9Y2Z0	SUGT1		0	0.0646886	0.023539	0.0243343	-0.024262	0	0.0332378	0.0197268	-0.015674	0.28556	0	0.089319	0.123834	0.0474104	0.170934	0	0.305428	-0.0646402	0.0914669	0.23296		0		0.123168	0.683087		0.025615	0.06867		0.0368844	0.00058492		0.166298	0.541291
P83111|LACTB_HUMAN Serine beta-lactamase-like protein LACTB;mitochondrial OS=Homo sapiens OX=9606 GN=LACTB PE=1 SV=2	P83111	LACTB		0	0.131059	0.119366	0.164725	0.138402	0	0.0984472	0.0583668	-0.0818602	-0.05509	0	0.0289062	-0.142268	-0.00669152	-0.0130641	0	0.0697503	-0.095421	0.0983428	0.0814845		0		0.0820408	0.683087		-0.0149892	0.0284203		0.0436292	0.00058492		0.037933	0.137284
Q9UQ80|PA2G4_HUMAN Proliferation-associated protein 2G4 OS=Homo sapiens OX=9606 GN=PA2G4 PE=1 SV=3	Q9UQ80	PA2G4		0	0.0521145	0.159209	0.0601508	0.0850175	0	0.131924	-0.128456	-0.288505	-0.00324453	0	0.0261886	-0.0368151	0.0242123	0.0409294	0	0.357327	0.0397674	0.244794	0.0463605		0		0.141889	0.683087		0.00842631	0.0168695		0.010163	0.00058492		0.0422657	0.257891
Q9Y276|BCS1_HUMAN Mitochondrial chaperone BCS1 OS=Homo sapiens OX=9606 GN=BCS1L PE=1 SV=1	Q9Y276	BCS1L		0	0.157681	0.0357002	0.162896	0.156489	0	-0.0308598	0.0983068	-0.0809285	0.232162	0	0.167108	-0.0306459	0.117581	0.17445	0	0.123016	-0.130708	0.0579724	0.206731		0		0.104236	0.683087		-0.00683678	0.0161568		0.0643803	0.00058492		0.192458	1.00298
Q969V3|NCLN_HUMAN Nicalin OS=Homo sapiens OX=9606 GN=NCLN PE=1 SV=2	Q969V3	NCLN		0	0.0272266	-0.158556	-0.027516	-0.0229923	0	0.0497505	-0.0361036	-0.113951	0.0559544	0	0.12918	0.0737944	0.217478	0.298811	0	0.34961	0.0976368	0.228483	0.266535		0		0.138942	0.683087		-0.00580712	0.0115795		0.0761236	0.00058492		0.149577	0.425188
Q0VAK6|LMOD3_HUMAN Leiomodin-3 OS=Homo sapiens OX=9606 GN=LMOD3 PE=1 SV=1	Q0VAK6	LMOD3		0	-0.29103	0.0418193	0.0099399	-0.298804	0	-0.253879	-0.223724	-0.129938	0.0255693	0	0.0910498	0.30674	-0.18811	0.413093	0	-0.170304	-0.1492	-0.10576	-0.184266		0		-0.156041	0.683087		-0.00609102	0.00572646		-0.103467	0.00360751		-0.011102	0.00885696
P07358|CO8B_HUMAN Complement component C8 beta chain OS=Homo sapiens OX=9606 GN=C8B PE=1 SV=3	P07358	C8B		0	-0.15347	0.0430619	-0.0869334	0.204995	0	0.593706	0.0933589	0.209013	-0.314847	0	0.14371	0.328349	0.172928	0.157046	0	0.759023	0.19653	0.668591	-0.276602		0		0.335742	0.683087		0.165325	0.405246		0.2409	0.00058492		-0.0573518	0.0668283
P43034|LIS1_HUMAN Platelet-activating factor acetylhydrolase IB subunit alpha OS=Homo sapiens OX=9606 GN=PAFAH1B1 PE=1 SV=2	P43034	PAFAH1B1		0	0.0494883	-0.0391248	0.118939	-0.0474671	0	-0.25354	-0.102603	-0.133257	-0.645877	0	-0.0822445	-0.213898	0.144341	-0.0402502	0	-0.408993	-0.0701375	0.0215466	-0.084675		0		-0.173822	0.683087		-0.106441	0.362786		0.0378922	0.00058492		-0.204567	0.318511
P04899|GNAI2_HUMAN Guanine nucleotide-binding protein G(i) subunit alpha-2 OS=Homo sapiens OX=9606 GN=GNAI2 PE=1 SV=3	P04899	GNAI2		0	0.0265246	-0.158068	-0.0766189	0.0785217	0	0.257313	-0.102826	-0.294456	-0.024857	0	-0.00126069	-0.052258	0.215057	0.387606	0	0.458251	-0.00339105	0.571867	0.290073		0		0.185207	0.683087		-0.0791358	0.24841		0.103962	0.00058492		0.182836	0.442143
O95169|NDUB8_HUMAN NADH dehydrogenase [ubiquinone] 1 beta subcomplex subunit 8;mitochondrial OS=Homo sapiens OX=9606 GN=NDUFB8 PE=1 SV=1	O95169	NDUFB8		0	0.243108	-0.00739603	0.104536	-0.0200807	0	0.170826	-0.118782	-0.347512	-0.35577	0	0.0935917	-0.0728981	0.183597	0.116803	0	-0.0329136	-0.370389	-0.79195	0.11455		0		0.118653	0.683087		-0.142366	0.24524		-0.212832	0.00058492		-0.0361244	0.0488101
Q8WZA0|LZIC_HUMAN Protein LZIC OS=Homo sapiens OX=9606 GN=LZIC PE=1 SV=1	Q8WZA0	LZIC		0	-0.00915073	0.144473	-0.100388	0.0300519	0	0.0434254	-0.00668189	-0.117895	0.121555	0	0.219834	0.197599	0.202951	0.146693	0	0.387643	0.00110793	0.240407	0.157459		0		0.160438	0.683087		0.0841244	0.215561		0.0562689	0.00058492		0.11394	0.633702
A0A0A0MS08|A0A0A0MS08_HUMAN Immunoglobulin heavy constant gamma 1 (Fragment) OS=Homo sapiens OX=9606 GN=IGHG1 PE=1 SV=1	A0A0A0MS08	IGHG1		0	-0.296581	0.695683	-0.0728763	0.67656	0	0.41226	0.00111167	0.199018	-0.482117	0	0.942563	1.31707	0.145195	0.336266	0	0.618206	-0.161775	0.423712	-0.323152		0		0.419112	0.683087		0.463024	0.212471		0.173762	0.00360751		0.0518893	0.0247751
O75439|MPPB_HUMAN Mitochondrial-processing peptidase subunit beta OS=Homo sapiens OX=9606 GN=PMPCB PE=1 SV=2	O75439	PMPCB		0	0.0826968	-0.134609	0.00263266	-0.0223346	0	0.0387108	0.025151	-0.134667	0.0153374	0	0.0524501	-0.102595	0.132845	0.164842	0	0.189033	-0.0403301	0.222709	0.0668879		0		0.0907228	0.683087		-0.0630956	0.20896		0.0558798	0.00058492		0.0561832	0.244466
E5RHU5|E5RHU5_HUMAN Protein FAM49B (Fragment) OS=Homo sapiens OX=9606 GN=FAM49B PE=1 SV=1	E5RHU5	FAM49B		0	0.638491	0.635053	0.749756	0.504309	0	0	0	0	0	0	0.408361	0.0831807	-0.206148	-0.0583203	0	0	0	0	0		0		0.261713	0.683087		0.179559	0.1811		0.135902	0.00058492		0.111497	0.174839
Q9NPF4|OSGEP_HUMAN Probable tRNA N6-adenosine threonylcarbamoyltransferase OS=Homo sapiens OX=9606 GN=OSGEP PE=1 SV=1	Q9NPF4	OSGEP		0	0.124871	-0.170927	0.0787799	0.0598885	0	0.0714402	-0.0646331	-0.208986	-0.00416305	0	0.0277258	-0.294303	-0.0430545	-0.0263126	0	0.442785	0.203482	0.171021	-0.0325677		0		0.166705	0.683087		-0.0815953	0.103066		-0.000559855	0.0001404		-0.000788717	0.00255429
Q00688|FKBP3_HUMAN Peptidyl-prolyl cis-trans isomerase FKBP3 OS=Homo sapiens OX=9606 GN=FKBP3 PE=1 SV=1	Q00688	FKBP3		0	0.0885942	-0.0563464	0.0160146	-0.0684995	0	-0.165999	0.0896663	-0.218031	-0.0332568	0	-0.346491	-0.249503	-0.102572	-0.0880613	0	-0.822815	-0.0103037	-0.465208	0.195454		0		-0.311678	0.683087		-0.0566217	0.100949		-0.192449	0.0135242		0.001409	0.00255429
P58107|EPIPL_HUMAN Epiplakin OS=Homo sapiens OX=9606 GN=EPPK1 PE=1 SV=3	P58107	EPPK1		0	0.553777	0.530444	0.286405	-0.193786	0	0	0	0	0	0	0.366307	-0.144748	-0.111775	-0.525268	0	0	0	0	0		0		0.230021	0.683087		0.096424	0.0846415		0.0436574	0.00058492		-0.179763	0.331927
P62318|SMD3_HUMAN Small nuclear ribonucleoprotein Sm D3 OS=Homo sapiens OX=9606 GN=SNRPD3 PE=1 SV=1	P62318	SNRPD3		0	-0.0775033	-0.128124	-0.291496	-0.203124	0	1.06208	0.0904147	0.583819	0.407694	0	0.190904	0.325633	0.141945	0.0940497	0	0.38839	-0.0285656	0.826911	0.521413		0		0.390967	0.683087		0.0648395	0.0841179		0.315295	0.00058492		0.205008	0.289047
Q7L9L4|MOB1B_HUMAN MOB kinase activator 1B OS=Homo sapiens OX=9606 GN=MOB1B PE=1 SV=3	Q7L9L4	MOB1B		0	0.0390587	-0.117183	-0.176596	-0.199152	0	0.15454	-0.0656591	-0.184795	0.0985076	0	0.0191078	-0.0837001	0.04786	0.170642	0	0.34853	0.118086	0.329493	0.0766726		0		0.140309	0.683087		-0.0371143	0.0837745		0.00399055	0.000419004		0.0366677	0.0693129
Q12905|ILF2_HUMAN Interleukin enhancer-binding factor 2 OS=Homo sapiens OX=9606 GN=ILF2 PE=1 SV=2	Q12905	ILF2		0	-0.0935118	-0.052809	0.0896579	0.1006	0	0.470825	-0.159577	-0.117419	0.0869982	0	0.0840334	0.139068	0.0651593	0.0535562	0	0.628612	-0.0402072	0.620824	-0.142813		0		0.27249	0.683087		-0.0283811	0.0556469		0.164556	0.00058492		0.0245855	0.0624399
O94811|TPPP_HUMAN Tubulin polymerization-promoting protein OS=Homo sapiens OX=9606 GN=TPPP PE=1 SV=1	O94811	TPPP		0	0.229997	-0.0084138	0.00203226	-0.0639679	0	0.0122338	0.0205875	-0.240987	-0.140928	0	0.0247113	-0.112569	0.0350125	0.214127	0	0.469768	0.222514	0.294191	0.582299		0		0.184178	0.683087		0.0305297	0.0556469		0.0225621	0.00058492		0.147883	0.192351
H0YI09|H0YI09_HUMAN Methyltransferase-like protein 7A (Fragment) OS=Homo sapiens OX=9606 GN=METTL7A PE=1 SV=1	H0YI09	METTL7A		0	0.168975	-0.19479	0.121486	0.0207351	0	0.172454	0.0929806	-0.140678	0.0719876	0	-0.0669695	-0.0801864	0.123958	0.0121404	0	0.239932	0.372654	0.16415	0.508134		0		0.128598	0.683087		0.0476646	0.0522363		0.067229	0.00058492		0.153249	0.292239
Q9HAN9|NMNA1_HUMAN Nicotinamide/nicotinic acid mononucleotide adenylyltransferase 1 OS=Homo sapiens OX=9606 GN=NMNAT1 PE=1 SV=1	Q9HAN9	NMNAT1		0	0.228122	0.0231156	0.129478	-0.00303254	0	-0.0222054	-0.139222	-0.0570928	0.0510999	0	0.054712	-0.101489	0.115128	-0.0615094	0	0.261216	0.119475	-0.114284	-0.176783		0		0.130461	0.683087		-0.0245301	0.050104		0.0183073	0.00058492		-0.0475562	0.16881
Q9Y450|HBS1L_HUMAN HBS1-like protein OS=Homo sapiens OX=9606 GN=HBS1L PE=1 SV=1	Q9Y450	HBS1L		0	0.364781	0.021471	0.390323	0.0444546	0	0.029707	0.0374786	-0.155562	0.127211	0	0.0878111	-0.308677	-0.129267	-0.0984137	0	0.0813586	0.14772	0.119026	0.0713374		0		0.140914	0.683087		-0.025502	0.0322433		0.0561298	0.00058492		0.0361474	0.116001
P52789|HXK2_HUMAN Hexokinase-2 OS=Homo sapiens OX=9606 GN=HK2 PE=1 SV=2	P52789	HK2		0	0.292784	0.34392	0.272564	0.250937	0	-0.0205977	-0.306099	-0.168572	-0.0459194	0	0.123209	0.222444	-0.00402438	0.11505	0	0.105436	-0.442594	0.0578972	-0.112974		0		0.125208	0.683087		-0.0455821	0.0302321		0.0394663	0.00058492		0.0517735	0.108511
P67809|YBOX1_HUMAN Nuclease-sensitive element-binding protein 1 OS=Homo sapiens OX=9606 GN=YBX1 PE=1 SV=3	P67809	YBX1		0	0.193451	0.285006	0.2227	0.369053	0	0.330916	0.131385	-0.521852	-0.0994968	0	-0.115502	-0.268167	0.0253856	0.100321	0	0.300095	-0.206927	0.31406	0.0198741		0		0.17724	0.683087		-0.014676	0.0149119		0.0100734	0.00058492		0.0974379	0.204838
P68431|H31_HUMAN Histone H3.1 OS=Homo sapiens OX=9606 GN=HIST1H3A PE=1 SV=2	P68431	HIST1H3A		0	0.0926929	0.146174	0.0175547	0.083582	0					0	0.184248	0.0101297	0.264284	-0.0211996							0		0.13847	0.683087		0.0781516	0.165382		0.140919	0.00058492		0.0311912	0.0805411
P22626|ROA2_HUMAN Heterogeneous nuclear ribonucleoproteins A2/B1 OS=Homo sapiens OX=9606 GN=HNRNPA2B1 PE=1 SV=2	P22626	HNRNPA2B1		0	0.353351	0.0796708	0.210415	0.271839	0	0.0833779	-0.0757527	-0.250429	0.0881223	0	-0.0740995	-0.251294	0.0435701	0.0320711	0	0.490937	-0.0263435	0.441317	0.260454		0		0.213392	0.683087		-0.0684298	0.137833		0.111218	0.00058492		0.163122	0.595605
Q7Z434|MAVS_HUMAN Mitochondrial antiviral-signaling protein OS=Homo sapiens OX=9606 GN=MAVS PE=1 SV=2	Q7Z434	MAVS		0	-0.00442143	-0.0809947	-0.107573	-0.174945	0	0.0732424	-0.0178429	-0.232516	0.0906252	0	0.140597	-0.0309231	0.0893335	0.113637	0	0.170873	0.0622039	-0.00521821	0.0450539		0		0.0950728	0.683087		-0.0168892	0.0538147		-0.0639933	0.00058492		0.018593	0.0370167
P09651|ROA1_HUMAN Heterogeneous nuclear ribonucleoprotein A1 OS=Homo sapiens OX=9606 GN=HNRNPA1 PE=1 SV=5	P09651	HNRNPA1		0	0.0971193	0.0176285	0.089269	0.18106	0	0.746407	-0.0965942	-0.256983	-0.200666	0	-0.14113	-0.307033	0.121046	-0.010239	0	0.730225	-1.08729	0.78061	-0.204048		0		0.358155	0.683087		-0.368323	0.231848		0.183486	0.00058492		-0.0584732	0.113548
O75663|TIPRL_HUMAN TIP41-like protein OS=Homo sapiens OX=9606 GN=TIPRL PE=1 SV=2	O75663	TIPRL		0	-0.112494	-0.261985	-0.311649	-0.235649	0	-0.175986	-0.0685323	-0.213781	0.00739077	0	0.0423694	-0.127428	0.0819014	0.117793	0	-0.415993	0.227954	-0.444061	0.150265		0		-0.165526	0.683087		-0.0574977	0.0702782		-0.221897	0.040084		0.00994998	0.0150038
Q9Y570|PPME1_HUMAN Protein phosphatase methylesterase 1 OS=Homo sapiens OX=9606 GN=PPME1 PE=1 SV=3	Q9Y570	PPME1		0	-0.00349507	0.100501	-0.148686	-0.0825534	0	0.0315953	0.0362446	-0.186862	0.108544	0	0.226834	0.262559	0.161677	0.203799	0	0.42083	0.0699646	0.194805	-0.0574732		0		0.168941	0.683087		0.117317	0.300247		0.00523364	0.00058492		0.0430792	0.10409
Q5TDF0|Q5TDF0_HUMAN Cancer-related nucleoside-triphosphatase OS=Homo sapiens OX=9606 GN=NTPCR PE=1 SV=1	Q5TDF0	NTPCR		0	0.0395692	0.137681	0.0823144	0.120927	0	0.0737168	0.0255196	-0.189125	0.142711	0	0.082156	0.00974863	-0.00622287	0.0824559	0	0.389602	0.0874	0.540098	0.25274		0		0.146261	0.683087		0.0650874	0.231848		0.106766	0.00058492		0.149708	0.709505
Q9Y3C8|UFC1_HUMAN Ubiquitin-fold modifier-conjugating enzyme 1 OS=Homo sapiens OX=9606 GN=UFC1 PE=1 SV=3	Q9Y3C8	UFC1		0	-0.00612618	-0.0301089	-0.102439	-0.0541368	0	0.0745306	0.0360713	-0.151269	0.133582	0	0.127929	0.0205636	0.133284	0.189324	0	0.202827	0.123855	0.0316162	-0.0197905		0		0.0997901	0.683087		0.0375951	0.124989		-0.022202	0.00058492		0.0622447	0.20256
Q9P2X3|IMPCT_HUMAN Protein IMPACT OS=Homo sapiens OX=9606 GN=IMPACT PE=1 SV=2	Q9P2X3	IMPACT		0	0.0431808	0.0574206	0.0846514	-0.0608218	0	0.0367407	-0.0570709	-0.106928	0.0373059	0	0.12168	0.155491	0.283942	0.263177	0	0.38777	-0.0480142	0.251957	0.120806		0		0.147343	0.683087		0.0269566	0.060053		0.128405	0.00058492		0.0901167	0.272358
P08559|ODPA_HUMAN Pyruvate dehydrogenase E1 component subunit alpha;somatic form;mitochondrial OS=Homo sapiens OX=9606 GN=PDHA1 PE=1 SV=3	P08559	PDHA1		0	0.10192	-0.0626241	0.0629983	-0.0756642	0	0.119659	-0.114517	-0.370183	-0.24937	0	0.0333411	-0.0944364	0.184639	0.0213151	0	0.0593451	-0.0810146	0.0283961	-0.242689		0		0.0785661	0.683087		-0.088148	0.449866		-0.0235372	0.00058492		-0.136602	0.448326
A0A087WU53|A0A087WU53_HUMAN Magnesium transporter protein 1 OS=Homo sapiens OX=9606 GN=MAGT1 PE=1 SV=1	A0A087WU53	MAGT1		0	0.0791612	0.100635	0.0617931	0.106058	0	0.0179501	-0.116127	-0.22732	0.15194	0	0.0858393	0.115792	0.136698	0.216022	0	0.3149	0.168949	0.0643955	0.130642		0		0.124463	0.683087		0.0673122	0.147892		0.00889156	0.00058492		0.151165	0.857338
Q96HE7|ERO1A_HUMAN ERO1-like protein alpha OS=Homo sapiens OX=9606 GN=ERO1A PE=1 SV=2	Q96HE7	ERO1A		0	-0.101904	-0.21464	-0.0924946	-0.177958	0	0.285552	0.0628897	-0.122078	0.127033	0	0.206291	-0.0139574	0.193254	0.226871	0	0.220981	-0.0704452	0.248583	0.141911		0		0.15273	0.683087		-0.0590382	0.136282		0.056816	0.00058492		0.0794641	0.179993
P07451|CAH3_HUMAN Carbonic anhydrase 3 OS=Homo sapiens OX=9606 GN=CA3 PE=1 SV=3	P07451	CA3		0	-0.203706	-0.261414	-0.0600444	-0.0810524	0	-0.311972	-0.106568	-0.340276	-0.182739	0	-0.397979	-0.463337	-0.299961	-0.438132	0	0.134849	0.492629	0.347272	0.130987		0		-0.194702	0.683087		-0.0846723	0.0556469		-0.0882524	0.00058492		-0.142734	0.267021
Q7KZF4|SND1_HUMAN Staphylococcal nuclease domain-containing protein 1 OS=Homo sapiens OX=9606 GN=SND1 PE=1 SV=1	Q7KZF4	SND1		0	0.0778047	-0.097418	-0.043668	-0.0869025	0	0.235041	0.0644933	0.0232414	0.265264	0	-0.0488057	-0.107697	-0.1429	-0.023504	0	0.343594	0.255083	0.396157	0.331443		0		0.151908	0.683087		0.0286154	0.0425938		0.0582076	0.00058492		0.121575	0.258553
P13804|ETFA_HUMAN Electron transfer flavoprotein subunit alpha;mitochondrial OS=Homo sapiens OX=9606 GN=ETFA PE=1 SV=1	P13804	ETFA		0	0.235248	0.184977	0.326183	0.152747	0	-0.0652732	-0.0180566	-2.99885	-0.147003	0	0.107569	0.0744422	0.0442488	0.0148713	0	0.407666	-0.148837	0.133822	-0.288336		0		0.171302	0.683087		0.0231312	0.0399448		-0.623648	0.00058492		-0.0669302	0.128972
P11279|LAMP1_HUMAN Lysosome-associated membrane glycoprotein 1 OS=Homo sapiens OX=9606 GN=LAMP1 PE=1 SV=3	P11279	LAMP1		0	-0.0166816	-0.147901	-0.0745507	-0.0517823	0	0.146979	0.0511193	-0.0113955	0.102321	0	0.0737654	0.0612397	0.253917	0.286349	0	0.251029	-0.00244929	0.168578	0.0917068		0		0.113773	0.683087		-0.00949776	0.0231889		0.0841373	0.00058492		0.107149	0.329798
P23368|MAOM_HUMAN NAD-dependent malic enzyme;mitochondrial OS=Homo sapiens OX=9606 GN=ME2 PE=1 SV=1	P23368	ME2		0	0.0549935	0.0628351	0.0891771	0.136715	0	0.0583888	-0.0940902	-0.122277	-0.15294	0	0.1568	0.00269775	0.18451	0.14523	0	0.0572938	-0.0123056	0.0560917	0.0436033		0		0.0818691	0.683087		-0.0102157	0.0293395		0.0518756	0.00058492		0.0431522	0.102816
Q5VW32|BROX_HUMAN BRO1 domain-containing protein BROX OS=Homo sapiens OX=9606 GN=BROX PE=1 SV=1	Q5VW32	BROX		0	-0.0351933	-0.0128266	-0.284335	-0.128308	0	0.304189	0.207102	0.127037	0.400745	0	0.0363154	0.0511363	0.00802832	0.0554979	0	0.321582	0.152366	0.167951	0.231518		0		0.156723	0.683087		0.0994444	0.248091		0.0046703	0.00058492		0.139863	0.27225
A6NGQ3|A6NGQ3_HUMAN Obscurin OS=Homo sapiens OX=9606 GN=OBSCN PE=1 SV=5	A6NGQ3	OBSCN		0	-0.21758	-0.170012	-0.230293	-0.162415	0	-0.10895	-0.197297	-0.230056	-0.17782	0	-0.0587147	-0.0718167	-0.0114162	0.0085178	0	-0.00923614	0.0963603	0.113594	0.0249955		0		-0.0986202	0.683087		-0.0856912	0.181689		-0.0895428	0.00058492		-0.0766804	0.278863
I3L170|I3L170_HUMAN Microtubule-associated protein OS=Homo sapiens OX=9606 GN=MAPT PE=1 SV=1	I3L170	MAPT							0	-0.651592	-0.051812	-0.55513	0.168638						0	-0.137765	0.182639	-0.573757	-0.277392		0		-0.394678	0.683087		0.0654136	0.0715182		-0.564444	0.309774		-0.0543768	0.0398788
Q9H0L4|CSTFT_HUMAN Cleavage stimulation factor subunit 2 tau variant OS=Homo sapiens OX=9606 GN=CSTF2T PE=1 SV=1	Q9H0L4	CSTF2T		0	0.0741612	0.396982	0.120074	0.171108	0					0	0.222998	0.408925	0.379241	0.11952							0		0.14858	0.683087		0.402954	1.1778		0.249658	0.0486064		0.145314	0.543333
Q15119|PDK2_HUMAN [Pyruvate dehydrogenase (acetyl-transferring)] kinase isozyme 2;mitochondrial OS=Homo sapiens OX=9606 GN=PDK2 PE=1 SV=2	Q15119	PDK2		0	0.188667	-0.0595166	0.0959705	-0.0219833	0	0.00880144	0.115185	-0.10793	0.116501	0	0.2578	-0.0218099	0.19115	0.111252	0	0.0180938	-0.170238	0.0759347	0.146821		0		0.118341	0.683087		-0.0340947	0.0685018		0.0637812	0.00058492		0.0881476	0.425188
A0A2R8YEU4|A0A2R8YEU4_HUMAN Tropomyosin alpha-4 chain (Fragment) OS=Homo sapiens OX=9606 GN=TPM4 PE=1 SV=1	A0A2R8YEU4	TPM4							0	0.117163	0.193667	0.218298	0.824267						0	0.460138	-0.0720496	0.28508	-0.0601923		0		0.28865	0.683087		0.0608086	0.0606958		0.251689	0.0672927		0.382037	0.210335
Q9H008|LHPP_HUMAN Phospholysine phosphohistidine inorganic pyrophosphate phosphatase OS=Homo sapiens OX=9606 GN=LHPP PE=1 SV=2	Q9H008	LHPP		0	0.318802	0.297943	0.388719	0.587712	0					0	0.0587426	-0.152707	0.288681	0.142412							0		0.188772	0.683087		0.0726181	0.0592201		0.3387	0.206491		0.365062	0.503036
E7EPT4|E7EPT4_HUMAN NADH dehydrogenase [ubiquinone] flavoprotein 2;mitochondrial OS=Homo sapiens OX=9606 GN=NDUFV2 PE=1 SV=1	E7EPT4	NDUFV2		0	0.243865	0.034166	0.179862	0.0171167	0	0.00866684	0.0455604	0.0674559	-0.00127781	0	0.0667931	-0.149684	0.0731058	0.0543687	0	0.0972072	-0.000696848	0.180872	0.260462		0		0.104133	0.683087		-0.0176636	0.0429424		0.125324	0.082337		0.0826674	0.27709
A0A0C4DG17|A0A0C4DG17_HUMAN 40S ribosomal protein SA OS=Homo sapiens OX=9606 GN=RPSA PE=1 SV=1	A0A0C4DG17	RPSA		0	-0.058119	-0.14547	-0.151975	-0.169818	0	0.23128	0.0254045	-0.180174	0.0651016	0	0.0963364	0.0216589	0.113349	0.048722	0	0.248921	0.0373048	0.1933	0.0923782		0		0.129605	0.683087		-0.0152756	0.0385433		-0.00637538	0.00058492		0.00909589	0.0184942
E7EQN9|E7EQN9_HUMAN Type II inositol 3;4-bisphosphate 4-phosphatase OS=Homo sapiens OX=9606 GN=INPP4B PE=1 SV=1	E7EQN9	INPP4B		0	0.0754314	0.187099	-0.0565404	-0.0351361	0					0	0.216447	0.101243	0.215241	0.252845							0		0.145939	0.683087		0.144171	0.353349		0.0793505	0.00058492		0.108854	0.20767
Q92667|AKAP1_HUMAN A-kinase anchor protein 1;mitochondrial OS=Homo sapiens OX=9606 GN=AKAP1 PE=1 SV=1	Q92667	AKAP1		0	0.152638	0.092227	0.0409271	0.0765047	0	-0.0471718	-0.125854	-0.269242	0.00269474	0	0.118337	0.0312535	0.0676268	0.133043	0	0.37717	0.0104282	0.27538	0.256692		0		0.150243	0.683087		0.00201357	0.00365691		0.0286731	0.00058492		0.117234	0.451775
Q53EU6|GPAT3_HUMAN Glycerol-3-phosphate acyltransferase 3 OS=Homo sapiens OX=9606 GN=GPAT3 PE=1 SV=2	Q53EU6	GPAT3		0	0.0810381	-0.00872105	0.409417	-0.0558332	0	-0.0406863	-0.0551233	-0.228347	0.0482037	0	0.275897	-0.00582767	-0.0557802	0.145415	0	0.182975	-0.184725	0.172325	0.138461		0		0.124806	0.683087		-0.0635992	0.187538		0.0744036	0.00058492		0.0690616	0.275793
P61513|RL37A_HUMAN 60S ribosomal protein L37a OS=Homo sapiens OX=9606 GN=RPL37A PE=1 SV=2	P61513	RPL37A		0	-1.71516	-0.195888	-0.462043	-0.136644	0	0	0	0	0	0	-0.762525	0.25571	-1.4599	0.285635	0	0	0	0	0		0		-0.619421	0.683087		0.0149555	0.0230448		-0.480485	0.00058492		0.0372476	0.0662153
Q01518|CAP1_HUMAN Adenylyl cyclase-associated protein 1 OS=Homo sapiens OX=9606 GN=CAP1 PE=1 SV=5	Q01518	CAP1		0	-0.0610599	0.102123	-0.14023	-0.0469705	0	0.570421	-0.0335155	0.085373	0.341884	0	-0.000750416	0.244642	0.0219949	-0.0256016	0	0.660816	0.0939867	0.878439	0.17881		0		0.292357	0.683087		0.101809	0.243011		0.211394	0.00058492		0.112031	0.265369
E5RGW4|E5RGW4_HUMAN Nucleophosmin (Fragment) OS=Homo sapiens OX=9606 GN=NPM1 PE=1 SV=1	E5RGW4	NPM1							0	0.300613	-0.0439756	-0.170038	-0.0446479						0	0.111193	-0.118242	0.142087	0.0831424		0		0.205903	0.683087		-0.081109	0.162951		-0.0139754	0.00058492		0.0192473	0.0302098
P31321|KAP1_HUMAN cAMP-dependent protein kinase type I-beta regulatory subunit OS=Homo sapiens OX=9606 GN=PRKAR1B PE=1 SV=4	P31321	PRKAR1B		0	0.859811	0.271613	0.522526	-0.280256	0	0	0	0	0	0	0.407382	-0.610278	0.264108	-0.548497	0	0	0	0	0		0		0.316798	0.683087		-0.0846663	0.0598951		0.196659	0.00058492		-0.207188	0.367452
Q9BQA1|MEP50_HUMAN Methylosome protein 50 OS=Homo sapiens OX=9606 GN=WDR77 PE=1 SV=1	Q9BQA1	WDR77		0	0.242301	-9.96e-05	0.0692489	0.0900978	0	-0.0382533	-0.0652687	-0.17507	0.0782683	0	0.055733	-0.0947848	0.0526098	-0.000613082	0	0.258077	-0.0426014	0.0806241	0.147278		0		0.129465	0.683087		-0.0506886	0.211717		0.00685322	0.00058492		0.0787578	0.424772
P51858|HDGF_HUMAN Hepatoma-derived growth factor OS=Homo sapiens OX=9606 GN=HDGF PE=1 SV=1	P51858	HDGF		0	-0.148336	-0.208458	-0.367568	-0.205787	0	-0.141029	-0.127484	-0.166006	-0.270595	0	0.00106776	-0.138521	0.0264941	0.0879891	0	-0.742539	-0.264303	-0.243572	-0.0984724		0		-0.257709	0.683087		-0.184691	0.901391		-0.187663	0.0594815		-0.121716	0.339249
P61970|NTF2_HUMAN Nuclear transport factor 2 OS=Homo sapiens OX=9606 GN=NUTF2 PE=1 SV=1	P61970	NUTF2		0	0.0431966	0.266893	-0.0875104	0.0829162	0	-0.036461	0.00213982	-0.151402	0.022929	0	0.255363	0.159676	0.0140229	-0.0810223	0	0.300056	0.0444334	0.146199	0.0511219		0		0.140539	0.683087		0.118286	0.249067		-0.0196727	0.00058492		0.0189862	0.0654928
P09110|THIK_HUMAN 3-ketoacyl-CoA thiolase;peroxisomal OS=Homo sapiens OX=9606 GN=ACAA1 PE=1 SV=2	P09110	ACAA1		0	0.0926931	-0.0109227	-0.116439	-0.0157881	0	-0.0407767	-0.147753	-0.293157	0.149423	0	0.157893	0.0485004	0.0338322	0.131817	0	0.255417	-0.0886273	0.176394	0.0920366		0		0.116307	0.683087		-0.0497006	0.141788		-0.0498424	0.00058492		0.0893723	0.432508
E9PGN7|E9PGN7_HUMAN Plasma protease C1 inhibitor OS=Homo sapiens OX=9606 GN=SERPING1 PE=1 SV=1	E9PGN7	SERPING1		0	0.165403	0.603402	0.19274	0.821425	0	0.675378	0.231519	0.367745	-0.189804	0	0.770111	0.91395	0.426438	0.457204	0	-0.212232	-0.192602	-0.335887	-0.553397		0		0.349665	0.683087		0.389067	0.24407		0.162759	0.00058492		0.133857	0.0704189
P17661|DESM_HUMAN Desmin OS=Homo sapiens OX=9606 GN=DES PE=1 SV=3	P17661	DES		0	0.020687	-0.155973	0.0502008	-0.121762	0	-0.23626	-0.14986	0.0401191	0.0856449	0	-0.163094	-0.235085	-0.0498387	-0.0805891	0	-0.0589047	0.0881822	0.0248904	0.0578087		0		-0.109393	0.683087		-0.113184	0.231848		0.0163429	0.00058492		-0.0147243	0.0345542
Q86UP2|KTN1_HUMAN Kinectin OS=Homo sapiens OX=9606 GN=KTN1 PE=1 SV=1	Q86UP2	KTN1		0	0.271113	0.296989	0.351251	0.486857	0	0.00524706	-0.0876566	-0.308636	0.104519	0	-0.00698877	-0.0474483	-0.0864847	0.0495698	0	0.475002	0.212701	0.399419	0.225127		0		0.186094	0.683087		0.0936463	0.141986		0.0888872	0.00058492		0.216518	0.513865
Q9H061|T126A_HUMAN Transmembrane protein 126A OS=Homo sapiens OX=9606 GN=TMEM126A PE=1 SV=1	Q9H061	TMEM126A		0	0.221746	0.106569	0.240599	0.14198	0	-0.00975551	0.1587	-0.136595	0.13635	0	0.162425	0.013164	0.0796494	0.133717	0	0.0468048	-0.124612	0.0366855	0.310921		0		0.105305	0.683087		0.0384551	0.0732048		0.0550849	0.00058492		0.180742	0.785447
Q13825|AUHM_HUMAN Methylglutaconyl-CoA hydratase;mitochondrial OS=Homo sapiens OX=9606 GN=AUH PE=1 SV=1	Q13825	AUH		0	0.202072	0.207872	0.205669	0.172787	0	0.680372	0.12107	0.172842	0.218231	0	-0.0336377	-0.0667003	-0.00076791	0.243838	0	0.113857	-0.329755	0.255292	-0.0760989		0		0.240666	0.683087		-0.0168783	0.019673		0.158259	0.0868876		0.139689	0.421615
Q13203|MYBPH_HUMAN Myosin-binding protein H OS=Homo sapiens OX=9606 GN=MYBPH PE=1 SV=4	Q13203	MYBPH		0	-0.00515023	0.0436906	-0.179677	-0.0494833	0	1.23203	-0.486507	0.113886	-0.266799	0	-0.0707469	0.120036	0.0909488	0.247313	0	0.719398	0.336452	0.286784	-0.102794		0		0.468883	0.683087		0.00341803	0.00174999		0.0779857	0.00058492		-0.0429409	0.0644422
P46063|RECQ1_HUMAN ATP-dependent DNA helicase Q1 OS=Homo sapiens OX=9606 GN=RECQL PE=1 SV=3	P46063	RECQL		0	-0.0814318	0.0937888	-0.183004	0.0595607	0					0	-0.184483	-0.122322	-0.0985021	-0.115946							0		-0.132958	0.683087		-0.0142665	0.0231889		-0.140753	0.00058492		-0.0281924	0.0563633
P49368|TCPG_HUMAN T-complex protein 1 subunit gamma OS=Homo sapiens OX=9606 GN=CCT3 PE=1 SV=4	P49368	CCT3		0	0.0419809	0.236569	0.158544	0.241246	0	0.0873428	-0.00568443	-0.0835117	0.124877	0	0.0352578	-0.0134652	0.0404902	0.0938088	0	0.32134	-0.00598962	0.124197	0.00234221		0		0.12148	0.683087		0.0528574	0.107438		0.0599298	0.00058492		0.115569	0.483382
Q96EY8|MMAB_HUMAN Cob(I)yrinic acid a;c-diamide adenosyltransferase;mitochondrial OS=Homo sapiens OX=9606 GN=MMAB PE=1 SV=1	Q96EY8	MMAB		0	0.331001	0.105503	0.286448	0.213349	0	-0.0908627	-0.04175	-0.226563	0.0199294	0	0.196458	0.0234109	0.0777953	0.0853463	0	0.152901	-0.0963221	0.195705	0.306629		0		0.147374	0.683087		-0.00228954	0.00449447		0.0833464	0.00058492		0.156313	0.53132
P34949|MPI_HUMAN Mannose-6-phosphate isomerase OS=Homo sapiens OX=9606 GN=MPI PE=1 SV=2	P34949	MPI		0	-0.043597	-0.285968	-0.14236	-0.154377	0	-0.0444558	-0.0135427	-0.236964	0.062182	0	-0.35408	-0.296796	-0.256136	-0.0838254	0	-0.0795741	0.264477	-0.484637	0.179046		0		-0.130427	0.683087		-0.0829574	0.0837745		-0.280024	0.225681		0.000756337	0.00161738
Q92620|PRP16_HUMAN Pre-mRNA-splicing factor ATP-dependent RNA helicase PRP16 OS=Homo sapiens OX=9606 GN=DHX38 PE=1 SV=2	Q92620	DHX38		0	-0.0333387	-0.778239	-0.508352	-0.654919	0					0	-0.790522	-0.959037	-0.394623	-0.751598							0		-0.41193	0.683087		-0.868638	1.46587		-0.451488	0.341961		-0.703258	1.01445
O75531|BAF_HUMAN Barrier-to-autointegration factor OS=Homo sapiens OX=9606 GN=BANF1 PE=1 SV=1	O75531	BANF1		0	-0.337828	-0.176343	-0.330971	-0.239761	0	0.0910371	-0.371052	-0.47314	-0.519159	0	-0.118914	-0.239772	-0.038052	-0.0595237	0	-0.858547	-0.123451	-0.0794322	-0.26206		0		-0.306063	0.683087		-0.227655	0.765742		-0.230399	0.0868876		-0.270126	0.671724
Q01469|FABP5_HUMAN Fatty acid-binding protein 5 OS=Homo sapiens OX=9606 GN=FABP5 PE=1 SV=3	Q01469	FABP5		0	-0.208764	-0.417425	-0.315864	-0.299692	0	-0.0732155	-0.188153	-0.18345	-0.0254638	0	-0.103285	-0.0998514	-0.099021	0.0731586	0	-1.14738	-0.465163	-0.509619	-0.16636		0		-0.383161	0.683087		-0.292648	0.568656		-0.276989	0.159453		-0.104589	0.27431
Q9NP72|RAB18_HUMAN Ras-related protein Rab-18 OS=Homo sapiens OX=9606 GN=RAB18 PE=1 SV=1	Q9NP72	RAB18		0	-0.030872	0.31597	0.00301462	0.0913345	0	0.0872915	0.0512897	-0.17724	0.155831	0	0.321409	0.349312	0.40548	0.331363	0	0.131026	0.0236283	0.104152	0.06493		0		0.127214	0.683087		0.18505	0.317074		0.0838516	0.00058492		0.160864	0.592586
Q86TD4|SRCA_HUMAN Sarcalumenin OS=Homo sapiens OX=9606 GN=SRL PE=2 SV=2	Q86TD4	SRL		0	-0.0995859	-0.186187	-0.140976	-0.0966676	0	0.0699717	-0.00534191	-0.422023	-0.0278523	0	-0.549213	-0.580809	-0.608896	-0.726377	0	-0.233045	-0.155556	-0.139952	-0.184922		0		-0.202968	0.683087		-0.231974	0.249679		-0.327962	0.159453		-0.258955	0.386172
I3L505|I3L505_HUMAN Acyl carrier protein (Fragment) OS=Homo sapiens OX=9606 GN=NDUFAB1 PE=1 SV=1	I3L505	NDUFAB1		0	0.230178	0.360419	0.210514	0.467012	0	0	0	0	0	0	0.326432	0.308061	0.175838	0.37818	0	0	0	0	0		0		0.139153	0.683087		0.16712	0.24524		0.0965879	0.00058492		0.211298	0.400797
P01766|HV313_HUMAN Immunoglobulin heavy variable 3-13 OS=Homo sapiens OX=9606 GN=IGHV3-13 PE=1 SV=2	P01766	IGHV3-13		0	0.0406849	0.0566033	-0.0761627	0.153249	0					0	0.450619	0.481357	0.313617	0.516995							0		0.245652	0.683087		0.26898	0.245136		0.118727	0.00058492		0.335122	0.541291
Q13496|MTM1_HUMAN Myotubularin OS=Homo sapiens OX=9606 GN=MTM1 PE=1 SV=2	Q13496	MTM1		0	0.0245404	0.03613	-0.121716	-0.083364	0	0.00357718	-0.0477486	-0.256875	0.0393364	0	0.164284	0.193071	0.120094	0.182829	0	0.232487	0.288854	0.100254	0.222781		0		0.106222	0.683087		0.117577	0.224712		-0.0395606	0.00058492		0.0903956	0.268203
O43615|TIM44_HUMAN Mitochondrial import inner membrane translocase subunit TIM44 OS=Homo sapiens OX=9606 GN=TIMM44 PE=1 SV=2	O43615	TIMM44		0	0.0723449	-0.149014	0.0441842	0.00491938	0	0.0183234	0.098415	-0.095453	0.091793	0	0.0932843	-0.0791691	0.0645222	0.104711	0	0.117307	-0.113407	0.176753	0.37962		0		0.0753148	0.683087		-0.0607935	0.148489		0.0475015	0.00058492		0.145261	0.400797
P52758|RIDA_HUMAN 2-iminobutanoate/2-iminopropanoate deaminase OS=Homo sapiens OX=9606 GN=RIDA PE=1 SV=1	P52758	RIDA		0	0.150396	0.0296415	0.126246	0.0498862	0	-0.0391482	0.0463194	-0.10555	0.214403	0	0.0840347	0.00775686	0.0974425	0.10419	0	0.270645	0.0264104	0.333192	0.210165		0		0.116482	0.683087		0.027532	0.125541		0.112833	0.00058492		0.144661	0.673108
O14949|QCR8_HUMAN Cytochrome b-c1 complex subunit 8 OS=Homo sapiens OX=9606 GN=UQCRQ PE=1 SV=4	O14949	UQCRQ		0	0.488475	0.234136	0.457123	0.215226	0	-0.0359085	0.189531	-0.00946641	0.276086	0	0.11224	-0.132502	0.169436	0.064054	0	0.138794	0.00297855	0.121582	0.297958		0		0.1759	0.683087		0.0735359	0.120409		0.184668	0.00904398		0.213331	0.817797
P25054|APC_HUMAN Adenomatous polyposis coli protein OS=Homo sapiens OX=9606 GN=APC PE=1 SV=2	P25054	APC		0	0.261281	-0.0900852	-0.432297	-0.399215	0	0	0	0	0	0	0.245566	0.247441	-0.660654	-0.0837161	0	0	0	0	0		0		0.126712	0.683087		0.039339	0.0664		-0.273238	0.00473085		-0.120733	0.278158
Q8IXI2|MIRO1_HUMAN Mitochondrial Rho GTPase 1 OS=Homo sapiens OX=9606 GN=RHOT1 PE=1 SV=2	Q8IXI2	RHOT1		0	-0.0485255	0.191158	-0.113167	-0.0376909	0	0.0253256	-0.027036	-0.290896	-0.0364814	0	0.328627	0.285006	0.137135	0.165398	0	0.501442	-0.235331	0.207973	0.0378979		0		0.201717	0.683087		0.0534492	0.0594093		-0.0147387	0.00058492		0.0322808	0.101722
P49427|UB2R1_HUMAN Ubiquitin-conjugating enzyme E2 R1 OS=Homo sapiens OX=9606 GN=CDC34 PE=1 SV=2	P49427	CDC34		0	0.172247	-0.0049463	0.0777332	0.197355	0	-0.0467795	-0.0160739	-0.237902	0.0775747	0	0.0864227	-0.174125	0.0576596	0.0189534	0	0.381863	0.110634	0.17499	0.120007		0		0.148438	0.683087		-0.021128	0.0425938		0.0181201	0.00058492		0.103473	0.503036
P16403|H12_HUMAN Histone H1.2 OS=Homo sapiens OX=9606 GN=HIST1H1C PE=1 SV=2	P16403	HIST1H1C		0	0.647678	1.12087	1.2391	2.0512	0	-1.52722	-0.404176	-0.563981	-0.444353	0	-0.567356	-0.62678	-0.39888	0.281385	0	-2.12047	-0.55082	-1.81206	-0.16981		0		-0.891842	0.683087		-0.115227	0.0375223		-0.383955	0.00058492		0.429605	0.156796
P62857|RS28_HUMAN 40S ribosomal protein S28 OS=Homo sapiens OX=9606 GN=RPS28 PE=1 SV=1	P62857	RPS28		0	0.078736	0.00201445	0.0619402	0.126883	0	-0.263263	-0.0765253	-0.278847	0.118322	0	-0.419986	-0.300571	-0.249062	-0.0892993	0	-0.0844827	0.264489	-0.0283977	0.348908		0		-0.172249	0.683087		-0.0276484	0.0302321		-0.123592	0.00058492		0.126203	0.310718
O00499|BIN1_HUMAN Myc box-dependent-interacting protein 1 OS=Homo sapiens OX=9606 GN=BIN1 PE=1 SV=1	O00499	BIN1		0	-0.09602	-0.00230996	-0.0248013	-0.150899	0	-0.14518	-0.10375	-0.102861	-0.0373375	0	-0.00773852	-0.0164865	0.0755065	0.0260264	0	-0.0711377	0.159433	-0.21543	0.160799		0		-0.080019	0.683087		0.00922146	0.0211049		-0.0668966	0.00058492		-0.000352723	0.00106472
P62805|H4_HUMAN Histone H4 OS=Homo sapiens OX=9606 GN=HIST1H4A PE=1 SV=2	P62805	HIST1H4A		0	-0.717996	0.334076	0.0299305	0.253793	0	-0.246992	-0.0896341	-0.051667	0.173053	0	-0.844456	0.0578664	-0.765799	0.0245548	0	0.28099	-0.343585	0.117213	0.0043205		0		-0.382114	0.683087		-0.0103189	0.00876354		-0.167581	0.00058492		0.11393	0.401049
O75822|EIF3J_HUMAN Eukaryotic translation initiation factor 3 subunit J OS=Homo sapiens OX=9606 GN=EIF3J PE=1 SV=2	O75822	EIF3J		0	0.0688306	0.0129759	-0.0599858	-0.0566268	0	-0.130906	0.0592728	0.154633	-0.397791	0	-0.217702	-0.11818	-0.0740562	0.0686996	0	-0.666388	-0.311437	-0.34305	-0.17477		0		-0.236541	0.683087		-0.0893421	0.152272		-0.0806148	0.00058492		-0.140122	0.317431
P62266|RS23_HUMAN 40S ribosomal protein S23 OS=Homo sapiens OX=9606 GN=RPS23 PE=1 SV=3	P62266	RPS23		0	0.0984058	-0.0109813	0.139956	-0.0193529	0	-0.309409	0.189847	-0.194825	0.356366	0	-0.197962	-0.378169	-0.202975	-0.0186589	0	-0.163193	0.177927	-0.503736	0.0993024		0		-0.143039	0.683087		-0.00534407	0.00427739		-0.190395	0.00058492		0.104414	0.257069
P55263|ADK_HUMAN Adenosine kinase OS=Homo sapiens OX=9606 GN=ADK PE=1 SV=2	P55263	ADK		0	-0.0990534	-0.0562615	-0.164939	-0.131336	0	-0.115137	-0.0203321	-0.169853	0.0134413	0	0.0147967	-0.0859166	-0.0683461	-0.00347114	0	-0.473406	-0.205274	-0.30637	0.128966		0		-0.1682	0.683087		-0.091946	0.249067		-0.177377	0.154106		0.00190005	0.00331137
H0Y2W2|H0Y2W2_HUMAN ATPase family AAA domain-containing protein 3A (Fragment) OS=Homo sapiens OX=9606 GN=ATAD3A PE=1 SV=1	H0Y2W2	ATAD3A		0	-0.0227753	-0.0328665	-0.0194541	0.0137597	0	0.0840254	0.0933154	-0.041265	0.202108	0	0.134289	0.0914508	0.0618485	0.217719	0	0.16599	0.0406892	0.181408	0.283786		0		0.0903823	0.683087		0.0481472	0.170983		0.0456344	0.00058492		0.179343	0.669215
Q32Q12|Q32Q12_HUMAN Nucleoside diphosphate kinase OS=Homo sapiens OX=9606 GN=NME1-NME2 PE=1 SV=1	Q32Q12	NME1-NME2		0	-0.0578078	0.0536763	0.135195	-0.174077	0	-0.0856046	0.140352	0.0842684	-0.0235807	0	-0.0635124	-0.0228806	-0.0439408	-0.3053	0	-0.569897	-0.659785	-0.336658	-0.238495		0		-0.194205	0.683087		-0.122159	0.086843		-0.0402839	0.00058492		-0.185363	0.671724
Q5T9B7|Q5T9B7_HUMAN Adenylate kinase isoenzyme 1 OS=Homo sapiens OX=9606 GN=AK1 PE=1 SV=1	Q5T9B7	AK1		0	-0.300505	-0.0273296	0.0851096	0.189254	0	-0.239766	0.108084	0.19987	-0.027822	0	-1.21908	-1.01698	-1.08396	-0.945381	0	0.0988768	0.396825	-0.347587	0.202401		0		-0.41512	0.683087		-0.13485	0.0590431		-0.286641	0.00058492		-0.145387	0.0957416
P13693|TCTP_HUMAN Translationally-controlled tumor protein OS=Homo sapiens OX=9606 GN=TPT1 PE=1 SV=1	P13693	TPT1		0	0.12252	0.0448591	0.236681	0.189593	0	-0.152187	0.0564694	-0.294872	-0.200487	0	-0.290494	-0.214472	-0.281931	-0.052535	0	-0.339918	0.126	-0.265946	0.051612		0		-0.165019	0.683087		0.00321426	0.00427739		-0.151517	0.00058492		-0.00295426	0.00331137
Q9Y2S2|CRYL1_HUMAN Lambda-crystallin homolog OS=Homo sapiens OX=9606 GN=CRYL1 PE=1 SV=3	Q9Y2S2	CRYL1		0	-0.142698	-0.0258796	-0.140141	0.0195781	0	0.5732	0.124806	0.208312	0.119974	0	0.0817474	0.236812	0.0482322	0.207581	0	0.554674	-0.32724	0.126254	-0.306173		0		0.266731	0.683087		0.0021245	0.00174999		0.0606642	0.00058492		0.0102401	0.0125432
Q9H1C7|CYTM1_HUMAN Cysteine-rich and transmembrane domain-containing protein 1 OS=Homo sapiens OX=9606 GN=CYSTM1 PE=1 SV=1	Q9H1C7	CYSTM1		0	0.0063283	-0.193333	-0.104659	-0.186241	0	0.715009	-0.111285	0.585599	0.078518	0	-0.0121136	-0.0958614	0.115202	0.0821575	0	0.314173	-0.153777	0.0850542	0.0738696		0		0.255849	0.683087		-0.138564	0.740723		0.170299	0.00058492		0.0120759	0.0215087
Q9BVM4|GGACT_HUMAN Gamma-glutamylaminecyclotransferase OS=Homo sapiens OX=9606 GN=GGACT PE=1 SV=2	Q9BVM4	GGACT		0	0.116449	0.164597	0.183159	0.636172	0	-0.0919655	-0.00578862	0.191731	0.161098	0	0.291864	0.202344	0.0900932	0.205787	0	0.255297	0.228807	0.113364	0.308848		0		0.142911	0.683087		0.14749	0.409241		0.144587	0.140493		0.327976	0.707884
Q8N183|NDUF2_HUMAN NADH dehydrogenase [ubiquinone] 1 alpha subcomplex assembly factor 2 OS=Homo sapiens OX=9606 GN=NDUFAF2 PE=1 SV=1	Q8N183	NDUFAF2		0	0.114035	-0.0995455	0.0204718	0.000969932	0	-0.0665758	-0.0322714	-0.233731	0.0978174	0	0.192862	-0.152373	0.0735916	0.117351	0	0.213198	-0.0879477	0.300584	0.291819		0		0.11338	0.683087		-0.0930345	0.394969		0.040229	0.00058492		0.126989	0.447289
P02511|CRYAB_HUMAN Alpha-crystallin B chain OS=Homo sapiens OX=9606 GN=CRYAB PE=1 SV=2	P02511	CRYAB		0	-0.0470297	0.987045	-0.318044	1.66045	0	-0.0164496	-0.0790092	-0.327094	-0.703808	0	0.522125	0.55239	0.0699909	0.823128	0	0.421677	0.497471	0.13796	0.601506		0		0.220081	0.683087		0.489474	0.388216		-0.109297	0.00058492		0.595319	0.282531
O43920|NDUS5_HUMAN NADH dehydrogenase [ubiquinone] iron-sulfur protein 5 OS=Homo sapiens OX=9606 GN=NDUFS5 PE=1 SV=3	O43920	NDUFS5		0	-0.334359	-0.582916	-0.502735	-0.539241	0	-0.0137667	0.154073	0.0181723	0.252711	0	-0.0421961	-0.289052	-0.287165	-0.135254	0	-1.15399	-0.375524	-0.987881	0.00320221		0		-0.386078	0.683087		-0.273355	0.24841		-0.439902	0.0868876		-0.104645	0.116435
Q7Z3C6|ATG9A_HUMAN Autophagy-related protein 9A OS=Homo sapiens OX=9606 GN=ATG9A PE=1 SV=3	Q7Z3C6	ATG9A		0	0.186055	0.833353	-0.0321027	0.256585	0	-0.151823	-0.109936	-0.271489	-0.0072575	0	0.796388	1.13063	0.395643	0.3439	0	0.332722	0.102157	0.117243	0.0758481		0		0.290836	0.683087		0.48905	0.24524		0.0523235	0.00058492		0.167269	0.473573
Q9BSE5|SPEB_HUMAN Agmatinase;mitochondrial OS=Homo sapiens OX=9606 GN=AGMAT PE=1 SV=2	Q9BSE5	AGMAT		0	-0.137404	-0.145436	-0.432479	-0.0542688	0	0.298077	0.19986	0.0184771	0.240566	0	0.154819	0.410503	0.284193	0.341915	0	0.414522	0.691815	-0.359276	0.669823		0		0.182504	0.683087		0.289185	0.24407		-0.122271	0.00058492		0.299509	0.484157
Q15811|ITSN1_HUMAN Intersectin-1 OS=Homo sapiens OX=9606 GN=ITSN1 PE=1 SV=3	Q15811	ITSN1		0	0.45221	0.197603	0.0553766	0.352783	0	0	0	0	0	0	0.224879	0.327218	0.212864	0.228767	0	0	0	0	0		0		0.169272	0.683087		0.131205	0.238742		0.06706	0.00058492		0.145387	0.373769
O14744|ANM5_HUMAN Protein arginine N-methyltransferase 5 OS=Homo sapiens OX=9606 GN=PRMT5 PE=1 SV=4	O14744	PRMT5		0	0.0901816	0.190068	0.0672966	0.0977708	0	-0.00519183	0.00914967	-0.160203	0.0763958	0	0.110241	0.11041	0.0583365	0.0259871	0	0.115388	0.0119111	0.0733545	0.0699018		0		0.0776545	0.683087		0.0803848	0.231848		0.00969617	0.00058492		0.0675139	0.447289
Q14498|RBM39_HUMAN RNA-binding protein 39 OS=Homo sapiens OX=9606 GN=RBM39 PE=1 SV=2	Q14498	RBM39		0	-0.474222	-0.542319	-0.988954	-0.987048	0					0	-0.0316853	0.0293983	0.0786329	0.0531493							0		-0.252953	0.683087		-0.25646	0.189126		-0.455161	0.00058492		-0.466949	0.292983
P52943|CRIP2_HUMAN Cysteine-rich protein 2 OS=Homo sapiens OX=9606 GN=CRIP2 PE=1 SV=1	P52943	CRIP2		0	0.235168	-0.118	-0.00720189	0.0289738	0	0	0	0	0	0	0.252426	-0.0820699	0.303477	0.0891206	0	0	0	0	0		0		0.121898	0.683087		-0.0500174	0.179902		0.0740688	0.00058492		0.0295236	0.152452
P13533|MYH6_HUMAN Myosin-6 OS=Homo sapiens OX=9606 GN=MYH6 PE=1 SV=5	P13533	MYH6		0	0.148677	-0.254126	-0.160386	-0.0674828	0	0.22814	-0.401629	-0.447573	-0.153415	0	-0.0830442	-0.0887143	-0.353195	-0.388379	0	0.766276	0.189121	0.208507	0.594694		0		0.265012	0.683087		-0.138837	0.165382		-0.188162	0.00058492		-0.00364569	0.00255429
Q92945|FUBP2_HUMAN Far upstream element-binding protein 2 OS=Homo sapiens OX=9606 GN=KHSRP PE=1 SV=4	Q92945	KHSRP		0	-0.0706402	-0.152718	-0.129224	-0.158733	0	0.373946	-0.289286	-0.129183	-0.105862	0	0.0246024	-0.0504361	0.156602	0.0861706	0	0.503158	0.110541	0.71263	0.0981665		0		0.207767	0.683087		-0.095475	0.165064		0.152706	0.00058492		-0.0200646	0.040967
P63010|AP2B1_HUMAN AP-2 complex subunit beta OS=Homo sapiens OX=9606 GN=AP2B1 PE=1 SV=1	P63010	AP2B1		0	0.037675	0.0438551	0.0474368	0.0929369	0	0.0153596	0.00108477	-0.260236	0.08772	0	0.102066	0.0429046	0.015793	0.0876141	0	0.291353	0.0453253	0.153235	0.0171689		0		0.111613	0.683087		0.0332924	0.151847		-0.0109426	0.00058492		0.07136	0.460375
A0A024R571|A0A024R571_HUMAN EH domain-containing protein 1 OS=Homo sapiens OX=9606 GN=EHD1 PE=1 SV=1	A0A024R571	EHD1		0	-0.0144703	-0.0121919	-0.0971674	-0.0855802	0	0.0349813	0.0410864	-0.139206	0.187217	0	0.164576	0.143788	0.152621	0.157412	0	0.263253	0.00951889	0.201154	0.105408		0		0.112085	0.683087		0.0455503	0.148548		0.0293505	0.00058492		0.0911142	0.306348
Q8N5G2|MACOI_HUMAN Macoilin OS=Homo sapiens OX=9606 GN=MACO1 PE=1 SV=1	Q8N5G2	MACO1		0	0.680765	0.652709	0.855245	0.452356	0					0	0.0234814	-0.122926	-0.536764	-0.269245							0		0.352123	0.683087		0.264892	0.147777		0.159241	0.00058492		0.0915557	0.0590051
P53985|MOT1_HUMAN Monocarboxylate transporter 1 OS=Homo sapiens OX=9606 GN=SLC16A1 PE=1 SV=3	P53985	SLC16A1		0	-0.112865	-0.10257	-0.212826	-0.149652	0	0.256365	0.0497236	-0.0182523	0.353922	0	0.172583	0.0211777	0.207606	0.146151	0	0.241681	-0.232353	0.122279	0.336975		0		0.139441	0.683087		-0.0660053	0.141504		0.0247015	0.00058492		0.171849	0.334608
K7EP68|K7EP68_HUMAN Tropomyosin alpha-4 chain (Fragment) OS=Homo sapiens OX=9606 GN=TPM4 PE=1 SV=1	K7EP68	TPM4		0	0.00191272	0.0510723	0.0405756	-0.041506	0	0.170398	0.0370824	-0.339755	0.0263287	0	0.0208991	-0.0632005	-0.0640445	-0.0678067	0	0.432437	0.169987	0.255032	-0.0535051		0		0.156412	0.683087		0.0487353	0.129267		-0.027048	0.00058492		-0.0341223	0.186473
O75431|MTX2_HUMAN Metaxin-2 OS=Homo sapiens OX=9606 GN=MTX2 PE=1 SV=1	O75431	MTX2		0	0.235619	0.00817508	0.251741	0.0697386	0	0.0156819	0.00615625	-0.227314	0.116267	0	0.0836804	-0.0833134	0.0949227	0.0483707	0	0.0502008	-0.0625486	0.0198917	0.146281		0		0.0962956	0.683087		-0.0328827	0.124989		0.0348106	0.00058492		0.0951642	0.596204
P29536|LMOD1_HUMAN Leiomodin-1 OS=Homo sapiens OX=9606 GN=LMOD1 PE=1 SV=3	P29536	LMOD1		0	0.50241	0.775999	0.884001	0.848579	0	0.33472	0.221265	-0.156706	0.105138	0	-0.223264	-0.3093	-0.305422	-0.121395	0	0.329174	-0.0410934	0.333029	0.211009		0		0.23576	0.683087		0.161718	0.0924955		0.188726	0.00058492		0.260833	0.292239
O75153|CLU_HUMAN Clustered mitochondria protein homolog OS=Homo sapiens OX=9606 GN=CLUH PE=1 SV=2	O75153	CLUH		0	-0.0148125	-0.0667553	-0.0719377	-0.101613	0	0.0689247	0.0510871	-0.180238	0.103345	0	0.134629	-0.053802	0.113943	0.154767	0	0.158713	-0.0428831	0.150485	0.0851174		0		0.0868634	0.683087		-0.0280883	0.0889918		0.00306305	0.00058492		0.0604041	0.204782
Q14019|COTL1_HUMAN Coactosin-like protein OS=Homo sapiens OX=9606 GN=COTL1 PE=1 SV=3	Q14019	COTL1		0	-0.210085	0.0623719	-0.377462	-0.0830254	0	0.952695	-0.516256	-0.194566	-0.0446525	0	0.0603436	0.521699	0.275909	0.137709	0	1.70826	-0.888961	1.88587	0.548361		0		0.627803	0.683087		-0.205287	0.086843		0.397439	0.00058492		0.139598	0.20767
Q8N4Q0|PTGR3_HUMAN Prostaglandin reductase 3 OS=Homo sapiens OX=9606 GN=ZADH2 PE=1 SV=1	Q8N4Q0	ZADH2		0	0.0887398	0.19071	0.0819211	0.112911	0	-0.0461555	0.0435511	-0.0933167	0.130773	0	0.385633	0.147319	0.234508	0.146121	0	0.158226	-0.171664	0.151773	0.352066		0		0.146611	0.683087		0.052479	0.0837745		0.0937216	0.00058492		0.185468	0.690801
E7EMB3|E7EMB3_HUMAN Calmodulin-2 OS=Homo sapiens OX=9606 GN=CALM2 PE=1 SV=1	E7EMB3	CALM2		0	0.0172936	0.0382253	0.0839702	0.0970333	0	-0.0754427	0.0920821	-0.231283	-0.0618247	0	-0.272847	-0.136069	-0.164508	-0.0549475	0	-0.108448	0.145526	0.149677	0.212982		0		-0.109861	0.683087		0.034941	0.0680386		-0.0405359	0.00058492		0.0483107	0.127889
Q99735|MGST2_HUMAN Microsomal glutathione S-transferase 2 OS=Homo sapiens OX=9606 GN=MGST2 PE=1 SV=1	Q99735	MGST2		0	0.0651427	0.0485871	0.161112	0.113378	0	-0.0464781	-0.10009	-0.228873	0.0541427	0	0.231421	0.142398	0.153994	0.216994	0	0.212549	-0.0119504	0.112771	0.0865654		0		0.115659	0.683087		0.0197361	0.0432402		0.0497511	0.00058492		0.11777	0.599603
Q58WW2|DCAF6_HUMAN DDB1- and CUL4-associated factor 6 OS=Homo sapiens OX=9606 GN=DCAF6 PE=1 SV=1	Q58WW2	DCAF6		0	0.0917149	-0.0379682	0.0190709	0.0901686	0	-0.0390999	-0.0235672	-0.0598582	0.179976	0	0.138819	-0.107341	0.132412	0.0532684	0	0.21747	0.106047	0.120694	0.319761		0		0.102226	0.683087		-0.0157074	0.0388385		0.0530795	0.00058492		0.160794	0.595605
Q9NRP2|COXM2_HUMAN COX assembly mitochondrial protein 2 homolog OS=Homo sapiens OX=9606 GN=CMC2 PE=1 SV=1	Q9NRP2	CMC2		0	0.0895489	0.154133	0.0782452	0.156952	0	0.027955	-0.00163843	-0.120749	0.076086	0	0.295707	0.0444329	0.252615	0.429439	0	0.0358438	-0.147595	0.0665802	0.274852		0		0.112264	0.683087		0.0123329	0.0235726		0.0691728	0.00058492		0.234332	0.679303
A0A087WZT3|A0A087WZT3_HUMAN BolA-like protein 2 OS=Homo sapiens OX=9606 GN=BOLA2 PE=1 SV=2	A0A087WZT3	BOLA2		0	0.243083	0.174459	0.141098	-0.0259612	0	0.262602	0.0885238	-0.124146	0.0315535	0	-0.158315	0.00717973	0.112471	0.142859	0	0.367163	-0.231208	0.503331	0.186979		0		0.178633	0.683087		0.00973856	0.0141848		0.158189	0.00058492		0.0838576	0.334608
J3QL71|J3QL71_HUMAN Secernin-2 OS=Homo sapiens OX=9606 GN=SCRN2 PE=1 SV=1	J3QL71	SCRN2		0	-0.0753516	-0.336937	-0.196315	-0.232306	0	-0.10439	-0.111475	-0.205078	0.0701119	0	-0.0395575	-0.251885	-0.0119988	0.0519988	0	-0.66394	0.0972597	-0.744381	-0.0523738		0		-0.22081	0.683087		-0.150759	0.235701		-0.289443	0.0292306		-0.0406423	0.0950002
O00159|MYO1C_HUMAN Unconventional myosin-Ic OS=Homo sapiens OX=9606 GN=MYO1C PE=1 SV=4	O00159	MYO1C		0	-0.0476209	0.161364	-0.0285439	0.0747006	0	0.04005	-0.0138475	-0.240104	0.0589502	0	0.242349	0.227169	0.175091	0.186837	0	0.30482	-0.0311404	0.295382	0.119989		0		0.1349	0.683087		0.085886	0.186742		0.0504564	0.00058492		0.110119	0.615122
O75955|FLOT1_HUMAN Flotillin-1 OS=Homo sapiens OX=9606 GN=FLOT1 PE=1 SV=3	O75955	FLOT1		0	-0.117428	0.19449	-0.191874	-0.022249	0	0.329527	0.0246396	-0.143536	-0.00147944	0	0.354614	0.48824	0.375073	0.306101	0	0.110815	-0.0995078	0.0158087	0.0336852		0		0.169382	0.683087		0.151965	0.181502		0.013868	0.00058492		0.0790145	0.207871
O75131|CPNE3_HUMAN Copine-3 OS=Homo sapiens OX=9606 GN=CPNE3 PE=1 SV=1	O75131	CPNE3		0	0.054851	0.0709418	-0.0301409	0.0105889	0	-0.0179599	-0.137054	-0.284553	0.00565705	0	0.132336	0.0507157	0.150079	0.115927	0	0.315851	0.142748	0.179705	0.133929		0		0.121269	0.683087		0.0318379	0.0643963		0.00377237	0.00058492		0.0665256	0.329989
Q9UQM7|KCC2A_HUMAN Calcium/calmodulin-dependent protein kinase type II subunit alpha OS=Homo sapiens OX=9606 GN=CAMK2A PE=1 SV=2	Q9UQM7	CAMK2A		0	0.225517	-0.169994	0.0428006	-0.081709	0	-0.122296	-0.0423938	-0.083921	0.359538	0	0.17545	0.132652	0.0137333	0.0516712	0	0.330512	0.442937	0.177086	0.540474		0		0.152296	0.683087		0.0908003	0.0870045		0.0374247	0.00058492		0.217493	0.35802
Q92616|GCN1_HUMAN eIF-2-alpha kinase activator GCN1 OS=Homo sapiens OX=9606 GN=GCN1 PE=1 SV=6	Q92616	GCN1		0	-0.0705601	0.151119	-0.111775	0.00406537	0	0.157669	0.00653068	-0.219874	0.0716272	0	0.122873	0.0722218	0.0245049	0.105716	0	0.263086	0.135539	0.13102	0.0209516		0		0.118267	0.683087		0.0913526	0.304101		-0.0440311	0.00058492		0.0505901	0.292239
Q92530|PSMF1_HUMAN Proteasome inhibitor PI31 subunit OS=Homo sapiens OX=9606 GN=PSMF1 PE=1 SV=2	Q92530	PSMF1		0	0.19284	0.345481	0.30999	0.241054	0	0	0	0	0	0	0.318325	0.201367	0.0603794	0.101488	0	0	0	0	0		0		0.127791	0.683087		0.136712	0.238742		0.0925923	0.00058492		0.0856356	0.303095
P51114|FXR1_HUMAN Fragile X mental retardation syndrome-related protein 1 OS=Homo sapiens OX=9606 GN=FXR1 PE=1 SV=3	P51114	FXR1		0	0.0355168	-0.0684817	-0.060941	-0.0473999	0	0.118056	-0.0193399	-0.110264	0.254865	0	0.011818	-0.0506094	0.000341728	0.0747267	0	0.168079	-0.0640571	0.141994	-0.211325		0		0.0833676	0.683087		-0.050622	0.231848		-0.00721735	0.00058492		0.0177168	0.0221742
P61981|1433G_HUMAN 14-3-3 protein gamma OS=Homo sapiens OX=9606 GN=YWHAG PE=1 SV=2	P61981	YWHAG		0	0.0955048	0.118996	0.221868	0.177518	0	-0.504258	-0.0800801	0.0788619	0.000489719	0	-0.152628	-0.362825	-0.0112326	-0.0340667	0	-0.178238	-0.40936	-0.427332	-0.0972834		0		-0.184905	0.683087		-0.183317	0.224712		-0.0344587	0.00058492		0.0116644	0.0223421
Q8NCN5|PDPR_HUMAN Pyruvate dehydrogenase phosphatase regulatory subunit;mitochondrial OS=Homo sapiens OX=9606 GN=PDPR PE=1 SV=2	Q8NCN5	PDPR		0	0.28051	-0.0531293	0.34405	0.252457	0	-0.0552397	-0.00788706	-0.152458	0.0838941	0	0.072254	-0.121022	0.245803	0.213602	0	0.187273	-0.0413742	0.138533	0.147399		0		0.121199	0.683087		-0.0558532	0.215561		0.143982	0.00058492		0.174338	0.817797
Q8N3L3|TXLNB_HUMAN Beta-taxilin OS=Homo sapiens OX=9606 GN=TXLNB PE=1 SV=3	Q8N3L3	TXLNB		0	-0.32467	-0.378011	-0.386308	-0.281309	0	-0.803866	-0.951074	-0.748932	-0.382729	0	-0.00416776	-0.197164	0.181238	0.257578	0	0.0212649	0.268645	-0.401741	0.861681		0		-0.27786	0.683087		-0.314401	0.196309		-0.338936	0.0187592		0.113805	0.066696
Q9NX20|RM16_HUMAN 39S ribosomal protein L16;mitochondrial OS=Homo sapiens OX=9606 GN=MRPL16 PE=1 SV=1	Q9NX20	MRPL16		0	-0.0238299	-0.129742	-0.170553	-0.186012	0	0.182998	0.0788305	-0.200762	0.144191	0	0.0933148	-0.0731464	0.110032	0.0715877	0	0.102366	-0.0404985	0.0449183	-0.0294636		0		0.0887122	0.683087		-0.0411391	0.105779		-0.0540912	0.00058492		7.58e-05	0.000220078
P35606|COPB2_HUMAN Coatomer subunit beta' OS=Homo sapiens OX=9606 GN=COPB2 PE=1 SV=2	P35606	COPB2		0	-0.0110571	-0.0907125	-0.0492312	-0.0339871	0	0.0862647	0.1084	-0.208642	-0.216438	0	0.0811905	-0.0123604	0.164608	0.124073	0	0.215117	0.116047	0.239439	0.156536		0		0.0928788	0.683087		0.0303435	0.06867		0.0365433	0.00058492		0.00754593	0.0121894
A0A1W2PNP0|A0A1W2PNP0_HUMAN GPI transamidase component PIG-T (Fragment) OS=Homo sapiens OX=9606 GN=PIGT PE=1 SV=1	A0A1W2PNP0	PIGT		0	-0.0530657	-0.0862732	0.0111292	0.017931	0	0.082584	-0.0438761	-0.231846	0.0967392	0	0.17433	0.222001	0.147415	0.266259	0	0.239647	0.0504661	-0.32394	0.268541		0		0.110874	0.683087		0.0355795	0.0645022		-0.0993108	0.00058492		0.162368	0.575382
Q03013|GSTM4_HUMAN Glutathione S-transferase Mu 4 OS=Homo sapiens OX=9606 GN=GSTM4 PE=1 SV=3	Q03013	GSTM4		0	-0.327376	-0.230506	-0.398401	-0.313753	0	-0.0939778	-0.283829	-0.408617	-0.223497	0	-0.00536676	-0.137028	0.0521976	-0.111579	0	-0.0537648	0.36788	0.147725	-0.0519673		0		-0.120121	0.683087		-0.0708707	0.0625707		-0.151774	0.00058492		-0.175199	0.646007
Q53FA3|Q53FA3_HUMAN HSPA1L (Fragment) OS=Homo sapiens OX=9606 GN=HSPA1L PE=1 SV=1	Q53FA3	HSPA1L		0	0.314773	0.0576139	0.266373	0.272826	0	0	0	0	0	0	0.193816	0.00182376	0.119759	0.724579	0	0	0	0	0		0		0.127147	0.683087		0.0148594	0.0571589		0.0965329	0.00058492		0.249351	0.34054
P33316|DUT_HUMAN Deoxyuridine 5'-triphosphate nucleotidohydrolase;mitochondrial OS=Homo sapiens OX=9606 GN=DUT PE=1 SV=4	P33316	DUT		0	0.444457	0.284666	0.401124	0.166273	0					0	0.0293558	-0.371596	0.279734	-0.0400012							0		0.236907	0.683087		-0.0434649	0.0253275		0.340429	0.20572		0.0631359	0.138786
P56381|ATP5E_HUMAN ATP synthase subunit epsilon;mitochondrial OS=Homo sapiens OX=9606 GN=ATP5F1E PE=1 SV=2	P56381	ATP5F1E		0	0.534769	0.0340523	0.748093	0.215843	0	0.00863514	0.0891648	0.0229004	0.198457	0	0.181634	-0.235573	0.254488	0.132799	0	0.0155766	0.0601666	-0.440056	0.365614		0		0.185154	0.683087		-0.0130473	0.0231889		0.146357	0.00058492		0.228178	0.900496
Q96HY6|DDRGK_HUMAN DDRGK domain-containing protein 1 OS=Homo sapiens OX=9606 GN=DDRGK1 PE=1 SV=2	Q96HY6	DDRGK1		0	0.0809637	-0.0213571	0.0548818	0.0725841	0	0.0735156	-0.054882	-0.277544	0.043339	0	-0.000769937	-0.184233	0.0673309	0.0971112	0	0.328805	0.206653	0.18813	0.273243		0		0.120629	0.683087		-0.0134548	0.0231889		0.00819951	0.00058492		0.121569	0.485056
B1AKJ5|B1AKJ5_HUMAN Nardilysin (N-arginine dibasic convertase);isoform CRA_d OS=Homo sapiens OX=9606 GN=NRDC PE=1 SV=1	B1AKJ5	NRDC		0	0.121364	0.324347	-0.0766224	0.0160704	0	0.00029907	0.131765	-0.0654596	0.25577	0	0.0505076	0.174647	0.106761	0.128171	0	0.439925	0.0707897	0.426647	0.153297		0		0.153024	0.683087		0.175387	0.497327		0.0978313	0.00058492		0.138327	0.587345
H7C2D0|H7C2D0_HUMAN Nebulin (Fragment) OS=Homo sapiens OX=9606 GN=NEB PE=1 SV=1	H7C2D0	NEB		0	0.0704721	0.188195	0.287788	0.22517	0	-0.902506	-0.0268231	-0.0173314	0.1784	0	-0.00347165	-0.054263	-0.136796	-0.157889	0	-2.43306	0.290385	0.0329586	0.376258		0		-0.817142	0.683087		0.0993736	0.172564		0.0416548	0.00058492		0.155485	0.31106
E5RJR5|E5RJR5_HUMAN S-phase kinase-associated protein 1 OS=Homo sapiens OX=9606 GN=SKP1 PE=1 SV=1	E5RJR5	SKP1		0	0.369042	0.386233	0.559547	0.49272	0	-0.0270022	-0.0423854	-0.150183	0.0451407	0	0.0379881	-0.0948833	-0.119895	-0.211829	0	0.174932	0.252212	0.363215	0.270409		0		0.13874	0.683087		0.125294	0.162951		0.163171	0.00058492		0.14911	0.21205
P21266|GSTM3_HUMAN Glutathione S-transferase Mu 3 OS=Homo sapiens OX=9606 GN=GSTM3 PE=1 SV=3	P21266	GSTM3		0	-0.0213372	-0.103226	-0.0335035	-0.0672052	0	-0.0958038	-0.0769602	-0.035867	-0.213039	0	-0.283783	-0.335405	-0.0435859	-0.0248194	0	-0.0292965	0.175179	-0.0366484	0.12015		0		-0.107555	0.683087		-0.0851032	0.109064		-0.0374012	0.00058492		-0.0462284	0.115352
Q96A26|F162A_HUMAN Protein FAM162A OS=Homo sapiens OX=9606 GN=FAM162A PE=1 SV=2	Q96A26	FAM162A		0	0.237232	0.0427958	0.0623802	0.0697385	0	-0.0514693	0.128084	-0.107712	0.0655341	0	0.0907456	-0.0754635	0.0412787	-0.020077	0	0.152351	-0.0867962	0.126905	-0.187047		0		0.107215	0.683087		0.00215513	0.00365691		0.0307128	0.00058492		-0.0179628	0.0382736
Q9Y2H6|FND3A_HUMAN Fibronectin type-III domain-containing protein 3A OS=Homo sapiens OX=9606 GN=FNDC3A PE=1 SV=4	Q9Y2H6	FNDC3A		0	0.802087	1.89548	2.07031	1.96953	0					0	0.012168	-0.142287	-0.124365	0.0390941							0		0.407128	0.683087		0.876594	0.187538		0.972972	0.00058492		1.00431	0.342685
Q8N142|PURA1_HUMAN Adenylosuccinate synthetase isozyme 1 OS=Homo sapiens OX=9606 GN=ADSSL1 PE=1 SV=1	Q8N142	ADSSL1		0	-0.269456	-0.107932	0.077461	-0.0865515	0	0.0735912	-0.0622725	-0.233343	0.0233574	0	-0.149546	-0.204394	-0.177012	-0.21274	0	-0.128966	-0.041393	-0.230321	-0.11778		0		-0.118594	0.683087		-0.103998	0.365993		-0.140804	0.00473085		-0.0984285	0.402074
P09871|C1S_HUMAN Complement C1s subcomponent OS=Homo sapiens OX=9606 GN=C1S PE=1 SV=1	P09871	C1S		0	-0.380714	0.293314	-0.304421	0.590541	0	0.566802	0.0972829	0.220456	-0.245141	0	0.634659	0.806588	0.713583	0.630765	0	0.554265	0.0883425	0.415038	-0.267353		0		0.343753	0.683087		0.321382	0.256378		0.261164	0.00058492		0.177203	0.140835
A0A096LPI6|A0A096LPI6_HUMAN Uncharacterized protein (Fragment) OS=Homo sapiens OX=9606 PE=4 SV=2	A0A096LPI6			0	0.163279	-0.00344486	0.0644724	-0.0799365	0	0.069623	0.109528	-0.575099	0.0230845	0	0.00650956	-0.0794681	-0.202423	-0.0405811	0	0.076843	-0.124264	-0.0402756	-0.236867		0		0.0790635	0.683087		-0.0244122	0.0556469		-0.188331	0.00058492		-0.0835751	0.302766
P99999|CYC_HUMAN Cytochrome c OS=Homo sapiens OX=9606 GN=CYCS PE=1 SV=2	P99999	CYCS		0	0.233087	0.136309	0.327793	-0.141258	0	-0.0724293	-0.233909	-0.690136	-0.175411	0	0.241154	0.0405757	-0.129775	0.0187739	0	0.0855127	-0.407361	-0.0361424	0.105287		0		0.121831	0.683087		-0.116096	0.137833		-0.132065	0.00058492		-0.0481524	0.126159
E9PNE6|E9PNE6_HUMAN Heat shock cognate 71 kDa protein OS=Homo sapiens OX=9606 GN=HSPA8 PE=1 SV=1	E9PNE6	HSPA8		0	0.0160901	0.0700916	-0.131927	0.226847	0	-0.320754	-0.0126722	0.317085	0.0487642	0	-0.189513	-0.162647	-0.0929656	0.123847	0	-0.0153151	-0.182486	0.00528943	0.0532333		0		-0.127373	0.683087		-0.0719282	0.163027		0.0243704	0.00058492		0.113173	0.519706
Q9Y5Y2|NUBP2_HUMAN Cytosolic Fe-S cluster assembly factor NUBP2 OS=Homo sapiens OX=9606 GN=NUBP2 PE=1 SV=1	Q9Y5Y2	NUBP2		0	0.185746	0.0119261	-0.111548	-0.187504	0	-0.0282269	0.157602	-0.0214716	0.166468	0	0.298458	0.171019	0.131439	0.129143	0	0.0305634	0.168081	-0.0308976	0.106089		0		0.121635	0.683087		0.127157	0.435741		-0.00811955	0.00058492		0.0535491	0.115799
P08590|MYL3_HUMAN Myosin light chain 3 OS=Homo sapiens OX=9606 GN=MYL3 PE=1 SV=3	P08590	MYL3		0	0.499131	0.507825	0.804832	0.391349	0	0.155568	-0.76361	-0.365523	-0.262381	0	-0.0908381	-0.157661	-0.348823	-0.268522	0	0.156686	-0.0306187	0.241896	-0.260386		0		0.180137	0.683087		-0.111016	0.0571589		0.0830954	0.00058492		-0.0999851	0.113548
P14735|IDE_HUMAN Insulin-degrading enzyme OS=Homo sapiens OX=9606 GN=IDE PE=1 SV=4	P14735	IDE		0	0.108387	0.020959	0.0272462	-0.00132856	0	-0.0528144	-0.00477631	-0.23721	0.09071	0	0.129652	-0.0171169	0.187657	0.191408	0	0.230263	0.0276768	0.0504755	0.00560711		0		0.103872	0.683087		0.00668564	0.0272		0.00704216	0.00058492		0.0715991	0.299172
O15260|SURF4_HUMAN Surfeit locus protein 4 OS=Homo sapiens OX=9606 GN=SURF4 PE=1 SV=3	O15260	SURF4		0	-0.0319243	0.153192	-0.00595706	0.0494874	0	-0.0071924	0.223842	-0.132452	0.189922	0	0.325193	0.454041	0.232592	0.188894	0	0.314024	0.189038	0.0420083	0.184998		0		0.150025	0.683087		0.255028	0.671496		0.0340478	0.00058492		0.153326	0.754773
Q8NBN7|RDH13_HUMAN Retinol dehydrogenase 13 OS=Homo sapiens OX=9606 GN=RDH13 PE=1 SV=2	Q8NBN7	RDH13		0	0.175483	0.250626	0.155761	0.123959	0	-0.104491	0.0896675	-0.089268	0.17527	0	0.247081	0.200646	0.196147	0.137039	0	0.187364	0.0166474	0.151281	0.22525		0		0.126359	0.683087		0.139397	0.388216		0.10348	0.00058492		0.16538	0.900496
Q9HC21|TPC_HUMAN Mitochondrial thiamine pyrophosphate carrier OS=Homo sapiens OX=9606 GN=SLC25A19 PE=1 SV=1	Q9HC21	SLC25A19		0	0.0875088	0.212391	-0.00979338	0.0311196	0	-0.0564296	0.0357485	-0.127593	0.169559	0	0.39931	0.417577	0.225352	0.198074	0	0.155865	-0.112868	0.1614	0.229463		0		0.146564	0.683087		0.138212	0.181689		0.0623416	0.00058492		0.157054	0.690801
Q15172|2A5A_HUMAN Serine/threonine-protein phosphatase 2A 56 kDa regulatory subunit alpha isoform OS=Homo sapiens OX=9606 GN=PPP2R5A PE=1 SV=1	Q15172	PPP2R5A		0	0.0867763	0.156181	-0.00224272	-0.0385045	0	-0.0613704	-0.0858066	-0.230795	0.03475	0	0.166693	0.131887	0.0946588	0.11375	0	0.28951	0.0289584	0.13142	0.0531841		0		0.120402	0.683087		0.057805	0.138753		-0.00173956	0.0001404		0.0407948	0.194063
I3NI02|I3NI02_HUMAN Golgi SNAP receptor complex member 2 OS=Homo sapiens OX=9606 GN=GOSR2 PE=4 SV=2	I3NI02	GOSR2		0	0.106955	0.0500785	0.114597	-0.00140518	0	0.320109	0.170593	0.0788982	0.281475	0	-0.121041	-0.108292	0.0105268	0.0529373	0	0.355247	-0.0103008	0.637049	0.267123		0		0.165318	0.683087		0.0255198	0.0537563		0.210268	0.00058492		0.150033	0.460375
Q9UJ70|NAGK_HUMAN N-acetyl-D-glucosamine kinase OS=Homo sapiens OX=9606 GN=NAGK PE=1 SV=4	Q9UJ70	NAGK		0	-0.0109393	0.0893032	-0.0553125	-0.0388931	0	0.0205501	-0.276679	-0.241601	0.00572492	0	0.194465	0.172028	0.121003	0.107229	0	0.539124	0.153711	0.426384	0.15736		0		0.1858	0.683087		0.034591	0.0425938		0.0626182	0.00058492		0.057855	0.232855
P11766|ADHX_HUMAN Alcohol dehydrogenase class-3 OS=Homo sapiens OX=9606 GN=ADH5 PE=1 SV=4	P11766	ADH5		0	-0.187616	-0.200947	-0.128252	-0.261227	0	-0.0732111	0.0456274	-0.248	-0.194544	0	-0.340098	-0.151684	0.108585	0.0523429	0	0.0627358	0.238053	0.0885667	0.245882		0		-0.134547	0.683087		-0.0172377	0.0231889		-0.044775	0.00058492		-0.0393864	0.0513422
Q9NRD1|FBX6_HUMAN F-box only protein 6 OS=Homo sapiens OX=9606 GN=FBXO6 PE=1 SV=1	Q9NRD1	FBXO6		0	0.0873229	-0.0793092	0.112005	-0.218731	0	0.304686	0.0710718	0.0897777	0.249199	0	-0.020361	-0.39386	-0.0150862	0.0516189	0	0.0849953	-0.128213	-0.171529	-0.0389376		0		0.114161	0.683087		-0.132578	0.204943		0.00379182	0.00058492		0.0107874	0.0148938
P25398|RS12_HUMAN 40S ribosomal protein S12 OS=Homo sapiens OX=9606 GN=RPS12 PE=1 SV=3	P25398	RPS12		0	0.00448956	-0.00391757	-0.0240226	-0.0026463	0	-0.130903	-0.0087756	-0.126799	0.144108	0	-0.0308814	-0.0861604	0.0626488	0.0230561	0	-0.24679	0.259515	0.201272	0.510989		0		-0.101021	0.683087		0.0401655	0.06599		0.0282748	0.00058492		0.168877	0.324331
A2A274|A2A274_HUMAN Aconitate hydratase;mitochondrial OS=Homo sapiens OX=9606 GN=ACO2 PE=1 SV=1	A2A274	ACO2		0	0.152043	0.105095	0.3598	0.123813	0	-0.0809729	0.118706	-0.0516647	0.115144	0	-0.610506	-0.563552	-0.690149	-0.668785	0	-0.448682	-0.154655	-0.627583	-0.120622		0		-0.24703	0.683087		-0.123601	0.106295		-0.252399	0.00058492		-0.137613	0.14769
Q9Y2K3|MYH15_HUMAN Myosin-15 OS=Homo sapiens OX=9606 GN=MYH15 PE=1 SV=5	Q9Y2K3	MYH15		0	0.0367936	0.214901	0.116078	0.220435	0	0.399363	0.0500837	-1.1866	0.0496646	0	-0.0596521	-0.175563	-0.108012	-0.05149	0	1.12083	-0.690332	0.195184	-0.227119		0		0.374335	0.683087		-0.150228	0.105316		-0.245837	0.00058492		-0.00212723	0.00255429
O14818|PSA7_HUMAN Proteasome subunit alpha type-7 OS=Homo sapiens OX=9606 GN=PSMA7 PE=1 SV=1	O14818	PSMA7		0	-0.0033955	-0.0358102	-0.117352	-0.122031	0	-0.0901595	-0.1149	0.238427	-0.41475	0	-0.18158	-0.178756	-0.246985	0.0476888	0	-0.969952	-0.143426	-0.173922	-0.0454022		0		-0.311272	0.683087		-0.118223	0.471202		-0.0749579	0.00058492		-0.133623	0.298987
Q08257|QOR_HUMAN Quinone oxidoreductase OS=Homo sapiens OX=9606 GN=CRYZ PE=1 SV=1	Q08257	CRYZ		0	0.0736747	-0.0973621	0.106024	0.0500459	0	-0.121135	-0.0786183	-0.166745	0.14367	0	-0.166822	-0.225772	-0.0951473	-0.000413399	0	-0.221127	-0.0450469	-0.177287	-0.0401217		0		-0.108852	0.683087		-0.1117	0.383873		-0.0832889	0.00058492		0.0382951	0.150858
H7C0L5|H7C0L5_HUMAN Inter-alpha-trypsin inhibitor heavy chain H4 (Fragment) OS=Homo sapiens OX=9606 GN=ITIH4 PE=1 SV=1	H7C0L5	ITIH4		0	-0.460892	-0.129518	-0.79446	-0.0892517	0	1.0603	0.702102	0.952622	0.439942	0	0.50132	1.04219	0.795527	0.895178	0	0.696497	0.420526	0.46315	0.434521		0		0.449306	0.683087		0.508826	0.324847		0.35421	0.00058492		0.420097	0.503036
O75475|PSIP1_HUMAN PC4 and SFRS1-interacting protein OS=Homo sapiens OX=9606 GN=PSIP1 PE=1 SV=1	O75475	PSIP1		0	-0.0630884	-0.287956	-0.220163	-0.265323	0					0	-0.192925	-0.0571822	-0.218847	-0.235777							0		-0.128006	0.683087		-0.172569	0.247598		-0.219505	0.111797		-0.25055	0.821064
L0R6Q1|S35U4_HUMAN SLC35A4 upstream open reading frame protein OS=Homo sapiens OX=9606 GN=SLC35A4 PE=3 SV=1	L0R6Q1	SLC35A4		0	0.317113	0.191272	0.236542	0.121865	0	0	0	0	0	0	0.17592	0.103247	0.0670888	0.133659	0	0	0	0	0		0		0.123258	0.683087		0.0736299	0.208546		0.0759076	0.00058492		0.0638811	0.301407
Q9H446|RWDD1_HUMAN RWD domain-containing protein 1 OS=Homo sapiens OX=9606 GN=RWDD1 PE=1 SV=1	Q9H446	RWDD1		0	-0.717628	-0.820142	-1.25355	-1.06985	0	-0.0330826	-0.0744303	-0.35861	0.508061	0	0.0725852	0.335593	0.317907	-0.325771	0	-0.328846	-1.10076	-0.618481	-0.195702		0		-0.251743	0.683087		-0.414936	0.197364		-0.478184	0.00058492		-0.270816	0.179647
I3L0A0|I3L0A0_HUMAN HCG2044781 OS=Homo sapiens OX=9606 GN=TMEM189-UBE2V1 PE=4 SV=1	I3L0A0	TMEM189-UBE2V1		0	0.0159026	0.0114756	-0.0812713	-0.0990701	0	-0.030862	0.162629	-0.121203	0.164446	0	0.21361	0.111581	0.222762	0.108751	0	0.370017	-0.0233876	0.230193	0.122702		0		0.142167	0.683087		0.0655744	0.191303		0.06262	0.00058492		0.0742072	0.252643
P31751|AKT2_HUMAN RAC-beta serine/threonine-protein kinase OS=Homo sapiens OX=9606 GN=AKT2 PE=1 SV=2	P31751	AKT2		0	-0.122693	-0.160071	-0.323491	-0.207	0	0.15136	0.102345	0.00398604	0.111017	0	0.247313	0.245126	0.125666	0.205782	0	0.298593	0.18041	0.280268	0.104412		0		0.143644	0.683087		0.0919524	0.148548		0.0216072	0.00058492		0.0535524	0.102807
Q86WA6|BPHL_HUMAN Valacyclovir hydrolase OS=Homo sapiens OX=9606 GN=BPHL PE=1 SV=1	Q86WA6	BPHL		0	0.162801	-0.122718	0.0941095	0.0994376	0	-0.0812311	-0.0696219	-0.269038	0.135648	0	0.121124	-0.0873824	0.180577	0.0406002	0	0.292872	0.0897682	0.198022	0.198093		0		0.123891	0.683087		-0.0474886	0.125326		0.0509177	0.00058492		0.118445	0.618577
Q02978|M2OM_HUMAN Mitochondrial 2-oxoglutarate/malate carrier protein OS=Homo sapiens OX=9606 GN=SLC25A11 PE=1 SV=3	Q02978	SLC25A11		0	0.229352	0.130842	0.300722	0.207123	0	0.16819	0.229801	-0.1674	0.134194	0	-0.0404261	-0.0620436	0.154853	0.0538775	0	0.0582704	-0.091984	0.1298	-0.0730145		0		0.103847	0.683087		0.051654	0.0837745		0.104494	0.00058492		0.0805448	0.270581
P60983|GMFB_HUMAN Glia maturation factor beta OS=Homo sapiens OX=9606 GN=GMFB PE=1 SV=2	P60983	GMFB		0	-0.00115738	0.0613027	0.0333633	0.0493898	0	0.0355085	-0.101237	-0.320552	-0.0731101	0	0.13538	0.160033	0.157982	0.15163	0	0.463371	0.00918872	0.149239	-0.0728263		0		0.158276	0.683087		0.0323219	0.06867		0.00500806	0.00058492		0.0137709	0.0302098
P27361|MK03_HUMAN Mitogen-activated protein kinase 3 OS=Homo sapiens OX=9606 GN=MAPK3 PE=1 SV=4	P27361	MAPK3		0	0.0254622	0.0527839	-0.104392	-0.0787953	0	0.00729362	-0.0752408	-0.0804467	0.0602159	0	0.117259	0.0153234	0.140978	0.194381	0	0.342069	0.308495	0.21022	0.183281		0		0.123021	0.683087		0.0753403	0.131699		0.04159	0.00058492		0.0897708	0.292983
Q9Y2I8|WDR37_HUMAN WD repeat-containing protein 37 OS=Homo sapiens OX=9606 GN=WDR37 PE=1 SV=2	Q9Y2I8	WDR37		0	0.082203	-0.13733	0.00877876	-0.0869396	0	-0.0607863	-0.00891447	-0.205306	-0.117501	0	0.160369	-0.042646	0.151381	0.142318	0	0.301822	-0.130745	0.534214	0.25786		0		0.120902	0.683087		-0.0799087	0.249067		0.122267	0.00058492		0.0489343	0.0895279
P15880|RS2_HUMAN 40S ribosomal protein S2 OS=Homo sapiens OX=9606 GN=RPS2 PE=1 SV=2	P15880	RPS2		0	-0.0197609	0.00428574	0.0802214	0.130376	0	-0.221131	-0.0743124	-0.359452	-0.401359	0	0.0103575	-0.118237	0.0886717	0.0883635	0	-0.709483	-0.118869	-0.427053	-0.0248764		0		-0.235004	0.683087		-0.0767831	0.249067		-0.154403	0.00058492		-0.0518741	0.0693129
P13994|CC130_HUMAN Coiled-coil domain-containing protein 130 OS=Homo sapiens OX=9606 GN=CCDC130 PE=1 SV=2	P13994	CCDC130		0	0.821641	0.789536	0.593598	0.731619	0					0	0.000856772	0.0198609	-1.02171	-0.447057							0		0.411249	0.683087		0.404698	0.224712		-0.214055	0.00058492		0.142281	0.0572926
P60174|TPIS_HUMAN Triosephosphate isomerase OS=Homo sapiens OX=9606 GN=TPI1 PE=1 SV=3	P60174	TPI1		0	-0.0133427	-0.0688777	-0.0141691	-0.11905	0	-0.706631	-0.463858	-0.482828	-0.58759	0	-1.86593	-1.82694	-1.83213	-2.01415	0	0.108969	0.0349517	0.0183452	0.222295		0		-0.619234	0.683087		-0.581181	0.211717		-0.577696	0.00058492		-0.624624	0.298744
J3KR44|J3KR44_HUMAN Ubiquitin thioesterase OS=Homo sapiens OX=9606 GN=OTUB1 PE=1 SV=2	J3KR44	OTUB1		0	0.0258233	-0.0223447	0.075793	-0.015736	0	-0.290258	-0.145596	-0.407741	-0.148006	0	0.0197552	-0.0421002	0.0806783	0.131545	0	-0.519151	-0.0195857	-0.393808	0.0744921		0		-0.190958	0.683087		-0.0574067	0.208546		-0.161269	0.00058492		0.0105738	0.0204861
Q8IYI6|EXOC8_HUMAN Exocyst complex component 8 OS=Homo sapiens OX=9606 GN=EXOC8 PE=1 SV=2	Q8IYI6	EXOC8		0	-0.337195	-0.0717272	-0.462095	-0.13455	0	0	0	0	0	0	-0.172016	-0.251542	-0.0892252	0.20667	0	0	0	0	0		0		-0.127303	0.683087		-0.0808174	0.186742		-0.13783	0.00058492		0.01803	0.0327933
P30613|KPYR_HUMAN Pyruvate kinase PKLR OS=Homo sapiens OX=9606 GN=PKLR PE=1 SV=2	P30613	PKLR		0	0.195065	-0.189994	0.122404	0.0398648	0	-0.142115	-0.314393	-0.649983	-0.0841544	0	0.289879	-0.0234925	0.249509	0.851108	0	0.251796	0.140914	0.27495	0.126439		0		0.148656	0.683087		-0.0967414	0.141788		-0.000779844	0.0001404		0.233314	0.252643
Q96IU4|ABHEB_HUMAN Protein ABHD14B OS=Homo sapiens OX=9606 GN=ABHD14B PE=1 SV=1	Q96IU4	ABHD14B		0	0.197896	0.00717265	0.0335164	-0.00495066	0	-0.049939	0.139259	-0.164786	0.096186	0	0.0471939	-0.029342	0.0583226	0.0456165	0	0.293488	0.00879449	0.226095	0.254373		0		0.12216	0.683087		0.0314711	0.0855426		0.0382871	0.00058492		0.0978062	0.358539
O60237|MYPT2_HUMAN Protein phosphatase 1 regulatory subunit 12B OS=Homo sapiens OX=9606 GN=PPP1R12B PE=1 SV=2	O60237	PPP1R12B		0	0.0728632	0.166998	0.0223914	0.184219	0	0.487355	-0.372225	-0.593341	-0.304103	0	-0.111794	-0.138761	-0.0553408	0.0827015	0	0.309529	0.040223	0.261928	0.31298		0		0.189488	0.683087		-0.0759412	0.0837745		-0.0910905	0.00058492		0.0689493	0.0890092
Q96HD1|CREL1_HUMAN Cysteine-rich with EGF-like domain protein 1 OS=Homo sapiens OX=9606 GN=CRELD1 PE=1 SV=3	Q96HD1	CRELD1		0	-0.0272949	0.036448	-0.0918613	-0.0805563	0	0.058725	0.0184715	-0.130737	0.181295	0	0.141886	-0.0647988	0.0843149	0.0401188	0	0.194314	0.132992	0.183053	0.0376538		0		0.0919076	0.683087		0.0307782	0.0824442		0.0111924	0.00058492		0.0446278	0.142677
Q8WXH0|SYNE2_HUMAN Nesprin-2 OS=Homo sapiens OX=9606 GN=SYNE2 PE=1 SV=3	Q8WXH0	SYNE2		0	0.201414	0.215594	0.194165	0.243862	0	0.0616821	-0.0774926	-0.193142	0.12983	0	-0.0619313	-0.0725192	-0.0891316	0.0922502	0	0.287072	0.117057	0.139343	0.2307		0		0.122059	0.683087		0.0456598	0.0787723		0.0128085	0.00058492		0.174161	0.817797
O75380|NDUS6_HUMAN NADH dehydrogenase [ubiquinone] iron-sulfur protein 6;mitochondrial OS=Homo sapiens OX=9606 GN=NDUFS6 PE=1 SV=1	O75380	NDUFS6		0	0.582937	0.150926	0.443938	0.236328	0	0.242929	0.0679929	-0.175611	0.148224	0	0.113293	-0.140484	0.116078	0.0875864	0	-0.110613	0.0409617	-0.0648211	0.273546		0		0.207136	0.683087		0.029849	0.0590431		0.0798959	0.00058492		0.186421	0.817797
Q9Y235|ABEC2_HUMAN C->U-editing enzyme APOBEC-2 OS=Homo sapiens OX=9606 GN=APOBEC2 PE=1 SV=1	Q9Y235	APOBEC2		0	0.108275	0.101974	0.0268297	0.0646039	0	-0.0400749	-0.121832	-0.0536398	-0.198216	0	0.0904697	0.142708	0.095956	0.2164	0	0.287325	-0.247747	0.84971	0.339606		0		0.111499	0.683087		-0.0312242	0.0427168		0.229714	0.00058492		0.105598	0.190007
P51608|MECP2_HUMAN Methyl-CpG-binding protein 2 OS=Homo sapiens OX=9606 GN=MECP2 PE=1 SV=1	P51608	MECP2		0	0.21002	0.21405	0.288334	0.231997	0	0.25268	-0.0632814	-0.398205	0.183901	0	-0.135984	-0.150089	-0.184883	-0.0958471	0	0.236421	0.0547969	0.0398265	-0.0224613		0		0.140784	0.683087		0.0138692	0.0231889		-0.0637319	0.00058492		0.0743974	0.18671
P61289|PSME3_HUMAN Proteasome activator complex subunit 3 OS=Homo sapiens OX=9606 GN=PSME3 PE=1 SV=1	P61289	PSME3		0	0.0641146	-0.0797215	-0.32557	-0.322319	0	-0.0515749	-0.241786	-0.230828	0.014407	0	0.225447	0.0482657	0.100362	0.0607183	0	0.185832	0.0136468	0.199077	0.087226		0		0.105955	0.683087		-0.0648988	0.137833		-0.0642396	0.00058492		-0.039992	0.066696
Q5XPI4|RN123_HUMAN E3 ubiquitin-protein ligase RNF123 OS=Homo sapiens OX=9606 GN=RNF123 PE=1 SV=1	Q5XPI4	RNF123		0	-0.00428433	0.0564892	-0.0630363	-0.165942	0	0.169419	0.0611775	-0.0505725	-0.171943	0	0.0460948	0.0894466	0.06937	0.115704	0	0.114972	0.0160644	0.124875	0.0627051		0		0.0815502	0.683087		0.0557944	0.243011		0.020159	0.00058492		-0.0398689	0.0849195
P27635|RL10_HUMAN 60S ribosomal protein L10 OS=Homo sapiens OX=9606 GN=RPL10 PE=1 SV=4	P27635	RPL10		0	0.00351942	-0.18849	-0.184146	-0.150348	0	0.109253	0.0369666	-0.198205	0.288615	0	0.0332877	-0.188132	-0.127011	0.00370724	0	0.365248	0.145622	0.523338	0.236777		0		0.127827	0.683087		-0.0485085	0.0722391		0.00349438	0.000152682		0.094688	0.190338
O43678|NDUA2_HUMAN NADH dehydrogenase [ubiquinone] 1 alpha subcomplex subunit 2 OS=Homo sapiens OX=9606 GN=NDUFA2 PE=1 SV=3	O43678	NDUFA2		0	0.392502	0.287491	0.303454	0.47909	0	0.163549	0.0136463	-0.423058	-0.123579	0	0.0371772	-0.326721	0.035003	0.00725497	0	-0.0301182	-0.00572587	0.041638	0.0342525		0		0.140778	0.683087		-0.00782747	0.00788115		-0.0107408	0.00058492		0.0992546	0.148877
Q9Y5M8|SRPRB_HUMAN Signal recognition particle receptor subunit beta OS=Homo sapiens OX=9606 GN=SRPRB PE=1 SV=3	Q9Y5M8	SRPRB		0	0.0151618	-0.0672011	-0.0330561	-0.0780268	0	0.0138934	-0.0972165	-0.188691	-0.00207612	0	0.114807	0.0300301	0.17737	0.153253	0	0.24037	0.0507015	0.156042	-0.122057		0		0.0960579	0.683087		-0.0209215	0.0590431		0.0279161	0.00058492		-0.0122266	0.0229324
P61254|RL26_HUMAN 60S ribosomal protein L26 OS=Homo sapiens OX=9606 GN=RPL26 PE=1 SV=1	P61254	RPL26		0	-0.0627167	-0.0547915	0.0326734	0.0286445	0					0	-0.18474	-0.416554	-0.134482	0.00099838							0		-0.123728	0.683087		-0.235673	0.24524		-0.0509044	0.00058492		0.0148215	0.0382736
Q15392|DHC24_HUMAN Delta(24)-sterol reductase OS=Homo sapiens OX=9606 GN=DHCR24 PE=1 SV=2	Q15392	DHCR24		0	0.0851658	0.0205391	0.0799055	-0.0160403	0					0	0.138843	-0.125961	0.219415	0.279552							0		0.112004	0.683087		-0.0527108	0.095714		0.14966	0.00058492		0.131756	0.25745
Q12955|ANK3_HUMAN Ankyrin-3 OS=Homo sapiens OX=9606 GN=ANK3 PE=1 SV=3	Q12955	ANK3		0	-0.245821	-0.0666012	-0.0705563	-0.172498	0	0	0	0	0	0	-0.174058	-0.110704	0.0548565	0.131967	0	0	0	0	0		0		-0.10497	0.683087		-0.0443262	0.16406		-0.00392496	0.00058492		-0.0101328	0.0191708
Q9H0R4|HDHD2_HUMAN Haloacid dehalogenase-like hydrolase domain-containing protein 2 OS=Homo sapiens OX=9606 GN=HDHD2 PE=1 SV=1	Q9H0R4	HDHD2		0	0.054188	-0.0350302	-0.112279	-0.0584681	0	0.298878	0.0102163	-0.664563	0.457355	0	-0.0930539	0.0051879	0.0873647	0.0550711	0	0.373771	0.289519	0.188871	0.0979479		0		0.158446	0.683087		0.0674733	0.124989		-0.125152	0.00058492		0.137976	0.274161
Q9Y281|COF2_HUMAN Cofilin-2 OS=Homo sapiens OX=9606 GN=CFL2 PE=1 SV=1	Q9Y281	CFL2		0	0.0348302	0.111447	-0.042153	0.0491573	0	-0.276244	-0.0995463	0.147285	-0.101344	0	-0.113753	-0.327113	-0.0632745	-0.17241	0	-0.0721236	-0.152312	-0.253993	-0.0642379		0		-0.106823	0.683087		-0.116881	0.191303		-0.0530338	0.00058492		-0.0722087	0.298475
P29966|MARCS_HUMAN Myristoylated alanine-rich C-kinase substrate OS=Homo sapiens OX=9606 GN=MARCKS PE=1 SV=4	P29966	MARCKS		0	-0.360516	-0.426333	-0.430704	-0.015464	0	0.159228	-0.0827398	-0.135516	0.0715335	0	-0.185418	-0.369182	-0.249057	-0.148991	0	-0.270798	0.207654	-0.0923188	0.144797		0		-0.164376	0.683087		-0.16765	0.174127		-0.226899	0.154402		0.012969	0.0234689
P20674|COX5A_HUMAN Cytochrome c oxidase subunit 5A;mitochondrial OS=Homo sapiens OX=9606 GN=COX5A PE=1 SV=2	P20674	COX5A		0	0.395779	-0.0924455	0.352783	-0.0148319	0	-0.0409979	-0.106001	-0.474932	-0.151838	0	0.201673	-0.267046	0.274534	-0.139328	0	0.024428	0.125592	0.399142	0.184003		0		0.145221	0.683087		-0.084975	0.150399		0.137882	0.00058492		-0.0304987	0.0588696
O75155|CAND2_HUMAN Cullin-associated NEDD8-dissociated protein 2 OS=Homo sapiens OX=9606 GN=CAND2 PE=1 SV=3	O75155	CAND2		0	0.177544	0.157924	0.134304	0.162798	0	-0.0653587	0.032346	-0.0359444	0.231258	0	0.111525	-0.00803834	-0.218687	0.0390151	0	0.167871	0.00621731	0.0590802	0.168931		0		0.0978953	0.683087		0.0471123	0.14666		-0.0153119	0.00058492		0.150501	0.696573
Q0VDG4|SCRN3_HUMAN Secernin-3 OS=Homo sapiens OX=9606 GN=SCRN3 PE=1 SV=1	Q0VDG4	SCRN3		0	0.0105951	-0.181313	-0.0457042	-0.119052	0	0.337681	0.0806804	-0.176031	0.138675	0	0.0187753	-0.133346	0.045288	0.115191	0	0.111129	0.0485709	0.0463663	0.258042		0		0.119545	0.683087		-0.0463517	0.0855426		-0.0325201	0.00058492		0.0982137	0.265369
Q15181|IPYR_HUMAN Inorganic pyrophosphatase OS=Homo sapiens OX=9606 GN=PPA1 PE=1 SV=2	Q15181	PPA1		0	0.0307517	0.0423371	0.0358432	0.120478	0	0.0356594	0.0403562	-0.198031	0.126964	0	0.0743094	-0.190095	0.0520426	0.0226135	0	0.41545	-0.0417248	0.201399	0.109647		0		0.139043	0.683087		-0.0372817	0.0811962		0.0228135	0.00058492		0.0949255	0.575453
P61158|ARP3_HUMAN Actin-related protein 3 OS=Homo sapiens OX=9606 GN=ACTR3 PE=1 SV=3	P61158	ACTR3		0	-0.0272636	-0.139846	0.00791903	-0.0660148	0	0.327188	-0.105031	-0.300278	-0.04525	0	-0.0252284	0.00713472	-0.306374	-0.209245	0	0.324281	0.128643	0.18716	-0.214215		0		0.149744	0.683087		-0.0272747	0.0556469		-0.102893	0.00058492		-0.133681	0.596204
Q6PK32|Q6PK32_HUMAN ANK1 protein OS=Homo sapiens OX=9606 GN=ANK1 PE=1 SV=1	Q6PK32	ANK1		0	0.0496395	-0.00311923	-0.0202177	0.100745	0	0.190398	-0.145371	-0.273244	0.0254609	0	-0.0203466	0.0209139	-0.0119274	0.0800323	0	0.131561	0.198836	0.155698	0.158255		0		0.0878131	0.683087		0.017815	0.0302321		-0.0374228	0.00058492		0.0911233	0.513865
P53618|COPB_HUMAN Coatomer subunit beta OS=Homo sapiens OX=9606 GN=COPB1 PE=1 SV=3	P53618	COPB1		0	-0.0702548	0.241396	-0.115953	0.0496344	0	0.0294228	-0.00201801	-0.326779	0.114348	0	0.28092	0.258503	0.174142	0.124111	0	0.348365	0.182677	0.287171	0.179372		0		0.147113	0.683087		0.170139	0.435741		0.0046452	0.00058492		0.116866	0.673108
Q9BXN1|ASPN_HUMAN Asporin OS=Homo sapiens OX=9606 GN=ASPN PE=1 SV=2	Q9BXN1	ASPN		0	-0.135072	-0.222901	-0.100432	0.0104067	0	0.167595	-0.229782	-0.373377	-0.417174	0	0.220628	0.110167	0.322623	0.305266	0	0.687028	0.096949	0.240818	0.185434		0		0.235045	0.683087		-0.0613918	0.0837745		0.0224078	0.00058492		0.0209833	0.0180564
P40925|MDHC_HUMAN Malate dehydrogenase;cytoplasmic OS=Homo sapiens OX=9606 GN=MDH1 PE=1 SV=4	P40925	MDH1		0	0.032736	-0.166645	0.0655657	-0.280527	0	-0.240008	0.187373	-0.116662	-0.0998306	0	-0.0164081	-0.281159	-0.24354	-0.0836347	0	-0.686215	-0.0779577	-0.470859	-0.150518		0		-0.227474	0.683087		-0.0845974	0.120409		-0.191374	0.00473085		-0.153628	0.673108
P07910|HNRPC_HUMAN Heterogeneous nuclear ribonucleoproteins C1/C2 OS=Homo sapiens OX=9606 GN=HNRNPC PE=1 SV=4	P07910	HNRNPC		0	-0.0247115	-0.0546659	-0.0909859	0.0334836	0	0.58466	-0.0152231	0.00997665	0.229483	0	-0.125368	-0.249679	-0.0334551	-0.135654	0	1.01105	0.199012	1.07939	0.533546		0		0.361407	0.683087		-0.030139	0.0418446		0.24123	0.00058492		0.165215	0.260421
Q9BV79|MECR_HUMAN Enoyl-[acyl-carrier-protein] reductase;mitochondrial OS=Homo sapiens OX=9606 GN=MECR PE=1 SV=2	Q9BV79	MECR		0	0.209277	0.131995	0.184684	0.492627	0	-0.0899422	-0.306851	-0.425486	0.0641895	0	0.0838144	-0.0657647	0.0232534	0.177533	0	0.433524	0.00277027	0.45748	0.401767		0		0.159168	0.683087		-0.0594626	0.0837745		0.0599828	0.00058492		0.284029	0.673108
Q15386|UBE3C_HUMAN Ubiquitin-protein ligase E3C OS=Homo sapiens OX=9606 GN=UBE3C PE=1 SV=3	Q15386	UBE3C		0	-0.0566829	0.0908827	-0.132061	-0.017789	0	0.0910206	0.10399	0.131443	0.346306	0	0.125569	0.139781	0.0631983	0.106482	0	0.319361	0.0740459	0.0104865	0.291109		0		0.119817	0.683087		0.102175	0.515643		0.0182665	0.00058492		0.181527	0.490586
R4GMX5|R4GMX5_HUMAN Basigin (Fragment) OS=Homo sapiens OX=9606 GN=BSG PE=1 SV=1	R4GMX5	BSG		0	-0.298283	-0.213536	-0.320242	-0.333072	0					0	-0.0309593	-0.152388	-0.0255815	-0.0176785							0		-0.164621	0.683087		-0.182962	0.476334		-0.172912	0.00058492		-0.175375	0.324331
P61106|RAB14_HUMAN Ras-related protein Rab-14 OS=Homo sapiens OX=9606 GN=RAB14 PE=1 SV=4	P61106	RAB14		0	-0.208092	-0.287363	-0.250486	-0.100216	0	0.0789259	-0.0908593	-0.37293	-0.161116	0	-0.238875	-0.0978986	0.0142304	0.0313241	0	-0.0886565	-0.122122	-0.0883493	-0.0753898		0		-0.114174	0.683087		-0.149561	0.471202		-0.174383	0.0214941		-0.0763494	0.347453
J3QKK1|J3QKK1_HUMAN Fructose-bisphosphate aldolase C (Fragment) OS=Homo sapiens OX=9606 GN=ALDOC PE=1 SV=1	J3QKK1	ALDOC		0	-0.021644	-0.0775572	-0.142385	-0.193076	0	0.117852	-0.11626	-0.188899	-0.0653222	0	0.0534026	-0.0825172	0.116296	0.139119	0	0.422815	-0.0648632	0.384309	0.0940608		0		0.143107	0.683087		-0.0852994	0.435741		0.0423304	0.00058492		-0.0063044	0.0104911
Q96SU4|OSBL9_HUMAN Oxysterol-binding protein-related protein 9 OS=Homo sapiens OX=9606 GN=OSBPL9 PE=1 SV=2	Q96SU4	OSBPL9		0	0.116439	-0.0150007	-0.0365611	-0.257869	0	-0.064811	-0.0604841	-0.42094	-0.0164355	0	0.117756	-0.111699	0.134225	0.0594277	0	0.272086	-0.130417	0.000671845	0.115663		0		0.110367	0.683087		-0.0794002	0.272146		-0.0806511	0.00058492		-0.0248034	0.0427635
P13473|LAMP2_HUMAN Lysosome-associated membrane glycoprotein 2 OS=Homo sapiens OX=9606 GN=LAMP2 PE=1 SV=2	P13473	LAMP2		0	0.129931	0.354171	0.0156817	0.108467	0	-0.122657	-0.150948	-0.259497	-0.116069	0	0.225796	0.365106	0.284359	0.219613	0	0.632568	0.291576	0.47016	0.505331		0		0.216409	0.683087		0.214976	0.248091		0.127676	0.00058492		0.179335	0.31761
C9J406|C9J406_HUMAN MICOS complex subunit MIC60 OS=Homo sapiens OX=9606 GN=IMMT PE=1 SV=1	C9J406	IMMT		0	-0.0329279	0.0111645	-0.121601	-0.201126	0	0.119018	-0.28765	-0.47589	0.0866468	0	0.0575975	-0.117998	0.00316276	0.191902	0	0.299306	-0.0681776	0.39052	0.0653427		0		0.110748	0.683087		-0.115665	0.24524		-0.050952	0.00058492		0.0356914	0.066696
P55039|DRG2_HUMAN Developmentally-regulated GTP-binding protein 2 OS=Homo sapiens OX=9606 GN=DRG2 PE=1 SV=1	P55039	DRG2		0	0.0661329	0.0313195	-0.0199264	0.0164311	0	-0.0294079	0.079695	-0.225396	0.157826	0	0.119622	0.0283903	0.0642063	0.0454737	0	0.187635	0.0893795	-0.0666778	0.050099		0		0.0859955	0.683087		0.0571961	0.24352		-0.0619485	0.00058492		0.0674574	0.351722
P84098|RL19_HUMAN 60S ribosomal protein L19 OS=Homo sapiens OX=9606 GN=RPL19 PE=1 SV=1	P84098	RPL19		0	-0.227587	-0.291297	-0.149693	-0.216585	0	0	0	0	0	0	-0.163121	-0.27057	-0.0453365	-0.0442629	0	0	0	0	0		0		-0.097677	0.683087		-0.140467	0.24352		-0.0487573	0.00058492		-0.065212	0.241539
P78527|PRKDC_HUMAN DNA-dependent protein kinase catalytic subunit OS=Homo sapiens OX=9606 GN=PRKDC PE=1 SV=3	P78527	PRKDC		0	-0.0883613	-0.113881	-0.208846	-0.0622018	0	0.496503	-0.110646	0.0915361	-0.0526882	0	-0.0464912	-0.0682604	0.0764367	0.0299902	0	0.688692	0.027797	0.496661	-0.114528		0		0.262586	0.683087		-0.0662476	0.227682		0.113947	0.00058492		-0.0498571	0.257891
P51148|RAB5C_HUMAN Ras-related protein Rab-5C OS=Homo sapiens OX=9606 GN=RAB5C PE=1 SV=2	P51148	RAB5C		0	-0.137087	0.188037	-0.213464	0.00218634	0	0.120094	-0.081796	-0.16544	0.0943485	0	0.269213	0.329569	0.189335	0.0256399	0	0.400064	0.0802367	0.192574	0.129514		0		0.163071	0.683087		0.129012	0.215561		0.000751267	0.0001404		0.0629223	0.333864
P02786|TFR1_HUMAN Transferrin receptor protein 1 OS=Homo sapiens OX=9606 GN=TFRC PE=1 SV=2	P02786	TFRC		0	0.115989	0.0355554	0.00148583	0.0550181	0	-0.0443725	-0.436145	-0.394135	-0.137857	0	0.150508	0.0052864	0.166238	0.141898	0	0.114159	-0.201789	-0.107311	-0.258938		0		0.0840706	0.683087		-0.149273	0.208546		-0.0834307	0.00058492		-0.0499695	0.0906645
A0A0A6YYG9|A0A0A6YYG9_HUMAN Protein ARPC4-TTLL3 OS=Homo sapiens OX=9606 GN=ARPC4-TTLL3 PE=4 SV=1	A0A0A6YYG9	ARPC4-TTLL3		0	-0.110985	-0.0558692	-0.254768	-0.0565807	0	0.217052	0.00950288	-0.212027	0.117373	0	0.112893	0.176095	0.197605	0.14222	0	0.363292	0.146403	0.365298	0.0638535		0		0.145563	0.683087		0.0690331	0.165966		0.0240273	0.00058492		0.0667164	0.278863
Q96LT9|RBM40_HUMAN RNA-binding protein 40 OS=Homo sapiens OX=9606 GN=RNPC3 PE=1 SV=1	Q96LT9	RNPC3		0	0.151992	0.044894	0.0619425	-0.0392573	0	0	0	0	0	0	0.356269	0.149775	0.498628	0.687593	0	0	0	0	0		0		0.127065	0.683087		0.0486671	0.156137		0.140143	0.00058492		0.162084	0.199384
P07237|PDIA1_HUMAN Protein disulfide-isomerase OS=Homo sapiens OX=9606 GN=P4HB PE=1 SV=3	P07237	P4HB		0	-0.195709	-0.286701	-0.295614	-0.201119	0	-0.0911811	-0.0798539	-0.284987	-0.569834	0	-0.14726	-0.457529	-0.160859	0.0391661	0	0.0563885	0.25014	0.00113913	0.0570027		0		-0.0944402	0.683087		-0.143486	0.141504		-0.18508	0.0952729		-0.168696	0.261544
Q86WW8|COA5_HUMAN Cytochrome c oxidase assembly factor 5 OS=Homo sapiens OX=9606 GN=COA5 PE=1 SV=1	Q86WW8	COA5		0	0.566042	0.542597	0.618092	0.401	0					0	0.000849865	-0.122914	-0.0766307	0.237693							0		0.283446	0.683087		0.209842	0.13622		0.270731	0.00058492		0.319347	0.785447
A0A0A0MT64|A0A0A0MT64_HUMAN NADPH:adrenodoxin oxidoreductase;mitochondrial OS=Homo sapiens OX=9606 GN=FDXR PE=1 SV=1	A0A0A0MT64	FDXR		0	0.01269	-0.208255	-0.219801	-0.129382	0	-0.0428712	-0.0364913	-0.188632	0.0593843	0	0.229882	0.0152437	0.0597527	0.256765	0	0.304776	0.0648769	0.237471	0.428719		0		0.126119	0.683087		-0.0411565	0.0837745		-0.0278023	0.00058492		0.153871	0.287799
Q92696|PGTA_HUMAN Geranylgeranyl transferase type-2 subunit alpha OS=Homo sapiens OX=9606 GN=RABGGTA PE=1 SV=2	Q92696	RABGGTA		0	-0.0188219	-0.159397	-0.0881375	-0.122907	0	0.265605	0.109104	-0.0251278	0.152601	0	-0.0263598	-0.181214	0.027085	0.0613552	0	0.346103	0.0352958	0.101022	0.0733774		0		0.141632	0.683087		-0.0490528	0.0837745		0.00371037	0.00058492		0.0411067	0.115877
Q7Z4H3|HDDC2_HUMAN HD domain-containing protein 2 OS=Homo sapiens OX=9606 GN=HDDC2 PE=1 SV=1	Q7Z4H3	HDDC2		0	-0.0878161	-0.286509	-0.250798	-0.1752	0	0.102375	0.046429	-0.0239131	0.0944581	0	0.176398	-0.135209	0.015521	0.0858819	0	0.327649	0.131891	0.0777306	-0.0107233		0		0.129651	0.683087		-0.0608494	0.0837745		-0.0453648	0.00058492		-0.00139593	0.00255429
E9PK54|E9PK54_HUMAN Heat shock cognate 71 kDa protein (Fragment) OS=Homo sapiens OX=9606 GN=HSPA8 PE=1 SV=8	E9PK54	HSPA8		0	0.0445717	0.179055	0.135846	0.144542	0	0.375339	-0.111297	-0.302849	-0.0945374	0	-0.0564618	-0.135951	-0.0609438	0.00227165	0	0.185047	-0.118121	0.10807	0.0118456		0		0.137124	0.683087		-0.0465784	0.0780421		-0.0299692	0.00058492		0.0160304	0.0403373
Q9H0P0|5NT3A_HUMAN Cytosolic 5'-nucleotidase 3A OS=Homo sapiens OX=9606 GN=NT5C3A PE=1 SV=3	Q9H0P0	NT5C3A		0	-0.0773828	-0.100857	-0.214673	-0.184493	0	-0.148742	-0.102104	-0.277082	-0.0689725	0	-0.0457799	0.327963	0.00854123	0.0376317	0	-1.1182	-0.437977	-0.365905	-0.310034		0		-0.347525	0.683087		-0.0782437	0.0659723		-0.21228	0.112029		-0.131467	0.386931
O75683|SURF6_HUMAN Surfeit locus protein 6 OS=Homo sapiens OX=9606 GN=SURF6 PE=1 SV=3	O75683	SURF6		0	0.273241	0.133913	0.431479	0.124708	0					0	0.0340905	-0.064749	-0.0443498	0.00897416							0		0.153666	0.683087		0.0345817	0.0556469		0.193564	0.00058492		0.0668411	0.208093
O14979|HNRDL_HUMAN Heterogeneous nuclear ribonucleoprotein D-like OS=Homo sapiens OX=9606 GN=HNRNPDL PE=1 SV=3	O14979	HNRNPDL		0	0.34089	0.167791	0.496969	0.362546	0	0.0290395	0.0575612	-0.0924237	0.19173	0	-0.102247	-0.469911	-0.227212	-0.125094	0	0.516397	0.0303027	0.590518	0.265949		0		0.19602	0.683087		-0.0535639	0.0508575		0.191963	0.00058492		0.173783	0.380254
P55060|XPO2_HUMAN Exportin-2 OS=Homo sapiens OX=9606 GN=CSE1L PE=1 SV=3	P55060	CSE1L		0	0.000609314	-0.12304	-0.114301	-0.134043	0	0.0571559	0.00619563	-0.299234	0.0406882	0	0.0700403	-0.0481422	0.0628719	0.0230518	0	0.2405	0.0917819	0.12149	0.0960268		0		0.0920764	0.683087		-0.0183012	0.0434145		-0.0572935	0.00058492		0.006431	0.0151991
A0A0G2JIW1|A0A0G2JIW1_HUMAN Heat shock 70 kDa protein 1B OS=Homo sapiens OX=9606 GN=HSPA1B PE=1 SV=1	A0A0G2JIW1	HSPA1B		0	0.219236	0.113973	0.239401	0.162893	0	0.0432851	0.141841	0.164547	0.134366	0	-0.0615209	-0.127869	-0.0930064	-0.0360649	0	0.276288	-0.192744	-0.0643383	0.0623113		0		0.119322	0.683087		-0.0161999	0.0235726		0.0616509	0.00058492		0.0808765	0.347259
O14841|OPLA_HUMAN 5-oxoprolinase OS=Homo sapiens OX=9606 GN=OPLAH PE=1 SV=3	O14841	OPLAH		0	0.0816611	-0.0218614	-0.0387507	-0.0518762	0	-0.0277558	0.0714471	-0.0280678	0.213864	0	0.12937	-0.0798801	0.0460689	0.15281	0	0.129921	0.0520671	0.0847415	0.285335		0		0.0782991	0.683087		0.00544319	0.0157176		0.015998	0.00058492		0.150033	0.460375
K7EK56|K7EK56_HUMAN UPF0449 protein C19orf25 OS=Homo sapiens OX=9606 GN=C19orf25 PE=1 SV=1	K7EK56	C19orf25		0	0.0358988	-0.0232127	0.0594161	-0.0175326	0	-0.053876	-0.00297334	-0.187741	0.115965	0	0.196752	-0.178029	0.110192	0.148899	0	0.367875	0.213112	0.213665	0.233952		0		0.136662	0.683087		0.0022243	0.00240167		0.0488831	0.00058492		0.120321	0.483382
Q53H82|LACB2_HUMAN Endoribonuclease LACTB2 OS=Homo sapiens OX=9606 GN=LACTB2 PE=1 SV=2	Q53H82	LACTB2		0	-0.0214325	-0.0416582	-0.179172	-0.0909625	0	-0.247103	-0.05382	-0.331901	-0.311827	0	0.0317254	-0.0416128	0.0130814	-0.00389835	0	-0.850392	0.16884	0.210762	0.187517		0		-0.2718	0.683087		0.00793725	0.0176436		-0.0718071	0.00058492		-0.0547927	0.0890092
Q12907|LMAN2_HUMAN Vesicular integral-membrane protein VIP36 OS=Homo sapiens OX=9606 GN=LMAN2 PE=1 SV=1	Q12907	LMAN2		0	0.0657687	0.203084	0.0360313	0.0582578	0					0	0.16353	0.241573	0.204398	0.124766							0		0.114649	0.683087		0.222328	0.60827		0.120215	0.00058492		0.0915121	0.341913
P62714|PP2AB_HUMAN Serine/threonine-protein phosphatase 2A catalytic subunit beta isoform OS=Homo sapiens OX=9606 GN=PPP2CB PE=1 SV=1	P62714	PPP2CB		0	-0.557162	-0.496661	-0.7872	-0.59702	0	-0.604951	-0.0576038	-0.40222	-0.23791	0	0.009578	-0.216016	-0.11729	-0.164375	0	0.130681	0.0977618	0.0378216	0.428247		0		-0.255464	0.683087		-0.16813	0.204077		-0.317222	0.0135242		-0.142764	0.13085
Q9UNM6|PSD13_HUMAN 26S proteasome non-ATPase regulatory subunit 13 OS=Homo sapiens OX=9606 GN=PSMD13 PE=1 SV=2	Q9UNM6	PSMD13		0	-0.0506361	-0.0486501	-0.02711	-0.0498894	0	-0.113128	-0.0833677	-0.294804	-0.60398	0	0.0258532	-0.0612913	0.0996139	0.102688	0	-0.311212	0.00549113	-0.102438	0.0204084		0		-0.112281	0.683087		-0.0469545	0.201294		-0.0811843	0.00058492		-0.132693	0.170803
P62273|RS29_HUMAN 40S ribosomal protein S29 OS=Homo sapiens OX=9606 GN=RPS29 PE=1 SV=2	P62273	RPS29		0	-0.0406844	0.277092	0.419959	0.477942	0	-0.463424	0.0126198	0.0844368	-1.44533	0	-0.0737886	-0.0922989	-0.0672081	0.116193	0	-2.53069	-0.66628	-0.543779	-0.313766		0		-0.777146	0.683087		-0.117217	0.0793822		-0.0266479	0.00058492		-0.291241	0.139624
Q6PI78|TMM65_HUMAN Transmembrane protein 65 OS=Homo sapiens OX=9606 GN=TMEM65 PE=1 SV=2	Q6PI78	TMEM65		0	0.156825	-0.0180021	0.253267	0.168164	0	0	0	0	0	0	0.234697	-0.0917063	0.112792	0.191313	0	0	0	0	0		0		0.0978807	0.683087		-0.0274271	0.095714		0.0915146	0.00058492		0.0898691	0.34569
Q969E4|TCAL3_HUMAN Transcription elongation factor A protein-like 3 OS=Homo sapiens OX=9606 GN=TCEAL3 PE=1 SV=1	Q969E4	TCEAL3		0	-0.158166	-0.354262	-0.280814	-0.498302	0	0	0	0	0	0	-0.224051	-0.500039	-0.163037	-0.0210895	0	0	0	0	0		0		-0.0955541	0.683087		-0.213575	0.24524		-0.110963	0.00058492		-0.129848	0.230246
Q9BVG4|PBDC1_HUMAN Protein PBDC1 OS=Homo sapiens OX=9606 GN=PBDC1 PE=1 SV=1	Q9BVG4	PBDC1		0	-0.00946793	-0.0607818	-0.0722398	-0.04606	0	0.103861	-0.0045382	-0.354624	0.0544995	0	0.058558	-0.0586298	0.122245	0.143357	0	0.554764	0.126129	0.75667	0.173301		0		0.176929	0.683087		0.000544754	0.00141267		0.113013	0.00058492		0.0812743	0.320813
P14672|GLUT4_HUMAN Solute carrier family 2;facilitated glucose transporter member 4 OS=Homo sapiens OX=9606 GN=SLC2A4 PE=1 SV=1	P14672	SLC2A4		0	0.0689086	0.0971214	0.0258775	0.036891	0	-0.0694967	-0.00446134	-0.246566	0.182944	0	0.223177	0.179429	0.15092	0.0995866	0	0.205954	0.0880922	0.130094	0.151532		0		0.107136	0.683087		0.0900454	0.249679		0.0150813	0.00058492		0.117738	0.618577
D6REB4|D6REB4_HUMAN Polyadenylate-binding protein-interacting protein 1 OS=Homo sapiens OX=9606 GN=PAIP1 PE=1 SV=1	D6REB4	PAIP1							0	0.0679266	-0.0354667	0.0534856	0.154312						0	0.470017	0.0850135	0.28067	0.419243		0		0.268972	0.683087		0.0247734	0.0395208		0.167078	0.00058492		0.286777	0.460375
O00299|CLIC1_HUMAN Chloride intracellular channel protein 1 OS=Homo sapiens OX=9606 GN=CLIC1 PE=1 SV=4	O00299	CLIC1		0	-0.176815	-0.160828	-0.313476	-0.46063	0	0.230968	-0.201554	-0.314706	-0.0651514	0	0.207369	0.193166	0.260151	-0.203276	0	0.481764	0.141525	0.369317	0.127545		0		0.185822	0.683087		-0.00692264	0.00788115		0.000321642	3.56394e-06		-0.150378	0.270599
O95861|BPNT1_HUMAN 3'(2');5'-bisphosphate nucleotidase 1 OS=Homo sapiens OX=9606 GN=BPNT1 PE=1 SV=1	O95861	BPNT1		0	0.00402423	-0.158031	-0.0732012	0.0665359	0	0.051468	0.156718	0.000478759	0.380373	0	0.0923035	-0.0533341	0.0713551	0.11251	0	0.132273	0.0421242	-0.0245326	0.176489		0		0.0700172	0.683087		-0.0031306	0.00449447		-0.00647498	0.00058492		0.183977	0.597864
P02760|AMBP_HUMAN Protein AMBP OS=Homo sapiens OX=9606 GN=AMBP PE=1 SV=1	P02760	AMBP		0	-0.122306	0.239897	-0.11393	0.367672	0	0.995801	0.261674	0.272388	-0.262424	0	0.311588	0.406262	0.150491	0.153094	0	0.0849547	0.0236265	0.336707	-0.304453		0		0.31751	0.683087		0.232865	0.482559		0.161414	0.00058492		-0.0115275	0.00885696
Q9UNZ2|NSF1C_HUMAN NSFL1 cofactor p47 OS=Homo sapiens OX=9606 GN=NSFL1C PE=1 SV=2	Q9UNZ2	NSFL1C		0	-0.0962754	-0.138924	-0.168532	-0.093545	0	-0.156745	-0.0405937	-0.0945002	-0.196611	0	0.0779082	-0.054895	0.132849	0.0695953	0	-0.262702	-0.0520729	0.0333855	0.0724673		0		-0.109454	0.683087		-0.0716215	0.249679		-0.0241994	0.00058492		-0.0370233	0.0889513
Q04917|1433F_HUMAN 14-3-3 protein eta OS=Homo sapiens OX=9606 GN=YWHAH PE=1 SV=4	Q04917	YWHAH		0	-0.0496077	0.0190543	0.000660039	0.0209055	0	-0.0476778	-0.129953	-0.345756	-0.0488555	0	-0.0179224	-0.0798249	0.084654	0.014063	0	-0.318915	-0.108882	-0.599584	-0.0906264		0		-0.108531	0.683087		-0.0749015	0.24524		-0.215007	0.00058492		-0.0261284	0.115877
B0QYF7|B0QYF7_HUMAN Myoglobin (Fragment) OS=Homo sapiens OX=9606 GN=MB PE=1 SV=1	B0QYF7	MB		0	-0.146739	-0.534545	-0.444467	-0.586281	0	0	0	0	0	0	-0.445852	-0.92978	-0.423286	-0.358783	0	0	0	0	0		0		-0.148148	0.683087		-0.366081	0.24352		-0.216938	0.00473085		-0.236266	0.386931
O95782|AP2A1_HUMAN AP-2 complex subunit alpha-1 OS=Homo sapiens OX=9606 GN=AP2A1 PE=1 SV=3	O95782	AP2A1		0	0.189754	-0.0448275	0.137073	-0.0126118	0	-0.0558233	-0.109172	-0.198566	0.0819652	0	0.0361059	-0.0543257	-0.00845667	-0.087465	0	0.314655	0.00976154	0.224078	0.0734181		0		0.121173	0.683087		-0.0496409	0.196309		0.038532	0.00058492		0.0138266	0.0391033
D6RBR1|D6RBR1_HUMAN Calpastatin (Fragment) OS=Homo sapiens OX=9606 GN=CAST PE=1 SV=1	D6RBR1	CAST		0	-0.605798	-0.70098	-1.00308	-0.692033	0	-0.419829	-0.183123	-0.309158	0.0382987	0	-0.339612	-0.452833	-0.00246601	-0.0156711	0	0.310038	0.297438	-0.0575924	0.0980803		0		-0.2638	0.683087		-0.259875	0.18733		-0.343075	0.00058492		-0.142831	0.155736
E9PCN2|E9PCN2_HUMAN Guanylate cyclase soluble subunit beta-1 OS=Homo sapiens OX=9606 GN=GUCY1B1 PE=1 SV=1	E9PCN2	GUCY1B1		0	0.176878	-0.0418531	-0.00303685	-0.052596	0	-0.169159	-0.249177	-0.392582	-0.375728	0	0.237008	0.0365871	0.258818	0.356717	0	0.516561	-0.0479886	0.254616	0.281449		0		0.190322	0.683087		-0.0756079	0.169934		0.0294536	0.00058492		0.0524607	0.0476455
Q8NC56|LEMD2_HUMAN LEM domain-containing protein 2 OS=Homo sapiens OX=9606 GN=LEMD2 PE=1 SV=1	Q8NC56	LEMD2		0	0.0662452	0.0172888	-0.0536987	0.0753517	0	0.183833	-0.0832317	-0.257841	0.0545014	0	-0.0661029	-0.0498967	-0.0833546	-0.0530798	0	0.238491	-0.0477145	0.0447008	-0.0191684		0		0.105617	0.683087		-0.0408886	0.165382		-0.0875485	0.00058492		0.0144012	0.0501457
Q9BRA2|TXD17_HUMAN Thioredoxin domain-containing protein 17 OS=Homo sapiens OX=9606 GN=TXNDC17 PE=1 SV=1	Q9BRA2	TXNDC17		0	0.153143	0.000871727	-0.0634596	-0.0995563	0	-0.11315	-0.178287	-0.375128	0.0348167	0	0.153074	-0.220737	0.216882	0.344793	0	0.384694	0.150531	0.259944	0.232682		0		0.144441	0.683087		-0.0619055	0.089871		0.00955971	0.00058492		0.128184	0.287093
O75208|COQ9_HUMAN Ubiquinone biosynthesis protein COQ9;mitochondrial OS=Homo sapiens OX=9606 GN=COQ9 PE=1 SV=1	O75208	COQ9		0	0.252565	0.145699	0.520327	0.247783	0	0.0272331	0.351458	-0.0570633	-0.315358	0	-0.024088	-0.156731	-0.0449645	-0.0845607	0	0.140916	-0.0424906	0.160144	0.0839489		0		0.0991566	0.683087		0.0744838	0.0855426		0.144611	0.00058492		-0.0170469	0.0188592
K7EK77|K7EK77_HUMAN ATP synthase subunit alpha;mitochondrial (Fragment) OS=Homo sapiens OX=9606 GN=ATP5F1A PE=1 SV=1	K7EK77	ATP5F1A		0	0.348186	0.136116	0.531161	-0.579542	0	-0.0230455	-0.0345527	-0.231914	0.00501922	0	0.272053	0.165504	0.173776	0.544342	0	-0.0333844	-0.593879	-1.18245	0.541497		0		0.140952	0.683087		-0.0817032	0.0606958		-0.177357	0.00058492		0.127829	0.0820377
Q9Y5P6|GMPPB_HUMAN Mannose-1-phosphate guanyltransferase beta OS=Homo sapiens OX=9606 GN=GMPPB PE=1 SV=2	Q9Y5P6	GMPPB		0	-0.0202837	-0.132004	-0.148877	-0.0563368	0	0.0623348	-0.025404	-0.121834	0.0576352	0	0.0865824	-0.0575317	0.154945	0.150882	0	0.388725	0.117034	0.276744	0.0533355		0		0.12934	0.683087		-0.0244763	0.0556469		0.0402444	0.00058492		0.0513791	0.208093
Q9C0C2|TB182_HUMAN 182 kDa tankyrase-1-binding protein OS=Homo sapiens OX=9606 GN=TNKS1BP1 PE=1 SV=4	Q9C0C2	TNKS1BP1		0	0.290306	1.88941	0.261753	0.694982	0	0	0	0	0	0	1.26867	1.6905	0.805897	0.275456	0	0	0	0	0		0		0.389743	0.683087		0.894975	0.24841		0.266912	0.00058492		0.242609	0.344648
Q13049|TRI32_HUMAN E3 ubiquitin-protein ligase TRIM32 OS=Homo sapiens OX=9606 GN=TRIM32 PE=1 SV=2	Q13049	TRIM32		0	0.0409823	0.159198	-0.0586525	-0.134113	0					0	0.220397	0.285595	0.237211	0.317533							0		0.13069	0.683087		0.222397	0.483493		0.0892792	0.00058492		0.09171	0.101722
P16333|NCK1_HUMAN Cytoplasmic protein NCK1 OS=Homo sapiens OX=9606 GN=NCK1 PE=1 SV=1	P16333	NCK1		0	0.0402349	-0.11692	-0.145811	-0.103739	0	0.00511004	-0.12878	-0.207092	-0.20713	0	0.0776483	-0.0614598	0.135133	0.0599126	0	0.403727	0.0611546	0.328357	0.093342		0		0.13168	0.683087		-0.0615011	0.178639		0.0276467	0.00058492		-0.0394036	0.0890092
A0A0A0MTJ9|A0A0A0MTJ9_HUMAN Neutral cholesterol ester hydrolase 1 OS=Homo sapiens OX=9606 GN=NCEH1 PE=1 SV=1	A0A0A0MTJ9	NCEH1		0	-0.00413496	-0.0683647	-0.117603	-0.11476	0	-0.00555943	-0.203868	-0.145219	0.176142	0	0.225927	-0.0115786	0.186527	0.0153951	0	0.171183	0.0435028	0.136475	0.167627		0		0.0968539	0.683087		-0.0600771	0.148548		0.0150452	0.00058492		0.0611013	0.166968
A0A1C7CYX3|A0A1C7CYX3_HUMAN Cytosolic carboxypeptidase 4 OS=Homo sapiens OX=9606 GN=AGBL1 PE=1 SV=1	A0A1C7CYX3	AGBL1		0	-0.0798607	-0.13832	-0.213905	-0.228649	0	0.17282	-0.0242038	-0.0273579	-0.220792	0	0.0752922	-0.010209	0.0892515	0.0317121	0	0.489927	-0.457244	0.154117	-0.257796		0		0.164544	0.683087		-0.157494	0.2286		0.000526384	0.0001404		-0.168881	0.556522
P63000|RAC1_HUMAN Ras-related C3 botulinum toxin substrate 1 OS=Homo sapiens OX=9606 GN=RAC1 PE=1 SV=1	P63000	RAC1		0	-0.0323143	-0.0374607	-0.0371902	-0.0341392	0	0.220486	-0.0884607	-0.0492613	-0.0664742	0	-0.0131701	0.085588	-0.184128	-0.100245	0	0.413442	0.0198877	0.123352	0.193363		0		0.147111	0.683087		-0.00511142	0.0140708		-0.0368069	0.00058492		-0.00187386	0.00255429
P11047|LAMC1_HUMAN Laminin subunit gamma-1 OS=Homo sapiens OX=9606 GN=LAMC1 PE=1 SV=3	P11047	LAMC1		0	-0.0287635	0.109329	0.0685207	0.129765	0	-0.00465639	0.1663	-0.0721513	0.134254	0	-0.0964043	-0.120709	0.0286451	0.045322	0	-0.183377	-0.182587	-0.0461982	0.222423		0		-0.0783002	0.683087		-0.00691685	0.00964376		-0.00529592	0.00058492		0.132941	0.671724
Q14654|KCJ11_HUMAN ATP-sensitive inward rectifier potassium channel 11 OS=Homo sapiens OX=9606 GN=KCNJ11 PE=1 SV=2	Q14654	KCNJ11		0	0.0406018	0.153416	-0.0458598	0.0747727	0					0	0.217799	0.238011	0.167191	0.219063							0		0.1292	0.683087		0.195714	0.482559		0.0606656	0.00058492		0.146918	0.441456
O00161|SNP23_HUMAN Synaptosomal-associated protein 23 OS=Homo sapiens OX=9606 GN=SNAP23 PE=1 SV=1	O00161	SNAP23		0	-0.083419	-0.273198	-0.381401	-0.489864	0	0.198927	-0.24674	0.169134	0.0798894	0	0.168858	0.00108284	0.247862	0.320458	0	0.115959	-0.123204	0.112651	0.372283		0		0.100081	0.683087		-0.160515	0.390605		0.0370614	0.00058492		0.0706917	0.0573858
P15090|FABP4_HUMAN Fatty acid-binding protein;adipocyte OS=Homo sapiens OX=9606 GN=FABP4 PE=1 SV=3	P15090	FABP4		0	-0.183805	-0.493796	-0.183159	0.0826923	0	0.0409552	0.235412	-0.245584	-0.151585	0	-0.056959	-0.377488	0.156654	-0.093784	0	-0.148827	0.0515945	-0.0322656	-0.00978787		0		-0.0871589	0.683087		-0.14607	0.124989		-0.0760886	0.00058492		-0.0431161	0.142677
Q9NVH1|DJC11_HUMAN DnaJ homolog subfamily C member 11 OS=Homo sapiens OX=9606 GN=DNAJC11 PE=1 SV=2	Q9NVH1	DNAJC11		0	0.0488534	-0.0169221	-0.0666398	-0.00913755	0	0.0766754	0.0825947	-0.11418	0.21153	0	0.0276215	-0.087356	-0.00194609	0.0676003	0	0.0960934	-0.0435673	0.0288801	0.249562		0		0.0623109	0.683087		-0.0163127	0.0445897		-0.0384715	0.00058492		0.129889	0.460375
P14866|HNRPL_HUMAN Heterogeneous nuclear ribonucleoprotein L OS=Homo sapiens OX=9606 GN=HNRNPL PE=1 SV=2	P14866	HNRNPL		0	-0.0642025	-0.0800724	-0.021683	-0.0134963	0	0.94965	-0.00629274	0.165568	0.107302	0	-0.224015	-0.253314	0.0184775	-0.047954	0	1.0066	-0.448117	1.4017	-0.0336937		0		0.417009	0.683087		-0.196949	0.265178		0.391015	0.00058492		0.0030396	0.00797457
Q14558|KPRA_HUMAN Phosphoribosyl pyrophosphate synthase-associated protein 1 OS=Homo sapiens OX=9606 GN=PRPSAP1 PE=1 SV=2	Q14558	PRPSAP1		0	-0.048316	0.043634	-0.148603	-0.074823	0	0.124787	-0.0946469	0.00837953	0.0666591	0	0.0672559	0.139334	-0.0470447	0.0394479	0	0.247885	0.0789978	0.102536	0.0296691		0		0.0979029	0.683087		0.0418298	0.095714		-0.0211831	0.00058492		0.0152383	0.0547106
P55010|IF5_HUMAN Eukaryotic translation initiation factor 5 OS=Homo sapiens OX=9606 GN=EIF5 PE=1 SV=2	P55010	EIF5		0	-0.096569	-0.0759203	-0.197472	-0.123271	0	-0.148303	0.0104138	-0.49701	-0.182506	0	0.0366861	0.114872	0.0957904	0.110355	0	-0.956132	-0.0597697	-0.502746	-0.225769		0		-0.291079	0.683087		-0.00260112	0.00572646		-0.275359	0.040084		-0.105298	0.301407
Q03252|LMNB2_HUMAN Lamin-B2 OS=Homo sapiens OX=9606 GN=LMNB2 PE=1 SV=4	Q03252	LMNB2		0	0.155779	0.0719288	0.23075	0.286504	0	0.297445	-0.0753874	-0.147458	0.0932227	0	-0.130678	-0.188189	-0.0487718	0.0359388	0	0.198851	-0.0288667	0.238399	0.0198654		0		0.130349	0.683087		-0.0551287	0.13622		0.0682296	0.00058492		0.108883	0.377072
P61960|UFM1_HUMAN Ubiquitin-fold modifier 1 OS=Homo sapiens OX=9606 GN=UFM1 PE=1 SV=1	P61960	UFM1		0	-0.0290231	-0.0328453	-0.0470465	0.00800634	0	0.0504439	0.0219797	-0.077687	0.156431	0	0.104398	0.0478734	0.175038	0.162891	0	0.347551	0.0441737	0.173707	0.105041		0		0.118342	0.683087		0.0202954	0.073021		0.056003	0.00058492		0.108092	0.541291
Q7L3B6|CD37L_HUMAN Hsp90 co-chaperone Cdc37-like 1 OS=Homo sapiens OX=9606 GN=CDC37L1 PE=1 SV=1	Q7L3B6	CDC37L1		0	-0.161311	-0.47352	-0.409633	-0.526286	0					0	-0.0597909	-0.337026	0.0345004	0.0040553							0		-0.110551	0.683087		-0.405273	0.92217		-0.187566	0.00058492		-0.261116	0.309933
F5GWE5|F5GWE5_HUMAN Phosphatidylinositol transfer protein alpha isoform OS=Homo sapiens OX=9606 GN=PITPNA PE=1 SV=1	F5GWE5	PITPNA		0	-0.0938906	0.345235	-0.0898449	0.0208907	0	-0.0100811	0.0454424	-0.105547	0.165762	0	0.414088	0.488596	0.369221	0.142875	0	0.409844	0.527075	0.333191	0.142262		0		0.17999	0.683087		0.351587	0.568656		0.126755	0.00058492		0.117947	0.618577
Q8IW45|NNRD_HUMAN ATP-dependent (S)-NAD(P)H-hydrate dehydratase OS=Homo sapiens OX=9606 GN=NAXD PE=1 SV=1	Q8IW45	NAXD		0	0.111666	0.19355	0.0573376	0.0757454	0	0.243991	0.0384301	0.0326204	0.098904	0	0.171126	0.0734237	0.114649	0.0502628	0	-0.0937188	0.0981479	-0.0928345	0.280692		0		0.108266	0.683087		0.100888	0.381479		0.0279431	0.00058492		0.126401	0.499447
P41236|IPP2_HUMAN Protein phosphatase inhibitor 2 OS=Homo sapiens OX=9606 GN=PPP1R2 PE=1 SV=2	P41236	PPP1R2		0	-0.104433	-0.189665	-0.181382	-0.0323973	0	-0.229004	-0.000301987	-0.239898	-0.16615	0	0.0606272	-0.105248	0.061959	0.0798801	0	-1.34098	-0.319792	-0.577589	-0.163761		0		-0.403447	0.683087		-0.153752	0.332184		-0.234228	0.0100396		-0.0706072	0.235837
Q16762|THTR_HUMAN Thiosulfate sulfurtransferase OS=Homo sapiens OX=9606 GN=TST PE=1 SV=4	Q16762	TST		0	0.294564	-0.00774423	0.272498	0.147146	0	-0.0805141	-0.0934754	-0.184844	-0.0418586	0	0.148422	-0.216585	-0.100452	-0.137334	0	0.0934117	-0.0681224	-0.0399713	0.173671		0		0.113971	0.683087		-0.0964816	0.249067		-0.0131925	0.00058492		0.0354059	0.0704189
P00167|CYB5_HUMAN Cytochrome b5 OS=Homo sapiens OX=9606 GN=CYB5A PE=1 SV=2	P00167	CYB5A		0	-0.0116895	-0.057549	0.0238198	0.127678	0	0.141403	-0.0367847	-0.0882377	0.0539429	0	0.00343854	-0.0489384	0.213014	0.115573	0	0.349096	-0.0458204	0.295671	0.0339903		0		0.120562	0.683087		-0.0472731	0.231848		0.111067	0.00058492		0.0827962	0.502366
E7EMK3|E7EMK3_HUMAN Flotillin-2 OS=Homo sapiens OX=9606 GN=FLOT2 PE=1 SV=1	E7EMK3	FLOT2		0	-0.227267	-0.00201731	-0.35065	-0.0749968	0	0.306267	0.171594	-0.209987	0.0438259	0	0.253368	0.302228	0.269027	0.120559	0	0.427026	-0.0697597	0.20119	-0.058851		0		0.189848	0.683087		0.100511	0.172788		-0.0226051	0.00058492		0.0076344	0.0184942
Q86TP1|PRUN1_HUMAN Exopolyphosphatase PRUNE1 OS=Homo sapiens OX=9606 GN=PRUNE1 PE=1 SV=2	Q86TP1	PRUNE1		0	0.034386	-0.0472462	-0.0574546	-0.134335	0	-0.0356442	0.0938985	-0.158072	0.189364	0	0.136036	-0.0169624	0.166088	0.156005	0	0.296521	0.202582	0.229925	0.225597		0		0.107825	0.683087		0.058068	0.137066		0.0451217	0.00058492		0.109158	0.287799
D6R9V8|D6R9V8_HUMAN Protein CDV3 homolog OS=Homo sapiens OX=9606 GN=CDV3 PE=1 SV=1	D6R9V8	CDV3							0	0.0612361	0.0403093	0.0455571	0.437224						0	0.389498	-0.305296	0.0736069	0.438727		0		0.225367	0.683087		-0.132494	0.113722		0.059582	0.00058492		0.437975	0.900496
A0A1B0GTN0|A0A1B0GTN0_HUMAN Voltage-dependent L-type calcium channel subunit alpha OS=Homo sapiens OX=9606 GN=CACNA1D PE=3 SV=1	A0A1B0GTN0	CACNA1D							0	0.0605769	-0.245897	0.0752081	0.260675						0	0.393992	0.665486	0.308948	0.169829		0		0.227285	0.683087		0.209794	0.069797		0.192078	0.00058492		0.215252	0.5455
Q5JR12|PPM1J_HUMAN Protein phosphatase 1J OS=Homo sapiens OX=9606 GN=PPM1J PE=1 SV=1	Q5JR12	PPM1J		0	0.0505393	0.0439955	0.0780659	-0.0502033	0	0.00939959	-0.362576	-0.514364	-0.234134	0	0.050865	-0.0996131	0.0697619	0.231471	0	0.351004	0.300134	0.224558	0.164165		0		0.115452	0.683087		-0.029515	0.0284107		-0.0354945	0.00058492		0.0278244	0.0370167
C9JRL4|C9JRL4_HUMAN Malate dehydrogenase;cytoplasmic (Fragment) OS=Homo sapiens OX=9606 GN=MDH1 PE=1 SV=8	C9JRL4	MDH1		0	0.245025	0.163653	-0.0846955	-0.393777	0	0	0	0	0	0	0.13602	-0.144927	0.0269922	0.0217683	0	0	0	0	0		0		0.0952614	0.683087		0.00468154	0.00794901		-0.0144258	0.00058492		-0.0930023	0.190338
Q9BTY7|HGH1_HUMAN Protein HGH1 homolog OS=Homo sapiens OX=9606 GN=HGH1 PE=1 SV=1	Q9BTY7	HGH1		0	-0.0829608	-0.0221699	0.0115481	-0.284951	0	0.659491	0.253838	0.0978989	-0.0999486	0	-0.00035943	-0.0419083	0.21124	0.355467	0	0.299037	-0.319569	-0.188884	-0.513592		0		0.218802	0.683087		-0.0324522	0.0356802		0.0329508	0.00058492		-0.135756	0.147135
Q6ZU65|UBN2_HUMAN Ubinuclein-2 OS=Homo sapiens OX=9606 GN=UBN2 PE=1 SV=2	Q6ZU65	UBN2		0	0.106802	0.211935	0.311376	0.364729	0	-0.0104665	-0.780872	-0.456391	-0.094309	0	-0.482506	-0.287104	0.0187085	0.0185065	0	-1.72357	-0.469827	-0.238802	-0.131127		0		-0.527435	0.683087		-0.331467	0.243011		-0.0912771	0.00058492		0.03945	0.0547106
P21810|PGS1_HUMAN Biglycan OS=Homo sapiens OX=9606 GN=BGN PE=1 SV=2	P21810	BGN		0	0.136946	-0.0567745	0.116242	0.0918741	0	0.142196	0.18594	-0.115301	0.296093	0	-0.109912	-0.0926777	-0.0504405	-0.0358101	0	0.432102	0.161827	0.350289	0.169894		0		0.150333	0.683087		0.0495787	0.0837745		0.0751974	0.00058492		0.130513	0.409934
Q96AC1|FERM2_HUMAN Fermitin family homolog 2 OS=Homo sapiens OX=9606 GN=FERMT2 PE=1 SV=1	Q96AC1	FERMT2		0	-0.0398132	-0.0696259	-0.0697552	0.0402613	0	0.0737132	-0.0612889	-0.254678	0.0341773	0	0.0895818	-0.0507616	0.067484	-0.0157482	0	0.326863	0.0886975	0.120628	0.163473		0		0.112586	0.683087		-0.0232447	0.0645022		-0.0340804	0.00058492		0.0555409	0.252643
Q8TCA0|LRC20_HUMAN Leucine-rich repeat-containing protein 20 OS=Homo sapiens OX=9606 GN=LRRC20 PE=1 SV=1	Q8TCA0	LRRC20		0	-0.209418	0.207276	-0.0484669	0.0441991	0	-0.0565964	0.10509	-0.163347	-0.192773	0	0.0934716	0.402303	0.0633022	0.355428	0	-0.46331	0.162468	-0.808699	0.0245978		0		-0.158963	0.683087		0.219284	0.568656		-0.239303	0.00058492		0.0578629	0.0866254
P42167|LAP2B_HUMAN Lamina-associated polypeptide 2;isoforms beta/gamma OS=Homo sapiens OX=9606 GN=TMPO PE=1 SV=2	P42167	TMPO		0	-0.0865105	-0.0570059	-0.309911	-0.0911769	0					0	-0.115282	-0.261327	-0.08235	-0.285643							0		-0.100896	0.683087		-0.159167	0.247598		-0.196131	0.00473085		-0.18841	0.485088
Q96A72|MGN2_HUMAN Protein mago nashi homolog 2 OS=Homo sapiens OX=9606 GN=MAGOHB PE=1 SV=1	Q96A72	MAGOHB		0	-0.0222516	-0.342946	-0.351297	-0.260994	0	0.321368	-0.0754892	-0.198096	0.0611143	0	-0.0705748	-0.337097	-0.197332	0.046628	0	0.456374	0.101442	0.364404	-0.199356		0		0.171229	0.683087		-0.163523	0.2286		-0.0955802	0.00058492		-0.0881519	0.219856
P11233|RALA_HUMAN Ras-related protein Ral-A OS=Homo sapiens OX=9606 GN=RALA PE=1 SV=1	P11233	RALA		0	0.066439	-0.0169035	-0.107356	0.0523886	0	-0.0488778	0.136034	-0.0301021	0.0796208	0	0.123728	-0.0850162	0.131462	0.127071	0	0.231165	0.243959	0.0504195	0.494321		0		0.0931135	0.683087		0.0695184	0.133223		0.0111057	0.00058492		0.18835	0.424121
P02144|MYG_HUMAN Myoglobin OS=Homo sapiens OX=9606 GN=MB PE=1 SV=2	P02144	MB		0	0.164117	0.0239242	0.326693	0.248177	0	0.862332	-0.625011	-0.935444	0.901484	0	-0.362523	-0.520107	-0.407496	-0.528157	0	0.799875	0.522254	0.848421	0.560309		0		0.36595	0.683087		-0.149735	0.0742748		-0.0419567	0.00058492		0.295453	0.211914
P46782|RS5_HUMAN 40S ribosomal protein S5 OS=Homo sapiens OX=9606 GN=RPS5 PE=1 SV=4	P46782	RPS5		0	-0.0402186	-0.137259	-0.171843	-0.0732974	0	0.0762616	0.101839	-0.0912767	0.20835	0	0.091175	-0.0109138	-0.0606898	-0.0952153	0	0.254579	0.0920173	0.214386	0.103053		0		0.0954492	0.683087		0.0114209	0.0235726		-0.0273558	0.00058492		0.0357226	0.0742024
Q12906|ILF3_HUMAN Interleukin enhancer-binding factor 3 OS=Homo sapiens OX=9606 GN=ILF3 PE=1 SV=3	Q12906	ILF3		0	0.51256	0.189651	0.709732	0.395964	0	0.00632182	-0.111595	-0.0965342	0.204476	0	-0.124502	-0.152625	-0.161889	0.0353844	0	0.404316	0.0950683	0.384172	0.246183		0		0.199674	0.683087		0.00512473	0.00731729		0.20887	0.00058492		0.220502	0.672205
Q04837|SSBP_HUMAN Single-stranded DNA-binding protein;mitochondrial OS=Homo sapiens OX=9606 GN=SSBP1 PE=1 SV=1	Q04837	SSBP1		0	-0.0293157	-0.0351919	-0.00710679	-0.108597	0	-0.0146623	-0.0954916	-0.310323	-0.0798032	0	-0.244122	-0.216183	-0.22928	-0.135477	0	-0.0637149	-0.0284928	0.186527	0.0512945		0		-0.0879536	0.683087		-0.0938398	0.249067		-0.0900456	0.00058492		-0.0681458	0.301407
P12955|PEPD_HUMAN Xaa-Pro dipeptidase OS=Homo sapiens OX=9606 GN=PEPD PE=1 SV=3	P12955	PEPD		0	0.0314842	-0.061904	-0.0604002	-0.101735	0	0.0601044	-0.0835412	-0.307071	0.00701654	0	0.045842	-0.0946982	0.0512439	0.0428448	0	0.109947	0.0245918	-0.0843371	0.0583731		0		0.0618443	0.683087		-0.0538879	0.204077		-0.100141	0.00058492		0.00162483	0.00331137
A0A0U1RQK4|A0A0U1RQK4_HUMAN [Protein ADP-ribosylarginine] hydrolase-like protein 1 OS=Homo sapiens OX=9606 GN=ADPRHL1 PE=1 SV=1	A0A0U1RQK4	ADPRHL1		0	-0.0153454	-0.111871	-0.118257	-0.00909333	0	0.0998634	-0.0668124	-0.266829	0.0720783	0	-0.322618	-0.328228	-0.278215	-0.0913385	0	-0.406324	-0.118769	-0.375382	-0.135971		0		-0.161106	0.683087		-0.15642	0.406399		-0.259671	0.309774		-0.0410812	0.147135
Q86U28|ISCA2_HUMAN Iron-sulfur cluster assembly 2 homolog;mitochondrial OS=Homo sapiens OX=9606 GN=ISCA2 PE=1 SV=2	Q86U28	ISCA2		0	0.055422	-0.0676967	0.0418967	-0.042005	0	-0.0461409	-0.142917	-0.363222	0.0462769	0	0.13513	-0.225652	0.0829474	0.0940783	0	0.223998	0.0399086	0.419688	0.395694		0		0.0921023	0.683087		-0.0990892	0.238742		0.0453275	0.00058492		0.123511	0.287582
Q9Y3B7|RM11_HUMAN 39S ribosomal protein L11;mitochondrial OS=Homo sapiens OX=9606 GN=MRPL11 PE=1 SV=1	Q9Y3B7	MRPL11		0	0.122093	0.0576143	0.0536324	0.0268285	0	-0.0458744	0.000809687	-0.1696	0.122072	0	0.0760414	0.058021	0.0424505	0.0518604	0	0.179919	0.0229578	0.118459	0.0419865		0		0.0830449	0.683087		0.0348507	0.151847		0.0112353	0.00058492		0.0606868	0.369792
F5H5D3|F5H5D3_HUMAN Tubulin alpha chain OS=Homo sapiens OX=9606 GN=TUBA1C PE=1 SV=1	F5H5D3	TUBA1C		0	-0.184111	-0.269311	-0.222943	-0.0492567	0	-0.276248	-0.355438	-0.589322	-0.128081	0	-0.366656	-0.229964	-0.227457	-0.181285	0	0.184166	0.331227	0.323075	0.226907		0		-0.160712	0.683087		-0.130871	0.12372		-0.179162	0.00058492		-0.0329289	0.0558497
Q13144|EI2BE_HUMAN Translation initiation factor eIF-2B subunit epsilon OS=Homo sapiens OX=9606 GN=EIF2B5 PE=1 SV=3	Q13144	EIF2B5		0	0.00364562	-0.0534198	-0.12118	-0.0880816	0	0.0625723	-0.013141	-0.234066	0.145492	0	0.0402848	-0.0952637	0.128326	0.178109	0	0.318285	0.175147	0.0922926	0.0926784		0		0.106197	0.683087		0.00333056	0.00572646		-0.033657	0.00058492		0.0820494	0.278863
Q9H4A3|WNK1_HUMAN Serine/threonine-protein kinase WNK1 OS=Homo sapiens OX=9606 GN=WNK1 PE=1 SV=2	Q9H4A3	WNK1		0	-0.284355	-0.321051	-0.260076	-0.558372	0	0	0	0	0	0	-0.121912	-0.322112	-0.228522	0.0807128	0	0	0	0	0		0		-0.101567	0.683087		-0.160791	0.24524		-0.12215	0.00058492		-0.119415	0.165528
Q9Y2R0|COA3_HUMAN Cytochrome c oxidase assembly factor 3 homolog;mitochondrial OS=Homo sapiens OX=9606 GN=COA3 PE=1 SV=1	Q9Y2R0	COA3		0	0.271558	0.00691905	0.306981	-0.0467921	0	-0.0455306	0.0226032	-0.127091	-0.0689722	0	-0.706942	-0.426206	-0.323442	-0.145478	0	-1.81934	-0.190048	-1.89772	-0.215511		0		-0.575064	0.683087		-0.146683	0.210384		-0.510317	0.00058492		-0.119188	0.591367
Q8IWL3|HSC20_HUMAN Iron-sulfur cluster co-chaperone protein HscB;mitochondrial OS=Homo sapiens OX=9606 GN=HSCB PE=1 SV=3	Q8IWL3	HSCB		0	-0.0565217	-0.138425	-0.0168558	-0.00401999	0	0.0384939	0.202701	-0.0675344	0.118282	0	0.159013	0.0504754	0.269733	0.449434	0	0.367214	-0.013367	0.3598	0.24774		0		0.12705	0.683087		0.0253461	0.0432402		0.136286	0.00058492		0.202859	0.485088
Q96MF2|STAC3_HUMAN SH3 and cysteine-rich domain-containing protein 3 OS=Homo sapiens OX=9606 GN=STAC3 PE=1 SV=1	Q96MF2	STAC3		0	0.0431041	0.00949303	-0.0217938	0.0661179	0	-0.129575	0.0765932	-0.072536	-0.030566	0	-0.117226	-0.192247	-0.143171	-0.088252	0	-0.101121	0.153917	-0.179736	0.196413		0		-0.0762046	0.683087		0.011939	0.0220617		-0.104309	0.00473085		0.0359281	0.0895279
P49588|SYAC_HUMAN Alanine--tRNA ligase;cytoplasmic OS=Homo sapiens OX=9606 GN=AARS PE=1 SV=2	P49588	AARS		0	-0.00858384	-0.119706	-0.0868862	-0.104947	0	-0.234118	-0.152988	-0.18198	-0.392548	0	0.0615579	-0.122124	0.0728756	0.128127	0	-0.328653	-0.0608573	-0.252543	-0.100364		0		-0.127449	0.683087		-0.113919	0.568656		-0.112133	0.00058492		-0.117433	0.237742
Q99436|PSB7_HUMAN Proteasome subunit beta type-7 OS=Homo sapiens OX=9606 GN=PSMB7 PE=1 SV=1	Q99436	PSMB7		0	-0.03852	-0.05447	-0.153972	-0.0937145	0	-0.0831528	-0.263222	-0.202834	-0.710249	0	-0.101555	0.0289001	0.00233773	-0.0614418	0	-0.0241886	-0.0592472	-0.0372821	0.028493		0		-0.0618542	0.683087		-0.0870099	0.197321		-0.0979377	0.00058492		-0.209228	0.282739
Q15029|U5S1_HUMAN 116 kDa U5 small nuclear ribonucleoprotein component OS=Homo sapiens OX=9606 GN=EFTUD2 PE=1 SV=1	Q15029	EFTUD2		0	0.00716044	-0.0870506	-0.00878474	-0.00724591	0	0.18555	-0.191413	-0.325417	0.0198025	0	-0.0424568	-0.119286	-0.0269898	-0.0337958	0	0.333033	0.100257	0.364216	-0.0233422		0		0.120822	0.683087		-0.0743731	0.165382		0.000755997	0.0001404		-0.0111454	0.0495022
P14625|ENPL_HUMAN Endoplasmin OS=Homo sapiens OX=9606 GN=HSP90B1 PE=1 SV=1	P14625	HSP90B1		0	-0.127259	-0.250473	-0.218853	-0.122475	0	-0.0191375	-0.089495	-0.384515	0.0521122	0	0.00650536	-0.0170782	0.14803	0.0429721	0	-0.638832	0.0639299	-0.62624	-0.0440504		0		-0.194681	0.683087		-0.073279	0.151847		-0.270395	0.00473085		-0.0178603	0.0550917
Q04760|LGUL_HUMAN Lactoylglutathione lyase OS=Homo sapiens OX=9606 GN=GLO1 PE=1 SV=4	Q04760	GLO1		0	-0.142394	-0.0470404	0.0952263	-0.0374845	0	-0.029842	0.00757201	0.0704668	-0.460315	0	-0.00682405	0.0668791	-0.0887011	-0.00713097	0	-0.0972107	0.214175	-0.262835	0.0572785		0		-0.0690677	0.683087		0.0603964	0.141973		-0.0464607	0.00058492		-0.111913	0.200542
P51687|SUOX_HUMAN Sulfite oxidase;mitochondrial OS=Homo sapiens OX=9606 GN=SUOX PE=1 SV=2	P51687	SUOX		0	0.207458	-0.0197218	0.0775986	-0.0854118	0	0.0657527	0.042645	-0.040376	0.167094	0	-0.012118	-0.134992	-0.00291202	0.109087	0	0.0615212	0.0390016	0.112032	0.323478		0		0.0806536	0.683087		-0.0182668	0.0472263		0.0365858	0.00058492		0.128562	0.335291
Q969Q5|RAB24_HUMAN Ras-related protein Rab-24 OS=Homo sapiens OX=9606 GN=RAB24 PE=1 SV=1	Q969Q5	RAB24		0	0.109285	0.0254096	0.0999845	0.012178	0	0.0832133	0.0590971	-0.0929034	0.150909	0	-0.00493612	-0.0936716	-0.0315407	0.151929	0	0.0727353	0.014282	0.10885	0.431844		0		0.0650745	0.683087		0.00127926	0.00252194		0.0210977	0.00058492		0.186715	0.485088
P50993|AT1A2_HUMAN Sodium/potassium-transporting ATPase subunit alpha-2 OS=Homo sapiens OX=9606 GN=ATP1A2 PE=1 SV=1	P50993	ATP1A2		0	0.0758869	-0.0831752	-0.102589	-0.195837	0	0.0332562	-0.174001	-0.402997	-0.0202549	0	-0.320258	-0.233715	-0.150535	-0.0631936	0	-0.655338	-0.10161	-0.955221	-0.383588		0		-0.216613	0.683087		-0.148125	0.574077		-0.402836	0.0868876		-0.165718	0.460375
Q9Y394|DHRS7_HUMAN Dehydrogenase/reductase SDR family member 7 OS=Homo sapiens OX=9606 GN=DHRS7 PE=1 SV=1	Q9Y394	DHRS7		0	-0.032435	-0.226679	-0.147773	0.0153577	0	-0.00340412	0.0382368	-0.183541	0.0598804	0	-0.408323	-0.0945092	0.217696	0.049108	0	-0.070821	-0.129002	-0.0118105	0.131084		0		-0.128746	0.683087		-0.102988	0.245136		-0.0313569	0.00058492		0.0638574	0.372686
C9JCA5|C9JCA5_HUMAN Troponin T;fast skeletal muscle (Fragment) OS=Homo sapiens OX=9606 GN=TNNT3 PE=1 SV=1	C9JCA5	TNNT3		0	-0.155217	-0.29873	-0.18583	-0.184855	0	0	0	0	0	0	-0.75742	-0.415742	-0.43683	-0.179317	0	0	0	0	0		0		-0.228159	0.683087		-0.178618	0.24407		-0.155665	0.00058492		-0.0910429	0.347453
Q92597|NDRG1_HUMAN Protein NDRG1 OS=Homo sapiens OX=9606 GN=NDRG1 PE=1 SV=1	Q92597	NDRG1		0	-0.114028	-0.274604	-0.561974	-0.240274	0	0	0	0	0	0	-0.345635	-0.243047	-0.14598	-0.0761968	0	0	0	0	0		0		-0.114916	0.683087		-0.129413	0.243011		-0.176988	0.00058492		-0.0791176	0.278863
Q16204|CCDC6_HUMAN Coiled-coil domain-containing protein 6 OS=Homo sapiens OX=9606 GN=CCDC6 PE=1 SV=2	Q16204	CCDC6		0	-0.0914797	0.113721	-0.130931	-0.0271294	0	0.0509162	-0.0381308	-0.0845297	0.22682	0	0.209603	0.118566	0.190074	0.162932	0	0.390651	0.366021	0.200178	0.248241		0		0.139923	0.683087		0.140044	0.243011		0.0436977	0.00058492		0.152716	0.529623
P13645|K1C10_HUMAN Keratin;type I cytoskeletal 10 OS=Homo sapiens OX=9606 GN=KRT10 PE=1 SV=6	P13645	KRT10		0	-0.191436	-0.141786	0.128975	-0.144371	0	0.584761	1.83421	0.671975	0.975305	0	0.366636	1.06654	-0.117433	0.409218	0	0.0955549	-0.0496104	0.0171929	0.252681		0		0.213879	0.683087		0.677338	0.224712		0.175178	0.00058492		0.373208	0.385944
P16284|PECA1_HUMAN Platelet endothelial cell adhesion molecule OS=Homo sapiens OX=9606 GN=PECAM1 PE=1 SV=2	P16284	PECAM1		0	-0.381432	-0.535247	-0.507245	-0.345205	0					0	-0.00135949	-0.00606217	0.29402	-0.0798119							0		-0.191396	0.683087		-0.270655	0.213077		-0.106612	0.00058492		-0.212508	0.447289
Q711Q0|CEFIP_HUMAN Cardiac-enriched FHL2-interacting protein OS=Homo sapiens OX=9606 GN=CEFIP PE=1 SV=2	Q711Q0	CEFIP		0	0.116004	0.0983802	-0.16557	-0.0388882	0	0	0	0	0	0	0.421481	0.203566	0.308419	0.228121	0	0	0	0	0		0		0.134371	0.683087		0.0754865	0.204663		0.0357123	0.00058492		0.0473083	0.135292
P55209|NP1L1_HUMAN Nucleosome assembly protein 1-like 1 OS=Homo sapiens OX=9606 GN=NAP1L1 PE=1 SV=1	P55209	NAP1L1		0	0.201842	0.174175	0.228463	0.00304881	0	-0.108107	-0.0781183	-0.291239	0.10346	0	0.0850298	0.0987162	-0.0706017	-0.0803778	0	0.328564	0.0684355	-0.0774881	-0.201222		0		0.126832	0.683087		0.0658022	0.165382		-0.0527165	0.00058492		-0.0437726	0.114384
Q8NI22|MCFD2_HUMAN Multiple coagulation factor deficiency protein 2 OS=Homo sapiens OX=9606 GN=MCFD2 PE=1 SV=1	Q8NI22	MCFD2		0	-0.218672	-0.227063	-0.225751	-0.110979	0	-0.0336684	0.233593	-0.387555	-0.912952	0	-0.0450381	-0.172118	-0.132338	-0.165006	0	-1.76576	-0.401335	-0.410304	-0.15418		0		-0.515785	0.683087		-0.141731	0.158044		-0.288987	0.309774		-0.335779	0.417679
Q92973|TNPO1_HUMAN Transportin-1 OS=Homo sapiens OX=9606 GN=TNPO1 PE=1 SV=2	Q92973	TNPO1		0	0.0178424	0.058914	-0.0992586	-0.0442092	0	-0.0336474	0.103855	-0.135708	-0.0624562	0	0.148544	0.150181	0.148899	0.168298	0	0.294994	-0.0846146	0.126516	0.040101		0		0.106933	0.683087		0.0570837	0.146938		0.0101123	0.00058492		0.0254333	0.0678751
O14773|TPP1_HUMAN Tripeptidyl-peptidase 1 OS=Homo sapiens OX=9606 GN=TPP1 PE=1 SV=2	O14773	TPP1		0	0.288656	0.212539	0.206012	-0.080763	0	-0.253214	-0.171661	-0.102685	-0.0939996	0	0.434224	0.161862	0.252689	0.06047	0	0.317118	0.0754241	0.133297	0.0921827		0		0.196696	0.683087		0.069541	0.107438		0.122328	0.00058492		-0.00552747	0.0130601
P13646|K1C13_HUMAN Keratin;type I cytoskeletal 13 OS=Homo sapiens OX=9606 GN=KRT13 PE=1 SV=4	P13646	KRT13		0	0.117512	-0.183406	0.347757	-0.189473	0	0	0	0	0	0	0.435886	0.415905	-0.640923	0.0644746	0	0	0	0	0		0		0.138349	0.683087		0.0581248	0.0594093		-0.0732915	0.00058492		-0.0312496	0.0849893
A1L0T0|ILVBL_HUMAN Acetolactate synthase-like protein OS=Homo sapiens OX=9606 GN=ILVBL PE=1 SV=2	A1L0T0	ILVBL		0	-0.0678535	-0.0481979	-0.248933	-0.113799	0	0.0784985	-0.0777094	-0.153266	0.135601	0	0.197072	0.075973	0.205147	0.167274	0	0.158561	0.128564	0.0271755	-0.0983739		0		0.0915697	0.683087		0.0196574	0.0442652		-0.0424691	0.00058492		0.0226755	0.0420957
Q8TDC0|MYOZ3_HUMAN Myozenin-3 OS=Homo sapiens OX=9606 GN=MYOZ3 PE=1 SV=2	Q8TDC0	MYOZ3		0	-0.0388838	0.00368162	-0.0862293	-0.0391633	0	-0.238789	0.0681282	0.307312	0.475785	0	0.0993705	0.100795	0.0800517	0.0331284	0	-0.509412	-0.22145	-0.355114	-0.2302		0		-0.171929	0.683087		-0.0122115	0.0231889		-0.0134948	0.00058492		0.0598873	0.0659263
Q9NPC6|MYOZ2_HUMAN Myozenin-2 OS=Homo sapiens OX=9606 GN=MYOZ2 PE=1 SV=1	Q9NPC6	MYOZ2		0	-0.715587	-0.499457	-0.432859	-0.113524	0	-0.113976	-0.150274	-0.252043	0.028351	0	-0.205586	-0.296824	-0.0125349	-0.109217	0	0.1351	-0.186423	0.0418359	-0.142797		0		-0.225012	0.683087		-0.283245	0.644323		-0.1639	0.00058492		-0.0842968	0.400857
E9PCK9|E9PCK9_HUMAN Muscular LMNA-interacting protein (Fragment) OS=Homo sapiens OX=9606 GN=MLIP PE=1 SV=1	E9PCK9	MLIP		0	-0.105877	0.340038	0.00824676	0.748644	0	0.454612	-0.513555	-0.781416	0.0669595	0	-0.0635543	0.0649097	0.230143	0.330588	0	0.776841	-0.288959	0.736432	0.00528776		0		0.265505	0.683087		-0.0993917	0.0688633		0.0483513	0.00058492		0.28787	0.40386
Q14195|DPYL3_HUMAN Dihydropyrimidinase-related protein 3 OS=Homo sapiens OX=9606 GN=DPYSL3 PE=1 SV=1	Q14195	DPYSL3		0	0.42856	0.281675	0.240859	0.0997621	0	-0.154921	-0.3956	-0.672942	-0.220878	0	0.10008	-0.0326795	-0.0168405	-0.0393174	0	0.279088	-0.0223362	-0.0641434	-0.130766		0		0.163202	0.683087		-0.0422352	0.0399448		-0.128267	0.00058492		-0.0727999	0.210181
M0R2Z9|M0R2Z9_HUMAN SURP and G-patch domain-containing protein 2 OS=Homo sapiens OX=9606 GN=SUGP2 PE=1 SV=1	M0R2Z9	SUGP2		0	0.114441	0.00836269	0.0233388	-0.0902885	0					0	0.082661	-0.370057	-0.0159755	-0.0329784							0		0.0985509	0.683087		-0.180847	0.196309		0.0036816	0.00058492		-0.0616335	0.228633
E7EQR4|E7EQR4_HUMAN Ezrin OS=Homo sapiens OX=9606 GN=EZR PE=1 SV=3	E7EQR4	EZR		0	0.418577	0.0903322	-0.15314	0.0576891	0	-0.295653	-0.0459108	-0.511702	-0.182322	0	0.369493	0.321375	-0.703941	-0.304779	0	0.36735	0.31529	0.19419	-0.0155676		0		0.214942	0.683087		0.170271	0.249067		-0.293648	0.00058492		-0.111245	0.296894
Q96S96|PEBP4_HUMAN Phosphatidylethanolamine-binding protein 4 OS=Homo sapiens OX=9606 GN=PEBP4 PE=1 SV=3	Q96S96	PEBP4		0	-0.0944275	0.193171	-0.199647	-0.188046	0	0.0302323	-0.117638	-0.158917	-0.0824552	0	0.254804	0.584703	0.075781	0.285156	0	0.362609	0.286624	0.209184	0.355143		0		0.138305	0.683087		0.236715	0.24352		-0.0183997	0.00058492		0.0924496	0.132496
O76070|SYUG_HUMAN Gamma-synuclein OS=Homo sapiens OX=9606 GN=SNCG PE=1 SV=2	O76070	SNCG		0	0.107942	-0.0716878	0.130108	0.0622962	0					0	0.0875997	-0.0841472	0.0852742	0.17502							0		0.0977706	0.683087		-0.0779175	0.214944		0.107691	0.00058492		0.118658	0.393851
Q13363|CTBP1_HUMAN C-terminal-binding protein 1 OS=Homo sapiens OX=9606 GN=CTBP1 PE=1 SV=2	Q13363	CTBP1		0	-0.0314186	-0.245866	-0.083676	-0.127411	0	0.175426	0.0778546	0.1227	0.465173	0	-0.00765298	-0.145217	0.130408	0.17067	0	0.474745	0.329521	0.246783	0.533107		0		0.152775	0.683087		0.00407302	0.00290625		0.104054	0.00058492		0.260385	0.407865
P13929|ENOB_HUMAN Beta-enolase OS=Homo sapiens OX=9606 GN=ENO3 PE=1 SV=5	P13929	ENO3		0	-0.109056	-0.165141	-0.147859	-0.184517	0	-0.0786998	0.0833005	0.0431304	-0.104998	0	-0.230974	-0.257247	-0.0734189	-0.201646	0	0.0554294	0.305514	-0.129539	0.198584		0		-0.0908251	0.683087		-0.00839359	0.00788115		-0.0769217	0.00058492		-0.0731443	0.150959
O94826|TOM70_HUMAN Mitochondrial import receptor subunit TOM70 OS=Homo sapiens OX=9606 GN=TOMM70 PE=1 SV=1	O94826	TOMM70		0	0.237704	0.108112	0.153563	0.196705	0	0.11556	0.192154	-0.11688	-0.0330829	0	0.237053	0.0803084	0.13083	0.142066	0	-0.122462	0.00194909	-0.0930738	0.109183		0		0.116964	0.683087		0.0956309	0.259656		0.0186098	0.00058492		0.103718	0.425188
Q9NUB1|ACS2L_HUMAN Acetyl-coenzyme A synthetase 2-like;mitochondrial OS=Homo sapiens OX=9606 GN=ACSS1 PE=1 SV=2	Q9NUB1	ACSS1		0	0.217416	0.153188	0.182932	-0.0206551	0	-0.0973864	-0.155327	-0.0309284	0.263345	0	0.136286	-0.0447073	-0.0559674	0.155669	0	0.1428	-0.271018	0.129216	0.102372		0		0.0997788	0.683087		-0.0794663	0.124989		0.056313	0.00058492		0.125183	0.449515
O60888|CUTA_HUMAN Protein CutA OS=Homo sapiens OX=9606 GN=CUTA PE=1 SV=2	O60888	CUTA		0	0.0574869	-0.0580707	0.0208227	0.0171171	0	-0.063693	0.151315	-0.130912	0.109315	0	0.132876	-0.0499565	0.216163	0.0492887	0	0.342934	0.0225449	0.2079	0.188298		0		0.117401	0.683087		0.0164582	0.0385433		0.0784935	0.00058492		0.0910047	0.435087
Q9Y316|MEMO1_HUMAN Protein MEMO1 OS=Homo sapiens OX=9606 GN=MEMO1 PE=1 SV=1	Q9Y316	MEMO1		0	0.136475	-0.038162	0.0934505	-0.0786453	0	0	0	0	0	0	0.184644	0.0844843	0.371524	0.243683	0	0	0	0	0		0		0.0802798	0.683087		0.0115806	0.0385433		0.116244	0.00058492		0.0412594	0.0957416
O00273|DFFA_HUMAN DNA fragmentation factor subunit alpha OS=Homo sapiens OX=9606 GN=DFFA PE=1 SV=1	O00273	DFFA		0	0.0890124	-0.0389023	-0.199415	-0.11959	0	-0.0952688	-0.152856	-0.159724	0.142026	0	0.166839	0.0185833	0.271191	0.4376	0	0.285903	0.062311	0.214866	0.335814		0		0.111622	0.683087		-0.0277159	0.06599		0.0317297	0.00058492		0.198963	0.380254
P24043|LAMA2_HUMAN Laminin subunit alpha-2 OS=Homo sapiens OX=9606 GN=LAMA2 PE=1 SV=4	P24043	LAMA2		0	-0.00854592	0.189282	0.124882	0.193045	0	0.0261813	0.0112672	-0.0273353	0.13033	0	0.0863685	0.0746263	0.123523	0.254013	0	0.262937	0.141878	0.343353	0.309984		0		0.0917352	0.683087		0.104263	0.332184		0.141106	0.00360751		0.221843	0.900496
Q96QK1|VPS35_HUMAN Vacuolar protein sorting-associated protein 35 OS=Homo sapiens OX=9606 GN=VPS35 PE=1 SV=2	Q96QK1	VPS35		0	0.0228208	-0.123846	0.0612812	-0.0259323	0	0.0535511	-0.0525517	-0.199364	0.131653	0	0.0248709	-0.0524592	0.0707234	0.156602	0	0.206986	0.0911853	0.152079	0.200263		0		0.0770572	0.683087		-0.0344179	0.0837745		0.02118	0.00058492		0.115646	0.483382
Q96HJ9|FMC1_HUMAN Protein FMC1 homolog OS=Homo sapiens OX=9606 GN=FMC1 PE=1 SV=2	Q96HJ9	FMC1		0	-0.0608785	-0.171712	0.00989223	-0.134704	0	-0.0856111	0.0227283	-0.167297	0.0784448	0	0.0199204	-0.000756544	0.108271	0.0893905	0	-0.160285	0.117191	0.1115	0.476409		0		-0.0717136	0.683087		-0.00813717	0.0165105		0.0155916	0.00058492		0.127385	0.214076
Q9BY32|ITPA_HUMAN Inosine triphosphate pyrophosphatase OS=Homo sapiens OX=9606 GN=ITPA PE=1 SV=2	Q9BY32	ITPA		0	-0.0261226	0.0206866	-0.214337	-0.0587361	0	0.0224268	-0.355384	-0.446247	-0.0883794	0	0.145202	0.0720998	0.0437652	0.135869	0	0.188793	-0.0170865	0.188332	0.111318		0		0.0825748	0.683087		-0.0699211	0.0913793		-0.107122	0.00058492		0.0250178	0.0634421
P00338|LDHA_HUMAN L-lactate dehydrogenase A chain OS=Homo sapiens OX=9606 GN=LDHA PE=1 SV=2	P00338	LDHA		0	-0.387787	-0.256203	-0.176083	-0.115388	0	-0.201197	0.0793929	-0.0998202	0.0520697	0	-0.420314	-0.31756	-0.0473507	-0.268899	0	0.242834	0.384152	0.315946	0.189216		0		-0.191616	0.683087		-0.0275545	0.0231889		-0.00182701	0.0001404		-0.0357502	0.0558497
O60941|DTNB_HUMAN Dystrobrevin beta OS=Homo sapiens OX=9606 GN=DTNB PE=1 SV=1	O60941	DTNB							0	0.0413902	0.202191	0.0241203	0.289738						0	0.580431	0.416482	0.228641	0.441356		0		0.310911	0.683087		0.309336	0.388216		0.126381	0.00058492		0.365547	0.696399
Q8NI37|PPTC7_HUMAN Protein phosphatase PTC7 homolog OS=Homo sapiens OX=9606 GN=PPTC7 PE=2 SV=1	Q8NI37	PPTC7		0	0.196168	-0.1053	-0.120441	-0.0554105	0	-0.0139585	-0.0997822	-0.181145	0.0649383	0	0.000711908	-0.115349	-0.0942325	-0.0508144	0	0.156688	-0.016854	0.210388	0.355375		0		0.0849024	0.683087		-0.0843213	0.365993		-0.0463575	0.00058492		0.0785221	0.158188
Q13561|DCTN2_HUMAN Dynactin subunit 2 OS=Homo sapiens OX=9606 GN=DCTN2 PE=1 SV=4	Q13561	DCTN2		0	-0.0098871	-0.112624	-0.0624199	0.00239719	0	-0.0578584	-0.0616263	-0.414176	-0.318641	0	-0.0745005	-0.111984	-0.12421	-0.025936	0	-0.0976487	-0.0136391	-0.136024	-0.0972727		0		-0.0599737	0.683087		-0.0749683	0.259656		-0.184207	0.0735917		-0.109863	0.324331
Q86WV7|Q86WV7_HUMAN CCDC43 protein OS=Homo sapiens OX=9606 GN=CCDC43 PE=1 SV=1	Q86WV7	CCDC43		0	0.253592	-0.0967376	0.0475266	0.0627729	0					0	0.0204279	-0.121216	0.0223189	-0.00510561							0		0.13701	0.683087		-0.108977	0.253007		0.0349228	0.00058492		0.0288337	0.0817124
A0A2U3TZH3|A0A2U3TZH3_HUMAN Elongation factor 1-alpha OS=Homo sapiens OX=9606 GN=EEF1A2 PE=1 SV=1	A0A2U3TZH3	EEF1A2		0	-0.0210181	-0.0494613	-0.086207	0.075399	0	-0.397974	0.00222843	0.0587452	0.374927	0	-0.132202	-0.313337	-0.167514	-0.180709	0	0.0382919	0.00153153	-0.273285	-0.0843876		0		-0.128226	0.683087		-0.0897595	0.16895		-0.117065	0.00058492		0.0463074	0.0611205
O14983|AT2A1_HUMAN Sarcoplasmic/endoplasmic reticulum calcium ATPase 1 OS=Homo sapiens OX=9606 GN=ATP2A1 PE=1 SV=1	O14983	ATP2A1		0	-0.204885	-0.230763	-0.302649	-0.0717817	0	-0.0896117	0.128713	0.0134152	0.00687784	0	-0.59299	-0.509583	-0.0975817	-0.316951	0	0.129708	0.0255884	-0.062677	0.0891293		0		-0.189445	0.683087		-0.146511	0.152089		-0.112373	0.00058492		-0.0731815	0.162127
P57088|TMM33_HUMAN Transmembrane protein 33 OS=Homo sapiens OX=9606 GN=TMEM33 PE=1 SV=2	P57088	TMEM33		0	-0.0286366	0.0896888	-0.125688	-0.0280427	0	0.0485353	-0.131448	-0.262439	0.0490687	0	0.0851022	0.140768	0.124337	0.104148	0	0.277391	0.220744	0.326775	0.0448065		0		0.0955981	0.683087		0.0799381	0.148548		0.0157462	0.00058492		0.0424951	0.219856
Q00577|PURA_HUMAN Transcriptional activator protein Pur-alpha OS=Homo sapiens OX=9606 GN=PURA PE=1 SV=2	Q00577	PURA		0	0.101453	0.0366111	-0.00397899	0.0206752	0	-0.00872872	-0.0836105	-0.220982	0.0761243	0	0.0138495	-0.0897116	0.0353342	0.0894612	0	0.264722	0.0149502	0.0993446	0.136398		0		0.0928241	0.683087		-0.0304402	0.0870045		-0.0225705	0.00058492		0.0806647	0.48498
Q8WWI1|LMO7_HUMAN LIM domain only protein 7 OS=Homo sapiens OX=9606 GN=LMO7 PE=1 SV=3	Q8WWI1	LMO7		0	0.0961425	0.373822	0.366628	0.419934	0	0.0920863	-0.068958	-0.232076	0.027878	0	-0.0505111	-0.0962094	0.0695107	0.0291933	0	0.183322	0.0422008	0.0379437	0.159431		0		0.0802598	0.683087		0.0627138	0.0737898		0.0605017	0.00058492		0.159109	0.389225
Q12849|GRSF1_HUMAN G-rich sequence factor 1 OS=Homo sapiens OX=9606 GN=GRSF1 PE=1 SV=3	Q12849	GRSF1		0	0.0408701	-0.0707235	0.0627473	0.107768	0	0.320977	0.160435	0.0190713	0.177025	0	-0.103519	-0.213727	0.0437937	-0.0180855	0	0.262926	-0.0581607	0.273542	-0.0216053		0		0.130313	0.683087		-0.0455441	0.073021		0.0997886	0.00058492		0.0612755	0.234125
O75369|FLNB_HUMAN Filamin-B OS=Homo sapiens OX=9606 GN=FLNB PE=1 SV=2	O75369	FLNB		0	0.116241	-0.0508855	-0.043187	0.0486836	0	0.155471	-0.139735	-0.129762	-0.165811	0	-0.121227	-0.110921	-0.106038	-0.0889114	0	0.559397	0.213374	0.515056	0.137727		0		0.17747	0.683087		-0.0220419	0.0337411		0.0590175	0.00058492		-0.0170779	0.0321306
P36957|ODO2_HUMAN Dihydrolipoyllysine-residue succinyltransferase component of 2-oxoglutarate dehydrogenase complex;mitochondrial OS=Homo sapiens OX=9606 GN=DLST PE=1 SV=4	P36957	DLST		0	0.24018	0.15202	0.351272	0.229591	0	0.351085	-0.000354071	-0.018692	0.136193	0	0.0943974	-0.051406	0.130667	0.0434636	0	-0.135168	-0.0490878	0.138324	0.121732		0		0.137624	0.683087		0.012793	0.0287477		0.150393	0.00473085		0.132745	0.646007
Q9UBB4|ATX10_HUMAN Ataxin-10 OS=Homo sapiens OX=9606 GN=ATXN10 PE=1 SV=1	Q9UBB4	ATXN10		0	-0.124625	-0.0264447	-0.184942	-0.133243	0	0.203059	0.0216934	-0.122802	0.183426	0	0.102735	0.0982068	0.0846702	0.174937	0	0.323513	0.108377	0.301061	0.108663		0		0.12617	0.683087		0.0504582	0.172788		0.0194968	0.00058492		0.0834455	0.231969
Q8IWA4|MFN1_HUMAN Mitofusin-1 OS=Homo sapiens OX=9606 GN=MFN1 PE=1 SV=3	Q8IWA4	MFN1		0	0.937797	-0.0723963	0.696204	0.0392062	0	-0.123961	0.136368	-0.531452	-0.0208318	0	0.113292	-0.086818	0.00722691	0.427902	0	0.189144	0.135688	0.189633	0.528641		0		0.279068	0.683087		0.0282103	0.0556469		0.0904029	0.00058492		0.243729	0.419973
P24298|ALAT1_HUMAN Alanine aminotransferase 1 OS=Homo sapiens OX=9606 GN=GPT PE=1 SV=3	P24298	GPT		0	0.297917	0.0388777	0.402162	0.064921	0	-0.149088	0.050483	-0.109237	0.166257	0	-0.723801	-0.470078	-0.282465	-0.259823	0	-0.515838	-0.167046	-0.461841	0.161009		0		-0.272703	0.683087		-0.136941	0.1688		-0.112845	0.00058492		0.0330912	0.0495022
P51116|FXR2_HUMAN Fragile X mental retardation syndrome-related protein 2 OS=Homo sapiens OX=9606 GN=FXR2 PE=1 SV=2	P51116	FXR2		0	0.268532	0.397421	0.220117	0.535739	0	-0.0782912	-0.0614296	-0.25089	-0.0356323	0	0.0404476	-0.115356	0.0160958	0.174932	0	0.205347	0.0205402	0.0575702	0.166554		0		0.109009	0.683087		0.060294	0.0674099		0.0107233	0.00058492		0.210398	0.416124
P13671|CO6_HUMAN Complement component C6 OS=Homo sapiens OX=9606 GN=C6 PE=1 SV=3	P13671	C6		0	-0.795914	0.367046	-1.28838	0.731712	0	1.28437	0.466985	0.615955	-0.166238	0	0.916573	1.30872	0.795644	0.804212	0	0.793356	0.0934308	0.681507	-0.860897		0		0.549596	0.683087		0.559045	0.353349		0.201182	0.00058492		0.127197	0.0501937
Q99832|TCPH_HUMAN T-complex protein 1 subunit eta OS=Homo sapiens OX=9606 GN=CCT7 PE=1 SV=2	Q99832	CCT7		0	-0.0459111	0.0589157	-0.136036	-0.0559938	0	0.102021	0.00354624	-0.0190279	-0.121229	0	0.0514445	0.108612	0.075959	0.00178344	0	0.368923	0.260457	0.0598063	-0.0229443		0		0.119119	0.683087		0.107883	0.248091		-0.00482465	0.00058492		-0.0495959	0.2654
P00414|COX3_HUMAN Cytochrome c oxidase subunit 3 OS=Homo sapiens OX=9606 GN=MT-CO3 PE=1 SV=2	P00414	MT-CO3		0	-0.00363933	0.0196259	0.156274	0.187391	0	-0.027318	0.246097	0.141974	0.319804	0	0.225725	0.18592	0.156982	0.389837	0	0.183054	-0.123137	0.21289	0.445491		0		0.0944556	0.683087		0.0821265	0.141504		0.16703	0.20572		0.335631	1.00298
Q8N4T8|CBR4_HUMAN Carbonyl reductase family member 4 OS=Homo sapiens OX=9606 GN=CBR4 PE=1 SV=3	Q8N4T8	CBR4		0	0.147242	0.0116796	0.0444064	0.028426	0	-0.00561554	-0.015885	-0.077703	0.108115	0	0.110576	-0.034375	0.131791	-0.0155913	0	0.0268773	0.0154421	0.108474	0.240797		0		0.0697698	0.683087		-0.00578457	0.0235726		0.051742	0.00058492		0.0904368	0.326015
A0A087X0X3|A0A087X0X3_HUMAN Heterogeneous nuclear ribonucleoprotein M OS=Homo sapiens OX=9606 GN=HNRNPM PE=1 SV=1	A0A087X0X3	HNRNPM		0	-0.0114507	0.0303026	0.0767124	0.204039	0	0.262992	-0.136161	-0.199185	0.0290237	0	-0.0778	-0.131321	0.0733712	0.031479	0	0.436859	0.0596409	0.474182	0.107048		0		0.15265	0.683087		-0.0443844	0.100949		0.10627	0.00058492		0.0928975	0.425188
Q9BV57|MTND_HUMAN 1;2-dihydroxy-3-keto-5-methylthiopentene dioxygenase OS=Homo sapiens OX=9606 GN=ADI1 PE=1 SV=1	Q9BV57	ADI1		0	-0.281826	-0.384217	-0.42444	-0.288062	0	0	0	0	0	0	-0.102223	-0.319463	-0.00859472	0.0662349	0	0	0	0	0		0		-0.0960122	0.683087		-0.17592	0.24524		-0.108259	0.00058492		-0.0554567	0.125736
P30041|PRDX6_HUMAN Peroxiredoxin-6 OS=Homo sapiens OX=9606 GN=PRDX6 PE=1 SV=3	P30041	PRDX6		0	0.0645503	0.0497064	0.120917	-0.081243	0	-0.0772802	0.0468375	0.103962	-0.14526	0	-0.103766	-0.214102	-0.243824	-0.128845	0	-0.309828	-0.289997	-0.21443	-0.259395		0		-0.106581	0.683087		-0.101889	0.1688		-0.0583436	0.00058492		-0.153686	0.717116
I6L894|I6L894_HUMAN Ankyrin-2 OS=Homo sapiens OX=9606 GN=ANK2 PE=1 SV=1	I6L894	ANK2		0	-0.119293	-0.407217	-0.180434	-0.049872	0	0	0	0	0	0	-0.200218	-0.187393	-0.0675026	0.000232943	0	0	0	0	0		0		-0.0798776	0.683087		-0.148653	0.230487		-0.0619841	0.00058492		-0.0124098	0.0570995
P51580|TPMT_HUMAN Thiopurine S-methyltransferase OS=Homo sapiens OX=9606 GN=TPMT PE=1 SV=1	P51580	TPMT		0	0.0604582	0.0414706	0.112027	0.255935	0	-0.144109	-0.688574	-0.985928	-0.135555	0	0.27133	0.288875	0.0941174	0.218479	0	0.509692	0.020585	0.452192	0.00975035		0		0.174343	0.683087		-0.0844108	0.0556469		-0.0818977	0.00058492		0.0871524	0.195286
O95292|VAPB_HUMAN Vesicle-associated membrane protein-associated protein B/C OS=Homo sapiens OX=9606 GN=VAPB PE=1 SV=3	O95292	VAPB		0	0.166183	0.0967003	0.162148	0.156735	0	0.0702371	-0.0545739	-0.14665	0.136148	0	-0.0843633	-0.168511	-0.0514373	0.0100596	0	0.254596	0.16566	0.0911199	0.230627		0		0.101663	0.683087		0.00981876	0.0165413		0.0137951	0.00058492		0.133392	0.595164
Q9Y613|FHOD1_HUMAN FH1/FH2 domain-containing protein 1 OS=Homo sapiens OX=9606 GN=FHOD1 PE=1 SV=3	Q9Y613	FHOD1		0	0.144559	0.00139386	0.178186	0.158324	0	0.0477684	0.0367347	-0.065658	0.19948	0	-0.0656561	-0.115807	-0.0444947	0.00429509	0	0.298511	0.0752546	0.198818	0.138335		0		0.106296	0.683087		-0.000606011	0.00141267		0.0667127	0.00058492		0.125108	0.586557
P52888|THOP1_HUMAN Thimet oligopeptidase OS=Homo sapiens OX=9606 GN=THOP1 PE=1 SV=2	P52888	THOP1		0	-0.0197138	0.0471537	-0.105841	0.0289586	0	-0.0155536	-0.00813818	-0.164342	0.0881329	0	0.150013	0.0976559	0.159909	0.16726	0	0.389286	0.105715	0.309738	0.196311		0		0.126008	0.683087		0.0605967	0.231848		0.0498659	0.00058492		0.120166	0.596204
P09488|GSTM1_HUMAN Glutathione S-transferase Mu 1 OS=Homo sapiens OX=9606 GN=GSTM1 PE=1 SV=3	P09488	GSTM1		0	0.0608085	-0.170824	0.226664	-0.417307	0	-0.297814	-0.0866095	0.1351	-1.02288	0	0.0309279	-0.224558	0.00783915	-0.305889	0	-1.25911	-0.0787392	-0.462486	0.026934		0		-0.366296	0.683087		-0.140183	0.526763		-0.0232207	0.00058492		-0.429786	0.483382
O43929|ORC4_HUMAN Origin recognition complex subunit 4 OS=Homo sapiens OX=9606 GN=ORC4 PE=1 SV=2	O43929	ORC4		0	0.1748	-0.011099	0.345793	0.170895	0	-0.179139	-0.0248172	0.11835	0.404334	0	-0.277115	-0.552154	0.208988	0.204391	0	-1.91291	-0.466326	-0.0850551	0.141077		0		-0.548591	0.683087		-0.263599	0.249067		0.147019	0.00058492		0.230174	0.808497
P53602|MVD1_HUMAN Diphosphomevalonate decarboxylase OS=Homo sapiens OX=9606 GN=MVD PE=1 SV=1	P53602	MVD		0	0.118204	0.72449	0.493319	0.783883	0	0	0	0	0	0	0.716208	1.60086	0.758477	0.499885	0	0	0	0	0		0		0.208603	0.683087		0.581336	0.238742		0.312949	0.00473085		0.320942	0.393851
B0YIW6|B0YIW6_HUMAN Archain 1;isoform CRA_a OS=Homo sapiens OX=9606 GN=ARCN1 PE=1 SV=1	B0YIW6	ARCN1		0	-0.0419562	-0.175771	-0.0875564	0.00113497	0	0.118747	-0.0859191	-0.358598	0.0384468	0	0.0353583	-0.0625751	0.184578	0.223183	0	0.275445	0.102216	0.0795922	0.0731866		0		0.0968984	0.683087		-0.0555122	0.12657		-0.045496	0.00058492		0.0839878	0.337895
J3KN36|J3KN36_HUMAN Nodal modulator 3 OS=Homo sapiens OX=9606 GN=NOMO3 PE=1 SV=1	J3KN36	NOMO3		0	-0.0153409	-0.0715675	-0.181677	-0.0447987	0	0.117615	-0.0111182	0.150043	0.383166	0	0.0165242	-0.0942824	0.11933	0.0802549	0	0.198688	0.384075	0.423368	0.258042		0		0.0793714	0.683087		0.0517767	0.0594093		0.127766	0.00058492		0.169166	0.408641
Q10567|AP1B1_HUMAN AP-1 complex subunit beta-1 OS=Homo sapiens OX=9606 GN=AP1B1 PE=1 SV=2	Q10567	AP1B1		0	0.11539	-0.0737671	-0.0116554	-0.0441836	0	-0.0818525	-0.220818	-0.280817	-0.036733	0	0.112966	-0.0610055	0.110557	0.180521	0	0.209639	-0.156794	0.203824	0.167279		0		0.0890356	0.683087		-0.128096	0.449866		0.0054774	0.00058492		0.0667207	0.207944
Q9NPA0|EMC7_HUMAN ER membrane protein complex subunit 7 OS=Homo sapiens OX=9606 GN=EMC7 PE=1 SV=1	Q9NPA0	EMC7		0	0.0377676	0.141176	-0.0520857	-0.0245301	0					0	0.181109	0.245519	0.130704	0.125864							0		0.109438	0.683087		0.193347	0.449866		0.039309	0.00058492		0.0506671	0.128951
C9J6U3|C9J6U3_HUMAN Protein diaphanous homolog 2 OS=Homo sapiens OX=9606 GN=DIAPH2 PE=1 SV=3	C9J6U3	DIAPH2		0	0.0856184	-0.148682	0.142137	0.0583055	0	-0.0603096	-0.000498698	-0.256024	0.055053	0	0.121529	-0.124767	0.0792354	0.227043	0	0.172314	-0.10318	0.0309797	0.165392		0		0.0797881	0.683087		-0.0942819	0.332184		-0.000918167	0.0001404		0.126448	0.594366
Q6PCB7|S27A1_HUMAN Long-chain fatty acid transport protein 1 OS=Homo sapiens OX=9606 GN=SLC27A1 PE=1 SV=1	Q6PCB7	SLC27A1		0	0.0022866	0.101109	0.0099058	-0.000433691	0	-0.0197316	0.0128718	-0.175477	0.0817482	0	0.129177	0.161112	0.0914769	0.165454	0	0.259212	0.0376503	0.197021	0.195516		0		0.092736	0.683087		0.0781857	0.248091		0.0307317	0.00058492		0.110571	0.486793
Q9Y2L5|TPPC8_HUMAN Trafficking protein particle complex subunit 8 OS=Homo sapiens OX=9606 GN=TRAPPC8 PE=1 SV=2	Q9Y2L5	TRAPPC8		0	-0.0431376	0.0416011	-0.322271	0.108059	0					0	0.592802	0.541857	0.0789224	0.435984							0		0.274832	0.683087		0.291729	0.239714		-0.121674	0.00058492		0.272022	0.485088
P52566|GDIR2_HUMAN Rho GDP-dissociation inhibitor 2 OS=Homo sapiens OX=9606 GN=ARHGDIB PE=1 SV=3	P52566	ARHGDIB		0	-0.263293	-0.113109	-0.221026	-0.164844	0	1.08702	-0.038489	0.0156179	0.00218789	0	0.0771016	0.454917	0.104801	-0.018444	0	0.463999	0.605522	0.942632	-0.644809		0		0.341206	0.683087		0.22721	0.199723		0.210506	0.00058492		-0.206477	0.317431
Q14738|2A5D_HUMAN Serine/threonine-protein phosphatase 2A 56 kDa regulatory subunit delta isoform OS=Homo sapiens OX=9606 GN=PPP2R5D PE=1 SV=1	Q14738	PPP2R5D		0	-0.128546	0.0396729	-0.259936	-0.156924	0	0.110499	-0.014364	-0.111422	0.117428	0	0.241007	0.281976	0.235204	0.165904	0	0.238654	0.0390403	0.0475993	0.118889		0		0.115403	0.683087		0.0865814	0.181718		-0.0221386	0.00058492		0.0613243	0.155736
H7BY55|H7BY55_HUMAN Complement decay-accelerating factor OS=Homo sapiens OX=9606 GN=CD55 PE=1 SV=2	H7BY55	CD55		0	-0.0230823	0.060237	-0.0860327	0.0133918	0	-0.00740968	-0.183061	-0.236681	0.0115095	0	0.132335	0.466608	0.0660018	-0.0916386	0	0.412515	0.302934	0.320702	0.108632		0		0.128589	0.683087		0.161679	0.172568		0.0159977	0.00058492		0.0104738	0.0271958
Q16851|UGPA_HUMAN UTP--glucose-1-phosphate uridylyltransferase OS=Homo sapiens OX=9606 GN=UGP2 PE=1 SV=5	Q16851	UGP2		0	0.0437796	-0.0753159	-0.024235	-0.0436569	0	-0.145254	0.0561186	0.0162012	0.163118	0	-0.128355	-0.142787	-0.0796911	-0.0483935	0	-0.0664686	-0.0554402	0.0335001	-0.121297		0		-0.0740744	0.683087		-0.0543561	0.162951		-0.0135562	0.00058492		-0.0125573	0.0233724
O15258|RER1_HUMAN Protein RER1 OS=Homo sapiens OX=9606 GN=RER1 PE=1 SV=1	O15258	RER1		0	0.105353	0.0511269	0.451807	0.092177	0	-0.0746167	-0.00587725	-0.24364	0.0780417	0	0.0813988	-0.00416492	0.34485	0.252584	0	0.349934	0.169595	0.215119	0.148764		0		0.115517	0.683087		0.05267	0.153975		0.192034	0.00058492		0.142892	0.673108
P20700|LMNB1_HUMAN Lamin-B1 OS=Homo sapiens OX=9606 GN=LMNB1 PE=1 SV=2	P20700	LMNB1		0	-0.532797	-0.542402	-0.611275	-0.226572	0	0	0	0	0	0	-0.0938451	0.0146527	0.20704	-0.0503342	0	0	0	0	0		0		-0.156661	0.683087		-0.131937	0.142435		-0.101059	0.00058492		-0.0692264	0.251818
Q96A33|CCD47_HUMAN Coiled-coil domain-containing protein 47 OS=Homo sapiens OX=9606 GN=CCDC47 PE=1 SV=1	Q96A33	CCDC47		0	-0.0171738	-0.200244	-0.127996	-0.0688258	0	0.2387	0.160761	0.212043	0.241511	0	-0.0316819	-0.194252	0.0923386	0.0701532	0	0.204415	-0.0752975	0.118949	0.0296559		0		0.0985648	0.683087		-0.0772581	0.132473		0.0738338	0.00058492		0.0681237	0.206671
Q9NTJ5|SAC1_HUMAN Phosphatidylinositide phosphatase SAC1 OS=Homo sapiens OX=9606 GN=SACM1L PE=1 SV=2	Q9NTJ5	SACM1L		0	-0.149638	-0.00507112	-0.117092	-0.0718373	0	0.137276	-0.0401144	-0.197374	-0.0131288	0	0.212271	0.223866	0.292733	0.11574	0	0.314736	0.0329808	0.275671	0.206332		0		0.128661	0.683087		0.0529153	0.111926		0.0634844	0.00058492		0.0592763	0.179647
C9JIZ6|C9JIZ6_HUMAN Prosaposin OS=Homo sapiens OX=9606 GN=PSAP PE=1 SV=2	C9JIZ6	PSAP		0	-0.114247	-0.0397719	0.0174603	-0.0571621	0	-0.0986049	0.0627506	-0.0743874	0.196412	0	0.0544271	0.093461	0.0421431	-0.126274	0	-1.12181	-0.562104	-0.221544	-0.09615		0		-0.32006	0.683087		-0.111416	0.0963156		-0.059082	0.00058492		-0.0207936	0.0378952
P48643|TCPE_HUMAN T-complex protein 1 subunit epsilon OS=Homo sapiens OX=9606 GN=CCT5 PE=1 SV=1	P48643	CCT5		0	0.0122292	0.0890285	-0.012316	0.0204959	0	0.0582792	-0.0502774	-0.134151	0.0615829	0	0.0153124	0.0215351	0.0714642	0.0343784	0	0.385432	0.0477847	0.17223	0.0566517		0		0.117813	0.683087		0.0270177	0.0837745		0.0243068	0.00058492		0.0432772	0.292239
Q9Y2W1|TR150_HUMAN Thyroid hormone receptor-associated protein 3 OS=Homo sapiens OX=9606 GN=THRAP3 PE=1 SV=2	Q9Y2W1	THRAP3		0	0.362838	-0.00660649	0.171588	0.0597941	0	-0.17152	-0.428494	-0.449302	-0.0366687	0	0.0630637	-0.0132722	0.00257808	0.0223912	0	0.42186	0.150076	0.425476	0.152811		0		0.16906	0.683087		-0.0745743	0.0793822		0.0375851	0.00058492		0.0495819	0.209431
Q8ND56|LS14A_HUMAN Protein LSM14 homolog A OS=Homo sapiens OX=9606 GN=LSM14A PE=1 SV=3	Q8ND56	LSM14A							0	-0.916929	-0.0339158	-0.351908	0.228149						0	-0.0254951	-0.0443652	-0.44019	0.404459		0		-0.471212	0.683087		-0.0391405	0.0787723		-0.396049	0.159453		0.316304	0.601757
P54819|KAD2_HUMAN Adenylate kinase 2;mitochondrial OS=Homo sapiens OX=9606 GN=AK2 PE=1 SV=2	P54819	AK2		0	0.24909	-0.053463	0.231348	-0.161303	0	0.202166	0.144202	0.0284958	0.241899	0	-0.171056	-0.152032	-0.0370268	-0.0339351	0	0.239767	0.271335	0.210683	0.435437		0		0.129992	0.683087		0.0525103	0.069394		0.108375	0.00058492		0.120524	0.187481
P17568|NDUB7_HUMAN NADH dehydrogenase [ubiquinone] 1 beta subcomplex subunit 7 OS=Homo sapiens OX=9606 GN=NDUFB7 PE=1 SV=4	P17568	NDUFB7		0	0.324614	0.0397255	0.264062	0.184822	0	-0.116735	0.175535	-0.0493927	0.201475	0	0.0474969	-0.113015	-0.065958	0.0364151	0	0.262736	0.02814	0.159024	0.128078		0		0.129528	0.683087		0.0325965	0.0652613		0.0769339	0.00058492		0.137697	0.673108
P26038|MOES_HUMAN Moesin OS=Homo sapiens OX=9606 GN=MSN PE=1 SV=3	P26038	MSN		0	0.191496	0.336832	0.35317	0.343035	0	-0.0409498	-0.159261	-0.0745149	-0.30781	0	-0.0156001	-0.0367296	-0.143613	-0.0613602	0	0.316194	0.0607961	0.397268	0.0601381		0		0.112785	0.683087		0.0504095	0.0606958		0.133078	0.00058492		0.00850065	0.00784357
P10768|ESTD_HUMAN S-formylglutathione hydrolase OS=Homo sapiens OX=9606 GN=ESD PE=1 SV=2	P10768	ESD		0	0.0108634	0.0252337	-0.12519	-0.0821108	0	-0.113499	0.0115044	0.251963	0.076142	0	0.00556054	0.0277882	0.226131	0.032421	0	-0.447819	-0.142789	-0.417266	0.0117609		0		-0.136224	0.683087		-0.0195657	0.0524901		-0.0160908	0.00058492		0.00955328	0.0277477
P19367|HXK1_HUMAN Hexokinase-1 OS=Homo sapiens OX=9606 GN=HK1 PE=1 SV=3	P19367	HK1		0	0.0747902	-0.0805755	0.0820258	0.0372732	0	-0.0409669	0.185226	-0.197578	0.247713	0	-0.16925	-0.133675	0.0581736	0.095609	0	-0.291758	-0.0804952	-0.268934	0.0855701		0		-0.106796	0.683087		-0.0273801	0.0472263		-0.081578	0.00058492		0.116541	0.503036
Q96AE4|FUBP1_HUMAN Far upstream element-binding protein 1 OS=Homo sapiens OX=9606 GN=FUBP1 PE=1 SV=3	Q96AE4	FUBP1		0	-0.185055	-0.091052	-0.327572	-0.299886	0	0.242722	0.000665224	0.0448173	0.00592137	0	0.134629	0.0415263	0.174553	0.0860532	0	0.499333	0.119539	0.486341	0.214038		0		0.172907	0.683087		0.0176698	0.0432402		0.0945346	0.00058492		0.00153171	0.00219865
Q99873|ANM1_HUMAN Protein arginine N-methyltransferase 1 OS=Homo sapiens OX=9606 GN=PRMT1 PE=1 SV=3	Q99873	PRMT1		0	-0.010632	-0.0915141	-0.0147272	-0.03909	0	0.138328	0.0560099	-0.232793	0.144331	0	0.034213	-0.0973305	0.153373	0.0981125	0	0.105063	0.209106	0.0925526	-0.00673481		0		0.066743	0.683087		0.0190678	0.0305275		-0.000398582	0.0001404		0.0491548	0.197741
Q8WVM8|SCFD1_HUMAN Sec1 family domain-containing protein 1 OS=Homo sapiens OX=9606 GN=SCFD1 PE=1 SV=4	Q8WVM8	SCFD1		0	-0.0477751	-0.0669632	-0.134201	-0.0346979	0	0.0411724	-0.0449913	-0.098771	0.0894822	0	0.109831	0.0205736	0.108198	0.0767253	0	0.308542	0.0545969	0.127831	0.0799619		0		0.102943	0.683087		-0.00919599	0.0284203		0.000764386	0.0001404		0.0528679	0.27431
P62314|SMD1_HUMAN Small nuclear ribonucleoprotein Sm D1 OS=Homo sapiens OX=9606 GN=SNRPD1 PE=1 SV=1	P62314	SNRPD1		0	0.0469231	0.0683085	0.00408616	-0.0114303	0	0.0947133	-0.0779576	-0.566086	-0.111235	0	-0.0420852	-0.101027	0.0281496	-0.139527	0	0.334789	0.162545	0.349779	0.277314		0		0.108585	0.683087		0.0129673	0.024809		-0.0460179	0.00058492		0.00378045	0.00409827
Q9NUQ6|SPS2L_HUMAN SPATS2-like protein OS=Homo sapiens OX=9606 GN=SPATS2L PE=1 SV=2	Q9NUQ6	SPATS2L		0	0.0147018	0.260252	0.309036	0.539203	0					0	-0.406887	-0.297599	-0.242927	0.267233							0		-0.196092	0.683087		-0.0186734	0.0123956		0.0330543	0.00058492		0.403218	0.731322
A0A087WUZ3|A0A087WUZ3_HUMAN Spectrin beta chain OS=Homo sapiens OX=9606 GN=SPTBN1 PE=1 SV=1	A0A087WUZ3	SPTBN1		0	-0.084805	0.0465737	0.0286028	0.184901	0	0.232689	-0.124986	-0.238268	0.00446694	0	0.00103919	0.0401686	-0.0250305	0.0365139	0	0.481773	0.042014	0.452107	0.112867		0		0.157674	0.683087		0.000942593	0.00174999		0.0543529	0.00058492		0.0846872	0.387941
Q9H9J2|RM44_HUMAN 39S ribosomal protein L44;mitochondrial OS=Homo sapiens OX=9606 GN=MRPL44 PE=1 SV=1	Q9H9J2	MRPL44		0	0.0284407	-0.0743651	-0.145416	-0.0601416	0	-0.0261661	0.0425473	-0.0874602	0.194422	0	0.200636	0.0155519	-0.0125768	0.128341	0	0.113252	0.0183872	0.107821	0.235986		0		0.0790407	0.683087		0.00053032	0.00141267		-0.034408	0.00058492		0.124652	0.413134
P39656|OST48_HUMAN Dolichyl-diphosphooligosaccharide--protein glycosyltransferase 48 kDa subunit OS=Homo sapiens OX=9606 GN=DDOST PE=1 SV=4	P39656	DDOST		0	-0.000811059	-0.102386	-0.0504373	-0.0354453	0	0.0427923	-0.253517	-0.229535	0.074933	0	0.0610186	0.0311273	0.157478	0.096321	0	0.167949	-0.0670021	0.23864	0.248959		0		0.0677373	0.683087		-0.0979445	0.230516		0.0290365	0.00058492		0.0961919	0.339051
P62191|PRS4_HUMAN 26S proteasome regulatory subunit 4 OS=Homo sapiens OX=9606 GN=PSMC1 PE=1 SV=1	P62191	PSMC1		0	0.0127614	-0.446568	-0.486265	-0.37648	0	-0.174902	-0.0913772	-0.108288	-0.380361	0	0.0361368	0.0238325	-0.0206066	-0.046523	0	-0.295969	-0.0521697	-0.0584964	-0.0125535		0		-0.105493	0.683087		-0.14157	0.204663		-0.168414	0.00058492		-0.20398	0.474097
P08574|CY1_HUMAN Cytochrome c1;heme protein;mitochondrial OS=Homo sapiens OX=9606 GN=CYC1 PE=1 SV=3	P08574	CYC1		0	0.318191	-0.0233044	0.244965	-0.0199014	0	-0.0577617	0.0244061	-0.347016	0.0112367	0	0.0597139	-0.147422	0.22089	0.0480311	0	0.100114	-0.0928193	0.247383	0.0977603		0		0.105064	0.683087		-0.0597848	0.187538		0.0915556	0.00058492		0.0342817	0.173289
P35244|RFA3_HUMAN Replication protein A 14 kDa subunit OS=Homo sapiens OX=9606 GN=RPA3 PE=1 SV=1	P35244	RPA3		0	-0.0548378	-0.0504396	-0.0852802	-0.0815041	0	0.238129	0.0148843	-0.0594144	-0.231628	0	0.0150527	-0.0283693	0.133369	0.0888937	0	0.185842	0.248587	0.212244	0.179577		0		0.0960463	0.683087		0.0461657	0.0837745		0.0502296	0.00058492		-0.0111654	0.0161865
O43390|HNRPR_HUMAN Heterogeneous nuclear ribonucleoprotein R OS=Homo sapiens OX=9606 GN=HNRNPR PE=1 SV=1	O43390	HNRNPR		0	-0.237991	-0.250333	-0.129833	-0.0329147	0	0.673976	-0.282938	0.037398	-0.0144425	0	-0.0674971	-0.171818	0.0884594	-0.00823387	0	1.04973	0.34746	1.2065	0.253176		0		0.354554	0.683087		-0.0894075	0.0818231		0.300632	0.00058492		0.0493962	0.127532
P37802|TAGL2_HUMAN Transgelin-2 OS=Homo sapiens OX=9606 GN=TAGLN2 PE=1 SV=3	P37802	TAGLN2		0	-0.200286	-0.086579	-0.26016	-0.0770555	0	0.187177	-0.186151	-0.499311	-0.539747	0	0.190831	0.571002	0.279934	0.170767	0	0.668238	0.0983242	0.373208	0.103156		0		0.21149	0.683087		0.0991491	0.0788689		-0.026582	0.00058492		-0.0857198	0.094331
Q8WW22|DNJA4_HUMAN DnaJ homolog subfamily A member 4 OS=Homo sapiens OX=9606 GN=DNAJA4 PE=1 SV=1	Q8WW22	DNAJA4		0	0.19111	0.231416	0.169763	0.0793272	0	-0.071292	-0.211093	-0.387135	-0.0432732	0	0.0229574	-0.0458337	-0.0721502	-0.0271663	0	0.282144	-0.203826	0.0742207	0.0150769		0		0.10623	0.683087		-0.0573341	0.0698257		-0.0538255	0.00058492		0.00599115	0.0189567
P35579|MYH9_HUMAN Myosin-9 OS=Homo sapiens OX=9606 GN=MYH9 PE=1 SV=4	P35579	MYH9		0	-0.0886094	-0.0111337	-0.0287247	0.127375	0	0.371727	-0.0530989	-0.256063	0.00632762	0	0.0623761	0.474365	0.0606178	0.0202071	0	0.145842	-0.200155	0.37214	0.0715865		0		0.122834	0.683087		0.0524941	0.0472263		0.0369923	0.00058492		0.056374	0.30465
P46783|RS10_HUMAN 40S ribosomal protein S10 OS=Homo sapiens OX=9606 GN=RPS10 PE=1 SV=1	P46783	RPS10		0	0.00901638	0.0496534	-0.0158514	0.0902651	0	0.0470072	0.112803	-0.675776	-0.400791	0	-0.169557	0.0159426	0.0134865	0.170553	0	-0.586705	-0.124286	-0.284863	-0.0778135		0		-0.17506	0.683087		0.0135283	0.0299757		-0.240751	0.00058492		-0.0544465	0.0693129
P42677|RS27_HUMAN 40S ribosomal protein S27 OS=Homo sapiens OX=9606 GN=RPS27 PE=1 SV=3	P42677	RPS27		0	0.762276	0.445008	0.674459	0.497008	0					0	-0.0695771	-0.325634	-0.319342	-0.0728586							0		0.34635	0.683087		0.059687	0.0286536		0.177559	0.00058492		0.212075	0.230246
P10412|H14_HUMAN Histone H1.4 OS=Homo sapiens OX=9606 GN=HIST1H1E PE=1 SV=2	P10412	HIST1H1E		0	0.767025	1.65777	1.26927	3.27504	0	-0.850709	-0.140177	-0.272077	-0.270522	0	-0.544832	-0.277208	-0.190778	1.00588	0	-3.57756	-0.857702	-2.56477	-0.54892		0		-1.05152	0.683087		0.0956707	0.0235726		-0.43959	0.00058492		0.865369	0.221519
Q9Y679|AUP1_HUMAN Ancient ubiquitous protein 1 OS=Homo sapiens OX=9606 GN=AUP1 PE=1 SV=2	Q9Y679	AUP1		0	0.213621	-0.0246496	0.104351	-0.0478205	0					0	0.0252289	0.0201731	-0.14924	0.0908283							0		0.119425	0.683087		-0.0022383	0.00427739		-0.0224446	0.00058492		0.0215039	0.0456038
O43488|ARK72_HUMAN Aflatoxin B1 aldehyde reductase member 2 OS=Homo sapiens OX=9606 GN=AKR7A2 PE=1 SV=3	O43488	AKR7A2		0	0.0262316	-0.0605254	-0.0230353	-0.0155794	0	-0.0230747	0.00269331	-0.137822	0.124054	0	0.0856385	-0.0656582	0.110946	0.0377846	0	0.322654	0.10966	0.257951	0.273934		0		0.102862	0.683087		-0.00345744	0.00794901		0.0520099	0.00058492		0.105048	0.348251
E7EUA0|E7EUA0_HUMAN Nexilin (Fragment) OS=Homo sapiens OX=9606 GN=NEXN PE=1 SV=1	E7EUA0	NEXN		0	-0.363834	0.139847	-0.849971	-0.391719	0	0	0	0	0	0	-0.0857773	0.197841	-0.135132	0.0566265	0	0	0	0	0		0		-0.112403	0.683087		0.084422	0.222846		-0.246276	0.00058492		-0.0837731	0.158188
Q9HB71|CYBP_HUMAN Calcyclin-binding protein OS=Homo sapiens OX=9606 GN=CACYBP PE=1 SV=2	Q9HB71	CACYBP		0	0.01086	-0.180656	-0.0952508	-0.0296503	0	-0.295601	-0.00227732	-0.312577	0.062735	0	0.103026	-0.0104185	0.205041	0.123065	0	-0.437335	0.15217	0.0506714	0.281795		0		-0.154762	0.683087		-0.0102954	0.019673		-0.0380289	0.00058492		0.109486	0.357104
Q96QF0|RAB3I_HUMAN Rab-3A-interacting protein OS=Homo sapiens OX=9606 GN=RAB3IP PE=1 SV=1	Q96QF0	RAB3IP		0	-0.0192314	0.657275	0.00128421	0.30022	0	0.0572455	0.0812709	0.554689	-1.58727	0	0.665463	0.692882	0.221259	0.181073	0	0.055293	-0.133051	0.130538	0.0173769		0		0.189692	0.683087		0.324594	0.242179		0.226943	0.0300246		-0.27215	0.115877
O96033|MOC2A_HUMAN Molybdopterin synthase sulfur carrier subunit OS=Homo sapiens OX=9606 GN=MOCS2 PE=1 SV=1	O96033	MOCS2		0	-0.000183663	0.0319501	-0.0817533	-0.0776651	0	0.156631	0.0531006	0.038536	0.0280884	0	-0.0424412	-0.0792175	0.136354	0.0328447	0	0.309719	-0.063993	0.224706	-0.0550781		0		0.105931	0.683087		-0.0145399	0.0425938		0.0794607	0.00058492		-0.0179525	0.0680906
Q86TX2|ACOT1_HUMAN Acyl-coenzyme A thioesterase 1 OS=Homo sapiens OX=9606 GN=ACOT1 PE=1 SV=1	Q86TX2	ACOT1		0	0.12615	0.208313	0.137211	0.139173	0	-0.0927472	0.0225215	-0.281993	0.0289648	0	0.130949	-0.0069361	0.19614	0.0616389	0	0.188539	0.138822	0.166931	0.0977079		0		0.0882227	0.683087		0.0906799	0.238742		0.0545723	0.00058492		0.0818711	0.486793
M0R0P8|M0R0P8_HUMAN Unconventional myosin-IXb OS=Homo sapiens OX=9606 GN=MYO9B PE=1 SV=1	M0R0P8	MYO9B		0	0.814421	0.107613	-0.60705	-0.457722	0	0	0	0	0	0	0.103753	0.270177	-0.0152102	0.0456008	0	0	0	0	0		0		0.229543	0.683087		0.0944475	0.20896		-0.155565	0.00058492		-0.10303	0.179647
Q15642|CIP4_HUMAN Cdc42-interacting protein 4 OS=Homo sapiens OX=9606 GN=TRIP10 PE=1 SV=3	Q15642	TRIP10		0	-0.0824766	-0.143287	-0.0430079	-0.057908	0	0.399798	0.0756131	0.449769	0.244353	0	-0.0170986	-0.0509334	0.0596128	0.0751933	0	0.259621	-0.126855	0.121457	0.209863		0		0.139961	0.683087		-0.0613656	0.161718		0.146958	0.00058492		0.117875	0.370905
P21291|CSRP1_HUMAN Cysteine and glycine-rich protein 1 OS=Homo sapiens OX=9606 GN=CSRP1 PE=1 SV=3	P21291	CSRP1		0	-0.189286	-0.392506	-0.331688	-0.270447	0	0.121063	0.481133	-0.453404	-0.291968	0	0.237724	0.242333	0.296443	0.364781	0	0.621045	0.171376	0.589648	0.756092		0		0.197636	0.683087		0.125584	0.0876936		0.0252497	0.00058492		0.139615	0.0979163
Q15746|MYLK_HUMAN Myosin light chain kinase;smooth muscle OS=Homo sapiens OX=9606 GN=MYLK PE=1 SV=4	Q15746	MYLK		0	0.0470573	-0.217395	-0.0729861	-0.117088	0	-0.00267316	0.17165	-0.716803	-0.325399	0	0.0337544	0.0984528	0.170749	0.0879685	0	0.447051	-0.0197134	0.36149	0.278395		0		0.131297	0.683087		0.00824884	0.0117071		-0.0643875	0.00058492		-0.019031	0.0191708
Q5TCU3|Q5TCU3_HUMAN Tropomyosin beta chain OS=Homo sapiens OX=9606 GN=TPM2 PE=1 SV=1	Q5TCU3	TPM2		0	1.04369	0.60932	1.60896	0.843073	0	0	0	0	0	0	0.121591	0.00707575	-0.202891	0.0337243	0	0	0	0	0		0		0.29132	0.683087		0.154099	0.151847		0.351518	0.00058492		0.219199	0.235837
Q96CM8|ACSF2_HUMAN Acyl-CoA synthetase family member 2;mitochondrial OS=Homo sapiens OX=9606 GN=ACSF2 PE=1 SV=2	Q96CM8	ACSF2		0	0.325867	0.285792	0.322127	0.304835	0	0.0390965	0.140281	-0.169414	0.119519	0	0.293794	0.223365	0.131728	0.125753	0	-0.126763	-0.0115893	-0.164255	0.206777		0		0.132999	0.683087		0.159462	0.388216		0.0300466	0.00058492		0.189221	0.817797
P03891|NU2M_HUMAN NADH-ubiquinone oxidoreductase chain 2 OS=Homo sapiens OX=9606 GN=MT-ND2 PE=1 SV=2	P03891	MT-ND2		0	0.237313	0.0193056	0.325598	-0.451126	0	0.0990727	0.499309	0.11364	0.462133	0	-0.672091	-0.330573	-0.209718	0.0551443	0	-1.31266	-0.75298	-0.517742	0.164772		0		-0.412091	0.683087		-0.141235	0.0698257		-0.0720556	0.00058492		0.0577309	0.0469063
H0YKD8|H0YKD8_HUMAN 60S ribosomal protein L28 OS=Homo sapiens OX=9606 GN=RPL28 PE=1 SV=1	H0YKD8	RPL28		0	-0.134344	-0.142584	-0.0912803	-0.0341077	0	-0.605345	0.00286387	-0.191301	0.133119	0	-0.0720083	-0.216219	0.0278421	0.0124278	0	0.0986045	0.171728	-0.0196491	0.410264		0		-0.178273	0.683087		-0.0460528	0.0674099		-0.0685972	0.00058492		0.130426	0.292239
P49247|RPIA_HUMAN Ribose-5-phosphate isomerase OS=Homo sapiens OX=9606 GN=RPIA PE=1 SV=3	P49247	RPIA		0	-0.035285	0.289875	-0.191469	-0.0577506	0	0.00576015	-0.0572686	-0.156302	0.120066	0	0.118179	0.337191	0.149941	0.249121	0	0.442966	0.107438	0.4012	0.467883		0		0.132905	0.683087		0.169309	0.249067		0.0508426	0.00058492		0.19483	0.408641
Q15370|ELOB_HUMAN Elongin-B OS=Homo sapiens OX=9606 GN=ELOB PE=1 SV=1	Q15370	ELOB		0	0.209926	0.214165	0.274538	0.185436	0	0.385377	0.318416	0.38941	0.704375	0	-0.29952	-0.175336	-0.244378	-0.0219166	0	0.577515	0.516051	0.407913	0.776123		0		0.218324	0.683087		0.218324	0.231848		0.206871	0.00058492		0.411004	0.503036
Q3ZCM7|TBB8_HUMAN Tubulin beta-8 chain OS=Homo sapiens OX=9606 GN=TUBB8 PE=1 SV=2	Q3ZCM7	TUBB8		0	-0.233366	-0.548039	-0.511759	-0.50489	0	0	0	0	0	0	-0.0915375	-0.0897263	0.192775	0.0358799	0	0	0	0	0		0		-0.0812259	0.683087		-0.159441	0.181718		-0.0797459	0.00058492		-0.117253	0.190056
P56199|ITA1_HUMAN Integrin alpha-1 OS=Homo sapiens OX=9606 GN=ITGA1 PE=1 SV=2	P56199	ITGA1		0	0.0172055	0.00706906	-0.15958	-0.0195704	0	0.0133211	0.0435873	-0.18499	-0.0370567	0	0.058462	0.111468	0.0886281	0.0497558	0	0.195791	-0.00656	0.212859	0.0870387		0		0.0711949	0.683087		0.0388911	0.141986		-0.0107707	0.00058492		0.0200419	0.0754585
O43795|MYO1B_HUMAN Unconventional myosin-Ib OS=Homo sapiens OX=9606 GN=MYO1B PE=1 SV=3	O43795	MYO1B		0	0.133125	0.377111	0.10845	0.65358	0					0	0.0569613	-0.117577	-0.693235	-0.0689821							0		0.0950429	0.683087		0.129767	0.0983647		-0.292393	0.00058492		0.292299	0.258959
F8VYN9|F8VYN9_HUMAN ADP-ribosylation factor-like protein 1 OS=Homo sapiens OX=9606 GN=ARL1 PE=1 SV=1	F8VYN9	ARL1		0	-0.0644631	0.0100517	-0.0682399	0.0116649	0	-0.145348	0.0743296	-0.198286	0.16899	0	0.00459005	0.00162551	0.00521841	0.05208	0	-0.0474982	-0.0123239	-0.110547	-0.0170585		0		-0.0631799	0.683087		0.0184207	0.0664		-0.0929637	0.00058492		0.0539191	0.230246
B7ZKJ8|B7ZKJ8_HUMAN ITIH4 protein OS=Homo sapiens OX=9606 GN=ITIH4 PE=1 SV=1	B7ZKJ8	ITIH4		0	0.085864	0.341332	-0.00623569	0.372687	0	-0.166204	-0.342074	-0.422682	-0.227903	0	0.581897	0.628173	0.279725	0.494174	0	0.23244	-0.217133	0.205285	0.314918		0		0.183499	0.683087		0.102574	0.0592706		0.0140232	0.00058492		0.238469	0.347453
A5A3E0|POTEF_HUMAN POTE ankyrin domain family member F OS=Homo sapiens OX=9606 GN=POTEF PE=1 SV=2	A5A3E0	POTEF		0	0.178585	-0.0715822	-0.0451822	0.104578	0	0	0	0	0	0	0.110401	0.0272143	0.134476	0.353015	0	0	0	0	0		0		0.0722465	0.683087		-0.011092	0.0389465		0.0223235	0.00058492		0.114398	0.299172
Q7Z6Z7|HUWE1_HUMAN E3 ubiquitin-protein ligase HUWE1 OS=Homo sapiens OX=9606 GN=HUWE1 PE=1 SV=3	Q7Z6Z7	HUWE1		0	0.00673683	0.0273889	-0.108836	-0.0826175	0	-0.0438805	-0.0605829	-0.158399	0.125124	0	0.136631	0.0226815	0.110292	0.110099	0	0.340453	0.0523296	0.186727	0.125632		0		0.109985	0.683087		0.0104543	0.0337411		0.00744591	0.00058492		0.0695593	0.264434
P84095|RHOG_HUMAN Rho-related GTP-binding protein RhoG OS=Homo sapiens OX=9606 GN=RHOG PE=1 SV=1	P84095	RHOG		0	0.120495	0.00783958	0.112408	0.0522359	0					0	0.064651	0.00481807	0.261072	0.186883							0		0.0925732	0.683087		0.00632882	0.0161568		0.18674	0.0135242		0.11956	0.374368
P26599|PTBP1_HUMAN Polypyrimidine tract-binding protein 1 OS=Homo sapiens OX=9606 GN=PTBP1 PE=1 SV=1	P26599	PTBP1		0	-0.128564	-0.00458534	-0.00102352	-0.0738757	0	0.197668	0.179683	0.0967504	0.148061	0	0.075107	0.101072	0.223374	0.219124	0	0.37745	0.150653	0.158133	0.34102		0		0.130415	0.683087		0.106706	0.332184		0.119309	0.00795531		0.158582	0.414432
Q8TBC4|UBA3_HUMAN NEDD8-activating enzyme E1 catalytic subunit OS=Homo sapiens OX=9606 GN=UBA3 PE=1 SV=2	Q8TBC4	UBA3		0	-0.0702043	-0.0870103	-0.268374	-0.179481	0	0.0736694	-0.0449405	-0.222243	0.164303	0	0.0946835	-0.0470805	0.04171	0.0856209	0	0.322632	0.0069958	0.110667	0.0727106		0		0.105195	0.683087		-0.0430089	0.181502		-0.0845599	0.00058492		0.0357884	0.0722379
Q15363|TMED2_HUMAN Transmembrane emp24 domain-containing protein 2 OS=Homo sapiens OX=9606 GN=TMED2 PE=1 SV=1	Q15363	TMED2		0	-0.103922	-0.20894	-0.739859	-0.279449	0	0.327183	0.19449	0.215998	0.48798	0	-0.0312019	-0.018061	0.569444	0.833006	0	0.446534	0.519222	0.233606	0.664989		0		0.159648	0.683087		0.121678	0.107438		0.0697971	0.00058492		0.426632	0.419973
P56378|68MP_HUMAN 6.8 kDa mitochondrial proteolipid OS=Homo sapiens OX=9606 GN=MP68 PE=1 SV=1	P56378	MP68		0	0.0363732	0.447409	0.121381	0.0144909	0	0.480821	0.474244	0.382022	0.75134	0	-0.196241	0.0368959	-0.165319	0.0156556	0	0.431894	0.374516	0.364411	0.908798		0		0.188212	0.683087		0.333266	0.574077		0.175624	0.00058492		0.422571	0.42784
P05026|AT1B1_HUMAN Sodium/potassium-transporting ATPase subunit beta-1 OS=Homo sapiens OX=9606 GN=ATP1B1 PE=1 SV=1	P05026	ATP1B1		0	0.138662	-0.0290353	-0.00498533	-0.0919726	0	-0.168805	-0.23197	-0.241225	0.0229146	0	-0.0890603	-0.113498	0.0589888	-0.0290344	0	-0.708455	-0.291793	-0.621609	-0.104033		0		-0.206915	0.683087		-0.166574	0.431938		-0.202208	0.00058492		-0.0505313	0.261797
P78417|GSTO1_HUMAN Glutathione S-transferase omega-1 OS=Homo sapiens OX=9606 GN=GSTO1 PE=1 SV=2	P78417	GSTO1		0	0.172045	0.123748	0.127509	0.101049	0	-0.0824387	0.175426	0.234522	-0.92439	0	-0.233185	0.0615874	-0.529107	-0.0784673	0	-0.958204	0.38704	0.59027	0.297317		0		-0.275446	0.683087		0.18695	0.415543		0.105798	0.00058492		-0.151123	0.102671
Q04828|AK1C1_HUMAN Aldo-keto reductase family 1 member C1 OS=Homo sapiens OX=9606 GN=AKR1C1 PE=1 SV=1	Q04828	AKR1C1		0	-0.183846	-0.165382	-0.178125	-0.00510887	0	0.449654	0.114993	0.21187	-0.064359	0	0.0340201	-0.170135	0.05355	0.0142423	0	0.414192	-0.168128	0.163479	-0.264647		0		0.178505	0.683087		-0.0971629	0.199175		0.0626934	0.00058492		-0.0799681	0.257891
Q9NYU2|UGGG1_HUMAN UDP-glucose:glycoprotein glucosyltransferase 1 OS=Homo sapiens OX=9606 GN=UGGT1 PE=1 SV=3	Q9NYU2	UGGT1		0	-0.0871175	-0.111703	-0.0701644	-0.0137808	0	0.11971	-0.196159	-0.331252	-0.0215512	0	0.0838239	-0.0362891	0.136892	0.21495	0	0.280569	0.112775	0.181544	0.178949		0		0.0992463	0.683087		-0.057844	0.113722		-0.0207449	0.00058492		0.0896418	0.298689
Q86UT6|NLRX1_HUMAN NLR family member X1 OS=Homo sapiens OX=9606 GN=NLRX1 PE=1 SV=1	Q86UT6	NLRX1		0	0.156433	0.115114	0.232306	0.19108	0	0.0717252	0.13464	-0.0326113	0.157988	0	0.171071	-0.01345	0.0541913	0.151296	0	-0.0735931	-0.0577198	-0.00376856	0.316714		0		0.0814092	0.683087		0.0446461	0.109064		0.0625294	0.00058492		0.204269	0.900496
Q9Y376|CAB39_HUMAN Calcium-binding protein 39 OS=Homo sapiens OX=9606 GN=CAB39 PE=1 SV=1	Q9Y376	CAB39		0	-0.0267008	-0.0154433	-0.0666824	-0.0513459	0	0.0416486	0.0449584	0.303489	-0.987242	0	-0.112337	-0.0427701	0.0865826	0.180614	0	-0.855931	-0.0989734	-1.00022	-0.0506805		0		-0.23833	0.683087		-0.0280571	0.0855426		-0.169207	0.00058492		-0.227164	0.187481
O75533|SF3B1_HUMAN Splicing factor 3B subunit 1 OS=Homo sapiens OX=9606 GN=SF3B1 PE=1 SV=3	O75533	SF3B1		0	0.166671	0.093882	0.0801516	0.117573	0	-0.0280592	-0.172975	-0.351524	0.0355335	0	-0.0378946	0.00509729	-0.0532558	-0.0221634	0	0.458825	0.229713	0.37776	0.228486		0		0.139886	0.683087		0.0389291	0.0590431		0.0132828	0.00058492		0.0898575	0.333864
P37837|TALDO_HUMAN Transaldolase OS=Homo sapiens OX=9606 GN=TALDO1 PE=1 SV=2	P37837	TALDO1		0	-0.0793271	0.120398	-0.129081	-0.0601413	0	0.06661	-0.172333	-0.207565	-0.193874	0	0.189841	0.205197	0.0622514	0.0854452	0	0.168133	-0.0737597	0.385544	0.0221758		0		0.0863142	0.683087		0.0198753	0.0284203		0.0277874	0.00058492		-0.0365986	0.0957416
Q93034|CUL5_HUMAN Cullin-5 OS=Homo sapiens OX=9606 GN=CUL5 PE=1 SV=4	Q93034	CUL5		0	0.0126171	0.0221919	0.0613666	0.034727	0	0.156821	-0.0371948	-0.135125	-0.0784368	0	-0.0528627	-0.0569619	-0.0313388	0.040373	0	0.268564	0.113989	0.00312433	0.0631305		0		0.0962848	0.683087		0.010506	0.0284107		-0.0254931	0.00058492		0.0149484	0.0513422
Q9NQP4|PFD4_HUMAN Prefoldin subunit 4 OS=Homo sapiens OX=9606 GN=PFDN4 PE=1 SV=1	Q9NQP4	PFDN4		0	0.0242781	-0.156016	-0.0502783	-0.0210266	0	-0.116584	-0.120711	-0.283478	0.0828326	0	0.00602718	-0.207117	-0.0312463	0.109406	0	-0.357075	0.389474	0.174628	0.298233		0		-0.110839	0.683087		-0.0235926	0.0231889		-0.0475937	0.00058492		0.117361	0.380945
Q9BZK3|NACP1_HUMAN Putative nascent polypeptide-associated complex subunit alpha-like protein OS=Homo sapiens OX=9606 GN=NACAP1 PE=5 SV=1	Q9BZK3	NACAP1		0	-0.00735517	-0.304946	-0.149465	-0.598364	0					0	-0.253214	-0.690322	-0.0995551	-0.336197							0		-0.130285	0.683087		-0.497634	0.515643		-0.12451	0.00058492		-0.467281	0.821064
Q9H2U2|IPYR2_HUMAN Inorganic pyrophosphatase 2;mitochondrial OS=Homo sapiens OX=9606 GN=PPA2 PE=1 SV=2	Q9H2U2	PPA2		0	0.104879	-0.0140542	0.326769	-0.315771	0	0.0283231	-0.140087	-0.199844	-0.0192151	0	-0.329631	0.0558324	0.220622	0.248128	0	-1.96865	-0.424628	-0.167584	-0.233822		0		-0.54127	0.683087		-0.130734	0.181718		0.0449907	0.00058492		-0.0801701	0.115877
Q92995|UBP13_HUMAN Ubiquitin carboxyl-terminal hydrolase 13 OS=Homo sapiens OX=9606 GN=USP13 PE=1 SV=2	Q92995	USP13		0	-0.120139	-0.106241	-0.191137	-0.218956	0	0.2842	0.0676396	0.110322	0.171727	0	-0.0149927	0.0137111	0.0760484	0.104313	0	0.605674	-0.139693	0.447842	0.274617		0		0.188686	0.683087		-0.0411458	0.0955965		0.110769	0.00058492		0.0829253	0.151306
Q96B36|AKTS1_HUMAN Proline-rich AKT1 substrate 1 OS=Homo sapiens OX=9606 GN=AKT1S1 PE=1 SV=1	Q96B36	AKT1S1		0	0.202481	-0.0128385	0.0836849	0.150787	0	-0.18605	-0.0532501	-0.298068	0.0513813	0	0.159707	-0.167166	0.0492112	0.13585	0	0.413801	0.176903	0.109655	0.139853		0		0.147485	0.683087		-0.0140878	0.0235726		-0.0138792	0.00058492		0.119468	0.707884
Q99613|EIF3C_HUMAN Eukaryotic translation initiation factor 3 subunit C OS=Homo sapiens OX=9606 GN=EIF3C PE=1 SV=1	Q99613	EIF3C		0	0.00650923	0.0223272	-0.102115	-0.0589196	0	-0.0220321	0.00696472	-0.10528	0.139444	0	0.1012	0.0590539	0.0850315	0.142465	0	0.281432	0.14305	0.115937	0.192244		0		0.0917774	0.683087		0.0578489	0.208546		-0.00160659	0.000152682		0.103809	0.386931
O75477|ERLN1_HUMAN Erlin-1 OS=Homo sapiens OX=9606 GN=ERLIN1 PE=1 SV=1	O75477	ERLIN1		0	-0.0412461	-0.164772	-0.144639	-0.184153	0	-0.0339098	0.125425	-0.0695142	0.353305	0	0.180752	0.315835	0.263201	0.335371	0	0.418382	0.196409	0.366307	0.310371		0		0.130995	0.683087		0.118224	0.170983		0.103839	0.00058492		0.203723	0.367452
O00410|IPO5_HUMAN Importin-5 OS=Homo sapiens OX=9606 GN=IPO5 PE=1 SV=4	O00410	IPO5		0	-0.0364143	0.00153417	-0.231447	-0.138388	0	0.0136954	0.00206333	-0.0803167	0.101639	0	0.11908	0.00344635	0.0768893	0.057152	0	0.262032	0.0449333	0.0980872	-0.0127175		0		0.0895983	0.683087		0.0129943	0.0537563		-0.0341968	0.00058492		0.0019214	0.00331137
P26447|S10A4_HUMAN Protein S100-A4 OS=Homo sapiens OX=9606 GN=S100A4 PE=1 SV=1	P26447	S100A4		0	-1.16772	-0.293077	-1.28211	-0.646623	0	0.0923539	-0.572795	-0.318491	-1.01616	0	0.444489	1.03992	1.12319	-0.0623416	0	-1.41384	0.34201	0.727711	0.00847686		0		-0.511178	0.683087		0.129016	0.0491795		0.0625736	0.00058492		-0.429163	0.424772
Q96AN5|TM143_HUMAN Transmembrane protein 143 OS=Homo sapiens OX=9606 GN=TMEM143 PE=2 SV=1	Q96AN5	TMEM143		0	0.195592	0.200255	0.278288	0.227415	0	-0.140944	-0.252074	-0.136772	1.67425	0	0.0821296	-0.222838	0.123067	0.103037	0	0.423861	0.109172	0.116571	0.342653		0		0.14016	0.683087		-0.041371	0.0472263		0.0952884	0.00058492		0.586839	0.386931
P11182|ODB2_HUMAN Lipoamide acyltransferase component of branched-chain alpha-keto acid dehydrogenase complex;mitochondrial OS=Homo sapiens OX=9606 GN=DBT PE=1 SV=3	P11182	DBT		0	0.017839	0.181235	0.0395497	0.0880125	0	-0.00297295	-0.0505181	-0.150705	0.0996794	0	-0.110746	0.015928	-0.132992	0.0682824	0	-0.966712	-0.287352	-1.0587	-0.0535639		0		-0.265648	0.683087		-0.0351767	0.0462867		-0.325712	0.00058492		0.0506026	0.235837
O60825|F262_HUMAN 6-phosphofructo-2-kinase/fructose-2;6-bisphosphatase 2 OS=Homo sapiens OX=9606 GN=PFKFB2 PE=1 SV=2	O60825	PFKFB2		0	0.201986	0.202053	0.293844	0.0999522	0	0	0	0	0	0	0.0942712	0.0567844	0.036233	0.222269	0	0	0	0	0		0		0.0740644	0.683087		0.0647094	0.175845		0.0825193	0.00058492		0.0805552	0.302242
Q14687|GSE1_HUMAN Genetic suppressor element 1 OS=Homo sapiens OX=9606 GN=GSE1 PE=1 SV=3	Q14687	GSE1		0	0.00153589	0.468942	0.817371	0.743517	0					0	-0.282439	-0.265297	-0.0748208	-0.0991196							0		-0.140452	0.683087		0.101822	0.0556469		0.371275	0.00058492		0.322199	0.243926
Q9H4A4|AMPB_HUMAN Aminopeptidase B OS=Homo sapiens OX=9606 GN=RNPEP PE=1 SV=2	Q9H4A4	RNPEP		0	0.0598742	-0.00430066	0.0190546	-0.028893	0	-0.0152622	-0.0504045	-0.333046	0.107594	0	0.025931	-0.099214	0.110278	0.102655	0	0.354352	0.097755	0.282425	0.182678		0		0.106224	0.683087		-0.014041	0.0355446		0.0196778	0.00058492		0.0910085	0.396457
A0A1B0GWJ6|A0A1B0GWJ6_HUMAN Unconventional myosin-XVIIIa (Fragment) OS=Homo sapiens OX=9606 GN=MYO18A PE=1 SV=1	A0A1B0GWJ6	MYO18A		0	0.0286115	0.142523	0.164988	-0.0244201	0	0.292768	-0.0846825	-0.324913	0.0342329	0	-0.118967	-0.161704	-0.117221	-0.133464	0	0.294224	0.0984409	0.21196	-0.152058		0		0.124159	0.683087		-0.00135585	0.00174999		-0.0162965	0.00058492		-0.0689272	0.292146
Q9Y6M9|NDUB9_HUMAN NADH dehydrogenase [ubiquinone] 1 beta subcomplex subunit 9 OS=Homo sapiens OX=9606 GN=NDUFB9 PE=1 SV=3	Q9Y6M9	NDUFB9		0	0.176769	-0.0113581	0.0740578	0.0556235	0	0.0554564	0.151199	-0.123547	0.22662	0	0.233166	-0.0750379	0.136729	0.0616337	0	-0.0888131	-0.0650294	-0.0708305	0.175274		0		0.0941446	0.683087		-5.66e-05	0.000353217		0.00410243	0.00058492		0.129788	0.597864
O96000|NDUBA_HUMAN NADH dehydrogenase [ubiquinone] 1 beta subcomplex subunit 10 OS=Homo sapiens OX=9606 GN=NDUFB10 PE=1 SV=3	O96000	NDUFB10		0	0.352098	0.0354304	0.297915	0.0339469	0	0.144705	-0.0649361	-0.217207	-0.0539288	0	-0.0800013	-0.151792	0.00612416	-0.0597002	0	0.0376263	-0.0924866	-0.0400417	0.176316		0		0.113607	0.683087		-0.068446	0.212471		0.0116975	0.00058492		0.0241585	0.0629498
Q9BSK4|FEM1A_HUMAN Protein fem-1 homolog A OS=Homo sapiens OX=9606 GN=FEM1A PE=1 SV=1	Q9BSK4	FEM1A		0	0.0375352	0.144956	0.161471	0.242858	0	0.151722	0.235317	-0.104049	0.338586	0	-0.0935076	-0.0856375	-0.0878023	-0.041477	0	0.689187	0.277546	0.461563	0.321631		0		0.196234	0.683087		0.143045	0.24524		0.107796	0.00058492		0.215399	0.575382
Q9UI12|VATH_HUMAN V-type proton ATPase subunit H OS=Homo sapiens OX=9606 GN=ATP6V1H PE=1 SV=1	Q9UI12	ATP6V1H		0	-0.0654552	0.100878	-0.146826	0.0298114	0	0.0195797	0.018621	-0.164347	0.089818	0	0.207106	0.168616	0.0431107	0.141817	0	0.200135	0.0281103	0.0938434	-0.00903871		0		0.0903415	0.683087		0.0790562	0.24524		-0.0435547	0.00058492		0.0631019	0.317431
H7C4C5|H7C4C5_HUMAN Microtubule-associated protein (Fragment) OS=Homo sapiens OX=9606 GN=MAP4 PE=1 SV=1	H7C4C5	MAP4		0	-0.126457	-0.262599	-0.202696	-0.162341	0	0	0	0	0	0	-0.139017	-0.121718	0.114239	0.0493646	0	0	0	0	0		0		-0.0663686	0.683087		-0.0960792	0.214196		-0.0221142	0.00058492		-0.028244	0.0874556
P15954|COX7C_HUMAN Cytochrome c oxidase subunit 7C;mitochondrial OS=Homo sapiens OX=9606 GN=COX7C PE=1 SV=1	P15954	COX7C		0	0.369074	0.0994672	0.461181	0.160731	0	0.0422112	-0.175132	-0.296769	-0.0929519	0	-0.133449	-0.162029	0.0309707	-0.203905	0	0.254978	-0.146644	0.315384	-0.0989563		0		0.133204	0.683087		-0.0960843	0.20896		0.127692	0.00058492		-0.0587706	0.139624
Q9BYD6|RM01_HUMAN 39S ribosomal protein L1;mitochondrial OS=Homo sapiens OX=9606 GN=MRPL1 PE=1 SV=2	Q9BYD6	MRPL1		0	0.0968099	-0.0493738	-0.0406901	-0.026381	0	-0.0253235	-0.0780557	-0.218194	0.106697	0	0.0988685	0.0354246	0.0814347	0.0898213	0	0.0721127	-0.0399091	0.0399042	0.107438		0		0.0606169	0.683087		-0.0329785	0.12372		-0.0343863	0.00058492		0.0693938	0.358433
Q6P2Q9|PRP8_HUMAN Pre-mRNA-processing-splicing factor 8 OS=Homo sapiens OX=9606 GN=PRPF8 PE=1 SV=2	Q6P2Q9	PRPF8		0	0.0381969	0.000876323	0.0328887	0.121249	0	0.0219649	-0.00789811	-0.219792	0.0972898	0	0.0108446	-0.103547	-0.0619966	-0.0411392	0	0.703868	0.450548	0.717837	0.125298		0		0.193719	0.683087		0.0849948	0.0870045		0.117234	0.00058492		0.0756745	0.347453
Q9BYK1|Q9BYK1_HUMAN 40S ribosomal protein S21 OS=Homo sapiens OX=9606 GN=RPS21 PE=1 SV=1	Q9BYK1	RPS21		0	0.0226075	-0.0433745	-0.105517	-0.0367365	0	0.00666107	-0.103977	-0.255032	-0.000332568	0	0.0408774	0.0802622	0.100854	0.119508	0	0.282073	0.161757	0.307573	0.15728		0		0.0880547	0.683087		0.0236668	0.0472263		0.0119695	0.00058492		0.0599297	0.236125
Q3ZCQ8|TIM50_HUMAN Mitochondrial import inner membrane translocase subunit TIM50 OS=Homo sapiens OX=9606 GN=TIMM50 PE=1 SV=2	Q3ZCQ8	TIMM50		0	0.259295	0.298866	0.366779	0.255981	0	-0.0730134	-0.110568	-0.271864	0.0875671	0	0.00673896	-0.179978	-0.261327	-0.0638382	0	0.216014	0.110272	0.149438	0.286423		0		0.102259	0.683087		0.0296479	0.0343547		-0.00424373	0.00019647		0.141533	0.387941
P35580|MYH10_HUMAN Myosin-10 OS=Homo sapiens OX=9606 GN=MYH10 PE=1 SV=3	P35580	MYH10		0	0.00665379	-0.17002	-0.0973916	-0.160626	0	-0.0730609	-0.116081	-0.365844	0.198497	0	0.159046	0.0330812	0.0211342	-0.0324705	0	0.543629	0.182821	0.156382	0.142372		0		0.159067	0.683087		-0.0175496	0.0279567		-0.0714299	0.00058492		0.0369431	0.0693129
Q96QR8|PURB_HUMAN Transcriptional activator protein Pur-beta OS=Homo sapiens OX=9606 GN=PURB PE=1 SV=3	Q96QR8	PURB		0	0.167561	0.53762	0.430988	0.423937	0	0.0912529	-0.175303	-0.201668	0.0215341	0	-0.142708	-0.302902	-0.450532	-0.0722642	0	0.52663	0.0365558	0.473456	0.138439		0		0.160684	0.683087		0.0239926	0.0176436		0.0630612	0.00058492		0.127911	0.262255
P26639|SYTC_HUMAN Threonine--tRNA ligase;cytoplasmic OS=Homo sapiens OX=9606 GN=TARS PE=1 SV=3	P26639	TARS		0	0.0907482	-0.13745	-0.111738	-0.173921	0	-0.0695389	-0.0463461	-0.129779	0.186353	0	0.1189	-0.0645129	0.177131	0.111089	0	0.159703	-0.105184	0.166528	0.0303326		0		0.0749529	0.683087		-0.0883732	0.399889		0.0255355	0.00058492		0.0384632	0.0767192
Q13596|SNX1_HUMAN Sorting nexin-1 OS=Homo sapiens OX=9606 GN=SNX1 PE=1 SV=3	Q13596	SNX1							0	0.0406824	-0.117218	-0.0944892	0.0895446						0	0.269935	-0.150394	0.218189	0.0299817		0		0.155309	0.683087		-0.133806	0.24841		0.0618502	0.00058492		0.0597632	0.16224
Q08495|DEMA_HUMAN Dematin OS=Homo sapiens OX=9606 GN=DMTN PE=1 SV=3	Q08495	DMTN		0	0.070479	0.691154	0.0479003	0.43231	0	0	0	0	0	0	0.640092	0.919115	0.316197	0.366236	0	0	0	0	0		0		0.177643	0.683087		0.402567	0.247598		0.0910244	0.00058492		0.199636	0.400797
E7EQ64|E7EQ64_HUMAN Trypsin-1 OS=Homo sapiens OX=9606 GN=PRSS1 PE=1 SV=1	E7EQ64	PRSS1		0	-0.0862894	-0.389252	-0.579313	-0.335912	0					0	-0.0876521	-0.047025	0.110988	0.135203							0		-0.0869707	0.683087		-0.218138	0.243011		-0.234163	0.00058492		-0.100354	0.107836
Q9GZT8|NIF3L_HUMAN NIF3-like protein 1 OS=Homo sapiens OX=9606 GN=NIF3L1 PE=1 SV=2	Q9GZT8	NIF3L1		0	-0.00895971	0.115629	-0.0738361	-0.0104263	0	-0.0678139	-0.0752285	-0.199281	0.0382519	0	0.221779	0.189545	0.131784	0.0667887	0	0.27723	0.113688	0.133131	0.121575		0		0.105559	0.683087		0.0859085	0.20896		-0.00205041	0.000152682		0.0540472	0.292983
Q9Y512|SAM50_HUMAN Sorting and assembly machinery component 50 homolog OS=Homo sapiens OX=9606 GN=SAMM50 PE=1 SV=3	Q9Y512	SAMM50		0	0.16789	-0.00687732	0.144303	0.00499054	0	0.0102072	-0.0412039	-0.184621	-0.126039	0	0.0911154	-0.0637231	0.0599156	0.0334975	0	-0.00127636	-0.0528997	0.0322014	0.163723		0		0.066984	0.683087		-0.041176	0.18733		0.0129498	0.00058492		0.0190429	0.0427635
A0A087WUT6|A0A087WUT6_HUMAN Eukaryotic translation initiation factor 5B OS=Homo sapiens OX=9606 GN=EIF5B PE=1 SV=1	A0A087WUT6	EIF5B		0	-0.0755906	-0.0925167	-0.130539	-0.0497914	0	0.102855	0.0118795	-0.259324	0.0696526	0	0.0733459	-0.0971261	0.110749	0.140381	0	0.269971	-0.0118486	0.158036	0.229839		0		0.0926453	0.683087		-0.047403	0.173572		-0.0302693	0.00058492		0.0975202	0.341913
Q14118|DAG1_HUMAN Dystroglycan OS=Homo sapiens OX=9606 GN=DAG1 PE=1 SV=2	Q14118	DAG1		0	-0.0579719	0.0306634	-0.08758	-0.122131	0	0.00134979	-0.049538	-0.018162	-0.136846	0	-0.0121599	-0.0341237	0.138719	-0.00778369	0	-0.652974	-0.138464	-0.569776	-0.0944722		0		-0.180439	0.683087		-0.0478656	0.154128		-0.1342	0.00058492		-0.0903083	0.503036
P20073|ANXA7_HUMAN Annexin A7 OS=Homo sapiens OX=9606 GN=ANXA7 PE=1 SV=3	P20073	ANXA7		0	-0.000256229	-0.107854	-0.0194493	0.00254638	0	0.0569096	0.0427378	-0.266304	-0.216383	0	-0.138062	-0.25675	0.0147092	-0.0111338	0	-0.5126	0.0838259	-0.0134804	0.0920282		0		-0.148502	0.683087		-0.05951	0.095714		-0.0711311	0.00058492		-0.0332356	0.0763222
D6RAN1|D6RAN1_HUMAN PDZ and LIM domain protein 7 (Fragment) OS=Homo sapiens OX=9606 GN=PDLIM7 PE=1 SV=1	D6RAN1	PDLIM7		0	1.28764	2.45981	2.45076	4.8017	0	0	0	0	0	0	0.103012	-0.567812	-0.637334	1.06732	0	0	0	0	0		0		0.347663	0.683087		0.472999	0.0948151		0.453357	0.00058492		1.46726	0.301728
O95822|DCMC_HUMAN Malonyl-CoA decarboxylase;mitochondrial OS=Homo sapiens OX=9606 GN=MLYCD PE=1 SV=3	O95822	MLYCD		0	0.0395149	-0.111239	0.0711321	0.00854224	0	0.122323	0.156911	0.0947185	0.247608	0	0.191005	-0.0518099	0.159275	0.207578	0	-0.0486138	-0.159443	0.130651	0.4854		0		0.0760573	0.683087		-0.0413952	0.072022		0.113944	0.0735917		0.237282	0.577028
P49915|GUAA_HUMAN GMP synthase [glutamine-hydrolyzing] OS=Homo sapiens OX=9606 GN=GMPS PE=1 SV=1	P49915	GMPS		0	-0.146507	-0.151685	-0.391975	-0.286398	0	0.0420325	0.336412	0.264776	0.254076	0	0.0169091	-0.221744	0.047287	0.11603	0	-0.866648	0.32674	-1.31823	0.486237		0		-0.238553	0.683087		0.0724304	0.0645022		-0.349536	0.00058492		0.142486	0.185404
Q96SZ5|AEDO_HUMAN 2-aminoethanethiol dioxygenase OS=Homo sapiens OX=9606 GN=ADO PE=1 SV=2	Q96SZ5	ADO		0	-0.00415823	-0.0356515	-0.21294	-0.147009	0	-0.000148675	-0.0149935	-0.129457	0.095851	0	0.0778324	-0.072129	0.198651	0.117578	0	0.306129	0.0492718	0.120157	0.075368		0		0.0949137	0.683087		-0.0183755	0.0599261		-0.00589722	0.00058492		0.035447	0.0895279
P50570|DYN2_HUMAN Dynamin-2 OS=Homo sapiens OX=9606 GN=DNM2 PE=1 SV=2	P50570	DNM2		0	-0.0961909	-0.0342257	-0.308274	-0.187199	0	0.0160262	-0.176916	-0.344655	-0.121712	0	0.276473	0.467806	0.298555	0.365667	0	0.247977	-0.096417	0.223192	0.099358		0		0.111071	0.683087		0.040062	0.036043		-0.0327954	0.00058492		0.0390284	0.0469063
Q9HDC5|JPH1_HUMAN Junctophilin-1 OS=Homo sapiens OX=9606 GN=JPH1 PE=1 SV=2	Q9HDC5	JPH1		0	-0.19623	-0.0769103	-0.137208	-0.109884	0	-0.13619	-0.00820677	-0.14689	-0.0715926	0	-0.157531	-0.099952	0.0124664	0.0649373	0	0.117407	0.254042	0.064846	0.232276		0		-0.0931357	0.683087		0.0172432	0.0272		-0.0516964	0.00058492		0.0289341	0.0563633
P08621|RU17_HUMAN U1 small nuclear ribonucleoprotein 70 kDa OS=Homo sapiens OX=9606 GN=SNRNP70 PE=1 SV=2	P08621	SNRNP70		0	-0.214141	-0.128921	-0.273653	-0.229809	0	0.443217	-0.23648	-0.182342	0.117992	0	0.0523005	-0.0640193	0.119851	0.163918	0	0.460895	0.416215	0.638048	0.503167		0		0.185568	0.683087		-0.00330122	0.00204529		0.0754759	0.00058492		0.138817	0.19851
Q5T6W2|Q5T6W2_HUMAN Heterogeneous nuclear ribonucleoprotein K (Fragment) OS=Homo sapiens OX=9606 GN=HNRNPK PE=1 SV=1	Q5T6W2	HNRNPK							0	0.017466	-0.0944109	-0.176298	0.0669748						0	0.477691	0.0909795	0.353029	0.0233935		0		0.247578	0.683087		-0.00171571	0.00174999		0.0883657	0.00058492		0.0451841	0.115877
P12882|MYH1_HUMAN Myosin-1 OS=Homo sapiens OX=9606 GN=MYH1 PE=1 SV=3	P12882	MYH1		0	-0.404237	-0.193105	-0.761945	-0.170804	0	0.491014	0.606908	0.256248	0.454313	0	0.199741	0.585826	0.230606	0.412107	0	1.02397	2.07291	2.12478	0.940859		0		0.327621	0.683087		0.768134	0.244194		0.462423	0.00058492		0.409119	0.431337
Q5VW00|DC122_HUMAN DDB1- and CUL4-associated factor 12-like protein 2 OS=Homo sapiens OX=9606 GN=DCAF12L2 PE=2 SV=1	Q5VW00	DCAF12L2		0	0.229532	2.53785	0.338772	1.3131	0	-0.238886	-0.624532	-0.148291	-0.581036	0	2.58394	2.95323	1.26521	0.513906	0	0.209364	-0.105783	0.415249	0.325604		0		0.695987	0.683087		1.19019	0.208546		0.467734	0.00473085		0.392894	0.227368
J3KQ32|J3KQ32_HUMAN Obg-like ATPase 1 OS=Homo sapiens OX=9606 GN=OLA1 PE=1 SV=1	J3KQ32	OLA1		0	-0.0875631	-0.181867	-0.170364	-0.128072	0	0.17158	-0.245581	0.117976	-0.129182	0	-0.205095	-0.169572	-0.202124	0.0707334	0	-1.25096	-0.0954472	-0.244617	-0.0803039		0		-0.343009	0.683087		-0.173117	0.845119		-0.124783	0.00058492		-0.0667059	0.265369
Q14315|FLNC_HUMAN Filamin-C OS=Homo sapiens OX=9606 GN=FLNC PE=1 SV=3	Q14315	FLNC		0	-0.129143	-0.213245	-0.251075	-0.11293	0	-0.0584886	0.0327465	-0.00692232	-0.136539	0	-0.225506	-0.16219	-0.190894	-0.117655	0	0.0731816	-0.147999	-0.033265	-0.259756		0		-0.0849889	0.683087		-0.122672	0.295686		-0.120539	0.00338476		-0.15672	0.777759
P02100|HBE_HUMAN Hemoglobin subunit epsilon OS=Homo sapiens OX=9606 GN=HBE1 PE=1 SV=2	P02100	HBE1		0	0.133935	1.97197	-0.196488	0.397676	0	0	0	0	0	0	1.94796	2.3827	1.01066	0.487731	0	0	0	0	0		0		0.520474	0.683087		1.08867	0.24841		0.203543	0.00058492		0.221352	0.401049
Q9H9P8|L2HDH_HUMAN L-2-hydroxyglutarate dehydrogenase;mitochondrial OS=Homo sapiens OX=9606 GN=L2HGDH PE=1 SV=3	Q9H9P8	L2HGDH		0	0.174906	-0.0566412	0.197087	0.101005	0	0.378345	0.0380063	-0.186335	0.0297464	0	-0.0387903	-0.102839	0.0999433	0.130311	0	-0.0373621	-0.112252	0.089767	0.244886		0		0.119275	0.683087		-0.0584315	0.197321		0.0501155	0.00058492		0.126487	0.564806
P62854|RS26_HUMAN 40S ribosomal protein S26 OS=Homo sapiens OX=9606 GN=RPS26 PE=1 SV=3	P62854	RPS26		0	0.0463126	-0.0974568	-0.0221905	-0.093041	0	0.418494	0.0222149	0.213065	0.036783	0	-0.120149	-0.598696	-0.0231124	-0.116153	0	0.188438	0.105524	0.232077	0.00643444		0		0.133274	0.683087		-0.142103	0.136282		0.0999599	0.00058492		-0.0414942	0.177626
P17152|TMM11_HUMAN Transmembrane protein 11;mitochondrial OS=Homo sapiens OX=9606 GN=TMEM11 PE=1 SV=1	P17152	TMEM11		0	0.220669	-0.0122028	0.158409	-0.165683	0	-0.0641018	0.251411	0.300635	-1.10844	0	-0.304016	-0.227005	0.0181608	0.0841777	0	-1.40976	-0.369038	-0.346191	0.0514029		0		-0.389303	0.683087		-0.0892088	0.0855426		0.0327535	0.00058492		-0.284635	0.228548
Q9NZA1|CLIC5_HUMAN Chloride intracellular channel protein 5 OS=Homo sapiens OX=9606 GN=CLIC5 PE=1 SV=3	Q9NZA1	CLIC5		0	0.228754	0.0325858	0.176319	0.142331	0	0.142981	-0.17699	-0.37179	-0.1123	0	-0.196906	0.0926374	-0.327217	0.0692435	0	0.414646	0.0779726	0.0592348	0.0793263		0		0.147369	0.683087		0.00655132	0.0122557		-0.115863	0.00058492		0.0446502	0.139624
Q9H3H3|CK068_HUMAN UPF0696 protein C11orf68 OS=Homo sapiens OX=9606 GN=C11orf68 PE=1 SV=2	Q9H3H3	C11orf68		0	-0.117217	0.849526	-0.0620147	0.276329	0	0.0500836	0.0391312	-0.151157	0.307666	0	0.875154	1.08606	0.350637	0.24536	0	0.158056	-0.00376223	-0.00314775	0.0242665		0		0.241519	0.683087		0.492737	0.249067		0.0335794	0.00058492		0.213405	0.707884
J3KN66|J3KN66_HUMAN Torsin-1A-interacting protein 1 OS=Homo sapiens OX=9606 GN=TOR1AIP1 PE=1 SV=1	J3KN66	TOR1AIP1		0	-0.165143	-0.0233239	-0.0871764	0.154226	0	0	0	0	0	0	-0.102461	-0.0478406	-0.158168	0.0107299	0	0	0	0	0		0		-0.0669008	0.683087		-0.0177911	0.069797		-0.0613361	0.00058492		0.0412391	0.173466
[truncated: 1,787 more rows]
