# Supplementary material for: Identification of a Resistance Exercise-Specific Signaling Pathway that Drives Skeletal Muscle Growth
Source: Research Square preprint supplement (doi:10.21203/rs.3.rs-4997138/v1), 2024-11-12
Supplement: Supplementary file 2 [file 65f1786b5658179989f38d88.xlsx]

## Sheet: Supplementary Table 1
Characteristics of the subjects for the phosphorproteomics study
		Age	Height	Mass	BMI	Body fat	Lean mass	Lean mass	VO2 peak	Peak Work	Leg Press 1RM	Leg Ext. 1 RM	Exercise Order
SubjectI ID	Sex	(years)	(cm)	(kg)	(kg/m2)	(%)	(kg)	(%)	mL/kg/min	(Watts)	(lbs)	(lbs)
A	M	21	177	79.3	25.312	21.4	59.9	75.5	46.5	308	320	165	RE followed by END
B	M	21	181	92.8	28.3264	22.9	68.8	74.1	44.6	385	400	215	RE followed by END
C	M	22	182	93.3	28.1669	21.3	70.3	75.3	46.6	338	540	185	END followed by RE
D	M	21	178	72.1	22.756	21.7	54	74.9	51.5	349	310	125	END followed by RE
Average		21.25	179.5	84.375	26.1403	21.825	63.25	74.95	47.3	345	392.5	172.5
STD		0.5	2.38048	10.4414	2.64737	0.736546	7.68744	0.619139	2.94732	31.8015	106.262	37.7492
SEM		0.25	1.19024	5.22069	1.32369	0.368273	3.84372	0.30957	1.47366	15.9007	53.1311	18.8746
