# Supplementary material for: Identification of a Resistance Exercise-Specific Signaling Pathway that Drives Skeletal Muscle Growth
Source: Research Square preprint supplement (doi:10.21203/rs.3.rs-4997138/v1), 2024-11-12
Supplement: Supplementary file 3 [file 6cf696bf781829cb7fa318b7.xlsx]

## Sheet: Inferred Kinase Activity
mS - mean log2(fold change) vs. pre-exercise of all the kinase's substrates		0 hr END						0 hr RE						3 hr END						3 hr RE
m - total # of substrates		0hr END Kinase	mS	m	z.score	FDR		0hr RE Kinase	mS	m	z.score	FDR		3hr END Kinase	mS	m	z.score	FDR		3hr RE Kinase	mS	m	z.score	FDR
z.score - normalized score for each kinase		MAPK3	0.0206606	600	4.26711	0.00021422		MAPK3	0.114491	600	2.2868	0.0644562		MAPK3	-0.0944143	600	-1.20855	0.369774		MAPK3	0.136324	600	5.91631	1.95906e-07
FDR - P-value adjusted for multiple hypothesis testing using the Benjamini & Hochberg method		MAPK1	0.0380011	319	3.80133	0.00114177		MAPK1	0.126934	319	2.20805	0.0736733		MAPK1	-0.098608	319	-1.08435	0.40374		MAPK1	0.145243	319	4.7088	7.67264e-05
		CDC42BPB	-0.418618	10	-2.54365	0.0435143		CDC42BPB	-0.243975	10	-2.46246	0.0497592		CDC42BPB	-0.635683	10	-4.79796	6.35823e-05		CDC42BPB	-0.512088	10	-4.31958	0.000372054
		CDC42BPA	-0.317452	14	-2.16645	0.0973771		CDC42BPA	-0.190077	14	-2.42302	0.0523337		CDC42BPA	-0.475931	14	-4.05597	0.0014853		CDC42BPA	-0.413089	14	-4.19268	0.000546758
		MAPKAPK5	0.0943493	15	1.31046	0.284031		MAPKAPK5	0.408158	15	3.12849	0.0130681		MAPKAPK5	-0.184757	15	-1.13999	0.386448		MAPKAPK5	0.456647	15	4.01108	0.000899052
		MAPK12	0.140368	27	2.29085	0.0769018		MAPK12	0.14823	27	0.911586	0.380178		MAPK12	-0.0286824	27	0.669911	0.436124		MAPK12	0.318167	27	3.59754	0.00424755
		MAPKAPK3	0.138342	11	1.44725	0.266537		MAPKAPK3	0.567212	11	3.9624	0.00098108		MAPKAPK3	-0.351881	11	-2.47945	0.130489		MAPKAPK3	0.464832	11	3.50219	0.00549134
		DMPK	0.153359	28	2.48603	0.0495875		DMPK	0.290923	28	2.76519	0.028208		DMPK	-0.135753	28	-0.854304	0.425086		DMPK	0.303574	28	3.47212	0.00558613
		MAPKAPK2	0.33842	13	3.18037	0.0079562		MAPKAPK2	0.531254	13	3.99219	0.000973815		MAPKAPK2	0.0153946	13	0.895836	0.421206		MAPKAPK2	0.409432	13	3.31208	0.00918333
		MAPK10	0.0709266	16	1.14473	0.322865		MAPK10	0.140918	16	0.630594	0.429089		MAPK10	-0.0938881	16	-0.191648	0.488124		MAPK10	0.317043	16	2.75824	0.0461039
		SRC	0.758108	6	4.45075	0.000113143		SRC	0.626209	6	3.27799	0.00957025		SRC	0.215091	6	1.93518	0.242432		SRC	0.486115	6	2.71578	0.0491768
		AURKB	-0.166409	48	-1.6803	0.20148		AURKB	-0.000455366	48	-1.29057	0.284346		AURKB	-0.185973	48	-2.06215	0.194337		AURKB	-0.115475	48	-2.65152	0.0560919
		MAPK8	0.0551326	56	1.87829	0.159569		MAPK8	0.126134	56	0.910591	0.380178		MAPK8	-0.132988	56	-1.15206	0.386448		MAPK8	0.177578	56	2.5728	0.0666921
		CDK2	-0.0189713	118	0.933293	0.38284		CDK2	0.0802219	118	0.108516	0.487138		CDK2	-0.100819	118	-0.724639	0.436124		CDK2	0.127777	118	2.39354	0.0945568
		PAK2	-0.139772	53	-1.33364	0.283474		PAK2	0.0274255	53	-0.862331	0.398553		PAK2	-0.218151	53	-2.80219	0.0603999		PAK2	-0.0905596	53	-2.33651	0.105286
		MAP2K1	0.1328	64	3.39212	0.00443467		MAP2K1	0.173497	64	1.89523	0.136945		MAP2K1	-0.0239263	64	1.13458	0.386448		MAP2K1	0.148149	64	2.16678	0.149999
		GSK3A	-0.0646979	111	-0.168026	0.495655		GSK3A	0.005763	111	-1.80317	0.155047		GSK3A	-0.0603746	111	0.45278	0.461067		GSK3A	0.118978	111	2.09164	0.160743
		CDK5	-0.0736248	78	-0.316483	0.487763		CDK5	0.0398762	78	-0.778616	0.405535		CDK5	-0.145547	78	-1.66045	0.317507		CDK5	0.132872	78	2.05757	0.168432
		GSK3B	-0.0530399	123	0.111151	0.495655		GSK3B	-0.0214137	123	-2.63138	0.0348994		GSK3B	-0.0268619	123	1.4846	0.341257		GSK3B	0.112265	123	2.01722	0.177644
		PRKACA	-0.177298	102	-2.69442	0.0322723		PRKACA	0.0561258	102	-0.491137	0.454742		PRKACA	-0.15889	102	-2.26427	0.147544		PRKACA	-0.0369142	102	-1.8982	0.211225
		MAPK9	0.129681	20	1.86519	0.160792		MAPK9	0.170938	20	1.03162	0.368821		MAPK9	-0.214627	20	-1.67862	0.316966		MAPK9	0.209029	20	1.88625	0.211225
		MAPK14	0.0280844	27	0.991125	0.375228		MAPK14	0.137189	27	0.772024	0.405984		MAPK14	-0.120491	27	-0.623844	0.436124		MAPK14	0.184355	27	1.87377	0.211225
		MARK3	-0.0302821	19	0.264671	0.495655		MARK3	0.114719	19	0.409348	0.456134		MARK3	-0.197663	19	-1.43559	0.346173		MARK3	0.208958	19	1.83772	0.212606
		RPS6KA3	0.0962739	44	2.27287	0.0783165		RPS6KA3	0.139752	44	1.02689	0.368821		RPS6KA3	-0.0895754	44	-0.240228	0.488124		RPS6KA3	0.150915	44	1.84209	0.212606
		PAK1	0.0715767	133	3.31711	0.0051541		PAK1	0.166435	133	2.53398	0.0447347		PAK1	-0.0360597	133	1.2561	0.362664		PAK1	0.101279	133	1.7835	0.233317
		PDK1	0.0157164	66	1.32576	0.283474		PDK1	0.0537688	66	-0.441655	0.454742		PDK1	-0.0125382	66	1.40308	0.360576		PDK1	0.125816	66	1.75057	0.244164
		PDK2	0.230417	16	2.56591	0.0422265		PDK2	0.0953262	16	0.186938	0.477638		PDK2	0.0401895	16	1.26281	0.362664		PDK2	0.202428	16	1.62165	0.277345
		AKT1	0.0400181	145	2.61696	0.0377044		AKT1	0.0975509	145	0.627927	0.429089		AKT1	-0.0312664	145	1.46807	0.345063		AKT1	0.0925084	145	1.60041	0.283292
		IKBKB	-0.0158216	66	0.754993	0.425239		IKBKB	0.0748047	66	-0.0259071	0.493815		IKBKB	-0.102365	66	-0.575999	0.440206		IKBKB	0.116439	66	1.56172	0.299663
		MAP2K2	0.332285	25	4.34203	0.000167992		MAP2K2	0.316689	25	2.92626	0.0204123		MAP2K2	0.0499071	25	1.71029	0.306856		MAP2K2	0.159133	25	1.49039	0.309093
		PRKCE	-0.0618576	65	-0.0775669	0.495655		PRKCE	0.00432966	65	-1.40796	0.266731		PRKCE	-0.133392	65	-1.25002	0.362664		PRKCE	-0.0356267	65	-1.48957	0.309093
		CDK6	-0.178848	10	-0.854572	0.396117		CDK6	0.0011928	10	-0.576381	0.441728		CDK6	-0.204839	10	-1.10303	0.396972		CDK6	-0.153997	10	-1.51225	0.309093
		CDK4	-0.140936	19	-0.80981	0.407769		CDK4	0.115193	19	0.414385	0.456134		CDK4	-0.154182	19	-0.921591	0.421206		CDK4	0.176276	19	1.48455	0.309093
		CHUK	-0.0215898	59	0.615132	0.432957		CHUK	0.0715366	59	-0.0855627	0.487138		CHUK	-0.132139	59	-1.16483	0.386448		CHUK	0.113258	59	1.41601	0.344055
		MARK1	0.00859768	23	0.706578	0.425758		MARK1	0.0398905	23	-0.422638	0.454742		MARK1	-0.21	23	-1.73995	0.306856		MARK1	0.154945	23	1.37974	0.350038
		MAP2K4	0.000312724	44	0.854863	0.396117		MAP2K4	0.290618	44	3.46141	0.00639444		MAP2K4	-0.236857	44	-2.8897	0.0509856		MAP2K4	0.12152	44	1.3587	0.351436
		PKD1	-0.0160967	26	0.470743	0.462812		PKD1	0.156187	26	0.993251	0.370388		PKD1	-0.165646	26	-1.2366	0.362664		PKD1	0.146555	26	1.3609	0.351436
		ABL1	0.594282	6	3.5568	0.00262779		ABL1	0.587885	6	3.04962	0.0160392		ABL1	0.0770194	6	1.01797	0.421206		ABL1	0.258774	6	1.33522	0.354666
		CAMK2A	-0.0439606	393	0.599643	0.434384		CAMK2A	0.0928848	393	0.808735	0.399015		CAMK2A	-0.0883969	393	-0.65459	0.436124		CAMK2A	0.0116174	393	-1.34078	0.354666
		AKT3	0.0388717	26	1.09513	0.342543		AKT3	0.203324	26	1.57797	0.206577		AKT3	0.0399925	26	1.60706	0.317507		AKT3	0.136703	26	1.23637	0.385346
		ARAF	-0.0240179	33	0.428971	0.474848		ARAF	0.0849344	33	0.123243	0.487138		ARAF	-0.0480901	33	0.438261	0.461067		ARAF	0.124291	33	1.21612	0.391893
		MAP2K7	0.0792336	18	1.29268	0.284617		MAP2K7	0.303234	18	2.34414	0.0583501		MAP2K7	-0.186436	18	-1.26812	0.362664		MAP2K7	0.150559	18	1.17446	0.402607
		PRKAA2	-0.012957	70	0.830925	0.399305		PRKAA2	0.0414365	70	-0.705849	0.422845		PRKAA2	-0.0127649	70	1.43983	0.346173		PRKAA2	0.0938373	70	1.13954	0.420594
		INSR	1.18566	5	6.1927	1.75945e-08		INSR	1.01642	5	5.11505	9.33144e-06		INSR	0.303947	5	2.3054	0.147544		INSR	0.236128	5	1.09335	0.442284
		DAPK3	0.978973	6	5.65594	3.07401e-07		DAPK3	0.620568	6	3.24438	0.0100052		DAPK3	0.291741	6	2.44436	0.132831		DAPK3	0.213275	6	1.05893	0.447616
		CAMK2D	-0.153752	37	-1.30374	0.284031		CAMK2D	0.0289667	37	-0.697698	0.422845		CAMK2D	-0.19704	37	-1.99306	0.220173		CAMK2D	-0.0255413	37	-0.971752	0.459978
		PRKG1	0.00716568	54	1.05922	0.357461		PRKG1	0.171734	54	1.70937	0.173862		PRKG1	-0.127751	54	-1.02693	0.421206		PRKG1	0.0889237	54	0.911355	0.479395
		RPS6KB2	-0.162328	16	-0.933751	0.38284		RPS6KB2	0.186656	16	1.07567	0.357181		RPS6KB2	-0.224514	16	-1.60867	0.317507		RPS6KB2	-0.0503761	16	-0.885296	0.481115
		AURKA	-0.114273	37	-0.768774	0.42081		AURKA	-0.0225391	37	-1.45987	0.25257		AURKA	-0.13061	37	-0.897209	0.421206		AURKA	0.0976547	37	0.886047	0.481115
		MARK4	-0.115308	28	-0.68097	0.425758		MARK4	-0.00434835	28	-1.0358	0.368821		MARK4	-0.303381	28	-3.25984	0.0265308		MARK4	-0.00584	28	-0.586895	0.487423
		GRK6	0.299798	5	1.77999	0.182331		GRK6	0.596598	5	2.8313	0.0250758		GRK6	0.297631	5	2.2671	0.147544		GRK6	0.153226	5	0.633777	0.487423
		CSNK1D	-0.143647	62	-1.51041	0.251319		CSNK1D	0.005326	62	-1.356	0.28156		CSNK1D	-0.159502	62	-1.77839	0.304725		CSNK1D	0.0549187	62	0.312729	0.487423
		PRKCA	-0.0413908	140	0.425636	0.474848		PRKCA	0.0596087	140	-0.475142	0.454742		PRKCA	-0.0210792	140	1.76943	0.304725		PRKCA	0.0574588	140	0.544444	0.487423
		MAP2K3	0.180546	25	2.6519	0.035277		MAP2K3	0.355229	25	3.39505	0.00742298		MAP2K3	-0.19183	25	-1.56764	0.317668		MAP2K3	0.0978975	25	0.731335	0.487423
		AKT2	0.0301581	48	1.35351	0.283474		AKT2	0.0704717	48	-0.0951239	0.487138		AKT2	-0.00231038	48	1.38872	0.362664		AKT2	0.0782712	48	0.676268	0.487423
		GRK5	0.0725908	11	0.961452	0.377132		GRK5	0.0676151	11	-0.0685862	0.487183		GRK5	0.0648949	11	1.26929	0.362664		GRK5	0.0695623	11	0.252131	0.487423
		PRKD1	-0.110505	10	-0.373127	0.479417		PRKD1	0.207451	10	1.01037	0.368821		PRKD1	-0.22575	10	-1.28236	0.362664		PRKD1	0.102032	10	0.49495	0.487423
		EIF2AK2	-0.0375761	30	0.243576	0.495655		EIF2AK2	0.0967957	30	0.275556	0.477331		EIF2AK2	-0.165268	30	-1.32271	0.362664		EIF2AK2	-0.0104427	30	-0.669993	0.487423
		ADRBK1	0.0938264	78	2.97803	0.0143847		ADRBK1	0.198848	78	2.63695	0.0348994		ADRBK1	-0.03725	78	0.933423	0.421206		ADRBK1	0.0690444	78	0.660053	0.487423
		ATM	0.097087	17	1.42024	0.272191		ATM	0.0123111	17	-0.639987	0.429089		ATM	0.00506562	17	0.908932	0.421206		ATM	-0.000324801	17	-0.40093	0.487423
		CSNK1A1	-0.126549	65	-1.23943	0.294334		CSNK1A1	0.0334346	65	-0.837117	0.399015		CSNK1A1	-0.119494	65	-0.946148	0.421206		CSNK1A1	0.051237	65	0.246617	0.487423
		CDK7	-0.106515	31	-0.607464	0.434105		CDK7	0.0749973	31	-0.0151471	0.495523		CDK7	-0.145652	31	-1.04837	0.421206		CDK7	0.0727853	31	0.467751	0.487423
		CAMK1	-0.00873392	19	0.473909	0.462812		CAMK1	0.0430012	19	-0.351147	0.46221		CAMK1	-0.15453	19	-0.925704	0.421206		CAMK1	0.012374	19	-0.286631	0.487423
		PRKDC	-0.0585207	27	-0.0113664	0.497556		PRKDC	0.0401568	27	-0.454551	0.454742		PRKDC	-0.149428	27	-1.03161	0.421206		PRKDC	0.0533324	27	0.185939	0.487423
		CSNK1G2	-0.380483	5	-1.60867	0.224823		CSNK1G2	-0.317225	5	-2.13968	0.0837665		CSNK1G2	-0.21804	5	-0.860013	0.425086		CSNK1G2	-0.0617356	5	-0.557867	0.487423
		SGK3	-0.32399	5	-1.32727	0.283474		SGK3	0.00986768	5	-0.360373	0.46221		SGK3	-0.218119	5	-0.860489	0.425086		SGK3	0.17859	5	0.774383	0.487423
		BRAF	0.300111	5	1.78155	0.182331		BRAF	0.313187	5	1.28961	0.284346		BRAF	0.0618065	5	0.837024	0.431594		BRAF	0.143758	5	0.581294	0.487423
		RPS6KA2	0.0333104	75	1.7527	0.189576		RPS6KA2	0.138762	75	1.31984	0.284346		RPS6KA2	-0.0449502	75	0.734448	0.436124		RPS6KA2	0.0297054	75	-0.197373	0.487423
		TGFBR2	0.15681	13	1.72166	0.195281		TGFBR2	0.199876	13	1.08555	0.357181		TGFBR2	-0.00798474	13	0.66723	0.436124		TGFBR2	0.0805958	13	0.372719	0.487423
		PLK1	-0.109347	53	-0.840212	0.399305		PLK1	0.0303425	53	-0.810669	0.399015		PLK1	-0.111409	53	-0.694723	0.436124		PLK1	-0.00759756	53	-0.839178	0.487423
		PRKCH	-0.0287994	28	0.338776	0.487763		PRKCH	0.0419355	28	-0.439994	0.454742		PRKCH	-0.019083	28	0.819961	0.436124		PRKCH	0.0631045	28	0.317545	0.487423
		CSNK2A2	-0.0750099	39	-0.243057	0.495655		CSNK2A2	0.0243934	39	-0.785787	0.40478		CSNK2A2	-0.0322739	39	0.744307	0.436124		CSNK2A2	0.0572092	39	0.283492	0.487423
		PRKCD	-0.060579	65	-0.0546031	0.495655		PRKCD	0.0345306	65	-0.815621	0.399015		PRKCD	-0.106006	65	-0.651225	0.436124		PRKCD	0.0334578	65	-0.108744	0.487423
		RPS6KB1	-0.0643181	39	-0.0943127	0.495655		RPS6KB1	0.119792	39	0.663549	0.424863		RPS6KB1	-0.0408885	39	0.598407	0.438183		RPS6KB1	0.0098024	39	-0.45047	0.487423
		ERBB2	0.22604	9	1.89518	0.157937		ERBB2	0.285762	9	1.53005	0.223801		ERBB2	-0.00757937	9	0.558467	0.441601		ERBB2	0.102623	9	0.473949	0.487423
		ICK	0.209199	6	1.45551	0.266428		ICK	0.0323426	6	-0.260841	0.477331		ICK	-0.0123954	6	0.423994	0.461067		ICK	-0.0368873	6	-0.460218	0.487423
		NEK1	-0.0384744	23	0.203677	0.495655		NEK1	0.0801874	23	0.0475066	0.493496		NEK1	-0.0414909	23	0.451711	0.461067		NEK1	0.0294076	23	-0.112841	0.487423
		ROCK1	0.0272665	79	1.67916	0.20148		ROCK1	0.18448	79	2.34312	0.0583501		ROCK1	-0.0913432	79	-0.364505	0.466935		ROCK1	0.0592748	79	0.448997	0.487423
		PRKACB	-0.000860766	30	0.691561	0.425758		PRKACB	0.0929014	30	0.223666	0.477638		PRKACB	-0.0525717	30	0.351294	0.466935		PRKACB	0.0296015	30	-0.12624	0.487423
		ATR	-0.056653	5	0.00441254	0.49824		ATR	-0.0372997	5	-0.616953	0.429537		ATR	-0.135818	5	-0.361405	0.466935		ATR	-0.10907	5	-0.820266	0.487423
		RPS6KA1	0.139848	14	1.64527	0.212317		RPS6KA1	0.268484	14	1.75103	0.167606		RPS6KA1	-0.104072	14	-0.282607	0.484397		RPS6KA1	0.109243	14	0.65252	0.487423
		CAMK2G	-0.023842	14	0.280871	0.49297		CAMK2G	0.0670004	14	-0.0829705	0.487138		CAMK2G	-0.0473282	14	0.293188	0.484397		CAMK2G	0.0260883	14	-0.118828	0.487423
		EGFR	0.517026	7	3.38644	0.00443467		EGFR	0.496897	7	2.70833	0.0309507		EGFR	-0.0569786	7	0.138071	0.488124		EGFR	-0.0767929	7	-0.758841	0.487423
		ROCK2	0.101787	46	2.40724	0.059774		ROCK2	0.126907	46	0.838046	0.399015		ROCK2	-0.0700127	46	0.114199	0.488124		ROCK2	0.0630877	46	0.406727	0.487423
		PRKAA1	0.0628878	34	1.56429	0.233537		PRKAA1	0.102708	34	0.377215	0.46221		PRKAA1	-0.062858	34	0.211321	0.488124		PRKAA1	0.0622175	34	0.337096	0.487423
		CSNK1E	-0.200484	20	-1.42409	0.272191		CSNK1E	-0.144141	20	-2.39629	0.0547467		CSNK1E	-0.0593628	20	0.204466	0.488124		CSNK1E	0.109382	20	0.781456	0.487423
		RAF1	-0.00108813	98	1.24491	0.294334		RAF1	0.146787	98	1.70197	0.173862		RAF1	-0.0802101	98	-0.107087	0.488124		RAF1	0.0497489	98	0.266297	0.487423
		BCKDK	0.0998731	6	0.858951	0.396117		BCKDK	-0.116349	6	-1.14689	0.336178		BCKDK	-0.112965	6	-0.244084	0.488124		BCKDK	0.157163	6	0.718175	0.487423
		MTOR	-0.0964804	20	-0.387958	0.478705		MTOR	-0.13118	20	-2.25528	0.0683272		MTOR	-0.0593798	20	0.20426	0.488124		MTOR	0.0187286	20	-0.223624	0.487423
		CSNK2A1	-0.061461	119	-0.0953144	0.495655		CSNK2A1	0.012055	119	-1.70004	0.173862		CSNK2A1	-0.0788615	119	-0.0781049	0.490486		CSNK2A1	0.0150668	119	-0.644505	0.487423
		MET	0.213876	7	1.5997	0.225005		MET	0.284528	7	1.34143	0.28156		MET	-0.0707563	7	0.0392131	0.491826		MET	-0.00209133	7	-0.268859	0.487423
		PDPK1	0.0439891	8	0.639714	0.425758		PDPK1	-0.0614688	8	-0.946694	0.375335		PDPK1	-0.0707471	8	0.0419911	0.491826		PDPK1	0.145027	8	0.744179	0.487423
		PAK4	-0.0251275	31	0.402005	0.478705		PAK4	-0.0436835	31	-1.62267	0.191609		PAK4	-0.0728009	31	0.0516472	0.491826		PAK4	0.0285123	31	-0.143362	0.487423
		MAP2K5	-0.113934	6	-0.307731	0.487763		MAP2K5	-0.0584908	6	-0.802116	0.399015		MAP2K5	-0.0715769	6	0.030853	0.491826		MAP2K5	-0.0499614	6	-0.539612	0.487423
		CAMK2B	-0.0809436	32	-0.294941	0.488752		CAMK2B	0.0527181	32	-0.321988	0.473127		CAMK2B	-0.150859	32	-1.14503	0.386448		CAMK2B	0.0333956	32	-0.077172	0.489023
		MAP2K6	0.0296099	36	1.16484	0.315715		MAP2K6	0.282224	36	3.00844	0.0173602		MAP2K6	-0.219137	36	-2.32551	0.147544		MAP2K6	0.0431203	36	0.0628007	0.489276
		STK11	0.104362	15	1.39685	0.276177		STK11	0.261634	15	1.74795	0.167606		STK11	-0.118399	15	-0.443013	0.461067		STK11	0.0449214	15	0.0578313	0.489276
		CSNK1G1	-0.184093	8	-0.797401	0.41139		CSNK1G1	-0.164572	8	-1.65613	0.182089		CSNK1G1	-0.176512	8	-0.769293	0.436124		CSNK1G1	0.0444217	8	0.0387299	0.489741
		DYRK2	-0.0630098	5	-0.0272528	0.495655		DYRK2	-0.0721126	5	-0.806327	0.399015		DYRK2	0.0705314	5	0.889933	0.421206		DYRK2	0.0397089	5	0.00449324	0.498207

## Sheet: Kinase Substrate Links
Kinase - Gene name for each kinase		0 hr END						0 hr RE						3 hr END						3 hr RE
Substrate - Gene name for each substrate linked to that kinase		Kinase	Substrate	Site	Source	log2(fold change)		Kinase	Substrate	Site	Source	log2(fold change)		Kinase	Substrate	Site	Source	log2(fold change)		Kinase	Substrate	Site	Source	log2(fold change)
Site - Substrate's specific amino acid residue		ABL1	MAPK14	Y182	NetworKIN	0.204864		ABL1	MAPK14	Y182	NetworKIN	-0.00322789		ABL1	MAPK14	Y182	NetworKIN	-0.768601		ABL1	MAPK14	Y182	NetworKIN	-0.71028
Source - Source database (i.e., NetworKIN or PhosphoSitePlus)		ABL1	MAPK12	Y185	NetworKIN	0.368774		ABL1	MAPK12	Y185	NetworKIN	0.60074		ABL1	MAPK12	Y185	NetworKIN	0.193471		ABL1	MAPK12	Y185	NetworKIN	0.250569
log2(fold change) vs. pre-exercise		ABL1	ABL2	Y310	NetworKIN	0.147862		ABL1	ABL2	Y310	NetworKIN	0.102967		ABL1	ABL2	Y310	NetworKIN	1.02735		ABL1	ABL2	Y310	NetworKIN	0.592422
		ABL1	STAT5B	Y699	NetworKIN	3.09371		ABL1	STAT5B	Y699	NetworKIN	2.77338		ABL1	STAT5B	Y699	NetworKIN	0.404187		ABL1	STAT5B	Y699	NetworKIN	1.02216
		ABL1	PXN	Y88	NetworKIN	-0.13133		ABL1	PXN	Y88	NetworKIN	-0.0714683		ABL1	PXN	Y88	NetworKIN	-0.108439		ABL1	PXN	Y88	NetworKIN	0.197437
		ABL2	CRKL	Y207	NetworKIN	-0.118188		ABL2	CRKL	Y207	NetworKIN	0.124918		ABL2	CRKL	Y207	NetworKIN	-0.285857		ABL2	CRKL	Y207	NetworKIN	0.200331
		ABL2	ABL2	Y310	NetworKIN	0.147862		ABL2	ABL2	Y310	NetworKIN	0.102967		ABL2	ABL2	Y310	NetworKIN	1.02735		ABL2	ABL2	Y310	NetworKIN	0.592422
		ACTR2	RALBP1	S29	NetworKIN	-0.188045		ACTR2	RALBP1	S29	NetworKIN	0.0186289		ACTR2	RALBP1	S29	NetworKIN	-0.242785		ACTR2	RALBP1	S29	NetworKIN	-0.109331
		ACTR2	BMPR2	S586	NetworKIN	0.191179		ACTR2	BMPR2	S586	NetworKIN	0.101241		ACTR2	BMPR2	S586	NetworKIN	0.115863		ACTR2	BMPR2	S586	NetworKIN	0.219336
		ACTR2	RALBP1	T36	NetworKIN	-0.375822		ACTR2	RALBP1	T36	NetworKIN	-0.14465		ACTR2	RALBP1	T36	NetworKIN	-0.0143239		ACTR2	RALBP1	T36	NetworKIN	-0.324854
		ACVR2B	SNX2	S185	NetworKIN	0.183384		ACVR2B	SNX2	S185	NetworKIN	0.628599		ACVR2B	SNX2	S185	NetworKIN	0.271053		ACVR2B	SNX2	S185	NetworKIN	0.260615
		ACVR2B	SNX1	S188	NetworKIN	0.197809		ACVR2B	SNX1	S188	NetworKIN	1.25947		ACVR2B	SNX1	S188	NetworKIN	0.112086		ACVR2B	SNX1	S188	NetworKIN	0.370078
		ACVR2B	BMPR2	S586	NetworKIN	0.191179		ACVR2B	BMPR2	S586	NetworKIN	0.101241		ACVR2B	BMPR2	S586	NetworKIN	0.115863		ACVR2B	BMPR2	S586	NetworKIN	0.219336
		ADRBK1	PLEK	S117	NetworKIN	1.0642		ADRBK1	PLEK	S117	NetworKIN	2.63249		ADRBK1	PLEK	S117	NetworKIN	0.623806		ADRBK1	PLEK	S117	NetworKIN	1.11687
		ADRBK1	MEF2D	S121	NetworKIN	-0.164451		ADRBK1	MEF2D	S121	NetworKIN	0.0441518		ADRBK1	MEF2D	S121	NetworKIN	-0.345709		ADRBK1	MEF2D	S121	NetworKIN	-0.240924
		ADRBK1	MTOR	S1261	NetworKIN	1.57622		ADRBK1	MTOR	S1261	NetworKIN	0.481325		ADRBK1	MTOR	S1261	NetworKIN	0.0617946		ADRBK1	MTOR	S1261	NetworKIN	0.356927
		ADRBK1	RICTOR	S1388	NetworKIN	-0.560385		ADRBK1	RICTOR	S1388	NetworKIN	-0.44088		ADRBK1	RICTOR	S1388	NetworKIN	-0.319554		ADRBK1	RICTOR	S1388	NetworKIN	-0.249398
		ADRBK1	PRKACA	S140	NetworKIN	-0.120014		ADRBK1	PRKACA	S140	NetworKIN	-0.151208		ADRBK1	PRKACA	S140	NetworKIN	0.0260225		ADRBK1	PRKACA	S140	NetworKIN	-0.0919312
		ADRBK1	MYLPF	S15	NetworKIN	-0.691405		ADRBK1	MYLPF	S15	NetworKIN	0.0914837		ADRBK1	MYLPF	S15	NetworKIN	-0.43551		ADRBK1	MYLPF	S15	NetworKIN	-0.379757
		ADRBK1	PEBP1	S153	NetworKIN	-0.168334		ADRBK1	PEBP1	S153	NetworKIN	0.622635		ADRBK1	PEBP1	S153	NetworKIN	0.163425		ADRBK1	PEBP1	S153	NetworKIN	0.0199989
		ADRBK1	AKAP12	S219	NetworKIN	1.4521		ADRBK1	AKAP12	S219	NetworKIN	0.661942		ADRBK1	AKAP12	S219	NetworKIN	0.291122		ADRBK1	AKAP12	S219	NetworKIN	0.733446
		ADRBK1	PRKCA	S226	NetworKIN	0.18256		ADRBK1	PRKCA	S226	NetworKIN	0.0907752		ADRBK1	PRKCA	S226	NetworKIN	0.0478914		ADRBK1	PRKCA	S226	NetworKIN	0.218535
		ADRBK1	ADRB2	S246	NetworKIN	-0.166579		ADRBK1	ADRB2	S246	NetworKIN	0.0461301		ADRBK1	ADRB2	S246	NetworKIN	-0.0882885		ADRBK1	ADRB2	S246	NetworKIN	-0.451089
		ADRBK1	PXN	S250	NetworKIN	1.54851		ADRBK1	PXN	S250	NetworKIN	1.10272		ADRBK1	PXN	S250	NetworKIN	1.45694		ADRBK1	PXN	S250	NetworKIN	1.87652
		ADRBK1	PXN	S258	NetworKIN	0.672052		ADRBK1	PXN	S258	NetworKIN	0.417286		ADRBK1	PXN	S258	NetworKIN	0.0661558		ADRBK1	PXN	S258	NetworKIN	0.607062
		ADRBK1	RAF1	S259	NetworKIN	0.0704419		ADRBK1	RAF1	S259	NetworKIN	0.221194		ADRBK1	RAF1	S259	NetworKIN	-0.06939		ADRBK1	RAF1	S259	NetworKIN	0.139441
		ADRBK1	CAMK2B	S280	NetworKIN	0.0336311		ADRBK1	CAMK2B	S280	NetworKIN	0.631659		ADRBK1	CAMK2B	S280	NetworKIN	0.222402		ADRBK1	CAMK2B	S280	NetworKIN	0.390268
		ADRBK1	TPM2	S283	NetworKIN	0.395881		ADRBK1	TPM2	S283	NetworKIN	0.243894		ADRBK1	TPM2	S283	NetworKIN	0.087995		ADRBK1	TPM2	S283	NetworKIN	-0.0728965
		ADRBK1	MAPK1	S284	NetworKIN	0.18042		ADRBK1	MAPK1	S284	NetworKIN	0.0671496		ADRBK1	MAPK1	S284	NetworKIN	0.371742		ADRBK1	MAPK1	S284	NetworKIN	0.144199
		ADRBK1	TPM3	S284	NetworKIN	0.0219731		ADRBK1	TPM3	S284	NetworKIN	0.191737		ADRBK1	TPM3	S284	NetworKIN	-0.0700679		ADRBK1	TPM3	S284	NetworKIN	0.0078112
		ADRBK1	SLC9A3R1	S290	NetworKIN	-0.222462		ADRBK1	SLC9A3R1	S290	NetworKIN	0.152546		ADRBK1	SLC9A3R1	S290	NetworKIN	-0.26415		ADRBK1	SLC9A3R1	S290	NetworKIN	0.149848
		ADRBK1	PRKCA	S319	NetworKIN	0.395863		ADRBK1	PRKCA	S319	NetworKIN	0.51577		ADRBK1	PRKCA	S319	NetworKIN	0.236552		ADRBK1	PRKCA	S319	NetworKIN	0.426276
		ADRBK1	LTB4R	S320	NetworKIN	1.30756		ADRBK1	LTB4R	S320	NetworKIN	0.495965		ADRBK1	LTB4R	S320	NetworKIN	1.71336		ADRBK1	LTB4R	S320	NetworKIN	0.267466
		ADRBK1	PCYT1A	S322	NetworKIN	-0.360273		ADRBK1	PCYT1A	S322	NetworKIN	0.207981		ADRBK1	PCYT1A	S322	NetworKIN	0.0866993		ADRBK1	PCYT1A	S322	NetworKIN	-0.0681551
		ADRBK1	C5AR1	S327	NetworKIN	0.186201		ADRBK1	C5AR1	S327	NetworKIN	0.0382284		ADRBK1	C5AR1	S327	NetworKIN	0.481536		ADRBK1	C5AR1	S327	NetworKIN	-0.328648
		ADRBK1	CAMK2D	S330	NetworKIN	-0.179459		ADRBK1	CAMK2D	S330	NetworKIN	0.0844686		ADRBK1	CAMK2D	S330	NetworKIN	-0.318428		ADRBK1	CAMK2D	S330	NetworKIN	-0.0745757
		ADRBK1	CAMK2D	S333	NetworKIN	-0.137635		ADRBK1	CAMK2D	S333	NetworKIN	0.211022		ADRBK1	CAMK2D	S333	NetworKIN	-0.328143		ADRBK1	CAMK2D	S333	NetworKIN	0.0236544
		ADRBK1	PCYT1A	S339	NetworKIN	-0.066239		ADRBK1	PCYT1A	S339	NetworKIN	0.646991		ADRBK1	PCYT1A	S339	NetworKIN	-0.428959		ADRBK1	PCYT1A	S339	NetworKIN	-0.114409
		ADRBK1	PRKACA	S339	NetworKIN	-0.146119		ADRBK1	PRKACA	S339	NetworKIN	-0.0226544		ADRBK1	PRKACA	S339	NetworKIN	-0.185649		ADRBK1	PRKACA	S339	NetworKIN	-0.0496337
		ADRBK1	CAV1	S37	NetworKIN	0.0594972		ADRBK1	CAV1	S37	NetworKIN	-0.0155662		ADRBK1	CAV1	S37	NetworKIN	-0.0691817		ADRBK1	CAV1	S37	NetworKIN	0.138155
		ADRBK1	HDAC1	S393	NetworKIN	0.654851		ADRBK1	HDAC1	S393	NetworKIN	0.0987941		ADRBK1	HDAC1	S393	NetworKIN	-0.0572387		ADRBK1	HDAC1	S393	NetworKIN	0.450716
		ADRBK1	CAMK2B	S394	NetworKIN	-0.583267		ADRBK1	CAMK2B	S394	NetworKIN	-0.350537		ADRBK1	CAMK2B	S394	NetworKIN	-0.786503		ADRBK1	CAMK2B	S394	NetworKIN	-0.62616
		ADRBK1	CAMK2B	S397	NetworKIN	0.0458861		ADRBK1	CAMK2B	S397	NetworKIN	-0.0651567		ADRBK1	CAMK2B	S397	NetworKIN	-0.0535214		ADRBK1	CAMK2B	S397	NetworKIN	-0.414087
		ADRBK1	TGFB1I1	S403	NetworKIN	0.912858		ADRBK1	TGFB1I1	S403	NetworKIN	0.322808		ADRBK1	TGFB1I1	S403	NetworKIN	0.42274		ADRBK1	TGFB1I1	S403	NetworKIN	0.17356
		ADRBK1	ARRB1	S412	NetworKIN	-0.48373		ADRBK1	ARRB1	S412	NetworKIN	-0.344142		ADRBK1	ARRB1	S412	NetworKIN	-0.49657		ADRBK1	ARRB1	S412	NetworKIN	-0.316968
		ADRBK1	RAF1	S43	NetworKIN	0.116785		ADRBK1	RAF1	S43	NetworKIN	-0.0508473		ADRBK1	RAF1	S43	NetworKIN	0.0418492		ADRBK1	RAF1	S43	NetworKIN	0.137959
		ADRBK1	TPM1	S45	NetworKIN	0.0775337		ADRBK1	TPM1	S45	NetworKIN	0.162301		ADRBK1	TPM1	S45	NetworKIN	-0.0539074		ADRBK1	TPM1	S45	NetworKIN	0.216892
		ADRBK1	GRK5	S484	NetworKIN	-0.14382		ADRBK1	GRK5	S484	NetworKIN	0.155398		ADRBK1	GRK5	S484	NetworKIN	-0.235218		ADRBK1	GRK5	S484	NetworKIN	0.11381
		ADRBK1	ARHGEF6	S488	NetworKIN	-0.251012		ADRBK1	ARHGEF6	S488	NetworKIN	-0.26475		ADRBK1	ARHGEF6	S488	NetworKIN	-0.761579		ADRBK1	ARHGEF6	S488	NetworKIN	-0.295606
		ADRBK1	CAMK2D	S490	NetworKIN	-0.153031		ADRBK1	CAMK2D	S490	NetworKIN	0.169317		ADRBK1	CAMK2D	S490	NetworKIN	-0.399717		ADRBK1	CAMK2D	S490	NetworKIN	-0.00865398
		ADRBK1	PEBP1	S52	NetworKIN	-0.0794621		ADRBK1	PEBP1	S52	NetworKIN	-0.120339		ADRBK1	PEBP1	S52	NetworKIN	-0.199903		ADRBK1	PEBP1	S52	NetworKIN	-0.0981516
		ADRBK1	IRS1	S527	NetworKIN	0.0507815		ADRBK1	IRS1	S527	NetworKIN	0.159662		ADRBK1	IRS1	S527	NetworKIN	-0.348206		ADRBK1	IRS1	S527	NetworKIN	0.151421
		ADRBK1	EZR	S535	NetworKIN	0.40823		ADRBK1	EZR	S535	NetworKIN	0.127337		ADRBK1	EZR	S535	NetworKIN	0.377482		ADRBK1	EZR	S535	NetworKIN	0.132179
		ADRBK1	PRKAR2A	S58	NetworKIN	-0.0166637		ADRBK1	PRKAR2A	S58	NetworKIN	-0.0823947		ADRBK1	PRKAR2A	S58	NetworKIN	-0.231985		ADRBK1	PRKAR2A	S58	NetworKIN	-0.158718
		ADRBK1	AKAP12	S612	NetworKIN	-0.442376		ADRBK1	AKAP12	S612	NetworKIN	-0.327524		ADRBK1	AKAP12	S612	NetworKIN	-0.312116		ADRBK1	AKAP12	S612	NetworKIN	-0.102592
		ADRBK1	AKAP12	S627	NetworKIN	-0.586515		ADRBK1	AKAP12	S627	NetworKIN	-0.383762		ADRBK1	AKAP12	S627	NetworKIN	-0.591325		ADRBK1	AKAP12	S627	NetworKIN	-0.410645
		ADRBK1	AKAP12	S629	NetworKIN	0.153702		ADRBK1	AKAP12	S629	NetworKIN	-0.037479		ADRBK1	AKAP12	S629	NetworKIN	-0.0914417		ADRBK1	AKAP12	S629	NetworKIN	-0.0422448
		ADRBK1	IRS1	S629	NetworKIN	-0.287644		ADRBK1	IRS1	S629	NetworKIN	-0.148885		ADRBK1	IRS1	S629	NetworKIN	-0.21059		ADRBK1	IRS1	S629	NetworKIN	-0.399285
		ADRBK1	NOS3	S633	NetworKIN	0.545305		ADRBK1	NOS3	S633	NetworKIN	0.961529		ADRBK1	NOS3	S633	NetworKIN	0.0557009		ADRBK1	NOS3	S633	NetworKIN	0.360194
		ADRBK1	ARHGEF6	S640	NetworKIN	-0.183667		ADRBK1	ARHGEF6	S640	NetworKIN	-0.0784675		ADRBK1	ARHGEF6	S640	NetworKIN	-0.108226		ADRBK1	ARHGEF6	S640	NetworKIN	-0.191139
		ADRBK1	PRKCD	S645	NetworKIN	-0.172449		ADRBK1	PRKCD	S645	NetworKIN	0.567801		ADRBK1	PRKCD	S645	NetworKIN	-0.174828		ADRBK1	PRKCD	S645	NetworKIN	0.180935
		ADRBK1	ARHGEF6	S649	NetworKIN	-0.0288898		ADRBK1	ARHGEF6	S649	NetworKIN	0.0409055		ADRBK1	ARHGEF6	S649	NetworKIN	-0.245886		ADRBK1	ARHGEF6	S649	NetworKIN	-0.218009
		ADRBK1	PRKCQ	S695	NetworKIN	-0.047501		ADRBK1	PRKCQ	S695	NetworKIN	0.0532247		ADRBK1	PRKCQ	S695	NetworKIN	-0.214765		ADRBK1	PRKCQ	S695	NetworKIN	-0.0174269
		ADRBK1	AKAP12	S696	NetworKIN	-0.438935		ADRBK1	AKAP12	S696	NetworKIN	-0.450805		ADRBK1	AKAP12	S696	NetworKIN	-0.592846		ADRBK1	AKAP12	S696	NetworKIN	-0.38899
		ADRBK1	VCL	S721	NetworKIN	-0.205689		ADRBK1	VCL	S721	NetworKIN	0.102112		ADRBK1	VCL	S721	NetworKIN	-0.223486		ADRBK1	VCL	S721	NetworKIN	0.0325985
		ADRBK1	PRKAR2A	S78	NetworKIN	0.0231678		ADRBK1	PRKAR2A	S78	NetworKIN	0.0677798		ADRBK1	PRKAR2A	S78	NetworKIN	0.00315091		ADRBK1	PRKAR2A	S78	NetworKIN	0.181608
		ADRBK1	PRKAR2A	S80	NetworKIN	0.310193		ADRBK1	PRKAR2A	S80	NetworKIN	0.0535732		ADRBK1	PRKAR2A	S80	NetworKIN	0.33025		ADRBK1	PRKAR2A	S80	NetworKIN	0.503573
		ADRBK1	PXN	S83	NetworKIN	-0.148487		ADRBK1	PXN	S83	NetworKIN	-0.0648253		ADRBK1	PXN	S83	NetworKIN	-0.247021		ADRBK1	PXN	S83	NetworKIN	0.217149
		ADRBK1	PXN	S85	NetworKIN	-0.0335832		ADRBK1	PXN	S85	NetworKIN	-0.0489264		ADRBK1	PXN	S85	NetworKIN	-0.172548		ADRBK1	PXN	S85	NetworKIN	0.135288
		ADRBK1	PXN	S91	NetworKIN	-0.0278912		ADRBK1	PXN	S91	NetworKIN	-0.0394257		ADRBK1	PXN	S91	NetworKIN	0.373457		ADRBK1	PXN	S91	NetworKIN	0.290131
		ADRBK1	AR	S96	NetworKIN	-0.106137		ADRBK1	AR	S96	NetworKIN	0.440784		ADRBK1	AR	S96	NetworKIN	-0.529494		ADRBK1	AR	S96	NetworKIN	-0.505363
		ADRBK1	PRKAR2A	S99	NetworKIN	0.364506		ADRBK1	PRKAR2A	S99	NetworKIN	0.154254		ADRBK1	PRKAR2A	S99	NetworKIN	0.0751869		ADRBK1	PRKAR2A	S99	NetworKIN	0.236818
		ADRBK1	MAPK14	T180	NetworKIN	-0.406813		ADRBK1	MAPK14	T180	NetworKIN	0.90324		ADRBK1	MAPK14	T180	NetworKIN	-0.607261		ADRBK1	MAPK14	T180	NetworKIN	-0.165013
		ADRBK1	MAPK1	T181	NetworKIN	1.14009		ADRBK1	MAPK1	T181	NetworKIN	0.821711		ADRBK1	MAPK1	T181	NetworKIN	0.306912		ADRBK1	MAPK1	T181	NetworKIN	0.134891
		ADRBK1	MAPK1	T185	NetworKIN	0.843342		ADRBK1	MAPK1	T185	NetworKIN	0.433775		ADRBK1	MAPK1	T185	NetworKIN	0.120569		ADRBK1	MAPK1	T185	NetworKIN	0.0443969
		ADRBK1	MAPK3	T198	NetworKIN	1.25513		ADRBK1	MAPK3	T198	NetworKIN	0.41761		ADRBK1	MAPK3	T198	NetworKIN	0.393371		ADRBK1	MAPK3	T198	NetworKIN	0.14984
		ADRBK1	PRKACA	T198	NetworKIN	-0.302943		ADRBK1	PRKACA	T198	NetworKIN	-0.10909		ADRBK1	PRKACA	T198	NetworKIN	0.202844		ADRBK1	PRKACA	T198	NetworKIN	0.223321
		ADRBK1	MAPK3	T202	NetworKIN	1.21705		ADRBK1	MAPK3	T202	NetworKIN	0.983122		ADRBK1	MAPK3	T202	NetworKIN	0.414181		ADRBK1	MAPK3	T202	NetworKIN	0.12007
		ADRBK1	TPM2	T252	NetworKIN	-0.0356034		ADRBK1	TPM2	T252	NetworKIN	-0.11583		ADRBK1	TPM2	T252	NetworKIN	0.202657		ADRBK1	TPM2	T252	NetworKIN	0.129942
		ADRBK1	TPM2	T282	NetworKIN	0.0946881		ADRBK1	TPM2	T282	NetworKIN	-0.146853		ADRBK1	TPM2	T282	NetworKIN	-0.224037		ADRBK1	TPM2	T282	NetworKIN	0.152224
		ADRBK1	AKAP12	T285	NetworKIN	0.23112		ADRBK1	AKAP12	T285	NetworKIN	1.53341		ADRBK1	AKAP12	T285	NetworKIN	0.217601		ADRBK1	AKAP12	T285	NetworKIN	0.491338
		ADRBK1	CAMK2B	T400	NetworKIN	-0.371741		ADRBK1	CAMK2B	T400	NetworKIN	-0.098834		ADRBK1	CAMK2B	T400	NetworKIN	-0.41436		ADRBK1	CAMK2B	T400	NetworKIN	-0.532754
		ADRBK1	GRK5	T485	NetworKIN	-0.369719		ADRBK1	GRK5	T485	NetworKIN	0.245926		ADRBK1	GRK5	T485	NetworKIN	-0.175491		ADRBK1	GRK5	T485	NetworKIN	0.339156
		ADRBK1	PRKCA	T497	NetworKIN	0.0604465		ADRBK1	PRKCA	T497	NetworKIN	0.320043		ADRBK1	PRKCA	T497	NetworKIN	0.0135482		ADRBK1	PRKCA	T497	NetworKIN	0.0267949
		ADRBK1	PRKCD	T507	NetworKIN	0.191672		ADRBK1	PRKCD	T507	NetworKIN	0.938173		ADRBK1	PRKCD	T507	NetworKIN	0.260866		ADRBK1	PRKCD	T507	NetworKIN	0.574973
		ADRBK1	PEBP1	T51	NetworKIN	-0.0818552		ADRBK1	PEBP1	T51	NetworKIN	-0.0150484		ADRBK1	PEBP1	T51	NetworKIN	-0.0938991		ADRBK1	PEBP1	T51	NetworKIN	0.0971786
		ADRBK1	IRS1	T530	NetworKIN	-1.54654		ADRBK1	IRS1	T530	NetworKIN	-1.38042		ADRBK1	IRS1	T530	NetworKIN	-0.211666		ADRBK1	IRS1	T530	NetworKIN	-0.45964
		ADRBK1	PRKCQ	T536	NetworKIN	0.0412612		ADRBK1	PRKCQ	T536	NetworKIN	0.38229		ADRBK1	PRKCQ	T536	NetworKIN	-0.0325868		ADRBK1	PRKCQ	T536	NetworKIN	0.389292
		ADRBK1	PRKCQ	T538	NetworKIN	-0.202238		ADRBK1	PRKCQ	T538	NetworKIN	-0.0315419		ADRBK1	PRKCQ	T538	NetworKIN	-0.134877		ADRBK1	PRKCQ	T538	NetworKIN	-0.012507
		ADRBK1	PRKAR2A	T54	NetworKIN	-0.0859097		ADRBK1	PRKAR2A	T54	NetworKIN	-0.0331573		ADRBK1	PRKAR2A	T54	NetworKIN	-0.11137		ADRBK1	PRKAR2A	T54	NetworKIN	-0.0886254
		ADRBK1	EGFR	T693	NetworKIN	0.240213		ADRBK1	EGFR	T693	NetworKIN	0.41305		ADRBK1	EGFR	T693	NetworKIN	-0.387811		ADRBK1	EGFR	T693	NetworKIN	-0.0452674
		ADRBK2	PLEK	S117	NetworKIN	1.0642		ADRBK2	PLEK	S117	NetworKIN	2.63249		ADRBK2	PLEK	S117	NetworKIN	0.623806		ADRBK2	PLEK	S117	NetworKIN	1.11687
		ADRBK2	ADRB2	S246	NetworKIN	-0.166579		ADRBK2	ADRB2	S246	NetworKIN	0.0461301		ADRBK2	ADRB2	S246	NetworKIN	-0.0882885		ADRBK2	ADRB2	S246	NetworKIN	-0.451089
		ADRBK2	ARRB1	S412	NetworKIN	-0.48373		ADRBK2	ARRB1	S412	NetworKIN	-0.344142		ADRBK2	ARRB1	S412	NetworKIN	-0.49657		ADRBK2	ARRB1	S412	NetworKIN	-0.316968
		ADRBK2	PRKAR2A	S58	NetworKIN	-0.0166637		ADRBK2	PRKAR2A	S58	NetworKIN	-0.0823947		ADRBK2	PRKAR2A	S58	NetworKIN	-0.231985		ADRBK2	PRKAR2A	S58	NetworKIN	-0.158718
		ADRBK2	PRKAR2A	S78	NetworKIN	0.0231678		ADRBK2	PRKAR2A	S78	NetworKIN	0.0677798		ADRBK2	PRKAR2A	S78	NetworKIN	0.00315091		ADRBK2	PRKAR2A	S78	NetworKIN	0.181608
		ADRBK2	PRKAR2A	S80	NetworKIN	0.310193		ADRBK2	PRKAR2A	S80	NetworKIN	0.0535732		ADRBK2	PRKAR2A	S80	NetworKIN	0.33025		ADRBK2	PRKAR2A	S80	NetworKIN	0.503573
		ADRBK2	AR	S96	NetworKIN	-0.106137		ADRBK2	AR	S96	NetworKIN	0.440784		ADRBK2	AR	S96	NetworKIN	-0.529494		ADRBK2	AR	S96	NetworKIN	-0.505363
		ADRBK2	PRKAR2A	S99	NetworKIN	0.364506		ADRBK2	PRKAR2A	S99	NetworKIN	0.154254		ADRBK2	PRKAR2A	S99	NetworKIN	0.0751869		ADRBK2	PRKAR2A	S99	NetworKIN	0.236818
		ADRBK2	PRKAR2A	T54	NetworKIN	-0.0859097		ADRBK2	PRKAR2A	T54	NetworKIN	-0.0331573		ADRBK2	PRKAR2A	T54	NetworKIN	-0.11137		ADRBK2	PRKAR2A	T54	NetworKIN	-0.0886254
		AKT1	ARHGAP29	S1019	NetworKIN	0.00153823		AKT1	ARHGAP29	S1019	NetworKIN	0.0075035		AKT1	ARHGAP29	S1019	NetworKIN	-0.121195		AKT1	ARHGAP29	S1019	NetworKIN	-0.0290176
		AKT1	RTKN	S106	NetworKIN	0.0339245		AKT1	RTKN	S106	NetworKIN	0.0765489		AKT1	RTKN	S106	NetworKIN	-0.28036		AKT1	RTKN	S106	NetworKIN	-0.0985377
		AKT1	CRKL	S107	NetworKIN	-0.364823		AKT1	CRKL	S107	NetworKIN	-0.0230303		AKT1	CRKL	S107	NetworKIN	-0.463719		AKT1	CRKL	S107	NetworKIN	0.0472695
		AKT1	IRS1	S1100	NetworKIN	-0.129783		AKT1	IRS1	S1100	NetworKIN	-0.258157		AKT1	IRS1	S1100	NetworKIN	-0.0389021		AKT1	IRS1	S1100	NetworKIN	-0.0100686
		AKT1	IRS2	S1100	NetworKIN	-0.172896		AKT1	IRS2	S1100	NetworKIN	0.0354872		AKT1	IRS2	S1100	NetworKIN	-0.0253578		AKT1	IRS2	S1100	NetworKIN	0.101172
		AKT1	TSC2	S1132	NetworKIN	-0.112434		AKT1	TSC2	S1132	NetworKIN	1.22552		AKT1	TSC2	S1132	NetworKIN	0.307695		AKT1	TSC2	S1132	NetworKIN	-0.192945
		AKT1	SOS1	S1134	NetworKIN	0.557437		AKT1	SOS1	S1134	NetworKIN	0.612348		AKT1	SOS1	S1134	NetworKIN	0.164845		AKT1	SOS1	S1134	NetworKIN	0.47144
		AKT1	AKT1	S124	NetworKIN	-0.195004		AKT1	AKT1	S124	NetworKIN	-0.0287572		AKT1	AKT1	S124	NetworKIN	-0.199384		AKT1	AKT1	S124	NetworKIN	0.219376
		AKT1	MTOR	S1261	NetworKIN	1.57622		AKT1	MTOR	S1261	NetworKIN	0.481325		AKT1	MTOR	S1261	NetworKIN	0.0617946		AKT1	MTOR	S1261	NetworKIN	0.356927
		AKT1	WNK1	S1261	NetworKIN	0.0400851		AKT1	WNK1	S1261	NetworKIN	0.0389458		AKT1	WNK1	S1261	NetworKIN	0.0426778		AKT1	WNK1	S1261	NetworKIN	0.178494
		AKT1	SOS1	S1275	NetworKIN	0.0636417		AKT1	SOS1	S1275	NetworKIN	0.301386		AKT1	SOS1	S1275	NetworKIN	0.0169862		AKT1	SOS1	S1275	NetworKIN	0.306235
		AKT1	ARHGEF12	S1288	NetworKIN	0.438744		AKT1	ARHGEF12	S1288	NetworKIN	0.814483		AKT1	ARHGEF12	S1288	NetworKIN	0.217197		AKT1	ARHGEF12	S1288	NetworKIN	0.376865
		AKT1	RICTOR	S1302	NetworKIN	0.119216		AKT1	RICTOR	S1302	NetworKIN	0.101687		AKT1	RICTOR	S1302	NetworKIN	0.109608		AKT1	RICTOR	S1302	NetworKIN	0.193756
		AKT1	INPPL1	S132	NetworKIN	-0.101214		AKT1	INPPL1	S132	NetworKIN	-0.0883583		AKT1	INPPL1	S132	NetworKIN	0.0318894		AKT1	INPPL1	S132	NetworKIN	0.0392569
		AKT1	BAD	S134	NetworKIN	1.14603		AKT1	BAD	S134	NetworKIN	0.447423		AKT1	BAD	S134	NetworKIN	0.780367		AKT1	BAD	S134	NetworKIN	0.138749
		AKT1	TSC2	S1364	NetworKIN	0.195625		AKT1	TSC2	S1364	NetworKIN	0.563529		AKT1	TSC2	S1364	NetworKIN	0.0544231		AKT1	TSC2	S1364	NetworKIN	0.358872
		AKT1	RICTOR	S1388	NetworKIN	-0.560385		AKT1	RICTOR	S1388	NetworKIN	-0.44088		AKT1	RICTOR	S1388	NetworKIN	-0.319554		AKT1	RICTOR	S1388	NetworKIN	-0.249398
		AKT1	SPRY2	S139	NetworKIN	-0.479588		AKT1	SPRY2	S139	NetworKIN	-0.22009		AKT1	SPRY2	S139	NetworKIN	-0.189933		AKT1	SPRY2	S139	NetworKIN	-0.290891
		AKT1	NOS1	S1417	NetworKIN	-0.600529		AKT1	NOS1	S1417	NetworKIN	-0.158303		AKT1	NOS1	S1417	NetworKIN	-0.206982		AKT1	NOS1	S1417	NetworKIN	-0.295788
		AKT1	ZYX	S143	NetworKIN	0.317962		AKT1	ZYX	S143	NetworKIN	0.923156		AKT1	ZYX	S143	NetworKIN	-0.00292557		AKT1	ZYX	S143	NetworKIN	0.0442412
		AKT1	CUX1	S1454	NetworKIN	0.137958		AKT1	CUX1	S1454	NetworKIN	0.269585		AKT1	CUX1	S1454	NetworKIN	-0.279935		AKT1	CUX1	S1454	NetworKIN	-0.0142093
		AKT1	CLIP1	S147	NetworKIN	-0.331928		AKT1	CLIP1	S147	NetworKIN	-0.211063		AKT1	CLIP1	S147	NetworKIN	-0.434687		AKT1	CLIP1	S147	NetworKIN	-0.234944
		AKT1	HSPB1	S15	NetworKIN	0.907348		AKT1	HSPB1	S15	NetworKIN	1.06209		AKT1	HSPB1	S15	NetworKIN	-0.24272		AKT1	HSPB1	S15	NetworKIN	1.33422
		AKT1	IQGAP2	S16	NetworKIN	-0.171013		AKT1	IQGAP2	S16	NetworKIN	-0.0766263		AKT1	IQGAP2	S16	NetworKIN	-0.0653324		AKT1	IQGAP2	S16	NetworKIN	-0.213029
		AKT1	WNK1	S167	NetworKIN	-0.286921		AKT1	WNK1	S167	NetworKIN	0.300966		AKT1	WNK1	S167	NetworKIN	-0.235714		AKT1	WNK1	S167	NetworKIN	0.26759
		AKT1	CDC42EP1	S192	NetworKIN	-0.181416		AKT1	CDC42EP1	S192	NetworKIN	-0.250484		AKT1	CDC42EP1	S192	NetworKIN	-0.227713		AKT1	CDC42EP1	S192	NetworKIN	-0.165799
		AKT1	CREBBP	S2063	NetworKIN	0.324265		AKT1	CREBBP	S2063	NetworKIN	0.0663711		AKT1	CREBBP	S2063	NetworKIN	0.501822		AKT1	CREBBP	S2063	NetworKIN	-0.000141703
		AKT1	RICTOR	S21	NetworKIN	-0.176442		AKT1	RICTOR	S21	NetworKIN	-0.223434		AKT1	RICTOR	S21	NetworKIN	-0.0227678		AKT1	RICTOR	S21	NetworKIN	-0.0848639
		AKT1	GAB2	S210	NetworKIN	-0.310044		AKT1	GAB2	S210	NetworKIN	-0.225817		AKT1	GAB2	S210	NetworKIN	-0.204737		AKT1	GAB2	S210	NetworKIN	-0.124779
		AKT1	ABI1	S222	NetworKIN	0.0711465		AKT1	ABI1	S222	NetworKIN	0.136585		AKT1	ABI1	S222	NetworKIN	-0.210511		AKT1	ABI1	S222	NetworKIN	-0.211338
		AKT1	HSP90AB1	S226	NetworKIN	-0.0560255		AKT1	HSP90AB1	S226	NetworKIN	-0.0393757		AKT1	HSP90AB1	S226	NetworKIN	-0.0701832		AKT1	HSP90AB1	S226	NetworKIN	0.20145
		AKT1	ABI1	S231	NetworKIN	0.190754		AKT1	ABI1	S231	NetworKIN	-0.00156024		AKT1	ABI1	S231	NetworKIN	-0.0210305		AKT1	ABI1	S231	NetworKIN	0.0505604
		AKT1	RTKN	S232	NetworKIN	0.173268		AKT1	RTKN	S232	NetworKIN	0.00568039		AKT1	RTKN	S232	NetworKIN	0.210618		AKT1	RTKN	S232	NetworKIN	0.0923307
		AKT1	VASP	S239	NetworKIN	-0.218445		AKT1	VASP	S239	NetworKIN	-0.0670128		AKT1	VASP	S239	NetworKIN	-0.195437		AKT1	VASP	S239	NetworKIN	-0.214463
		AKT1	PDPK1	S241	NetworKIN	-0.255166		AKT1	PDPK1	S241	NetworKIN	-0.327624		AKT1	PDPK1	S241	NetworKIN	-0.20333		AKT1	PDPK1	S241	NetworKIN	-0.126543
		AKT1	PPP1R3D	S25	NetworKIN	-0.162785		AKT1	PPP1R3D	S25	NetworKIN	0.0887308		AKT1	PPP1R3D	S25	NetworKIN	-0.162674		AKT1	PPP1R3D	S25	NetworKIN	0.133935
		AKT1	PXN	S250	NetworKIN	1.54851		AKT1	PXN	S250	NetworKIN	1.10272		AKT1	PXN	S250	NetworKIN	1.45694		AKT1	PXN	S250	NetworKIN	1.87652
		AKT1	RAF1	S259	NetworKIN	0.0704419		AKT1	RAF1	S259	NetworKIN	0.221194		AKT1	RAF1	S259	NetworKIN	-0.06939		AKT1	RAF1	S259	NetworKIN	0.139441
		AKT1	SIRT1	S27	NetworKIN	-0.0920039		AKT1	SIRT1	S27	NetworKIN	-0.0314975		AKT1	SIRT1	S27	NetworKIN	-0.0931311		AKT1	SIRT1	S27	NetworKIN	-0.0496328
		AKT1	IRS1	S270	NetworKIN	0.0203466		AKT1	IRS1	S270	NetworKIN	0.0346936		AKT1	IRS1	S270	NetworKIN	-0.295139		AKT1	IRS1	S270	NetworKIN	-0.241222
		AKT1	SLC9A3R1	S290	NetworKIN	-0.222462		AKT1	SLC9A3R1	S290	NetworKIN	0.152546		AKT1	SLC9A3R1	S290	NetworKIN	-0.26415		AKT1	SLC9A3R1	S290	NetworKIN	0.149848
		AKT1	VCL	S290	NetworKIN	0.122215		AKT1	VCL	S290	NetworKIN	-0.0837209		AKT1	VCL	S290	NetworKIN	-0.0587847		AKT1	VCL	S290	NetworKIN	-0.0446463
		AKT1	SMARCC2	S302	NetworKIN	0.0878032		AKT1	SMARCC2	S302	NetworKIN	0.045992		AKT1	SMARCC2	S302	NetworKIN	0.114716		AKT1	SMARCC2	S302	NetworKIN	-0.0264572
		AKT1	IRS1	S307	NetworKIN	0.265831		AKT1	IRS1	S307	NetworKIN	0.207767		AKT1	IRS1	S307	NetworKIN	-0.543854		AKT1	IRS1	S307	NetworKIN	-0.0853991
		AKT1	PDE3A	S312	NetworKIN	-0.0570982		AKT1	PDE3A	S312	NetworKIN	0.00450054		AKT1	PDE3A	S312	NetworKIN	-0.281673		AKT1	PDE3A	S312	NetworKIN	-0.0362832
		AKT1	FOXO3	S315	NetworKIN	0.282828		AKT1	FOXO3	S315	NetworKIN	0.103762		AKT1	FOXO3	S315	NetworKIN	0.745378		AKT1	FOXO3	S315	NetworKIN	0.405516
		AKT1	CARHSP1	S32	NetworKIN	0.900782		AKT1	CARHSP1	S32	NetworKIN	0.419829		AKT1	CARHSP1	S32	NetworKIN	0.86037		AKT1	CARHSP1	S32	NetworKIN	0.282712
		AKT1	SMARCC1	S328	NetworKIN	-0.107192		AKT1	SMARCC1	S328	NetworKIN	-0.189527		AKT1	SMARCC1	S328	NetworKIN	-0.172626		AKT1	SMARCC1	S328	NetworKIN	-0.149136
		AKT1	TBC1D4	S341	NetworKIN	-0.0804043		AKT1	TBC1D4	S341	NetworKIN	-0.13684		AKT1	TBC1D4	S341	NetworKIN	-0.0128324		AKT1	TBC1D4	S341	NetworKIN	0.154523
		AKT1	VCL	S346	NetworKIN	-0.131886		AKT1	VCL	S346	NetworKIN	0.0462275		AKT1	VCL	S346	NetworKIN	-0.0595691		AKT1	VCL	S346	NetworKIN	0.0836099
		AKT1	CLIP1	S348	NetworKIN	-0.646233		AKT1	CLIP1	S348	NetworKIN	0.425052		AKT1	CLIP1	S348	NetworKIN	0.0311606		AKT1	CLIP1	S348	NetworKIN	-0.440843
		AKT1	CTNND1	S349	NetworKIN	0.258846		AKT1	CTNND1	S349	NetworKIN	-0.328688		AKT1	CTNND1	S349	NetworKIN	0.213249		AKT1	CTNND1	S349	NetworKIN	0.24045
		AKT1	ARHGEF12	S41	NetworKIN	-0.0366862		AKT1	ARHGEF12	S41	NetworKIN	0.112637		AKT1	ARHGEF12	S41	NetworKIN	-0.0619011		AKT1	ARHGEF12	S41	NetworKIN	0.186331
		AKT1	RAF1	S43	NetworKIN	0.116785		AKT1	RAF1	S43	NetworKIN	-0.0508473		AKT1	RAF1	S43	NetworKIN	0.0418492		AKT1	RAF1	S43	NetworKIN	0.137959
		AKT1	CRTC2	S433	NetworKIN	0.740869		AKT1	CRTC2	S433	NetworKIN	0.458386		AKT1	CRTC2	S433	NetworKIN	0.275868		AKT1	CRTC2	S433	NetworKIN	0.433993
		AKT1	RPS6KB1	S441	NetworKIN	0.0442686		AKT1	RPS6KB1	S441	NetworKIN	0.219326		AKT1	RPS6KB1	S441	NetworKIN	0.208453		AKT1	RPS6KB1	S441	NetworKIN	0.313068
		AKT1	PPP1R3A	S46	NetworKIN	-0.028448		AKT1	PPP1R3A	S46	NetworKIN	0.0408916		AKT1	PPP1R3A	S46	NetworKIN	-0.233815		AKT1	PPP1R3A	S46	NetworKIN	0.0742713
		AKT1	RNF31	S466	NetworKIN	-0.150411		AKT1	RNF31	S466	NetworKIN	-0.0543177		AKT1	RNF31	S466	NetworKIN	-0.208288		AKT1	RNF31	S466	NetworKIN	0.0351001
		AKT1	SLC2A1	S473	NetworKIN	0.57497		AKT1	SLC2A1	S473	NetworKIN	0.37921		AKT1	SLC2A1	S473	NetworKIN	0.528316		AKT1	SLC2A1	S473	NetworKIN	-0.341879
		AKT1	FHOD1	S486	NetworKIN	0.0862618		AKT1	FHOD1	S486	NetworKIN	-0.0168274		AKT1	FHOD1	S486	NetworKIN	-0.135083		AKT1	FHOD1	S486	NetworKIN	0.59947
		AKT1	SLC2A4	S488	NetworKIN	0.0254061		AKT1	SLC2A4	S488	NetworKIN	0.271042		AKT1	SLC2A4	S488	NetworKIN	0.00439387		AKT1	SLC2A4	S488	NetworKIN	0.319456
		AKT1	TSC1	S505	NetworKIN	-0.0957961		AKT1	TSC1	S505	NetworKIN	-0.303977		AKT1	TSC1	S505	NetworKIN	0.107126		AKT1	TSC1	S505	NetworKIN	0.290712
		AKT1	TBC1D1	S507	NetworKIN	-0.134486		AKT1	TBC1D1	S507	NetworKIN	0.16865		AKT1	TBC1D1	S507	NetworKIN	0.306695		AKT1	TBC1D1	S507	NetworKIN	-0.233715
		AKT1	MAPKAP1	S510	NetworKIN	0.0976694		AKT1	MAPKAP1	S510	NetworKIN	0.0972965		AKT1	MAPKAP1	S510	NetworKIN	0.0429123		AKT1	MAPKAP1	S510	NetworKIN	0.061583
		AKT1	IRS1	S527	NetworKIN	0.0507815		AKT1	IRS1	S527	NetworKIN	0.159662		AKT1	IRS1	S527	NetworKIN	-0.348206		AKT1	IRS1	S527	NetworKIN	0.151421
		AKT1	PSMA5	S56	NetworKIN	0.0561409		AKT1	PSMA5	S56	NetworKIN	0.802859		AKT1	PSMA5	S56	NetworKIN	-0.149377		AKT1	PSMA5	S56	NetworKIN	0.480335
		AKT1	IRS2	S560	NetworKIN	-0.111161		AKT1	IRS2	S560	NetworKIN	-0.138851		AKT1	IRS2	S560	NetworKIN	0.00682105		AKT1	IRS2	S560	NetworKIN	0.0657277
		AKT1	ACIN1	S561	NetworKIN	-0.00361545		AKT1	ACIN1	S561	NetworKIN	0.00186809		AKT1	ACIN1	S561	NetworKIN	-0.0807472		AKT1	ACIN1	S561	NetworKIN	0.0385569
		AKT1	TBC1D4	S570	NetworKIN	-0.0721877		AKT1	TBC1D4	S570	NetworKIN	-0.764335		AKT1	TBC1D4	S570	NetworKIN	0.230664		AKT1	TBC1D4	S570	NetworKIN	0.172922
		AKT1	IRS2	S577	NetworKIN	-0.128507		AKT1	IRS2	S577	NetworKIN	0.0115757		AKT1	IRS2	S577	NetworKIN	0.415537		AKT1	IRS2	S577	NetworKIN	0.0934234
		AKT1	PKN2	S583	NetworKIN	-0.00539347		AKT1	PKN2	S583	NetworKIN	0.160281		AKT1	PKN2	S583	NetworKIN	-0.453926		AKT1	PKN2	S583	NetworKIN	-0.27182
		AKT1	NOS3	S633	NetworKIN	0.545305		AKT1	NOS3	S633	NetworKIN	0.961529		AKT1	NOS3	S633	NetworKIN	0.0557009		AKT1	NOS3	S633	NetworKIN	0.360194
		AKT1	GYS1	S641	NetworKIN	-0.138167		AKT1	GYS1	S641	NetworKIN	0.119376		AKT1	GYS1	S641	NetworKIN	0.00964814		AKT1	GYS1	S641	NetworKIN	0.136423
		AKT1	PPP1R3A	S65	NetworKIN	-0.118773		AKT1	PPP1R3A	S65	NetworKIN	0.338162		AKT1	PPP1R3A	S65	NetworKIN	0.0327994		AKT1	PPP1R3A	S65	NetworKIN	0.226677
		AKT1	GYS1	S653	NetworKIN	0.734321		AKT1	GYS1	S653	NetworKIN	0.0189467		AKT1	GYS1	S653	NetworKIN	0.552665		AKT1	GYS1	S653	NetworKIN	0.306924
		AKT1	TBC1D4	S673	NetworKIN	0.314735		AKT1	TBC1D4	S673	NetworKIN	-0.20516		AKT1	TBC1D4	S673	NetworKIN	-0.0712016		AKT1	TBC1D4	S673	NetworKIN	0.00340674
		AKT1	PRKCQ	S685	NetworKIN	0.198311		AKT1	PRKCQ	S685	NetworKIN	0.106791		AKT1	PRKCQ	S685	NetworKIN	-0.197913		AKT1	PRKCQ	S685	NetworKIN	-0.21817
		AKT1	PRKCQ	S695	NetworKIN	-0.047501		AKT1	PRKCQ	S695	NetworKIN	0.0532247		AKT1	PRKCQ	S695	NetworKIN	-0.214765		AKT1	PRKCQ	S695	NetworKIN	-0.0174269
		AKT1	GYS1	S698	NetworKIN	-0.864067		AKT1	GYS1	S698	NetworKIN	-0.126096		AKT1	GYS1	S698	NetworKIN	-0.225298		AKT1	GYS1	S698	NetworKIN	0.414876
		AKT1	USP8	S718	NetworKIN	0.198816		AKT1	USP8	S718	NetworKIN	-0.163726		AKT1	USP8	S718	NetworKIN	0.0110418		AKT1	USP8	S718	NetworKIN	0.0122543
		AKT1	RPTOR	S721	NetworKIN	-0.521653		AKT1	RPTOR	S721	NetworKIN	-0.0689629		AKT1	RPTOR	S721	NetworKIN	-0.119684		AKT1	RPTOR	S721	NetworKIN	-0.0176513
		AKT1	PPP1R3D	S74	NetworKIN	-0.486749		AKT1	PPP1R3D	S74	NetworKIN	-0.0337943		AKT1	PPP1R3D	S74	NetworKIN	-0.0988894		AKT1	PPP1R3D	S74	NetworKIN	-0.0645387
		AKT1	RASGRF2	S746	NetworKIN	0.0754875		AKT1	RASGRF2	S746	NetworKIN	0.0891536		AKT1	RASGRF2	S746	NetworKIN	-0.184325		AKT1	RASGRF2	S746	NetworKIN	0.206212
		AKT1	BAD	S75	NetworKIN	0.0232766		AKT1	BAD	S75	NetworKIN	0.511905		AKT1	BAD	S75	NetworKIN	-0.344185		AKT1	BAD	S75	NetworKIN	0.167307
		AKT1	HSPA4	S76	NetworKIN	-0.0543045		AKT1	HSPA4	S76	NetworKIN	0.0211853		AKT1	HSPA4	S76	NetworKIN	-0.0258746		AKT1	HSPA4	S76	NetworKIN	-0.129847
		AKT1	PDCD4	S76	NetworKIN	0.108664		AKT1	PDCD4	S76	NetworKIN	0.0113339		AKT1	PDCD4	S76	NetworKIN	0.0470858		AKT1	PDCD4	S76	NetworKIN	0.24811
		AKT1	VCP	S775	NetworKIN	-0.710696		AKT1	VCP	S775	NetworKIN	-0.134878		AKT1	VCP	S775	NetworKIN	-0.484725		AKT1	VCP	S775	NetworKIN	-0.601747
		AKT1	PPP1R3D	S78	NetworKIN	0.664543		AKT1	PPP1R3D	S78	NetworKIN	0.198361		AKT1	PPP1R3D	S78	NetworKIN	0.209016		AKT1	PPP1R3D	S78	NetworKIN	-0.047074
		AKT1	PARP1	S782	NetworKIN	0.55616		AKT1	PARP1	S782	NetworKIN	0.296943		AKT1	PARP1	S782	NetworKIN	0.365682		AKT1	PARP1	S782	NetworKIN	0.210788
		AKT1	ACIN1	S825	NetworKIN	-0.670558		AKT1	ACIN1	S825	NetworKIN	0.00826548		AKT1	ACIN1	S825	NetworKIN	-0.257889		AKT1	ACIN1	S825	NetworKIN	-0.229046
		AKT1	NCK1	S85	NetworKIN	-0.180263		AKT1	NCK1	S85	NetworKIN	-0.0940062		AKT1	NCK1	S85	NetworKIN	-0.296493		AKT1	NCK1	S85	NetworKIN	-0.089135
		AKT1	NOS1	S852	NetworKIN	0.986083		AKT1	NOS1	S852	NetworKIN	0.638822		AKT1	NOS1	S852	NetworKIN	-0.277288		AKT1	NOS1	S852	NetworKIN	-0.042151
		AKT1	PRKDC	S893	NetworKIN	-0.200063		AKT1	PRKDC	S893	NetworKIN	-0.0227256		AKT1	PRKDC	S893	NetworKIN	-0.420437		AKT1	PRKDC	S893	NetworKIN	-0.155956
		AKT1	NCOR2	S939	NetworKIN	0.107379		AKT1	NCOR2	S939	NetworKIN	0.373819		AKT1	NCOR2	S939	NetworKIN	0.0828896		AKT1	NCOR2	S939	NetworKIN	0.306654
		AKT1	ARHGAP29	S949	NetworKIN	0.039524		AKT1	ARHGAP29	S949	NetworKIN	0.0405027		AKT1	ARHGAP29	S949	NetworKIN	-0.17595		AKT1	ARHGAP29	S949	NetworKIN	0.028273
		AKT1	FLNA	T2336	NetworKIN	0.0676632		AKT1	FLNA	T2336	NetworKIN	0.543976		AKT1	FLNA	T2336	NetworKIN	-0.0431227		AKT1	FLNA	T2336	NetworKIN	-0.0215791
		AKT1	NGFR	T293	NetworKIN	-0.394566		AKT1	NGFR	T293	NetworKIN	-0.349327		AKT1	NGFR	T293	NetworKIN	-0.769933		AKT1	NGFR	T293	NetworKIN	-0.20237
		AKT1	CTNND1	T310	NetworKIN	0.948711		AKT1	CTNND1	T310	NetworKIN	0.132261		AKT1	CTNND1	T310	NetworKIN	1.58749		AKT1	CTNND1	T310	NetworKIN	1.51568
		AKT1	GAB2	T391	NetworKIN	-0.16736		AKT1	GAB2	T391	NetworKIN	0.0560712		AKT1	GAB2	T391	NetworKIN	-0.28482		AKT1	GAB2	T391	NetworKIN	-0.148391
		AKT1	CTTN	T399	NetworKIN	-0.117955		AKT1	CTTN	T399	NetworKIN	-0.155069		AKT1	CTTN	T399	NetworKIN	-0.168568		AKT1	CTTN	T399	NetworKIN	-0.20244
		AKT1	CTTN	T401	NetworKIN	0.0769098		AKT1	CTTN	T401	NetworKIN	0.194364		AKT1	CTTN	T401	NetworKIN	0.0559585		AKT1	CTTN	T401	NetworKIN	0.0911303
		AKT1	TBC1D1	T505	NetworKIN	-0.772082		AKT1	TBC1D1	T505	NetworKIN	-0.674556		AKT1	TBC1D1	T505	NetworKIN	-0.241874		AKT1	TBC1D1	T505	NetworKIN	-0.456485
		AKT1	EIF4EBP1	T68	NetworKIN	0.407571		AKT1	EIF4EBP1	T68	NetworKIN	0.636081		AKT1	EIF4EBP1	T68	NetworKIN	0.367748		AKT1	EIF4EBP1	T68	NetworKIN	0.200482
		AKT1	RALGAPA2	T715	NetworKIN	0.0906836		AKT1	RALGAPA2	T715	NetworKIN	-0.0453625		AKT1	RALGAPA2	T715	NetworKIN	-0.0761146		AKT1	RALGAPA2	T715	NetworKIN	0.0313821
		AKT1	PKN2	T816	NetworKIN	-0.138246		AKT1	PKN2	T816	NetworKIN	0.0274228		AKT1	PKN2	T816	NetworKIN	-0.251179		AKT1	PKN2	T816	NetworKIN	-0.0144856
		AKT1	INPPL1	T958	NetworKIN	0.478812		AKT1	INPPL1	T958	NetworKIN	0.718499		AKT1	INPPL1	T958	NetworKIN	-0.298695		AKT1	INPPL1	T958	NetworKIN	0.0820947
		AKT2	CDKN1B	S10	NetworKIN	-0.569669		AKT2	CDKN1B	S10	NetworKIN	-0.469392		AKT2	CDKN1B	S10	NetworKIN	-0.335243		AKT2	CDKN1B	S10	NetworKIN	-0.187349
		AKT2	IRS1	S1100	NetworKIN	-0.129783		AKT2	IRS1	S1100	NetworKIN	-0.258157		AKT2	IRS1	S1100	NetworKIN	-0.0389021		AKT2	IRS1	S1100	NetworKIN	-0.0100686
		AKT2	IRS2	S1100	NetworKIN	-0.172896		AKT2	IRS2	S1100	NetworKIN	0.0354872		AKT2	IRS2	S1100	NetworKIN	-0.0253578		AKT2	IRS2	S1100	NetworKIN	0.101172
		AKT2	TSC2	S1132	NetworKIN	-0.112434		AKT2	TSC2	S1132	NetworKIN	1.22552		AKT2	TSC2	S1132	NetworKIN	0.307695		AKT2	TSC2	S1132	NetworKIN	-0.192945
		AKT2	SOS1	S1134	NetworKIN	0.557437		AKT2	SOS1	S1134	NetworKIN	0.612348		AKT2	SOS1	S1134	NetworKIN	0.164845		AKT2	SOS1	S1134	NetworKIN	0.47144
		AKT2	AKT1	S124	NetworKIN	-0.195004		AKT2	AKT1	S124	NetworKIN	-0.0287572		AKT2	AKT1	S124	NetworKIN	-0.199384		AKT2	AKT1	S124	NetworKIN	0.219376
		AKT2	SOS1	S1275	NetworKIN	0.0636417		AKT2	SOS1	S1275	NetworKIN	0.301386		AKT2	SOS1	S1275	NetworKIN	0.0169862		AKT2	SOS1	S1275	NetworKIN	0.306235
		AKT2	INPPL1	S132	NetworKIN	-0.101214		AKT2	INPPL1	S132	NetworKIN	-0.0883583		AKT2	INPPL1	S132	NetworKIN	0.0318894		AKT2	INPPL1	S132	NetworKIN	0.0392569
		AKT2	BAD	S134	NetworKIN	1.14603		AKT2	BAD	S134	NetworKIN	0.447423		AKT2	BAD	S134	NetworKIN	0.780367		AKT2	BAD	S134	NetworKIN	0.138749
		AKT2	TSC2	S1364	NetworKIN	0.195625		AKT2	TSC2	S1364	NetworKIN	0.563529		AKT2	TSC2	S1364	NetworKIN	0.0544231		AKT2	TSC2	S1364	NetworKIN	0.358872
		AKT2	STX4	S14	NetworKIN	0.250312		AKT2	STX4	S14	NetworKIN	-0.0376809		AKT2	STX4	S14	NetworKIN	0.188462		AKT2	STX4	S14	NetworKIN	0.0789734
		AKT2	GSK3A	S21	NetworKIN	-0.0101347		AKT2	GSK3A	S21	NetworKIN	-0.033481		AKT2	GSK3A	S21	NetworKIN	-0.199225		AKT2	GSK3A	S21	NetworKIN	0.0790358
		AKT2	RICTOR	S21	NetworKIN	-0.176442		AKT2	RICTOR	S21	NetworKIN	-0.223434		AKT2	RICTOR	S21	NetworKIN	-0.0227678		AKT2	RICTOR	S21	NetworKIN	-0.0848639
		AKT2	PDPK1	S241	NetworKIN	-0.255166		AKT2	PDPK1	S241	NetworKIN	-0.327624		AKT2	PDPK1	S241	NetworKIN	-0.20333		AKT2	PDPK1	S241	NetworKIN	-0.126543
		AKT2	PPP1R3D	S25	NetworKIN	-0.162785		AKT2	PPP1R3D	S25	NetworKIN	0.0887308		AKT2	PPP1R3D	S25	NetworKIN	-0.162674		AKT2	PPP1R3D	S25	NetworKIN	0.133935
		AKT2	FOXO4	S262	NetworKIN	0.0711383		AKT2	FOXO4	S262	NetworKIN	0.000152726		AKT2	FOXO4	S262	NetworKIN	0.0126721		AKT2	FOXO4	S262	NetworKIN	0.120714
		AKT2	IRS1	S270	NetworKIN	0.0203466		AKT2	IRS1	S270	NetworKIN	0.0346936		AKT2	IRS1	S270	NetworKIN	-0.295139		AKT2	IRS1	S270	NetworKIN	-0.241222
		AKT2	IRS1	S307	NetworKIN	0.265831		AKT2	IRS1	S307	NetworKIN	0.207767		AKT2	IRS1	S307	NetworKIN	-0.543854		AKT2	IRS1	S307	NetworKIN	-0.0853991
		AKT2	PDE3A	S312	NetworKIN	-0.0570982		AKT2	PDE3A	S312	NetworKIN	0.00450054		AKT2	PDE3A	S312	NetworKIN	-0.281673		AKT2	PDE3A	S312	NetworKIN	-0.0362832
		AKT2	FOXO3	S315	NetworKIN	0.282828		AKT2	FOXO3	S315	NetworKIN	0.103762		AKT2	FOXO3	S315	NetworKIN	0.745378		AKT2	FOXO3	S315	NetworKIN	0.405516
		AKT2	TBC1D4	S318	NetworKIN	-0.109151		AKT2	TBC1D4	S318	NetworKIN	-0.274352		AKT2	TBC1D4	S318	NetworKIN	0.34508		AKT2	TBC1D4	S318	NetworKIN	0.299467
		AKT2	FOXO1	S319	NetworKIN	-0.197674		AKT2	FOXO1	S319	NetworKIN	-0.149638		AKT2	FOXO1	S319	NetworKIN	0.0168004		AKT2	FOXO1	S319	NetworKIN	0.167697
		AKT2	TBC1D4	S341	NetworKIN	-0.0804043		AKT2	TBC1D4	S341	NetworKIN	-0.13684		AKT2	TBC1D4	S341	NetworKIN	-0.0128324		AKT2	TBC1D4	S341	NetworKIN	0.154523
		AKT2	RPS6KB1	S441	NetworKIN	0.0442686		AKT2	RPS6KB1	S441	NetworKIN	0.219326		AKT2	RPS6KB1	S441	NetworKIN	0.208453		AKT2	RPS6KB1	S441	NetworKIN	0.313068
		AKT2	PPP1R3A	S46	NetworKIN	-0.028448		AKT2	PPP1R3A	S46	NetworKIN	0.0408916		AKT2	PPP1R3A	S46	NetworKIN	-0.233815		AKT2	PPP1R3A	S46	NetworKIN	0.0742713
		AKT2	SLC2A1	S473	NetworKIN	0.57497		AKT2	SLC2A1	S473	NetworKIN	0.37921		AKT2	SLC2A1	S473	NetworKIN	0.528316		AKT2	SLC2A1	S473	NetworKIN	-0.341879
		AKT2	SLC2A4	S488	NetworKIN	0.0254061		AKT2	SLC2A4	S488	NetworKIN	0.271042		AKT2	SLC2A4	S488	NetworKIN	0.00439387		AKT2	SLC2A4	S488	NetworKIN	0.319456
		AKT2	TSC1	S505	NetworKIN	-0.0957961		AKT2	TSC1	S505	NetworKIN	-0.303977		AKT2	TSC1	S505	NetworKIN	0.107126		AKT2	TSC1	S505	NetworKIN	0.290712
		AKT2	IRS1	S527	NetworKIN	0.0507815		AKT2	IRS1	S527	NetworKIN	0.159662		AKT2	IRS1	S527	NetworKIN	-0.348206		AKT2	IRS1	S527	NetworKIN	0.151421
		AKT2	IRS2	S560	NetworKIN	-0.111161		AKT2	IRS2	S560	NetworKIN	-0.138851		AKT2	IRS2	S560	NetworKIN	0.00682105		AKT2	IRS2	S560	NetworKIN	0.0657277
		AKT2	TBC1D4	S570	NetworKIN	-0.0721877		AKT2	TBC1D4	S570	NetworKIN	-0.764335		AKT2	TBC1D4	S570	NetworKIN	0.230664		AKT2	TBC1D4	S570	NetworKIN	0.172922
		AKT2	IRS2	S577	NetworKIN	-0.128507		AKT2	IRS2	S577	NetworKIN	0.0115757		AKT2	IRS2	S577	NetworKIN	0.415537		AKT2	IRS2	S577	NetworKIN	0.0934234
		AKT2	TBC1D4	S588	NetworKIN	0.4623		AKT2	TBC1D4	S588	NetworKIN	-0.0386128		AKT2	TBC1D4	S588	NetworKIN	0.15869		AKT2	TBC1D4	S588	NetworKIN	0.187784
		AKT2	IRS1	S629	NetworKIN	-0.287644		AKT2	IRS1	S629	NetworKIN	-0.148885		AKT2	IRS1	S629	NetworKIN	-0.21059		AKT2	IRS1	S629	NetworKIN	-0.399285
		AKT2	NOS3	S633	NetworKIN	0.545305		AKT2	NOS3	S633	NetworKIN	0.961529		AKT2	NOS3	S633	NetworKIN	0.0557009		AKT2	NOS3	S633	NetworKIN	0.360194
		AKT2	PPP1R3A	S65	NetworKIN	-0.118773		AKT2	PPP1R3A	S65	NetworKIN	0.338162		AKT2	PPP1R3A	S65	NetworKIN	0.0327994		AKT2	PPP1R3A	S65	NetworKIN	0.226677
		AKT2	TBC1D4	S673	NetworKIN	0.314735		AKT2	TBC1D4	S673	NetworKIN	-0.20516		AKT2	TBC1D4	S673	NetworKIN	-0.0712016		AKT2	TBC1D4	S673	NetworKIN	0.00340674
		AKT2	RPTOR	S721	NetworKIN	-0.521653		AKT2	RPTOR	S721	NetworKIN	-0.0689629		AKT2	RPTOR	S721	NetworKIN	-0.119684		AKT2	RPTOR	S721	NetworKIN	-0.0176513
		AKT2	PPP1R3D	S74	NetworKIN	-0.486749		AKT2	PPP1R3D	S74	NetworKIN	-0.0337943		AKT2	PPP1R3D	S74	NetworKIN	-0.0988894		AKT2	PPP1R3D	S74	NetworKIN	-0.0645387
		AKT2	BAD	S75	NetworKIN	0.0232766		AKT2	BAD	S75	NetworKIN	0.511905		AKT2	BAD	S75	NetworKIN	-0.344185		AKT2	BAD	S75	NetworKIN	0.167307
		AKT2	PPP1R3D	S78	NetworKIN	0.664543		AKT2	PPP1R3D	S78	NetworKIN	0.198361		AKT2	PPP1R3D	S78	NetworKIN	0.209016		AKT2	PPP1R3D	S78	NetworKIN	-0.047074
		AKT2	PRKDC	S893	NetworKIN	-0.200063		AKT2	PRKDC	S893	NetworKIN	-0.0227256		AKT2	PRKDC	S893	NetworKIN	-0.420437		AKT2	PRKDC	S893	NetworKIN	-0.155956
		AKT2	TSC2	S939	NetworKIN	-0.105677		AKT2	TSC2	S939	NetworKIN	-0.308654		AKT2	TSC2	S939	NetworKIN	-0.0952403		AKT2	TSC2	S939	NetworKIN	-0.149827
		AKT2	TBC1D4	T642	NetworKIN	-0.0731599		AKT2	TBC1D4	T642	NetworKIN	-0.211306		AKT2	TBC1D4	T642	NetworKIN	-0.243452		AKT2	TBC1D4	T642	NetworKIN	-0.0190723
		AKT2	RALGAPA2	T715	NetworKIN	0.0906836		AKT2	RALGAPA2	T715	NetworKIN	-0.0453625		AKT2	RALGAPA2	T715	NetworKIN	-0.0761146		AKT2	RALGAPA2	T715	NetworKIN	0.0313821
		AKT2	INPPL1	T958	NetworKIN	0.478812		AKT2	INPPL1	T958	NetworKIN	0.718499		AKT2	INPPL1	T958	NetworKIN	-0.298695		AKT2	INPPL1	T958	NetworKIN	0.0820947
		AKT3	CDKN1B	S10	NetworKIN	-0.569669		AKT3	CDKN1B	S10	NetworKIN	-0.469392		AKT3	CDKN1B	S10	NetworKIN	-0.335243		AKT3	CDKN1B	S10	NetworKIN	-0.187349
		AKT3	IRS2	S1100	NetworKIN	-0.172896		AKT3	IRS2	S1100	NetworKIN	0.0354872		AKT3	IRS2	S1100	NetworKIN	-0.0253578		AKT3	IRS2	S1100	NetworKIN	0.101172
		AKT3	TSC2	S1132	NetworKIN	-0.112434		AKT3	TSC2	S1132	NetworKIN	1.22552		AKT3	TSC2	S1132	NetworKIN	0.307695		AKT3	TSC2	S1132	NetworKIN	-0.192945
		AKT3	SOS1	S1134	NetworKIN	0.557437		AKT3	SOS1	S1134	NetworKIN	0.612348		AKT3	SOS1	S1134	NetworKIN	0.164845		AKT3	SOS1	S1134	NetworKIN	0.47144
		AKT3	SOS1	S1275	NetworKIN	0.0636417		AKT3	SOS1	S1275	NetworKIN	0.301386		AKT3	SOS1	S1275	NetworKIN	0.0169862		AKT3	SOS1	S1275	NetworKIN	0.306235
		AKT3	BAD	S134	NetworKIN	1.14603		AKT3	BAD	S134	NetworKIN	0.447423		AKT3	BAD	S134	NetworKIN	0.780367		AKT3	BAD	S134	NetworKIN	0.138749
		AKT3	TSC2	S1364	NetworKIN	0.195625		AKT3	TSC2	S1364	NetworKIN	0.563529		AKT3	TSC2	S1364	NetworKIN	0.0544231		AKT3	TSC2	S1364	NetworKIN	0.358872
		AKT3	GSK3A	S21	NetworKIN	-0.0101347		AKT3	GSK3A	S21	NetworKIN	-0.033481		AKT3	GSK3A	S21	NetworKIN	-0.199225		AKT3	GSK3A	S21	NetworKIN	0.0790358
		AKT3	PDPK1	S241	NetworKIN	-0.255166		AKT3	PDPK1	S241	NetworKIN	-0.327624		AKT3	PDPK1	S241	NetworKIN	-0.20333		AKT3	PDPK1	S241	NetworKIN	-0.126543
		AKT3	PPP1R3D	S25	NetworKIN	-0.162785		AKT3	PPP1R3D	S25	NetworKIN	0.0887308		AKT3	PPP1R3D	S25	NetworKIN	-0.162674		AKT3	PPP1R3D	S25	NetworKIN	0.133935
		AKT3	PDE3A	S312	NetworKIN	-0.0570982		AKT3	PDE3A	S312	NetworKIN	0.00450054		AKT3	PDE3A	S312	NetworKIN	-0.281673		AKT3	PDE3A	S312	NetworKIN	-0.0362832
		AKT3	FOXO3	S315	NetworKIN	0.282828		AKT3	FOXO3	S315	NetworKIN	0.103762		AKT3	FOXO3	S315	NetworKIN	0.745378		AKT3	FOXO3	S315	NetworKIN	0.405516
		AKT3	FOXO1	S319	NetworKIN	-0.197674		AKT3	FOXO1	S319	NetworKIN	-0.149638		AKT3	FOXO1	S319	NetworKIN	0.0168004		AKT3	FOXO1	S319	NetworKIN	0.167697
		AKT3	RPS6KB1	S441	NetworKIN	0.0442686		AKT3	RPS6KB1	S441	NetworKIN	0.219326		AKT3	RPS6KB1	S441	NetworKIN	0.208453		AKT3	RPS6KB1	S441	NetworKIN	0.313068
		AKT3	PPP1R3A	S46	NetworKIN	-0.028448		AKT3	PPP1R3A	S46	NetworKIN	0.0408916		AKT3	PPP1R3A	S46	NetworKIN	-0.233815		AKT3	PPP1R3A	S46	NetworKIN	0.0742713
		AKT3	SLC2A4	S488	NetworKIN	0.0254061		AKT3	SLC2A4	S488	NetworKIN	0.271042		AKT3	SLC2A4	S488	NetworKIN	0.00439387		AKT3	SLC2A4	S488	NetworKIN	0.319456
		AKT3	IRS2	S560	NetworKIN	-0.111161		AKT3	IRS2	S560	NetworKIN	-0.138851		AKT3	IRS2	S560	NetworKIN	0.00682105		AKT3	IRS2	S560	NetworKIN	0.0657277
		AKT3	IRS2	S577	NetworKIN	-0.128507		AKT3	IRS2	S577	NetworKIN	0.0115757		AKT3	IRS2	S577	NetworKIN	0.415537		AKT3	IRS2	S577	NetworKIN	0.0934234
		AKT3	NOS3	S633	NetworKIN	0.545305		AKT3	NOS3	S633	NetworKIN	0.961529		AKT3	NOS3	S633	NetworKIN	0.0557009		AKT3	NOS3	S633	NetworKIN	0.360194
		AKT3	PPP1R3A	S65	NetworKIN	-0.118773		AKT3	PPP1R3A	S65	NetworKIN	0.338162		AKT3	PPP1R3A	S65	NetworKIN	0.0327994		AKT3	PPP1R3A	S65	NetworKIN	0.226677
		AKT3	PPP1R3D	S74	NetworKIN	-0.486749		AKT3	PPP1R3D	S74	NetworKIN	-0.0337943		AKT3	PPP1R3D	S74	NetworKIN	-0.0988894		AKT3	PPP1R3D	S74	NetworKIN	-0.0645387
		AKT3	BAD	S75	NetworKIN	0.0232766		AKT3	BAD	S75	NetworKIN	0.511905		AKT3	BAD	S75	NetworKIN	-0.344185		AKT3	BAD	S75	NetworKIN	0.167307
		AKT3	PPP1R3D	S78	NetworKIN	0.664543		AKT3	PPP1R3D	S78	NetworKIN	0.198361		AKT3	PPP1R3D	S78	NetworKIN	0.209016		AKT3	PPP1R3D	S78	NetworKIN	-0.047074
		AKT3	TSC2	S939	NetworKIN	-0.105677		AKT3	TSC2	S939	NetworKIN	-0.308654		AKT3	TSC2	S939	NetworKIN	-0.0952403		AKT3	TSC2	S939	NetworKIN	-0.149827
		AKT3	PRKCD	T507	NetworKIN	0.191672		AKT3	PRKCD	T507	NetworKIN	0.938173		AKT3	PRKCD	T507	NetworKIN	0.260866		AKT3	PRKCD	T507	NetworKIN	0.574973
		ARAF	UBA1	S13	NetworKIN	-0.0049924		ARAF	UBA1	S13	NetworKIN	0.0425209		ARAF	UBA1	S13	NetworKIN	-0.0667518		ARAF	UBA1	S13	NetworKIN	0.163613
		ARAF	HERC1	S1428	NetworKIN	-0.127209		ARAF	HERC1	S1428	NetworKIN	0.0229128		ARAF	HERC1	S1428	NetworKIN	-0.133922		ARAF	HERC1	S1428	NetworKIN	0.0949662
		ARAF	HERC1	S1510	NetworKIN	0.256242		ARAF	HERC1	S1510	NetworKIN	0.169493		ARAF	HERC1	S1510	NetworKIN	0.11508		ARAF	HERC1	S1510	NetworKIN	0.0943323
		ARAF	ARAF	S157	NetworKIN	0.0217063		ARAF	ARAF	S157	NetworKIN	-0.149575		ARAF	ARAF	S157	NetworKIN	0.0699631		ARAF	ARAF	S157	NetworKIN	0.0814378
		ARAF	ARAF	S186	NetworKIN	0.544552		ARAF	ARAF	S186	NetworKIN	0.156059		ARAF	ARAF	S186	NetworKIN	0.609365		ARAF	ARAF	S186	NetworKIN	0.434942
		ARAF	MAP2K2	S222	NetworKIN	-0.0296447		ARAF	MAP2K2	S222	NetworKIN	0.451418		ARAF	MAP2K2	S222	NetworKIN	-0.0583044		ARAF	MAP2K2	S222	NetworKIN	0.478452
		ARAF	MAP2K2	S226	NetworKIN	0.444002		ARAF	MAP2K2	S226	NetworKIN	0.24538		ARAF	MAP2K2	S226	NetworKIN	-0.150167		ARAF	MAP2K2	S226	NetworKIN	-0.00304244
		ARAF	PRKCA	S226	NetworKIN	0.18256		ARAF	PRKCA	S226	NetworKIN	0.0907752		ARAF	PRKCA	S226	NetworKIN	0.0478914		ARAF	PRKCA	S226	NetworKIN	0.218535
		ARAF	MAP2K2	S23	NetworKIN	0.581502		ARAF	MAP2K2	S23	NetworKIN	1.17067		ARAF	MAP2K2	S23	NetworKIN	-0.118226		ARAF	MAP2K2	S23	NetworKIN	1.59867
		ARAF	ARAF	S257	NetworKIN	-0.545246		ARAF	ARAF	S257	NetworKIN	-0.902234		ARAF	ARAF	S257	NetworKIN	0.0135065		ARAF	ARAF	S257	NetworKIN	-0.306749
		ARAF	PRKCA	S319	NetworKIN	0.395863		ARAF	PRKCA	S319	NetworKIN	0.51577		ARAF	PRKCA	S319	NetworKIN	0.236552		ARAF	PRKCA	S319	NetworKIN	0.426276
		ARAF	BRAF	S365	NetworKIN	-0.212198		ARAF	BRAF	S365	NetworKIN	-0.125787		ARAF	BRAF	S365	NetworKIN	-0.260644		ARAF	BRAF	S365	NetworKIN	0.00109932
		ARAF	PRKCE	S368	NetworKIN	-0.809184		ARAF	PRKCE	S368	NetworKIN	-0.332645		ARAF	PRKCE	S368	NetworKIN	-0.412285		ARAF	PRKCE	S368	NetworKIN	-0.605137
		ARAF	UBA1	S46	NetworKIN	0.631978		ARAF	UBA1	S46	NetworKIN	0.0677741		ARAF	UBA1	S46	NetworKIN	0.491575		ARAF	UBA1	S46	NetworKIN	0.0443531
		ARAF	TBC1D25	S506	NetworKIN	-0.109498		ARAF	TBC1D25	S506	NetworKIN	-0.109024		ARAF	TBC1D25	S506	NetworKIN	-0.140819		ARAF	TBC1D25	S506	NetworKIN	-0.0462271
		ARAF	ARAF	S582	NetworKIN	-0.18131		ARAF	ARAF	S582	NetworKIN	-0.190912		ARAF	ARAF	S582	NetworKIN	-0.140336		ARAF	ARAF	S582	NetworKIN	0.0123466
		ARAF	PRKCD	S645	NetworKIN	-0.172449		ARAF	PRKCD	S645	NetworKIN	0.567801		ARAF	PRKCD	S645	NetworKIN	-0.174828		ARAF	PRKCD	S645	NetworKIN	0.180935
		ARAF	AGPS	S65	NetworKIN	0.220354		ARAF	AGPS	S65	NetworKIN	0.413765		ARAF	AGPS	S65	NetworKIN	-0.0100772		ARAF	AGPS	S65	NetworKIN	0.481212
		ARAF	PRKCQ	S685	NetworKIN	0.198311		ARAF	PRKCQ	S685	NetworKIN	0.106791		ARAF	PRKCQ	S685	NetworKIN	-0.197913		ARAF	PRKCQ	S685	NetworKIN	-0.21817
		ARAF	PRKCQ	S695	NetworKIN	-0.047501		ARAF	PRKCQ	S695	NetworKIN	0.0532247		ARAF	PRKCQ	S695	NetworKIN	-0.214765		ARAF	PRKCQ	S695	NetworKIN	-0.0174269
		ARAF	PRKCE	S729	NetworKIN	-0.313427		ARAF	PRKCE	S729	NetworKIN	-0.106405		ARAF	PRKCE	S729	NetworKIN	-0.472386		ARAF	PRKCE	S729	NetworKIN	-0.128153
		ARAF	DHX9	S87	NetworKIN	0.0194065		ARAF	DHX9	S87	NetworKIN	0.0123812		ARAF	DHX9	S87	NetworKIN	-0.165172		ARAF	DHX9	S87	NetworKIN	0.076273
		ARAF	RBM10	S89	NetworKIN	-0.113593		ARAF	RBM10	S89	NetworKIN	0.0079138		ARAF	RBM10	S89	NetworKIN	-0.0728676		ARAF	RBM10	S89	NetworKIN	0.067751
		ARAF	ARAF	T181	NetworKIN	-0.300876		ARAF	ARAF	T181	NetworKIN	-0.0613488		ARAF	ARAF	T181	NetworKIN	-0.20085		ARAF	ARAF	T181	NetworKIN	-0.0493073
		ARAF	ARAF	T253	NetworKIN	-0.648251		ARAF	ARAF	T253	NetworKIN	-0.849796		ARAF	ARAF	T253	NetworKIN	0.110259		ARAF	ARAF	T253	NetworKIN	0.0520007
		ARAF	HERC1	T2701	NetworKIN	-0.382754		ARAF	HERC1	T2701	NetworKIN	-0.365986		ARAF	HERC1	T2701	NetworKIN	-0.109368		ARAF	HERC1	T2701	NetworKIN	-0.133793
		ARAF	BRAF	T373	NetworKIN	-0.0831077		ARAF	BRAF	T373	NetworKIN	-0.0901934		ARAF	BRAF	T373	NetworKIN	0.0813212		ARAF	BRAF	T373	NetworKIN	-0.0626743
		ARAF	PRKCA	T497	NetworKIN	0.0604465		ARAF	PRKCA	T497	NetworKIN	0.320043		ARAF	PRKCA	T497	NetworKIN	0.0135482		ARAF	PRKCA	T497	NetworKIN	0.0267949
		ARAF	PRKCD	T507	NetworKIN	0.191672		ARAF	PRKCD	T507	NetworKIN	0.938173		ARAF	PRKCD	T507	NetworKIN	0.260866		ARAF	PRKCD	T507	NetworKIN	0.574973
		ARAF	PRKCQ	T536	NetworKIN	0.0412612		ARAF	PRKCQ	T536	NetworKIN	0.38229		ARAF	PRKCQ	T536	NetworKIN	-0.0325868		ARAF	PRKCQ	T536	NetworKIN	0.389292
		ARAF	PRKCQ	T538	NetworKIN	-0.202238		ARAF	PRKCQ	T538	NetworKIN	-0.0315419		ARAF	PRKCQ	T538	NetworKIN	-0.134877		ARAF	PRKCQ	T538	NetworKIN	-0.012507
		ARAF	UBA1	T832	NetworKIN	-0.322248		ARAF	UBA1	T832	NetworKIN	-0.128776		ARAF	UBA1	T832	NetworKIN	-0.0255686		ARAF	UBA1	T832	NetworKIN	0.019216
		ATM	DYNC1I2	S101	NetworKIN	-0.334766		ATM	DYNC1I2	S101	NetworKIN	-0.175183		ATM	DYNC1I2	S101	NetworKIN	-0.272045		ATM	DYNC1I2	S101	NetworKIN	-0.12373
		ATM	SMC3	S1067	NetworKIN	-0.202079		ATM	SMC3	S1067	NetworKIN	-0.181114		ATM	SMC3	S1067	NetworKIN	-0.288473		ATM	SMC3	S1067	NetworKIN	-0.360841
		ATM	PEX1	S1181	NetworKIN	0.254257		ATM	PEX1	S1181	NetworKIN	-0.150319		ATM	PEX1	S1181	NetworKIN	-0.244734		ATM	PEX1	S1181	NetworKIN	0.0797769
		ATM	CLASP1	S1196	NetworKIN	-0.103062		ATM	CLASP1	S1196	NetworKIN	-0.0881957		ATM	CLASP1	S1196	NetworKIN	0.0831245		ATM	CLASP1	S1196	NetworKIN	0.163858
		ATM	UBE2T	S184	NetworKIN	-0.0377982		ATM	UBE2T	S184	NetworKIN	-0.0518634		ATM	UBE2T	S184	NetworKIN	-0.198078		ATM	UBE2T	S184	NetworKIN	0.0323021
		ATM	ADRB2	S246	NetworKIN	-0.166579		ATM	ADRB2	S246	NetworKIN	0.0461301		ATM	ADRB2	S246	NetworKIN	-0.0882885		ATM	ADRB2	S246	NetworKIN	-0.451089
		ATM	SMG1	S3556	NetworKIN	-0.359065		ATM	SMG1	S3556	NetworKIN	-0.341378		ATM	SMG1	S3556	NetworKIN	-0.199474		ATM	SMG1	S3556	NetworKIN	-0.121527
		ATM	NUP107	S37	NetworKIN	-0.074238		ATM	NUP107	S37	NetworKIN	-0.0320016		ATM	NUP107	S37	NetworKIN	0.0314342		ATM	NUP107	S37	NetworKIN	-0.0741096
		ATM	LMNA	S407	NetworKIN	0.250099		ATM	LMNA	S407	NetworKIN	0.558297		ATM	LMNA	S407	NetworKIN	0.438623		ATM	LMNA	S407	NetworKIN	0.96032
		ATM	EIF4B	S425	NetworKIN	-0.120264		ATM	EIF4B	S425	NetworKIN	0.0991852		ATM	EIF4B	S425	NetworKIN	-0.0336035		ATM	EIF4B	S425	NetworKIN	0.218047
		ATM	SLC2A1	S473	NetworKIN	0.57497		ATM	SLC2A1	S473	NetworKIN	0.37921		ATM	SLC2A1	S473	NetworKIN	0.528316		ATM	SLC2A1	S473	NetworKIN	-0.341879
		ATM	SLC2A1	S490	NetworKIN	1.17703		ATM	SLC2A1	S490	NetworKIN	0.170811		ATM	SLC2A1	S490	NetworKIN	0.88941		ATM	SLC2A1	S490	NetworKIN	-0.284217
		ATM	CLASP1	S559	NetworKIN	-0.3547		ATM	CLASP1	S559	NetworKIN	-0.662916		ATM	CLASP1	S559	NetworKIN	-0.335456		ATM	CLASP1	S559	NetworKIN	-0.263625
		ATM	SUB1	S58	NetworKIN	0.165672		ATM	SUB1	S58	NetworKIN	0.0797672		ATM	SUB1	S58	NetworKIN	-0.0632785		ATM	SUB1	S58	NetworKIN	0.00321792
		ATM	SPAG9	S730	NetworKIN	0.0570397		ATM	SPAG9	S730	NetworKIN	0.270612		ATM	SPAG9	S730	NetworKIN	-0.357926		ATM	SPAG9	S730	NetworKIN	0.0865167
		ATM	PABPN1	S95	NetworKIN	0.702752		ATM	PABPN1	S95	NetworKIN	0.0286367		ATM	PABPN1	S95	NetworKIN	0.0810891		ATM	PABPN1	S95	NetworKIN	0.406529
		ATR	SMG1	S3556	NetworKIN	-0.359065		ATR	SMG1	S3556	NetworKIN	-0.341378		ATR	SMG1	S3556	NetworKIN	-0.199474		ATR	SMG1	S3556	NetworKIN	-0.121527
		ATR	NUP107	S37	NetworKIN	-0.074238		ATR	NUP107	S37	NetworKIN	-0.0320016		ATR	NUP107	S37	NetworKIN	0.0314342		ATR	NUP107	S37	NetworKIN	-0.0741096
		AURKA	CLASP1	S1091	NetworKIN	-0.316505		AURKA	CLASP1	S1091	NetworKIN	-0.215312		AURKA	CLASP1	S1091	NetworKIN	-0.277838		AURKA	CLASP1	S1091	NetworKIN	0.1171
		AURKA	CLASP1	S1196	NetworKIN	-0.103062		AURKA	CLASP1	S1196	NetworKIN	-0.0881957		AURKA	CLASP1	S1196	NetworKIN	0.0831245		AURKA	CLASP1	S1196	NetworKIN	0.163858
		AURKA	CLASP1	S1223	NetworKIN	-0.616068		AURKA	CLASP1	S1223	NetworKIN	-0.378943		AURKA	CLASP1	S1223	NetworKIN	-0.328484		AURKA	CLASP1	S1223	NetworKIN	0.126223
		AURKA	AKT1	S124	NetworKIN	-0.195004		AURKA	AKT1	S124	NetworKIN	-0.0287572		AURKA	AKT1	S124	NetworKIN	-0.199384		AURKA	AKT1	S124	NetworKIN	0.219376
		AURKA	PSMD11	S14	NetworKIN	-1.46137		AURKA	PSMD11	S14	NetworKIN	-0.494044		AURKA	PSMD11	S14	NetworKIN	-1.06536		AURKA	PSMD11	S14	NetworKIN	-1.12685
		AURKA	PRKACA	S140	NetworKIN	-0.120014		AURKA	PRKACA	S140	NetworKIN	-0.151208		AURKA	PRKACA	S140	NetworKIN	0.0260225		AURKA	PRKACA	S140	NetworKIN	-0.0919312
		AURKA	NCOR1	S1472	NetworKIN	-0.10342		AURKA	NCOR1	S1472	NetworKIN	-0.131983		AURKA	NCOR1	S1472	NetworKIN	-0.134327		AURKA	NCOR1	S1472	NetworKIN	-0.0798715
		AURKA	PSMF1	S152	NetworKIN	0.288464		AURKA	PSMF1	S152	NetworKIN	0.382715		AURKA	PSMF1	S152	NetworKIN	0.719809		AURKA	PSMF1	S152	NetworKIN	0.189053
		AURKA	PSMF1	S153	NetworKIN	0.752952		AURKA	PSMF1	S153	NetworKIN	0.831003		AURKA	PSMF1	S153	NetworKIN	0.243074		AURKA	PSMF1	S153	NetworKIN	0.639425
		AURKA	PSMD2	S16	NetworKIN	-0.10669		AURKA	PSMD2	S16	NetworKIN	-0.00486852		AURKA	PSMD2	S16	NetworKIN	-0.179518		AURKA	PSMD2	S16	NetworKIN	0.813721
		AURKA	NCOR1	S2120	NetworKIN	-0.149927		AURKA	NCOR1	S2120	NetworKIN	-0.22444		AURKA	NCOR1	S2120	NetworKIN	-0.0287035		AURKA	NCOR1	S2120	NetworKIN	-0.00735606
		AURKA	NCOR1	S2184	NetworKIN	-0.13656		AURKA	NCOR1	S2184	NetworKIN	0.0818507		AURKA	NCOR1	S2184	NetworKIN	-0.370374		AURKA	NCOR1	S2184	NetworKIN	0.0260356
		AURKA	NCOR1	S224	NetworKIN	-0.164264		AURKA	NCOR1	S224	NetworKIN	-0.118937		AURKA	NCOR1	S224	NetworKIN	-0.144772		AURKA	NCOR1	S224	NetworKIN	-0.00898119
		AURKA	PSMA3	S243	NetworKIN	-0.170023		AURKA	PSMA3	S243	NetworKIN	-0.121971		AURKA	PSMA3	S243	NetworKIN	0.035573		AURKA	PSMA3	S243	NetworKIN	-0.0975184
		AURKA	PSMA3	S250	NetworKIN	0.111206		AURKA	PSMA3	S250	NetworKIN	0.00913933		AURKA	PSMA3	S250	NetworKIN	0.0485348		AURKA	PSMA3	S250	NetworKIN	0.00319749
		AURKA	CLASP1	S280	NetworKIN	0.64336		AURKA	CLASP1	S280	NetworKIN	0.615798		AURKA	CLASP1	S280	NetworKIN	-0.00134987		AURKA	CLASP1	S280	NetworKIN	0.171292
		AURKA	PSMD1	S315	NetworKIN	0.250178		AURKA	PSMD1	S315	NetworKIN	0.400634		AURKA	PSMD1	S315	NetworKIN	0.113167		AURKA	PSMD1	S315	NetworKIN	0.349792
		AURKA	PRKACA	S339	NetworKIN	-0.146119		AURKA	PRKACA	S339	NetworKIN	-0.0226544		AURKA	PRKACA	S339	NetworKIN	-0.185649		AURKA	PRKACA	S339	NetworKIN	-0.0496337
		AURKA	PSMD2	S361	NetworKIN	0.0813294		AURKA	PSMD2	S361	NetworKIN	-0.107578		AURKA	PSMD2	S361	NetworKIN	0.0154396		AURKA	PSMD2	S361	NetworKIN	-0.0255458
		AURKA	CLASP1	S559	NetworKIN	-0.3547		AURKA	CLASP1	S559	NetworKIN	-0.662916		AURKA	CLASP1	S559	NetworKIN	-0.335456		AURKA	CLASP1	S559	NetworKIN	-0.263625
		AURKA	PSMA5	S56	NetworKIN	0.0561409		AURKA	PSMA5	S56	NetworKIN	0.802859		AURKA	PSMA5	S56	NetworKIN	-0.149377		AURKA	PSMA5	S56	NetworKIN	0.480335
		AURKA	CLASP1	S572	NetworKIN	0.595413		AURKA	CLASP1	S572	NetworKIN	0.138499		AURKA	CLASP1	S572	NetworKIN	0.578692		AURKA	CLASP1	S572	NetworKIN	1.16464
		AURKA	CLASP1	S600	NetworKIN	-0.13849		AURKA	CLASP1	S600	NetworKIN	-0.159591		AURKA	CLASP1	S600	NetworKIN	-0.23388		AURKA	CLASP1	S600	NetworKIN	-0.132912
		AURKA	CLASP1	S646	NetworKIN	-0.115469		AURKA	CLASP1	S646	NetworKIN	0.00629864		AURKA	CLASP1	S646	NetworKIN	-0.0776626		AURKA	CLASP1	S646	NetworKIN	0.0488367
		AURKA	CLASP1	S649	NetworKIN	-0.604381		AURKA	CLASP1	S649	NetworKIN	-0.400745		AURKA	CLASP1	S649	NetworKIN	-0.649882		AURKA	CLASP1	S649	NetworKIN	-0.325015
		AURKA	CTNNA1	S655	NetworKIN	0.0271721		AURKA	CTNNA1	S655	NetworKIN	0.0977256		AURKA	CTNNA1	S655	NetworKIN	-0.132872		AURKA	CTNNA1	S655	NetworKIN	0.227467
		AURKA	ANAPC1	S688	NetworKIN	-0.0977264		AURKA	ANAPC1	S688	NetworKIN	0.13834		AURKA	ANAPC1	S688	NetworKIN	-0.24548		AURKA	ANAPC1	S688	NetworKIN	0.196065
		AURKA	CLASP1	S714	NetworKIN	0.339619		AURKA	CLASP1	S714	NetworKIN	-0.0560427		AURKA	CLASP1	S714	NetworKIN	0.529855		AURKA	CLASP1	S714	NetworKIN	0.121876
		AURKA	ANAPC4	S777	NetworKIN	-0.148587		AURKA	ANAPC4	S777	NetworKIN	0.238104		AURKA	ANAPC4	S777	NetworKIN	-0.303868		AURKA	ANAPC4	S777	NetworKIN	0.0825209
		AURKA	PSMD1	T273	NetworKIN	-0.232877		AURKA	PSMD1	T273	NetworKIN	0.0593363		AURKA	PSMD1	T273	NetworKIN	-0.325992		AURKA	PSMD1	T273	NetworKIN	0.749118
		AURKA	PSMD1	T311	NetworKIN	-0.0976247		AURKA	PSMD1	T311	NetworKIN	0.141147		AURKA	PSMD1	T311	NetworKIN	-0.182621		AURKA	PSMD1	T311	NetworKIN	0.540635
		AURKA	CLASP1	T711	NetworKIN	-0.150301		AURKA	CLASP1	T711	NetworKIN	-0.368128		AURKA	CLASP1	T711	NetworKIN	-0.207179		AURKA	CLASP1	T711	NetworKIN	0.210008
		AURKB	XPO1	S1055	NetworKIN	-0.0870193		AURKB	XPO1	S1055	NetworKIN	0.205914		AURKB	XPO1	S1055	NetworKIN	0.158133		AURKB	XPO1	S1055	NetworKIN	0.203414
		AURKB	PSMD11	S14	NetworKIN	-1.46137		AURKB	PSMD11	S14	NetworKIN	-0.494044		AURKB	PSMD11	S14	NetworKIN	-1.06536		AURKB	PSMD11	S14	NetworKIN	-1.12685
		AURKB	PSMF1	S152	NetworKIN	0.288464		AURKB	PSMF1	S152	NetworKIN	0.382715		AURKB	PSMF1	S152	NetworKIN	0.719809		AURKB	PSMF1	S152	NetworKIN	0.189053
		AURKB	MAPRE1	S155	NetworKIN	0.827858		AURKB	MAPRE1	S155	NetworKIN	1.20694		AURKB	MAPRE1	S155	NetworKIN	-0.0744851		AURKB	MAPRE1	S155	NetworKIN	0.292134
		AURKB	MYLK	S1773	NetworKIN	-0.419571		AURKB	MYLK	S1773	NetworKIN	-0.539676		AURKB	MYLK	S1773	NetworKIN	-0.319162		AURKB	MYLK	S1773	NetworKIN	-0.521227
		AURKB	CLIP1	S195	NetworKIN	0.155519		AURKB	CLIP1	S195	NetworKIN	0.319524		AURKB	CLIP1	S195	NetworKIN	-0.113125		AURKB	CLIP1	S195	NetworKIN	0.328304
		AURKB	CLIP1	S200	NetworKIN	-0.607997		AURKB	CLIP1	S200	NetworKIN	-0.627363		AURKB	CLIP1	S200	NetworKIN	-0.42381		AURKB	CLIP1	S200	NetworKIN	-0.239492
		AURKB	PPP1R7	S24	NetworKIN	0.152822		AURKB	PPP1R7	S24	NetworKIN	0.11174		AURKB	PPP1R7	S24	NetworKIN	-0.116684		AURKB	PPP1R7	S24	NetworKIN	0.0428459
		AURKB	PSMA3	S243	NetworKIN	-0.170023		AURKB	PSMA3	S243	NetworKIN	-0.121971		AURKB	PSMA3	S243	NetworKIN	0.035573		AURKB	PSMA3	S243	NetworKIN	-0.0975184
		AURKB	VIM	S25	NetworKIN	0.0198795		AURKB	VIM	S25	NetworKIN	-0.0276061		AURKB	VIM	S25	NetworKIN	0.0472774		AURKB	VIM	S25	NetworKIN	-0.0674513
		AURKB	CLASP1	S280	NetworKIN	0.64336		AURKB	CLASP1	S280	NetworKIN	0.615798		AURKB	CLASP1	S280	NetworKIN	-0.00134987		AURKB	CLASP1	S280	NetworKIN	0.171292
		AURKB	VIM	S325	NetworKIN	-0.00644799		AURKB	VIM	S325	NetworKIN	0.0296908		AURKB	VIM	S325	NetworKIN	-0.402929		AURKB	VIM	S325	NetworKIN	0.0620104
		AURKB	CLIP1	S348	NetworKIN	-0.646233		AURKB	CLIP1	S348	NetworKIN	0.425052		AURKB	CLIP1	S348	NetworKIN	0.0311606		AURKB	CLIP1	S348	NetworKIN	-0.440843
		AURKB	PSMD2	S361	NetworKIN	0.0813294		AURKB	PSMD2	S361	NetworKIN	-0.107578		AURKB	PSMD2	S361	NetworKIN	0.0154396		AURKB	PSMD2	S361	NetworKIN	-0.0255458
		AURKB	VIM	S39	NetworKIN	-0.298372		AURKB	VIM	S39	NetworKIN	-0.109572		AURKB	VIM	S39	NetworKIN	-0.214707		AURKB	VIM	S39	NetworKIN	-0.234692
		AURKB	VIM	S409	NetworKIN	0.0262753		AURKB	VIM	S409	NetworKIN	-0.0602087		AURKB	VIM	S409	NetworKIN	-0.120252		AURKB	VIM	S409	NetworKIN	-0.0790235
		AURKB	TAOK1	S417	NetworKIN	0.5986		AURKB	TAOK1	S417	NetworKIN	0.253718		AURKB	TAOK1	S417	NetworKIN	-0.0328446		AURKB	TAOK1	S417	NetworKIN	0.0955681
		AURKB	VIM	S419	NetworKIN	-1.51737		AURKB	VIM	S419	NetworKIN	-0.538489		AURKB	VIM	S419	NetworKIN	-0.937661		AURKB	VIM	S419	NetworKIN	-0.997503
		AURKB	VIM	S420	NetworKIN	-0.732046		AURKB	VIM	S420	NetworKIN	0.123873		AURKB	VIM	S420	NetworKIN	-0.514863		AURKB	VIM	S420	NetworKIN	-0.338936
		AURKB	DES	S45	NetworKIN	0.437588		AURKB	DES	S45	NetworKIN	0.3466		AURKB	DES	S45	NetworKIN	-0.755477		AURKB	DES	S45	NetworKIN	-0.48234
		AURKB	VIM	S51	NetworKIN	0.200946		AURKB	VIM	S51	NetworKIN	0.182836		AURKB	VIM	S51	NetworKIN	0.0859934		AURKB	VIM	S51	NetworKIN	0.21088
		AURKB	PEBP1	S52	NetworKIN	-0.0794621		AURKB	PEBP1	S52	NetworKIN	-0.120339		AURKB	PEBP1	S52	NetworKIN	-0.199903		AURKB	PEBP1	S52	NetworKIN	-0.0981516
		AURKB	CLASP1	S559	NetworKIN	-0.3547		AURKB	CLASP1	S559	NetworKIN	-0.662916		AURKB	CLASP1	S559	NetworKIN	-0.335456		AURKB	CLASP1	S559	NetworKIN	-0.263625
		AURKB	NCL	S563	NetworKIN	-0.0271361		AURKB	NCL	S563	NetworKIN	-0.308696		AURKB	NCL	S563	NetworKIN	0.382671		AURKB	NCL	S563	NetworKIN	0.552402
		AURKB	CLASP1	S600	NetworKIN	-0.13849		AURKB	CLASP1	S600	NetworKIN	-0.159591		AURKB	CLASP1	S600	NetworKIN	-0.23388		AURKB	CLASP1	S600	NetworKIN	-0.132912
		AURKB	CLASP1	S646	NetworKIN	-0.115469		AURKB	CLASP1	S646	NetworKIN	0.00629864		AURKB	CLASP1	S646	NetworKIN	-0.0776626		AURKB	CLASP1	S646	NetworKIN	0.0488367
		AURKB	CLASP1	S649	NetworKIN	-0.604381		AURKB	CLASP1	S649	NetworKIN	-0.400745		AURKB	CLASP1	S649	NetworKIN	-0.649882		AURKB	CLASP1	S649	NetworKIN	-0.325015
		AURKB	DES	S68	NetworKIN	-0.244763		AURKB	DES	S68	NetworKIN	-0.364163		AURKB	DES	S68	NetworKIN	-0.293221		AURKB	DES	S68	NetworKIN	-0.31051
		AURKB	ANAPC1	S688	NetworKIN	-0.0977264		AURKB	ANAPC1	S688	NetworKIN	0.13834		AURKB	ANAPC1	S688	NetworKIN	-0.24548		AURKB	ANAPC1	S688	NetworKIN	0.196065
		AURKB	CLASP1	S714	NetworKIN	0.339619		AURKB	CLASP1	S714	NetworKIN	-0.0560427		AURKB	CLASP1	S714	NetworKIN	0.529855		AURKB	CLASP1	S714	NetworKIN	0.121876
		AURKB	VIM	S72	NetworKIN	-0.307155		AURKB	VIM	S72	NetworKIN	0.813534		AURKB	VIM	S72	NetworKIN	-0.0500475		AURKB	VIM	S72	NetworKIN	0.0645337
		AURKB	TAOK1	S9	NetworKIN	0.38332		AURKB	TAOK1	S9	NetworKIN	0.125034		AURKB	TAOK1	S9	NetworKIN	-0.361952		AURKB	TAOK1	S9	NetworKIN	-0.0698129
		AURKB	CLIP1	T182	NetworKIN	-0.645717		AURKB	CLIP1	T182	NetworKIN	-0.429814		AURKB	CLIP1	T182	NetworKIN	-0.541343		AURKB	CLIP1	T182	NetworKIN	-0.537954
		AURKB	PEBP1	T51	NetworKIN	-0.0818552		AURKB	PEBP1	T51	NetworKIN	-0.0150484		AURKB	PEBP1	T51	NetworKIN	-0.0938991		AURKB	PEBP1	T51	NetworKIN	0.0971786
		BCKDK	PDHX	S162	NetworKIN	-0.0179055		BCKDK	PDHX	S162	NetworKIN	-0.216969		BCKDK	PDHX	S162	NetworKIN	-0.014961		BCKDK	PDHX	S162	NetworKIN	0.00564179
		BCKDK	CKB	S178	NetworKIN	0.494887		BCKDK	CKB	S178	NetworKIN	0.0129014		BCKDK	CKB	S178	NetworKIN	-0.0495348		BCKDK	CKB	S178	NetworKIN	0.405022
		BCKDK	CKB	S285	NetworKIN	-0.351183		BCKDK	CKB	S285	NetworKIN	-0.136719		BCKDK	CKB	S285	NetworKIN	-0.645629		BCKDK	CKB	S285	NetworKIN	-0.00400393
		BCKDK	BCKDK	S31	NetworKIN	-0.0742961		BCKDK	BCKDK	S31	NetworKIN	-0.097545		BCKDK	BCKDK	S31	NetworKIN	-0.0534196		BCKDK	BCKDK	S31	NetworKIN	0.12965
		BCKDK	BCKDK	T32	NetworKIN	0.284527		BCKDK	BCKDK	T32	NetworKIN	0.0178108		BCKDK	BCKDK	T32	NetworKIN	0.10203		BCKDK	BCKDK	T32	NetworKIN	0.25223
		BCKDK	CKB	T35	NetworKIN	0.263208		BCKDK	CKB	T35	NetworKIN	-0.277573		BCKDK	CKB	T35	NetworKIN	-0.0162729		BCKDK	CKB	T35	NetworKIN	0.154436
		BLK	NGEF	Y179	NetworKIN	-0.34715		BLK	NGEF	Y179	NetworKIN	0.35893		BLK	NGEF	Y179	NetworKIN	-0.31736		BLK	NGEF	Y179	NetworKIN	0.0837749
		BLK	MAPK14	Y182	NetworKIN	0.204864		BLK	MAPK14	Y182	NetworKIN	-0.00322789		BLK	MAPK14	Y182	NetworKIN	-0.768601		BLK	MAPK14	Y182	NetworKIN	-0.71028
		CAMK1	NOS1	S1417	NetworKIN	-0.600529		CAMK1	NOS1	S1417	NetworKIN	-0.158303		CAMK1	NOS1	S1417	NetworKIN	-0.206982		CAMK1	NOS1	S1417	NetworKIN	-0.295788
		CAMK1	GAPDH	S151	NetworKIN	-0.0998896		CAMK1	GAPDH	S151	NetworKIN	0.0425593		CAMK1	GAPDH	S151	NetworKIN	-0.187635		CAMK1	GAPDH	S151	NetworKIN	0.0470781
		CAMK1	HDAC4	S246	NetworKIN	-0.353839		CAMK1	HDAC4	S246	NetworKIN	-0.572466		CAMK1	HDAC4	S246	NetworKIN	-0.715471		CAMK1	HDAC4	S246	NetworKIN	-0.248214
		CAMK1	HDAC4	S467	NetworKIN	-0.144354		CAMK1	HDAC4	S467	NetworKIN	-0.112303		CAMK1	HDAC4	S467	NetworKIN	-0.472938		CAMK1	HDAC4	S467	NetworKIN	-0.159967
		CAMK1	CAMKK2	S511	NetworKIN	-0.231121		CAMK1	CAMKK2	S511	NetworKIN	0.378747		CAMK1	CAMKK2	S511	NetworKIN	-0.234318		CAMK1	CAMKK2	S511	NetworKIN	-0.112147
		CAMK1	HDAC4	S565	NetworKIN	-0.214542		CAMK1	HDAC4	S565	NetworKIN	0.0216599		CAMK1	HDAC4	S565	NetworKIN	-0.157839		CAMK1	HDAC4	S565	NetworKIN	0.0351156
		CAMK1	PRKAR2A	S58	NetworKIN	-0.0166637		CAMK1	PRKAR2A	S58	NetworKIN	-0.0823947		CAMK1	PRKAR2A	S58	NetworKIN	-0.231985		CAMK1	PRKAR2A	S58	NetworKIN	-0.158718
		CAMK1	HDAC4	S632	NetworKIN	-0.198077		CAMK1	HDAC4	S632	NetworKIN	-0.14394		CAMK1	HDAC4	S632	NetworKIN	-0.239028		CAMK1	HDAC4	S632	NetworKIN	0.00702293
		CAMK1	PRKAR2A	S78	NetworKIN	0.0231678		CAMK1	PRKAR2A	S78	NetworKIN	0.0677798		CAMK1	PRKAR2A	S78	NetworKIN	0.00315091		CAMK1	PRKAR2A	S78	NetworKIN	0.181608
		CAMK1	PRKAR2A	S80	NetworKIN	0.310193		CAMK1	PRKAR2A	S80	NetworKIN	0.0535732		CAMK1	PRKAR2A	S80	NetworKIN	0.33025		CAMK1	PRKAR2A	S80	NetworKIN	0.503573
		CAMK1	GAPDH	S83	NetworKIN	-0.0492678		CAMK1	GAPDH	S83	NetworKIN	-0.0640536		CAMK1	GAPDH	S83	NetworKIN	0.0217917		CAMK1	GAPDH	S83	NetworKIN	-0.00214243
		CAMK1	NOS1	S852	NetworKIN	0.986083		CAMK1	NOS1	S852	NetworKIN	0.638822		CAMK1	NOS1	S852	NetworKIN	-0.277288		CAMK1	NOS1	S852	NetworKIN	-0.042151
		CAMK1	PRKAR2A	S99	NetworKIN	0.364506		CAMK1	PRKAR2A	S99	NetworKIN	0.154254		CAMK1	PRKAR2A	S99	NetworKIN	0.0751869		CAMK1	PRKAR2A	S99	NetworKIN	0.236818
		CAMK1	GAPDH	T182	NetworKIN	-0.111013		CAMK1	GAPDH	T182	NetworKIN	0.0423307		CAMK1	GAPDH	T182	NetworKIN	-0.253109		CAMK1	GAPDH	T182	NetworKIN	-0.22455
		CAMK1	GAPDH	T184	NetworKIN	0.156595		CAMK1	GAPDH	T184	NetworKIN	0.34183		CAMK1	GAPDH	T184	NetworKIN	0.134987		CAMK1	GAPDH	T184	NetworKIN	0.123852
		CAMK1	GAPDH	T211	NetworKIN	-0.29735		CAMK1	GAPDH	T211	NetworKIN	-0.0474816		CAMK1	GAPDH	T211	NetworKIN	-0.224564		CAMK1	GAPDH	T211	NetworKIN	-0.239325
		CAMK1	PRKAR2A	T54	NetworKIN	-0.0859097		CAMK1	PRKAR2A	T54	NetworKIN	-0.0331573		CAMK1	PRKAR2A	T54	NetworKIN	-0.11137		CAMK1	PRKAR2A	T54	NetworKIN	-0.0886254
		CAMK1D	CAMK2D	S330	NetworKIN	-0.179459		CAMK1D	CAMK2D	S330	NetworKIN	0.0844686		CAMK1D	CAMK2D	S330	NetworKIN	-0.318428		CAMK1D	CAMK2D	S330	NetworKIN	-0.0745757
		CAMK1D	CAMK2D	S333	NetworKIN	-0.137635		CAMK1D	CAMK2D	S333	NetworKIN	0.211022		CAMK1D	CAMK2D	S333	NetworKIN	-0.328143		CAMK1D	CAMK2D	S333	NetworKIN	0.0236544
		CAMK1D	CAMK2D	S472	NetworKIN	-0.417199		CAMK1D	CAMK2D	S472	NetworKIN	-0.303906		CAMK1D	CAMK2D	S472	NetworKIN	-0.498143		CAMK1D	CAMK2D	S472	NetworKIN	-0.0611179
		CAMK1D	CAMK2D	S490	NetworKIN	-0.153031		CAMK1D	CAMK2D	S490	NetworKIN	0.169317		CAMK1D	CAMK2D	S490	NetworKIN	-0.399717		CAMK1D	CAMK2D	S490	NetworKIN	-0.00865398
		CAMK1D	CAMK2D	T287	NetworKIN	-0.568473		CAMK1D	CAMK2D	T287	NetworKIN	-0.139768		CAMK1D	CAMK2D	T287	NetworKIN	-0.77708		CAMK1D	CAMK2D	T287	NetworKIN	-0.354361
		CAMK1D	CAMK2D	T337	NetworKIN	-0.211437		CAMK1D	CAMK2D	T337	NetworKIN	-0.00500961		CAMK1D	CAMK2D	T337	NetworKIN	-0.385476		CAMK1D	CAMK2D	T337	NetworKIN	-0.190217
		CAMK2A	EIF5	S10	NetworKIN	1.21876		CAMK2A	EIF5	S10	NetworKIN	1.12221		CAMK2A	EIF5	S10	NetworKIN	0.968224		CAMK2A	EIF5	S10	NetworKIN	1.549
		CAMK2A	RBM6	S1022	NetworKIN	-0.234863		CAMK2A	RBM6	S1022	NetworKIN	-0.11519		CAMK2A	RBM6	S1022	NetworKIN	0.0527618		CAMK2A	RBM6	S1022	NetworKIN	-0.126634
		CAMK2A	ARHGAP12	S103	NetworKIN	-0.0842827		CAMK2A	ARHGAP12	S103	NetworKIN	-0.0988155		CAMK2A	ARHGAP12	S103	NetworKIN	0.145794		CAMK2A	ARHGAP12	S103	NetworKIN	0.177967
		CAMK2A	MAST2	S1032	NetworKIN	0.560862		CAMK2A	MAST2	S1032	NetworKIN	0.568945		CAMK2A	MAST2	S1032	NetworKIN	0.115576		CAMK2A	MAST2	S1032	NetworKIN	0.371785
		CAMK2A	KIF1C	S1033	NetworKIN	0.0845322		CAMK2A	KIF1C	S1033	NetworKIN	0.22731		CAMK2A	KIF1C	S1033	NetworKIN	0.266963		CAMK2A	KIF1C	S1033	NetworKIN	0.44963
		CAMK2A	UBE4B	S105	NetworKIN	-0.373949		CAMK2A	UBE4B	S105	NetworKIN	-0.337944		CAMK2A	UBE4B	S105	NetworKIN	-0.388044		CAMK2A	UBE4B	S105	NetworKIN	-0.341317
		CAMK2A	XPO1	S1055	NetworKIN	-0.0870193		CAMK2A	XPO1	S1055	NetworKIN	0.205914		CAMK2A	XPO1	S1055	NetworKIN	0.158133		CAMK2A	XPO1	S1055	NetworKIN	0.203414
		CAMK2A	LARP1	S1056	NetworKIN	0.767688		CAMK2A	LARP1	S1056	NetworKIN	0.45729		CAMK2A	LARP1	S1056	NetworKIN	0.658658		CAMK2A	LARP1	S1056	NetworKIN	0.658125
		CAMK2A	EHBP1	S1058	NetworKIN	0.502829		CAMK2A	EHBP1	S1058	NetworKIN	0.742139		CAMK2A	EHBP1	S1058	NetworKIN	0.25114		CAMK2A	EHBP1	S1058	NetworKIN	0.67157
		CAMK2A	RAB12	S106	NetworKIN	-0.271854		CAMK2A	RAB12	S106	NetworKIN	-0.146715		CAMK2A	RAB12	S106	NetworKIN	0.0534517		CAMK2A	RAB12	S106	NetworKIN	-0.106156
		CAMK2A	MYO18A	S1067	NetworKIN	0.0292723		CAMK2A	MYO18A	S1067	NetworKIN	0.147455		CAMK2A	MYO18A	S1067	NetworKIN	-0.0440342		CAMK2A	MYO18A	S1067	NetworKIN	0.0189444
		CAMK2A	RTN4	S107	NetworKIN	-0.388726		CAMK2A	RTN4	S107	NetworKIN	0.44615		CAMK2A	RTN4	S107	NetworKIN	-0.380446		CAMK2A	RTN4	S107	NetworKIN	-0.315672
		CAMK2A	MPP1	S110	NetworKIN	-0.169926		CAMK2A	MPP1	S110	NetworKIN	-0.0393522		CAMK2A	MPP1	S110	NetworKIN	-0.165138		CAMK2A	MPP1	S110	NetworKIN	-0.300433
		CAMK2A	GPATCH8	S1107	NetworKIN	0.0235772		CAMK2A	GPATCH8	S1107	NetworKIN	0.370275		CAMK2A	GPATCH8	S1107	NetworKIN	-0.130314		CAMK2A	GPATCH8	S1107	NetworKIN	0.174448
		CAMK2A	SGPP1	S112	NetworKIN	-0.121516		CAMK2A	SGPP1	S112	NetworKIN	-0.0656597		CAMK2A	SGPP1	S112	NetworKIN	-0.127537		CAMK2A	SGPP1	S112	NetworKIN	-0.075769
		CAMK2A	TSC2	S1132	NetworKIN	-0.112434		CAMK2A	TSC2	S1132	NetworKIN	1.22552		CAMK2A	TSC2	S1132	NetworKIN	0.307695		CAMK2A	TSC2	S1132	NetworKIN	-0.192945
		CAMK2A	SOS1	S1134	NetworKIN	0.557437		CAMK2A	SOS1	S1134	NetworKIN	0.612348		CAMK2A	SOS1	S1134	NetworKIN	0.164845		CAMK2A	SOS1	S1134	NetworKIN	0.47144
		CAMK2A	PRKAR2B	S114	NetworKIN	0.086834		CAMK2A	PRKAR2B	S114	NetworKIN	0.601125		CAMK2A	PRKAR2B	S114	NetworKIN	0.574247		CAMK2A	PRKAR2B	S114	NetworKIN	0.240406
		CAMK2A	PCGF6	S115	NetworKIN	0.00728339		CAMK2A	PCGF6	S115	NetworKIN	-0.0335889		CAMK2A	PCGF6	S115	NetworKIN	-0.0921096		CAMK2A	PCGF6	S115	NetworKIN	-0.0531429
		CAMK2A	BCL9L	S118	NetworKIN	-0.278723		CAMK2A	BCL9L	S118	NetworKIN	-0.188001		CAMK2A	BCL9L	S118	NetworKIN	-0.303497		CAMK2A	BCL9L	S118	NetworKIN	-0.137089
		CAMK2A	ARID1A	S1184	NetworKIN	-0.180608		CAMK2A	ARID1A	S1184	NetworKIN	-0.0640776		CAMK2A	ARID1A	S1184	NetworKIN	-0.445243		CAMK2A	ARID1A	S1184	NetworKIN	-0.443577
		CAMK2A	EIF3A	S1188	NetworKIN	-0.411633		CAMK2A	EIF3A	S1188	NetworKIN	-0.335813		CAMK2A	EIF3A	S1188	NetworKIN	-0.1901		CAMK2A	EIF3A	S1188	NetworKIN	-0.255588
		CAMK2A	PPP1R7	S12	NetworKIN	-0.340746		CAMK2A	PPP1R7	S12	NetworKIN	-0.155135		CAMK2A	PPP1R7	S12	NetworKIN	-0.596477		CAMK2A	PPP1R7	S12	NetworKIN	-0.485201
		CAMK2A	RPL34	S12	NetworKIN	-0.0574719		CAMK2A	RPL34	S12	NetworKIN	-0.0191426		CAMK2A	RPL34	S12	NetworKIN	-0.423813		CAMK2A	RPL34	S12	NetworKIN	-0.449176
		CAMK2A	PDLIM4	S120	NetworKIN	-0.189689		CAMK2A	PDLIM4	S120	NetworKIN	-0.0603156		CAMK2A	PDLIM4	S120	NetworKIN	-0.121832		CAMK2A	PDLIM4	S120	NetworKIN	-0.0297197
		CAMK2A	ZRANB2	S120	NetworKIN	-0.0318639		CAMK2A	ZRANB2	S120	NetworKIN	0.001854		CAMK2A	ZRANB2	S120	NetworKIN	0.00349832		CAMK2A	ZRANB2	S120	NetworKIN	0.170922
		CAMK2A	MEF2D	S121	NetworKIN	-0.164451		CAMK2A	MEF2D	S121	NetworKIN	0.0441518		CAMK2A	MEF2D	S121	NetworKIN	-0.345709		CAMK2A	MEF2D	S121	NetworKIN	-0.240924
		CAMK2A	UTP18	S121	NetworKIN	-0.156421		CAMK2A	UTP18	S121	NetworKIN	0.012063		CAMK2A	UTP18	S121	NetworKIN	-0.00791539		CAMK2A	UTP18	S121	NetworKIN	-0.326283
		CAMK2A	PEX1	S1211	NetworKIN	-0.130797		CAMK2A	PEX1	S1211	NetworKIN	0.28935		CAMK2A	PEX1	S1211	NetworKIN	-0.389718		CAMK2A	PEX1	S1211	NetworKIN	0.100168
		CAMK2A	MAST3	S1223	NetworKIN	0.0638662		CAMK2A	MAST3	S1223	NetworKIN	0.488148		CAMK2A	MAST3	S1223	NetworKIN	0.0803904		CAMK2A	MAST3	S1223	NetworKIN	0.211662
		CAMK2A	RPL18A	S123	NetworKIN	-0.0107643		CAMK2A	RPL18A	S123	NetworKIN	-0.0288107		CAMK2A	RPL18A	S123	NetworKIN	-0.210159		CAMK2A	RPL18A	S123	NetworKIN	-0.1128
		CAMK2A	EHBP1L1	S1257	NetworKIN	-0.0406347		CAMK2A	EHBP1L1	S1257	NetworKIN	-0.0244315		CAMK2A	EHBP1L1	S1257	NetworKIN	-0.11947		CAMK2A	EHBP1L1	S1257	NetworKIN	0.0608559
		CAMK2A	NCOA5	S126	NetworKIN	-0.25498		CAMK2A	NCOA5	S126	NetworKIN	-0.151182		CAMK2A	NCOA5	S126	NetworKIN	0.0333078		CAMK2A	NCOA5	S126	NetworKIN	-0.152299
		CAMK2A	PITPNM2	S1277	NetworKIN	-0.00653742		CAMK2A	PITPNM2	S1277	NetworKIN	0.045385		CAMK2A	PITPNM2	S1277	NetworKIN	-0.11146		CAMK2A	PITPNM2	S1277	NetworKIN	0.155613
		CAMK2A	NCBP2	S13	NetworKIN	-0.500797		CAMK2A	NCBP2	S13	NetworKIN	-0.295023		CAMK2A	NCBP2	S13	NetworKIN	-0.293872		CAMK2A	NCBP2	S13	NetworKIN	-0.272321
		CAMK2A	RICTOR	S1302	NetworKIN	0.119216		CAMK2A	RICTOR	S1302	NetworKIN	0.101687		CAMK2A	RICTOR	S1302	NetworKIN	0.109608		CAMK2A	RICTOR	S1302	NetworKIN	0.193756
		CAMK2A	INTS1	S1318	NetworKIN	0.962967		CAMK2A	INTS1	S1318	NetworKIN	1.65875		CAMK2A	INTS1	S1318	NetworKIN	1.24415		CAMK2A	INTS1	S1318	NetworKIN	1.829
		CAMK2A	BAD	S134	NetworKIN	1.14603		CAMK2A	BAD	S134	NetworKIN	0.447423		CAMK2A	BAD	S134	NetworKIN	0.780367		CAMK2A	BAD	S134	NetworKIN	0.138749
		CAMK2A	LEMD2	S134	NetworKIN	0.053261		CAMK2A	LEMD2	S134	NetworKIN	-0.0814912		CAMK2A	LEMD2	S134	NetworKIN	-0.103622		CAMK2A	LEMD2	S134	NetworKIN	0.255152
		CAMK2A	AHNAK	S135	NetworKIN	1.96517		CAMK2A	AHNAK	S135	NetworKIN	1.91874		CAMK2A	AHNAK	S135	NetworKIN	0.949456		CAMK2A	AHNAK	S135	NetworKIN	0.677794
		CAMK2A	TSC2	S1364	NetworKIN	0.195625		CAMK2A	TSC2	S1364	NetworKIN	0.563529		CAMK2A	TSC2	S1364	NetworKIN	0.0544231		CAMK2A	TSC2	S1364	NetworKIN	0.358872
		CAMK2A	HUWE1	S1368	NetworKIN	-0.10942		CAMK2A	HUWE1	S1368	NetworKIN	0.264292		CAMK2A	HUWE1	S1368	NetworKIN	-0.204689		CAMK2A	HUWE1	S1368	NetworKIN	-0.279858
		CAMK2A	KIF13B	S1381	NetworKIN	-0.067027		CAMK2A	KIF13B	S1381	NetworKIN	-0.322427		CAMK2A	KIF13B	S1381	NetworKIN	-0.0913633		CAMK2A	KIF13B	S1381	NetworKIN	-0.107235
		CAMK2A	RICTOR	S1388	NetworKIN	-0.560385		CAMK2A	RICTOR	S1388	NetworKIN	-0.44088		CAMK2A	RICTOR	S1388	NetworKIN	-0.319554		CAMK2A	RICTOR	S1388	NetworKIN	-0.249398
		CAMK2A	LEMD2	S139	NetworKIN	-0.384872		CAMK2A	LEMD2	S139	NetworKIN	-0.411247		CAMK2A	LEMD2	S139	NetworKIN	-0.301775		CAMK2A	LEMD2	S139	NetworKIN	-0.39359
		CAMK2A	STX12	S139	NetworKIN	-0.036029		CAMK2A	STX12	S139	NetworKIN	-0.0883808		CAMK2A	STX12	S139	NetworKIN	0.1086		CAMK2A	STX12	S139	NetworKIN	0.121009
		CAMK2A	PSMD11	S14	NetworKIN	-1.46137		CAMK2A	PSMD11	S14	NetworKIN	-0.494044		CAMK2A	PSMD11	S14	NetworKIN	-1.06536		CAMK2A	PSMD11	S14	NetworKIN	-1.12685
		CAMK2A	NOS1	S1417	NetworKIN	-0.600529		CAMK2A	NOS1	S1417	NetworKIN	-0.158303		CAMK2A	NOS1	S1417	NetworKIN	-0.206982		CAMK2A	NOS1	S1417	NetworKIN	-0.295788
		CAMK2A	ARHGEF17	S142	NetworKIN	-0.0660579		CAMK2A	ARHGEF17	S142	NetworKIN	0.0838993		CAMK2A	ARHGEF17	S142	NetworKIN	-0.0228819		CAMK2A	ARHGEF17	S142	NetworKIN	-0.051539
		CAMK2A	HERC1	S1428	NetworKIN	-0.127209		CAMK2A	HERC1	S1428	NetworKIN	0.0229128		CAMK2A	HERC1	S1428	NetworKIN	-0.133922		CAMK2A	HERC1	S1428	NetworKIN	0.0949662
		CAMK2A	C2orf49	S143	NetworKIN	0.00208759		CAMK2A	C2orf49	S143	NetworKIN	0.614378		CAMK2A	C2orf49	S143	NetworKIN	-0.166752		CAMK2A	C2orf49	S143	NetworKIN	0.118469
		CAMK2A	C18orf25	S145	NetworKIN	0.234606		CAMK2A	C18orf25	S145	NetworKIN	0.469759		CAMK2A	C18orf25	S145	NetworKIN	-0.262074		CAMK2A	C18orf25	S145	NetworKIN	-0.037684
		CAMK2A	DIDO1	S1456	NetworKIN	0.0544467		CAMK2A	DIDO1	S1456	NetworKIN	0.44604		CAMK2A	DIDO1	S1456	NetworKIN	-0.0931803		CAMK2A	DIDO1	S1456	NetworKIN	0.197651
		CAMK2A	LASP1	S146	NetworKIN	-0.172926		CAMK2A	LASP1	S146	NetworKIN	0.18087		CAMK2A	LASP1	S146	NetworKIN	-0.00256778		CAMK2A	LASP1	S146	NetworKIN	0.182756
		CAMK2A	TNKS1BP1	S1473	NetworKIN	-0.19243		CAMK2A	TNKS1BP1	S1473	NetworKIN	-0.106951		CAMK2A	TNKS1BP1	S1473	NetworKIN	-0.0690274		CAMK2A	TNKS1BP1	S1473	NetworKIN	-0.276151
		CAMK2A	PLIN5	S148	NetworKIN	0.138422		CAMK2A	PLIN5	S148	NetworKIN	0.207664		CAMK2A	PLIN5	S148	NetworKIN	-0.0520934		CAMK2A	PLIN5	S148	NetworKIN	-0.0277043
		CAMK2A	MYH4	S1482	NetworKIN	0.614333		CAMK2A	MYH4	S1482	NetworKIN	0.180214		CAMK2A	MYH4	S1482	NetworKIN	0.191438		CAMK2A	MYH4	S1482	NetworKIN	0.108072
		CAMK2A	C9orf78	S15	NetworKIN	0.147042		CAMK2A	C9orf78	S15	NetworKIN	-0.105379		CAMK2A	C9orf78	S15	NetworKIN	-0.293935		CAMK2A	C9orf78	S15	NetworKIN	0.10217
		CAMK2A	HSPB1	S15	NetworKIN	0.907348		CAMK2A	HSPB1	S15	NetworKIN	1.06209		CAMK2A	HSPB1	S15	NetworKIN	-0.24272		CAMK2A	HSPB1	S15	NetworKIN	1.33422
		CAMK2A	SIPA1L3	S1544	NetworKIN	-0.26405		CAMK2A	SIPA1L3	S1544	NetworKIN	-0.105384		CAMK2A	SIPA1L3	S1544	NetworKIN	-0.151125		CAMK2A	SIPA1L3	S1544	NetworKIN	-0.117014
		CAMK2A	MFF	S155	NetworKIN	0.0568249		CAMK2A	MFF	S155	NetworKIN	0.355014		CAMK2A	MFF	S155	NetworKIN	-0.0359093		CAMK2A	MFF	S155	NetworKIN	-0.134728
		CAMK2A	MFF	S157	NetworKIN	-0.426438		CAMK2A	MFF	S157	NetworKIN	-0.185453		CAMK2A	MFF	S157	NetworKIN	0.192538		CAMK2A	MFF	S157	NetworKIN	-0.131604
		CAMK2A	ACTN4	S159	NetworKIN	0.0269188		CAMK2A	ACTN4	S159	NetworKIN	0.0182804		CAMK2A	ACTN4	S159	NetworKIN	-0.0361802		CAMK2A	ACTN4	S159	NetworKIN	-0.0945034
		CAMK2A	HOMER3	S159	NetworKIN	-0.778844		CAMK2A	HOMER3	S159	NetworKIN	0.112989		CAMK2A	HOMER3	S159	NetworKIN	-0.659895		CAMK2A	HOMER3	S159	NetworKIN	-0.589032
		CAMK2A	IQGAP2	S16	NetworKIN	-0.171013		CAMK2A	IQGAP2	S16	NetworKIN	-0.0766263		CAMK2A	IQGAP2	S16	NetworKIN	-0.0653324		CAMK2A	IQGAP2	S16	NetworKIN	-0.213029
		CAMK2A	RAB3IP	S165	NetworKIN	-0.0949463		CAMK2A	RAB3IP	S165	NetworKIN	-0.0208396		CAMK2A	RAB3IP	S165	NetworKIN	-0.0830552		CAMK2A	RAB3IP	S165	NetworKIN	0.124056
		CAMK2A	PRKRA	S167	NetworKIN	-0.0348004		CAMK2A	PRKRA	S167	NetworKIN	0.336439		CAMK2A	PRKRA	S167	NetworKIN	-0.174878		CAMK2A	PRKRA	S167	NetworKIN	-0.00179479
		CAMK2A	AMPD2	S168	NetworKIN	0.152119		CAMK2A	AMPD2	S168	NetworKIN	0.253799		CAMK2A	AMPD2	S168	NetworKIN	0.163298		CAMK2A	AMPD2	S168	NetworKIN	0.196218
		CAMK2A	PANK2	S168	NetworKIN	-0.22868		CAMK2A	PANK2	S168	NetworKIN	-0.284155		CAMK2A	PANK2	S168	NetworKIN	-0.188177		CAMK2A	PANK2	S168	NetworKIN	-0.22008
		CAMK2A	TAF7	S171	NetworKIN	-0.314248		CAMK2A	TAF7	S171	NetworKIN	-0.10509		CAMK2A	TAF7	S171	NetworKIN	-0.442899		CAMK2A	TAF7	S171	NetworKIN	-0.150693
		CAMK2A	OSBPL11	S174	NetworKIN	-0.113842		CAMK2A	OSBPL11	S174	NetworKIN	-0.220339		CAMK2A	OSBPL11	S174	NetworKIN	-0.0468906		CAMK2A	OSBPL11	S174	NetworKIN	-0.0021407
		CAMK2A	PDAP1	S176	NetworKIN	-1.45094		CAMK2A	PDAP1	S176	NetworKIN	-0.49331		CAMK2A	PDAP1	S176	NetworKIN	-1.15544		CAMK2A	PDAP1	S176	NetworKIN	-1.05577
		CAMK2A	MYLK	S1773	NetworKIN	-0.419571		CAMK2A	MYLK	S1773	NetworKIN	-0.539676		CAMK2A	MYLK	S1773	NetworKIN	-0.319162		CAMK2A	MYLK	S1773	NetworKIN	-0.521227
		CAMK2A	PRKRA	S18	NetworKIN	-0.0169171		CAMK2A	PRKRA	S18	NetworKIN	0.136942		CAMK2A	PRKRA	S18	NetworKIN	-0.549922		CAMK2A	PRKRA	S18	NetworKIN	-0.193262
		CAMK2A	NT5C	S182	NetworKIN	-0.379419		CAMK2A	NT5C	S182	NetworKIN	-0.0696767		CAMK2A	NT5C	S182	NetworKIN	-0.176403		CAMK2A	NT5C	S182	NetworKIN	-0.130081
		CAMK2A	ITPR3	S1832	NetworKIN	-0.188953		CAMK2A	ITPR3	S1832	NetworKIN	-0.099845		CAMK2A	ITPR3	S1832	NetworKIN	-0.240674		CAMK2A	ITPR3	S1832	NetworKIN	-0.072339
		CAMK2A	CACNB1	S186	NetworKIN	-0.18426		CAMK2A	CACNB1	S186	NetworKIN	-0.0495861		CAMK2A	CACNB1	S186	NetworKIN	-0.00172613		CAMK2A	CACNB1	S186	NetworKIN	-0.0520123
		CAMK2A	KCTD12	S187	NetworKIN	-0.00597304		CAMK2A	KCTD12	S187	NetworKIN	0.182844		CAMK2A	KCTD12	S187	NetworKIN	-0.152565		CAMK2A	KCTD12	S187	NetworKIN	0.250543
		CAMK2A	SDC2	S187	NetworKIN	-0.643009		CAMK2A	SDC2	S187	NetworKIN	-0.294714		CAMK2A	SDC2	S187	NetworKIN	-0.594101		CAMK2A	SDC2	S187	NetworKIN	-0.342763
		CAMK2A	MATR3	S188	NetworKIN	0.137522		CAMK2A	MATR3	S188	NetworKIN	0.166765		CAMK2A	MATR3	S188	NetworKIN	-0.106085		CAMK2A	MATR3	S188	NetworKIN	0.0791345
		CAMK2A	SEC61B	S19	NetworKIN	-0.383591		CAMK2A	SEC61B	S19	NetworKIN	-0.0841158		CAMK2A	SEC61B	S19	NetworKIN	-0.0249232		CAMK2A	SEC61B	S19	NetworKIN	-0.172571
		CAMK2A	ZNRF2	S19	NetworKIN	-0.146415		CAMK2A	ZNRF2	S19	NetworKIN	0.156969		CAMK2A	ZNRF2	S19	NetworKIN	-0.0112313		CAMK2A	ZNRF2	S19	NetworKIN	0.0563937
		CAMK2A	LIMCH1	S190	NetworKIN	-0.660654		CAMK2A	LIMCH1	S190	NetworKIN	-0.375942		CAMK2A	LIMCH1	S190	NetworKIN	-0.255612		CAMK2A	LIMCH1	S190	NetworKIN	-0.50953
		CAMK2A	PDE4D	S190	NetworKIN	-0.249973		CAMK2A	PDE4D	S190	NetworKIN	0.130043		CAMK2A	PDE4D	S190	NetworKIN	-0.143772		CAMK2A	PDE4D	S190	NetworKIN	-0.0990976
		CAMK2A	CDC42EP1	S192	NetworKIN	-0.181416		CAMK2A	CDC42EP1	S192	NetworKIN	-0.250484		CAMK2A	CDC42EP1	S192	NetworKIN	-0.227713		CAMK2A	CDC42EP1	S192	NetworKIN	-0.165799
		CAMK2A	DENND5A	S193	NetworKIN	-0.314062		CAMK2A	DENND5A	S193	NetworKIN	-0.200977		CAMK2A	DENND5A	S193	NetworKIN	-0.410144		CAMK2A	DENND5A	S193	NetworKIN	-0.313631
		CAMK2A	TACC2	S1946	NetworKIN	-0.102523		CAMK2A	TACC2	S1946	NetworKIN	-0.00729626		CAMK2A	TACC2	S1946	NetworKIN	-0.191788		CAMK2A	TACC2	S1946	NetworKIN	-0.0681899
		CAMK2A	DTD1	S196	NetworKIN	-0.209271		CAMK2A	DTD1	S196	NetworKIN	0.384788		CAMK2A	DTD1	S196	NetworKIN	-0.542857		CAMK2A	DTD1	S196	NetworKIN	-0.254238
		CAMK2A	HIRIP3	S196	NetworKIN	-0.21859		CAMK2A	HIRIP3	S196	NetworKIN	-0.202753		CAMK2A	HIRIP3	S196	NetworKIN	-0.153266		CAMK2A	HIRIP3	S196	NetworKIN	-0.25762
		CAMK2A	MLXIPL	S196	NetworKIN	0.214485		CAMK2A	MLXIPL	S196	NetworKIN	-0.0814893		CAMK2A	MLXIPL	S196	NetworKIN	-0.0769089		CAMK2A	MLXIPL	S196	NetworKIN	-0.0817922
		CAMK2A	SRRM2	S1984	NetworKIN	0.143913		CAMK2A	SRRM2	S1984	NetworKIN	0.305719		CAMK2A	SRRM2	S1984	NetworKIN	0.533333		CAMK2A	SRRM2	S1984	NetworKIN	0.467187
		CAMK2A	PPP1R2	S20	NetworKIN	-0.804556		CAMK2A	PPP1R2	S20	NetworKIN	-0.364553		CAMK2A	PPP1R2	S20	NetworKIN	-0.314021		CAMK2A	PPP1R2	S20	NetworKIN	-0.802423
		CAMK2A	LIMCH1	S201	NetworKIN	-0.270848		CAMK2A	LIMCH1	S201	NetworKIN	-0.0648155		CAMK2A	LIMCH1	S201	NetworKIN	-0.499463		CAMK2A	LIMCH1	S201	NetworKIN	-0.0810041
		CAMK2A	SPAG9	S203	NetworKIN	0.375348		CAMK2A	SPAG9	S203	NetworKIN	0.483633		CAMK2A	SPAG9	S203	NetworKIN	-0.278358		CAMK2A	SPAG9	S203	NetworKIN	0.171522
		CAMK2A	PRKD1	S205	NetworKIN	-0.0252342		CAMK2A	PRKD1	S205	NetworKIN	-0.206498		CAMK2A	PRKD1	S205	NetworKIN	-0.0109588		CAMK2A	PRKD1	S205	NetworKIN	0.0368838
		CAMK2A	AEBP2	S206	NetworKIN	-0.100897		CAMK2A	AEBP2	S206	NetworKIN	-0.0935896		CAMK2A	AEBP2	S206	NetworKIN	-0.173674		CAMK2A	AEBP2	S206	NetworKIN	-0.114574
		CAMK2A	TACC2	S2072	NetworKIN	-0.136297		CAMK2A	TACC2	S2072	NetworKIN	0.132868		CAMK2A	TACC2	S2072	NetworKIN	-0.191106		CAMK2A	TACC2	S2072	NetworKIN	-0.196737
		CAMK2A	PRPF38A	S209	NetworKIN	0.772877		CAMK2A	PRPF38A	S209	NetworKIN	0.514473		CAMK2A	PRPF38A	S209	NetworKIN	0.849512		CAMK2A	PRPF38A	S209	NetworKIN	0.598774
		CAMK2A	GSK3A	S21	NetworKIN	-0.0101347		CAMK2A	GSK3A	S21	NetworKIN	-0.033481		CAMK2A	GSK3A	S21	NetworKIN	-0.199225		CAMK2A	GSK3A	S21	NetworKIN	0.0790358
		CAMK2A	RICTOR	S21	NetworKIN	-0.176442		CAMK2A	RICTOR	S21	NetworKIN	-0.223434		CAMK2A	RICTOR	S21	NetworKIN	-0.0227678		CAMK2A	RICTOR	S21	NetworKIN	-0.0848639
		CAMK2A	AHNAK	S210	NetworKIN	0.54543		CAMK2A	AHNAK	S210	NetworKIN	0.558732		CAMK2A	AHNAK	S210	NetworKIN	0.0716834		CAMK2A	AHNAK	S210	NetworKIN	0.242887
		CAMK2A	FLNB	S2107	NetworKIN	0.352805		CAMK2A	FLNB	S2107	NetworKIN	0.704666		CAMK2A	FLNB	S2107	NetworKIN	-0.590608		CAMK2A	FLNB	S2107	NetworKIN	-0.026814
		CAMK2A	STBD1	S211	NetworKIN	-0.917843		CAMK2A	STBD1	S211	NetworKIN	0.0422559		CAMK2A	STBD1	S211	NetworKIN	-0.527163		CAMK2A	STBD1	S211	NetworKIN	-0.870225
		CAMK2A	TJP1	S212	NetworKIN	-0.477105		CAMK2A	TJP1	S212	NetworKIN	-0.175341		CAMK2A	TJP1	S212	NetworKIN	-0.145152		CAMK2A	TJP1	S212	NetworKIN	-0.204563
		CAMK2A	FLNA	S2152	NetworKIN	0.485165		CAMK2A	FLNA	S2152	NetworKIN	0.479362		CAMK2A	FLNA	S2152	NetworKIN	0.0076573		CAMK2A	FLNA	S2152	NetworKIN	0.058782
		CAMK2A	JPH1	S216	NetworKIN	-0.138827		CAMK2A	JPH1	S216	NetworKIN	0.0100112		CAMK2A	JPH1	S216	NetworKIN	-0.258686		CAMK2A	JPH1	S216	NetworKIN	-0.0810972
		CAMK2A	FNIP1	S220	NetworKIN	-0.0250691		CAMK2A	FNIP1	S220	NetworKIN	-0.0788381		CAMK2A	FNIP1	S220	NetworKIN	-0.0560222		CAMK2A	FNIP1	S220	NetworKIN	-0.0401633
		CAMK2A	TNKS1BP1	S221	NetworKIN	-0.314111		CAMK2A	TNKS1BP1	S221	NetworKIN	-0.151398		CAMK2A	TNKS1BP1	S221	NetworKIN	-0.134006		CAMK2A	TNKS1BP1	S221	NetworKIN	-0.0314627
		CAMK2A	GLCCI1	S223	NetworKIN	-0.274754		CAMK2A	GLCCI1	S223	NetworKIN	0.183029		CAMK2A	GLCCI1	S223	NetworKIN	-0.165582		CAMK2A	GLCCI1	S223	NetworKIN	-0.0272174
		CAMK2A	QDPR	S223	NetworKIN	-0.0869818		CAMK2A	QDPR	S223	NetworKIN	-0.0242604		CAMK2A	QDPR	S223	NetworKIN	0.0290736		CAMK2A	QDPR	S223	NetworKIN	0.0404027
		CAMK2A	FLNC	S2233	NetworKIN	-0.23126		CAMK2A	FLNC	S2233	NetworKIN	-0.160086		CAMK2A	FLNC	S2233	NetworKIN	-0.270175		CAMK2A	FLNC	S2233	NetworKIN	-0.210696
		CAMK2A	SPTBN4	S2254	NetworKIN	-0.267649		CAMK2A	SPTBN4	S2254	NetworKIN	-0.207278		CAMK2A	SPTBN4	S2254	NetworKIN	-0.540162		CAMK2A	SPTBN4	S2254	NetworKIN	-0.547092
		CAMK2A	BLVRA	S230	NetworKIN	0.216121		CAMK2A	BLVRA	S230	NetworKIN	0.697178		CAMK2A	BLVRA	S230	NetworKIN	0.250727		CAMK2A	BLVRA	S230	NetworKIN	0.322909
		CAMK2A	FAM53C	S232	NetworKIN	-0.255141		CAMK2A	FAM53C	S232	NetworKIN	-0.216604		CAMK2A	FAM53C	S232	NetworKIN	-0.32401		CAMK2A	FAM53C	S232	NetworKIN	-0.139072
		CAMK2A	RTKN	S232	NetworKIN	0.173268		CAMK2A	RTKN	S232	NetworKIN	0.00568039		CAMK2A	RTKN	S232	NetworKIN	0.210618		CAMK2A	RTKN	S232	NetworKIN	0.0923307
		CAMK2A	MYOT	S233	NetworKIN	-0.343671		CAMK2A	MYOT	S233	NetworKIN	0.072518		CAMK2A	MYOT	S233	NetworKIN	-0.0736389		CAMK2A	MYOT	S233	NetworKIN	-0.157978
		CAMK2A	TRA2A	S236	NetworKIN	-0.0153457		CAMK2A	TRA2A	S236	NetworKIN	0.159642		CAMK2A	TRA2A	S236	NetworKIN	-0.313804		CAMK2A	TRA2A	S236	NetworKIN	-0.0344112
		CAMK2A	TALDO1	S237	NetworKIN	-0.120678		CAMK2A	TALDO1	S237	NetworKIN	-0.138163		CAMK2A	TALDO1	S237	NetworKIN	0.071484		CAMK2A	TALDO1	S237	NetworKIN	-0.105925
		CAMK2A	SVIL	S238	NetworKIN	-0.0863936		CAMK2A	SVIL	S238	NetworKIN	-0.298839		CAMK2A	SVIL	S238	NetworKIN	-0.396966		CAMK2A	SVIL	S238	NetworKIN	-0.530505
		CAMK2A	VASP	S239	NetworKIN	-0.218445		CAMK2A	VASP	S239	NetworKIN	-0.0670128		CAMK2A	VASP	S239	NetworKIN	-0.195437		CAMK2A	VASP	S239	NetworKIN	-0.214463
		CAMK2A	CFL2	S24	NetworKIN	1.02515		CAMK2A	CFL2	S24	NetworKIN	2.53137		CAMK2A	CFL2	S24	NetworKIN	0.930068		CAMK2A	CFL2	S24	NetworKIN	1.3752
		CAMK2A	PPP1R7	S24	NetworKIN	0.152822		CAMK2A	PPP1R7	S24	NetworKIN	0.11174		CAMK2A	PPP1R7	S24	NetworKIN	-0.116684		CAMK2A	PPP1R7	S24	NetworKIN	0.0428459
		CAMK2A	OSBP	S240	NetworKIN	-0.26136		CAMK2A	OSBP	S240	NetworKIN	0.170256		CAMK2A	OSBP	S240	NetworKIN	-0.50585		CAMK2A	OSBP	S240	NetworKIN	-0.0614798
		CAMK2A	RFFL	S240	NetworKIN	0.656832		CAMK2A	RFFL	S240	NetworKIN	0.949929		CAMK2A	RFFL	S240	NetworKIN	0.117474		CAMK2A	RFFL	S240	NetworKIN	0.243205
		CAMK2A	MDH1	S241	NetworKIN	0.30297		CAMK2A	MDH1	S241	NetworKIN	-0.234136		CAMK2A	MDH1	S241	NetworKIN	-0.200647		CAMK2A	MDH1	S241	NetworKIN	-0.019132
		CAMK2A	PDPK1	S241	NetworKIN	-0.255166		CAMK2A	PDPK1	S241	NetworKIN	-0.327624		CAMK2A	PDPK1	S241	NetworKIN	-0.20333		CAMK2A	PDPK1	S241	NetworKIN	-0.126543
		CAMK2A	FLNB	S2478	NetworKIN	0.355223		CAMK2A	FLNB	S2478	NetworKIN	0.861404		CAMK2A	FLNB	S2478	NetworKIN	-0.334477		CAMK2A	FLNB	S2478	NetworKIN	0.532659
		CAMK2A	PPP1R3D	S25	NetworKIN	-0.162785		CAMK2A	PPP1R3D	S25	NetworKIN	0.0887308		CAMK2A	PPP1R3D	S25	NetworKIN	-0.162674		CAMK2A	PPP1R3D	S25	NetworKIN	0.133935
		CAMK2A	PXN	S250	NetworKIN	1.54851		CAMK2A	PXN	S250	NetworKIN	1.10272		CAMK2A	PXN	S250	NetworKIN	1.45694		CAMK2A	PXN	S250	NetworKIN	1.87652
		CAMK2A	SACS	S2511	NetworKIN	-0.3052		CAMK2A	SACS	S2511	NetworKIN	0.224536		CAMK2A	SACS	S2511	NetworKIN	-0.0367315		CAMK2A	SACS	S2511	NetworKIN	0.023267
		CAMK2A	CTNND1	S252	NetworKIN	0.770788		CAMK2A	CTNND1	S252	NetworKIN	0.0466873		CAMK2A	CTNND1	S252	NetworKIN	0.505106		CAMK2A	CTNND1	S252	NetworKIN	0.526746
		CAMK2A	LSP1	S252	NetworKIN	0.0566919		CAMK2A	LSP1	S252	NetworKIN	0.274011		CAMK2A	LSP1	S252	NetworKIN	-0.00393132		CAMK2A	LSP1	S252	NetworKIN	-0.017499
		CAMK2A	NF1	S2523	NetworKIN	-0.209889		CAMK2A	NF1	S2523	NetworKIN	0.24123		CAMK2A	NF1	S2523	NetworKIN	-0.355794		CAMK2A	NF1	S2523	NetworKIN	-0.0833263
		CAMK2A	RAF1	S259	NetworKIN	0.0704419		CAMK2A	RAF1	S259	NetworKIN	0.221194		CAMK2A	RAF1	S259	NetworKIN	-0.06939		CAMK2A	RAF1	S259	NetworKIN	0.139441
		CAMK2A	FNIP1	S261	NetworKIN	0.148653		CAMK2A	FNIP1	S261	NetworKIN	0.464567		CAMK2A	FNIP1	S261	NetworKIN	0.227104		CAMK2A	FNIP1	S261	NetworKIN	0.0788174
		CAMK2A	FOXO4	S262	NetworKIN	0.0711383		CAMK2A	FOXO4	S262	NetworKIN	0.000152726		CAMK2A	FOXO4	S262	NetworKIN	0.0126721		CAMK2A	FOXO4	S262	NetworKIN	0.120714
		CAMK2A	SVIL	S263	NetworKIN	0.592139		CAMK2A	SVIL	S263	NetworKIN	0.328229		CAMK2A	SVIL	S263	NetworKIN	0.247866		CAMK2A	SVIL	S263	NetworKIN	0.158982
		CAMK2A	CCS	S267	NetworKIN	-0.577578		CAMK2A	CCS	S267	NetworKIN	-0.272823		CAMK2A	CCS	S267	NetworKIN	-0.0810447		CAMK2A	CCS	S267	NetworKIN	-0.186884
		CAMK2A	DOK1	S269	NetworKIN	0.49722		CAMK2A	DOK1	S269	NetworKIN	0.583852		CAMK2A	DOK1	S269	NetworKIN	0.438989		CAMK2A	DOK1	S269	NetworKIN	0.105692
		CAMK2A	PHKB	S27	NetworKIN	-0.0131102		CAMK2A	PHKB	S27	NetworKIN	0.00521404		CAMK2A	PHKB	S27	NetworKIN	0.134022		CAMK2A	PHKB	S27	NetworKIN	0.0483311
		CAMK2A	IRS1	S270	NetworKIN	0.0203466		CAMK2A	IRS1	S270	NetworKIN	0.0346936		CAMK2A	IRS1	S270	NetworKIN	-0.295139		CAMK2A	IRS1	S270	NetworKIN	-0.241222
		CAMK2A	TMX1	S270	NetworKIN	-1.36598		CAMK2A	TMX1	S270	NetworKIN	-0.586531		CAMK2A	TMX1	S270	NetworKIN	-1.09188		CAMK2A	TMX1	S270	NetworKIN	-1.04784
		CAMK2A	MTSS1	S272	NetworKIN	-0.157074		CAMK2A	MTSS1	S272	NetworKIN	0.0522101		CAMK2A	MTSS1	S272	NetworKIN	-0.136252		CAMK2A	MTSS1	S272	NetworKIN	-0.0510968
		CAMK2A	SLC43A2	S274	NetworKIN	-0.339868		CAMK2A	SLC43A2	S274	NetworKIN	-0.116741		CAMK2A	SLC43A2	S274	NetworKIN	-0.00118167		CAMK2A	SLC43A2	S274	NetworKIN	-0.334235
		CAMK2A	DCP1B	S275	NetworKIN	-0.142158		CAMK2A	DCP1B	S275	NetworKIN	-0.0805389		CAMK2A	DCP1B	S275	NetworKIN	-0.144374		CAMK2A	DCP1B	S275	NetworKIN	-0.0406644
		CAMK2A	LRRC41	S276	NetworKIN	0.185082		CAMK2A	LRRC41	S276	NetworKIN	0.191419		CAMK2A	LRRC41	S276	NetworKIN	0.0376561		CAMK2A	LRRC41	S276	NetworKIN	0.0208525
		CAMK2A	ARFGEF2	S277	NetworKIN	-0.1201		CAMK2A	ARFGEF2	S277	NetworKIN	0.233681		CAMK2A	ARFGEF2	S277	NetworKIN	-0.183086		CAMK2A	ARFGEF2	S277	NetworKIN	0.122068
		CAMK2A	MAPK1	S284	NetworKIN	0.18042		CAMK2A	MAPK1	S284	NetworKIN	0.0671496		CAMK2A	MAPK1	S284	NetworKIN	0.371742		CAMK2A	MAPK1	S284	NetworKIN	0.144199
		CAMK2A	RYR1	S2843	NetworKIN	-0.260699		CAMK2A	RYR1	S2843	NetworKIN	-0.0532516		CAMK2A	RYR1	S2843	NetworKIN	0.141494		CAMK2A	RYR1	S2843	NetworKIN	-0.165512
		CAMK2A	RALBP1	S29	NetworKIN	-0.188045		CAMK2A	RALBP1	S29	NetworKIN	0.0186289		CAMK2A	RALBP1	S29	NetworKIN	-0.242785		CAMK2A	RALBP1	S29	NetworKIN	-0.109331
		CAMK2A	MTFR1	S290	NetworKIN	-0.446752		CAMK2A	MTFR1	S290	NetworKIN	-0.0250676		CAMK2A	MTFR1	S290	NetworKIN	-0.158692		CAMK2A	MTFR1	S290	NetworKIN	-0.307688
		CAMK2A	SLC9A3R1	S290	NetworKIN	-0.222462		CAMK2A	SLC9A3R1	S290	NetworKIN	0.152546		CAMK2A	SLC9A3R1	S290	NetworKIN	-0.26415		CAMK2A	SLC9A3R1	S290	NetworKIN	0.149848
		CAMK2A	RBM15	S292	NetworKIN	0.216667		CAMK2A	RBM15	S292	NetworKIN	0.0476046		CAMK2A	RBM15	S292	NetworKIN	0.536356		CAMK2A	RBM15	S292	NetworKIN	0.0385206
		CAMK2A	LARP7	S298	NetworKIN	0.110178		CAMK2A	LARP7	S298	NetworKIN	0.0787785		CAMK2A	LARP7	S298	NetworKIN	0.136159		CAMK2A	LARP7	S298	NetworKIN	0.238282
		CAMK2A	DAPK2	S299	NetworKIN	0.0505496		CAMK2A	DAPK2	S299	NetworKIN	0.119768		CAMK2A	DAPK2	S299	NetworKIN	-0.0580825		CAMK2A	DAPK2	S299	NetworKIN	-0.0594291
		CAMK2A	LARP7	S300	NetworKIN	-0.0933376		CAMK2A	LARP7	S300	NetworKIN	0.0289071		CAMK2A	LARP7	S300	NetworKIN	0.034994		CAMK2A	LARP7	S300	NetworKIN	-0.148967
		CAMK2A	FAM110B	S301	NetworKIN	-0.345957		CAMK2A	FAM110B	S301	NetworKIN	-0.0854356		CAMK2A	FAM110B	S301	NetworKIN	-0.239488		CAMK2A	FAM110B	S301	NetworKIN	-0.281245
		CAMK2A	PIKFYVE	S307	NetworKIN	-0.0394816		CAMK2A	PIKFYVE	S307	NetworKIN	-0.0333236		CAMK2A	PIKFYVE	S307	NetworKIN	-0.0511555		CAMK2A	PIKFYVE	S307	NetworKIN	0.011358
		CAMK2A	MIB2	S309	NetworKIN	0.00303846		CAMK2A	MIB2	S309	NetworKIN	-0.0011482		CAMK2A	MIB2	S309	NetworKIN	0.0384583		CAMK2A	MIB2	S309	NetworKIN	0.136937
		CAMK2A	BCKDK	S31	NetworKIN	-0.0742961		CAMK2A	BCKDK	S31	NetworKIN	-0.097545		CAMK2A	BCKDK	S31	NetworKIN	-0.0534196		CAMK2A	BCKDK	S31	NetworKIN	0.12965
		CAMK2A	STK11	S31	NetworKIN	0.00823083		CAMK2A	STK11	S31	NetworKIN	-0.0978101		CAMK2A	STK11	S31	NetworKIN	0.0205488		CAMK2A	STK11	S31	NetworKIN	0.0360235
		CAMK2A	FOXO3	S315	NetworKIN	0.282828		CAMK2A	FOXO3	S315	NetworKIN	0.103762		CAMK2A	FOXO3	S315	NetworKIN	0.745378		CAMK2A	FOXO3	S315	NetworKIN	0.405516
		CAMK2A	ITSN1	S315	NetworKIN	-0.542552		CAMK2A	ITSN1	S315	NetworKIN	-0.230247		CAMK2A	ITSN1	S315	NetworKIN	-0.308258		CAMK2A	ITSN1	S315	NetworKIN	-0.186774
		CAMK2A	SCAMP2	S319	NetworKIN	0.124838		CAMK2A	SCAMP2	S319	NetworKIN	0.603282		CAMK2A	SCAMP2	S319	NetworKIN	-0.197028		CAMK2A	SCAMP2	S319	NetworKIN	0.0410411
		CAMK2A	LTB4R	S320	NetworKIN	1.30756		CAMK2A	LTB4R	S320	NetworKIN	0.495965		CAMK2A	LTB4R	S320	NetworKIN	1.71336		CAMK2A	LTB4R	S320	NetworKIN	0.267466
		CAMK2A	KANK1	S325	NetworKIN	0.0437831		CAMK2A	KANK1	S325	NetworKIN	-0.112725		CAMK2A	KANK1	S325	NetworKIN	0.153901		CAMK2A	KANK1	S325	NetworKIN	0.0325624
		CAMK2A	CCNY	S326	NetworKIN	0.102835		CAMK2A	CCNY	S326	NetworKIN	-0.0277667		CAMK2A	CCNY	S326	NetworKIN	-0.072494		CAMK2A	CCNY	S326	NetworKIN	-0.00301909
		CAMK2A	LRRFIP2	S328	NetworKIN	0.057322		CAMK2A	LRRFIP2	S328	NetworKIN	-0.0331744		CAMK2A	LRRFIP2	S328	NetworKIN	-0.0679363		CAMK2A	LRRFIP2	S328	NetworKIN	0.105873
		CAMK2A	MAP4K2	S328	NetworKIN	0.0380477		CAMK2A	MAP4K2	S328	NetworKIN	0.406455		CAMK2A	MAP4K2	S328	NetworKIN	0.02302		CAMK2A	MAP4K2	S328	NetworKIN	0.141664
		CAMK2A	RASIP1	S328	NetworKIN	0.0440745		CAMK2A	RASIP1	S328	NetworKIN	-0.26252		CAMK2A	RASIP1	S328	NetworKIN	-0.059575		CAMK2A	RASIP1	S328	NetworKIN	0.0390387
		CAMK2A	DOK3	S330	NetworKIN	0.178258		CAMK2A	DOK3	S330	NetworKIN	1.30057		CAMK2A	DOK3	S330	NetworKIN	0.288294		CAMK2A	DOK3	S330	NetworKIN	0.54231
		CAMK2A	NDRG2	S332	NetworKIN	0.102974		CAMK2A	NDRG2	S332	NetworKIN	-0.0661698		CAMK2A	NDRG2	S332	NetworKIN	-0.081785		CAMK2A	NDRG2	S332	NetworKIN	-0.015753
		CAMK2A	SLC25A46	S34	NetworKIN	0.144572		CAMK2A	SLC25A46	S34	NetworKIN	0.106761		CAMK2A	SLC25A46	S34	NetworKIN	-0.096556		CAMK2A	SLC25A46	S34	NetworKIN	0.132561
		CAMK2A	TBC1D4	S341	NetworKIN	-0.0804043		CAMK2A	TBC1D4	S341	NetworKIN	-0.13684		CAMK2A	TBC1D4	S341	NetworKIN	-0.0128324		CAMK2A	TBC1D4	S341	NetworKIN	0.154523
		CAMK2A	OPTN	S342	NetworKIN	-0.30978		CAMK2A	OPTN	S342	NetworKIN	0.589175		CAMK2A	OPTN	S342	NetworKIN	-0.311716		CAMK2A	OPTN	S342	NetworKIN	0.309723
		CAMK2A	WDR44	S344	NetworKIN	-0.0470255		CAMK2A	WDR44	S344	NetworKIN	0.308119		CAMK2A	WDR44	S344	NetworKIN	-0.220239		CAMK2A	WDR44	S344	NetworKIN	0.216286
		CAMK2A	CLIP1	S348	NetworKIN	-0.646233		CAMK2A	CLIP1	S348	NetworKIN	0.425052		CAMK2A	CLIP1	S348	NetworKIN	0.0311606		CAMK2A	CLIP1	S348	NetworKIN	-0.440843
		CAMK2A	RIN1	S351	NetworKIN	-0.372316		CAMK2A	RIN1	S351	NetworKIN	-0.0704656		CAMK2A	RIN1	S351	NetworKIN	-0.218502		CAMK2A	RIN1	S351	NetworKIN	-0.204732
		CAMK2A	PPP1R16A	S353	NetworKIN	0.10915		CAMK2A	PPP1R16A	S353	NetworKIN	0.259051		CAMK2A	PPP1R16A	S353	NetworKIN	0.228073		CAMK2A	PPP1R16A	S353	NetworKIN	0.664228
		CAMK2A	ZC3HC1	S354	NetworKIN	0.217024		CAMK2A	ZC3HC1	S354	NetworKIN	0.203439		CAMK2A	ZC3HC1	S354	NetworKIN	-0.00329617		CAMK2A	ZC3HC1	S354	NetworKIN	0.346283
		CAMK2A	SPN	S355	NetworKIN	0.245779		CAMK2A	SPN	S355	NetworKIN	0.543799		CAMK2A	SPN	S355	NetworKIN	0.559485		CAMK2A	SPN	S355	NetworKIN	-0.125776
		CAMK2A	FHOD1	S357	NetworKIN	-0.438692		CAMK2A	FHOD1	S357	NetworKIN	0.469841		CAMK2A	FHOD1	S357	NetworKIN	0.247206		CAMK2A	FHOD1	S357	NetworKIN	0.221992
		CAMK2A	SIK2	S358	NetworKIN	0.0127651		CAMK2A	SIK2	S358	NetworKIN	0.587806		CAMK2A	SIK2	S358	NetworKIN	-0.222143		CAMK2A	SIK2	S358	NetworKIN	-0.122957
		CAMK2A	ALDOC	S36	NetworKIN	-0.295906		CAMK2A	ALDOC	S36	NetworKIN	-0.0217576		CAMK2A	ALDOC	S36	NetworKIN	-0.255628		CAMK2A	ALDOC	S36	NetworKIN	-0.252943
		CAMK2A	EBAG9	S36	NetworKIN	0.040782		CAMK2A	EBAG9	S36	NetworKIN	0.215724		CAMK2A	EBAG9	S36	NetworKIN	-0.0618845		CAMK2A	EBAG9	S36	NetworKIN	0.132488
		CAMK2A	DMD	S3623	NetworKIN	0.108027		CAMK2A	DMD	S3623	NetworKIN	-0.0922962		CAMK2A	DMD	S3623	NetworKIN	-0.0283603		CAMK2A	DMD	S3623	NetworKIN	0.0746526
		CAMK2A	PRKCE	S368	NetworKIN	-0.809184		CAMK2A	PRKCE	S368	NetworKIN	-0.332645		CAMK2A	PRKCE	S368	NetworKIN	-0.412285		CAMK2A	PRKCE	S368	NetworKIN	-0.605137
		CAMK2A	NUP107	S37	NetworKIN	-0.074238		CAMK2A	NUP107	S37	NetworKIN	-0.0320016		CAMK2A	NUP107	S37	NetworKIN	0.0314342		CAMK2A	NUP107	S37	NetworKIN	-0.0741096
		CAMK2A	HIRIP3	S370	NetworKIN	-0.0535768		CAMK2A	HIRIP3	S370	NetworKIN	-0.215592		CAMK2A	HIRIP3	S370	NetworKIN	-0.116902		CAMK2A	HIRIP3	S370	NetworKIN	0.0923966
		CAMK2A	OSBP	S379	NetworKIN	-0.60439		CAMK2A	OSBP	S379	NetworKIN	-0.46697		CAMK2A	OSBP	S379	NetworKIN	-0.177978		CAMK2A	OSBP	S379	NetworKIN	-0.153835
		CAMK2A	ATP2A2	S38	NetworKIN	0.0755496		CAMK2A	ATP2A2	S38	NetworKIN	-0.376439		CAMK2A	ATP2A2	S38	NetworKIN	-0.0376234		CAMK2A	ATP2A2	S38	NetworKIN	0.00207467
		CAMK2A	LATS2	S380	NetworKIN	-0.443726		CAMK2A	LATS2	S380	NetworKIN	-0.175095		CAMK2A	LATS2	S380	NetworKIN	-0.0877109		CAMK2A	LATS2	S380	NetworKIN	0.00953299
		CAMK2A	PLIN1	S382	NetworKIN	-0.140497		CAMK2A	PLIN1	S382	NetworKIN	-1.00138		CAMK2A	PLIN1	S382	NetworKIN	-0.209175		CAMK2A	PLIN1	S382	NetworKIN	0.547149
		CAMK2A	HTATSF1	S387	NetworKIN	-0.271151		CAMK2A	HTATSF1	S387	NetworKIN	0.0828343		CAMK2A	HTATSF1	S387	NetworKIN	-0.482264		CAMK2A	HTATSF1	S387	NetworKIN	0.14551
		CAMK2A	MAP3K7	S389	NetworKIN	-0.12889		CAMK2A	MAP3K7	S389	NetworKIN	-0.157954		CAMK2A	MAP3K7	S389	NetworKIN	-0.133467		CAMK2A	MAP3K7	S389	NetworKIN	-0.418626
		CAMK2A	VIM	S39	NetworKIN	-0.298372		CAMK2A	VIM	S39	NetworKIN	-0.109572		CAMK2A	VIM	S39	NetworKIN	-0.214707		CAMK2A	VIM	S39	NetworKIN	-0.234692
		CAMK2A	CAMK2B	S394	NetworKIN	-0.583267		CAMK2A	CAMK2B	S394	NetworKIN	-0.350537		CAMK2A	CAMK2B	S394	NetworKIN	-0.786503		CAMK2A	CAMK2B	S394	NetworKIN	-0.62616
		CAMK2A	SNTB2	S395	NetworKIN	-0.0348655		CAMK2A	SNTB2	S395	NetworKIN	0.216929		CAMK2A	SNTB2	S395	NetworKIN	-0.149339		CAMK2A	SNTB2	S395	NetworKIN	-0.0243146
		CAMK2A	UBE2O	S399	NetworKIN	-0.162367		CAMK2A	UBE2O	S399	NetworKIN	-0.231539		CAMK2A	UBE2O	S399	NetworKIN	-0.161838		CAMK2A	UBE2O	S399	NetworKIN	-0.253032
		CAMK2A	LMNA	S404	NetworKIN	0.548957		CAMK2A	LMNA	S404	NetworKIN	0.0910877		CAMK2A	LMNA	S404	NetworKIN	0.0388923		CAMK2A	LMNA	S404	NetworKIN	0.27784
		CAMK2A	PNPLA2	S404	NetworKIN	0.27255		CAMK2A	PNPLA2	S404	NetworKIN	-0.146257		CAMK2A	PNPLA2	S404	NetworKIN	-0.103032		CAMK2A	PNPLA2	S404	NetworKIN	-0.193921
		CAMK2A	EIF4B	S406	NetworKIN	0.200993		CAMK2A	EIF4B	S406	NetworKIN	0.181979		CAMK2A	EIF4B	S406	NetworKIN	0.265629		CAMK2A	EIF4B	S406	NetworKIN	0.122314
		CAMK2A	RABEP1	S407	NetworKIN	0.271088		CAMK2A	RABEP1	S407	NetworKIN	0.38885		CAMK2A	RABEP1	S407	NetworKIN	0.123421		CAMK2A	RABEP1	S407	NetworKIN	0.377833
		CAMK2A	SASH1	S407	NetworKIN	0.0641561		CAMK2A	SASH1	S407	NetworKIN	-0.0660293		CAMK2A	SASH1	S407	NetworKIN	-0.233558		CAMK2A	SASH1	S407	NetworKIN	-0.16366
		CAMK2A	ZC3HC1	S407	NetworKIN	0.890377		CAMK2A	ZC3HC1	S407	NetworKIN	1.0776		CAMK2A	ZC3HC1	S407	NetworKIN	0.00879634		CAMK2A	ZC3HC1	S407	NetworKIN	0.171514
		CAMK2A	SNX17	S409	NetworKIN	0.403351		CAMK2A	SNX17	S409	NetworKIN	0.733945		CAMK2A	SNX17	S409	NetworKIN	0.470532		CAMK2A	SNX17	S409	NetworKIN	0.59295
		CAMK2A	ARHGEF12	S41	NetworKIN	-0.0366862		CAMK2A	ARHGEF12	S41	NetworKIN	0.112637		CAMK2A	ARHGEF12	S41	NetworKIN	-0.0619011		CAMK2A	ARHGEF12	S41	NetworKIN	0.186331
		CAMK2A	GOLGA4	S41	NetworKIN	-0.0979603		CAMK2A	GOLGA4	S41	NetworKIN	-0.159202		CAMK2A	GOLGA4	S41	NetworKIN	-0.0915388		CAMK2A	GOLGA4	S41	NetworKIN	-0.0686585
		CAMK2A	NUMBL	S411	NetworKIN	0.717947		CAMK2A	NUMBL	S411	NetworKIN	0.275514		CAMK2A	NUMBL	S411	NetworKIN	0.407573		CAMK2A	NUMBL	S411	NetworKIN	0.61669
		CAMK2A	GTF2I	S412	NetworKIN	0.417829		CAMK2A	GTF2I	S412	NetworKIN	1.11301		CAMK2A	GTF2I	S412	NetworKIN	0.020363		CAMK2A	GTF2I	S412	NetworKIN	0.275942
		CAMK2A	ACTR10	S414	NetworKIN	-0.0962302		CAMK2A	ACTR10	S414	NetworKIN	0.0524276		CAMK2A	ACTR10	S414	NetworKIN	-0.204259		CAMK2A	ACTR10	S414	NetworKIN	-0.112386
		CAMK2A	BCL2L13	S420	NetworKIN	-0.926041		CAMK2A	BCL2L13	S420	NetworKIN	-0.279349		CAMK2A	BCL2L13	S420	NetworKIN	-1.15066		CAMK2A	BCL2L13	S420	NetworKIN	-0.847502
		CAMK2A	TNKS1BP1	S429	NetworKIN	-0.14204		CAMK2A	TNKS1BP1	S429	NetworKIN	-0.0697841		CAMK2A	TNKS1BP1	S429	NetworKIN	-0.118482		CAMK2A	TNKS1BP1	S429	NetworKIN	-0.0634524
		CAMK2A	RAF1	S43	NetworKIN	0.116785		CAMK2A	RAF1	S43	NetworKIN	-0.0508473		CAMK2A	RAF1	S43	NetworKIN	0.0418492		CAMK2A	RAF1	S43	NetworKIN	0.137959
		CAMK2A	EXOC2	S432	NetworKIN	0.0247059		CAMK2A	EXOC2	S432	NetworKIN	-0.0893618		CAMK2A	EXOC2	S432	NetworKIN	-0.193256		CAMK2A	EXOC2	S432	NetworKIN	-0.23464
		CAMK2A	PTPN12	S435	NetworKIN	0.0463041		CAMK2A	PTPN12	S435	NetworKIN	0.0425861		CAMK2A	PTPN12	S435	NetworKIN	0.0446708		CAMK2A	PTPN12	S435	NetworKIN	-0.0199989
		CAMK2A	FLII	S436	NetworKIN	-0.875225		CAMK2A	FLII	S436	NetworKIN	0.259919		CAMK2A	FLII	S436	NetworKIN	-0.214266		CAMK2A	FLII	S436	NetworKIN	0.754908
		CAMK2A	MAP3K7	S439	NetworKIN	-0.167399		CAMK2A	MAP3K7	S439	NetworKIN	-0.00522858		CAMK2A	MAP3K7	S439	NetworKIN	-0.413548		CAMK2A	MAP3K7	S439	NetworKIN	-0.174915
		CAMK2A	CEP170	S446	NetworKIN	-0.486154		CAMK2A	CEP170	S446	NetworKIN	-0.237018		CAMK2A	CEP170	S446	NetworKIN	-0.220689		CAMK2A	CEP170	S446	NetworKIN	-0.247513
		CAMK2A	DDHD2	S447	NetworKIN	-0.801619		CAMK2A	DDHD2	S447	NetworKIN	-0.0349063		CAMK2A	DDHD2	S447	NetworKIN	-0.633009		CAMK2A	DDHD2	S447	NetworKIN	-0.546024
		CAMK2A	SART1	S448	NetworKIN	0.0991749		CAMK2A	SART1	S448	NetworKIN	0.20085		CAMK2A	SART1	S448	NetworKIN	-0.0770368		CAMK2A	SART1	S448	NetworKIN	0.141226
		CAMK2A	GLUD1	S450	NetworKIN	-0.118903		CAMK2A	GLUD1	S450	NetworKIN	0.176349		CAMK2A	GLUD1	S450	NetworKIN	0.127022		CAMK2A	GLUD1	S450	NetworKIN	0.138656
		CAMK2A	TRIM3	S454	NetworKIN	-0.0704879		CAMK2A	TRIM3	S454	NetworKIN	-0.178426		CAMK2A	TRIM3	S454	NetworKIN	-0.260738		CAMK2A	TRIM3	S454	NetworKIN	-0.290303
		CAMK2A	ACLY	S455	NetworKIN	0.146425		CAMK2A	ACLY	S455	NetworKIN	0.250817		CAMK2A	ACLY	S455	NetworKIN	-0.0447445		CAMK2A	ACLY	S455	NetworKIN	-0.039271
		CAMK2A	MTSS1L	S456	NetworKIN	-0.337282		CAMK2A	MTSS1L	S456	NetworKIN	0.0975044		CAMK2A	MTSS1L	S456	NetworKIN	-0.220082		CAMK2A	MTSS1L	S456	NetworKIN	-0.0554958
		CAMK2A	PDCD4	S457	NetworKIN	0.205973		CAMK2A	PDCD4	S457	NetworKIN	0.022999		CAMK2A	PDCD4	S457	NetworKIN	-0.00299358		CAMK2A	PDCD4	S457	NetworKIN	-0.0444681
		CAMK2A	PDE8A	S457	NetworKIN	-0.166324		CAMK2A	PDE8A	S457	NetworKIN	0.0943921		CAMK2A	PDE8A	S457	NetworKIN	-0.188793		CAMK2A	PDE8A	S457	NetworKIN	0.0894476
		CAMK2A	CD2AP	S458	NetworKIN	0.476602		CAMK2A	CD2AP	S458	NetworKIN	-0.0699334		CAMK2A	CD2AP	S458	NetworKIN	0.193005		CAMK2A	CD2AP	S458	NetworKIN	0.335112
		CAMK2A	LMNA	S458	NetworKIN	-0.107189		CAMK2A	LMNA	S458	NetworKIN	-0.0781412		CAMK2A	LMNA	S458	NetworKIN	0.0051237		CAMK2A	LMNA	S458	NetworKIN	0.0106435
		CAMK2A	PFKFB3	S461	NetworKIN	-0.111031		CAMK2A	PFKFB3	S461	NetworKIN	0.135618		CAMK2A	PFKFB3	S461	NetworKIN	0.0575662		CAMK2A	PFKFB3	S461	NetworKIN	0.0902927
		CAMK2A	EPB41L1	S466	NetworKIN	-0.384621		CAMK2A	EPB41L1	S466	NetworKIN	-0.41722		CAMK2A	EPB41L1	S466	NetworKIN	-0.102427		CAMK2A	EPB41L1	S466	NetworKIN	-0.112614
		CAMK2A	PFKFB2	S466	NetworKIN	-0.0114589		CAMK2A	PFKFB2	S466	NetworKIN	-0.142694		CAMK2A	PFKFB2	S466	NetworKIN	-0.0777477		CAMK2A	PFKFB2	S466	NetworKIN	0.0453006
		CAMK2A	TRAFD1	S470	NetworKIN	-0.49123		CAMK2A	TRAFD1	S470	NetworKIN	0.000175091		CAMK2A	TRAFD1	S470	NetworKIN	-0.550524		CAMK2A	TRAFD1	S470	NetworKIN	-0.254437
		CAMK2A	TRIM28	S473	NetworKIN	0.821735		CAMK2A	TRIM28	S473	NetworKIN	0.586597		CAMK2A	TRIM28	S473	NetworKIN	0.423271		CAMK2A	TRIM28	S473	NetworKIN	0.177877
		CAMK2A	GPSM2	S483	NetworKIN	-0.606358		CAMK2A	GPSM2	S483	NetworKIN	-0.658183		CAMK2A	GPSM2	S483	NetworKIN	-0.864055		CAMK2A	GPSM2	S483	NetworKIN	-0.332829
		CAMK2A	PFKFB2	S483	NetworKIN	0.697457		CAMK2A	PFKFB2	S483	NetworKIN	0.22437		CAMK2A	PFKFB2	S483	NetworKIN	0.667673		CAMK2A	PFKFB2	S483	NetworKIN	0.929292
		CAMK2A	SLC2A4	S488	NetworKIN	0.0254061		CAMK2A	SLC2A4	S488	NetworKIN	0.271042		CAMK2A	SLC2A4	S488	NetworKIN	0.00439387		CAMK2A	SLC2A4	S488	NetworKIN	0.319456
		CAMK2A	PRKAA2	S491	NetworKIN	-0.673583		CAMK2A	PRKAA2	S491	NetworKIN	-0.597392		CAMK2A	PRKAA2	S491	NetworKIN	-0.436266		CAMK2A	PRKAA2	S491	NetworKIN	-0.584788
		CAMK2A	LIMCH1	S493	NetworKIN	-0.173834		CAMK2A	LIMCH1	S493	NetworKIN	0.166187		CAMK2A	LIMCH1	S493	NetworKIN	-0.153451		CAMK2A	LIMCH1	S493	NetworKIN	-0.107689
		CAMK2A	LSR	S493	NetworKIN	0.141335		CAMK2A	LSR	S493	NetworKIN	-0.0124456		CAMK2A	LSR	S493	NetworKIN	0.0844531		CAMK2A	LSR	S493	NetworKIN	0.0747248
		CAMK2A	LARP4B	S498	NetworKIN	-0.0249115		CAMK2A	LARP4B	S498	NetworKIN	0.00626908		CAMK2A	LARP4B	S498	NetworKIN	0.279352		CAMK2A	LARP4B	S498	NetworKIN	0.0411011
		CAMK2A	ABLIM3	S503	NetworKIN	-0.505338		CAMK2A	ABLIM3	S503	NetworKIN	-0.304745		CAMK2A	ABLIM3	S503	NetworKIN	-0.180517		CAMK2A	ABLIM3	S503	NetworKIN	-0.219543
		CAMK2A	TBC1D25	S506	NetworKIN	-0.109498		CAMK2A	TBC1D25	S506	NetworKIN	-0.109024		CAMK2A	TBC1D25	S506	NetworKIN	-0.140819		CAMK2A	TBC1D25	S506	NetworKIN	-0.0462271
		CAMK2A	AMFR	S509	NetworKIN	-0.153576		CAMK2A	AMFR	S509	NetworKIN	-0.163424		CAMK2A	AMFR	S509	NetworKIN	-0.134785		CAMK2A	AMFR	S509	NetworKIN	-0.117283
		CAMK2A	EPB41L1	S510	NetworKIN	-0.0720091		CAMK2A	EPB41L1	S510	NetworKIN	0.00322509		CAMK2A	EPB41L1	S510	NetworKIN	-0.0926616		CAMK2A	EPB41L1	S510	NetworKIN	0.0765045
		CAMK2A	MAPKAP1	S510	NetworKIN	0.0976694		CAMK2A	MAPKAP1	S510	NetworKIN	0.0972965		CAMK2A	MAPKAP1	S510	NetworKIN	0.0429123		CAMK2A	MAPKAP1	S510	NetworKIN	0.061583
		CAMK2A	SAFB2	S513	NetworKIN	0.159744		CAMK2A	SAFB2	S513	NetworKIN	0.436849		CAMK2A	SAFB2	S513	NetworKIN	-0.104089		CAMK2A	SAFB2	S513	NetworKIN	0.244969
		CAMK2A	PEBP1	S52	NetworKIN	-0.0794621		CAMK2A	PEBP1	S52	NetworKIN	-0.120339		CAMK2A	PEBP1	S52	NetworKIN	-0.199903		CAMK2A	PEBP1	S52	NetworKIN	-0.0981516
		CAMK2A	DCP1A	S522	NetworKIN	-0.336431		CAMK2A	DCP1A	S522	NetworKIN	0.0152036		CAMK2A	DCP1A	S522	NetworKIN	-0.305825		CAMK2A	DCP1A	S522	NetworKIN	-0.207496
		CAMK2A	PI4KB	S523	NetworKIN	-0.00354601		CAMK2A	PI4KB	S523	NetworKIN	0.00156491		CAMK2A	PI4KB	S523	NetworKIN	-0.126155		CAMK2A	PI4KB	S523	NetworKIN	0.038609
		CAMK2A	PRPF38B	S529	NetworKIN	-0.224654		CAMK2A	PRPF38B	S529	NetworKIN	-0.236337		CAMK2A	PRPF38B	S529	NetworKIN	-0.210275		CAMK2A	PRPF38B	S529	NetworKIN	0.0204675
		CAMK2A	ADD2	S532	NetworKIN	0.919209		CAMK2A	ADD2	S532	NetworKIN	2.166		CAMK2A	ADD2	S532	NetworKIN	0.225449		CAMK2A	ADD2	S532	NetworKIN	0.671267
		CAMK2A	KANK2	S540	NetworKIN	-0.0871925		CAMK2A	KANK2	S540	NetworKIN	-0.110801		CAMK2A	KANK2	S540	NetworKIN	-0.207709		CAMK2A	KANK2	S540	NetworKIN	-0.12252
		CAMK2A	MAP1B	S541	NetworKIN	-0.487644		CAMK2A	MAP1B	S541	NetworKIN	-0.595475		CAMK2A	MAP1B	S541	NetworKIN	-0.122771		CAMK2A	MAP1B	S541	NetworKIN	-0.13703
		CAMK2A	PARN	S557	NetworKIN	-0.00422503		CAMK2A	PARN	S557	NetworKIN	0.443458		CAMK2A	PARN	S557	NetworKIN	-0.278717		CAMK2A	PARN	S557	NetworKIN	-0.0197787
		CAMK2A	IRS2	S560	NetworKIN	-0.111161		CAMK2A	IRS2	S560	NetworKIN	-0.138851		CAMK2A	IRS2	S560	NetworKIN	0.00682105		CAMK2A	IRS2	S560	NetworKIN	0.0657277
		CAMK2A	NOP56	S563	NetworKIN	0.909535		CAMK2A	NOP56	S563	NetworKIN	1.17661		CAMK2A	NOP56	S563	NetworKIN	0.100719		CAMK2A	NOP56	S563	NetworKIN	0.666243
		CAMK2A	PHLDB1	S563	NetworKIN	-0.231827		CAMK2A	PHLDB1	S563	NetworKIN	0.094208		CAMK2A	PHLDB1	S563	NetworKIN	-0.269335		CAMK2A	PHLDB1	S563	NetworKIN	0.0863341
		CAMK2A	MTSS1L	S569	NetworKIN	0.0662137		CAMK2A	MTSS1L	S569	NetworKIN	0.0573962		CAMK2A	MTSS1L	S569	NetworKIN	-0.274811		CAMK2A	MTSS1L	S569	NetworKIN	0.142134
		CAMK2A	THRAP3	S575	NetworKIN	0.00240605		CAMK2A	THRAP3	S575	NetworKIN	0.140522		CAMK2A	THRAP3	S575	NetworKIN	-0.386507		CAMK2A	THRAP3	S575	NetworKIN	-0.458164
		CAMK2A	AHNAK	S5780	NetworKIN	1.65234		CAMK2A	AHNAK	S5780	NetworKIN	1.22283		CAMK2A	AHNAK	S5780	NetworKIN	0.612805		CAMK2A	AHNAK	S5780	NetworKIN	0.704701
		CAMK2A	AHNAK	S5782	NetworKIN	-0.883649		CAMK2A	AHNAK	S5782	NetworKIN	-0.65282		CAMK2A	AHNAK	S5782	NetworKIN	-0.221672		CAMK2A	AHNAK	S5782	NetworKIN	-0.0509201
		CAMK2A	MTSS1L	S579	NetworKIN	-0.0392863		CAMK2A	MTSS1L	S579	NetworKIN	0.143618		CAMK2A	MTSS1L	S579	NetworKIN	-0.0927571		CAMK2A	MTSS1L	S579	NetworKIN	-0.0632025
		CAMK2A	NOP2	S58	NetworKIN	0.572292		CAMK2A	NOP2	S58	NetworKIN	0.746948		CAMK2A	NOP2	S58	NetworKIN	-0.0977546		CAMK2A	NOP2	S58	NetworKIN	0.320759
		CAMK2A	ARAF	S582	NetworKIN	-0.18131		CAMK2A	ARAF	S582	NetworKIN	-0.190912		CAMK2A	ARAF	S582	NetworKIN	-0.140336		CAMK2A	ARAF	S582	NetworKIN	0.0123466
		CAMK2A	KLC2	S582	NetworKIN	0.107092		CAMK2A	KLC2	S582	NetworKIN	-0.128758		CAMK2A	KLC2	S582	NetworKIN	-0.0377112		CAMK2A	KLC2	S582	NetworKIN	0.134231
		CAMK2A	PKN2	S583	NetworKIN	-0.00539347		CAMK2A	PKN2	S583	NetworKIN	0.160281		CAMK2A	PKN2	S583	NetworKIN	-0.453926		CAMK2A	PKN2	S583	NetworKIN	-0.27182
		CAMK2A	TBC1D4	S588	NetworKIN	0.4623		CAMK2A	TBC1D4	S588	NetworKIN	-0.0386128		CAMK2A	TBC1D4	S588	NetworKIN	0.15869		CAMK2A	TBC1D4	S588	NetworKIN	0.187784
		CAMK2A	CRYAB	S59	NetworKIN	0.73125		CAMK2A	CRYAB	S59	NetworKIN	1.09002		CAMK2A	CRYAB	S59	NetworKIN	-0.604383		CAMK2A	CRYAB	S59	NetworKIN	1.35463
		CAMK2A	ZC3H18	S59	NetworKIN	-0.0452769		CAMK2A	ZC3H18	S59	NetworKIN	-0.0380219		CAMK2A	ZC3H18	S59	NetworKIN	-0.0289958		CAMK2A	ZC3H18	S59	NetworKIN	0.070955
		CAMK2A	CLASP1	S600	NetworKIN	-0.13849		CAMK2A	CLASP1	S600	NetworKIN	-0.159591		CAMK2A	CLASP1	S600	NetworKIN	-0.23388		CAMK2A	CLASP1	S600	NetworKIN	-0.132912
		CAMK2A	MINK1	S601	NetworKIN	-0.203503		CAMK2A	MINK1	S601	NetworKIN	0.0551362		CAMK2A	MINK1	S601	NetworKIN	-0.294171		CAMK2A	MINK1	S601	NetworKIN	0.0458019
		CAMK2A	MTMR10	S607	NetworKIN	-0.401226		CAMK2A	MTMR10	S607	NetworKIN	-0.123566		CAMK2A	MTMR10	S607	NetworKIN	-0.290733		CAMK2A	MTMR10	S607	NetworKIN	-0.356209
		CAMK2A	MTSS1L	S612	NetworKIN	0.0807235		CAMK2A	MTSS1L	S612	NetworKIN	0.19301		CAMK2A	MTSS1L	S612	NetworKIN	0.0367304		CAMK2A	MTSS1L	S612	NetworKIN	0.022407
		CAMK2A	MLXIPL	S614	NetworKIN	0.059691		CAMK2A	MLXIPL	S614	NetworKIN	-0.0481467		CAMK2A	MLXIPL	S614	NetworKIN	0.0303902		CAMK2A	MLXIPL	S614	NetworKIN	0.0848219
		CAMK2A	MED14	S617	NetworKIN	0.221224		CAMK2A	MED14	S617	NetworKIN	0.0864628		CAMK2A	MED14	S617	NetworKIN	0.393639		CAMK2A	MED14	S617	NetworKIN	0.172395
		CAMK2A	BCAM	S621	NetworKIN	0.128958		CAMK2A	BCAM	S621	NetworKIN	0.151785		CAMK2A	BCAM	S621	NetworKIN	0.0472419		CAMK2A	BCAM	S621	NetworKIN	0.00756006
		CAMK2A	FMNL1	S624	NetworKIN	-0.147193		CAMK2A	FMNL1	S624	NetworKIN	-0.0366085		CAMK2A	FMNL1	S624	NetworKIN	-0.0291393		CAMK2A	FMNL1	S624	NetworKIN	-0.23806
		CAMK2A	AKAP12	S627	NetworKIN	-0.586515		CAMK2A	AKAP12	S627	NetworKIN	-0.383762		CAMK2A	AKAP12	S627	NetworKIN	-0.591325		CAMK2A	AKAP12	S627	NetworKIN	-0.410645
		CAMK2A	TBC1D1	S627	NetworKIN	-0.219338		CAMK2A	TBC1D1	S627	NetworKIN	0.0484353		CAMK2A	TBC1D1	S627	NetworKIN	-0.125587		CAMK2A	TBC1D1	S627	NetworKIN	-0.177402
		CAMK2A	IRS1	S629	NetworKIN	-0.287644		CAMK2A	IRS1	S629	NetworKIN	-0.148885		CAMK2A	IRS1	S629	NetworKIN	-0.21059		CAMK2A	IRS1	S629	NetworKIN	-0.399285
		CAMK2A	GIGYF1	S638	NetworKIN	-0.283595		CAMK2A	GIGYF1	S638	NetworKIN	-0.131267		CAMK2A	GIGYF1	S638	NetworKIN	0.0542857		CAMK2A	GIGYF1	S638	NetworKIN	0.00102585
		CAMK2A	ARHGEF6	S640	NetworKIN	-0.183667		CAMK2A	ARHGEF6	S640	NetworKIN	-0.0784675		CAMK2A	ARHGEF6	S640	NetworKIN	-0.108226		CAMK2A	ARHGEF6	S640	NetworKIN	-0.191139
		CAMK2A	CLASP1	S646	NetworKIN	-0.115469		CAMK2A	CLASP1	S646	NetworKIN	0.00629864		CAMK2A	CLASP1	S646	NetworKIN	-0.0776626		CAMK2A	CLASP1	S646	NetworKIN	0.0488367
		CAMK2A	ANKS1A	S647	NetworKIN	-0.467093		CAMK2A	ANKS1A	S647	NetworKIN	-0.404388		CAMK2A	ANKS1A	S647	NetworKIN	-0.320098		CAMK2A	ANKS1A	S647	NetworKIN	-0.177789
		CAMK2A	LARP4B	S649	NetworKIN	-0.798459		CAMK2A	LARP4B	S649	NetworKIN	-0.611534		CAMK2A	LARP4B	S649	NetworKIN	-0.493893		CAMK2A	LARP4B	S649	NetworKIN	-0.506746
		CAMK2A	SSH3	S649	NetworKIN	-0.6253		CAMK2A	SSH3	S649	NetworKIN	-0.132933		CAMK2A	SSH3	S649	NetworKIN	-0.0122947		CAMK2A	SSH3	S649	NetworKIN	-0.328152
		CAMK2A	AGPS	S65	NetworKIN	0.220354		CAMK2A	AGPS	S65	NetworKIN	0.413765		CAMK2A	AGPS	S65	NetworKIN	-0.0100772		CAMK2A	AGPS	S65	NetworKIN	0.481212
		CAMK2A	ATP5J	S65	NetworKIN	0.0247318		CAMK2A	ATP5J	S65	NetworKIN	0.0393811		CAMK2A	ATP5J	S65	NetworKIN	-0.0274148		CAMK2A	ATP5J	S65	NetworKIN	0.398278
		CAMK2A	PPP1R3A	S65	NetworKIN	-0.118773		CAMK2A	PPP1R3A	S65	NetworKIN	0.338162		CAMK2A	PPP1R3A	S65	NetworKIN	0.0327994		CAMK2A	PPP1R3A	S65	NetworKIN	0.226677
		CAMK2A	NUFIP2	S652	NetworKIN	0.652785		CAMK2A	NUFIP2	S652	NetworKIN	0.0457406		CAMK2A	NUFIP2	S652	NetworKIN	0.574526		CAMK2A	NUFIP2	S652	NetworKIN	0.422129
		CAMK2A	UIMC1	S653	NetworKIN	0.17362		CAMK2A	UIMC1	S653	NetworKIN	0.0993889		CAMK2A	UIMC1	S653	NetworKIN	0.470415		CAMK2A	UIMC1	S653	NetworKIN	0.142285
		CAMK2A	C18orf25	S66	NetworKIN	-0.159006		CAMK2A	C18orf25	S66	NetworKIN	0.397186		CAMK2A	C18orf25	S66	NetworKIN	-0.193583		CAMK2A	C18orf25	S66	NetworKIN	0.035715
		CAMK2A	PNN	S66	NetworKIN	0.144164		CAMK2A	PNN	S66	NetworKIN	0.301284		CAMK2A	PNN	S66	NetworKIN	-0.400171		CAMK2A	PNN	S66	NetworKIN	-0.0497723
		CAMK2A	CNNM4	S664	NetworKIN	0.115457		CAMK2A	CNNM4	S664	NetworKIN	-0.108011		CAMK2A	CNNM4	S664	NetworKIN	0.0693751		CAMK2A	CNNM4	S664	NetworKIN	-0.141718
		CAMK2A	KCTD3	S664	NetworKIN	-0.107399		CAMK2A	KCTD3	S664	NetworKIN	-0.327793		CAMK2A	KCTD3	S664	NetworKIN	-0.0485818		CAMK2A	KCTD3	S664	NetworKIN	-0.0594606
		CAMK2A	UHRF2	S667	NetworKIN	-0.00398397		CAMK2A	UHRF2	S667	NetworKIN	-0.0821523		CAMK2A	UHRF2	S667	NetworKIN	-0.0860787		CAMK2A	UHRF2	S667	NetworKIN	-0.00215159
		CAMK2A	TBC1D4	S673	NetworKIN	0.314735		CAMK2A	TBC1D4	S673	NetworKIN	-0.20516		CAMK2A	TBC1D4	S673	NetworKIN	-0.0712016		CAMK2A	TBC1D4	S673	NetworKIN	0.00340674
		CAMK2A	TNIK	S678	NetworKIN	-0.101508		CAMK2A	TNIK	S678	NetworKIN	-0.0641024		CAMK2A	TNIK	S678	NetworKIN	-0.208957		CAMK2A	TNIK	S678	NetworKIN	0.261031
		CAMK2A	RPN1	S68	NetworKIN	-0.0683626		CAMK2A	RPN1	S68	NetworKIN	0.0436422		CAMK2A	RPN1	S68	NetworKIN	-0.116476		CAMK2A	RPN1	S68	NetworKIN	0.0746652
		CAMK2A	SHE	S69	NetworKIN	-0.166905		CAMK2A	SHE	S69	NetworKIN	0.0628829		CAMK2A	SHE	S69	NetworKIN	-0.290555		CAMK2A	SHE	S69	NetworKIN	-0.0888611
		CAMK2A	STXBP5	S692	NetworKIN	-0.447458		CAMK2A	STXBP5	S692	NetworKIN	-0.274547		CAMK2A	STXBP5	S692	NetworKIN	-0.168284		CAMK2A	STXBP5	S692	NetworKIN	-0.512143
		CAMK2A	PRKCQ	S695	NetworKIN	-0.047501		CAMK2A	PRKCQ	S695	NetworKIN	0.0532247		CAMK2A	PRKCQ	S695	NetworKIN	-0.214765		CAMK2A	PRKCQ	S695	NetworKIN	-0.0174269
		CAMK2A	PHKB	S701	NetworKIN	0.306184		CAMK2A	PHKB	S701	NetworKIN	0.240428		CAMK2A	PHKB	S701	NetworKIN	0.447025		CAMK2A	PHKB	S701	NetworKIN	0.406381
		CAMK2A	SRRM1	S705	NetworKIN	-0.0589607		CAMK2A	SRRM1	S705	NetworKIN	-0.191015		CAMK2A	SRRM1	S705	NetworKIN	-0.232314		CAMK2A	SRRM1	S705	NetworKIN	-0.118515
		CAMK2A	TRAPPC10	S708	NetworKIN	-0.147888		CAMK2A	TRAPPC10	S708	NetworKIN	0.243856		CAMK2A	TRAPPC10	S708	NetworKIN	-0.0685828		CAMK2A	TRAPPC10	S708	NetworKIN	-0.368762
		CAMK2A	GOLGA4	S71	NetworKIN	0.202841		CAMK2A	GOLGA4	S71	NetworKIN	-0.214487		CAMK2A	GOLGA4	S71	NetworKIN	0.0440482		CAMK2A	GOLGA4	S71	NetworKIN	-0.219865
		CAMK2A	RAB7A	S72	NetworKIN	-0.384436		CAMK2A	RAB7A	S72	NetworKIN	0.0032504		CAMK2A	RAB7A	S72	NetworKIN	-0.195242		CAMK2A	RAB7A	S72	NetworKIN	-0.272568
		CAMK2A	VIM	S72	NetworKIN	-0.307155		CAMK2A	VIM	S72	NetworKIN	0.813534		CAMK2A	VIM	S72	NetworKIN	-0.0500475		CAMK2A	VIM	S72	NetworKIN	0.0645337
		CAMK2A	IWS1	S720	NetworKIN	0.523869		CAMK2A	IWS1	S720	NetworKIN	0.182242		CAMK2A	IWS1	S720	NetworKIN	0.127818		CAMK2A	IWS1	S720	NetworKIN	0.0646747
		CAMK2A	RPTOR	S721	NetworKIN	-0.521653		CAMK2A	RPTOR	S721	NetworKIN	-0.0689629		CAMK2A	RPTOR	S721	NetworKIN	-0.119684		CAMK2A	RPTOR	S721	NetworKIN	-0.0176513
		CAMK2A	RASGRF2	S726	NetworKIN	0.0225368		CAMK2A	RASGRF2	S726	NetworKIN	-0.0806135		CAMK2A	RASGRF2	S726	NetworKIN	-0.0446164		CAMK2A	RASGRF2	S726	NetworKIN	-0.0390569
		CAMK2A	MYO18A	S728	NetworKIN	-0.193396		CAMK2A	MYO18A	S728	NetworKIN	-0.219955		CAMK2A	MYO18A	S728	NetworKIN	-2.16559		CAMK2A	MYO18A	S728	NetworKIN	-2.14983
		CAMK2A	SPAG9	S730	NetworKIN	0.0570397		CAMK2A	SPAG9	S730	NetworKIN	0.270612		CAMK2A	SPAG9	S730	NetworKIN	-0.357926		CAMK2A	SPAG9	S730	NetworKIN	0.0865167
		CAMK2A	PPP1R3D	S74	NetworKIN	-0.486749		CAMK2A	PPP1R3D	S74	NetworKIN	-0.0337943		CAMK2A	PPP1R3D	S74	NetworKIN	-0.0988894		CAMK2A	PPP1R3D	S74	NetworKIN	-0.0645387
		CAMK2A	RASGRF2	S746	NetworKIN	0.0754875		CAMK2A	RASGRF2	S746	NetworKIN	0.0891536		CAMK2A	RASGRF2	S746	NetworKIN	-0.184325		CAMK2A	RASGRF2	S746	NetworKIN	0.206212
		CAMK2A	WRNIP1	S75	NetworKIN	-0.0183054		CAMK2A	WRNIP1	S75	NetworKIN	0.0525185		CAMK2A	WRNIP1	S75	NetworKIN	-0.0174684		CAMK2A	WRNIP1	S75	NetworKIN	-0.0209789
		CAMK2A	SYNRG	S752	NetworKIN	-0.0218493		CAMK2A	SYNRG	S752	NetworKIN	0.0592719		CAMK2A	SYNRG	S752	NetworKIN	-0.161543		CAMK2A	SYNRG	S752	NetworKIN	0.0356531
		CAMK2A	ZC3H11A	S758	NetworKIN	-0.27822		CAMK2A	ZC3H11A	S758	NetworKIN	-0.169174		CAMK2A	ZC3H11A	S758	NetworKIN	-0.234369		CAMK2A	ZC3H11A	S758	NetworKIN	-0.335005
		CAMK2A	MYPN	S759	NetworKIN	-0.117279		CAMK2A	MYPN	S759	NetworKIN	0.115428		CAMK2A	MYPN	S759	NetworKIN	-0.396538		CAMK2A	MYPN	S759	NetworKIN	-0.188604
		CAMK2A	PDCD4	S76	NetworKIN	0.108664		CAMK2A	PDCD4	S76	NetworKIN	0.0113339		CAMK2A	PDCD4	S76	NetworKIN	0.0470858		CAMK2A	PDCD4	S76	NetworKIN	0.24811
		CAMK2A	TNIK	S764	NetworKIN	-0.111419		CAMK2A	TNIK	S764	NetworKIN	-0.0447882		CAMK2A	TNIK	S764	NetworKIN	-0.12792		CAMK2A	TNIK	S764	NetworKIN	-0.0452962
		CAMK2A	NES	S768	NetworKIN	-0.564123		CAMK2A	NES	S768	NetworKIN	-0.202742		CAMK2A	NES	S768	NetworKIN	-0.379053		CAMK2A	NES	S768	NetworKIN	-0.468756
		CAMK2A	TRIP12	S77	NetworKIN	-0.221267		CAMK2A	TRIP12	S77	NetworKIN	0.0207228		CAMK2A	TRIP12	S77	NetworKIN	0.184991		CAMK2A	TRIP12	S77	NetworKIN	0.0244172
		CAMK2A	VCP	S775	NetworKIN	-0.710696		CAMK2A	VCP	S775	NetworKIN	-0.134878		CAMK2A	VCP	S775	NetworKIN	-0.484725		CAMK2A	VCP	S775	NetworKIN	-0.601747
		CAMK2A	TNS3	S776	NetworKIN	-0.117433		CAMK2A	TNS3	S776	NetworKIN	-0.007229		CAMK2A	TNS3	S776	NetworKIN	-0.173391		CAMK2A	TNS3	S776	NetworKIN	0.0551952
		CAMK2A	IL6ST	S782	NetworKIN	0.141011		CAMK2A	IL6ST	S782	NetworKIN	0.360575		CAMK2A	IL6ST	S782	NetworKIN	-0.0161223		CAMK2A	IL6ST	S782	NetworKIN	0.317252
		CAMK2A	PARP1	S782	NetworKIN	0.55616		CAMK2A	PARP1	S782	NetworKIN	0.296943		CAMK2A	PARP1	S782	NetworKIN	0.365682		CAMK2A	PARP1	S782	NetworKIN	0.210788
		CAMK2A	PLIN1	S81	NetworKIN	0.00310025		CAMK2A	PLIN1	S81	NetworKIN	-0.00426976		CAMK2A	PLIN1	S81	NetworKIN	0.145584		CAMK2A	PLIN1	S81	NetworKIN	0.320153
		CAMK2A	HSPB1	S82	NetworKIN	0.189405		CAMK2A	HSPB1	S82	NetworKIN	0.769092		CAMK2A	HSPB1	S82	NetworKIN	-0.292281		CAMK2A	HSPB1	S82	NetworKIN	0.756969
		CAMK2A	PHKG1	S82	NetworKIN	0.0268209		CAMK2A	PHKG1	S82	NetworKIN	0.0662688		CAMK2A	PHKG1	S82	NetworKIN	-0.0895289		CAMK2A	PHKG1	S82	NetworKIN	-0.0279684
		CAMK2A	ZNRF2	S82	NetworKIN	-0.529838		CAMK2A	ZNRF2	S82	NetworKIN	-0.093072		CAMK2A	ZNRF2	S82	NetworKIN	-0.121704		CAMK2A	ZNRF2	S82	NetworKIN	-0.325557
		CAMK2A	ARHGAP6	S820	NetworKIN	-0.2142		CAMK2A	ARHGAP6	S820	NetworKIN	0.27078		CAMK2A	ARHGAP6	S820	NetworKIN	-0.192917		CAMK2A	ARHGAP6	S820	NetworKIN	-0.00535723
		CAMK2A	ACIN1	S825	NetworKIN	-0.670558		CAMK2A	ACIN1	S825	NetworKIN	0.00826548		CAMK2A	ACIN1	S825	NetworKIN	-0.257889		CAMK2A	ACIN1	S825	NetworKIN	-0.229046
		CAMK2A	CWC22	S829	NetworKIN	-0.189561		CAMK2A	CWC22	S829	NetworKIN	-0.158833		CAMK2A	CWC22	S829	NetworKIN	-0.209018		CAMK2A	CWC22	S829	NetworKIN	-0.1963
		CAMK2A	GAPDH	S83	NetworKIN	-0.0492678		CAMK2A	GAPDH	S83	NetworKIN	-0.0640536		CAMK2A	GAPDH	S83	NetworKIN	0.0217917		CAMK2A	GAPDH	S83	NetworKIN	-0.00214243
		CAMK2A	MAP2	S833	NetworKIN	-0.142491		CAMK2A	MAP2	S833	NetworKIN	-0.20687		CAMK2A	MAP2	S833	NetworKIN	-0.138067		CAMK2A	MAP2	S833	NetworKIN	-0.00156033
		CAMK2A	ADAM22	S834	NetworKIN	-0.293226		CAMK2A	ADAM22	S834	NetworKIN	0.195342		CAMK2A	ADAM22	S834	NetworKIN	-0.270247		CAMK2A	ADAM22	S834	NetworKIN	-0.0731978
		CAMK2A	CEP170	S838	NetworKIN	-0.289839		CAMK2A	CEP170	S838	NetworKIN	-0.322295		CAMK2A	CEP170	S838	NetworKIN	-0.221381		CAMK2A	CEP170	S838	NetworKIN	-0.364603
		CAMK2A	CTDP1	S839	NetworKIN	-0.0925096		CAMK2A	CTDP1	S839	NetworKIN	-0.100245		CAMK2A	CTDP1	S839	NetworKIN	-0.179598		CAMK2A	CTDP1	S839	NetworKIN	0.0258469
		CAMK2A	HNRNPA0	S84	NetworKIN	2.51542		CAMK2A	HNRNPA0	S84	NetworKIN	2.55296		CAMK2A	HNRNPA0	S84	NetworKIN	0.431552		CAMK2A	HNRNPA0	S84	NetworKIN	1.86993
		CAMK2A	NCK1	S85	NetworKIN	-0.180263		CAMK2A	NCK1	S85	NetworKIN	-0.0940062		CAMK2A	NCK1	S85	NetworKIN	-0.296493		CAMK2A	NCK1	S85	NetworKIN	-0.089135
		CAMK2A	NOS1	S852	NetworKIN	0.986083		CAMK2A	NOS1	S852	NetworKIN	0.638822		CAMK2A	NOS1	S852	NetworKIN	-0.277288		CAMK2A	NOS1	S852	NetworKIN	-0.042151
		CAMK2A	LIPE	S855	NetworKIN	0.403899		CAMK2A	LIPE	S855	NetworKIN	0.0637979		CAMK2A	LIPE	S855	NetworKIN	0.0165802		CAMK2A	LIPE	S855	NetworKIN	0.413324
		CAMK2A	CLEC16A	S863	NetworKIN	-0.558243		CAMK2A	CLEC16A	S863	NetworKIN	-0.584027		CAMK2A	CLEC16A	S863	NetworKIN	-0.411125		CAMK2A	CLEC16A	S863	NetworKIN	0.433854
		CAMK2A	EMD	S87	NetworKIN	-0.296071		CAMK2A	EMD	S87	NetworKIN	-0.0761982		CAMK2A	EMD	S87	NetworKIN	-0.1679		CAMK2A	EMD	S87	NetworKIN	-0.0316912
		CAMK2A	EPB41L2	S87	NetworKIN	-0.0351282		CAMK2A	EPB41L2	S87	NetworKIN	-0.224005		CAMK2A	EPB41L2	S87	NetworKIN	0.0881305		CAMK2A	EPB41L2	S87	NetworKIN	0.0964898
		CAMK2A	SLAIN2	S87	NetworKIN	-0.233084		CAMK2A	SLAIN2	S87	NetworKIN	-0.0944838		CAMK2A	SLAIN2	S87	NetworKIN	-0.0331155		CAMK2A	SLAIN2	S87	NetworKIN	0.0775059
		CAMK2A	DOCK6	S872	NetworKIN	-0.0413913		CAMK2A	DOCK6	S872	NetworKIN	-0.0448661		CAMK2A	DOCK6	S872	NetworKIN	-0.245612		CAMK2A	DOCK6	S872	NetworKIN	0.0795636
		CAMK2A	DOCK6	S880	NetworKIN	-0.177305		CAMK2A	DOCK6	S880	NetworKIN	0.0182666		CAMK2A	DOCK6	S880	NetworKIN	-0.332445		CAMK2A	DOCK6	S880	NetworKIN	0.134771
		CAMK2A	ANKS1A	S887	NetworKIN	0.108723		CAMK2A	ANKS1A	S887	NetworKIN	-0.0998673		CAMK2A	ANKS1A	S887	NetworKIN	0.0455288		CAMK2A	ANKS1A	S887	NetworKIN	-0.00344821
		CAMK2A	GOLGA4	S89	NetworKIN	0.410126		CAMK2A	GOLGA4	S89	NetworKIN	-0.155969		CAMK2A	GOLGA4	S89	NetworKIN	-0.12151		CAMK2A	GOLGA4	S89	NetworKIN	0.102175
		CAMK2A	SASH1	S90	NetworKIN	-0.217079		CAMK2A	SASH1	S90	NetworKIN	-0.287244		CAMK2A	SASH1	S90	NetworKIN	-0.27394		CAMK2A	SASH1	S90	NetworKIN	-0.185273
		CAMK2A	ABCC1	S915	NetworKIN	-0.0776109		CAMK2A	ABCC1	S915	NetworKIN	-0.136401		CAMK2A	ABCC1	S915	NetworKIN	0.148225		CAMK2A	ABCC1	S915	NetworKIN	-0.0895318
		CAMK2A	ZFP36L1	S92	NetworKIN	0.178247		CAMK2A	ZFP36L1	S92	NetworKIN	0.227916		CAMK2A	ZFP36L1	S92	NetworKIN	0.564173		CAMK2A	ZFP36L1	S92	NetworKIN	0.529919
		CAMK2A	TSC2	S939	NetworKIN	-0.105677		CAMK2A	TSC2	S939	NetworKIN	-0.308654		CAMK2A	TSC2	S939	NetworKIN	-0.0952403		CAMK2A	TSC2	S939	NetworKIN	-0.149827
		CAMK2A	CTR9	S941	NetworKIN	0.108482		CAMK2A	CTR9	S941	NetworKIN	-0.0681743		CAMK2A	CTR9	S941	NetworKIN	0.0128636		CAMK2A	CTR9	S941	NetworKIN	-0.146093
		CAMK2A	RGS3	S943	NetworKIN	-0.129866		CAMK2A	RGS3	S943	NetworKIN	-0.0242962		CAMK2A	RGS3	S943	NetworKIN	-0.0481876		CAMK2A	RGS3	S943	NetworKIN	0.0297648
		CAMK2A	ARHGAP29	S949	NetworKIN	0.039524		CAMK2A	ARHGAP29	S949	NetworKIN	0.0405027		CAMK2A	ARHGAP29	S949	NetworKIN	-0.17595		CAMK2A	ARHGAP29	S949	NetworKIN	0.028273
		CAMK2A	SRRM2	S952	NetworKIN	-0.629037		CAMK2A	SRRM2	S952	NetworKIN	-0.262745		CAMK2A	SRRM2	S952	NetworKIN	-0.428263		CAMK2A	SRRM2	S952	NetworKIN	-0.515261
		CAMK2A	MBP	S96	NetworKIN	0.0993478		CAMK2A	MBP	S96	NetworKIN	-0.171874		CAMK2A	MBP	S96	NetworKIN	0.549343		CAMK2A	MBP	S96	NetworKIN	0.435355
		CAMK2A	MVD	S96	NetworKIN	-0.00270398		CAMK2A	MVD	S96	NetworKIN	-0.0531198		CAMK2A	MVD	S96	NetworKIN	-0.0719619		CAMK2A	MVD	S96	NetworKIN	-0.0811848
		CAMK2A	PNN	S96	NetworKIN	-0.18165		CAMK2A	PNN	S96	NetworKIN	0.0752395		CAMK2A	PNN	S96	NetworKIN	-0.211324		CAMK2A	PNN	S96	NetworKIN	-0.194465
		CAMK2A	LBR	S99	NetworKIN	-0.321999		CAMK2A	LBR	S99	NetworKIN	-0.0755339		CAMK2A	LBR	S99	NetworKIN	-0.341721		CAMK2A	LBR	S99	NetworKIN	-0.0764699
		CAMK2A	PRKAR2A	S99	NetworKIN	0.364506		CAMK2A	PRKAR2A	S99	NetworKIN	0.154254		CAMK2A	PRKAR2A	S99	NetworKIN	0.0751869		CAMK2A	PRKAR2A	S99	NetworKIN	0.236818
		CAMK2A	ANKRD27	T1023	NetworKIN	-0.0716889		CAMK2A	ANKRD27	T1023	NetworKIN	0.189858		CAMK2A	ANKRD27	T1023	NetworKIN	-0.0425245		CAMK2A	ANKRD27	T1023	NetworKIN	0.108617
		CAMK2A	GOT2	T128	NetworKIN	0.0788486		CAMK2A	GOT2	T128	NetworKIN	0.394942		CAMK2A	GOT2	T128	NetworKIN	-0.277559		CAMK2A	GOT2	T128	NetworKIN	0.204183
		CAMK2A	GBF1	T1317	NetworKIN	-0.0588784		CAMK2A	GBF1	T1317	NetworKIN	-0.111111		CAMK2A	GBF1	T1317	NetworKIN	-0.0845181		CAMK2A	GBF1	T1317	NetworKIN	0.239775
		CAMK2A	PSMG1	T18	NetworKIN	-0.415513		CAMK2A	PSMG1	T18	NetworKIN	-0.102082		CAMK2A	PSMG1	T18	NetworKIN	-0.358787		CAMK2A	PSMG1	T18	NetworKIN	-0.432131
		CAMK2A	PRKACA	T198	NetworKIN	-0.302943		CAMK2A	PRKACA	T198	NetworKIN	-0.10909		CAMK2A	PRKACA	T198	NetworKIN	0.202844		CAMK2A	PRKACA	T198	NetworKIN	0.223321
		CAMK2A	FLNA	T2336	NetworKIN	0.0676632		CAMK2A	FLNA	T2336	NetworKIN	0.543976		CAMK2A	FLNA	T2336	NetworKIN	-0.0431227		CAMK2A	FLNA	T2336	NetworKIN	-0.0215791
		CAMK2A	FLNC	T2412	NetworKIN	-0.642512		CAMK2A	FLNC	T2412	NetworKIN	0.932104		CAMK2A	FLNC	T2412	NetworKIN	-0.541059		CAMK2A	FLNC	T2412	NetworKIN	-0.199278
		CAMK2A	TPM2	T252	NetworKIN	-0.0356034		CAMK2A	TPM2	T252	NetworKIN	-0.11583		CAMK2A	TPM2	T252	NetworKIN	0.202657		CAMK2A	TPM2	T252	NetworKIN	0.129942
		CAMK2A	CAMK2B	T287	NetworKIN	-0.31635		CAMK2A	CAMK2B	T287	NetworKIN	0.0106846		CAMK2A	CAMK2B	T287	NetworKIN	-0.676513		CAMK2A	CAMK2B	T287	NetworKIN	-0.221161
		CAMK2A	CAMK2D	T287	NetworKIN	-0.568473		CAMK2A	CAMK2D	T287	NetworKIN	-0.139768		CAMK2A	CAMK2D	T287	NetworKIN	-0.77708		CAMK2A	CAMK2D	T287	NetworKIN	-0.354361
		CAMK2A	NDRG1	T328	NetworKIN	0.371579		CAMK2A	NDRG1	T328	NetworKIN	0.476314		CAMK2A	NDRG1	T328	NetworKIN	0.288658		CAMK2A	NDRG1	T328	NetworKIN	0.432648
		CAMK2A	CWC15	T47	NetworKIN	-0.470496		CAMK2A	CWC15	T47	NetworKIN	0.0824375		CAMK2A	CWC15	T47	NetworKIN	-0.421346		CAMK2A	CWC15	T47	NetworKIN	-0.459938
		CAMK2A	CACNB1	T499	NetworKIN	-0.280253		CAMK2A	CACNB1	T499	NetworKIN	-0.177474		CAMK2A	CACNB1	T499	NetworKIN	-0.140929		CAMK2A	CACNB1	T499	NetworKIN	-0.34511
		CAMK2A	PRKCD	T507	NetworKIN	0.191672		CAMK2A	PRKCD	T507	NetworKIN	0.938173		CAMK2A	PRKCD	T507	NetworKIN	0.260866		CAMK2A	PRKCD	T507	NetworKIN	0.574973
		CAMK2A	PSMG1	T54	NetworKIN	-0.188505		CAMK2A	PSMG1	T54	NetworKIN	0.324327		CAMK2A	PSMG1	T54	NetworKIN	-0.139024		CAMK2A	PSMG1	T54	NetworKIN	0.164456
		CAMK2A	EIF3A	T574	NetworKIN	0.0422736		CAMK2A	EIF3A	T574	NetworKIN	1.54576		CAMK2A	EIF3A	T574	NetworKIN	-0.0986285		CAMK2A	EIF3A	T574	NetworKIN	0.376884
		CAMK2A	TBC1D1	T596	NetworKIN	0.136908		CAMK2A	TBC1D1	T596	NetworKIN	0.0275381		CAMK2A	TBC1D1	T596	NetworKIN	-0.331361		CAMK2A	TBC1D1	T596	NetworKIN	0.495324
		CAMK2A	TBC1D4	T642	NetworKIN	-0.0731599		CAMK2A	TBC1D4	T642	NetworKIN	-0.211306		CAMK2A	TBC1D4	T642	NetworKIN	-0.243452		CAMK2A	TBC1D4	T642	NetworKIN	-0.0190723
		CAMK2A	CTNNA1	T654	NetworKIN	-0.314979		CAMK2A	CTNNA1	T654	NetworKIN	-0.126419		CAMK2A	CTNNA1	T654	NetworKIN	-0.343197		CAMK2A	CTNNA1	T654	NetworKIN	-0.152785
		CAMK2A	RALGAPA2	T715	NetworKIN	0.0906836		CAMK2A	RALGAPA2	T715	NetworKIN	-0.0453625		CAMK2A	RALGAPA2	T715	NetworKIN	-0.0761146		CAMK2A	RALGAPA2	T715	NetworKIN	0.0313821
		CAMK2B	ACTN4	S159	NetworKIN	0.0269188		CAMK2B	ACTN4	S159	NetworKIN	0.0182804		CAMK2B	ACTN4	S159	NetworKIN	-0.0361802		CAMK2B	ACTN4	S159	NetworKIN	-0.0945034
		CAMK2B	RRAD	S273	NetworKIN	0.241494		CAMK2B	RRAD	S273	NetworKIN	0.784128		CAMK2B	RRAD	S273	NetworKIN	0.705485		CAMK2B	RRAD	S273	NetworKIN	0.974401
		CAMK2B	CAMK2B	S280	NetworKIN	0.0336311		CAMK2B	CAMK2B	S280	NetworKIN	0.631659		CAMK2B	CAMK2B	S280	NetworKIN	0.222402		CAMK2B	CAMK2B	S280	NetworKIN	0.390268
		CAMK2B	MAPK1	S284	NetworKIN	0.18042		CAMK2B	MAPK1	S284	NetworKIN	0.0671496		CAMK2B	MAPK1	S284	NetworKIN	0.371742		CAMK2B	MAPK1	S284	NetworKIN	0.144199
		CAMK2B	RYR1	S2843	NetworKIN	-0.260699		CAMK2B	RYR1	S2843	NetworKIN	-0.0532516		CAMK2B	RYR1	S2843	NetworKIN	0.141494		CAMK2B	RYR1	S2843	NetworKIN	-0.165512
		CAMK2B	VIM	S325	NetworKIN	-0.00644799		CAMK2B	VIM	S325	NetworKIN	0.0296908		CAMK2B	VIM	S325	NetworKIN	-0.402929		CAMK2B	VIM	S325	NetworKIN	0.0620104
		CAMK2B	CAMK2D	S330	NetworKIN	-0.179459		CAMK2B	CAMK2D	S330	NetworKIN	0.0844686		CAMK2B	CAMK2D	S330	NetworKIN	-0.318428		CAMK2B	CAMK2D	S330	NetworKIN	-0.0745757
		CAMK2B	DMD	S3623	NetworKIN	0.108027		CAMK2B	DMD	S3623	NetworKIN	-0.0922962		CAMK2B	DMD	S3623	NetworKIN	-0.0283603		CAMK2B	DMD	S3623	NetworKIN	0.0746526
		CAMK2B	CAMK2B	S367	NetworKIN	0.87854		CAMK2B	CAMK2B	S367	NetworKIN	0.918069		CAMK2B	CAMK2B	S367	NetworKIN	0.12342		CAMK2B	CAMK2B	S367	NetworKIN	1.88622
		CAMK2B	VIM	S39	NetworKIN	-0.298372		CAMK2B	VIM	S39	NetworKIN	-0.109572		CAMK2B	VIM	S39	NetworKIN	-0.214707		CAMK2B	VIM	S39	NetworKIN	-0.234692
		CAMK2B	CAMK2B	S394	NetworKIN	-0.583267		CAMK2B	CAMK2B	S394	NetworKIN	-0.350537		CAMK2B	CAMK2B	S394	NetworKIN	-0.786503		CAMK2B	CAMK2B	S394	NetworKIN	-0.62616
		CAMK2B	CAMK2B	S397	NetworKIN	0.0458861		CAMK2B	CAMK2B	S397	NetworKIN	-0.0651567		CAMK2B	CAMK2B	S397	NetworKIN	-0.0535214		CAMK2B	CAMK2B	S397	NetworKIN	-0.414087
		CAMK2B	VIM	S409	NetworKIN	0.0262753		CAMK2B	VIM	S409	NetworKIN	-0.0602087		CAMK2B	VIM	S409	NetworKIN	-0.120252		CAMK2B	VIM	S409	NetworKIN	-0.0790235
		CAMK2B	EPB41L1	S466	NetworKIN	-0.384621		CAMK2B	EPB41L1	S466	NetworKIN	-0.41722		CAMK2B	EPB41L1	S466	NetworKIN	-0.102427		CAMK2B	EPB41L1	S466	NetworKIN	-0.112614
		CAMK2B	HDAC4	S467	NetworKIN	-0.144354		CAMK2B	HDAC4	S467	NetworKIN	-0.112303		CAMK2B	HDAC4	S467	NetworKIN	-0.472938		CAMK2B	HDAC4	S467	NetworKIN	-0.159967
		CAMK2B	SLC2A4	S488	NetworKIN	0.0254061		CAMK2B	SLC2A4	S488	NetworKIN	0.271042		CAMK2B	SLC2A4	S488	NetworKIN	0.00439387		CAMK2B	SLC2A4	S488	NetworKIN	0.319456
		CAMK2B	VIM	S51	NetworKIN	0.200946		CAMK2B	VIM	S51	NetworKIN	0.182836		CAMK2B	VIM	S51	NetworKIN	0.0859934		CAMK2B	VIM	S51	NetworKIN	0.21088
		CAMK2B	EPB41L1	S510	NetworKIN	-0.0720091		CAMK2B	EPB41L1	S510	NetworKIN	0.00322509		CAMK2B	EPB41L1	S510	NetworKIN	-0.0926616		CAMK2B	EPB41L1	S510	NetworKIN	0.0765045
		CAMK2B	HDAC4	S632	NetworKIN	-0.198077		CAMK2B	HDAC4	S632	NetworKIN	-0.14394		CAMK2B	HDAC4	S632	NetworKIN	-0.239028		CAMK2B	HDAC4	S632	NetworKIN	0.00702293
		CAMK2B	VIM	S72	NetworKIN	-0.307155		CAMK2B	VIM	S72	NetworKIN	0.813534		CAMK2B	VIM	S72	NetworKIN	-0.0500475		CAMK2B	VIM	S72	NetworKIN	0.0645337
		CAMK2B	RASGRF2	S726	NetworKIN	0.0225368		CAMK2B	RASGRF2	S726	NetworKIN	-0.0806135		CAMK2B	RASGRF2	S726	NetworKIN	-0.0446164		CAMK2B	RASGRF2	S726	NetworKIN	-0.0390569
		CAMK2B	RASGRF2	S746	NetworKIN	0.0754875		CAMK2B	RASGRF2	S746	NetworKIN	0.0891536		CAMK2B	RASGRF2	S746	NetworKIN	-0.184325		CAMK2B	RASGRF2	S746	NetworKIN	0.206212
		CAMK2B	EPB41L1	S782	NetworKIN	-0.252614		CAMK2B	EPB41L1	S782	NetworKIN	0.0230322		CAMK2B	EPB41L1	S782	NetworKIN	0.0549299		CAMK2B	EPB41L1	S782	NetworKIN	0.165271
		CAMK2B	EPB41L1	S784	NetworKIN	-0.276843		CAMK2B	EPB41L1	S784	NetworKIN	-0.192442		CAMK2B	EPB41L1	S784	NetworKIN	-0.457051		CAMK2B	EPB41L1	S784	NetworKIN	0.1471
		CAMK2B	SLC9A1	S796	NetworKIN	-0.406601		CAMK2B	SLC9A1	S796	NetworKIN	-0.39316		CAMK2B	SLC9A1	S796	NetworKIN	-0.67463		CAMK2B	SLC9A1	S796	NetworKIN	-0.725705
		CAMK2B	GAPDH	S83	NetworKIN	-0.0492678		CAMK2B	GAPDH	S83	NetworKIN	-0.0640536		CAMK2B	GAPDH	S83	NetworKIN	0.0217917		CAMK2B	GAPDH	S83	NetworKIN	-0.00214243
		CAMK2B	MAP2	S833	NetworKIN	-0.142491		CAMK2B	MAP2	S833	NetworKIN	-0.20687		CAMK2B	MAP2	S833	NetworKIN	-0.138067		CAMK2B	MAP2	S833	NetworKIN	-0.00156033
		CAMK2B	PRKAR2A	S99	NetworKIN	0.364506		CAMK2B	PRKAR2A	S99	NetworKIN	0.154254		CAMK2B	PRKAR2A	S99	NetworKIN	0.0751869		CAMK2B	PRKAR2A	S99	NetworKIN	0.236818
		CAMK2B	CAMK2B	T287	NetworKIN	-0.31635		CAMK2B	CAMK2B	T287	NetworKIN	0.0106846		CAMK2B	CAMK2B	T287	NetworKIN	-0.676513		CAMK2B	CAMK2B	T287	NetworKIN	-0.221161
		CAMK2B	CAMK2D	T287	NetworKIN	-0.568473		CAMK2B	CAMK2D	T287	NetworKIN	-0.139768		CAMK2B	CAMK2D	T287	NetworKIN	-0.77708		CAMK2B	CAMK2D	T287	NetworKIN	-0.354361
		CAMK2B	CAMK2B	T400	NetworKIN	-0.371741		CAMK2B	CAMK2B	T400	NetworKIN	-0.098834		CAMK2B	CAMK2B	T400	NetworKIN	-0.41436		CAMK2B	CAMK2B	T400	NetworKIN	-0.532754
		CAMK2D	CKB	S178	NetworKIN	0.494887		CAMK2D	CKB	S178	NetworKIN	0.0129014		CAMK2D	CKB	S178	NetworKIN	-0.0495348		CAMK2D	CKB	S178	NetworKIN	0.405022
		CAMK2D	EIF4B	S219	NetworKIN	-0.745652		CAMK2D	EIF4B	S219	NetworKIN	-0.245216		CAMK2D	EIF4B	S219	NetworKIN	-0.601009		CAMK2D	EIF4B	S219	NetworKIN	-0.453556
		CAMK2D	RRAD	S273	NetworKIN	0.241494		CAMK2D	RRAD	S273	NetworKIN	0.784128		CAMK2D	RRAD	S273	NetworKIN	0.705485		CAMK2D	RRAD	S273	NetworKIN	0.974401
		CAMK2D	CAMK2B	S280	NetworKIN	0.0336311		CAMK2D	CAMK2B	S280	NetworKIN	0.631659		CAMK2D	CAMK2B	S280	NetworKIN	0.222402		CAMK2D	CAMK2B	S280	NetworKIN	0.390268
		CAMK2D	MAPK1	S284	NetworKIN	0.18042		CAMK2D	MAPK1	S284	NetworKIN	0.0671496		CAMK2D	MAPK1	S284	NetworKIN	0.371742		CAMK2D	MAPK1	S284	NetworKIN	0.144199
		CAMK2D	RYR1	S2843	NetworKIN	-0.260699		CAMK2D	RYR1	S2843	NetworKIN	-0.0532516		CAMK2D	RYR1	S2843	NetworKIN	0.141494		CAMK2D	RYR1	S2843	NetworKIN	-0.165512
		CAMK2D	CKB	S285	NetworKIN	-0.351183		CAMK2D	CKB	S285	NetworKIN	-0.136719		CAMK2D	CKB	S285	NetworKIN	-0.645629		CAMK2D	CKB	S285	NetworKIN	-0.00400393
		CAMK2D	VIM	S325	NetworKIN	-0.00644799		CAMK2D	VIM	S325	NetworKIN	0.0296908		CAMK2D	VIM	S325	NetworKIN	-0.402929		CAMK2D	VIM	S325	NetworKIN	0.0620104
		CAMK2D	CAMK2D	S330	NetworKIN	-0.179459		CAMK2D	CAMK2D	S330	NetworKIN	0.0844686		CAMK2D	CAMK2D	S330	NetworKIN	-0.318428		CAMK2D	CAMK2D	S330	NetworKIN	-0.0745757
		CAMK2D	CAMK2D	S333	NetworKIN	-0.137635		CAMK2D	CAMK2D	S333	NetworKIN	0.211022		CAMK2D	CAMK2D	S333	NetworKIN	-0.328143		CAMK2D	CAMK2D	S333	NetworKIN	0.0236544
		CAMK2D	EIF4B	S359	NetworKIN	-0.161233		CAMK2D	EIF4B	S359	NetworKIN	-0.118512		CAMK2D	EIF4B	S359	NetworKIN	0.164925		CAMK2D	EIF4B	S359	NetworKIN	-0.068454
		CAMK2D	DMD	S3623	NetworKIN	0.108027		CAMK2D	DMD	S3623	NetworKIN	-0.0922962		CAMK2D	DMD	S3623	NetworKIN	-0.0283603		CAMK2D	DMD	S3623	NetworKIN	0.0746526
		CAMK2D	VIM	S39	NetworKIN	-0.298372		CAMK2D	VIM	S39	NetworKIN	-0.109572		CAMK2D	VIM	S39	NetworKIN	-0.214707		CAMK2D	VIM	S39	NetworKIN	-0.234692
		CAMK2D	CAMK2B	S394	NetworKIN	-0.583267		CAMK2D	CAMK2B	S394	NetworKIN	-0.350537		CAMK2D	CAMK2B	S394	NetworKIN	-0.786503		CAMK2D	CAMK2B	S394	NetworKIN	-0.62616
		CAMK2D	EIF4B	S406	NetworKIN	0.200993		CAMK2D	EIF4B	S406	NetworKIN	0.181979		CAMK2D	EIF4B	S406	NetworKIN	0.265629		CAMK2D	EIF4B	S406	NetworKIN	0.122314
		CAMK2D	VIM	S409	NetworKIN	0.0262753		CAMK2D	VIM	S409	NetworKIN	-0.0602087		CAMK2D	VIM	S409	NetworKIN	-0.120252		CAMK2D	VIM	S409	NetworKIN	-0.0790235
		CAMK2D	EIF4B	S422	NetworKIN	0.795961		CAMK2D	EIF4B	S422	NetworKIN	1.24038		CAMK2D	EIF4B	S422	NetworKIN	0.16366		CAMK2D	EIF4B	S422	NetworKIN	0.470096
		CAMK2D	EPB41L1	S466	NetworKIN	-0.384621		CAMK2D	EPB41L1	S466	NetworKIN	-0.41722		CAMK2D	EPB41L1	S466	NetworKIN	-0.102427		CAMK2D	EPB41L1	S466	NetworKIN	-0.112614
		CAMK2D	HDAC4	S467	NetworKIN	-0.144354		CAMK2D	HDAC4	S467	NetworKIN	-0.112303		CAMK2D	HDAC4	S467	NetworKIN	-0.472938		CAMK2D	HDAC4	S467	NetworKIN	-0.159967
		CAMK2D	CAMK2D	S472	NetworKIN	-0.417199		CAMK2D	CAMK2D	S472	NetworKIN	-0.303906		CAMK2D	CAMK2D	S472	NetworKIN	-0.498143		CAMK2D	CAMK2D	S472	NetworKIN	-0.0611179
		CAMK2D	CAMK2D	S490	NetworKIN	-0.153031		CAMK2D	CAMK2D	S490	NetworKIN	0.169317		CAMK2D	CAMK2D	S490	NetworKIN	-0.399717		CAMK2D	CAMK2D	S490	NetworKIN	-0.00865398
		CAMK2D	VIM	S51	NetworKIN	0.200946		CAMK2D	VIM	S51	NetworKIN	0.182836		CAMK2D	VIM	S51	NetworKIN	0.0859934		CAMK2D	VIM	S51	NetworKIN	0.21088
		CAMK2D	EPB41L1	S510	NetworKIN	-0.0720091		CAMK2D	EPB41L1	S510	NetworKIN	0.00322509		CAMK2D	EPB41L1	S510	NetworKIN	-0.0926616		CAMK2D	EPB41L1	S510	NetworKIN	0.0765045
		CAMK2D	HDAC4	S632	NetworKIN	-0.198077		CAMK2D	HDAC4	S632	NetworKIN	-0.14394		CAMK2D	HDAC4	S632	NetworKIN	-0.239028		CAMK2D	HDAC4	S632	NetworKIN	0.00702293
		CAMK2D	VIM	S72	NetworKIN	-0.307155		CAMK2D	VIM	S72	NetworKIN	0.813534		CAMK2D	VIM	S72	NetworKIN	-0.0500475		CAMK2D	VIM	S72	NetworKIN	0.0645337
		CAMK2D	RASGRF2	S726	NetworKIN	0.0225368		CAMK2D	RASGRF2	S726	NetworKIN	-0.0806135		CAMK2D	RASGRF2	S726	NetworKIN	-0.0446164		CAMK2D	RASGRF2	S726	NetworKIN	-0.0390569
		CAMK2D	RASGRF2	S746	NetworKIN	0.0754875		CAMK2D	RASGRF2	S746	NetworKIN	0.0891536		CAMK2D	RASGRF2	S746	NetworKIN	-0.184325		CAMK2D	RASGRF2	S746	NetworKIN	0.206212
		CAMK2D	EPB41L1	S782	NetworKIN	-0.252614		CAMK2D	EPB41L1	S782	NetworKIN	0.0230322		CAMK2D	EPB41L1	S782	NetworKIN	0.0549299		CAMK2D	EPB41L1	S782	NetworKIN	0.165271
		CAMK2D	EPB41L1	S784	NetworKIN	-0.276843		CAMK2D	EPB41L1	S784	NetworKIN	-0.192442		CAMK2D	EPB41L1	S784	NetworKIN	-0.457051		CAMK2D	EPB41L1	S784	NetworKIN	0.1471
		CAMK2D	MAP2	S833	NetworKIN	-0.142491		CAMK2D	MAP2	S833	NetworKIN	-0.20687		CAMK2D	MAP2	S833	NetworKIN	-0.138067		CAMK2D	MAP2	S833	NetworKIN	-0.00156033
		CAMK2D	CAMK2B	T287	NetworKIN	-0.31635		CAMK2D	CAMK2B	T287	NetworKIN	0.0106846		CAMK2D	CAMK2B	T287	NetworKIN	-0.676513		CAMK2D	CAMK2B	T287	NetworKIN	-0.221161
		CAMK2D	CAMK2D	T287	NetworKIN	-0.568473		CAMK2D	CAMK2D	T287	NetworKIN	-0.139768		CAMK2D	CAMK2D	T287	NetworKIN	-0.77708		CAMK2D	CAMK2D	T287	NetworKIN	-0.354361
		CAMK2D	CAMK2D	T337	NetworKIN	-0.211437		CAMK2D	CAMK2D	T337	NetworKIN	-0.00500961		CAMK2D	CAMK2D	T337	NetworKIN	-0.385476		CAMK2D	CAMK2D	T337	NetworKIN	-0.190217
		CAMK2D	CAMK2B	T400	NetworKIN	-0.371741		CAMK2D	CAMK2B	T400	NetworKIN	-0.098834		CAMK2D	CAMK2B	T400	NetworKIN	-0.41436		CAMK2D	CAMK2B	T400	NetworKIN	-0.532754
		CAMK2G	MYLK	S1438	NetworKIN	-0.0392133		CAMK2G	MYLK	S1438	NetworKIN	-0.0178113		CAMK2G	MYLK	S1438	NetworKIN	-0.0647306		CAMK2G	MYLK	S1438	NetworKIN	0.102679
		CAMK2G	ACTN4	S159	NetworKIN	0.0269188		CAMK2G	ACTN4	S159	NetworKIN	0.0182804		CAMK2G	ACTN4	S159	NetworKIN	-0.0361802		CAMK2G	ACTN4	S159	NetworKIN	-0.0945034
		CAMK2G	MYLK	S1773	NetworKIN	-0.419571		CAMK2G	MYLK	S1773	NetworKIN	-0.539676		CAMK2G	MYLK	S1773	NetworKIN	-0.319162		CAMK2G	MYLK	S1773	NetworKIN	-0.521227
		CAMK2G	FLNA	S2152	NetworKIN	0.485165		CAMK2G	FLNA	S2152	NetworKIN	0.479362		CAMK2G	FLNA	S2152	NetworKIN	0.0076573		CAMK2G	FLNA	S2152	NetworKIN	0.058782
		CAMK2G	RRAD	S273	NetworKIN	0.241494		CAMK2G	RRAD	S273	NetworKIN	0.784128		CAMK2G	RRAD	S273	NetworKIN	0.705485		CAMK2G	RRAD	S273	NetworKIN	0.974401
		CAMK2G	MAPK1	S284	NetworKIN	0.18042		CAMK2G	MAPK1	S284	NetworKIN	0.0671496		CAMK2G	MAPK1	S284	NetworKIN	0.371742		CAMK2G	MAPK1	S284	NetworKIN	0.144199
		CAMK2G	RYR1	S2843	NetworKIN	-0.260699		CAMK2G	RYR1	S2843	NetworKIN	-0.0532516		CAMK2G	RYR1	S2843	NetworKIN	0.141494		CAMK2G	RYR1	S2843	NetworKIN	-0.165512
		CAMK2G	CAMK2D	S330	NetworKIN	-0.179459		CAMK2G	CAMK2D	S330	NetworKIN	0.0844686		CAMK2G	CAMK2D	S330	NetworKIN	-0.318428		CAMK2G	CAMK2D	S330	NetworKIN	-0.0745757
		CAMK2G	DMD	S3623	NetworKIN	0.108027		CAMK2G	DMD	S3623	NetworKIN	-0.0922962		CAMK2G	DMD	S3623	NetworKIN	-0.0283603		CAMK2G	DMD	S3623	NetworKIN	0.0746526
		CAMK2G	HDAC4	S632	NetworKIN	-0.198077		CAMK2G	HDAC4	S632	NetworKIN	-0.14394		CAMK2G	HDAC4	S632	NetworKIN	-0.239028		CAMK2G	HDAC4	S632	NetworKIN	0.00702293
		CAMK2G	MAP2	S833	NetworKIN	-0.142491		CAMK2G	MAP2	S833	NetworKIN	-0.20687		CAMK2G	MAP2	S833	NetworKIN	-0.138067		CAMK2G	MAP2	S833	NetworKIN	-0.00156033
		CAMK2G	PRKAR2A	S99	NetworKIN	0.364506		CAMK2G	PRKAR2A	S99	NetworKIN	0.154254		CAMK2G	PRKAR2A	S99	NetworKIN	0.0751869		CAMK2G	PRKAR2A	S99	NetworKIN	0.236818
		CAMK2G	FLNA	T2336	NetworKIN	0.0676632		CAMK2G	FLNA	T2336	NetworKIN	0.543976		CAMK2G	FLNA	T2336	NetworKIN	-0.0431227		CAMK2G	FLNA	T2336	NetworKIN	-0.0215791
		CAMK2G	CAMK2D	T287	NetworKIN	-0.568473		CAMK2G	CAMK2D	T287	NetworKIN	-0.139768		CAMK2G	CAMK2D	T287	NetworKIN	-0.77708		CAMK2G	CAMK2D	T287	NetworKIN	-0.354361
		CAMK4	PHKA1	S1018	NetworKIN	0.0105153		CAMK4	PHKA1	S1018	NetworKIN	-0.394019		CAMK4	PHKA1	S1018	NetworKIN	-0.0470831		CAMK4	PHKA1	S1018	NetworKIN	-0.260895
		CAMK4	XPO1	S1055	NetworKIN	-0.0870193		CAMK4	XPO1	S1055	NetworKIN	0.205914		CAMK4	XPO1	S1055	NetworKIN	0.158133		CAMK4	XPO1	S1055	NetworKIN	0.203414
		CAMK4	MEF2D	S121	NetworKIN	-0.164451		CAMK4	MEF2D	S121	NetworKIN	0.0441518		CAMK4	MEF2D	S121	NetworKIN	-0.345709		CAMK4	MEF2D	S121	NetworKIN	-0.240924
		CAMK4	PRKACA	S140	NetworKIN	-0.120014		CAMK4	PRKACA	S140	NetworKIN	-0.151208		CAMK4	PRKACA	S140	NetworKIN	0.0260225		CAMK4	PRKACA	S140	NetworKIN	-0.0919312
		CAMK4	EEF2K	S18	NetworKIN	0.192864		CAMK4	EEF2K	S18	NetworKIN	0.202311		CAMK4	EEF2K	S18	NetworKIN	-0.011045		CAMK4	EEF2K	S18	NetworKIN	0.61071
		CAMK4	HDAC4	S246	NetworKIN	-0.353839		CAMK4	HDAC4	S246	NetworKIN	-0.572466		CAMK4	HDAC4	S246	NetworKIN	-0.715471		CAMK4	HDAC4	S246	NetworKIN	-0.248214
		CAMK4	MEF2D	S251	NetworKIN	-0.166393		CAMK4	MEF2D	S251	NetworKIN	0.187161		CAMK4	MEF2D	S251	NetworKIN	0.172716		CAMK4	MEF2D	S251	NetworKIN	0.148333
		CAMK4	RRAD	S273	NetworKIN	0.241494		CAMK4	RRAD	S273	NetworKIN	0.784128		CAMK4	RRAD	S273	NetworKIN	0.705485		CAMK4	RRAD	S273	NetworKIN	0.974401
		CAMK4	CAMK2D	S333	NetworKIN	-0.137635		CAMK4	CAMK2D	S333	NetworKIN	0.211022		CAMK4	CAMK2D	S333	NetworKIN	-0.328143		CAMK4	CAMK2D	S333	NetworKIN	0.0236544
		CAMK4	HDAC4	S467	NetworKIN	-0.144354		CAMK4	HDAC4	S467	NetworKIN	-0.112303		CAMK4	HDAC4	S467	NetworKIN	-0.472938		CAMK4	HDAC4	S467	NetworKIN	-0.159967
		CAMK4	EEF2K	S500	NetworKIN	-2.61117		CAMK4	EEF2K	S500	NetworKIN	-0.659779		CAMK4	EEF2K	S500	NetworKIN	-2.26615		CAMK4	EEF2K	S500	NetworKIN	-1.34658
		CAMK4	CAMKK2	S511	NetworKIN	-0.231121		CAMK4	CAMKK2	S511	NetworKIN	0.378747		CAMK4	CAMKK2	S511	NetworKIN	-0.234318		CAMK4	CAMKK2	S511	NetworKIN	-0.112147
		CAMK4	PML	S518	NetworKIN	-0.0260663		CAMK4	PML	S518	NetworKIN	-0.0619955		CAMK4	PML	S518	NetworKIN	-0.142899		CAMK4	PML	S518	NetworKIN	-0.0488078
		CAMK4	PRKAR2A	S58	NetworKIN	-0.0166637		CAMK4	PRKAR2A	S58	NetworKIN	-0.0823947		CAMK4	PRKAR2A	S58	NetworKIN	-0.231985		CAMK4	PRKAR2A	S58	NetworKIN	-0.158718
		CAMK4	HDAC4	S632	NetworKIN	-0.198077		CAMK4	HDAC4	S632	NetworKIN	-0.14394		CAMK4	HDAC4	S632	NetworKIN	-0.239028		CAMK4	HDAC4	S632	NetworKIN	0.00702293
		CAMK4	TNIK	S640	NetworKIN	-0.251176		CAMK4	TNIK	S640	NetworKIN	-0.129953		CAMK4	TNIK	S640	NetworKIN	-0.16284		CAMK4	TNIK	S640	NetworKIN	-0.10347
		CAMK4	PRKCD	S645	NetworKIN	-0.172449		CAMK4	PRKCD	S645	NetworKIN	0.567801		CAMK4	PRKCD	S645	NetworKIN	-0.174828		CAMK4	PRKCD	S645	NetworKIN	0.180935
		CAMK4	PHKB	S700	NetworKIN	0.0702085		CAMK4	PHKB	S700	NetworKIN	0.0882535		CAMK4	PHKB	S700	NetworKIN	0.145648		CAMK4	PHKB	S700	NetworKIN	0.252538
		CAMK4	SLC9A1	S703	NetworKIN	0.184902		CAMK4	SLC9A1	S703	NetworKIN	0.326927		CAMK4	SLC9A1	S703	NetworKIN	-0.0525811		CAMK4	SLC9A1	S703	NetworKIN	0.050642
		CAMK4	TNIK	S707	NetworKIN	-0.246283		CAMK4	TNIK	S707	NetworKIN	-0.406003		CAMK4	TNIK	S707	NetworKIN	-0.101191		CAMK4	TNIK	S707	NetworKIN	-0.0926669
		CAMK4	BAD	S75	NetworKIN	0.0232766		CAMK4	BAD	S75	NetworKIN	0.511905		CAMK4	BAD	S75	NetworKIN	-0.344185		CAMK4	BAD	S75	NetworKIN	0.167307
		CAMK4	TNIK	S764	NetworKIN	-0.111419		CAMK4	TNIK	S764	NetworKIN	-0.0447882		CAMK4	TNIK	S764	NetworKIN	-0.12792		CAMK4	TNIK	S764	NetworKIN	-0.0452962
		CAMK4	PRKAR2A	S78	NetworKIN	0.0231678		CAMK4	PRKAR2A	S78	NetworKIN	0.0677798		CAMK4	PRKAR2A	S78	NetworKIN	0.00315091		CAMK4	PRKAR2A	S78	NetworKIN	0.181608
		CAMK4	PRKAR2A	S80	NetworKIN	0.310193		CAMK4	PRKAR2A	S80	NetworKIN	0.0535732		CAMK4	PRKAR2A	S80	NetworKIN	0.33025		CAMK4	PRKAR2A	S80	NetworKIN	0.503573
		CAMK4	GAPDH	S83	NetworKIN	-0.0492678		CAMK4	GAPDH	S83	NetworKIN	-0.0640536		CAMK4	GAPDH	S83	NetworKIN	0.0217917		CAMK4	GAPDH	S83	NetworKIN	-0.00214243
		CAMK4	MAP2	S833	NetworKIN	-0.142491		CAMK4	MAP2	S833	NetworKIN	-0.20687		CAMK4	MAP2	S833	NetworKIN	-0.138067		CAMK4	MAP2	S833	NetworKIN	-0.00156033
		CAMK4	PRKAR2A	S99	NetworKIN	0.364506		CAMK4	PRKAR2A	S99	NetworKIN	0.154254		CAMK4	PRKAR2A	S99	NetworKIN	0.0751869		CAMK4	PRKAR2A	S99	NetworKIN	0.236818
		CDC42BPA	MYO18A	S1067	NetworKIN	0.0292723		CDC42BPA	MYO18A	S1067	NetworKIN	0.147455		CDC42BPA	MYO18A	S1067	NetworKIN	-0.0440342		CDC42BPA	MYO18A	S1067	NetworKIN	0.0189444
		CDC42BPA	MYO18A	S140	NetworKIN	-0.321875		CDC42BPA	MYO18A	S140	NetworKIN	-0.198282		CDC42BPA	MYO18A	S140	NetworKIN	-0.184515		CDC42BPA	MYO18A	S140	NetworKIN	0.0476192
		CDC42BPA	MYL2	S15	NetworKIN	-0.323953		CDC42BPA	MYL2	S15	NetworKIN	-0.098967		CDC42BPA	MYL2	S15	NetworKIN	-0.482782		CDC42BPA	MYL2	S15	NetworKIN	-0.230707
		CDC42BPA	MYO18A	S1970	NetworKIN	0.117629		CDC42BPA	MYO18A	S1970	NetworKIN	0.423411		CDC42BPA	MYO18A	S1970	NetworKIN	-0.258961		CDC42BPA	MYO18A	S1970	NetworKIN	0.303567
		CDC42BPA	MYO18A	S1998	NetworKIN	-0.385217		CDC42BPA	MYO18A	S1998	NetworKIN	-0.091847		CDC42BPA	MYO18A	S1998	NetworKIN	-0.329887		CDC42BPA	MYO18A	S1998	NetworKIN	-0.138663
		CDC42BPA	MYO18A	S2002	NetworKIN	-0.721666		CDC42BPA	MYO18A	S2002	NetworKIN	-0.454553		CDC42BPA	MYO18A	S2002	NetworKIN	-0.31313		CDC42BPA	MYO18A	S2002	NetworKIN	-0.444875
		CDC42BPA	MYO18A	S2020	NetworKIN	0.199423		CDC42BPA	MYO18A	S2020	NetworKIN	0.0484215		CDC42BPA	MYO18A	S2020	NetworKIN	0.138985		CDC42BPA	MYO18A	S2020	NetworKIN	-0.04529
		CDC42BPA	ZBTB7A	S337	NetworKIN	0.334822		CDC42BPA	ZBTB7A	S337	NetworKIN	-0.098237		CDC42BPA	ZBTB7A	S337	NetworKIN	0.174713		CDC42BPA	ZBTB7A	S337	NetworKIN	-0.120474
		CDC42BPA	ZBTB7A	S526	NetworKIN	-0.142241		CDC42BPA	ZBTB7A	S526	NetworKIN	-0.000345591		CDC42BPA	ZBTB7A	S526	NetworKIN	-0.176682		CDC42BPA	ZBTB7A	S526	NetworKIN	-0.340465
		CDC42BPA	ZBTB7A	S549	NetworKIN	-0.12678		CDC42BPA	ZBTB7A	S549	NetworKIN	-0.02378		CDC42BPA	ZBTB7A	S549	NetworKIN	0.178544		CDC42BPA	ZBTB7A	S549	NetworKIN	0.0292704
		CDC42BPA	MYO18A	S72	NetworKIN	-0.864391		CDC42BPA	MYO18A	S72	NetworKIN	-0.713572		CDC42BPA	MYO18A	S72	NetworKIN	-0.887764		CDC42BPA	MYO18A	S72	NetworKIN	-0.837763
		CDC42BPA	MYO18A	S726	NetworKIN	-0.537878		CDC42BPA	MYO18A	S726	NetworKIN	-0.528778		CDC42BPA	MYO18A	S726	NetworKIN	-1.40242		CDC42BPA	MYO18A	S726	NetworKIN	-0.717317
		CDC42BPA	MYO18A	S728	NetworKIN	-0.193396		CDC42BPA	MYO18A	S728	NetworKIN	-0.219955		CDC42BPA	MYO18A	S728	NetworKIN	-2.16559		CDC42BPA	MYO18A	S728	NetworKIN	-2.14983
		CDC42BPA	MYO18A	S85	NetworKIN	-1.50808		CDC42BPA	MYO18A	S85	NetworKIN	-0.852055		CDC42BPA	MYO18A	S85	NetworKIN	-0.909513		CDC42BPA	MYO18A	S85	NetworKIN	-1.15727
		CDC42BPB	MYO18A	S1067	NetworKIN	0.0292723		CDC42BPB	MYO18A	S1067	NetworKIN	0.147455		CDC42BPB	MYO18A	S1067	NetworKIN	-0.0440342		CDC42BPB	MYO18A	S1067	NetworKIN	0.0189444
		CDC42BPB	MYO18A	S140	NetworKIN	-0.321875		CDC42BPB	MYO18A	S140	NetworKIN	-0.198282		CDC42BPB	MYO18A	S140	NetworKIN	-0.184515		CDC42BPB	MYO18A	S140	NetworKIN	0.0476192
		CDC42BPB	MYO18A	S1970	NetworKIN	0.117629		CDC42BPB	MYO18A	S1970	NetworKIN	0.423411		CDC42BPB	MYO18A	S1970	NetworKIN	-0.258961		CDC42BPB	MYO18A	S1970	NetworKIN	0.303567
		CDC42BPB	MYO18A	S1998	NetworKIN	-0.385217		CDC42BPB	MYO18A	S1998	NetworKIN	-0.091847		CDC42BPB	MYO18A	S1998	NetworKIN	-0.329887		CDC42BPB	MYO18A	S1998	NetworKIN	-0.138663
		CDC42BPB	MYO18A	S2002	NetworKIN	-0.721666		CDC42BPB	MYO18A	S2002	NetworKIN	-0.454553		CDC42BPB	MYO18A	S2002	NetworKIN	-0.31313		CDC42BPB	MYO18A	S2002	NetworKIN	-0.444875
		CDC42BPB	MYO18A	S2020	NetworKIN	0.199423		CDC42BPB	MYO18A	S2020	NetworKIN	0.0484215		CDC42BPB	MYO18A	S2020	NetworKIN	0.138985		CDC42BPB	MYO18A	S2020	NetworKIN	-0.04529
		CDC42BPB	MYO18A	S72	NetworKIN	-0.864391		CDC42BPB	MYO18A	S72	NetworKIN	-0.713572		CDC42BPB	MYO18A	S72	NetworKIN	-0.887764		CDC42BPB	MYO18A	S72	NetworKIN	-0.837763
		CDC42BPB	MYO18A	S726	NetworKIN	-0.537878		CDC42BPB	MYO18A	S726	NetworKIN	-0.528778		CDC42BPB	MYO18A	S726	NetworKIN	-1.40242		CDC42BPB	MYO18A	S726	NetworKIN	-0.717317
		CDC42BPB	MYO18A	S728	NetworKIN	-0.193396		CDC42BPB	MYO18A	S728	NetworKIN	-0.219955		CDC42BPB	MYO18A	S728	NetworKIN	-2.16559		CDC42BPB	MYO18A	S728	NetworKIN	-2.14983
		CDC42BPB	MYO18A	S85	NetworKIN	-1.50808		CDC42BPB	MYO18A	S85	NetworKIN	-0.852055		CDC42BPB	MYO18A	S85	NetworKIN	-0.909513		CDC42BPB	MYO18A	S85	NetworKIN	-1.15727
		CDK1	CDKN1B	S10	NetworKIN	-0.569669		CDK1	CDKN1B	S10	NetworKIN	-0.469392		CDK1	CDKN1B	S10	NetworKIN	-0.335243		CDK1	CDKN1B	S10	NetworKIN	-0.187349
		CDK1	TCEA1	S100	NetworKIN	-0.144944		CDK1	TCEA1	S100	NetworKIN	-0.0903744		CDK1	TCEA1	S100	NetworKIN	-0.122986		CDK1	TCEA1	S100	NetworKIN	-0.0262842
		CDK1	DNMT3A	S105	NetworKIN	-0.110458		CDK1	DNMT3A	S105	NetworKIN	-0.187114		CDK1	DNMT3A	S105	NetworKIN	-0.0200314		CDK1	DNMT3A	S105	NetworKIN	0.035875
		CDK1	PXN	S106	NetworKIN	0.0104198		CDK1	PXN	S106	NetworKIN	0.034827		CDK1	PXN	S106	NetworKIN	-0.477354		CDK1	PXN	S106	NetworKIN	-0.0800512
		CDK1	SOS1	S1082	NetworKIN	-0.0175512		CDK1	SOS1	S1082	NetworKIN	-0.0770498		CDK1	SOS1	S1082	NetworKIN	0.0465325		CDK1	SOS1	S1082	NetworKIN	-0.082933
		CDK1	CLASP1	S1091	NetworKIN	-0.316505		CDK1	CLASP1	S1091	NetworKIN	-0.215312		CDK1	CLASP1	S1091	NetworKIN	-0.277838		CDK1	CLASP1	S1091	NetworKIN	0.1171
		CDK1	NUP160	S1157	NetworKIN	0.0132858		CDK1	NUP160	S1157	NetworKIN	-0.0439843		CDK1	NUP160	S1157	NetworKIN	-0.161587		CDK1	NUP160	S1157	NetworKIN	0.00641859
		CDK1	BRAP	S117	NetworKIN	-0.112438		CDK1	BRAP	S117	NetworKIN	0.0667281		CDK1	BRAP	S117	NetworKIN	-0.168931		CDK1	BRAP	S117	NetworKIN	0.109784
		CDK1	RBBP6	S1179	NetworKIN	-0.275988		CDK1	RBBP6	S1179	NetworKIN	-0.0345099		CDK1	RBBP6	S1179	NetworKIN	-0.182056		CDK1	RBBP6	S1179	NetworKIN	-0.112825
		CDK1	CLASP1	S1223	NetworKIN	-0.616068		CDK1	CLASP1	S1223	NetworKIN	-0.378943		CDK1	CLASP1	S1223	NetworKIN	-0.328484		CDK1	CLASP1	S1223	NetworKIN	0.126223
		CDK1	SNAPC4	S1224	NetworKIN	0.225044		CDK1	SNAPC4	S1224	NetworKIN	0.414575		CDK1	SNAPC4	S1224	NetworKIN	-0.0785771		CDK1	SNAPC4	S1224	NetworKIN	-0.128893
		CDK1	MAP1B	S1256	NetworKIN	0.109832		CDK1	MAP1B	S1256	NetworKIN	0.453652		CDK1	MAP1B	S1256	NetworKIN	0.144163		CDK1	MAP1B	S1256	NetworKIN	0.18723
		CDK1	MAP1B	S1265	NetworKIN	-0.0980546		CDK1	MAP1B	S1265	NetworKIN	0.145732		CDK1	MAP1B	S1265	NetworKIN	-0.0287158		CDK1	MAP1B	S1265	NetworKIN	0.248489
		CDK1	TACC2	S1313	NetworKIN	-0.0029734		CDK1	TACC2	S1313	NetworKIN	0.00750322		CDK1	TACC2	S1313	NetworKIN	-0.126453		CDK1	TACC2	S1313	NetworKIN	0.0856604
		CDK1	SNAPIN	S133	NetworKIN	-0.15716		CDK1	SNAPIN	S133	NetworKIN	0.0563145		CDK1	SNAPIN	S133	NetworKIN	-0.315434		CDK1	SNAPIN	S133	NetworKIN	-0.0538581
		CDK1	MAP2	S1347	NetworKIN	0.350648		CDK1	MAP2	S1347	NetworKIN	0.405267		CDK1	MAP2	S1347	NetworKIN	0.0990661		CDK1	MAP2	S1347	NetworKIN	0.187795
		CDK1	TSC2	S1411	NetworKIN	-0.217834		CDK1	TSC2	S1411	NetworKIN	-0.248077		CDK1	TSC2	S1411	NetworKIN	-0.295882		CDK1	TSC2	S1411	NetworKIN	-0.173069
		CDK1	NCOR1	S1472	NetworKIN	-0.10342		CDK1	NCOR1	S1472	NetworKIN	-0.131983		CDK1	NCOR1	S1472	NetworKIN	-0.134327		CDK1	NCOR1	S1472	NetworKIN	-0.0798715
		CDK1	HCFC1	S1507	NetworKIN	-0.0633096		CDK1	HCFC1	S1507	NetworKIN	0.0557025		CDK1	HCFC1	S1507	NetworKIN	-0.18644		CDK1	HCFC1	S1507	NetworKIN	-0.0412886
		CDK1	PSMF1	S152	NetworKIN	0.288464		CDK1	PSMF1	S152	NetworKIN	0.382715		CDK1	PSMF1	S152	NetworKIN	0.719809		CDK1	PSMF1	S152	NetworKIN	0.189053
		CDK1	PSMF1	S153	NetworKIN	0.752952		CDK1	PSMF1	S153	NetworKIN	0.831003		CDK1	PSMF1	S153	NetworKIN	0.243074		CDK1	PSMF1	S153	NetworKIN	0.639425
		CDK1	GGA3	S159	NetworKIN	0.0441245		CDK1	GGA3	S159	NetworKIN	0.166518		CDK1	GGA3	S159	NetworKIN	0.0189889		CDK1	GGA3	S159	NetworKIN	0.0321593
		CDK1	PSMD2	S16	NetworKIN	-0.10669		CDK1	PSMD2	S16	NetworKIN	-0.00486852		CDK1	PSMD2	S16	NetworKIN	-0.179518		CDK1	PSMD2	S16	NetworKIN	0.813721
		CDK1	TACC2	S1635	NetworKIN	-0.335359		CDK1	TACC2	S1635	NetworKIN	-0.129529		CDK1	TACC2	S1635	NetworKIN	-0.408504		CDK1	TACC2	S1635	NetworKIN	0.271267
		CDK1	KIF13B	S1644	NetworKIN	0.0660161		CDK1	KIF13B	S1644	NetworKIN	-0.116234		CDK1	KIF13B	S1644	NetworKIN	-0.00950912		CDK1	KIF13B	S1644	NetworKIN	0.0686256
		CDK1	CNOT2	S165	NetworKIN	-0.00826895		CDK1	CNOT2	S165	NetworKIN	-0.0777318		CDK1	CNOT2	S165	NetworKIN	0.0409993		CDK1	CNOT2	S165	NetworKIN	-0.134621
		CDK1	WEE1	S165	NetworKIN	-0.142425		CDK1	WEE1	S165	NetworKIN	0.109062		CDK1	WEE1	S165	NetworKIN	-0.34358		CDK1	WEE1	S165	NetworKIN	-0.199041
		CDK1	GTF3C2	S167	NetworKIN	-0.207152		CDK1	GTF3C2	S167	NetworKIN	-0.047976		CDK1	GTF3C2	S167	NetworKIN	0.0342387		CDK1	GTF3C2	S167	NetworKIN	-0.140264
		CDK1	MAP1B	S1779	NetworKIN	-0.021334		CDK1	MAP1B	S1779	NetworKIN	-0.194454		CDK1	MAP1B	S1779	NetworKIN	-0.329492		CDK1	MAP1B	S1779	NetworKIN	-0.11386
		CDK1	CDKN1B	S178	NetworKIN	-0.452264		CDK1	CDKN1B	S178	NetworKIN	0.0206536		CDK1	CDKN1B	S178	NetworKIN	-0.316603		CDK1	CDKN1B	S178	NetworKIN	-0.18725
		CDK1	MAP2	S1782	NetworKIN	-0.0161984		CDK1	MAP2	S1782	NetworKIN	0.0234749		CDK1	MAP2	S1782	NetworKIN	-0.171776		CDK1	MAP2	S1782	NetworKIN	0.116844
		CDK1	GBF1	S1784	NetworKIN	0.131481		CDK1	GBF1	S1784	NetworKIN	0.138424		CDK1	GBF1	S1784	NetworKIN	-0.646289		CDK1	GBF1	S1784	NetworKIN	-0.190316
		CDK1	EEF2K	S18	NetworKIN	0.192864		CDK1	EEF2K	S18	NetworKIN	0.202311		CDK1	EEF2K	S18	NetworKIN	-0.011045		CDK1	EEF2K	S18	NetworKIN	0.61071
		CDK1	TPPP	S18	NetworKIN	0.00138959		CDK1	TPPP	S18	NetworKIN	0.321279		CDK1	TPPP	S18	NetworKIN	-0.468906		CDK1	TPPP	S18	NetworKIN	0.456339
		CDK1	ARAF	S186	NetworKIN	0.544552		CDK1	ARAF	S186	NetworKIN	0.156059		CDK1	ARAF	S186	NetworKIN	0.609365		CDK1	ARAF	S186	NetworKIN	0.434942
		CDK1	HOXC10	S189	NetworKIN	0.0171432		CDK1	HOXC10	S189	NetworKIN	0.0526539		CDK1	HOXC10	S189	NetworKIN	0.0744822		CDK1	HOXC10	S189	NetworKIN	-0.044157
		CDK1	CD2BP2	S195	NetworKIN	-0.191517		CDK1	CD2BP2	S195	NetworKIN	-0.326121		CDK1	CD2BP2	S195	NetworKIN	-0.0666552		CDK1	CD2BP2	S195	NetworKIN	-0.102148
		CDK1	CETN2	S20	NetworKIN	-0.104386		CDK1	CETN2	S20	NetworKIN	0.0215784		CDK1	CETN2	S20	NetworKIN	-0.0228449		CDK1	CETN2	S20	NetworKIN	0.0147583
		CDK1	TERF2IP	S203	NetworKIN	-0.302531		CDK1	TERF2IP	S203	NetworKIN	-0.0101153		CDK1	TERF2IP	S203	NetworKIN	-0.325775		CDK1	TERF2IP	S203	NetworKIN	-0.0134539
		CDK1	NUCKS1	S204	NetworKIN	0.0957148		CDK1	NUCKS1	S204	NetworKIN	-0.109873		CDK1	NUCKS1	S204	NetworKIN	0.25107		CDK1	NUCKS1	S204	NetworKIN	-0.08991
		CDK1	DYNC1LI1	S207	NetworKIN	0.363242		CDK1	DYNC1LI1	S207	NetworKIN	0.209981		CDK1	DYNC1LI1	S207	NetworKIN	0.186804		CDK1	DYNC1LI1	S207	NetworKIN	0.575205
		CDK1	SQSTM1	S207	NetworKIN	0.429235		CDK1	SQSTM1	S207	NetworKIN	0.278453		CDK1	SQSTM1	S207	NetworKIN	-0.194634		CDK1	SQSTM1	S207	NetworKIN	-0.0793739
		CDK1	USP10	S211	NetworKIN	0.117535		CDK1	USP10	S211	NetworKIN	-0.0197814		CDK1	USP10	S211	NetworKIN	-0.301491		CDK1	USP10	S211	NetworKIN	0.159341
		CDK1	WWP2	S211	NetworKIN	-0.770319		CDK1	WWP2	S211	NetworKIN	-0.473716		CDK1	WWP2	S211	NetworKIN	-0.0971265		CDK1	WWP2	S211	NetworKIN	-0.239316
		CDK1	NCOR1	S2120	NetworKIN	-0.149927		CDK1	NCOR1	S2120	NetworKIN	-0.22444		CDK1	NCOR1	S2120	NetworKIN	-0.0287035		CDK1	NCOR1	S2120	NetworKIN	-0.00735606
		CDK1	NUCKS1	S214	NetworKIN	-0.220883		CDK1	NUCKS1	S214	NetworKIN	-0.124098		CDK1	NUCKS1	S214	NetworKIN	-0.0780913		CDK1	NUCKS1	S214	NetworKIN	-0.116092
		CDK1	FLNA	S2180	NetworKIN	-0.040085		CDK1	FLNA	S2180	NetworKIN	0.368375		CDK1	FLNA	S2180	NetworKIN	-0.239189		CDK1	FLNA	S2180	NetworKIN	0.15361
		CDK1	NCOR1	S2184	NetworKIN	-0.13656		CDK1	NCOR1	S2184	NetworKIN	0.0818507		CDK1	NCOR1	S2184	NetworKIN	-0.370374		CDK1	NCOR1	S2184	NetworKIN	0.0260356
		CDK1	MEF2C	S222	NetworKIN	-0.168023		CDK1	MEF2C	S222	NetworKIN	-0.00664132		CDK1	MEF2C	S222	NetworKIN	-0.238247		CDK1	MEF2C	S222	NetworKIN	0.242689
		CDK1	TACC2	S2226	NetworKIN	0.0567645		CDK1	TACC2	S2226	NetworKIN	-0.0424811		CDK1	TACC2	S2226	NetworKIN	0.157841		CDK1	TACC2	S2226	NetworKIN	-0.208117
		CDK1	NUCKS1	S223	NetworKIN	0.148492		CDK1	NUCKS1	S223	NetworKIN	-0.174512		CDK1	NUCKS1	S223	NetworKIN	-0.108551		CDK1	NUCKS1	S223	NetworKIN	-0.133922
		CDK1	NCOR1	S224	NetworKIN	-0.164264		CDK1	NCOR1	S224	NetworKIN	-0.118937		CDK1	NCOR1	S224	NetworKIN	-0.144772		CDK1	NCOR1	S224	NetworKIN	-0.00898119
		CDK1	SNW1	S224	NetworKIN	-0.0127198		CDK1	SNW1	S224	NetworKIN	-0.134584		CDK1	SNW1	S224	NetworKIN	0.0326577		CDK1	SNW1	S224	NetworKIN	-0.0553373
		CDK1	SRF	S224	NetworKIN	-0.247709		CDK1	SRF	S224	NetworKIN	-0.154689		CDK1	SRF	S224	NetworKIN	-0.152396		CDK1	SRF	S224	NetworKIN	0.0346707
		CDK1	TACC2	S2256	NetworKIN	0.334874		CDK1	TACC2	S2256	NetworKIN	0.126163		CDK1	TACC2	S2256	NetworKIN	0.160818		CDK1	TACC2	S2256	NetworKIN	-0.0339683
		CDK1	APC	S2260	NetworKIN	-0.328261		CDK1	APC	S2260	NetworKIN	-0.332934		CDK1	APC	S2260	NetworKIN	-0.0969007		CDK1	APC	S2260	NetworKIN	-0.0269463
		CDK1	EPS15L1	S229	NetworKIN	0.0478395		CDK1	EPS15L1	S229	NetworKIN	-0.0273912		CDK1	EPS15L1	S229	NetworKIN	-0.205859		CDK1	EPS15L1	S229	NetworKIN	-0.0676234
		CDK1	STRN3	S229	NetworKIN	0.44322		CDK1	STRN3	S229	NetworKIN	0.196185		CDK1	STRN3	S229	NetworKIN	0.120974		CDK1	STRN3	S229	NetworKIN	0.298884
		CDK1	TACC2	S2317	NetworKIN	-0.361233		CDK1	TACC2	S2317	NetworKIN	-0.200735		CDK1	TACC2	S2317	NetworKIN	-0.0943858		CDK1	TACC2	S2317	NetworKIN	-0.00683885
		CDK1	LIG3	S242	NetworKIN	-0.419485		CDK1	LIG3	S242	NetworKIN	-0.0132807		CDK1	LIG3	S242	NetworKIN	-0.39077		CDK1	LIG3	S242	NetworKIN	-0.493927
		CDK1	SVIL	S245	NetworKIN	0.856907		CDK1	SVIL	S245	NetworKIN	0.802856		CDK1	SVIL	S245	NetworKIN	0.590878		CDK1	SVIL	S245	NetworKIN	0.52298
		CDK1	NF1	S2515	NetworKIN	-0.874654		CDK1	NF1	S2515	NetworKIN	-0.10071		CDK1	NF1	S2515	NetworKIN	-0.204678		CDK1	NF1	S2515	NetworKIN	-0.34155
		CDK1	ARAF	S257	NetworKIN	-0.545246		CDK1	ARAF	S257	NetworKIN	-0.902234		CDK1	ARAF	S257	NetworKIN	0.0135065		CDK1	ARAF	S257	NetworKIN	-0.306749
		CDK1	BAG3	S264	NetworKIN	0.0743493		CDK1	BAG3	S264	NetworKIN	-0.598664		CDK1	BAG3	S264	NetworKIN	-0.145328		CDK1	BAG3	S264	NetworKIN	-0.045286
		CDK1	XRCC1	S266	NetworKIN	0.204079		CDK1	XRCC1	S266	NetworKIN	0.336155		CDK1	XRCC1	S266	NetworKIN	-0.106449		CDK1	XRCC1	S266	NetworKIN	0.251697
		CDK1	APC	S2674	NetworKIN	0.0863284		CDK1	APC	S2674	NetworKIN	0.223757		CDK1	APC	S2674	NetworKIN	-0.00459946		CDK1	APC	S2674	NetworKIN	0.713875
		CDK1	MCM2	S27	NetworKIN	-0.450977		CDK1	MCM2	S27	NetworKIN	0.14128		CDK1	MCM2	S27	NetworKIN	-0.117751		CDK1	MCM2	S27	NetworKIN	-0.0419956
		CDK1	NSFL1C	S272	NetworKIN	-0.461089		CDK1	NSFL1C	S272	NetworKIN	-0.285165		CDK1	NSFL1C	S272	NetworKIN	-0.394538		CDK1	NSFL1C	S272	NetworKIN	0.0459065
		CDK1	MAP4	S280	NetworKIN	0.0660559		CDK1	MAP4	S280	NetworKIN	0.314668		CDK1	MAP4	S280	NetworKIN	-0.132146		CDK1	MAP4	S280	NetworKIN	0.888157
		CDK1	MAP2	S285	NetworKIN	0.0828259		CDK1	MAP2	S285	NetworKIN	0.215856		CDK1	MAP2	S285	NetworKIN	-0.392944		CDK1	MAP2	S285	NetworKIN	0.238787
		CDK1	FOXO1	S287	NetworKIN	-0.188767		CDK1	FOXO1	S287	NetworKIN	-0.208214		CDK1	FOXO1	S287	NetworKIN	-0.186232		CDK1	FOXO1	S287	NetworKIN	-0.0577884
		CDK1	HSF1	S303	NetworKIN	0.0242686		CDK1	HSF1	S303	NetworKIN	-0.186162		CDK1	HSF1	S303	NetworKIN	-0.133221		CDK1	HSF1	S303	NetworKIN	0.174412
		CDK1	CAP1	S308	NetworKIN	-0.0597598		CDK1	CAP1	S308	NetworKIN	-0.158294		CDK1	CAP1	S308	NetworKIN	0.474478		CDK1	CAP1	S308	NetworKIN	0.389659
		CDK1	UBE4B	S31	NetworKIN	0.000219186		CDK1	UBE4B	S31	NetworKIN	0.209895		CDK1	UBE4B	S31	NetworKIN	-0.0865547		CDK1	UBE4B	S31	NetworKIN	0.307213
		CDK1	DNAJB2	S313	NetworKIN	-0.0160718		CDK1	DNAJB2	S313	NetworKIN	-0.0585361		CDK1	DNAJB2	S313	NetworKIN	-0.179337		CDK1	DNAJB2	S313	NetworKIN	-0.427937
		CDK1	PSMD1	S315	NetworKIN	0.250178		CDK1	PSMD1	S315	NetworKIN	0.400634		CDK1	PSMD1	S315	NetworKIN	0.113167		CDK1	PSMD1	S315	NetworKIN	0.349792
		CDK1	DES	S32	NetworKIN	0.654953		CDK1	DES	S32	NetworKIN	0.557738		CDK1	DES	S32	NetworKIN	-0.128376		CDK1	DES	S32	NetworKIN	0.300742
		CDK1	ZC3HC1	S321	NetworKIN	0.671834		CDK1	ZC3HC1	S321	NetworKIN	0.511088		CDK1	ZC3HC1	S321	NetworKIN	0.148824		CDK1	ZC3HC1	S321	NetworKIN	0.502746
		CDK1	NFYA	S326	NetworKIN	-0.147672		CDK1	NFYA	S326	NetworKIN	-0.0803995		CDK1	NFYA	S326	NetworKIN	0.113108		CDK1	NFYA	S326	NetworKIN	-0.171767
		CDK1	BCL6	S333	NetworKIN	0.0104938		CDK1	BCL6	S333	NetworKIN	0.275843		CDK1	BCL6	S333	NetworKIN	-0.00788288		CDK1	BCL6	S333	NetworKIN	-0.0539751
		CDK1	RANBP3	S333	NetworKIN	0.0153916		CDK1	RANBP3	S333	NetworKIN	-0.154124		CDK1	RANBP3	S333	NetworKIN	0.0382868		CDK1	RANBP3	S333	NetworKIN	0.125626
		CDK1	IRS1	S348	NetworKIN	-0.923015		CDK1	IRS1	S348	NetworKIN	-0.959854		CDK1	IRS1	S348	NetworKIN	0.413863		CDK1	IRS1	S348	NetworKIN	0.075369
		CDK1	DMD	S3537	NetworKIN	-0.0561721		CDK1	DMD	S3537	NetworKIN	0.423278		CDK1	DMD	S3537	NetworKIN	-0.0988004		CDK1	DMD	S3537	NetworKIN	0.492048
		CDK1	MAP4	S358	NetworKIN	-0.647423		CDK1	MAP4	S358	NetworKIN	-0.361557		CDK1	MAP4	S358	NetworKIN	-0.697517		CDK1	MAP4	S358	NetworKIN	0.086504
		CDK1	DMD	S3613	NetworKIN	-0.208439		CDK1	DMD	S3613	NetworKIN	0.134794		CDK1	DMD	S3613	NetworKIN	-0.349469		CDK1	DMD	S3613	NetworKIN	0.397001
		CDK1	CSNK1E	S363	NetworKIN	-0.504906		CDK1	CSNK1E	S363	NetworKIN	-0.452232		CDK1	CSNK1E	S363	NetworKIN	-0.232455		CDK1	CSNK1E	S363	NetworKIN	-0.178288
		CDK1	HSF1	S363	NetworKIN	-0.0919769		CDK1	HSF1	S363	NetworKIN	0.146966		CDK1	HSF1	S363	NetworKIN	-0.246426		CDK1	HSF1	S363	NetworKIN	0.144783
		CDK1	CAMK2B	S367	NetworKIN	0.87854		CDK1	CAMK2B	S367	NetworKIN	0.918069		CDK1	CAMK2B	S367	NetworKIN	0.12342		CDK1	CAMK2B	S367	NetworKIN	1.88622
		CDK1	USP10	S370	NetworKIN	-0.0917757		CDK1	USP10	S370	NetworKIN	0.120917		CDK1	USP10	S370	NetworKIN	-0.448753		CDK1	USP10	S370	NetworKIN	0.088312
		CDK1	PRKAA2	S377	NetworKIN	0.383782		CDK1	PRKAA2	S377	NetworKIN	0.470911		CDK1	PRKAA2	S377	NetworKIN	0.535754		CDK1	PRKAA2	S377	NetworKIN	0.133803
		CDK1	BAG3	S386	NetworKIN	-0.23572		CDK1	BAG3	S386	NetworKIN	-0.0270669		CDK1	BAG3	S386	NetworKIN	0.213376		CDK1	BAG3	S386	NetworKIN	0.300088
		CDK1	DAB2	S401	NetworKIN	0.154806		CDK1	DAB2	S401	NetworKIN	0.493613		CDK1	DAB2	S401	NetworKIN	0.0225121		CDK1	DAB2	S401	NetworKIN	0.514332
		CDK1	DYNC1LI2	S407	NetworKIN	-0.153854		CDK1	DYNC1LI2	S407	NetworKIN	-0.181229		CDK1	DYNC1LI2	S407	NetworKIN	-0.129714		CDK1	DYNC1LI2	S407	NetworKIN	-0.0793171
		CDK1	MCM2	S41	NetworKIN	-0.134169		CDK1	MCM2	S41	NetworKIN	-0.3147		CDK1	MCM2	S41	NetworKIN	-0.183964		CDK1	MCM2	S41	NetworKIN	-0.149961
		CDK1	CHAF1B	S410	NetworKIN	0.470534		CDK1	CHAF1B	S410	NetworKIN	0.0974261		CDK1	CHAF1B	S410	NetworKIN	0.267125		CDK1	CHAF1B	S410	NetworKIN	0.213703
		CDK1	USP20	S413	NetworKIN	-0.4092		CDK1	USP20	S413	NetworKIN	-0.250582		CDK1	USP20	S413	NetworKIN	-0.206005		CDK1	USP20	S413	NetworKIN	-0.10463
		CDK1	TAOK1	S421	NetworKIN	-0.445182		CDK1	TAOK1	S421	NetworKIN	-0.0625926		CDK1	TAOK1	S421	NetworKIN	-0.230101		CDK1	TAOK1	S421	NetworKIN	-0.225917
		CDK1	MAD1L1	S428	NetworKIN	-0.313659		CDK1	MAD1L1	S428	NetworKIN	0.148841		CDK1	MAD1L1	S428	NetworKIN	-0.42677		CDK1	MAD1L1	S428	NetworKIN	0.284998
		CDK1	RPS6KB1	S441	NetworKIN	0.0442686		CDK1	RPS6KB1	S441	NetworKIN	0.219326		CDK1	RPS6KB1	S441	NetworKIN	0.208453		CDK1	RPS6KB1	S441	NetworKIN	0.313068
		CDK1	DYNC1LI2	S446	NetworKIN	-0.179532		CDK1	DYNC1LI2	S446	NetworKIN	-0.132044		CDK1	DYNC1LI2	S446	NetworKIN	-0.294471		CDK1	DYNC1LI2	S446	NetworKIN	0.101364
		CDK1	XRCC1	S447	NetworKIN	-0.0612322		CDK1	XRCC1	S447	NetworKIN	0.0226039		CDK1	XRCC1	S447	NetworKIN	-0.385911		CDK1	XRCC1	S447	NetworKIN	0.0163798
		CDK1	CAMK2D	S472	NetworKIN	-0.417199		CDK1	CAMK2D	S472	NetworKIN	-0.303906		CDK1	CAMK2D	S472	NetworKIN	-0.498143		CDK1	CAMK2D	S472	NetworKIN	-0.0611179
		CDK1	CCNT2	S480	NetworKIN	-0.397176		CDK1	CCNT2	S480	NetworKIN	-0.0592113		CDK1	CCNT2	S480	NetworKIN	-0.233589		CDK1	CCNT2	S480	NetworKIN	0.111155
		CDK1	EMD	S49	NetworKIN	0.060161		CDK1	EMD	S49	NetworKIN	0.00938414		CDK1	EMD	S49	NetworKIN	-0.197998		CDK1	EMD	S49	NetworKIN	-0.205168
		CDK1	TACC2	S493	NetworKIN	0.233815		CDK1	TACC2	S493	NetworKIN	0.102219		CDK1	TACC2	S493	NetworKIN	0.020695		CDK1	TACC2	S493	NetworKIN	0.80358
		CDK1	TSC1	S505	NetworKIN	-0.0957961		CDK1	TSC1	S505	NetworKIN	-0.303977		CDK1	TSC1	S505	NetworKIN	0.107126		CDK1	TSC1	S505	NetworKIN	0.290712
		CDK1	MAP4	S507	NetworKIN	0.177354		CDK1	MAP4	S507	NetworKIN	0.265793		CDK1	MAP4	S507	NetworKIN	-0.238002		CDK1	MAP4	S507	NetworKIN	0.909291
		CDK1	DYNC1LI1	S516	NetworKIN	0.709355		CDK1	DYNC1LI1	S516	NetworKIN	0.984722		CDK1	DYNC1LI1	S516	NetworKIN	-0.444801		CDK1	DYNC1LI1	S516	NetworKIN	0.267689
		CDK1	RUSC2	S536	NetworKIN	0.56545		CDK1	RUSC2	S536	NetworKIN	0.451003		CDK1	RUSC2	S536	NetworKIN	0.488891		CDK1	RUSC2	S536	NetworKIN	0.36087
		CDK1	EPB41L1	S544	NetworKIN	-0.618495		CDK1	EPB41L1	S544	NetworKIN	-0.227926		CDK1	EPB41L1	S544	NetworKIN	-0.463178		CDK1	EPB41L1	S544	NetworKIN	-0.452505
		CDK1	NOC2L	S56	NetworKIN	-0.0789348		CDK1	NOC2L	S56	NetworKIN	-0.0926538		CDK1	NOC2L	S56	NetworKIN	-0.0723757		CDK1	NOC2L	S56	NetworKIN	-0.0480417
		CDK1	PSMA5	S56	NetworKIN	0.0561409		CDK1	PSMA5	S56	NetworKIN	0.802859		CDK1	PSMA5	S56	NetworKIN	-0.149377		CDK1	PSMA5	S56	NetworKIN	0.480335
		CDK1	VIM	S56	NetworKIN	0.0434849		CDK1	VIM	S56	NetworKIN	-0.0523181		CDK1	VIM	S56	NetworKIN	0.0551551		CDK1	VIM	S56	NetworKIN	0.163689
		CDK1	NCL	S563	NetworKIN	-0.0271361		CDK1	NCL	S563	NetworKIN	-0.308696		CDK1	NCL	S563	NetworKIN	0.382671		CDK1	NCL	S563	NetworKIN	0.552402
		CDK1	CLASP1	S572	NetworKIN	0.595413		CDK1	CLASP1	S572	NetworKIN	0.138499		CDK1	CLASP1	S572	NetworKIN	0.578692		CDK1	CLASP1	S572	NetworKIN	1.16464
		CDK1	KHDRBS1	S58	NetworKIN	-0.202968		CDK1	KHDRBS1	S58	NetworKIN	0.0130246		CDK1	KHDRBS1	S58	NetworKIN	-0.362177		CDK1	KHDRBS1	S58	NetworKIN	-0.20998
		CDK1	TRIM28	S594	NetworKIN	-0.139949		CDK1	TRIM28	S594	NetworKIN	0.0795758		CDK1	TRIM28	S594	NetworKIN	-0.272691		CDK1	TRIM28	S594	NetworKIN	0.156
		CDK1	PARN	S619	NetworKIN	-0.112881		CDK1	PARN	S619	NetworKIN	-0.104419		CDK1	PARN	S619	NetworKIN	-0.32746		CDK1	PARN	S619	NetworKIN	0.122771
		CDK1	IRS1	S636	NetworKIN	-0.0857303		CDK1	IRS1	S636	NetworKIN	-0.141597		CDK1	IRS1	S636	NetworKIN	-0.230654		CDK1	IRS1	S636	NetworKIN	0.310924
		CDK1	RBL2	S639	NetworKIN	-0.464092		CDK1	RBL2	S639	NetworKIN	0.205596		CDK1	RBL2	S639	NetworKIN	-0.00732032		CDK1	RBL2	S639	NetworKIN	-0.00606948
		CDK1	MAP1S	S640	NetworKIN	-0.583214		CDK1	MAP1S	S640	NetworKIN	0.141517		CDK1	MAP1S	S640	NetworKIN	-0.576462		CDK1	MAP1S	S640	NetworKIN	-0.575408
		CDK1	ATN1	S645	NetworKIN	-0.154586		CDK1	ATN1	S645	NetworKIN	0.116791		CDK1	ATN1	S645	NetworKIN	0.0782586		CDK1	ATN1	S645	NetworKIN	0.0259263
		CDK1	RB1CC1	S647	NetworKIN	-0.373767		CDK1	RB1CC1	S647	NetworKIN	0.190099		CDK1	RB1CC1	S647	NetworKIN	-0.197388		CDK1	RB1CC1	S647	NetworKIN	0.156609
		CDK1	EIF4EBP1	S65	NetworKIN	-0.315819		CDK1	EIF4EBP1	S65	NetworKIN	-0.076274		CDK1	EIF4EBP1	S65	NetworKIN	-0.326703		CDK1	EIF4EBP1	S65	NetworKIN	-0.125688
		CDK1	LMNA	S652	NetworKIN	0.570389		CDK1	LMNA	S652	NetworKIN	0.663123		CDK1	LMNA	S652	NetworKIN	-0.00568196		CDK1	LMNA	S652	NetworKIN	0.515097
		CDK1	UIMC1	S653	NetworKIN	0.17362		CDK1	UIMC1	S653	NetworKIN	0.0993889		CDK1	UIMC1	S653	NetworKIN	0.470415		CDK1	UIMC1	S653	NetworKIN	0.142285
		CDK1	NCL	S67	NetworKIN	0.273063		CDK1	NCL	S67	NetworKIN	0.0620833		CDK1	NCL	S67	NetworKIN	0.283672		CDK1	NCL	S67	NetworKIN	0.837762
		CDK1	RBM15	S670	NetworKIN	-0.0294438		CDK1	RBM15	S670	NetworKIN	0.147253		CDK1	RBM15	S670	NetworKIN	0.251485		CDK1	RBM15	S670	NetworKIN	0.350329
		CDK1	NUP214	S678	NetworKIN	0.102079		CDK1	NUP214	S678	NetworKIN	0.214819		CDK1	NUP214	S678	NetworKIN	-0.229434		CDK1	NUP214	S678	NetworKIN	0.223379
		CDK1	NES	S680	NetworKIN	0.413246		CDK1	NES	S680	NetworKIN	0.601194		CDK1	NES	S680	NetworKIN	0.241199		CDK1	NES	S680	NetworKIN	0.42766
		CDK1	SET	S7	NetworKIN	-0.0785255		CDK1	SET	S7	NetworKIN	-0.0741129		CDK1	SET	S7	NetworKIN	-0.0358264		CDK1	SET	S7	NetworKIN	-0.00345221
		CDK1	RBM15	S700	NetworKIN	-0.0257571		CDK1	RBM15	S700	NetworKIN	-0.0137378		CDK1	RBM15	S700	NetworKIN	0.0659961		CDK1	RBM15	S700	NetworKIN	0.0521499
		CDK1	PRKAG2	S71	NetworKIN	0.169171		CDK1	PRKAG2	S71	NetworKIN	0.275496		CDK1	PRKAG2	S71	NetworKIN	0.018306		CDK1	PRKAG2	S71	NetworKIN	0.590237
		CDK1	CLASP1	S714	NetworKIN	0.339619		CDK1	CLASP1	S714	NetworKIN	-0.0560427		CDK1	CLASP1	S714	NetworKIN	0.529855		CDK1	CLASP1	S714	NetworKIN	0.121876
		CDK1	RBM10	S723	NetworKIN	0.0292485		CDK1	RBM10	S723	NetworKIN	-0.057735		CDK1	RBM10	S723	NetworKIN	-0.0311872		CDK1	RBM10	S723	NetworKIN	0.0133066
		CDK1	STAT3	S727	NetworKIN	0.339506		CDK1	STAT3	S727	NetworKIN	0.186147		CDK1	STAT3	S727	NetworKIN	-0.0331908		CDK1	STAT3	S727	NetworKIN	0.114411
		CDK1	NCOA2	S736	NetworKIN	-0.0394309		CDK1	NCOA2	S736	NetworKIN	0.161884		CDK1	NCOA2	S736	NetworKIN	0.149259		CDK1	NCOA2	S736	NetworKIN	0.0463776
		CDK1	CALD1	S759	NetworKIN	0.585455		CDK1	CALD1	S759	NetworKIN	1.11254		CDK1	CALD1	S759	NetworKIN	0.0730677		CDK1	CALD1	S759	NetworKIN	0.265875
		CDK1	CALD1	S789	NetworKIN	1.64678		CDK1	CALD1	S789	NetworKIN	2.35407		CDK1	CALD1	S789	NetworKIN	0.934563		CDK1	CALD1	S789	NetworKIN	2.08147
		CDK1	EPS15	S814	NetworKIN	0.312524		CDK1	EPS15	S814	NetworKIN	0.477345		CDK1	EPS15	S814	NetworKIN	0.142686		CDK1	EPS15	S814	NetworKIN	0.453879
		CDK1	MAP4	S825	NetworKIN	-0.363789		CDK1	MAP4	S825	NetworKIN	0.165191		CDK1	MAP4	S825	NetworKIN	-0.959445		CDK1	MAP4	S825	NetworKIN	0.554977
		CDK1	HNRNPD	S83	NetworKIN	-0.223829		CDK1	HNRNPD	S83	NetworKIN	-0.300361		CDK1	HNRNPD	S83	NetworKIN	-0.154671		CDK1	HNRNPD	S83	NetworKIN	-0.0552157
		CDK1	UBA1	S835	NetworKIN	0.0750986		CDK1	UBA1	S835	NetworKIN	0.0549653		CDK1	UBA1	S835	NetworKIN	0.0139483		CDK1	UBA1	S835	NetworKIN	0.132072
		CDK1	NES	S842	NetworKIN	0.204715		CDK1	NES	S842	NetworKIN	0.74931		CDK1	NES	S842	NetworKIN	-0.153734		CDK1	NES	S842	NetworKIN	0.0721908
		CDK1	NUP107	S86	NetworKIN	0.857685		CDK1	NUP107	S86	NetworKIN	0.306647		CDK1	NUP107	S86	NetworKIN	0.431826		CDK1	NUP107	S86	NetworKIN	0.273537
		CDK1	RBM10	S89	NetworKIN	-0.113593		CDK1	RBM10	S89	NetworKIN	0.0079138		CDK1	RBM10	S89	NetworKIN	-0.0728676		CDK1	RBM10	S89	NetworKIN	0.067751
		CDK1	GTF3C2	S901	NetworKIN	-0.0609629		CDK1	GTF3C2	S901	NetworKIN	-0.0825524		CDK1	GTF3C2	S901	NetworKIN	-0.155596		CDK1	GTF3C2	S901	NetworKIN	-0.0487029
		CDK1	IL16	S922	NetworKIN	-0.285787		CDK1	IL16	S922	NetworKIN	0.15307		CDK1	IL16	S922	NetworKIN	0.266674		CDK1	IL16	S922	NetworKIN	-0.0335899
		CDK1	EIF4B	S93	NetworKIN	0.00106205		CDK1	EIF4B	S93	NetworKIN	0.192274		CDK1	EIF4B	S93	NetworKIN	-0.165699		CDK1	EIF4B	S93	NetworKIN	0.224202
		CDK1	NCOR2	S939	NetworKIN	0.107379		CDK1	NCOR2	S939	NetworKIN	0.373819		CDK1	NCOR2	S939	NetworKIN	0.0828896		CDK1	NCOR2	S939	NetworKIN	0.306654
		CDK1	AR	S96	NetworKIN	-0.106137		CDK1	AR	S96	NetworKIN	0.440784		CDK1	AR	S96	NetworKIN	-0.529494		CDK1	AR	S96	NetworKIN	-0.505363
		CDK1	MAP1B	T1067	NetworKIN	-0.02448		CDK1	MAP1B	T1067	NetworKIN	0.0925014		CDK1	MAP1B	T1067	NetworKIN	-0.400795		CDK1	MAP1B	T1067	NetworKIN	0.107702
		CDK1	RANBP2	T1396	NetworKIN	-0.0805312		CDK1	RANBP2	T1396	NetworKIN	0.0640901		CDK1	RANBP2	T1396	NetworKIN	-0.413953		CDK1	RANBP2	T1396	NetworKIN	0.0651634
		CDK1	MARCKS	T150	NetworKIN	-0.899893		CDK1	MARCKS	T150	NetworKIN	-0.784379		CDK1	MARCKS	T150	NetworKIN	-0.633538		CDK1	MARCKS	T150	NetworKIN	-0.27433
		CDK1	TMPO	T160	NetworKIN	-0.127964		CDK1	TMPO	T160	NetworKIN	-0.146009		CDK1	TMPO	T160	NetworKIN	-0.161624		CDK1	TMPO	T160	NetworKIN	0.0972204
		CDK1	MAP2	T1605	NetworKIN	-0.0210523		CDK1	MAP2	T1605	NetworKIN	0.254		CDK1	MAP2	T1605	NetworKIN	0.07155		CDK1	MAP2	T1605	NetworKIN	0.0483895
		CDK1	MAP1B	T1788	NetworKIN	-0.602114		CDK1	MAP1B	T1788	NetworKIN	-0.211821		CDK1	MAP1B	T1788	NetworKIN	-0.255647		CDK1	MAP1B	T1788	NetworKIN	-0.512466
		CDK1	NUCKS1	T179	NetworKIN	0.263761		CDK1	NUCKS1	T179	NetworKIN	0.612622		CDK1	NUCKS1	T179	NetworKIN	-0.0129962		CDK1	NUCKS1	T179	NetworKIN	0.3381
		CDK1	NUCKS1	T202	NetworKIN	0.0134242		CDK1	NUCKS1	T202	NetworKIN	-0.0405779		CDK1	NUCKS1	T202	NetworKIN	0.143048		CDK1	NUCKS1	T202	NetworKIN	-0.0989795
		CDK1	MEPCE	T213	NetworKIN	-0.227958		CDK1	MEPCE	T213	NetworKIN	-0.0935555		CDK1	MEPCE	T213	NetworKIN	-0.161283		CDK1	MEPCE	T213	NetworKIN	-0.139998
		CDK1	GORASP1	T216	NetworKIN	-0.145891		CDK1	GORASP1	T216	NetworKIN	0.256298		CDK1	GORASP1	T216	NetworKIN	-0.167591		CDK1	GORASP1	T216	NetworKIN	0.0593563
		CDK1	GORASP2	T222	NetworKIN	0.251592		CDK1	GORASP2	T222	NetworKIN	0.698308		CDK1	GORASP2	T222	NetworKIN	-0.282407		CDK1	GORASP2	T222	NetworKIN	0.871519
		CDK1	TACC2	T2314	NetworKIN	-0.476781		CDK1	TACC2	T2314	NetworKIN	-0.440424		CDK1	TACC2	T2314	NetworKIN	-0.230776		CDK1	TACC2	T2314	NetworKIN	-0.0297747
		CDK1	ACTN2	T237	NetworKIN	0.010162		CDK1	ACTN2	T237	NetworKIN	0.244577		CDK1	ACTN2	T237	NetworKIN	0.0138457		CDK1	ACTN2	T237	NetworKIN	0.354998
		CDK1	TNKS1BP1	T239	NetworKIN	0.600251		CDK1	TNKS1BP1	T239	NetworKIN	0.358293		CDK1	TNKS1BP1	T239	NetworKIN	0.633184		CDK1	TNKS1BP1	T239	NetworKIN	0.691905
		CDK1	ARAF	T253	NetworKIN	-0.648251		CDK1	ARAF	T253	NetworKIN	-0.849796		CDK1	ARAF	T253	NetworKIN	0.110259		CDK1	ARAF	T253	NetworKIN	0.0520007
		CDK1	SUGT1	T265	NetworKIN	0.539008		CDK1	SUGT1	T265	NetworKIN	1.20601		CDK1	SUGT1	T265	NetworKIN	0.0625444		CDK1	SUGT1	T265	NetworKIN	1.17773
		CDK1	PSMD1	T273	NetworKIN	-0.232877		CDK1	PSMD1	T273	NetworKIN	0.0593363		CDK1	PSMD1	T273	NetworKIN	-0.325992		CDK1	PSMD1	T273	NetworKIN	0.749118
		CDK1	ZBTB16	T282	NetworKIN	0.238196		CDK1	ZBTB16	T282	NetworKIN	0.200463		CDK1	ZBTB16	T282	NetworKIN	-0.0242142		CDK1	ZBTB16	T282	NetworKIN	0.531591
		CDK1	BAG3	T285	NetworKIN	-0.507308		CDK1	BAG3	T285	NetworKIN	-0.867168		CDK1	BAG3	T285	NetworKIN	0.120976		CDK1	BAG3	T285	NetworKIN	-0.188177
		CDK1	SPAST	T303	NetworKIN	-1.14685		CDK1	SPAST	T303	NetworKIN	-1.78669		CDK1	SPAST	T303	NetworKIN	-0.770368		CDK1	SPAST	T303	NetworKIN	-0.823628
		CDK1	PSMD1	T311	NetworKIN	-0.0976247		CDK1	PSMD1	T311	NetworKIN	0.141147		CDK1	PSMD1	T311	NetworKIN	-0.182621		CDK1	PSMD1	T311	NetworKIN	0.540635
		CDK1	PPP1CB	T316	NetworKIN	0.0510734		CDK1	PPP1CB	T316	NetworKIN	0.000602701		CDK1	PPP1CB	T316	NetworKIN	-0.283804		CDK1	PPP1CB	T316	NetworKIN	-0.148747
		CDK1	GTF2F1	T331	NetworKIN	-0.253168		CDK1	GTF2F1	T331	NetworKIN	0.150849		CDK1	GTF2F1	T331	NetworKIN	-0.0530455		CDK1	GTF2F1	T331	NetworKIN	0.297757
		CDK1	MAPKAPK2	T334	NetworKIN	-0.301972		CDK1	MAPKAPK2	T334	NetworKIN	-0.00751728		CDK1	MAPKAPK2	T334	NetworKIN	-0.273043		CDK1	MAPKAPK2	T334	NetworKIN	-0.271425
		CDK1	RPS6KA3	T365	NetworKIN	0.384651		CDK1	RPS6KA3	T365	NetworKIN	0.376894		CDK1	RPS6KA3	T365	NetworKIN	0.194013		CDK1	RPS6KA3	T365	NetworKIN	0.0897411
		CDK1	EPS15L1	T366	NetworKIN	-0.186275		CDK1	EPS15L1	T366	NetworKIN	-0.0114147		CDK1	EPS15L1	T366	NetworKIN	-0.265632		CDK1	EPS15L1	T366	NetworKIN	-0.0268549
		CDK1	MKNK1	T385	NetworKIN	1.00942		CDK1	MKNK1	T385	NetworKIN	0.729071		CDK1	MKNK1	T385	NetworKIN	0.257084		CDK1	MKNK1	T385	NetworKIN	0.641762
		CDK1	BAG3	T406	NetworKIN	-0.363751		CDK1	BAG3	T406	NetworKIN	-0.0648742		CDK1	BAG3	T406	NetworKIN	-0.572057		CDK1	BAG3	T406	NetworKIN	-0.576266
		CDK1	GORASP2	T433	NetworKIN	-0.0237167		CDK1	GORASP2	T433	NetworKIN	0.268604		CDK1	GORASP2	T433	NetworKIN	-0.328621		CDK1	GORASP2	T433	NetworKIN	0.636985
		CDK1	NUP214	T437	NetworKIN	0.640164		CDK1	NUP214	T437	NetworKIN	1.08743		CDK1	NUP214	T437	NetworKIN	0.165608		CDK1	NUP214	T437	NetworKIN	0.391044
		CDK1	AKT2	T451	NetworKIN	-0.233226		CDK1	AKT2	T451	NetworKIN	-0.000166238		CDK1	AKT2	T451	NetworKIN	-0.287194		CDK1	AKT2	T451	NetworKIN	-0.063267
		CDK1	XRCC1	T453	NetworKIN	0.133456		CDK1	XRCC1	T453	NetworKIN	0.467319		CDK1	XRCC1	T453	NetworKIN	0.223562		CDK1	XRCC1	T453	NetworKIN	0.120296
		CDK1	EPB41L1	T475	NetworKIN	0.612643		CDK1	EPB41L1	T475	NetworKIN	1.1104		CDK1	EPB41L1	T475	NetworKIN	0.134171		CDK1	EPB41L1	T475	NetworKIN	0.77555
		CDK1	ZCCHC8	T479	NetworKIN	0.0629652		CDK1	ZCCHC8	T479	NetworKIN	0.219212		CDK1	ZCCHC8	T479	NetworKIN	-0.388664		CDK1	ZCCHC8	T479	NetworKIN	0.193413
		CDK1	PACS1	T504	NetworKIN	-0.151916		CDK1	PACS1	T504	NetworKIN	-0.507584		CDK1	PACS1	T504	NetworKIN	-0.235602		CDK1	PACS1	T504	NetworKIN	0.0726443
		CDK1	DYNC1LI1	T513	NetworKIN	0.136823		CDK1	DYNC1LI1	T513	NetworKIN	0.330164		CDK1	DYNC1LI1	T513	NetworKIN	-0.20376		CDK1	DYNC1LI1	T513	NetworKIN	0.641438
		CDK1	MAP4	T521	NetworKIN	-0.222892		CDK1	MAP4	T521	NetworKIN	0.0461727		CDK1	MAP4	T521	NetworKIN	-0.271919		CDK1	MAP4	T521	NetworKIN	0.282082
		CDK1	PRKAR2A	T54	NetworKIN	-0.0859097		CDK1	PRKAR2A	T54	NetworKIN	-0.0331573		CDK1	PRKAR2A	T54	NetworKIN	-0.11137		CDK1	PRKAR2A	T54	NetworKIN	-0.0886254
		CDK1	TRIM28	T541	NetworKIN	0.00350469		CDK1	TRIM28	T541	NetworKIN	0.373144		CDK1	TRIM28	T541	NetworKIN	-0.168896		CDK1	TRIM28	T541	NetworKIN	0.278561
		CDK1	MAP1S	T638	NetworKIN	0.376234		CDK1	MAP1S	T638	NetworKIN	-0.0104955		CDK1	MAP1S	T638	NetworKIN	0.294593		CDK1	MAP1S	T638	NetworKIN	-0.067418
		CDK1	NUP214	T670	NetworKIN	0.647937		CDK1	NUP214	T670	NetworKIN	0.24716		CDK1	NUP214	T670	NetworKIN	0.375533		CDK1	NUP214	T670	NetworKIN	0.245195
		CDK1	CLASP1	T711	NetworKIN	-0.150301		CDK1	CLASP1	T711	NetworKIN	-0.368128		CDK1	CLASP1	T711	NetworKIN	-0.207179		CDK1	CLASP1	T711	NetworKIN	0.210008
		CDK1	STAT3	T714	NetworKIN	0.271959		CDK1	STAT3	T714	NetworKIN	0.311242		CDK1	STAT3	T714	NetworKIN	0.00649104		CDK1	STAT3	T714	NetworKIN	0.329026
		CDK1	TMPO	T74	NetworKIN	-0.10827		CDK1	TMPO	T74	NetworKIN	-0.151273		CDK1	TMPO	T74	NetworKIN	-0.162679		CDK1	TMPO	T74	NetworKIN	-0.160172
		CDK1	EPS15	T777	NetworKIN	-0.144791		CDK1	EPS15	T777	NetworKIN	0.412355		CDK1	EPS15	T777	NetworKIN	-0.488348		CDK1	EPS15	T777	NetworKIN	0.02887
		CDK1	MARCKSL1	T85	NetworKIN	-0.353803		CDK1	MARCKSL1	T85	NetworKIN	-0.0931602		CDK1	MARCKSL1	T85	NetworKIN	-0.174873		CDK1	MARCKSL1	T85	NetworKIN	-0.218599
		CDK1	DYNC1I2	T95	NetworKIN	-0.28441		CDK1	DYNC1I2	T95	NetworKIN	-0.0690465		CDK1	DYNC1I2	T95	NetworKIN	-0.30675		CDK1	DYNC1I2	T95	NetworKIN	0.0837764
		CDK2	CDKN1B	S10	NetworKIN	-0.569669		CDK2	CDKN1B	S10	NetworKIN	-0.469392		CDK2	CDKN1B	S10	NetworKIN	-0.335243		CDK2	CDKN1B	S10	NetworKIN	-0.187349
		CDK2	SOS1	S1082	NetworKIN	-0.0175512		CDK2	SOS1	S1082	NetworKIN	-0.0770498		CDK2	SOS1	S1082	NetworKIN	0.0465325		CDK2	SOS1	S1082	NetworKIN	-0.082933
		CDK2	BRD4	S1117	NetworKIN	-0.62073		CDK2	BRD4	S1117	NetworKIN	-0.452646		CDK2	BRD4	S1117	NetworKIN	-0.568698		CDK2	BRD4	S1117	NetworKIN	-0.16985
		CDK2	MED1	S1156	NetworKIN	-0.579775		CDK2	MED1	S1156	NetworKIN	0.011685		CDK2	MED1	S1156	NetworKIN	-0.620119		CDK2	MED1	S1156	NetworKIN	-0.302582
		CDK2	BRAP	S117	NetworKIN	-0.112438		CDK2	BRAP	S117	NetworKIN	0.0667281		CDK2	BRAP	S117	NetworKIN	-0.168931		CDK2	BRAP	S117	NetworKIN	0.109784
		CDK2	RBBP6	S1179	NetworKIN	-0.275988		CDK2	RBBP6	S1179	NetworKIN	-0.0345099		CDK2	RBBP6	S1179	NetworKIN	-0.182056		CDK2	RBBP6	S1179	NetworKIN	-0.112825
		CDK2	SMARCA2	S1377	NetworKIN	-0.0144591		CDK2	SMARCA2	S1377	NetworKIN	-0.00329972		CDK2	SMARCA2	S1377	NetworKIN	-0.0690627		CDK2	SMARCA2	S1377	NetworKIN	-0.0845957
		CDK2	TSC2	S1411	NetworKIN	-0.217834		CDK2	TSC2	S1411	NetworKIN	-0.248077		CDK2	TSC2	S1411	NetworKIN	-0.295882		CDK2	TSC2	S1411	NetworKIN	-0.173069
		CDK2	PSMF1	S152	NetworKIN	0.288464		CDK2	PSMF1	S152	NetworKIN	0.382715		CDK2	PSMF1	S152	NetworKIN	0.719809		CDK2	PSMF1	S152	NetworKIN	0.189053
		CDK2	PSMF1	S153	NetworKIN	0.752952		CDK2	PSMF1	S153	NetworKIN	0.831003		CDK2	PSMF1	S153	NetworKIN	0.243074		CDK2	PSMF1	S153	NetworKIN	0.639425
		CDK2	PSMD2	S16	NetworKIN	-0.10669		CDK2	PSMD2	S16	NetworKIN	-0.00486852		CDK2	PSMD2	S16	NetworKIN	-0.179518		CDK2	PSMD2	S16	NetworKIN	0.813721
		CDK2	WEE1	S165	NetworKIN	-0.142425		CDK2	WEE1	S165	NetworKIN	0.109062		CDK2	WEE1	S165	NetworKIN	-0.34358		CDK2	WEE1	S165	NetworKIN	-0.199041
		CDK2	IRF3	S173	NetworKIN	-0.448969		CDK2	IRF3	S173	NetworKIN	-0.165287		CDK2	IRF3	S173	NetworKIN	-0.113078		CDK2	IRF3	S173	NetworKIN	-0.367672
		CDK2	CDKN1B	S178	NetworKIN	-0.452264		CDK2	CDKN1B	S178	NetworKIN	0.0206536		CDK2	CDKN1B	S178	NetworKIN	-0.316603		CDK2	CDKN1B	S178	NetworKIN	-0.18725
		CDK2	SRF	S224	NetworKIN	-0.247709		CDK2	SRF	S224	NetworKIN	-0.154689		CDK2	SRF	S224	NetworKIN	-0.152396		CDK2	SRF	S224	NetworKIN	0.0346707
		CDK2	LMNB1	S23	NetworKIN	0.434463		CDK2	LMNB1	S23	NetworKIN	0.0825733		CDK2	LMNB1	S23	NetworKIN	0.214462		CDK2	LMNB1	S23	NetworKIN	0.378816
		CDK2	FOXO1	S287	NetworKIN	-0.188767		CDK2	FOXO1	S287	NetworKIN	-0.208214		CDK2	FOXO1	S287	NetworKIN	-0.186232		CDK2	FOXO1	S287	NetworKIN	-0.0577884
		CDK2	PSMD1	S315	NetworKIN	0.250178		CDK2	PSMD1	S315	NetworKIN	0.400634		CDK2	PSMD1	S315	NetworKIN	0.113167		CDK2	PSMD1	S315	NetworKIN	0.349792
		CDK2	ZC3HC1	S321	NetworKIN	0.671834		CDK2	ZC3HC1	S321	NetworKIN	0.511088		CDK2	ZC3HC1	S321	NetworKIN	0.148824		CDK2	ZC3HC1	S321	NetworKIN	0.502746
		CDK2	NFYA	S326	NetworKIN	-0.147672		CDK2	NFYA	S326	NetworKIN	-0.0803995		CDK2	NFYA	S326	NetworKIN	0.113108		CDK2	NFYA	S326	NetworKIN	-0.171767
		CDK2	SMARCA2	S329	NetworKIN	0.292932		CDK2	SMARCA2	S329	NetworKIN	0.155661		CDK2	SMARCA2	S329	NetworKIN	0.145861		CDK2	SMARCA2	S329	NetworKIN	0.0952364
		CDK2	BCL6	S333	NetworKIN	0.0104938		CDK2	BCL6	S333	NetworKIN	0.275843		CDK2	BCL6	S333	NetworKIN	-0.00788288		CDK2	BCL6	S333	NetworKIN	-0.0539751
		CDK2	RANBP3	S333	NetworKIN	0.0153916		CDK2	RANBP3	S333	NetworKIN	-0.154124		CDK2	RANBP3	S333	NetworKIN	0.0382868		CDK2	RANBP3	S333	NetworKIN	0.125626
		CDK2	CCNK	S340	NetworKIN	-0.127687		CDK2	CCNK	S340	NetworKIN	-0.175936		CDK2	CCNK	S340	NetworKIN	-0.173881		CDK2	CCNK	S340	NetworKIN	-0.0947292
		CDK2	SORBS1	S350	NetworKIN	0.519758		CDK2	SORBS1	S350	NetworKIN	0.212441		CDK2	SORBS1	S350	NetworKIN	0.416039		CDK2	SORBS1	S350	NetworKIN	0.578795
		CDK2	MEF2C	S396	NetworKIN	-0.241117		CDK2	MEF2C	S396	NetworKIN	0.191972		CDK2	MEF2C	S396	NetworKIN	-0.00585899		CDK2	MEF2C	S396	NetworKIN	-0.0480779
		CDK2	CHAF1B	S410	NetworKIN	0.470534		CDK2	CHAF1B	S410	NetworKIN	0.0974261		CDK2	CHAF1B	S410	NetworKIN	0.267125		CDK2	CHAF1B	S410	NetworKIN	0.213703
		CDK2	USP20	S413	NetworKIN	-0.4092		CDK2	USP20	S413	NetworKIN	-0.250582		CDK2	USP20	S413	NetworKIN	-0.206005		CDK2	USP20	S413	NetworKIN	-0.10463
		CDK2	MEF2D	S444	NetworKIN	0.450028		CDK2	MEF2D	S444	NetworKIN	0.0920807		CDK2	MEF2D	S444	NetworKIN	0.0422429		CDK2	MEF2D	S444	NetworKIN	0.357771
		CDK2	XRCC1	S447	NetworKIN	-0.0612322		CDK2	XRCC1	S447	NetworKIN	0.0226039		CDK2	XRCC1	S447	NetworKIN	-0.385911		CDK2	XRCC1	S447	NetworKIN	0.0163798
		CDK2	SORBS1	S472	NetworKIN	0.701734		CDK2	SORBS1	S472	NetworKIN	0.731721		CDK2	SORBS1	S472	NetworKIN	0.159385		CDK2	SORBS1	S472	NetworKIN	0.539355
		CDK2	CCNT2	S480	NetworKIN	-0.397176		CDK2	CCNT2	S480	NetworKIN	-0.0592113		CDK2	CCNT2	S480	NetworKIN	-0.233589		CDK2	CCNT2	S480	NetworKIN	0.111155
		CDK2	PIAS1	S503	NetworKIN	-0.310405		CDK2	PIAS1	S503	NetworKIN	-0.0253844		CDK2	PIAS1	S503	NetworKIN	-0.187582		CDK2	PIAS1	S503	NetworKIN	-0.18809
		CDK2	PML	S527	NetworKIN	0.00171496		CDK2	PML	S527	NetworKIN	-0.0190058		CDK2	PML	S527	NetworKIN	0.0493263		CDK2	PML	S527	NetworKIN	0.0324348
		CDK2	SORBS1	S556	NetworKIN	-0.0405229		CDK2	SORBS1	S556	NetworKIN	-0.131697		CDK2	SORBS1	S556	NetworKIN	-0.083018		CDK2	SORBS1	S556	NetworKIN	0.579392
		CDK2	PSMA5	S56	NetworKIN	0.0561409		CDK2	PSMA5	S56	NetworKIN	0.802859		CDK2	PSMA5	S56	NetworKIN	-0.149377		CDK2	PSMA5	S56	NetworKIN	0.480335
		CDK2	NCL	S563	NetworKIN	-0.0271361		CDK2	NCL	S563	NetworKIN	-0.308696		CDK2	NCL	S563	NetworKIN	0.382671		CDK2	NCL	S563	NetworKIN	0.552402
		CDK2	IRS1	S636	NetworKIN	-0.0857303		CDK2	IRS1	S636	NetworKIN	-0.141597		CDK2	IRS1	S636	NetworKIN	-0.230654		CDK2	IRS1	S636	NetworKIN	0.310924
		CDK2	RRN3	S640	NetworKIN	-0.0435103		CDK2	RRN3	S640	NetworKIN	0.289866		CDK2	RRN3	S640	NetworKIN	-0.0559514		CDK2	RRN3	S640	NetworKIN	0.319383
		CDK2	ANAPC1	S688	NetworKIN	-0.0977264		CDK2	ANAPC1	S688	NetworKIN	0.13834		CDK2	ANAPC1	S688	NetworKIN	-0.24548		CDK2	ANAPC1	S688	NetworKIN	0.196065
		CDK2	STAT3	S727	NetworKIN	0.339506		CDK2	STAT3	S727	NetworKIN	0.186147		CDK2	STAT3	S727	NetworKIN	-0.0331908		CDK2	STAT3	S727	NetworKIN	0.114411
		CDK2	PML	S8	NetworKIN	-0.519088		CDK2	PML	S8	NetworKIN	-0.130682		CDK2	PML	S8	NetworKIN	-0.655901		CDK2	PML	S8	NetworKIN	-0.372531
		CDK2	COPB2	S859	NetworKIN	-0.22502		CDK2	COPB2	S859	NetworKIN	-0.160823		CDK2	COPB2	S859	NetworKIN	-0.456426		CDK2	COPB2	S859	NetworKIN	-0.0903596
		CDK2	SORBS1	S89	NetworKIN	1.21551		CDK2	SORBS1	S89	NetworKIN	1.07586		CDK2	SORBS1	S89	NetworKIN	0.443127		CDK2	SORBS1	S89	NetworKIN	1.02522
		CDK2	NCOR2	S939	NetworKIN	0.107379		CDK2	NCOR2	S939	NetworKIN	0.373819		CDK2	NCOR2	S939	NetworKIN	0.0828896		CDK2	NCOR2	S939	NetworKIN	0.306654
		CDK2	SORBS1	S945	NetworKIN	0.2954		CDK2	SORBS1	S945	NetworKIN	0.0947032		CDK2	SORBS1	S945	NetworKIN	-0.332377		CDK2	SORBS1	S945	NetworKIN	-0.0207965
		CDK2	AR	S96	NetworKIN	-0.106137		CDK2	AR	S96	NetworKIN	0.440784		CDK2	AR	S96	NetworKIN	-0.529494		CDK2	AR	S96	NetworKIN	-0.505363
		CDK2	PSMD1	T273	NetworKIN	-0.232877		CDK2	PSMD1	T273	NetworKIN	0.0593363		CDK2	PSMD1	T273	NetworKIN	-0.325992		CDK2	PSMD1	T273	NetworKIN	0.749118
		CDK2	NGFR	T293	NetworKIN	-0.394566		CDK2	NGFR	T293	NetworKIN	-0.349327		CDK2	NGFR	T293	NetworKIN	-0.769933		CDK2	NGFR	T293	NetworKIN	-0.20237
		CDK2	PSMD1	T311	NetworKIN	-0.0976247		CDK2	PSMD1	T311	NetworKIN	0.141147		CDK2	PSMD1	T311	NetworKIN	-0.182621		CDK2	PSMD1	T311	NetworKIN	0.540635
		CDK2	GTF2F1	T331	NetworKIN	-0.253168		CDK2	GTF2F1	T331	NetworKIN	0.150849		CDK2	GTF2F1	T331	NetworKIN	-0.0530455		CDK2	GTF2F1	T331	NetworKIN	0.297757
		CDK2	MAPKAPK2	T334	NetworKIN	-0.301972		CDK2	MAPKAPK2	T334	NetworKIN	-0.00751728		CDK2	MAPKAPK2	T334	NetworKIN	-0.273043		CDK2	MAPKAPK2	T334	NetworKIN	-0.271425
		CDK2	AKT2	T451	NetworKIN	-0.233226		CDK2	AKT2	T451	NetworKIN	-0.000166238		CDK2	AKT2	T451	NetworKIN	-0.287194		CDK2	AKT2	T451	NetworKIN	-0.063267
		CDK2	STAT3	T714	NetworKIN	0.271959		CDK2	STAT3	T714	NetworKIN	0.311242		CDK2	STAT3	T714	NetworKIN	0.00649104		CDK2	STAT3	T714	NetworKIN	0.329026
		CDK2	SORBS1	T82	NetworKIN	0.49422		CDK2	SORBS1	T82	NetworKIN	-0.143863		CDK2	SORBS1	T82	NetworKIN	0.626354		CDK2	SORBS1	T82	NetworKIN	0.943636
		CDK2	COPB2	T861	NetworKIN	-0.316596		CDK2	COPB2	T861	NetworKIN	-0.028443		CDK2	COPB2	T861	NetworKIN	-0.436662		CDK2	COPB2	T861	NetworKIN	0.0956302
		CDK3	CDKN1B	S10	NetworKIN	-0.569669		CDK3	CDKN1B	S10	NetworKIN	-0.469392		CDK3	CDKN1B	S10	NetworKIN	-0.335243		CDK3	CDKN1B	S10	NetworKIN	-0.187349
		CDK3	CDKN1B	S178	NetworKIN	-0.452264		CDK3	CDKN1B	S178	NetworKIN	0.0206536		CDK3	CDKN1B	S178	NetworKIN	-0.316603		CDK3	CDKN1B	S178	NetworKIN	-0.18725
		CDK3	CCNK	S340	NetworKIN	-0.127687		CDK3	CCNK	S340	NetworKIN	-0.175936		CDK3	CCNK	S340	NetworKIN	-0.173881		CDK3	CCNK	S340	NetworKIN	-0.0947292
		CDK4	SMC3	S1067	NetworKIN	-0.202079		CDK4	SMC3	S1067	NetworKIN	-0.181114		CDK4	SMC3	S1067	NetworKIN	-0.288473		CDK4	SMC3	S1067	NetworKIN	-0.360841
		CDK4	PSMD11	S14	NetworKIN	-1.46137		CDK4	PSMD11	S14	NetworKIN	-0.494044		CDK4	PSMD11	S14	NetworKIN	-1.06536		CDK4	PSMD11	S14	NetworKIN	-1.12685
		CDK4	PSMD2	S16	NetworKIN	-0.10669		CDK4	PSMD2	S16	NetworKIN	-0.00486852		CDK4	PSMD2	S16	NetworKIN	-0.179518		CDK4	PSMD2	S16	NetworKIN	0.813721
		CDK4	RAD23B	S160	NetworKIN	0.807596		CDK4	RAD23B	S160	NetworKIN	1.37605		CDK4	RAD23B	S160	NetworKIN	-0.0910394		CDK4	RAD23B	S160	NetworKIN	1.79461
		CDK4	TJP1	S1619	NetworKIN	0.623763		CDK4	TJP1	S1619	NetworKIN	0.496678		CDK4	TJP1	S1619	NetworKIN	0.426843		CDK4	TJP1	S1619	NetworKIN	0.211631
		CDK4	MEF2D	S251	NetworKIN	-0.166393		CDK4	MEF2D	S251	NetworKIN	0.187161		CDK4	MEF2D	S251	NetworKIN	0.172716		CDK4	MEF2D	S251	NetworKIN	0.148333
		CDK4	SIRT1	S27	NetworKIN	-0.0920039		CDK4	SIRT1	S27	NetworKIN	-0.0314975		CDK4	SIRT1	S27	NetworKIN	-0.0931311		CDK4	SIRT1	S27	NetworKIN	-0.0496328
		CDK4	CCNT2	S480	NetworKIN	-0.397176		CDK4	CCNT2	S480	NetworKIN	-0.0592113		CDK4	CCNT2	S480	NetworKIN	-0.233589		CDK4	CCNT2	S480	NetworKIN	0.111155
		CDK4	TSC1	S505	NetworKIN	-0.0957961		CDK4	TSC1	S505	NetworKIN	-0.303977		CDK4	TSC1	S505	NetworKIN	0.107126		CDK4	TSC1	S505	NetworKIN	0.290712
		CDK4	RBL2	S639	NetworKIN	-0.464092		CDK4	RBL2	S639	NetworKIN	0.205596		CDK4	RBL2	S639	NetworKIN	-0.00732032		CDK4	RBL2	S639	NetworKIN	-0.00606948
		CDK4	PARP1	S782	NetworKIN	0.55616		CDK4	PARP1	S782	NetworKIN	0.296943		CDK4	PARP1	S782	NetworKIN	0.365682		CDK4	PARP1	S782	NetworKIN	0.210788
		CDK4	RAD23B	T155	NetworKIN	0.533252		CDK4	RAD23B	T155	NetworKIN	1.47777		CDK4	RAD23B	T155	NetworKIN	-0.3734		CDK4	RAD23B	T155	NetworKIN	1.05188
		CDK4	CDK7	T170	NetworKIN	-0.194787		CDK4	CDK7	T170	NetworKIN	0.0453446		CDK4	CDK7	T170	NetworKIN	-0.117108		CDK4	CDK7	T170	NetworKIN	-0.0386605
		CDK4	PSMD1	T273	NetworKIN	-0.232877		CDK4	PSMD1	T273	NetworKIN	0.0593363		CDK4	PSMD1	T273	NetworKIN	-0.325992		CDK4	PSMD1	T273	NetworKIN	0.749118
		CDK4	EIF4EBP1	T37	NetworKIN	0.0573973		CDK4	EIF4EBP1	T37	NetworKIN	0.147867		CDK4	EIF4EBP1	T37	NetworKIN	0.123695		CDK4	EIF4EBP1	T37	NetworKIN	0.338825
		CDK4	EIF4EBP1	T41	NetworKIN	-1.06096		CDK4	EIF4EBP1	T41	NetworKIN	-0.627792		CDK4	EIF4EBP1	T41	NetworKIN	-0.108944		CDK4	EIF4EBP1	T41	NetworKIN	-0.250171
		CDK4	EIF4EBP1	T46	NetworKIN	-0.500107		CDK4	EIF4EBP1	T46	NetworKIN	-0.257663		CDK4	EIF4EBP1	T46	NetworKIN	-0.49331		CDK4	EIF4EBP1	T46	NetworKIN	-0.250636
		CDK4	TAF12	T59	NetworKIN	-0.238881		CDK4	TAF12	T59	NetworKIN	-0.0844108		CDK4	TAF12	T59	NetworKIN	-0.498849		CDK4	TAF12	T59	NetworKIN	-0.18926
		CDK5	CDKN1B	S10	NetworKIN	-0.569669		CDK5	CDKN1B	S10	NetworKIN	-0.469392		CDK5	CDKN1B	S10	NetworKIN	-0.335243		CDK5	CDKN1B	S10	NetworKIN	-0.187349
		CDK5	CRKL	S107	NetworKIN	-0.364823		CDK5	CRKL	S107	NetworKIN	-0.0230303		CDK5	CRKL	S107	NetworKIN	-0.463719		CDK5	CRKL	S107	NetworKIN	0.0472695
		CDK5	CLASP1	S1091	NetworKIN	-0.316505		CDK5	CLASP1	S1091	NetworKIN	-0.215312		CDK5	CLASP1	S1091	NetworKIN	-0.277838		CDK5	CLASP1	S1091	NetworKIN	0.1171
		CDK5	NUP160	S1157	NetworKIN	0.0132858		CDK5	NUP160	S1157	NetworKIN	-0.0439843		CDK5	NUP160	S1157	NetworKIN	-0.161587		CDK5	NUP160	S1157	NetworKIN	0.00641859
		CDK5	AKT1	S124	NetworKIN	-0.195004		CDK5	AKT1	S124	NetworKIN	-0.0287572		CDK5	AKT1	S124	NetworKIN	-0.199384		CDK5	AKT1	S124	NetworKIN	0.219376
		CDK5	MAP1B	S1256	NetworKIN	0.109832		CDK5	MAP1B	S1256	NetworKIN	0.453652		CDK5	MAP1B	S1256	NetworKIN	0.144163		CDK5	MAP1B	S1256	NetworKIN	0.18723
		CDK5	MAP1B	S1265	NetworKIN	-0.0980546		CDK5	MAP1B	S1265	NetworKIN	0.145732		CDK5	MAP1B	S1265	NetworKIN	-0.0287158		CDK5	MAP1B	S1265	NetworKIN	0.248489
		CDK5	MAP2	S1347	NetworKIN	0.350648		CDK5	MAP2	S1347	NetworKIN	0.405267		CDK5	MAP2	S1347	NetworKIN	0.0990661		CDK5	MAP2	S1347	NetworKIN	0.187795
		CDK5	MAP1B	S1400	NetworKIN	0.417992		CDK5	MAP1B	S1400	NetworKIN	0.481615		CDK5	MAP1B	S1400	NetworKIN	0.475402		CDK5	MAP1B	S1400	NetworKIN	0.76204
		CDK5	MAP1B	S1427	NetworKIN	-0.0730376		CDK5	MAP1B	S1427	NetworKIN	-0.484009		CDK5	MAP1B	S1427	NetworKIN	0.126065		CDK5	MAP1B	S1427	NetworKIN	0.145225
		CDK5	MAP1B	S1438	NetworKIN	-0.497654		CDK5	MAP1B	S1438	NetworKIN	0.0285366		CDK5	MAP1B	S1438	NetworKIN	-0.291281		CDK5	MAP1B	S1438	NetworKIN	0.0448723
		CDK5	RTN4	S15	NetworKIN	-0.138254		CDK5	RTN4	S15	NetworKIN	-0.0227299		CDK5	RTN4	S15	NetworKIN	-0.17909		CDK5	RTN4	S15	NetworKIN	0.0888419
		CDK5	MYEF2	S17	NetworKIN	-0.205795		CDK5	MYEF2	S17	NetworKIN	0.116267		CDK5	MYEF2	S17	NetworKIN	-0.326211		CDK5	MYEF2	S17	NetworKIN	-0.0199868
		CDK5	KATNA1	S170	NetworKIN	-0.491523		CDK5	KATNA1	S170	NetworKIN	-0.0554773		CDK5	KATNA1	S170	NetworKIN	-0.535906		CDK5	KATNA1	S170	NetworKIN	-0.173411
		CDK5	MAP1B	S1779	NetworKIN	-0.021334		CDK5	MAP1B	S1779	NetworKIN	-0.194454		CDK5	MAP1B	S1779	NetworKIN	-0.329492		CDK5	MAP1B	S1779	NetworKIN	-0.11386
		CDK5	CDKN1B	S178	NetworKIN	-0.452264		CDK5	CDKN1B	S178	NetworKIN	0.0206536		CDK5	CDKN1B	S178	NetworKIN	-0.316603		CDK5	CDKN1B	S178	NetworKIN	-0.18725
		CDK5	MAP2	S1782	NetworKIN	-0.0161984		CDK5	MAP2	S1782	NetworKIN	0.0234749		CDK5	MAP2	S1782	NetworKIN	-0.171776		CDK5	MAP2	S1782	NetworKIN	0.116844
		CDK5	MAP1B	S1785	NetworKIN	0.0763027		CDK5	MAP1B	S1785	NetworKIN	0.104213		CDK5	MAP1B	S1785	NetworKIN	0.402777		CDK5	MAP1B	S1785	NetworKIN	0.0925036
		CDK5	MEF2D	S180	NetworKIN	0.170974		CDK5	MEF2D	S180	NetworKIN	0.141359		CDK5	MEF2D	S180	NetworKIN	-0.0209703		CDK5	MEF2D	S180	NetworKIN	0.161706
		CDK5	ABI1	S183	NetworKIN	0.0370371		CDK5	ABI1	S183	NetworKIN	0.0420772		CDK5	ABI1	S183	NetworKIN	-0.0210626		CDK5	ABI1	S183	NetworKIN	0.00121621
		CDK5	STUB1	S19	NetworKIN	-0.115241		CDK5	STUB1	S19	NetworKIN	0.0395462		CDK5	STUB1	S19	NetworKIN	-0.203448		CDK5	STUB1	S19	NetworKIN	-0.0717348
		CDK5	DYNC1LI1	S207	NetworKIN	0.363242		CDK5	DYNC1LI1	S207	NetworKIN	0.209981		CDK5	DYNC1LI1	S207	NetworKIN	0.186804		CDK5	DYNC1LI1	S207	NetworKIN	0.575205
		CDK5	MAP1B	S2098	NetworKIN	0.219194		CDK5	MAP1B	S2098	NetworKIN	0.305884		CDK5	MAP1B	S2098	NetworKIN	-0.0205365		CDK5	MAP1B	S2098	NetworKIN	0.336128
		CDK5	ABI1	S225	NetworKIN	-0.309101		CDK5	ABI1	S225	NetworKIN	-0.0499126		CDK5	ABI1	S225	NetworKIN	-0.327771		CDK5	ABI1	S225	NetworKIN	-0.0758478
		CDK5	STUB1	S23	NetworKIN	-0.18211		CDK5	STUB1	S23	NetworKIN	0.0408306		CDK5	STUB1	S23	NetworKIN	0.040463		CDK5	STUB1	S23	NetworKIN	-0.116389
		CDK5	MEF2D	S231	NetworKIN	0.176666		CDK5	MEF2D	S231	NetworKIN	-0.11279		CDK5	MEF2D	S231	NetworKIN	-0.153516		CDK5	MEF2D	S231	NetworKIN	0.0347634
		CDK5	MEF2D	S251	NetworKIN	-0.166393		CDK5	MEF2D	S251	NetworKIN	0.187161		CDK5	MEF2D	S251	NetworKIN	0.172716		CDK5	MEF2D	S251	NetworKIN	0.148333
		CDK5	APC	S2674	NetworKIN	0.0863284		CDK5	APC	S2674	NetworKIN	0.223757		CDK5	APC	S2674	NetworKIN	-0.00459946		CDK5	APC	S2674	NetworKIN	0.713875
		CDK5	MAP2	S285	NetworKIN	0.0828259		CDK5	MAP2	S285	NetworKIN	0.215856		CDK5	MAP2	S285	NetworKIN	-0.392944		CDK5	MAP2	S285	NetworKIN	0.238787
		CDK5	BIN1	S296	NetworKIN	-0.162023		CDK5	BIN1	S296	NetworKIN	-0.0258087		CDK5	BIN1	S296	NetworKIN	-0.134339		CDK5	BIN1	S296	NetworKIN	0.0238461
		CDK5	BIN1	S331	NetworKIN	0.0060707		CDK5	BIN1	S331	NetworKIN	0.0607774		CDK5	BIN1	S331	NetworKIN	-0.0375886		CDK5	BIN1	S331	NetworKIN	0.126837
		CDK5	CAMK2B	S367	NetworKIN	0.87854		CDK5	CAMK2B	S367	NetworKIN	0.918069		CDK5	CAMK2B	S367	NetworKIN	0.12342		CDK5	CAMK2B	S367	NetworKIN	1.88622
		CDK5	MEF2C	S396	NetworKIN	-0.241117		CDK5	MEF2C	S396	NetworKIN	0.191972		CDK5	MEF2C	S396	NetworKIN	-0.00585899		CDK5	MEF2C	S396	NetworKIN	-0.0480779
		CDK5	CTTN	S405	NetworKIN	-0.138791		CDK5	CTTN	S405	NetworKIN	0.140046		CDK5	CTTN	S405	NetworKIN	-0.276366		CDK5	CTTN	S405	NetworKIN	-0.0560519
		CDK5	TAOK1	S421	NetworKIN	-0.445182		CDK5	TAOK1	S421	NetworKIN	-0.0625926		CDK5	TAOK1	S421	NetworKIN	-0.230101		CDK5	TAOK1	S421	NetworKIN	-0.225917
		CDK5	MAD1L1	S428	NetworKIN	-0.313659		CDK5	MAD1L1	S428	NetworKIN	0.148841		CDK5	MAD1L1	S428	NetworKIN	-0.42677		CDK5	MAD1L1	S428	NetworKIN	0.284998
		CDK5	EPB41L2	S499	NetworKIN	-0.272367		CDK5	EPB41L2	S499	NetworKIN	-0.150415		CDK5	EPB41L2	S499	NetworKIN	-0.271693		CDK5	EPB41L2	S499	NetworKIN	0.125873
		CDK5	TSC1	S505	NetworKIN	-0.0957961		CDK5	TSC1	S505	NetworKIN	-0.303977		CDK5	TSC1	S505	NetworKIN	0.107126		CDK5	TSC1	S505	NetworKIN	0.290712
		CDK5	ZC3H14	S515	NetworKIN	-0.111389		CDK5	ZC3H14	S515	NetworKIN	-0.11003		CDK5	ZC3H14	S515	NetworKIN	-0.224545		CDK5	ZC3H14	S515	NetworKIN	-0.223558
		CDK5	DYNC1LI1	S516	NetworKIN	0.709355		CDK5	DYNC1LI1	S516	NetworKIN	0.984722		CDK5	DYNC1LI1	S516	NetworKIN	-0.444801		CDK5	DYNC1LI1	S516	NetworKIN	0.267689
		CDK5	NUMB	S634	NetworKIN	-0.351844		CDK5	NUMB	S634	NetworKIN	-0.070783		CDK5	NUMB	S634	NetworKIN	-0.611378		CDK5	NUMB	S634	NetworKIN	-0.0216014
		CDK5	DNMBP	S659	NetworKIN	-0.438153		CDK5	DNMBP	S659	NetworKIN	-0.250911		CDK5	DNMBP	S659	NetworKIN	-0.432117		CDK5	DNMBP	S659	NetworKIN	-0.449012
		CDK5	NES	S680	NetworKIN	0.413246		CDK5	NES	S680	NetworKIN	0.601194		CDK5	NES	S680	NetworKIN	0.241199		CDK5	NES	S680	NetworKIN	0.42766
		CDK5	SET	S7	NetworKIN	-0.0785255		CDK5	SET	S7	NetworKIN	-0.0741129		CDK5	SET	S7	NetworKIN	-0.0358264		CDK5	SET	S7	NetworKIN	-0.00345221
		CDK5	EPB41L2	S715	NetworKIN	-0.0624272		CDK5	EPB41L2	S715	NetworKIN	-0.00867744		CDK5	EPB41L2	S715	NetworKIN	-0.0891621		CDK5	EPB41L2	S715	NetworKIN	0.32567
		CDK5	KCNB1	S783	NetworKIN	0.0475297		CDK5	KCNB1	S783	NetworKIN	0.116934		CDK5	KCNB1	S783	NetworKIN	0.172741		CDK5	KCNB1	S783	NetworKIN	-0.283917
		CDK5	EPS15	S814	NetworKIN	0.312524		CDK5	EPS15	S814	NetworKIN	0.477345		CDK5	EPS15	S814	NetworKIN	0.142686		CDK5	EPS15	S814	NetworKIN	0.453879
		CDK5	NES	S842	NetworKIN	0.204715		CDK5	NES	S842	NetworKIN	0.74931		CDK5	NES	S842	NetworKIN	-0.153734		CDK5	NES	S842	NetworKIN	0.0721908
		CDK5	NUP107	S86	NetworKIN	0.857685		CDK5	NUP107	S86	NetworKIN	0.306647		CDK5	NUP107	S86	NetworKIN	0.431826		CDK5	NUP107	S86	NetworKIN	0.273537
		CDK5	ITSN1	S986	NetworKIN	-0.696629		CDK5	ITSN1	S986	NetworKIN	-0.924415		CDK5	ITSN1	S986	NetworKIN	-0.232467		CDK5	ITSN1	S986	NetworKIN	-0.285309
		CDK5	MAP1B	T1067	NetworKIN	-0.02448		CDK5	MAP1B	T1067	NetworKIN	0.0925014		CDK5	MAP1B	T1067	NetworKIN	-0.400795		CDK5	MAP1B	T1067	NetworKIN	0.107702
		CDK5	MAP2	T1605	NetworKIN	-0.0210523		CDK5	MAP2	T1605	NetworKIN	0.254		CDK5	MAP2	T1605	NetworKIN	0.07155		CDK5	MAP2	T1605	NetworKIN	0.0483895
		CDK5	MAP1B	T1788	NetworKIN	-0.602114		CDK5	MAP1B	T1788	NetworKIN	-0.211821		CDK5	MAP1B	T1788	NetworKIN	-0.255647		CDK5	MAP1B	T1788	NetworKIN	-0.512466
		CDK5	CLIP1	T182	NetworKIN	-0.645717		CDK5	CLIP1	T182	NetworKIN	-0.429814		CDK5	CLIP1	T182	NetworKIN	-0.541343		CDK5	CLIP1	T182	NetworKIN	-0.537954
		CDK5	TLN2	T1843	NetworKIN	-0.0402681		CDK5	TLN2	T1843	NetworKIN	-0.0807823		CDK5	TLN2	T1843	NetworKIN	-0.0748845		CDK5	TLN2	T1843	NetworKIN	-0.0221636
		CDK5	MAPK10	T221	NetworKIN	-0.0328739		CDK5	MAPK10	T221	NetworKIN	0.2455		CDK5	MAPK10	T221	NetworKIN	-0.223298		CDK5	MAPK10	T221	NetworKIN	0.289819
		CDK5	BIN1	T307	NetworKIN	0.328146		CDK5	BIN1	T307	NetworKIN	0.0546164		CDK5	BIN1	T307	NetworKIN	0.192518		CDK5	BIN1	T307	NetworKIN	-0.068959
		CDK5	BIN1	T348	NetworKIN	-0.136398		CDK5	BIN1	T348	NetworKIN	0.167698		CDK5	BIN1	T348	NetworKIN	-0.620851		CDK5	BIN1	T348	NetworKIN	1.0969
		CDK5	DYNC1LI1	T513	NetworKIN	0.136823		CDK5	DYNC1LI1	T513	NetworKIN	0.330164		CDK5	DYNC1LI1	T513	NetworKIN	-0.20376		CDK5	DYNC1LI1	T513	NetworKIN	0.641438
		CDK5	PRKAR2A	T54	NetworKIN	-0.0859097		CDK5	PRKAR2A	T54	NetworKIN	-0.0331573		CDK5	PRKAR2A	T54	NetworKIN	-0.11137		CDK5	PRKAR2A	T54	NetworKIN	-0.0886254
		CDK5	CLASP1	T711	NetworKIN	-0.150301		CDK5	CLASP1	T711	NetworKIN	-0.368128		CDK5	CLASP1	T711	NetworKIN	-0.207179		CDK5	CLASP1	T711	NetworKIN	0.210008
		CDK5	STAT3	T714	NetworKIN	0.271959		CDK5	STAT3	T714	NetworKIN	0.311242		CDK5	STAT3	T714	NetworKIN	0.00649104		CDK5	STAT3	T714	NetworKIN	0.329026
		CDK5	EPS15	T777	NetworKIN	-0.144791		CDK5	EPS15	T777	NetworKIN	0.412355		CDK5	EPS15	T777	NetworKIN	-0.488348		CDK5	EPS15	T777	NetworKIN	0.02887
		CDK6	NPM1	S125	NetworKIN	-0.0915148		CDK6	NPM1	S125	NetworKIN	-0.107424		CDK6	NPM1	S125	NetworKIN	-0.331386		CDK6	NPM1	S125	NetworKIN	-0.17342
		CDK6	CDKN1B	S178	NetworKIN	-0.452264		CDK6	CDKN1B	S178	NetworKIN	0.0206536		CDK6	CDKN1B	S178	NetworKIN	-0.316603		CDK6	CDKN1B	S178	NetworKIN	-0.18725
		CDK6	MCM2	S40	NetworKIN	-0.515648		CDK6	MCM2	S40	NetworKIN	-0.200188		CDK6	MCM2	S40	NetworKIN	-0.301179		CDK6	MCM2	S40	NetworKIN	-0.344562
		CDK6	PRKAR2A	S58	NetworKIN	-0.0166637		CDK6	PRKAR2A	S58	NetworKIN	-0.0823947		CDK6	PRKAR2A	S58	NetworKIN	-0.231985		CDK6	PRKAR2A	S58	NetworKIN	-0.158718
		CDK6	RBL2	S639	NetworKIN	-0.464092		CDK6	RBL2	S639	NetworKIN	0.205596		CDK6	RBL2	S639	NetworKIN	-0.00732032		CDK6	RBL2	S639	NetworKIN	-0.00606948
		CDK6	PARP1	S782	NetworKIN	0.55616		CDK6	PARP1	S782	NetworKIN	0.296943		CDK6	PARP1	S782	NetworKIN	0.365682		CDK6	PARP1	S782	NetworKIN	0.210788
		CDK6	AR	S96	NetworKIN	-0.106137		CDK6	AR	S96	NetworKIN	0.440784		CDK6	AR	S96	NetworKIN	-0.529494		CDK6	AR	S96	NetworKIN	-0.505363
		CDK6	WDR77	T5	NetworKIN	-0.0427405		CDK6	WDR77	T5	NetworKIN	-0.0594927		CDK6	WDR77	T5	NetworKIN	-0.24949		CDK6	WDR77	T5	NetworKIN	-0.099399
		CDK6	PRKAR2A	T54	NetworKIN	-0.0859097		CDK6	PRKAR2A	T54	NetworKIN	-0.0331573		CDK6	PRKAR2A	T54	NetworKIN	-0.11137		CDK6	PRKAR2A	T54	NetworKIN	-0.0886254
		CDK7	CDKN1B	S10	NetworKIN	-0.569669		CDK7	CDKN1B	S10	NetworKIN	-0.469392		CDK7	CDKN1B	S10	NetworKIN	-0.335243		CDK7	CDKN1B	S10	NetworKIN	-0.187349
		CDK7	TCEA1	S100	NetworKIN	-0.144944		CDK7	TCEA1	S100	NetworKIN	-0.0903744		CDK7	TCEA1	S100	NetworKIN	-0.122986		CDK7	TCEA1	S100	NetworKIN	-0.0262842
		CDK7	PCGF6	S115	NetworKIN	0.00728339		CDK7	PCGF6	S115	NetworKIN	-0.0335889		CDK7	PCGF6	S115	NetworKIN	-0.0921096		CDK7	PCGF6	S115	NetworKIN	-0.0531429
		CDK7	NCBP2	S13	NetworKIN	-0.500797		CDK7	NCBP2	S13	NetworKIN	-0.295023		CDK7	NCBP2	S13	NetworKIN	-0.293872		CDK7	NCBP2	S13	NetworKIN	-0.272321
		CDK7	INTS1	S1318	NetworKIN	0.962967		CDK7	INTS1	S1318	NetworKIN	1.65875		CDK7	INTS1	S1318	NetworKIN	1.24415		CDK7	INTS1	S1318	NetworKIN	1.829
		CDK7	INTS1	S1327	NetworKIN	-0.0355666		CDK7	INTS1	S1327	NetworKIN	-0.0267798		CDK7	INTS1	S1327	NetworKIN	-0.0245649		CDK7	INTS1	S1327	NetworKIN	-0.104999
		CDK7	RAD23B	S160	NetworKIN	0.807596		CDK7	RAD23B	S160	NetworKIN	1.37605		CDK7	RAD23B	S160	NetworKIN	-0.0910394		CDK7	RAD23B	S160	NetworKIN	1.79461
		CDK7	LEO1	S162	NetworKIN	-0.36303		CDK7	LEO1	S162	NetworKIN	0.00355131		CDK7	LEO1	S162	NetworKIN	-0.0767884		CDK7	LEO1	S162	NetworKIN	-0.0770085
		CDK7	TAF7	S171	NetworKIN	-0.314248		CDK7	TAF7	S171	NetworKIN	-0.10509		CDK7	TAF7	S171	NetworKIN	-0.442899		CDK7	TAF7	S171	NetworKIN	-0.150693
		CDK7	CDKN1B	S178	NetworKIN	-0.452264		CDK7	CDKN1B	S178	NetworKIN	0.0206536		CDK7	CDKN1B	S178	NetworKIN	-0.316603		CDK7	CDKN1B	S178	NetworKIN	-0.18725
		CDK7	TAF7	S213	NetworKIN	-0.143077		CDK7	TAF7	S213	NetworKIN	-0.167488		CDK7	TAF7	S213	NetworKIN	-0.118303		CDK7	TAF7	S213	NetworKIN	-0.0324007
		CDK7	CCNK	S340	NetworKIN	-0.127687		CDK7	CCNK	S340	NetworKIN	-0.175936		CDK7	CCNK	S340	NetworKIN	-0.173881		CDK7	CCNK	S340	NetworKIN	-0.0947292
		CDK7	GTF2F1	S385	NetworKIN	-0.256292		CDK7	GTF2F1	S385	NetworKIN	-0.268765		CDK7	GTF2F1	S385	NetworKIN	-0.144697		CDK7	GTF2F1	S385	NetworKIN	-0.000331758
		CDK7	MTA1	S449	NetworKIN	-0.327846		CDK7	MTA1	S449	NetworKIN	0.134023		CDK7	MTA1	S449	NetworKIN	-0.0270129		CDK7	MTA1	S449	NetworKIN	0.0358794
		CDK7	CCNT2	S480	NetworKIN	-0.397176		CDK7	CCNT2	S480	NetworKIN	-0.0592113		CDK7	CCNT2	S480	NetworKIN	-0.233589		CDK7	CCNT2	S480	NetworKIN	0.111155
		CDK7	TAF12	S51	NetworKIN	-0.02274		CDK7	TAF12	S51	NetworKIN	-0.0544249		CDK7	TAF12	S51	NetworKIN	-0.169132		CDK7	TAF12	S51	NetworKIN	-0.0685658
		CDK7	LEO1	S630	NetworKIN	0.257964		CDK7	LEO1	S630	NetworKIN	-0.119554		CDK7	LEO1	S630	NetworKIN	-0.165324		CDK7	LEO1	S630	NetworKIN	0.0768652
		CDK7	SUPT5H	S666	NetworKIN	0.105874		CDK7	SUPT5H	S666	NetworKIN	-0.073238		CDK7	SUPT5H	S666	NetworKIN	-0.0703995		CDK7	SUPT5H	S666	NetworKIN	0.113878
		CDK7	CTDP1	S839	NetworKIN	-0.0925096		CDK7	CTDP1	S839	NetworKIN	-0.100245		CDK7	CTDP1	S839	NetworKIN	-0.179598		CDK7	CTDP1	S839	NetworKIN	0.0258469
		CDK7	CTR9	S941	NetworKIN	0.108482		CDK7	CTR9	S941	NetworKIN	-0.0681743		CDK7	CTR9	S941	NetworKIN	0.0128636		CDK7	CTR9	S941	NetworKIN	-0.146093
		CDK7	AR	S96	NetworKIN	-0.106137		CDK7	AR	S96	NetworKIN	0.440784		CDK7	AR	S96	NetworKIN	-0.529494		CDK7	AR	S96	NetworKIN	-0.505363
		CDK7	CTR9	S970	NetworKIN	-0.00483745		CDK7	CTR9	S970	NetworKIN	-0.0575702		CDK7	CTR9	S970	NetworKIN	0.0954489		CDK7	CTR9	S970	NetworKIN	-0.0110697
		CDK7	RAD23B	T155	NetworKIN	0.533252		CDK7	RAD23B	T155	NetworKIN	1.47777		CDK7	RAD23B	T155	NetworKIN	-0.3734		CDK7	RAD23B	T155	NetworKIN	1.05188
		CDK7	CDK7	T170	NetworKIN	-0.194787		CDK7	CDK7	T170	NetworKIN	0.0453446		CDK7	CDK7	T170	NetworKIN	-0.117108		CDK7	CDK7	T170	NetworKIN	-0.0386605
		CDK7	GTF2F1	T331	NetworKIN	-0.253168		CDK7	GTF2F1	T331	NetworKIN	0.150849		CDK7	GTF2F1	T331	NetworKIN	-0.0530455		CDK7	GTF2F1	T331	NetworKIN	0.297757
		CDK7	GTF2F1	T446	NetworKIN	-0.400867		CDK7	GTF2F1	T446	NetworKIN	-0.221464		CDK7	GTF2F1	T446	NetworKIN	-0.439333		CDK7	GTF2F1	T446	NetworKIN	-0.276451
		CDK7	TAF12	T59	NetworKIN	-0.238881		CDK7	TAF12	T59	NetworKIN	-0.0844108		CDK7	TAF12	T59	NetworKIN	-0.498849		CDK7	TAF12	T59	NetworKIN	-0.18926
		CHUK	IRS1	S1100	NetworKIN	-0.129783		CHUK	IRS1	S1100	NetworKIN	-0.258157		CHUK	IRS1	S1100	NetworKIN	-0.0389021		CHUK	IRS1	S1100	NetworKIN	-0.0100686
		CHUK	AKT1	S124	NetworKIN	-0.195004		CHUK	AKT1	S124	NetworKIN	-0.0287572		CHUK	AKT1	S124	NetworKIN	-0.199384		CHUK	AKT1	S124	NetworKIN	0.219376
		CHUK	TANK	S129	NetworKIN	0.0773932		CHUK	TANK	S129	NetworKIN	-0.183802		CHUK	TANK	S129	NetworKIN	0.310466		CHUK	TANK	S129	NetworKIN	0.00972242
		CHUK	MAP3K8	S141	NetworKIN	-0.152299		CHUK	MAP3K8	S141	NetworKIN	-0.277846		CHUK	MAP3K8	S141	NetworKIN	0.0493845		CHUK	MAP3K8	S141	NetworKIN	-0.307237
		CHUK	FLNA	S1459	NetworKIN	0.327072		CHUK	FLNA	S1459	NetworKIN	0.331363		CHUK	FLNA	S1459	NetworKIN	-0.256105		CHUK	FLNA	S1459	NetworKIN	0.0446856
		CHUK	NCOR1	S1472	NetworKIN	-0.10342		CHUK	NCOR1	S1472	NetworKIN	-0.131983		CHUK	NCOR1	S1472	NetworKIN	-0.134327		CHUK	NCOR1	S1472	NetworKIN	-0.0798715
		CHUK	HSPB1	S15	NetworKIN	0.907348		CHUK	HSPB1	S15	NetworKIN	1.06209		CHUK	HSPB1	S15	NetworKIN	-0.24272		CHUK	HSPB1	S15	NetworKIN	1.33422
		CHUK	PEBP1	S153	NetworKIN	-0.168334		CHUK	PEBP1	S153	NetworKIN	0.622635		CHUK	PEBP1	S153	NetworKIN	0.163425		CHUK	PEBP1	S153	NetworKIN	0.0199989
		CHUK	MAVS	S165	NetworKIN	0.216948		CHUK	MAVS	S165	NetworKIN	-0.0324596		CHUK	MAVS	S165	NetworKIN	-0.279469		CHUK	MAVS	S165	NetworKIN	0.140594
		CHUK	ERC1	S17	NetworKIN	-1.99232		CHUK	ERC1	S17	NetworKIN	-1.37516		CHUK	ERC1	S17	NetworKIN	-0.817184		CHUK	ERC1	S17	NetworKIN	-0.693357
		CHUK	IRF3	S173	NetworKIN	-0.448969		CHUK	IRF3	S173	NetworKIN	-0.165287		CHUK	IRF3	S173	NetworKIN	-0.113078		CHUK	IRF3	S173	NetworKIN	-0.367672
		CHUK	HSPB1	S199	NetworKIN	0.0759985		CHUK	HSPB1	S199	NetworKIN	0.83824		CHUK	HSPB1	S199	NetworKIN	-0.625257		CHUK	HSPB1	S199	NetworKIN	1.11307
		CHUK	CREBBP	S2063	NetworKIN	0.324265		CHUK	CREBBP	S2063	NetworKIN	0.0663711		CHUK	CREBBP	S2063	NetworKIN	0.501822		CHUK	CREBBP	S2063	NetworKIN	-0.000141703
		CHUK	SQSTM1	S207	NetworKIN	0.429235		CHUK	SQSTM1	S207	NetworKIN	0.278453		CHUK	SQSTM1	S207	NetworKIN	-0.194634		CHUK	SQSTM1	S207	NetworKIN	-0.0793739
		CHUK	ERC1	S21	NetworKIN	-0.0794882		CHUK	ERC1	S21	NetworKIN	-0.502668		CHUK	ERC1	S21	NetworKIN	0.0845068		CHUK	ERC1	S21	NetworKIN	0.16339
		CHUK	FLNA	S2152	NetworKIN	0.485165		CHUK	FLNA	S2152	NetworKIN	0.479362		CHUK	FLNA	S2152	NetworKIN	0.0076573		CHUK	FLNA	S2152	NetworKIN	0.058782
		CHUK	FLNA	S2180	NetworKIN	-0.040085		CHUK	FLNA	S2180	NetworKIN	0.368375		CHUK	FLNA	S2180	NetworKIN	-0.239189		CHUK	FLNA	S2180	NetworKIN	0.15361
		CHUK	NCOR1	S2184	NetworKIN	-0.13656		CHUK	NCOR1	S2184	NetworKIN	0.0818507		CHUK	NCOR1	S2184	NetworKIN	-0.370374		CHUK	NCOR1	S2184	NetworKIN	0.0260356
		CHUK	MAVS	S222	NetworKIN	0.513141		CHUK	MAVS	S222	NetworKIN	0.803329		CHUK	MAVS	S222	NetworKIN	-0.556973		CHUK	MAVS	S222	NetworKIN	0.832508
		CHUK	NCOR1	S224	NetworKIN	-0.164264		CHUK	NCOR1	S224	NetworKIN	-0.118937		CHUK	NCOR1	S224	NetworKIN	-0.144772		CHUK	NCOR1	S224	NetworKIN	-0.00898119
		CHUK	PRKCA	S226	NetworKIN	0.18256		CHUK	PRKCA	S226	NetworKIN	0.0907752		CHUK	PRKCA	S226	NetworKIN	0.0478914		CHUK	PRKCA	S226	NetworKIN	0.218535
		CHUK	FLNA	S2327	NetworKIN	0.0595483		CHUK	FLNA	S2327	NetworKIN	-0.168603		CHUK	FLNA	S2327	NetworKIN	-0.323959		CHUK	FLNA	S2327	NetworKIN	-0.136373
		CHUK	SQSTM1	S24	NetworKIN	0.576343		CHUK	SQSTM1	S24	NetworKIN	0.835291		CHUK	SQSTM1	S24	NetworKIN	0.412471		CHUK	SQSTM1	S24	NetworKIN	0.799409
		CHUK	MAVS	S253	NetworKIN	-0.519855		CHUK	MAVS	S253	NetworKIN	-0.236714		CHUK	MAVS	S253	NetworKIN	-0.294434		CHUK	MAVS	S253	NetworKIN	-0.351626
		CHUK	IRS1	S270	NetworKIN	0.0203466		CHUK	IRS1	S270	NetworKIN	0.0346936		CHUK	IRS1	S270	NetworKIN	-0.295139		CHUK	IRS1	S270	NetworKIN	-0.241222
		CHUK	SQSTM1	S272	NetworKIN	0.628063		CHUK	SQSTM1	S272	NetworKIN	0.293828		CHUK	SQSTM1	S272	NetworKIN	0.304159		CHUK	SQSTM1	S272	NetworKIN	1.20453
		CHUK	SQSTM1	S28	NetworKIN	0.092217		CHUK	SQSTM1	S28	NetworKIN	0.098083		CHUK	SQSTM1	S28	NetworKIN	0.0846635		CHUK	SQSTM1	S28	NetworKIN	0.0174975
		CHUK	MTDH	S298	NetworKIN	0.246117		CHUK	MTDH	S298	NetworKIN	0.716859		CHUK	MTDH	S298	NetworKIN	-0.714748		CHUK	MTDH	S298	NetworKIN	0.289785
		CHUK	IRS1	S307	NetworKIN	0.265831		CHUK	IRS1	S307	NetworKIN	0.207767		CHUK	IRS1	S307	NetworKIN	-0.543854		CHUK	IRS1	S307	NetworKIN	-0.0853991
		CHUK	FOXO3	S315	NetworKIN	0.282828		CHUK	FOXO3	S315	NetworKIN	0.103762		CHUK	FOXO3	S315	NetworKIN	0.745378		CHUK	FOXO3	S315	NetworKIN	0.405516
		CHUK	PRKCA	S319	NetworKIN	0.395863		CHUK	PRKCA	S319	NetworKIN	0.51577		CHUK	PRKCA	S319	NetworKIN	0.236552		CHUK	PRKCA	S319	NetworKIN	0.426276
		CHUK	IRS1	S323	NetworKIN	0.0296314		CHUK	IRS1	S323	NetworKIN	-0.298322		CHUK	IRS1	S323	NetworKIN	0.0122596		CHUK	IRS1	S323	NetworKIN	-0.00259566
		CHUK	IRS1	S348	NetworKIN	-0.923015		CHUK	IRS1	S348	NetworKIN	-0.959854		CHUK	IRS1	S348	NetworKIN	0.413863		CHUK	IRS1	S348	NetworKIN	0.075369
		CHUK	SQSTM1	S355	NetworKIN	-0.70093		CHUK	SQSTM1	S355	NetworKIN	-0.0410583		CHUK	SQSTM1	S355	NetworKIN	-0.218666		CHUK	SQSTM1	S355	NetworKIN	-0.394292
		CHUK	PRKCE	S368	NetworKIN	-0.809184		CHUK	PRKCE	S368	NetworKIN	-0.332645		CHUK	PRKCE	S368	NetworKIN	-0.412285		CHUK	PRKCE	S368	NetworKIN	-0.605137
		CHUK	MAP3K7	S389	NetworKIN	-0.12889		CHUK	MAP3K7	S389	NetworKIN	-0.157954		CHUK	MAP3K7	S389	NetworKIN	-0.133467		CHUK	MAP3K7	S389	NetworKIN	-0.418626
		CHUK	MTDH	S426	NetworKIN	-0.153757		CHUK	MTDH	S426	NetworKIN	-0.143141		CHUK	MTDH	S426	NetworKIN	-0.0518555		CHUK	MTDH	S426	NetworKIN	-0.0694849
		CHUK	MAP3K7	S439	NetworKIN	-0.167399		CHUK	MAP3K7	S439	NetworKIN	-0.00522858		CHUK	MAP3K7	S439	NetworKIN	-0.413548		CHUK	MAP3K7	S439	NetworKIN	-0.174915
		CHUK	PIAS1	S503	NetworKIN	-0.310405		CHUK	PIAS1	S503	NetworKIN	-0.0253844		CHUK	PIAS1	S503	NetworKIN	-0.187582		CHUK	PIAS1	S503	NetworKIN	-0.18809
		CHUK	PEBP1	S52	NetworKIN	-0.0794621		CHUK	PEBP1	S52	NetworKIN	-0.120339		CHUK	PEBP1	S52	NetworKIN	-0.199903		CHUK	PEBP1	S52	NetworKIN	-0.0981516
		CHUK	IRS1	S527	NetworKIN	0.0507815		CHUK	IRS1	S527	NetworKIN	0.159662		CHUK	IRS1	S527	NetworKIN	-0.348206		CHUK	IRS1	S527	NetworKIN	0.151421
		CHUK	IRS2	S560	NetworKIN	-0.111161		CHUK	IRS2	S560	NetworKIN	-0.138851		CHUK	IRS2	S560	NetworKIN	0.00682105		CHUK	IRS2	S560	NetworKIN	0.0657277
		CHUK	MTDH	S568	NetworKIN	-0.196439		CHUK	MTDH	S568	NetworKIN	-0.515023		CHUK	MTDH	S568	NetworKIN	0.0229704		CHUK	MTDH	S568	NetworKIN	0.128563
		CHUK	IRS1	S574	NetworKIN	0.352588		CHUK	IRS1	S574	NetworKIN	-0.0293696		CHUK	IRS1	S574	NetworKIN	0.0134484		CHUK	IRS1	S574	NetworKIN	0.123075
		CHUK	IRS2	S577	NetworKIN	-0.128507		CHUK	IRS2	S577	NetworKIN	0.0115757		CHUK	IRS2	S577	NetworKIN	0.415537		CHUK	IRS2	S577	NetworKIN	0.0934234
		CHUK	IRS1	S629	NetworKIN	-0.287644		CHUK	IRS1	S629	NetworKIN	-0.148885		CHUK	IRS1	S629	NetworKIN	-0.21059		CHUK	IRS1	S629	NetworKIN	-0.399285
		CHUK	IRS1	S636	NetworKIN	-0.0857303		CHUK	IRS1	S636	NetworKIN	-0.141597		CHUK	IRS1	S636	NetworKIN	-0.230654		CHUK	IRS1	S636	NetworKIN	0.310924
		CHUK	HSPB1	S65	NetworKIN	-0.0544483		CHUK	HSPB1	S65	NetworKIN	0.609351		CHUK	HSPB1	S65	NetworKIN	-0.264683		CHUK	HSPB1	S65	NetworKIN	0.522503
		CHUK	IKBKB	S672	NetworKIN	-0.548396		CHUK	IKBKB	S672	NetworKIN	-0.475528		CHUK	IKBKB	S672	NetworKIN	-0.570616		CHUK	IKBKB	S672	NetworKIN	-0.225144
		CHUK	PRKCQ	S676	NetworKIN	-0.051396		CHUK	PRKCQ	S676	NetworKIN	-0.0640315		CHUK	PRKCQ	S676	NetworKIN	0.0662374		CHUK	PRKCQ	S676	NetworKIN	0.0990667
		CHUK	PRKCQ	S685	NetworKIN	0.198311		CHUK	PRKCQ	S685	NetworKIN	0.106791		CHUK	PRKCQ	S685	NetworKIN	-0.197913		CHUK	PRKCQ	S685	NetworKIN	-0.21817
		CHUK	PRKCQ	S695	NetworKIN	-0.047501		CHUK	PRKCQ	S695	NetworKIN	0.0532247		CHUK	PRKCQ	S695	NetworKIN	-0.214765		CHUK	PRKCQ	S695	NetworKIN	-0.0174269
		CHUK	PRKCE	S729	NetworKIN	-0.313427		CHUK	PRKCE	S729	NetworKIN	-0.106405		CHUK	PRKCE	S729	NetworKIN	-0.472386		CHUK	PRKCE	S729	NetworKIN	-0.128153
		CHUK	HSPB1	S82	NetworKIN	0.189405		CHUK	HSPB1	S82	NetworKIN	0.769092		CHUK	HSPB1	S82	NetworKIN	-0.292281		CHUK	HSPB1	S82	NetworKIN	0.756969
		CHUK	HSPB1	S83	NetworKIN	0.543042		CHUK	HSPB1	S83	NetworKIN	1.07493		CHUK	HSPB1	S83	NetworKIN	-0.337007		CHUK	HSPB1	S83	NetworKIN	1.28287
		CHUK	HSPB1	S86	NetworKIN	0.413524		CHUK	HSPB1	S86	NetworKIN	0.283909		CHUK	HSPB1	S86	NetworKIN	-0.0210476		CHUK	HSPB1	S86	NetworKIN	0.72194
		CHUK	PRKDC	S893	NetworKIN	-0.200063		CHUK	PRKDC	S893	NetworKIN	-0.0227256		CHUK	PRKDC	S893	NetworKIN	-0.420437		CHUK	PRKDC	S893	NetworKIN	-0.155956
		CHUK	NCOR2	S939	NetworKIN	0.107379		CHUK	NCOR2	S939	NetworKIN	0.373819		CHUK	NCOR2	S939	NetworKIN	0.0828896		CHUK	NCOR2	S939	NetworKIN	0.306654
		CHUK	HSPB1	S98	NetworKIN	0.163396		CHUK	HSPB1	S98	NetworKIN	0.156115		CHUK	HSPB1	S98	NetworKIN	-0.196231		CHUK	HSPB1	S98	NetworKIN	0.0229462
		CLK1	PNN	S100	NetworKIN	-0.4944		CLK1	PNN	S100	NetworKIN	-0.456629		CLK1	PNN	S100	NetworKIN	0.0680791		CLK1	PNN	S100	NetworKIN	0.118453
		CLK1	SRRM2	S1014	NetworKIN	-0.0537058		CLK1	SRRM2	S1014	NetworKIN	-0.0620941		CLK1	SRRM2	S1014	NetworKIN	-0.183365		CLK1	SRRM2	S1014	NetworKIN	-0.10546
		CLK1	SRRM2	S1083	NetworKIN	-0.196466		CLK1	SRRM2	S1083	NetworKIN	-0.0409443		CLK1	SRRM2	S1083	NetworKIN	-0.219085		CLK1	SRRM2	S1083	NetworKIN	-0.0932176
		CLK1	SRRM2	S1103	NetworKIN	-0.0412919		CLK1	SRRM2	S1103	NetworKIN	0.223475		CLK1	SRRM2	S1103	NetworKIN	-0.141769		CLK1	SRRM2	S1103	NetworKIN	0.17684
		CLK1	SRRM2	S1132	NetworKIN	-0.272811		CLK1	SRRM2	S1132	NetworKIN	0.0346924		CLK1	SRRM2	S1132	NetworKIN	-0.17159		CLK1	SRRM2	S1132	NetworKIN	0.09331
		CLK1	SRRM2	S1179	NetworKIN	0.212383		CLK1	SRRM2	S1179	NetworKIN	0.281289		CLK1	SRRM2	S1179	NetworKIN	0.336075		CLK1	SRRM2	S1179	NetworKIN	0.285434
		CLK1	SRRM2	S1188	NetworKIN	0.42849		CLK1	SRRM2	S1188	NetworKIN	0.528906		CLK1	SRRM2	S1188	NetworKIN	0.0600197		CLK1	SRRM2	S1188	NetworKIN	0.464177
		CLK1	SEC24B	S1224	NetworKIN	-0.00440588		CLK1	SEC24B	S1224	NetworKIN	0.15309		CLK1	SEC24B	S1224	NetworKIN	-0.119447		CLK1	SEC24B	S1224	NetworKIN	-0.27525
		CLK1	SRRM2	S1320	NetworKIN	-0.145342		CLK1	SRRM2	S1320	NetworKIN	-0.0657393		CLK1	SRRM2	S1320	NetworKIN	-0.170552		CLK1	SRRM2	S1320	NetworKIN	-0.0255047
		CLK1	RBM39	S136	NetworKIN	-0.112016		CLK1	RBM39	S136	NetworKIN	-0.149999		CLK1	RBM39	S136	NetworKIN	-0.159017		CLK1	RBM39	S136	NetworKIN	-0.0946056
		CLK1	DDX23	S14	NetworKIN	-0.472718		CLK1	DDX23	S14	NetworKIN	0.0147832		CLK1	DDX23	S14	NetworKIN	-0.133911		CLK1	DDX23	S14	NetworKIN	0.73131
		CLK1	NCOR1	S1472	NetworKIN	-0.10342		CLK1	NCOR1	S1472	NetworKIN	-0.131983		CLK1	NCOR1	S1472	NetworKIN	-0.134327		CLK1	NCOR1	S1472	NetworKIN	-0.0798715
		CLK1	SRRM2	S1672	NetworKIN	0.0872809		CLK1	SRRM2	S1672	NetworKIN	0.0303819		CLK1	SRRM2	S1672	NetworKIN	0.246988		CLK1	SRRM2	S1672	NetworKIN	0.183101
		CLK1	SRRM2	S1691	NetworKIN	-0.187023		CLK1	SRRM2	S1691	NetworKIN	-0.323468		CLK1	SRRM2	S1691	NetworKIN	-0.339781		CLK1	SRRM2	S1691	NetworKIN	-0.0518155
		CLK1	SON	S1697	NetworKIN	0.206898		CLK1	SON	S1697	NetworKIN	0.113218		CLK1	SON	S1697	NetworKIN	0.0264982		CLK1	SON	S1697	NetworKIN	0.266936
		CLK1	BCLAF1	S177	NetworKIN	-0.018241		CLK1	BCLAF1	S177	NetworKIN	-0.160215		CLK1	BCLAF1	S177	NetworKIN	-0.0921255		CLK1	BCLAF1	S177	NetworKIN	-0.0839023
		CLK1	BCLAF1	S181	NetworKIN	0.261452		CLK1	BCLAF1	S181	NetworKIN	0.0251022		CLK1	BCLAF1	S181	NetworKIN	0.422363		CLK1	BCLAF1	S181	NetworKIN	-0.0534401
		CLK1	SRRM2	S1857	NetworKIN	-0.435642		CLK1	SRRM2	S1857	NetworKIN	-0.12754		CLK1	SRRM2	S1857	NetworKIN	-0.0160107		CLK1	SRRM2	S1857	NetworKIN	-0.288703
		CLK1	SRRM2	S1916	NetworKIN	0.412312		CLK1	SRRM2	S1916	NetworKIN	0.745996		CLK1	SRRM2	S1916	NetworKIN	0.652423		CLK1	SRRM2	S1916	NetworKIN	0.846514
		CLK1	SRRM2	S1975	NetworKIN	-0.494013		CLK1	SRRM2	S1975	NetworKIN	-0.279763		CLK1	SRRM2	S1975	NetworKIN	-0.108603		CLK1	SRRM2	S1975	NetworKIN	-0.133131
		CLK1	SRRM2	S1984	NetworKIN	0.143913		CLK1	SRRM2	S1984	NetworKIN	0.305719		CLK1	SRRM2	S1984	NetworKIN	0.533333		CLK1	SRRM2	S1984	NetworKIN	0.467187
		CLK1	MBP	S205	NetworKIN	-0.178085		CLK1	MBP	S205	NetworKIN	-0.0244682		CLK1	MBP	S205	NetworKIN	-0.382947		CLK1	MBP	S205	NetworKIN	-0.135491
		CLK1	NCOR1	S2120	NetworKIN	-0.149927		CLK1	NCOR1	S2120	NetworKIN	-0.22444		CLK1	NCOR1	S2120	NetworKIN	-0.0287035		CLK1	NCOR1	S2120	NetworKIN	-0.00735606
		CLK1	NCOR1	S2184	NetworKIN	-0.13656		CLK1	NCOR1	S2184	NetworKIN	0.0818507		CLK1	NCOR1	S2184	NetworKIN	-0.370374		CLK1	NCOR1	S2184	NetworKIN	0.0260356
		CLK1	NCOR1	S224	NetworKIN	-0.164264		CLK1	NCOR1	S224	NetworKIN	-0.118937		CLK1	NCOR1	S224	NetworKIN	-0.144772		CLK1	NCOR1	S224	NetworKIN	-0.00898119
		CLK1	SNRNP70	S226	NetworKIN	0.100613		CLK1	SNRNP70	S226	NetworKIN	-0.127356		CLK1	SNRNP70	S226	NetworKIN	-0.140895		CLK1	SNRNP70	S226	NetworKIN	0.0295783
		CLK1	SRRM2	S2581	NetworKIN	-0.137581		CLK1	SRRM2	S2581	NetworKIN	-0.0691959		CLK1	SRRM2	S2581	NetworKIN	-0.131481		CLK1	SRRM2	S2581	NetworKIN	-0.0583113
		CLK1	SRRM2	S2702	NetworKIN	-0.185885		CLK1	SRRM2	S2702	NetworKIN	-0.0430183		CLK1	SRRM2	S2702	NetworKIN	-0.0798312		CLK1	SRRM2	S2702	NetworKIN	-0.0592202
		CLK1	BCLAF1	S285	NetworKIN	0.197314		CLK1	BCLAF1	S285	NetworKIN	-0.120532		CLK1	BCLAF1	S285	NetworKIN	0.122027		CLK1	BCLAF1	S285	NetworKIN	-0.148122
		CLK1	RSRC2	S30	NetworKIN	-0.332472		CLK1	RSRC2	S30	NetworKIN	-0.340562		CLK1	RSRC2	S30	NetworKIN	-0.382991		CLK1	RSRC2	S30	NetworKIN	-0.338931
		CLK1	RSRC2	S32	NetworKIN	-0.047772		CLK1	RSRC2	S32	NetworKIN	-0.0853151		CLK1	RSRC2	S32	NetworKIN	-0.198164		CLK1	RSRC2	S32	NetworKIN	0.0426086
		CLK1	SRRM2	S323	NetworKIN	0.107807		CLK1	SRRM2	S323	NetworKIN	0.125759		CLK1	SRRM2	S323	NetworKIN	-0.100271		CLK1	SRRM2	S323	NetworKIN	0.292842
		CLK1	SAFB	S344	NetworKIN	0.630903		CLK1	SAFB	S344	NetworKIN	-0.0263128		CLK1	SAFB	S344	NetworKIN	0.244949		CLK1	SAFB	S344	NetworKIN	0.190313
		CLK1	SRRM2	S351	NetworKIN	-0.187438		CLK1	SRRM2	S351	NetworKIN	0.303926		CLK1	SRRM2	S351	NetworKIN	-0.0890281		CLK1	SRRM2	S351	NetworKIN	0.0102889
		CLK1	SRRM2	S353	NetworKIN	-0.154336		CLK1	SRRM2	S353	NetworKIN	-0.269514		CLK1	SRRM2	S353	NetworKIN	-0.0625701		CLK1	SRRM2	S353	NetworKIN	0.126236
		CLK1	SRRM2	S377	NetworKIN	-0.243818		CLK1	SRRM2	S377	NetworKIN	-0.404336		CLK1	SRRM2	S377	NetworKIN	-0.256178		CLK1	SRRM2	S377	NetworKIN	-0.196762
		CLK1	SAFB	S384	NetworKIN	0.240316		CLK1	SAFB	S384	NetworKIN	0.274708		CLK1	SAFB	S384	NetworKIN	0.0265426		CLK1	SAFB	S384	NetworKIN	0.497881
		CLK1	BCLAF1	S496	NetworKIN	-0.259628		CLK1	BCLAF1	S496	NetworKIN	-0.00560442		CLK1	BCLAF1	S496	NetworKIN	-0.0946942		CLK1	BCLAF1	S496	NetworKIN	0.246892
		CLK1	BCLAF1	S512	NetworKIN	0.185684		CLK1	BCLAF1	S512	NetworKIN	0.00291439		CLK1	BCLAF1	S512	NetworKIN	-0.0317801		CLK1	BCLAF1	S512	NetworKIN	0.167662
		CLK1	BCLAF1	S531	NetworKIN	-0.17098		CLK1	BCLAF1	S531	NetworKIN	-0.190412		CLK1	BCLAF1	S531	NetworKIN	-0.213317		CLK1	BCLAF1	S531	NetworKIN	-0.196286
		CLK1	BCLAF1	S658	NetworKIN	-0.0073329		CLK1	BCLAF1	S658	NetworKIN	-0.0394056		CLK1	BCLAF1	S658	NetworKIN	-0.0584928		CLK1	BCLAF1	S658	NetworKIN	0.0142801
		CLK1	PNN	S66	NetworKIN	0.144164		CLK1	PNN	S66	NetworKIN	0.301284		CLK1	PNN	S66	NetworKIN	-0.400171		CLK1	PNN	S66	NetworKIN	-0.0497723
		CLK1	BCLAF1	S660	NetworKIN	0.0876069		CLK1	BCLAF1	S660	NetworKIN	0.0427102		CLK1	BCLAF1	S660	NetworKIN	-0.0196199		CLK1	BCLAF1	S660	NetworKIN	0.212519
		CLK1	ADD3	S681	NetworKIN	-0.2814		CLK1	ADD3	S681	NetworKIN	-0.0125177		CLK1	ADD3	S681	NetworKIN	-0.157995		CLK1	ADD3	S681	NetworKIN	-0.0640621
		CLK1	ADD3	S683	NetworKIN	-0.191407		CLK1	ADD3	S683	NetworKIN	-0.293399		CLK1	ADD3	S683	NetworKIN	-0.0802375		CLK1	ADD3	S683	NetworKIN	0.0601517
		CLK1	PPIG	S687	NetworKIN	-0.0635175		CLK1	PPIG	S687	NetworKIN	-0.0347144		CLK1	PPIG	S687	NetworKIN	-0.193368		CLK1	PPIG	S687	NetworKIN	-0.0860392
		CLK1	PPIG	S717	NetworKIN	-0.230763		CLK1	PPIG	S717	NetworKIN	-0.153728		CLK1	PPIG	S717	NetworKIN	-0.503852		CLK1	PPIG	S717	NetworKIN	-0.348781
		CLK1	BCLAF1	S760	NetworKIN	0.0593897		CLK1	BCLAF1	S760	NetworKIN	0.307391		CLK1	BCLAF1	S760	NetworKIN	0.306347		CLK1	BCLAF1	S760	NetworKIN	0.177579
		CLK1	SRRM2	S876	NetworKIN	-0.0575096		CLK1	SRRM2	S876	NetworKIN	-0.000322823		CLK1	SRRM2	S876	NetworKIN	-0.117753		CLK1	SRRM2	S876	NetworKIN	0.00798206
		CLK1	SRRM2	S895	NetworKIN	-0.790645		CLK1	SRRM2	S895	NetworKIN	-0.330656		CLK1	SRRM2	S895	NetworKIN	0.354566		CLK1	SRRM2	S895	NetworKIN	-0.22372
		CLK1	SRRM2	S908	NetworKIN	-0.182724		CLK1	SRRM2	S908	NetworKIN	0.207427		CLK1	SRRM2	S908	NetworKIN	0.218603		CLK1	SRRM2	S908	NetworKIN	0.0522006
		CLK1	SRRM2	S952	NetworKIN	-0.629037		CLK1	SRRM2	S952	NetworKIN	-0.262745		CLK1	SRRM2	S952	NetworKIN	-0.428263		CLK1	SRRM2	S952	NetworKIN	-0.515261
		CLK1	MBP	S96	NetworKIN	0.0993478		CLK1	MBP	S96	NetworKIN	-0.171874		CLK1	MBP	S96	NetworKIN	0.549343		CLK1	MBP	S96	NetworKIN	0.435355
		CLK1	PNN	S96	NetworKIN	-0.18165		CLK1	PNN	S96	NetworKIN	0.0752395		CLK1	PNN	S96	NetworKIN	-0.211324		CLK1	PNN	S96	NetworKIN	-0.194465
		CLK1	RBM39	S97	NetworKIN	-0.144465		CLK1	RBM39	S97	NetworKIN	-0.0917817		CLK1	RBM39	S97	NetworKIN	-0.100062		CLK1	RBM39	S97	NetworKIN	0.0396941
		CLK1	SRRM2	S994	NetworKIN	0.0256241		CLK1	SRRM2	S994	NetworKIN	-0.0550153		CLK1	SRRM2	S994	NetworKIN	0.0672521		CLK1	SRRM2	S994	NetworKIN	-0.0222593
		CLK1	SRRM2	T1003	NetworKIN	-0.123869		CLK1	SRRM2	T1003	NetworKIN	-0.0417236		CLK1	SRRM2	T1003	NetworKIN	-0.160646		CLK1	SRRM2	T1003	NetworKIN	-0.0180083
		CLK1	SRRM2	T1043	NetworKIN	-0.098952		CLK1	SRRM2	T1043	NetworKIN	0.121437		CLK1	SRRM2	T1043	NetworKIN	-0.112949		CLK1	SRRM2	T1043	NetworKIN	0.0818923
		CLK1	SRRM2	T1434	NetworKIN	0.162072		CLK1	SRRM2	T1434	NetworKIN	-0.0208688		CLK1	SRRM2	T1434	NetworKIN	0.223956		CLK1	SRRM2	T1434	NetworKIN	0.147172
		CLK1	SRRM2	T1492	NetworKIN	0.126271		CLK1	SRRM2	T1492	NetworKIN	-0.0395354		CLK1	SRRM2	T1492	NetworKIN	0.0421781		CLK1	SRRM2	T1492	NetworKIN	0.0901115
		CLK1	SRRM2	T2409	NetworKIN	0.117416		CLK1	SRRM2	T2409	NetworKIN	-0.113331		CLK1	SRRM2	T2409	NetworKIN	-0.519992		CLK1	SRRM2	T2409	NetworKIN	-0.088658
		CLK1	SRRM2	T2583	NetworKIN	-0.089173		CLK1	SRRM2	T2583	NetworKIN	0.0100962		CLK1	SRRM2	T2583	NetworKIN	0.136339		CLK1	SRRM2	T2583	NetworKIN	0.153764
		CLK1	SRRM2	T2738	NetworKIN	-0.587403		CLK1	SRRM2	T2738	NetworKIN	-0.00564702		CLK1	SRRM2	T2738	NetworKIN	-0.316927		CLK1	SRRM2	T2738	NetworKIN	-0.0577323
		CLK1	PPIG	T358	NetworKIN	-0.124317		CLK1	PPIG	T358	NetworKIN	-0.112886		CLK1	PPIG	T358	NetworKIN	-0.0474806		CLK1	PPIG	T358	NetworKIN	0.176205
		CLK1	BCLAF1	T661	NetworKIN	0.133181		CLK1	BCLAF1	T661	NetworKIN	0.485785		CLK1	BCLAF1	T661	NetworKIN	0.237444		CLK1	BCLAF1	T661	NetworKIN	0.225205
		CLK1	SRRM2	T866	NetworKIN	-0.214205		CLK1	SRRM2	T866	NetworKIN	-0.209242		CLK1	SRRM2	T866	NetworKIN	-0.136771		CLK1	SRRM2	T866	NetworKIN	-0.182769
		CLK1	SRRM2	T903	NetworKIN	0.21814		CLK1	SRRM2	T903	NetworKIN	0.0599342		CLK1	SRRM2	T903	NetworKIN	-0.0600152		CLK1	SRRM2	T903	NetworKIN	0.136747
		CLK1	SRRM2	T983	NetworKIN	0.0720809		CLK1	SRRM2	T983	NetworKIN	-0.192627		CLK1	SRRM2	T983	NetworKIN	0.303615		CLK1	SRRM2	T983	NetworKIN	0.0334017
		CLK2	CLK3	S215	NetworKIN	0.38432		CLK2	CLK3	S215	NetworKIN	0.525117		CLK2	CLK3	S215	NetworKIN	0.744916		CLK2	CLK3	S215	NetworKIN	0.855231
		CLK2	PNN	S66	NetworKIN	0.144164		CLK2	PNN	S66	NetworKIN	0.301284		CLK2	PNN	S66	NetworKIN	-0.400171		CLK2	PNN	S66	NetworKIN	-0.0497723
		CLK2	PNN	S96	NetworKIN	-0.18165		CLK2	PNN	S96	NetworKIN	0.0752395		CLK2	PNN	S96	NetworKIN	-0.211324		CLK2	PNN	S96	NetworKIN	-0.194465
		CLK2	TRA2B	T201	NetworKIN	-0.112778		CLK2	TRA2B	T201	NetworKIN	-0.163097		CLK2	TRA2B	T201	NetworKIN	-0.173618		CLK2	TRA2B	T201	NetworKIN	-0.0685454
		CLK3	CLK3	S215	NetworKIN	0.38432		CLK3	CLK3	S215	NetworKIN	0.525117		CLK3	CLK3	S215	NetworKIN	0.744916		CLK3	CLK3	S215	NetworKIN	0.855231
		CLK3	PRKDC	S893	NetworKIN	-0.200063		CLK3	PRKDC	S893	NetworKIN	-0.0227256		CLK3	PRKDC	S893	NetworKIN	-0.420437		CLK3	PRKDC	S893	NetworKIN	-0.155956
		CSNK1A1	PLEK	S117	NetworKIN	1.0642		CSNK1A1	PLEK	S117	NetworKIN	2.63249		CSNK1A1	PLEK	S117	NetworKIN	0.623806		CSNK1A1	PLEK	S117	NetworKIN	1.11687
		CSNK1A1	AKT1	S124	NetworKIN	-0.195004		CSNK1A1	AKT1	S124	NetworKIN	-0.0287572		CSNK1A1	AKT1	S124	NetworKIN	-0.199384		CSNK1A1	AKT1	S124	NetworKIN	0.219376
		CSNK1A1	NPM1	S125	NetworKIN	-0.0915148		CSNK1A1	NPM1	S125	NetworKIN	-0.107424		CSNK1A1	NPM1	S125	NetworKIN	-0.331386		CSNK1A1	NPM1	S125	NetworKIN	-0.17342
		CSNK1A1	RNF20	S138	NetworKIN	0.0438479		CSNK1A1	RNF20	S138	NetworKIN	0.0261609		CSNK1A1	RNF20	S138	NetworKIN	0.0769597		CSNK1A1	RNF20	S138	NetworKIN	-0.131972
		CSNK1A1	NES	S1418	NetworKIN	-1.40151		CSNK1A1	NES	S1418	NetworKIN	-0.799195		CSNK1A1	NES	S1418	NetworKIN	-0.899512		CSNK1A1	NES	S1418	NetworKIN	-1.38041
		CSNK1A1	CDKN1B	S178	NetworKIN	-0.452264		CSNK1A1	CDKN1B	S178	NetworKIN	0.0206536		CSNK1A1	CDKN1B	S178	NetworKIN	-0.316603		CSNK1A1	CDKN1B	S178	NetworKIN	-0.18725
		CSNK1A1	CLIP1	S200	NetworKIN	-0.607997		CSNK1A1	CLIP1	S200	NetworKIN	-0.627363		CSNK1A1	CLIP1	S200	NetworKIN	-0.42381		CSNK1A1	CLIP1	S200	NetworKIN	-0.239492
		CSNK1A1	CLIP1	S204	NetworKIN	-0.591666		CSNK1A1	CLIP1	S204	NetworKIN	-0.290406		CSNK1A1	CLIP1	S204	NetworKIN	-0.44192		CSNK1A1	CLIP1	S204	NetworKIN	-0.0971192
		CSNK1A1	VIM	S214	NetworKIN	-0.134758		CSNK1A1	VIM	S214	NetworKIN	-0.0714685		CSNK1A1	VIM	S214	NetworKIN	-0.264891		CSNK1A1	VIM	S214	NetworKIN	-0.0681084
		CSNK1A1	APC	S2260	NetworKIN	-0.328261		CSNK1A1	APC	S2260	NetworKIN	-0.332934		CSNK1A1	APC	S2260	NetworKIN	-0.0969007		CSNK1A1	APC	S2260	NetworKIN	-0.0269463
		CSNK1A1	CTNND1	S230	NetworKIN	0.415804		CSNK1A1	CTNND1	S230	NetworKIN	0.147166		CSNK1A1	CTNND1	S230	NetworKIN	0.537149		CSNK1A1	CTNND1	S230	NetworKIN	0.637368
		CSNK1A1	VIM	S25	NetworKIN	0.0198795		CSNK1A1	VIM	S25	NetworKIN	-0.0276061		CSNK1A1	VIM	S25	NetworKIN	0.0472774		CSNK1A1	VIM	S25	NetworKIN	-0.0674513
		CSNK1A1	CTNND1	S252	NetworKIN	0.770788		CSNK1A1	CTNND1	S252	NetworKIN	0.0466873		CSNK1A1	CTNND1	S252	NetworKIN	0.505106		CSNK1A1	CTNND1	S252	NetworKIN	0.526746
		CSNK1A1	PPP1R14A	S26	NetworKIN	-0.883444		CSNK1A1	PPP1R14A	S26	NetworKIN	-1.15492		CSNK1A1	PPP1R14A	S26	NetworKIN	-0.307673		CSNK1A1	PPP1R14A	S26	NetworKIN	-0.142201
		CSNK1A1	RANBP2	S2668	NetworKIN	0.0294753		CSNK1A1	RANBP2	S2668	NetworKIN	0.158153		CSNK1A1	RANBP2	S2668	NetworKIN	0.0356885		CSNK1A1	RANBP2	S2668	NetworKIN	0.0824876
		CSNK1A1	APC	S2674	NetworKIN	0.0863284		CSNK1A1	APC	S2674	NetworKIN	0.223757		CSNK1A1	APC	S2674	NetworKIN	-0.00459946		CSNK1A1	APC	S2674	NetworKIN	0.713875
		CSNK1A1	RAF1	S29	NetworKIN	0.285384		CSNK1A1	RAF1	S29	NetworKIN	0.347605		CSNK1A1	RAF1	S29	NetworKIN	-0.179172		CSNK1A1	RAF1	S29	NetworKIN	0.450777
		CSNK1A1	RANBP2	S2900	NetworKIN	-0.438026		CSNK1A1	RANBP2	S2900	NetworKIN	-0.368951		CSNK1A1	RANBP2	S2900	NetworKIN	-0.417112		CSNK1A1	RANBP2	S2900	NetworKIN	-0.0916013
		CSNK1A1	NDRG1	S333	NetworKIN	-0.397988		CSNK1A1	NDRG1	S333	NetworKIN	-0.244266		CSNK1A1	NDRG1	S333	NetworKIN	-0.563309		CSNK1A1	NDRG1	S333	NetworKIN	-0.41758
		CSNK1A1	CTNND1	S349	NetworKIN	0.258846		CSNK1A1	CTNND1	S349	NetworKIN	-0.328688		CSNK1A1	CTNND1	S349	NetworKIN	0.213249		CSNK1A1	CTNND1	S349	NetworKIN	0.24045
		CSNK1A1	CTNND1	S352	NetworKIN	0.294471		CSNK1A1	CTNND1	S352	NetworKIN	-0.0212281		CSNK1A1	CTNND1	S352	NetworKIN	0.74822		CSNK1A1	CTNND1	S352	NetworKIN	0.377312
		CSNK1A1	GSK3A	S39	NetworKIN	-0.0509955		CSNK1A1	GSK3A	S39	NetworKIN	-0.169628		CSNK1A1	GSK3A	S39	NetworKIN	-0.232374		CSNK1A1	GSK3A	S39	NetworKIN	0.0200915
		CSNK1A1	VIM	S39	NetworKIN	-0.298372		CSNK1A1	VIM	S39	NetworKIN	-0.109572		CSNK1A1	VIM	S39	NetworKIN	-0.214707		CSNK1A1	VIM	S39	NetworKIN	-0.234692
		CSNK1A1	VIM	S409	NetworKIN	0.0262753		CSNK1A1	VIM	S409	NetworKIN	-0.0602087		CSNK1A1	VIM	S409	NetworKIN	-0.120252		CSNK1A1	VIM	S409	NetworKIN	-0.0790235
		CSNK1A1	GSK3A	S41	NetworKIN	0.0461432		CSNK1A1	GSK3A	S41	NetworKIN	-0.00476365		CSNK1A1	GSK3A	S41	NetworKIN	-0.0616279		CSNK1A1	GSK3A	S41	NetworKIN	0.0612594
		CSNK1A1	PPP2R5A	S41	NetworKIN	-0.77292		CSNK1A1	PPP2R5A	S41	NetworKIN	-0.297941		CSNK1A1	PPP2R5A	S41	NetworKIN	-0.310003		CSNK1A1	PPP2R5A	S41	NetworKIN	-0.246877
		CSNK1A1	VIM	S42	NetworKIN	-0.471894		CSNK1A1	VIM	S42	NetworKIN	-0.121956		CSNK1A1	VIM	S42	NetworKIN	-0.19334		CSNK1A1	VIM	S42	NetworKIN	-0.262276
		CSNK1A1	BLM	S422	NetworKIN	-0.535612		CSNK1A1	BLM	S422	NetworKIN	0.0218356		CSNK1A1	BLM	S422	NetworKIN	-0.657134		CSNK1A1	BLM	S422	NetworKIN	-0.470551
		CSNK1A1	VIM	S430	NetworKIN	-0.566129		CSNK1A1	VIM	S430	NetworKIN	-0.148052		CSNK1A1	VIM	S430	NetworKIN	-0.550519		CSNK1A1	VIM	S430	NetworKIN	-0.320284
		CSNK1A1	NUP214	S433	NetworKIN	0.259888		CSNK1A1	NUP214	S433	NetworKIN	0.313603		CSNK1A1	NUP214	S433	NetworKIN	-0.166487		CSNK1A1	NUP214	S433	NetworKIN	0.489428
		CSNK1A1	API5	S464	NetworKIN	-0.217137		CSNK1A1	API5	S464	NetworKIN	-0.0523224		CSNK1A1	API5	S464	NetworKIN	-0.0531693		CSNK1A1	API5	S464	NetworKIN	0.0386797
		CSNK1A1	PPP2R5A	S49	NetworKIN	-0.156536		CSNK1A1	PPP2R5A	S49	NetworKIN	0.315951		CSNK1A1	PPP2R5A	S49	NetworKIN	-0.0387522		CSNK1A1	PPP2R5A	S49	NetworKIN	0.093687
		CSNK1A1	VIM	S51	NetworKIN	0.200946		CSNK1A1	VIM	S51	NetworKIN	0.182836		CSNK1A1	VIM	S51	NetworKIN	0.0859934		CSNK1A1	VIM	S51	NetworKIN	0.21088
		CSNK1A1	EIF2B5	S544	NetworKIN	-0.325886		CSNK1A1	EIF2B5	S544	NetworKIN	-0.317238		CSNK1A1	EIF2B5	S544	NetworKIN	-0.157196		CSNK1A1	EIF2B5	S544	NetworKIN	-0.113107
		CSNK1A1	VIM	S56	NetworKIN	0.0434849		CSNK1A1	VIM	S56	NetworKIN	-0.0523181		CSNK1A1	VIM	S56	NetworKIN	0.0551551		CSNK1A1	VIM	S56	NetworKIN	0.163689
		CSNK1A1	EMD	S60	NetworKIN	-0.0396589		CSNK1A1	EMD	S60	NetworKIN	0.292934		CSNK1A1	EMD	S60	NetworKIN	0.0357878		CSNK1A1	EMD	S60	NetworKIN	0.209438
		CSNK1A1	LMNA	S616	NetworKIN	0.194883		CSNK1A1	LMNA	S616	NetworKIN	0.165823		CSNK1A1	LMNA	S616	NetworKIN	-0.326456		CSNK1A1	LMNA	S616	NetworKIN	-0.0281992
		CSNK1A1	LMNA	S632	NetworKIN	0.697441		CSNK1A1	LMNA	S632	NetworKIN	2.15755		CSNK1A1	LMNA	S632	NetworKIN	0.15503		CSNK1A1	LMNA	S632	NetworKIN	1.16587
		CSNK1A1	LMNA	S636	NetworKIN	-0.227816		CSNK1A1	LMNA	S636	NetworKIN	0.0942329		CSNK1A1	LMNA	S636	NetworKIN	-0.505165		CSNK1A1	LMNA	S636	NetworKIN	-0.251218
		CSNK1A1	CTNNA3	S637	NetworKIN	-0.294772		CSNK1A1	CTNNA3	S637	NetworKIN	-0.441521		CSNK1A1	CTNNA3	S637	NetworKIN	-0.164215		CSNK1A1	CTNNA3	S637	NetworKIN	-0.21025
		CSNK1A1	GYS1	S641	NetworKIN	-0.138167		CSNK1A1	GYS1	S641	NetworKIN	0.119376		CSNK1A1	GYS1	S641	NetworKIN	0.00964814		CSNK1A1	GYS1	S641	NetworKIN	0.136423
		CSNK1A1	CTNNA1	S655	NetworKIN	0.0271721		CSNK1A1	CTNNA1	S655	NetworKIN	0.0977256		CSNK1A1	CTNNA1	S655	NetworKIN	-0.132872		CSNK1A1	CTNNA1	S655	NetworKIN	0.227467
		CSNK1A1	VCL	S721	NetworKIN	-0.205689		CSNK1A1	VCL	S721	NetworKIN	0.102112		CSNK1A1	VCL	S721	NetworKIN	-0.223486		CSNK1A1	VCL	S721	NetworKIN	0.0325985
		CSNK1A1	GYS1	S727	NetworKIN	0.505409		CSNK1A1	GYS1	S727	NetworKIN	0.150474		CSNK1A1	GYS1	S727	NetworKIN	0.188686		CSNK1A1	GYS1	S727	NetworKIN	0.195404
		CSNK1A1	PRKCE	S729	NetworKIN	-0.313427		CSNK1A1	PRKCE	S729	NetworKIN	-0.106405		CSNK1A1	PRKCE	S729	NetworKIN	-0.472386		CSNK1A1	PRKCE	S729	NetworKIN	-0.128153
		CSNK1A1	TBC1D4	S754	NetworKIN	-0.17794		CSNK1A1	TBC1D4	S754	NetworKIN	-0.195837		CSNK1A1	TBC1D4	S754	NetworKIN	-0.204847		CSNK1A1	TBC1D4	S754	NetworKIN	-0.0553822
		CSNK1A1	TNIK	S769	NetworKIN	-0.183129		CSNK1A1	TNIK	S769	NetworKIN	0.0578353		CSNK1A1	TNIK	S769	NetworKIN	-0.193448		CSNK1A1	TNIK	S769	NetworKIN	-0.0280336
		CSNK1A1	PRKAR2A	S78	NetworKIN	0.0231678		CSNK1A1	PRKAR2A	S78	NetworKIN	0.0677798		CSNK1A1	PRKAR2A	S78	NetworKIN	0.00315091		CSNK1A1	PRKAR2A	S78	NetworKIN	0.181608
		CSNK1A1	PRKAR2A	S80	NetworKIN	0.310193		CSNK1A1	PRKAR2A	S80	NetworKIN	0.0535732		CSNK1A1	PRKAR2A	S80	NetworKIN	0.33025		CSNK1A1	PRKAR2A	S80	NetworKIN	0.503573
		CSNK1A1	PRKAR1A	S83	NetworKIN	-0.111736		CSNK1A1	PRKAR1A	S83	NetworKIN	-0.116806		CSNK1A1	PRKAR1A	S83	NetworKIN	-0.0602093		CSNK1A1	PRKAR1A	S83	NetworKIN	-0.0573684
		CSNK1A1	UBE4B	S90	NetworKIN	-0.182951		CSNK1A1	UBE4B	S90	NetworKIN	0.0907639		CSNK1A1	UBE4B	S90	NetworKIN	-0.251246		CSNK1A1	UBE4B	S90	NetworKIN	-0.270305
		CSNK1A1	RANBP2	T1396	NetworKIN	-0.0805312		CSNK1A1	RANBP2	T1396	NetworKIN	0.0640901		CSNK1A1	RANBP2	T1396	NetworKIN	-0.413953		CSNK1A1	RANBP2	T1396	NetworKIN	0.0651634
		CSNK1A1	MAPK14	T180	NetworKIN	-0.406813		CSNK1A1	MAPK14	T180	NetworKIN	0.90324		CSNK1A1	MAPK14	T180	NetworKIN	-0.607261		CSNK1A1	MAPK14	T180	NetworKIN	-0.165013
		CSNK1A1	RANBP2	T2450	NetworKIN	-0.0561162		CSNK1A1	RANBP2	T2450	NetworKIN	-0.372059		CSNK1A1	RANBP2	T2450	NetworKIN	0.105307		CSNK1A1	RANBP2	T2450	NetworKIN	0.0745981
		CSNK1A1	ARAF	T253	NetworKIN	-0.648251		CSNK1A1	ARAF	T253	NetworKIN	-0.849796		CSNK1A1	ARAF	T253	NetworKIN	0.110259		CSNK1A1	ARAF	T253	NetworKIN	0.0520007
		CSNK1A1	PSMD1	T273	NetworKIN	-0.232877		CSNK1A1	PSMD1	T273	NetworKIN	0.0593363		CSNK1A1	PSMD1	T273	NetworKIN	-0.325992		CSNK1A1	PSMD1	T273	NetworKIN	0.749118
		CSNK1A1	PCYT1A	T342	NetworKIN	0.415809		CSNK1A1	PCYT1A	T342	NetworKIN	0.110168		CSNK1A1	PCYT1A	T342	NetworKIN	0.160298		CSNK1A1	PCYT1A	T342	NetworKIN	-0.0211122
		CSNK1A1	RALBP1	T36	NetworKIN	-0.375822		CSNK1A1	RALBP1	T36	NetworKIN	-0.14465		CSNK1A1	RALBP1	T36	NetworKIN	-0.0143239		CSNK1A1	RALBP1	T36	NetworKIN	-0.324854
		CSNK1A1	NUP214	T437	NetworKIN	0.640164		CSNK1A1	NUP214	T437	NetworKIN	1.08743		CSNK1A1	NUP214	T437	NetworKIN	0.165608		CSNK1A1	NUP214	T437	NetworKIN	0.391044
		CSNK1A1	PRKCA	T497	NetworKIN	0.0604465		CSNK1A1	PRKCA	T497	NetworKIN	0.320043		CSNK1A1	PRKCA	T497	NetworKIN	0.0135482		CSNK1A1	PRKCA	T497	NetworKIN	0.0267949
		CSNK1A1	PRKCD	T507	NetworKIN	0.191672		CSNK1A1	PRKCD	T507	NetworKIN	0.938173		CSNK1A1	PRKCD	T507	NetworKIN	0.260866		CSNK1A1	PRKCD	T507	NetworKIN	0.574973
		CSNK1A1	IRS1	T530	NetworKIN	-1.54654		CSNK1A1	IRS1	T530	NetworKIN	-1.38042		CSNK1A1	IRS1	T530	NetworKIN	-0.211666		CSNK1A1	IRS1	T530	NetworKIN	-0.45964
		CSNK1A1	PRKAR2A	T54	NetworKIN	-0.0859097		CSNK1A1	PRKAR2A	T54	NetworKIN	-0.0331573		CSNK1A1	PRKAR2A	T54	NetworKIN	-0.11137		CSNK1A1	PRKAR2A	T54	NetworKIN	-0.0886254
		CSNK1A1	GYS1	T721	NetworKIN	-0.10718		CSNK1A1	GYS1	T721	NetworKIN	-0.0133014		CSNK1A1	GYS1	T721	NetworKIN	-0.199102		CSNK1A1	GYS1	T721	NetworKIN	0.00269832
		CSNK1D	DYNC1I2	S101	NetworKIN	-0.334766		CSNK1D	DYNC1I2	S101	NetworKIN	-0.175183		CSNK1D	DYNC1I2	S101	NetworKIN	-0.272045		CSNK1D	DYNC1I2	S101	NetworKIN	-0.12373
		CSNK1D	CLASP1	S1091	NetworKIN	-0.316505		CSNK1D	CLASP1	S1091	NetworKIN	-0.215312		CSNK1D	CLASP1	S1091	NetworKIN	-0.277838		CSNK1D	CLASP1	S1091	NetworKIN	0.1171
		CSNK1D	PRKAR2B	S114	NetworKIN	0.086834		CSNK1D	PRKAR2B	S114	NetworKIN	0.601125		CSNK1D	PRKAR2B	S114	NetworKIN	0.574247		CSNK1D	PRKAR2B	S114	NetworKIN	0.240406
		CSNK1D	CLASP1	S1196	NetworKIN	-0.103062		CSNK1D	CLASP1	S1196	NetworKIN	-0.0881957		CSNK1D	CLASP1	S1196	NetworKIN	0.0831245		CSNK1D	CLASP1	S1196	NetworKIN	0.163858
		CSNK1D	CLASP1	S1223	NetworKIN	-0.616068		CSNK1D	CLASP1	S1223	NetworKIN	-0.378943		CSNK1D	CLASP1	S1223	NetworKIN	-0.328484		CSNK1D	CLASP1	S1223	NetworKIN	0.126223
		CSNK1D	AKT1	S124	NetworKIN	-0.195004		CSNK1D	AKT1	S124	NetworKIN	-0.0287572		CSNK1D	AKT1	S124	NetworKIN	-0.199384		CSNK1D	AKT1	S124	NetworKIN	0.219376
		CSNK1D	MAP1B	S1265	NetworKIN	-0.0980546		CSNK1D	MAP1B	S1265	NetworKIN	0.145732		CSNK1D	MAP1B	S1265	NetworKIN	-0.0287158		CSNK1D	MAP1B	S1265	NetworKIN	0.248489
		CSNK1D	TACC2	S1313	NetworKIN	-0.0029734		CSNK1D	TACC2	S1313	NetworKIN	0.00750322		CSNK1D	TACC2	S1313	NetworKIN	-0.126453		CSNK1D	TACC2	S1313	NetworKIN	0.0856604
		CSNK1D	CLIP1	S143	NetworKIN	-0.189228		CSNK1D	CLIP1	S143	NetworKIN	-0.0844269		CSNK1D	CLIP1	S143	NetworKIN	-0.0938066		CSNK1D	CLIP1	S143	NetworKIN	0.0292434
		CSNK1D	PCM1	S1730	NetworKIN	-0.359355		CSNK1D	PCM1	S1730	NetworKIN	-0.230049		CSNK1D	PCM1	S1730	NetworKIN	-0.396123		CSNK1D	PCM1	S1730	NetworKIN	-0.286299
		CSNK1D	CDKN1B	S178	NetworKIN	-0.452264		CSNK1D	CDKN1B	S178	NetworKIN	0.0206536		CSNK1D	CDKN1B	S178	NetworKIN	-0.316603		CSNK1D	CDKN1B	S178	NetworKIN	-0.18725
		CSNK1D	MAP1B	S1785	NetworKIN	0.0763027		CSNK1D	MAP1B	S1785	NetworKIN	0.104213		CSNK1D	MAP1B	S1785	NetworKIN	0.402777		CSNK1D	MAP1B	S1785	NetworKIN	0.0925036
		CSNK1D	TACC2	S1947	NetworKIN	-0.0689037		CSNK1D	TACC2	S1947	NetworKIN	-0.00781722		CSNK1D	TACC2	S1947	NetworKIN	-0.0952153		CSNK1D	TACC2	S1947	NetworKIN	-0.463694
		CSNK1D	CHMP2B	S199	NetworKIN	-0.13322		CSNK1D	CHMP2B	S199	NetworKIN	-0.0991354		CSNK1D	CHMP2B	S199	NetworKIN	-0.250491		CSNK1D	CHMP2B	S199	NetworKIN	-0.179344
		CSNK1D	SNAP23	S20	NetworKIN	-0.45159		CSNK1D	SNAP23	S20	NetworKIN	-0.115889		CSNK1D	SNAP23	S20	NetworKIN	-0.0792442		CSNK1D	SNAP23	S20	NetworKIN	0.174631
		CSNK1D	CLIP1	S200	NetworKIN	-0.607997		CSNK1D	CLIP1	S200	NetworKIN	-0.627363		CSNK1D	CLIP1	S200	NetworKIN	-0.42381		CSNK1D	CLIP1	S200	NetworKIN	-0.239492
		CSNK1D	PDE4D	S202	NetworKIN	-0.447513		CSNK1D	PDE4D	S202	NetworKIN	-0.0215312		CSNK1D	PDE4D	S202	NetworKIN	-0.0821682		CSNK1D	PDE4D	S202	NetworKIN	0.131647
		CSNK1D	CLIP1	S204	NetworKIN	-0.591666		CSNK1D	CLIP1	S204	NetworKIN	-0.290406		CSNK1D	CLIP1	S204	NetworKIN	-0.44192		CSNK1D	CLIP1	S204	NetworKIN	-0.0971192
		CSNK1D	MAP1B	S2098	NetworKIN	0.219194		CSNK1D	MAP1B	S2098	NetworKIN	0.305884		CSNK1D	MAP1B	S2098	NetworKIN	-0.0205365		CSNK1D	MAP1B	S2098	NetworKIN	0.336128
		CSNK1D	TACC2	S2317	NetworKIN	-0.361233		CSNK1D	TACC2	S2317	NetworKIN	-0.200735		CSNK1D	TACC2	S2317	NetworKIN	-0.0943858		CSNK1D	TACC2	S2317	NetworKIN	-0.00683885
		CSNK1D	PPP1R14A	S26	NetworKIN	-0.883444		CSNK1D	PPP1R14A	S26	NetworKIN	-1.15492		CSNK1D	PPP1R14A	S26	NetworKIN	-0.307673		CSNK1D	PPP1R14A	S26	NetworKIN	-0.142201
		CSNK1D	APC	S2674	NetworKIN	0.0863284		CSNK1D	APC	S2674	NetworKIN	0.223757		CSNK1D	APC	S2674	NetworKIN	-0.00459946		CSNK1D	APC	S2674	NetworKIN	0.713875
		CSNK1D	SIRT1	S27	NetworKIN	-0.0920039		CSNK1D	SIRT1	S27	NetworKIN	-0.0314975		CSNK1D	SIRT1	S27	NetworKIN	-0.0931311		CSNK1D	SIRT1	S27	NetworKIN	-0.0496328
		CSNK1D	CAMK2B	S280	NetworKIN	0.0336311		CSNK1D	CAMK2B	S280	NetworKIN	0.631659		CSNK1D	CAMK2B	S280	NetworKIN	0.222402		CSNK1D	CAMK2B	S280	NetworKIN	0.390268
		CSNK1D	CLASP1	S280	NetworKIN	0.64336		CSNK1D	CLASP1	S280	NetworKIN	0.615798		CSNK1D	CLASP1	S280	NetworKIN	-0.00134987		CSNK1D	CLASP1	S280	NetworKIN	0.171292
		CSNK1D	FOXO1	S287	NetworKIN	-0.188767		CSNK1D	FOXO1	S287	NetworKIN	-0.208214		CSNK1D	FOXO1	S287	NetworKIN	-0.186232		CSNK1D	FOXO1	S287	NetworKIN	-0.0577884
		CSNK1D	RAF1	S29	NetworKIN	0.285384		CSNK1D	RAF1	S29	NetworKIN	0.347605		CSNK1D	RAF1	S29	NetworKIN	-0.179172		CSNK1D	RAF1	S29	NetworKIN	0.450777
		CSNK1D	CSNK1D	S331	NetworKIN	-1.01356		CSNK1D	CSNK1D	S331	NetworKIN	-0.639915		CSNK1D	CSNK1D	S331	NetworKIN	-0.189755		CSNK1D	CSNK1D	S331	NetworKIN	-0.359888
		CSNK1D	CAMK2D	S333	NetworKIN	-0.137635		CSNK1D	CAMK2D	S333	NetworKIN	0.211022		CSNK1D	CAMK2D	S333	NetworKIN	-0.328143		CSNK1D	CAMK2D	S333	NetworKIN	0.0236544
		CSNK1D	CAMK2B	S367	NetworKIN	0.87854		CSNK1D	CAMK2B	S367	NetworKIN	0.918069		CSNK1D	CAMK2B	S367	NetworKIN	0.12342		CSNK1D	CAMK2B	S367	NetworKIN	1.88622
		CSNK1D	CAMK2B	S397	NetworKIN	0.0458861		CSNK1D	CAMK2B	S397	NetworKIN	-0.0651567		CSNK1D	CAMK2B	S397	NetworKIN	-0.0535214		CSNK1D	CAMK2B	S397	NetworKIN	-0.414087
		CSNK1D	PPP2R5A	S41	NetworKIN	-0.77292		CSNK1D	PPP2R5A	S41	NetworKIN	-0.297941		CSNK1D	PPP2R5A	S41	NetworKIN	-0.310003		CSNK1D	PPP2R5A	S41	NetworKIN	-0.246877
		CSNK1D	TAOK1	S417	NetworKIN	0.5986		CSNK1D	TAOK1	S417	NetworKIN	0.253718		CSNK1D	TAOK1	S417	NetworKIN	-0.0328446		CSNK1D	TAOK1	S417	NetworKIN	0.0955681
		CSNK1D	RAF1	S43	NetworKIN	0.116785		CSNK1D	RAF1	S43	NetworKIN	-0.0508473		CSNK1D	RAF1	S43	NetworKIN	0.0418492		CSNK1D	RAF1	S43	NetworKIN	0.137959
		CSNK1D	DYNC1H1	S4368	NetworKIN	0.663819		CSNK1D	DYNC1H1	S4368	NetworKIN	0.857394		CSNK1D	DYNC1H1	S4368	NetworKIN	0.329815		CSNK1D	DYNC1H1	S4368	NetworKIN	0.799177
		CSNK1D	DYNC1LI2	S446	NetworKIN	-0.179532		CSNK1D	DYNC1LI2	S446	NetworKIN	-0.132044		CSNK1D	DYNC1LI2	S446	NetworKIN	-0.294471		CSNK1D	DYNC1LI2	S446	NetworKIN	0.101364
		CSNK1D	PPP2R5A	S49	NetworKIN	-0.156536		CSNK1D	PPP2R5A	S49	NetworKIN	0.315951		CSNK1D	PPP2R5A	S49	NetworKIN	-0.0387522		CSNK1D	PPP2R5A	S49	NetworKIN	0.093687
		CSNK1D	DYNC1LI1	S516	NetworKIN	0.709355		CSNK1D	DYNC1LI1	S516	NetworKIN	0.984722		CSNK1D	DYNC1LI1	S516	NetworKIN	-0.444801		CSNK1D	DYNC1LI1	S516	NetworKIN	0.267689
		CSNK1D	SIK2	S534	NetworKIN	-0.386969		CSNK1D	SIK2	S534	NetworKIN	-0.0527226		CSNK1D	SIK2	S534	NetworKIN	-0.555824		CSNK1D	SIK2	S534	NetworKIN	0.158995
		CSNK1D	MAP1B	S544	NetworKIN	-0.531161		CSNK1D	MAP1B	S544	NetworKIN	-0.24473		CSNK1D	MAP1B	S544	NetworKIN	-0.898945		CSNK1D	MAP1B	S544	NetworKIN	-0.220689
		CSNK1D	CLASP1	S559	NetworKIN	-0.3547		CSNK1D	CLASP1	S559	NetworKIN	-0.662916		CSNK1D	CLASP1	S559	NetworKIN	-0.335456		CSNK1D	CLASP1	S559	NetworKIN	-0.263625
		CSNK1D	CLASP1	S649	NetworKIN	-0.604381		CSNK1D	CLASP1	S649	NetworKIN	-0.400745		CSNK1D	CLASP1	S649	NetworKIN	-0.649882		CSNK1D	CLASP1	S649	NetworKIN	-0.325015
		CSNK1D	PRKCE	S729	NetworKIN	-0.313427		CSNK1D	PRKCE	S729	NetworKIN	-0.106405		CSNK1D	PRKCE	S729	NetworKIN	-0.472386		CSNK1D	PRKCE	S729	NetworKIN	-0.128153
		CSNK1D	PRKAR2A	S78	NetworKIN	0.0231678		CSNK1D	PRKAR2A	S78	NetworKIN	0.0677798		CSNK1D	PRKAR2A	S78	NetworKIN	0.00315091		CSNK1D	PRKAR2A	S78	NetworKIN	0.181608
		CSNK1D	PRKAR2A	S80	NetworKIN	0.310193		CSNK1D	PRKAR2A	S80	NetworKIN	0.0535732		CSNK1D	PRKAR2A	S80	NetworKIN	0.33025		CSNK1D	PRKAR2A	S80	NetworKIN	0.503573
		CSNK1D	PRKAR1A	S83	NetworKIN	-0.111736		CSNK1D	PRKAR1A	S83	NetworKIN	-0.116806		CSNK1D	PRKAR1A	S83	NetworKIN	-0.0602093		CSNK1D	PRKAR1A	S83	NetworKIN	-0.0573684
		CSNK1D	TAOK1	S9	NetworKIN	0.38332		CSNK1D	TAOK1	S9	NetworKIN	0.125034		CSNK1D	TAOK1	S9	NetworKIN	-0.361952		CSNK1D	TAOK1	S9	NetworKIN	-0.0698129
		CSNK1D	PCM1	S93	NetworKIN	-0.118662		CSNK1D	PCM1	S93	NetworKIN	0.369617		CSNK1D	PCM1	S93	NetworKIN	-0.441866		CSNK1D	PCM1	S93	NetworKIN	0.124312
		CSNK1D	TACC2	S962	NetworKIN	0.151337		CSNK1D	TACC2	S962	NetworKIN	-0.163795		CSNK1D	TACC2	S962	NetworKIN	0.129811		CSNK1D	TACC2	S962	NetworKIN	0.248832
		CSNK1D	TJP1	S968	NetworKIN	-0.00691165		CSNK1D	TJP1	S968	NetworKIN	0.178579		CSNK1D	TJP1	S968	NetworKIN	-0.224495		CSNK1D	TJP1	S968	NetworKIN	0.0863807
		CSNK1D	MAP2	T1605	NetworKIN	-0.0210523		CSNK1D	MAP2	T1605	NetworKIN	0.254		CSNK1D	MAP2	T1605	NetworKIN	0.07155		CSNK1D	MAP2	T1605	NetworKIN	0.0483895
		CSNK1D	MAP1B	T1788	NetworKIN	-0.602114		CSNK1D	MAP1B	T1788	NetworKIN	-0.211821		CSNK1D	MAP1B	T1788	NetworKIN	-0.255647		CSNK1D	MAP1B	T1788	NetworKIN	-0.512466
		CSNK1D	CLIP1	T182	NetworKIN	-0.645717		CSNK1D	CLIP1	T182	NetworKIN	-0.429814		CSNK1D	CLIP1	T182	NetworKIN	-0.541343		CSNK1D	CLIP1	T182	NetworKIN	-0.537954
		CSNK1D	ARAF	T253	NetworKIN	-0.648251		CSNK1D	ARAF	T253	NetworKIN	-0.849796		CSNK1D	ARAF	T253	NetworKIN	0.110259		CSNK1D	ARAF	T253	NetworKIN	0.0520007
		CSNK1D	CAMK2D	T337	NetworKIN	-0.211437		CSNK1D	CAMK2D	T337	NetworKIN	-0.00500961		CSNK1D	CAMK2D	T337	NetworKIN	-0.385476		CSNK1D	CAMK2D	T337	NetworKIN	-0.190217
		CSNK1D	PCYT1A	T342	NetworKIN	0.415809		CSNK1D	PCYT1A	T342	NetworKIN	0.110168		CSNK1D	PCYT1A	T342	NetworKIN	0.160298		CSNK1D	PCYT1A	T342	NetworKIN	-0.0211122
		CSNK1D	CAMK2B	T400	NetworKIN	-0.371741		CSNK1D	CAMK2B	T400	NetworKIN	-0.098834		CSNK1D	CAMK2B	T400	NetworKIN	-0.41436		CSNK1D	CAMK2B	T400	NetworKIN	-0.532754
		CSNK1D	PRKCA	T497	NetworKIN	0.0604465		CSNK1D	PRKCA	T497	NetworKIN	0.320043		CSNK1D	PRKCA	T497	NetworKIN	0.0135482		CSNK1D	PRKCA	T497	NetworKIN	0.0267949
		CSNK1D	DYNC1LI1	T513	NetworKIN	0.136823		CSNK1D	DYNC1LI1	T513	NetworKIN	0.330164		CSNK1D	DYNC1LI1	T513	NetworKIN	-0.20376		CSNK1D	DYNC1LI1	T513	NetworKIN	0.641438
		CSNK1D	DYNC1LI1	T515	NetworKIN	0.244963		CSNK1D	DYNC1LI1	T515	NetworKIN	0.782951		CSNK1D	DYNC1LI1	T515	NetworKIN	0.128025		CSNK1D	DYNC1LI1	T515	NetworKIN	0.535565
		CSNK1D	DYNC1I2	T95	NetworKIN	-0.28441		CSNK1D	DYNC1I2	T95	NetworKIN	-0.0690465		CSNK1D	DYNC1I2	T95	NetworKIN	-0.30675		CSNK1D	DYNC1I2	T95	NetworKIN	0.0837764
		CSNK1E	DYNC1I2	S101	NetworKIN	-0.334766		CSNK1E	DYNC1I2	S101	NetworKIN	-0.175183		CSNK1E	DYNC1I2	S101	NetworKIN	-0.272045		CSNK1E	DYNC1I2	S101	NetworKIN	-0.12373
		CSNK1E	CLASP1	S1091	NetworKIN	-0.316505		CSNK1E	CLASP1	S1091	NetworKIN	-0.215312		CSNK1E	CLASP1	S1091	NetworKIN	-0.277838		CSNK1E	CLASP1	S1091	NetworKIN	0.1171
		CSNK1E	PRKAR2B	S114	NetworKIN	0.086834		CSNK1E	PRKAR2B	S114	NetworKIN	0.601125		CSNK1E	PRKAR2B	S114	NetworKIN	0.574247		CSNK1E	PRKAR2B	S114	NetworKIN	0.240406
		CSNK1E	CLASP1	S1196	NetworKIN	-0.103062		CSNK1E	CLASP1	S1196	NetworKIN	-0.0881957		CSNK1E	CLASP1	S1196	NetworKIN	0.0831245		CSNK1E	CLASP1	S1196	NetworKIN	0.163858
		CSNK1E	CLASP1	S1223	NetworKIN	-0.616068		CSNK1E	CLASP1	S1223	NetworKIN	-0.378943		CSNK1E	CLASP1	S1223	NetworKIN	-0.328484		CSNK1E	CLASP1	S1223	NetworKIN	0.126223
		CSNK1E	APC	S2260	NetworKIN	-0.328261		CSNK1E	APC	S2260	NetworKIN	-0.332934		CSNK1E	APC	S2260	NetworKIN	-0.0969007		CSNK1E	APC	S2260	NetworKIN	-0.0269463
		CSNK1E	PPP1R14A	S26	NetworKIN	-0.883444		CSNK1E	PPP1R14A	S26	NetworKIN	-1.15492		CSNK1E	PPP1R14A	S26	NetworKIN	-0.307673		CSNK1E	PPP1R14A	S26	NetworKIN	-0.142201
		CSNK1E	APC	S2674	NetworKIN	0.0863284		CSNK1E	APC	S2674	NetworKIN	0.223757		CSNK1E	APC	S2674	NetworKIN	-0.00459946		CSNK1E	APC	S2674	NetworKIN	0.713875
		CSNK1E	CLASP1	S280	NetworKIN	0.64336		CSNK1E	CLASP1	S280	NetworKIN	0.615798		CSNK1E	CLASP1	S280	NetworKIN	-0.00134987		CSNK1E	CLASP1	S280	NetworKIN	0.171292
		CSNK1E	FOXO1	S287	NetworKIN	-0.188767		CSNK1E	FOXO1	S287	NetworKIN	-0.208214		CSNK1E	FOXO1	S287	NetworKIN	-0.186232		CSNK1E	FOXO1	S287	NetworKIN	-0.0577884
		CSNK1E	FOXO1	S319	NetworKIN	-0.197674		CSNK1E	FOXO1	S319	NetworKIN	-0.149638		CSNK1E	FOXO1	S319	NetworKIN	0.0168004		CSNK1E	FOXO1	S319	NetworKIN	0.167697
		CSNK1E	CSNK1D	S331	NetworKIN	-1.01356		CSNK1E	CSNK1D	S331	NetworKIN	-0.639915		CSNK1E	CSNK1D	S331	NetworKIN	-0.189755		CSNK1E	CSNK1D	S331	NetworKIN	-0.359888
		CSNK1E	DYNC1H1	S4368	NetworKIN	0.663819		CSNK1E	DYNC1H1	S4368	NetworKIN	0.857394		CSNK1E	DYNC1H1	S4368	NetworKIN	0.329815		CSNK1E	DYNC1H1	S4368	NetworKIN	0.799177
		CSNK1E	CLASP1	S559	NetworKIN	-0.3547		CSNK1E	CLASP1	S559	NetworKIN	-0.662916		CSNK1E	CLASP1	S559	NetworKIN	-0.335456		CSNK1E	CLASP1	S559	NetworKIN	-0.263625
		CSNK1E	CLASP1	S572	NetworKIN	0.595413		CSNK1E	CLASP1	S572	NetworKIN	0.138499		CSNK1E	CLASP1	S572	NetworKIN	0.578692		CSNK1E	CLASP1	S572	NetworKIN	1.16464
		CSNK1E	CLASP1	S600	NetworKIN	-0.13849		CSNK1E	CLASP1	S600	NetworKIN	-0.159591		CSNK1E	CLASP1	S600	NetworKIN	-0.23388		CSNK1E	CLASP1	S600	NetworKIN	-0.132912
		CSNK1E	CLASP1	S649	NetworKIN	-0.604381		CSNK1E	CLASP1	S649	NetworKIN	-0.400745		CSNK1E	CLASP1	S649	NetworKIN	-0.649882		CSNK1E	CLASP1	S649	NetworKIN	-0.325015
		CSNK1E	CLASP1	S714	NetworKIN	0.339619		CSNK1E	CLASP1	S714	NetworKIN	-0.0560427		CSNK1E	CLASP1	S714	NetworKIN	0.529855		CSNK1E	CLASP1	S714	NetworKIN	0.121876
		CSNK1E	DYNC1I2	T95	NetworKIN	-0.28441		CSNK1E	DYNC1I2	T95	NetworKIN	-0.0690465		CSNK1E	DYNC1I2	T95	NetworKIN	-0.30675		CSNK1E	DYNC1I2	T95	NetworKIN	0.0837764
		CSNK1G1	DIDO1	S1456	NetworKIN	0.0544467		CSNK1G1	DIDO1	S1456	NetworKIN	0.44604		CSNK1G1	DIDO1	S1456	NetworKIN	-0.0931803		CSNK1G1	DIDO1	S1456	NetworKIN	0.197651
		CSNK1G1	GSK3A	S21	NetworKIN	-0.0101347		CSNK1G1	GSK3A	S21	NetworKIN	-0.033481		CSNK1G1	GSK3A	S21	NetworKIN	-0.199225		CSNK1G1	GSK3A	S21	NetworKIN	0.0790358
		CSNK1G1	PPP1R14A	S26	NetworKIN	-0.883444		CSNK1G1	PPP1R14A	S26	NetworKIN	-1.15492		CSNK1G1	PPP1R14A	S26	NetworKIN	-0.307673		CSNK1G1	PPP1R14A	S26	NetworKIN	-0.142201
		CSNK1G1	FOXO1	S287	NetworKIN	-0.188767		CSNK1G1	FOXO1	S287	NetworKIN	-0.208214		CSNK1G1	FOXO1	S287	NetworKIN	-0.186232		CSNK1G1	FOXO1	S287	NetworKIN	-0.0577884
		CSNK1G1	FOXO1	S319	NetworKIN	-0.197674		CSNK1G1	FOXO1	S319	NetworKIN	-0.149638		CSNK1G1	FOXO1	S319	NetworKIN	0.0168004		CSNK1G1	FOXO1	S319	NetworKIN	0.167697
		CSNK1G1	CSNK1G1	S361	NetworKIN	-0.242318		CSNK1G1	CSNK1G1	S361	NetworKIN	-0.0419682		CSNK1G1	CSNK1G1	S361	NetworKIN	-0.348585		CSNK1G1	CSNK1G1	S361	NetworKIN	0.0296287
		CSNK1G1	GSK3A	S39	NetworKIN	-0.0509955		CSNK1G1	GSK3A	S39	NetworKIN	-0.169628		CSNK1G1	GSK3A	S39	NetworKIN	-0.232374		CSNK1G1	GSK3A	S39	NetworKIN	0.0200915
		CSNK1G1	GSK3A	S41	NetworKIN	0.0461432		CSNK1G1	GSK3A	S41	NetworKIN	-0.00476365		CSNK1G1	GSK3A	S41	NetworKIN	-0.0616279		CSNK1G1	GSK3A	S41	NetworKIN	0.0612594
		CSNK1G2	CDKN1B	S178	NetworKIN	-0.452264		CSNK1G2	CDKN1B	S178	NetworKIN	0.0206536		CSNK1G2	CDKN1B	S178	NetworKIN	-0.316603		CSNK1G2	CDKN1B	S178	NetworKIN	-0.18725
		CSNK1G2	PPP1R14A	S26	NetworKIN	-0.883444		CSNK1G2	PPP1R14A	S26	NetworKIN	-1.15492		CSNK1G2	PPP1R14A	S26	NetworKIN	-0.307673		CSNK1G2	PPP1R14A	S26	NetworKIN	-0.142201
		CSNK1G2	FOXO1	S287	NetworKIN	-0.188767		CSNK1G2	FOXO1	S287	NetworKIN	-0.208214		CSNK1G2	FOXO1	S287	NetworKIN	-0.186232		CSNK1G2	FOXO1	S287	NetworKIN	-0.0577884
		CSNK1G2	FOXO1	S319	NetworKIN	-0.197674		CSNK1G2	FOXO1	S319	NetworKIN	-0.149638		CSNK1G2	FOXO1	S319	NetworKIN	0.0168004		CSNK1G2	FOXO1	S319	NetworKIN	0.167697
		CSNK1G2	NCK1	S85	NetworKIN	-0.180263		CSNK1G2	NCK1	S85	NetworKIN	-0.0940062		CSNK1G2	NCK1	S85	NetworKIN	-0.296493		CSNK1G2	NCK1	S85	NetworKIN	-0.089135
		CSNK1G3	PPP1R14A	S26	NetworKIN	-0.883444		CSNK1G3	PPP1R14A	S26	NetworKIN	-1.15492		CSNK1G3	PPP1R14A	S26	NetworKIN	-0.307673		CSNK1G3	PPP1R14A	S26	NetworKIN	-0.142201
		CSNK1G3	FOXO1	S287	NetworKIN	-0.188767		CSNK1G3	FOXO1	S287	NetworKIN	-0.208214		CSNK1G3	FOXO1	S287	NetworKIN	-0.186232		CSNK1G3	FOXO1	S287	NetworKIN	-0.0577884
		CSNK1G3	FOXO1	S319	NetworKIN	-0.197674		CSNK1G3	FOXO1	S319	NetworKIN	-0.149638		CSNK1G3	FOXO1	S319	NetworKIN	0.0168004		CSNK1G3	FOXO1	S319	NetworKIN	0.167697
		CSNK2A1	MAP1B	S1016	NetworKIN	-0.389653		CSNK2A1	MAP1B	S1016	NetworKIN	-0.25666		CSNK2A1	MAP1B	S1016	NetworKIN	-0.232579		CSNK2A1	MAP1B	S1016	NetworKIN	-0.0334273
		CSNK2A1	EEF1B2	S106	NetworKIN	0.0267522		CSNK2A1	EEF1B2	S106	NetworKIN	0.0658668		CSNK2A1	EEF1B2	S106	NetworKIN	0.182189		CSNK2A1	EEF1B2	S106	NetworKIN	0.314231
		CSNK2A1	EIF5B	S107	NetworKIN	0.259557		CSNK2A1	EIF5B	S107	NetworKIN	0.419578		CSNK2A1	EIF5B	S107	NetworKIN	0.135104		CSNK2A1	EIF5B	S107	NetworKIN	0.399882
		CSNK2A1	SSR3	S11	NetworKIN	0.198455		CSNK2A1	SSR3	S11	NetworKIN	0.279231		CSNK2A1	SSR3	S11	NetworKIN	0.106474		CSNK2A1	SSR3	S11	NetworKIN	0.310401
		CSNK2A1	EIF5B	S113	NetworKIN	-0.109184		CSNK2A1	EIF5B	S113	NetworKIN	-0.114456		CSNK2A1	EIF5B	S113	NetworKIN	-0.0854082		CSNK2A1	EIF5B	S113	NetworKIN	-0.0996314
		CSNK2A1	STX4	S117	NetworKIN	-0.174063		CSNK2A1	STX4	S117	NetworKIN	-0.204472		CSNK2A1	STX4	S117	NetworKIN	-0.151386		CSNK2A1	STX4	S117	NetworKIN	-0.109865
		CSNK2A1	CLN3	S12	NetworKIN	-0.226165		CSNK2A1	CLN3	S12	NetworKIN	-0.107036		CSNK2A1	CLN3	S12	NetworKIN	-0.134331		CSNK2A1	CLN3	S12	NetworKIN	-0.128474
		CSNK2A1	EIF3B	S125	NetworKIN	-0.401541		CSNK2A1	EIF3B	S125	NetworKIN	-0.517		CSNK2A1	EIF3B	S125	NetworKIN	-0.833512		CSNK2A1	EIF3B	S125	NetworKIN	-0.907811
		CSNK2A1	NAP1L4	S125	NetworKIN	-0.0522864		CSNK2A1	NAP1L4	S125	NetworKIN	-0.02102		CSNK2A1	NAP1L4	S125	NetworKIN	0.190119		CSNK2A1	NAP1L4	S125	NetworKIN	0.142771
		CSNK2A1	NPM1	S125	NetworKIN	-0.0915148		CSNK2A1	NPM1	S125	NetworKIN	-0.107424		CSNK2A1	NPM1	S125	NetworKIN	-0.331386		CSNK2A1	NPM1	S125	NetworKIN	-0.17342
		CSNK2A1	GBF1	S1298	NetworKIN	-0.03374		CSNK2A1	GBF1	S1298	NetworKIN	-0.049063		CSNK2A1	GBF1	S1298	NetworKIN	0.0162257		CSNK2A1	GBF1	S1298	NetworKIN	-0.0563579
		CSNK2A1	GBF1	S1318	NetworKIN	-0.299629		CSNK2A1	GBF1	S1318	NetworKIN	-0.0683795		CSNK2A1	GBF1	S1318	NetworKIN	-0.338463		CSNK2A1	GBF1	S1318	NetworKIN	0.0991147
		CSNK2A1	INPPL1	S132	NetworKIN	-0.101214		CSNK2A1	INPPL1	S132	NetworKIN	-0.0883583		CSNK2A1	INPPL1	S132	NetworKIN	0.0318894		CSNK2A1	INPPL1	S132	NetworKIN	0.0392569
		CSNK2A1	STX4	S14	NetworKIN	0.250312		CSNK2A1	STX4	S14	NetworKIN	-0.0376809		CSNK2A1	STX4	S14	NetworKIN	0.188462		CSNK2A1	STX4	S14	NetworKIN	0.0789734
		CSNK2A1	NES	S1418	NetworKIN	-1.40151		CSNK2A1	NES	S1418	NetworKIN	-0.799195		CSNK2A1	NES	S1418	NetworKIN	-0.899512		CSNK2A1	NES	S1418	NetworKIN	-1.38041
		CSNK2A1	MAP1B	S1427	NetworKIN	-0.0730376		CSNK2A1	MAP1B	S1427	NetworKIN	-0.484009		CSNK2A1	MAP1B	S1427	NetworKIN	0.126065		CSNK2A1	MAP1B	S1427	NetworKIN	0.145225
		CSNK2A1	MYLK	S1438	NetworKIN	-0.0392133		CSNK2A1	MYLK	S1438	NetworKIN	-0.0178113		CSNK2A1	MYLK	S1438	NetworKIN	-0.0647306		CSNK2A1	MYLK	S1438	NetworKIN	0.102679
		CSNK2A1	ING4	S150	NetworKIN	-0.200917		CSNK2A1	ING4	S150	NetworKIN	-0.172407		CSNK2A1	ING4	S150	NetworKIN	-0.113457		CSNK2A1	ING4	S150	NetworKIN	-0.392007
		CSNK2A1	SMARCA2	S1572	NetworKIN	-0.212928		CSNK2A1	SMARCA2	S1572	NetworKIN	0.0348278		CSNK2A1	SMARCA2	S1572	NetworKIN	-0.0981198		CSNK2A1	SMARCA2	S1572	NetworKIN	0.265841
		CSNK2A1	LEO1	S162	NetworKIN	-0.36303		CSNK2A1	LEO1	S162	NetworKIN	0.00355131		CSNK2A1	LEO1	S162	NetworKIN	-0.0767884		CSNK2A1	LEO1	S162	NetworKIN	-0.0770085
		CSNK2A1	EIF5B	S164	NetworKIN	-0.0807717		CSNK2A1	EIF5B	S164	NetworKIN	-0.140871		CSNK2A1	EIF5B	S164	NetworKIN	-0.0770984		CSNK2A1	EIF5B	S164	NetworKIN	-0.0559458
		CSNK2A1	YBX1	S165	NetworKIN	0.113589		CSNK2A1	YBX1	S165	NetworKIN	-0.123269		CSNK2A1	YBX1	S165	NetworKIN	-0.144898		CSNK2A1	YBX1	S165	NetworKIN	0.116986
		CSNK2A1	EIF3C	S166	NetworKIN	-0.104844		CSNK2A1	EIF3C	S166	NetworKIN	-0.218956		CSNK2A1	EIF3C	S166	NetworKIN	-0.212209		CSNK2A1	EIF3C	S166	NetworKIN	-0.123841
		CSNK2A1	YBX1	S167	NetworKIN	-0.500965		CSNK2A1	YBX1	S167	NetworKIN	0.00631772		CSNK2A1	YBX1	S167	NetworKIN	-0.43802		CSNK2A1	YBX1	S167	NetworKIN	-0.430294
		CSNK2A1	YBX1	S176	NetworKIN	-0.306574		CSNK2A1	YBX1	S176	NetworKIN	-0.259478		CSNK2A1	YBX1	S176	NetworKIN	-0.250514		CSNK2A1	YBX1	S176	NetworKIN	-0.30502
		CSNK2A1	MAP1B	S1772	NetworKIN	-0.0100251		CSNK2A1	MAP1B	S1772	NetworKIN	0.202755		CSNK2A1	MAP1B	S1772	NetworKIN	0.19807		CSNK2A1	MAP1B	S1772	NetworKIN	0.203484
		CSNK2A1	PDAP1	S19	NetworKIN	-0.23444		CSNK2A1	PDAP1	S19	NetworKIN	-0.149669		CSNK2A1	PDAP1	S19	NetworKIN	-0.295579		CSNK2A1	PDAP1	S19	NetworKIN	-0.0300884
		CSNK2A1	HUWE1	S1907	NetworKIN	-0.225509		CSNK2A1	HUWE1	S1907	NetworKIN	-0.212979		CSNK2A1	HUWE1	S1907	NetworKIN	-0.25189		CSNK2A1	HUWE1	S1907	NetworKIN	-0.279694
		CSNK2A1	MYO18A	S1970	NetworKIN	0.117629		CSNK2A1	MYO18A	S1970	NetworKIN	0.423411		CSNK2A1	MYO18A	S1970	NetworKIN	-0.258961		CSNK2A1	MYO18A	S1970	NetworKIN	0.303567
		CSNK2A1	PPID	S198	NetworKIN	0.188444		CSNK2A1	PPID	S198	NetworKIN	0.166033		CSNK2A1	PPID	S198	NetworKIN	-0.0547398		CSNK2A1	PPID	S198	NetworKIN	0.277093
		CSNK2A1	MYO18A	S2020	NetworKIN	0.199423		CSNK2A1	MYO18A	S2020	NetworKIN	0.0484215		CSNK2A1	MYO18A	S2020	NetworKIN	0.138985		CSNK2A1	MYO18A	S2020	NetworKIN	-0.04529
		CSNK2A1	EIF5B	S214	NetworKIN	-0.0377871		CSNK2A1	EIF5B	S214	NetworKIN	0.0330952		CSNK2A1	EIF5B	S214	NetworKIN	-0.0398226		CSNK2A1	EIF5B	S214	NetworKIN	-0.0276818
		CSNK2A1	EIF4B	S219	NetworKIN	-0.745652		CSNK2A1	EIF4B	S219	NetworKIN	-0.245216		CSNK2A1	EIF4B	S219	NetworKIN	-0.601009		CSNK2A1	EIF4B	S219	NetworKIN	-0.453556
		CSNK2A1	APC	S2260	NetworKIN	-0.328261		CSNK2A1	APC	S2260	NetworKIN	-0.332934		CSNK2A1	APC	S2260	NetworKIN	-0.0969007		CSNK2A1	APC	S2260	NetworKIN	-0.0269463
		CSNK2A1	HNRNPC	S233	NetworKIN	-0.338632		CSNK2A1	HNRNPC	S233	NetworKIN	0.160462		CSNK2A1	HNRNPC	S233	NetworKIN	-0.0577506		CSNK2A1	HNRNPC	S233	NetworKIN	0.0139997
		CSNK2A1	PSMA3	S243	NetworKIN	-0.170023		CSNK2A1	PSMA3	S243	NetworKIN	-0.121971		CSNK2A1	PSMA3	S243	NetworKIN	0.035573		CSNK2A1	PSMA3	S243	NetworKIN	-0.0975184
		CSNK2A1	PSMA3	S250	NetworKIN	0.111206		CSNK2A1	PSMA3	S250	NetworKIN	0.00913933		CSNK2A1	PSMA3	S250	NetworKIN	0.0485348		CSNK2A1	PSMA3	S250	NetworKIN	0.00319749
		CSNK2A1	HSP90AB1	S261	NetworKIN	-0.00317863		CSNK2A1	HSP90AB1	S261	NetworKIN	-0.0583915		CSNK2A1	HSP90AB1	S261	NetworKIN	0.168381		CSNK2A1	HSP90AB1	S261	NetworKIN	0.132415
		CSNK2A1	RANBP2	S2668	NetworKIN	0.0294753		CSNK2A1	RANBP2	S2668	NetworKIN	0.158153		CSNK2A1	RANBP2	S2668	NetworKIN	0.0356885		CSNK2A1	RANBP2	S2668	NetworKIN	0.0824876
		CSNK2A1	M6PR	S267	NetworKIN	-0.615035		CSNK2A1	M6PR	S267	NetworKIN	-0.0547896		CSNK2A1	M6PR	S267	NetworKIN	0.0358127		CSNK2A1	M6PR	S267	NetworKIN	-0.127117
		CSNK2A1	CTNND1	S268	NetworKIN	0.135207		CSNK2A1	CTNND1	S268	NetworKIN	-0.143513		CSNK2A1	CTNND1	S268	NetworKIN	0.0607657		CSNK2A1	CTNND1	S268	NetworKIN	0.169687
		CSNK2A1	AQP4	S276	NetworKIN	1.15341		CSNK2A1	AQP4	S276	NetworKIN	0.545275		CSNK2A1	AQP4	S276	NetworKIN	0.577033		CSNK2A1	AQP4	S276	NetworKIN	0.744179
		CSNK2A1	AQP4	S285	NetworKIN	0.597668		CSNK2A1	AQP4	S285	NetworKIN	0.0330761		CSNK2A1	AQP4	S285	NetworKIN	0.13473		CSNK2A1	AQP4	S285	NetworKIN	0.359253
		CSNK2A1	RALY	S288	NetworKIN	-0.0845163		CSNK2A1	RALY	S288	NetworKIN	-0.192337		CSNK2A1	RALY	S288	NetworKIN	0.0710624		CSNK2A1	RALY	S288	NetworKIN	-0.140583
		CSNK2A1	RANBP2	S2900	NetworKIN	-0.438026		CSNK2A1	RANBP2	S2900	NetworKIN	-0.368951		CSNK2A1	RANBP2	S2900	NetworKIN	-0.417112		CSNK2A1	RANBP2	S2900	NetworKIN	-0.0916013
		CSNK2A1	HNRNPC	S299	NetworKIN	-0.804536		CSNK2A1	HNRNPC	S299	NetworKIN	0.194843		CSNK2A1	HNRNPC	S299	NetworKIN	-0.614343		CSNK2A1	HNRNPC	S299	NetworKIN	0.137164
		CSNK2A1	PURB	S304	NetworKIN	-0.1476		CSNK2A1	PURB	S304	NetworKIN	-0.0807568		CSNK2A1	PURB	S304	NetworKIN	-0.137913		CSNK2A1	PURB	S304	NetworKIN	-0.00832259
		CSNK2A1	HNRNPC	S306	NetworKIN	0.690994		CSNK2A1	HNRNPC	S306	NetworKIN	0.0495574		CSNK2A1	HNRNPC	S306	NetworKIN	0.738648		CSNK2A1	HNRNPC	S306	NetworKIN	0.266856
		CSNK2A1	HSP90B1	S306	NetworKIN	-0.0171208		CSNK2A1	HSP90B1	S306	NetworKIN	0.158277		CSNK2A1	HSP90B1	S306	NetworKIN	-0.0584233		CSNK2A1	HSP90B1	S306	NetworKIN	0.096271
		CSNK2A1	YBX1	S314	NetworKIN	-0.00295633		CSNK2A1	YBX1	S314	NetworKIN	-0.096391		CSNK2A1	YBX1	S314	NetworKIN	-0.138774		CSNK2A1	YBX1	S314	NetworKIN	-0.211016
		CSNK2A1	DEK	S32	NetworKIN	0.0577089		CSNK2A1	DEK	S32	NetworKIN	0.218606		CSNK2A1	DEK	S32	NetworKIN	0.306957		CSNK2A1	DEK	S32	NetworKIN	0.217159
		CSNK2A1	SERBP1	S330	NetworKIN	-0.371199		CSNK2A1	SERBP1	S330	NetworKIN	-0.0147738		CSNK2A1	SERBP1	S330	NetworKIN	-0.197137		CSNK2A1	SERBP1	S330	NetworKIN	-0.301403
		CSNK2A1	ZBTB7A	S337	NetworKIN	0.334822		CSNK2A1	ZBTB7A	S337	NetworKIN	-0.098237		CSNK2A1	ZBTB7A	S337	NetworKIN	0.174713		CSNK2A1	ZBTB7A	S337	NetworKIN	-0.120474
		CSNK2A1	CAV1	S37	NetworKIN	0.0594972		CSNK2A1	CAV1	S37	NetworKIN	-0.0155662		CSNK2A1	CAV1	S37	NetworKIN	-0.0691817		CSNK2A1	CAV1	S37	NetworKIN	0.138155
		CSNK2A1	IWS1	S377	NetworKIN	0.00117288		CSNK2A1	IWS1	S377	NetworKIN	0.0514658		CSNK2A1	IWS1	S377	NetworKIN	0.234566		CSNK2A1	IWS1	S377	NetworKIN	-0.13192
		CSNK2A1	EIF3C	S39	NetworKIN	0.0197301		CSNK2A1	EIF3C	S39	NetworKIN	0.0324876		CSNK2A1	EIF3C	S39	NetworKIN	0.0130465		CSNK2A1	EIF3C	S39	NetworKIN	0.0552554
		CSNK2A1	HDAC1	S393	NetworKIN	0.654851		CSNK2A1	HDAC1	S393	NetworKIN	0.0987941		CSNK2A1	HDAC1	S393	NetworKIN	-0.0572387		CSNK2A1	HDAC1	S393	NetworKIN	0.450716
		CSNK2A1	GSK3A	S41	NetworKIN	0.0461432		CSNK2A1	GSK3A	S41	NetworKIN	-0.00476365		CSNK2A1	GSK3A	S41	NetworKIN	-0.0616279		CSNK2A1	GSK3A	S41	NetworKIN	0.0612594
		CSNK2A1	MTDH	S426	NetworKIN	-0.153757		CSNK2A1	MTDH	S426	NetworKIN	-0.143141		CSNK2A1	MTDH	S426	NetworKIN	-0.0518555		CSNK2A1	MTDH	S426	NetworKIN	-0.0694849
		CSNK2A1	VAMP3	S44	NetworKIN	0.915883		CSNK2A1	VAMP3	S44	NetworKIN	0.55746		CSNK2A1	VAMP3	S44	NetworKIN	0.395936		CSNK2A1	VAMP3	S44	NetworKIN	0.188276
		CSNK2A1	EEF2K	S470	NetworKIN	-0.473408		CSNK2A1	EEF2K	S470	NetworKIN	-0.0792607		CSNK2A1	EEF2K	S470	NetworKIN	0.0865951		CSNK2A1	EEF2K	S470	NetworKIN	0.290301
		CSNK2A1	DKC1	S494	NetworKIN	-0.485494		CSNK2A1	DKC1	S494	NetworKIN	0.0131931		CSNK2A1	DKC1	S494	NetworKIN	-0.253594		CSNK2A1	DKC1	S494	NetworKIN	-0.0104028
		CSNK2A1	HDAC4	S565	NetworKIN	-0.214542		CSNK2A1	HDAC4	S565	NetworKIN	0.0216599		CSNK2A1	HDAC4	S565	NetworKIN	-0.157839		CSNK2A1	HDAC4	S565	NetworKIN	0.0351156
		CSNK2A1	NOP56	S570	NetworKIN	-0.241293		CSNK2A1	NOP56	S570	NetworKIN	-0.154123		CSNK2A1	NOP56	S570	NetworKIN	-0.427752		CSNK2A1	NOP56	S570	NetworKIN	-0.206604
		CSNK2A1	NES	S578	NetworKIN	-0.957478		CSNK2A1	NES	S578	NetworKIN	-0.63197		CSNK2A1	NES	S578	NetworKIN	-0.708816		CSNK2A1	NES	S578	NetworKIN	-0.908015
		CSNK2A1	PAK2	S58	NetworKIN	0.0620645		CSNK2A1	PAK2	S58	NetworKIN	1.59655		CSNK2A1	PAK2	S58	NetworKIN	-0.189136		CSNK2A1	PAK2	S58	NetworKIN	0.777607
		CSNK2A1	SUB1	S58	NetworKIN	0.165672		CSNK2A1	SUB1	S58	NetworKIN	0.0797672		CSNK2A1	SUB1	S58	NetworKIN	-0.0632785		CSNK2A1	SUB1	S58	NetworKIN	0.00321792
		CSNK2A1	VAMP3	S58	NetworKIN	-0.221596		CSNK2A1	VAMP3	S58	NetworKIN	0.0571713		CSNK2A1	VAMP3	S58	NetworKIN	-0.292891		CSNK2A1	VAMP3	S58	NetworKIN	0.0633991
		CSNK2A1	PRPF3	S619	NetworKIN	-0.189471		CSNK2A1	PRPF3	S619	NetworKIN	-0.0636295		CSNK2A1	PRPF3	S619	NetworKIN	0.0757599		CSNK2A1	PRPF3	S619	NetworKIN	-0.0420006
		CSNK2A1	IRS1	S629	NetworKIN	-0.287644		CSNK2A1	IRS1	S629	NetworKIN	-0.148885		CSNK2A1	IRS1	S629	NetworKIN	-0.21059		CSNK2A1	IRS1	S629	NetworKIN	-0.399285
		CSNK2A1	PDAP1	S63	NetworKIN	-0.0963849		CSNK2A1	PDAP1	S63	NetworKIN	-0.0201668		CSNK2A1	PDAP1	S63	NetworKIN	-0.143284		CSNK2A1	PDAP1	S63	NetworKIN	0.448551
		CSNK2A1	LEO1	S630	NetworKIN	0.257964		CSNK2A1	LEO1	S630	NetworKIN	-0.119554		CSNK2A1	LEO1	S630	NetworKIN	-0.165324		CSNK2A1	LEO1	S630	NetworKIN	0.0768652
		CSNK2A1	CTNNA3	S637	NetworKIN	-0.294772		CSNK2A1	CTNNA3	S637	NetworKIN	-0.441521		CSNK2A1	CTNNA3	S637	NetworKIN	-0.164215		CSNK2A1	CTNNA3	S637	NetworKIN	-0.21025
		CSNK2A1	GYS1	S657	NetworKIN	1.36282		CSNK2A1	GYS1	S657	NetworKIN	0.0703245		CSNK2A1	GYS1	S657	NetworKIN	0.844052		CSNK2A1	GYS1	S657	NetworKIN	0.695759
		CSNK2A1	VCL	S721	NetworKIN	-0.205689		CSNK2A1	VCL	S721	NetworKIN	0.102112		CSNK2A1	VCL	S721	NetworKIN	-0.223486		CSNK2A1	VCL	S721	NetworKIN	0.0325985
		CSNK2A1	EIF3B	S78	NetworKIN	0.319265		CSNK2A1	EIF3B	S78	NetworKIN	0.747985		CSNK2A1	EIF3B	S78	NetworKIN	0.00960905		CSNK2A1	EIF3B	S78	NetworKIN	0.342507
		CSNK2A1	PRKAR2A	S78	NetworKIN	0.0231678		CSNK2A1	PRKAR2A	S78	NetworKIN	0.0677798		CSNK2A1	PRKAR2A	S78	NetworKIN	0.00315091		CSNK2A1	PRKAR2A	S78	NetworKIN	0.181608
		CSNK2A1	PRKAR2A	S80	NetworKIN	0.310193		CSNK2A1	PRKAR2A	S80	NetworKIN	0.0535732		CSNK2A1	PRKAR2A	S80	NetworKIN	0.33025		CSNK2A1	PRKAR2A	S80	NetworKIN	0.503573
		CSNK2A1	USP39	S82	NetworKIN	-0.181548		CSNK2A1	USP39	S82	NetworKIN	-0.204647		CSNK2A1	USP39	S82	NetworKIN	-0.196014		CSNK2A1	USP39	S82	NetworKIN	-0.155777
		CSNK2A1	SORT1	S825	NetworKIN	-0.284358		CSNK2A1	SORT1	S825	NetworKIN	-0.284472		CSNK2A1	SORT1	S825	NetworKIN	-0.269547		CSNK2A1	SORT1	S825	NetworKIN	-0.378838
		CSNK2A1	ATRX	S875	NetworKIN	0.011382		CSNK2A1	ATRX	S875	NetworKIN	-0.125444		CSNK2A1	ATRX	S875	NetworKIN	-0.0497842		CSNK2A1	ATRX	S875	NetworKIN	0.0126993
		CSNK2A1	CTR9	S941	NetworKIN	0.108482		CSNK2A1	CTR9	S941	NetworKIN	-0.0681743		CSNK2A1	CTR9	S941	NetworKIN	0.0128636		CSNK2A1	CTR9	S941	NetworKIN	-0.146093
		CSNK2A1	EEF1B2	S95	NetworKIN	-0.415128		CSNK2A1	EEF1B2	S95	NetworKIN	-0.118186		CSNK2A1	EEF1B2	S95	NetworKIN	-0.534827		CSNK2A1	EEF1B2	S95	NetworKIN	-0.163701
		CSNK2A1	CTR9	S970	NetworKIN	-0.00483745		CSNK2A1	CTR9	S970	NetworKIN	-0.0575702		CSNK2A1	CTR9	S970	NetworKIN	0.0954489		CSNK2A1	CTR9	S970	NetworKIN	-0.0110697
		CSNK2A1	NUDC	T108	NetworKIN	-0.0753475		CSNK2A1	NUDC	T108	NetworKIN	0.0213686		CSNK2A1	NUDC	T108	NetworKIN	0.119797		CSNK2A1	NUDC	T108	NetworKIN	0.0856465
		CSNK2A1	EIF2S2	T111	NetworKIN	0.324183		CSNK2A1	EIF2S2	T111	NetworKIN	-0.252558		CSNK2A1	EIF2S2	T111	NetworKIN	-0.191808		CSNK2A1	EIF2S2	T111	NetworKIN	-0.199458
		CSNK2A1	MAPK14	T175	NetworKIN	-0.483801		CSNK2A1	MAPK14	T175	NetworKIN	-0.0678896		CSNK2A1	MAPK14	T175	NetworKIN	-0.906416		CSNK2A1	MAPK14	T175	NetworKIN	-0.58786
		CSNK2A1	MAPK14	T180	NetworKIN	-0.406813		CSNK2A1	MAPK14	T180	NetworKIN	0.90324		CSNK2A1	MAPK14	T180	NetworKIN	-0.607261		CSNK2A1	MAPK14	T180	NetworKIN	-0.165013
		CSNK2A1	RALY	T286	NetworKIN	-0.512741		CSNK2A1	RALY	T286	NetworKIN	-0.118949		CSNK2A1	RALY	T286	NetworKIN	-0.193301		CSNK2A1	RALY	T286	NetworKIN	0.123659
		CSNK2A1	CAMK2D	T337	NetworKIN	-0.211437		CSNK2A1	CAMK2D	T337	NetworKIN	-0.00500961		CSNK2A1	CAMK2D	T337	NetworKIN	-0.385476		CSNK2A1	CAMK2D	T337	NetworKIN	-0.190217
		CSNK2A1	CAMK2B	T400	NetworKIN	-0.371741		CSNK2A1	CAMK2B	T400	NetworKIN	-0.098834		CSNK2A1	CAMK2B	T400	NetworKIN	-0.41436		CSNK2A1	CAMK2B	T400	NetworKIN	-0.532754
		CSNK2A1	EIF4EBP1	T45	NetworKIN	-0.318009		CSNK2A1	EIF4EBP1	T45	NetworKIN	-0.061748		CSNK2A1	EIF4EBP1	T45	NetworKIN	-0.309611		CSNK2A1	EIF4EBP1	T45	NetworKIN	0.108782
		CSNK2A2	MAP1B	S1016	NetworKIN	-0.389653		CSNK2A2	MAP1B	S1016	NetworKIN	-0.25666		CSNK2A2	MAP1B	S1016	NetworKIN	-0.232579		CSNK2A2	MAP1B	S1016	NetworKIN	-0.0334273
		CSNK2A2	KIF1C	S1033	NetworKIN	0.0845322		CSNK2A2	KIF1C	S1033	NetworKIN	0.22731		CSNK2A2	KIF1C	S1033	NetworKIN	0.266963		CSNK2A2	KIF1C	S1033	NetworKIN	0.44963
		CSNK2A2	EEF1B2	S106	NetworKIN	0.0267522		CSNK2A2	EEF1B2	S106	NetworKIN	0.0658668		CSNK2A2	EEF1B2	S106	NetworKIN	0.182189		CSNK2A2	EEF1B2	S106	NetworKIN	0.314231
		CSNK2A2	PPP1R2	S121	NetworKIN	-0.260544		CSNK2A2	PPP1R2	S121	NetworKIN	0.0993257		CSNK2A2	PPP1R2	S121	NetworKIN	-0.198259		CSNK2A2	PPP1R2	S121	NetworKIN	-0.230015
		CSNK2A2	PPP1R2	S122	NetworKIN	0.173181		CSNK2A2	PPP1R2	S122	NetworKIN	0.375371		CSNK2A2	PPP1R2	S122	NetworKIN	-0.0581545		CSNK2A2	PPP1R2	S122	NetworKIN	0.245643
		CSNK2A2	NAP1L4	S125	NetworKIN	-0.0522864		CSNK2A2	NAP1L4	S125	NetworKIN	-0.02102		CSNK2A2	NAP1L4	S125	NetworKIN	0.190119		CSNK2A2	NAP1L4	S125	NetworKIN	0.142771
		CSNK2A2	NPM1	S125	NetworKIN	-0.0915148		CSNK2A2	NPM1	S125	NetworKIN	-0.107424		CSNK2A2	NPM1	S125	NetworKIN	-0.331386		CSNK2A2	NPM1	S125	NetworKIN	-0.17342
		CSNK2A2	MAP1B	S1265	NetworKIN	-0.0980546		CSNK2A2	MAP1B	S1265	NetworKIN	0.145732		CSNK2A2	MAP1B	S1265	NetworKIN	-0.0287158		CSNK2A2	MAP1B	S1265	NetworKIN	0.248489
		CSNK2A2	EIF3J	S127	NetworKIN	-0.121745		CSNK2A2	EIF3J	S127	NetworKIN	0.0405703		CSNK2A2	EIF3J	S127	NetworKIN	0.0822766		CSNK2A2	EIF3J	S127	NetworKIN	0.260991
		CSNK2A2	MAP1B	S1427	NetworKIN	-0.0730376		CSNK2A2	MAP1B	S1427	NetworKIN	-0.484009		CSNK2A2	MAP1B	S1427	NetworKIN	0.126065		CSNK2A2	MAP1B	S1427	NetworKIN	0.145225
		CSNK2A2	MAP1B	S1438	NetworKIN	-0.497654		CSNK2A2	MAP1B	S1438	NetworKIN	0.0285366		CSNK2A2	MAP1B	S1438	NetworKIN	-0.291281		CSNK2A2	MAP1B	S1438	NetworKIN	0.0448723
		CSNK2A2	MAP1B	S1501	NetworKIN	0.0861649		CSNK2A2	MAP1B	S1501	NetworKIN	0.040069		CSNK2A2	MAP1B	S1501	NetworKIN	0.0218512		CSNK2A2	MAP1B	S1501	NetworKIN	0.433025
		CSNK2A2	EIF3C	S166	NetworKIN	-0.104844		CSNK2A2	EIF3C	S166	NetworKIN	-0.218956		CSNK2A2	EIF3C	S166	NetworKIN	-0.212209		CSNK2A2	EIF3C	S166	NetworKIN	-0.123841
		CSNK2A2	MAP1B	S1772	NetworKIN	-0.0100251		CSNK2A2	MAP1B	S1772	NetworKIN	0.202755		CSNK2A2	MAP1B	S1772	NetworKIN	0.19807		CSNK2A2	MAP1B	S1772	NetworKIN	0.203484
		CSNK2A2	PPP1R2	S20	NetworKIN	-0.804556		CSNK2A2	PPP1R2	S20	NetworKIN	-0.364553		CSNK2A2	PPP1R2	S20	NetworKIN	-0.314021		CSNK2A2	PPP1R2	S20	NetworKIN	-0.802423
		CSNK2A2	HNRNPC	S233	NetworKIN	-0.338632		CSNK2A2	HNRNPC	S233	NetworKIN	0.160462		CSNK2A2	HNRNPC	S233	NetworKIN	-0.0577506		CSNK2A2	HNRNPC	S233	NetworKIN	0.0139997
		CSNK2A2	M6PR	S267	NetworKIN	-0.615035		CSNK2A2	M6PR	S267	NetworKIN	-0.0547896		CSNK2A2	M6PR	S267	NetworKIN	0.0358127		CSNK2A2	M6PR	S267	NetworKIN	-0.127117
		CSNK2A2	AQP4	S276	NetworKIN	1.15341		CSNK2A2	AQP4	S276	NetworKIN	0.545275		CSNK2A2	AQP4	S276	NetworKIN	0.577033		CSNK2A2	AQP4	S276	NetworKIN	0.744179
		CSNK2A2	AQP4	S285	NetworKIN	0.597668		CSNK2A2	AQP4	S285	NetworKIN	0.0330761		CSNK2A2	AQP4	S285	NetworKIN	0.13473		CSNK2A2	AQP4	S285	NetworKIN	0.359253
		CSNK2A2	HNRNPC	S299	NetworKIN	-0.804536		CSNK2A2	HNRNPC	S299	NetworKIN	0.194843		CSNK2A2	HNRNPC	S299	NetworKIN	-0.614343		CSNK2A2	HNRNPC	S299	NetworKIN	0.137164
		CSNK2A2	HNRNPC	S306	NetworKIN	0.690994		CSNK2A2	HNRNPC	S306	NetworKIN	0.0495574		CSNK2A2	HNRNPC	S306	NetworKIN	0.738648		CSNK2A2	HNRNPC	S306	NetworKIN	0.266856
		CSNK2A2	HSP90B1	S306	NetworKIN	-0.0171208		CSNK2A2	HSP90B1	S306	NetworKIN	0.158277		CSNK2A2	HSP90B1	S306	NetworKIN	-0.0584233		CSNK2A2	HSP90B1	S306	NetworKIN	0.096271
		CSNK2A2	CAV1	S37	NetworKIN	0.0594972		CSNK2A2	CAV1	S37	NetworKIN	-0.0155662		CSNK2A2	CAV1	S37	NetworKIN	-0.0691817		CSNK2A2	CAV1	S37	NetworKIN	0.138155
		CSNK2A2	EIF3C	S39	NetworKIN	0.0197301		CSNK2A2	EIF3C	S39	NetworKIN	0.0324876		CSNK2A2	EIF3C	S39	NetworKIN	0.0130465		CSNK2A2	EIF3C	S39	NetworKIN	0.0552554
		CSNK2A2	HDAC1	S393	NetworKIN	0.654851		CSNK2A2	HDAC1	S393	NetworKIN	0.0987941		CSNK2A2	HDAC1	S393	NetworKIN	-0.0572387		CSNK2A2	HDAC1	S393	NetworKIN	0.450716
		CSNK2A2	MAP1B	S541	NetworKIN	-0.487644		CSNK2A2	MAP1B	S541	NetworKIN	-0.595475		CSNK2A2	MAP1B	S541	NetworKIN	-0.122771		CSNK2A2	MAP1B	S541	NetworKIN	-0.13703
		CSNK2A2	CTDP1	S839	NetworKIN	-0.0925096		CSNK2A2	CTDP1	S839	NetworKIN	-0.100245		CSNK2A2	CTDP1	S839	NetworKIN	-0.179598		CSNK2A2	CTDP1	S839	NetworKIN	0.0258469
		CSNK2A2	EEF1B2	S95	NetworKIN	-0.415128		CSNK2A2	EEF1B2	S95	NetworKIN	-0.118186		CSNK2A2	EEF1B2	S95	NetworKIN	-0.534827		CSNK2A2	EEF1B2	S95	NetworKIN	-0.163701
		CSNK2A2	EIF2S2	T111	NetworKIN	0.324183		CSNK2A2	EIF2S2	T111	NetworKIN	-0.252558		CSNK2A2	EIF2S2	T111	NetworKIN	-0.191808		CSNK2A2	EIF2S2	T111	NetworKIN	-0.199458
		CSNK2A2	MAPK14	T175	NetworKIN	-0.483801		CSNK2A2	MAPK14	T175	NetworKIN	-0.0678896		CSNK2A2	MAPK14	T175	NetworKIN	-0.906416		CSNK2A2	MAPK14	T175	NetworKIN	-0.58786
		CSNK2A2	MAP1B	T1788	NetworKIN	-0.602114		CSNK2A2	MAP1B	T1788	NetworKIN	-0.211821		CSNK2A2	MAP1B	T1788	NetworKIN	-0.255647		CSNK2A2	MAP1B	T1788	NetworKIN	-0.512466
		CSNK2A2	MAPK14	T180	NetworKIN	-0.406813		CSNK2A2	MAPK14	T180	NetworKIN	0.90324		CSNK2A2	MAPK14	T180	NetworKIN	-0.607261		CSNK2A2	MAPK14	T180	NetworKIN	-0.165013
		CSNK2A2	PYGO2	T302	NetworKIN	-0.354521		CSNK2A2	PYGO2	T302	NetworKIN	-0.28755		CSNK2A2	PYGO2	T302	NetworKIN	-0.362753		CSNK2A2	PYGO2	T302	NetworKIN	-0.18653
		CSNK2A2	EIF4EBP1	T41	NetworKIN	-1.06096		CSNK2A2	EIF4EBP1	T41	NetworKIN	-0.627792		CSNK2A2	EIF4EBP1	T41	NetworKIN	-0.108944		CSNK2A2	EIF4EBP1	T41	NetworKIN	-0.250171
		CSNK2A2	EIF4EBP1	T45	NetworKIN	-0.318009		CSNK2A2	EIF4EBP1	T45	NetworKIN	-0.061748		CSNK2A2	EIF4EBP1	T45	NetworKIN	-0.309611		CSNK2A2	EIF4EBP1	T45	NetworKIN	0.108782
		CSNK2A2	XRCC1	T453	NetworKIN	0.133456		CSNK2A2	XRCC1	T453	NetworKIN	0.467319		CSNK2A2	XRCC1	T453	NetworKIN	0.223562		CSNK2A2	XRCC1	T453	NetworKIN	0.120296
		CSNK2A2	EIF4EBP1	T77	NetworKIN	0.656836		CSNK2A2	EIF4EBP1	T77	NetworKIN	0.51858		CSNK2A2	EIF4EBP1	T77	NetworKIN	0.573166		CSNK2A2	EIF4EBP1	T77	NetworKIN	0.168948
		CSNK2A2	PPP1R2	T92	NetworKIN	1.11617		CSNK2A2	PPP1R2	T92	NetworKIN	0.591251		CSNK2A2	PPP1R2	T92	NetworKIN	1.76944		CSNK2A2	PPP1R2	T92	NetworKIN	1.11039
		DAPK1	MAP1B	T1067	NetworKIN	-0.02448		DAPK1	MAP1B	T1067	NetworKIN	0.0925014		DAPK1	MAP1B	T1067	NetworKIN	-0.400795		DAPK1	MAP1B	T1067	NetworKIN	0.107702
		DAPK1	MAP1B	T1788	NetworKIN	-0.602114		DAPK1	MAP1B	T1788	NetworKIN	-0.211821		DAPK1	MAP1B	T1788	NetworKIN	-0.255647		DAPK1	MAP1B	T1788	NetworKIN	-0.512466
		DAPK1	MAPK1	T181	NetworKIN	1.14009		DAPK1	MAPK1	T181	NetworKIN	0.821711		DAPK1	MAPK1	T181	NetworKIN	0.306912		DAPK1	MAPK1	T181	NetworKIN	0.134891
		DAPK1	MAPK1	T185	NetworKIN	0.843342		DAPK1	MAPK1	T185	NetworKIN	0.433775		DAPK1	MAPK1	T185	NetworKIN	0.120569		DAPK1	MAPK1	T185	NetworKIN	0.0443969
		DAPK1	MAPK3	T198	NetworKIN	1.25513		DAPK1	MAPK3	T198	NetworKIN	0.41761		DAPK1	MAPK3	T198	NetworKIN	0.393371		DAPK1	MAPK3	T198	NetworKIN	0.14984
		DAPK1	MAPK3	T202	NetworKIN	1.21705		DAPK1	MAPK3	T202	NetworKIN	0.983122		DAPK1	MAPK3	T202	NetworKIN	0.414181		DAPK1	MAPK3	T202	NetworKIN	0.12007
		DAPK2	MAPK1	T181	NetworKIN	1.14009		DAPK2	MAPK1	T181	NetworKIN	0.821711		DAPK2	MAPK1	T181	NetworKIN	0.306912		DAPK2	MAPK1	T181	NetworKIN	0.134891
		DAPK2	MAPK1	T185	NetworKIN	0.843342		DAPK2	MAPK1	T185	NetworKIN	0.433775		DAPK2	MAPK1	T185	NetworKIN	0.120569		DAPK2	MAPK1	T185	NetworKIN	0.0443969
		DAPK2	MAPK3	T198	NetworKIN	1.25513		DAPK2	MAPK3	T198	NetworKIN	0.41761		DAPK2	MAPK3	T198	NetworKIN	0.393371		DAPK2	MAPK3	T198	NetworKIN	0.14984
		DAPK2	MAPK3	T202	NetworKIN	1.21705		DAPK2	MAPK3	T202	NetworKIN	0.983122		DAPK2	MAPK3	T202	NetworKIN	0.414181		DAPK2	MAPK3	T202	NetworKIN	0.12007
		DAPK3	MAPK1	T181	NetworKIN	1.14009		DAPK3	MAPK1	T181	NetworKIN	0.821711		DAPK3	MAPK1	T181	NetworKIN	0.306912		DAPK3	MAPK1	T181	NetworKIN	0.134891
		DAPK3	MAPK1	T185	NetworKIN	0.843342		DAPK3	MAPK1	T185	NetworKIN	0.433775		DAPK3	MAPK1	T185	NetworKIN	0.120569		DAPK3	MAPK1	T185	NetworKIN	0.0443969
		DAPK3	MAPK3	T198	NetworKIN	1.25513		DAPK3	MAPK3	T198	NetworKIN	0.41761		DAPK3	MAPK3	T198	NetworKIN	0.393371		DAPK3	MAPK3	T198	NetworKIN	0.14984
		DAPK3	MAPK3	T202	NetworKIN	1.21705		DAPK3	MAPK3	T202	NetworKIN	0.983122		DAPK3	MAPK3	T202	NetworKIN	0.414181		DAPK3	MAPK3	T202	NetworKIN	0.12007
		DAPK3	SERBP1	T232	NetworKIN	1.14626		DAPK3	SERBP1	T232	NetworKIN	0.755948		DAPK3	SERBP1	T232	NetworKIN	0.508923		DAPK3	SERBP1	T232	NetworKIN	0.501427
		DAPK3	STAT3	T714	NetworKIN	0.271959		DAPK3	STAT3	T714	NetworKIN	0.311242		DAPK3	STAT3	T714	NetworKIN	0.00649104		DAPK3	STAT3	T714	NetworKIN	0.329026
		DMPK	CKM	S128	NetworKIN	-0.0164572		DMPK	CKM	S128	NetworKIN	-0.0551921		DMPK	CKM	S128	NetworKIN	-0.0785798		DMPK	CKM	S128	NetworKIN	0.0373001
		DMPK	NOS1	S1417	NetworKIN	-0.600529		DMPK	NOS1	S1417	NetworKIN	-0.158303		DMPK	NOS1	S1417	NetworKIN	-0.206982		DMPK	NOS1	S1417	NetworKIN	-0.295788
		DMPK	HSPB1	S15	NetworKIN	0.907348		DMPK	HSPB1	S15	NetworKIN	1.06209		DMPK	HSPB1	S15	NetworKIN	-0.24272		DMPK	HSPB1	S15	NetworKIN	1.33422
		DMPK	CRYAB	S153	NetworKIN	0.325628		DMPK	CRYAB	S153	NetworKIN	0.322239		DMPK	CRYAB	S153	NetworKIN	-0.065786		DMPK	CRYAB	S153	NetworKIN	0.292384
		DMPK	ACTN4	S159	NetworKIN	0.0269188		DMPK	ACTN4	S159	NetworKIN	0.0182804		DMPK	ACTN4	S159	NetworKIN	-0.0361802		DMPK	ACTN4	S159	NetworKIN	-0.0945034
		DMPK	FTH1	S179	NetworKIN	-0.210752		DMPK	FTH1	S179	NetworKIN	0.0505997		DMPK	FTH1	S179	NetworKIN	-0.119934		DMPK	FTH1	S179	NetworKIN	-0.236374
		DMPK	FTH1	S183	NetworKIN	0.0541126		DMPK	FTH1	S183	NetworKIN	0.0835491		DMPK	FTH1	S183	NetworKIN	-0.078568		DMPK	FTH1	S183	NetworKIN	0.0384777
		DMPK	CRYAB	S19	NetworKIN	0.536757		DMPK	CRYAB	S19	NetworKIN	0.296643		DMPK	CRYAB	S19	NetworKIN	0.418295		DMPK	CRYAB	S19	NetworKIN	0.811809
		DMPK	HSPB1	S199	NetworKIN	0.0759985		DMPK	HSPB1	S199	NetworKIN	0.83824		DMPK	HSPB1	S199	NetworKIN	-0.625257		DMPK	HSPB1	S199	NetworKIN	1.11307
		DMPK	CRYAB	S21	NetworKIN	0.0567299		DMPK	CRYAB	S21	NetworKIN	0.119796		DMPK	CRYAB	S21	NetworKIN	-0.218982		DMPK	CRYAB	S21	NetworKIN	-0.00641106
		DMPK	QDPR	S223	NetworKIN	-0.0869818		DMPK	QDPR	S223	NetworKIN	-0.0242604		DMPK	QDPR	S223	NetworKIN	0.0290736		DMPK	QDPR	S223	NetworKIN	0.0404027
		DMPK	RAF1	S259	NetworKIN	0.0704419		DMPK	RAF1	S259	NetworKIN	0.221194		DMPK	RAF1	S259	NetworKIN	-0.06939		DMPK	RAF1	S259	NetworKIN	0.139441
		DMPK	CKM	S285	NetworKIN	0.0100224		DMPK	CKM	S285	NetworKIN	0.0359059		DMPK	CKM	S285	NetworKIN	-0.0657579		DMPK	CKM	S285	NetworKIN	0.0821291
		DMPK	RAF1	S29	NetworKIN	0.285384		DMPK	RAF1	S29	NetworKIN	0.347605		DMPK	RAF1	S29	NetworKIN	-0.179172		DMPK	RAF1	S29	NetworKIN	0.450777
		DMPK	RAF1	S43	NetworKIN	0.116785		DMPK	RAF1	S43	NetworKIN	-0.0508473		DMPK	RAF1	S43	NetworKIN	0.0418492		DMPK	RAF1	S43	NetworKIN	0.137959
		DMPK	ACTN4	S461	NetworKIN	-0.197334		DMPK	ACTN4	S461	NetworKIN	-0.0405126		DMPK	ACTN4	S461	NetworKIN	-0.0669813		DMPK	ACTN4	S461	NetworKIN	0.066449
		DMPK	DMWD	S493	NetworKIN	-0.0671982		DMPK	DMWD	S493	NetworKIN	0.0957249		DMPK	DMWD	S493	NetworKIN	-0.188685		DMPK	DMWD	S493	NetworKIN	-0.0507474
		DMPK	CRYAB	S59	NetworKIN	0.73125		DMPK	CRYAB	S59	NetworKIN	1.09002		DMPK	CRYAB	S59	NetworKIN	-0.604383		DMPK	CRYAB	S59	NetworKIN	1.35463
		DMPK	HSPB1	S65	NetworKIN	-0.0544483		DMPK	HSPB1	S65	NetworKIN	0.609351		DMPK	HSPB1	S65	NetworKIN	-0.264683		DMPK	HSPB1	S65	NetworKIN	0.522503
		DMPK	CRYAB	S76	NetworKIN	0.327871		DMPK	CRYAB	S76	NetworKIN	0.171532		DMPK	CRYAB	S76	NetworKIN	0.200635		DMPK	CRYAB	S76	NetworKIN	0.135747
		DMPK	HSPB1	S82	NetworKIN	0.189405		DMPK	HSPB1	S82	NetworKIN	0.769092		DMPK	HSPB1	S82	NetworKIN	-0.292281		DMPK	HSPB1	S82	NetworKIN	0.756969
		DMPK	HSPB1	S83	NetworKIN	0.543042		DMPK	HSPB1	S83	NetworKIN	1.07493		DMPK	HSPB1	S83	NetworKIN	-0.337007		DMPK	HSPB1	S83	NetworKIN	1.28287
		DMPK	NOS1	S852	NetworKIN	0.986083		DMPK	NOS1	S852	NetworKIN	0.638822		DMPK	NOS1	S852	NetworKIN	-0.277288		DMPK	NOS1	S852	NetworKIN	-0.042151
		DMPK	HSPB1	S86	NetworKIN	0.413524		DMPK	HSPB1	S86	NetworKIN	0.283909		DMPK	HSPB1	S86	NetworKIN	-0.0210476		DMPK	HSPB1	S86	NetworKIN	0.72194
		DMPK	HSPB1	S98	NetworKIN	0.163396		DMPK	HSPB1	S98	NetworKIN	0.156115		DMPK	HSPB1	S98	NetworKIN	-0.196231		DMPK	HSPB1	S98	NetworKIN	0.0229462
		DMPK	FTH1	T175	NetworKIN	-0.0325435		DMPK	FTH1	T175	NetworKIN	0.0693499		DMPK	FTH1	T175	NetworKIN	-0.242017		DMPK	FTH1	T175	NetworKIN	0.0846051
		DMPK	CKM	T282	NetworKIN	-0.264708		DMPK	CKM	T282	NetworKIN	-0.108729		DMPK	CKM	T282	NetworKIN	-0.214896		DMPK	CKM	T282	NetworKIN	-0.231405
		DMPK	CKM	T289	NetworKIN	0.00430106		DMPK	CKM	T289	NetworKIN	0.2287		DMPK	CKM	T289	NetworKIN	0.201874		DMPK	CKM	T289	NetworKIN	0.0308368
		EGFR	NCK2	Y110	NetworKIN	0.255847		EGFR	NCK2	Y110	NetworKIN	0.353858		EGFR	NCK2	Y110	NetworKIN	0.221381		EGFR	NCK2	Y110	NetworKIN	-0.0265361
		EGFR	MAPK1	Y187	NetworKIN	1.18778		EGFR	MAPK1	Y187	NetworKIN	0.955486		EGFR	MAPK1	Y187	NetworKIN	0.235134		EGFR	MAPK1	Y187	NetworKIN	-0.0531964
		EGFR	MAPK3	Y204	NetworKIN	1.23259		EGFR	MAPK3	Y204	NetworKIN	1.03347		EGFR	MAPK3	Y204	NetworKIN	0.436125		EGFR	MAPK3	Y204	NetworKIN	0.249384
		EGFR	WASL	Y256	NetworKIN	-1.60156		EGFR	WASL	Y256	NetworKIN	-1.42531		EGFR	WASL	Y256	NetworKIN	-1.0503		EGFR	WASL	Y256	NetworKIN	-1.52653
		EGFR	EIF3A	Y382	NetworKIN	-0.252486		EGFR	EIF3A	Y382	NetworKIN	-0.125322		EGFR	EIF3A	Y382	NetworKIN	-0.317823		EGFR	EIF3A	Y382	NetworKIN	-0.182532
		EGFR	STAT5B	Y699	NetworKIN	3.09371		EGFR	STAT5B	Y699	NetworKIN	2.77338		EGFR	STAT5B	Y699	NetworKIN	0.404187		EGFR	STAT5B	Y699	NetworKIN	1.02216
		EIF2AK2	MAP3K5	S1033	NetworKIN	0.114814		EIF2AK2	MAP3K5	S1033	NetworKIN	0.354206		EIF2AK2	MAP3K5	S1033	NetworKIN	0.0969876		EIF2AK2	MAP3K5	S1033	NetworKIN	0.0732687
		EIF2AK2	NPM1	S125	NetworKIN	-0.0915148		EIF2AK2	NPM1	S125	NetworKIN	-0.107424		EIF2AK2	NPM1	S125	NetworKIN	-0.331386		EIF2AK2	NPM1	S125	NetworKIN	-0.17342
		EIF2AK2	MTOR	S1261	NetworKIN	1.57622		EIF2AK2	MTOR	S1261	NetworKIN	0.481325		EIF2AK2	MTOR	S1261	NetworKIN	0.0617946		EIF2AK2	MTOR	S1261	NetworKIN	0.356927
		EIF2AK2	TARBP2	S152	NetworKIN	0.15436		EIF2AK2	TARBP2	S152	NetworKIN	0.743819		EIF2AK2	TARBP2	S152	NetworKIN	-0.306844		EIF2AK2	TARBP2	S152	NetworKIN	0.411055
		EIF2AK2	MAVS	S165	NetworKIN	0.216948		EIF2AK2	MAVS	S165	NetworKIN	-0.0324596		EIF2AK2	MAVS	S165	NetworKIN	-0.279469		EIF2AK2	MAVS	S165	NetworKIN	0.140594
		EIF2AK2	PRKRA	S167	NetworKIN	-0.0348004		EIF2AK2	PRKRA	S167	NetworKIN	0.336439		EIF2AK2	PRKRA	S167	NetworKIN	-0.174878		EIF2AK2	PRKRA	S167	NetworKIN	-0.00179479
		EIF2AK2	IRF3	S173	NetworKIN	-0.448969		EIF2AK2	IRF3	S173	NetworKIN	-0.165287		EIF2AK2	IRF3	S173	NetworKIN	-0.113078		EIF2AK2	IRF3	S173	NetworKIN	-0.367672
		EIF2AK2	PRKRA	S18	NetworKIN	-0.0169171		EIF2AK2	PRKRA	S18	NetworKIN	0.136942		EIF2AK2	PRKRA	S18	NetworKIN	-0.549922		EIF2AK2	PRKRA	S18	NetworKIN	-0.193262
		EIF2AK2	MAVS	S222	NetworKIN	0.513141		EIF2AK2	MAVS	S222	NetworKIN	0.803329		EIF2AK2	MAVS	S222	NetworKIN	-0.556973		EIF2AK2	MAVS	S222	NetworKIN	0.832508
		EIF2AK2	MAVS	S253	NetworKIN	-0.519855		EIF2AK2	MAVS	S253	NetworKIN	-0.236714		EIF2AK2	MAVS	S253	NetworKIN	-0.294434		EIF2AK2	MAVS	S253	NetworKIN	-0.351626
		EIF2AK2	DNAJB6	S277	NetworKIN	-0.585087		EIF2AK2	DNAJB6	S277	NetworKIN	-0.31685		EIF2AK2	DNAJB6	S277	NetworKIN	-0.182675		EIF2AK2	DNAJB6	S277	NetworKIN	-0.190331
		EIF2AK2	HSP90B1	S306	NetworKIN	-0.0171208		EIF2AK2	HSP90B1	S306	NetworKIN	0.158277		EIF2AK2	HSP90B1	S306	NetworKIN	-0.0584233		EIF2AK2	HSP90B1	S306	NetworKIN	0.096271
		EIF2AK2	MAP3K7	S389	NetworKIN	-0.12889		EIF2AK2	MAP3K7	S389	NetworKIN	-0.157954		EIF2AK2	MAP3K7	S389	NetworKIN	-0.133467		EIF2AK2	MAP3K7	S389	NetworKIN	-0.418626
		EIF2AK2	MAP3K7	S439	NetworKIN	-0.167399		EIF2AK2	MAP3K7	S439	NetworKIN	-0.00522858		EIF2AK2	MAP3K7	S439	NetworKIN	-0.413548		EIF2AK2	MAP3K7	S439	NetworKIN	-0.174915
		EIF2AK2	METAP2	S45	NetworKIN	-0.664358		EIF2AK2	METAP2	S45	NetworKIN	0.611618		EIF2AK2	METAP2	S45	NetworKIN	-0.339826		EIF2AK2	METAP2	S45	NetworKIN	-0.298635
		EIF2AK2	PPP2R5A	S49	NetworKIN	-0.156536		EIF2AK2	PPP2R5A	S49	NetworKIN	0.315951		EIF2AK2	PPP2R5A	S49	NetworKIN	-0.0387522		EIF2AK2	PPP2R5A	S49	NetworKIN	0.093687
		EIF2AK2	EIF4EBP1	S65	NetworKIN	-0.315819		EIF2AK2	EIF4EBP1	S65	NetworKIN	-0.076274		EIF2AK2	EIF4EBP1	S65	NetworKIN	-0.326703		EIF2AK2	EIF4EBP1	S65	NetworKIN	-0.125688
		EIF2AK2	IKBKB	S672	NetworKIN	-0.548396		EIF2AK2	IKBKB	S672	NetworKIN	-0.475528		EIF2AK2	IKBKB	S672	NetworKIN	-0.570616		EIF2AK2	IKBKB	S672	NetworKIN	-0.225144
		EIF2AK2	STAT1	S727	NetworKIN	0.0490821		EIF2AK2	STAT1	S727	NetworKIN	0.0083493		EIF2AK2	STAT1	S727	NetworKIN	-0.0576933		EIF2AK2	STAT1	S727	NetworKIN	-0.137704
		EIF2AK2	STAT3	S727	NetworKIN	0.339506		EIF2AK2	STAT3	S727	NetworKIN	0.186147		EIF2AK2	STAT3	S727	NetworKIN	-0.0331908		EIF2AK2	STAT3	S727	NetworKIN	0.114411
		EIF2AK2	HSPA4	S76	NetworKIN	-0.0543045		EIF2AK2	HSPA4	S76	NetworKIN	0.0211853		EIF2AK2	HSPA4	S76	NetworKIN	-0.0258746		EIF2AK2	HSPA4	S76	NetworKIN	-0.129847
		EIF2AK2	NCK1	S85	NetworKIN	-0.180263		EIF2AK2	NCK1	S85	NetworKIN	-0.0940062		EIF2AK2	NCK1	S85	NetworKIN	-0.296493		EIF2AK2	NCK1	S85	NetworKIN	-0.089135
		EIF2AK2	EIF2S2	T111	NetworKIN	0.324183		EIF2AK2	EIF2S2	T111	NetworKIN	-0.252558		EIF2AK2	EIF2S2	T111	NetworKIN	-0.191808		EIF2AK2	EIF2S2	T111	NetworKIN	-0.199458
		EIF2AK2	EIF4EBP1	T37	NetworKIN	0.0573973		EIF2AK2	EIF4EBP1	T37	NetworKIN	0.147867		EIF2AK2	EIF4EBP1	T37	NetworKIN	0.123695		EIF2AK2	EIF4EBP1	T37	NetworKIN	0.338825
		EIF2AK2	EIF4EBP1	T41	NetworKIN	-1.06096		EIF2AK2	EIF4EBP1	T41	NetworKIN	-0.627792		EIF2AK2	EIF4EBP1	T41	NetworKIN	-0.108944		EIF2AK2	EIF4EBP1	T41	NetworKIN	-0.250171
		EIF2AK2	EIF4EBP1	T45	NetworKIN	-0.318009		EIF2AK2	EIF4EBP1	T45	NetworKIN	-0.061748		EIF2AK2	EIF4EBP1	T45	NetworKIN	-0.309611		EIF2AK2	EIF4EBP1	T45	NetworKIN	0.108782
		EIF2AK2	EIF4EBP1	T46	NetworKIN	-0.500107		EIF2AK2	EIF4EBP1	T46	NetworKIN	-0.257663		EIF2AK2	EIF4EBP1	T46	NetworKIN	-0.49331		EIF2AK2	EIF4EBP1	T46	NetworKIN	-0.250636
		EIF2AK2	EIF4EBP1	T68	NetworKIN	0.407571		EIF2AK2	EIF4EBP1	T68	NetworKIN	0.636081		EIF2AK2	EIF4EBP1	T68	NetworKIN	0.367748		EIF2AK2	EIF4EBP1	T68	NetworKIN	0.200482
		EIF2AK2	STAT3	T714	NetworKIN	0.271959		EIF2AK2	STAT3	T714	NetworKIN	0.311242		EIF2AK2	STAT3	T714	NetworKIN	0.00649104		EIF2AK2	STAT3	T714	NetworKIN	0.329026
		EIF2AK2	EIF4EBP1	T77	NetworKIN	0.656836		EIF2AK2	EIF4EBP1	T77	NetworKIN	0.51858		EIF2AK2	EIF4EBP1	T77	NetworKIN	0.573166		EIF2AK2	EIF4EBP1	T77	NetworKIN	0.168948
		EPHA1	NCK2	Y110	NetworKIN	0.255847		EPHA1	NCK2	Y110	NetworKIN	0.353858		EPHA1	NCK2	Y110	NetworKIN	0.221381		EPHA1	NCK2	Y110	NetworKIN	-0.0265361
		EPHA1	NGEF	Y179	NetworKIN	-0.34715		EPHA1	NGEF	Y179	NetworKIN	0.35893		EPHA1	NGEF	Y179	NetworKIN	-0.31736		EPHA1	NGEF	Y179	NetworKIN	0.0837749
		EPHA2	NGEF	Y179	NetworKIN	-0.34715		EPHA2	NGEF	Y179	NetworKIN	0.35893		EPHA2	NGEF	Y179	NetworKIN	-0.31736		EPHA2	NGEF	Y179	NetworKIN	0.0837749
		EPHA3	NGEF	Y179	NetworKIN	-0.34715		EPHA3	NGEF	Y179	NetworKIN	0.35893		EPHA3	NGEF	Y179	NetworKIN	-0.31736		EPHA3	NGEF	Y179	NetworKIN	0.0837749
		EPHA4	NCK2	Y110	NetworKIN	0.255847		EPHA4	NCK2	Y110	NetworKIN	0.353858		EPHA4	NCK2	Y110	NetworKIN	0.221381		EPHA4	NCK2	Y110	NetworKIN	-0.0265361
		EPHA4	NGEF	Y179	NetworKIN	-0.34715		EPHA4	NGEF	Y179	NetworKIN	0.35893		EPHA4	NGEF	Y179	NetworKIN	-0.31736		EPHA4	NGEF	Y179	NetworKIN	0.0837749
		EPHA5	NGEF	Y179	NetworKIN	-0.34715		EPHA5	NGEF	Y179	NetworKIN	0.35893		EPHA5	NGEF	Y179	NetworKIN	-0.31736		EPHA5	NGEF	Y179	NetworKIN	0.0837749
		EPHA6	NGEF	Y179	NetworKIN	-0.34715		EPHA6	NGEF	Y179	NetworKIN	0.35893		EPHA6	NGEF	Y179	NetworKIN	-0.31736		EPHA6	NGEF	Y179	NetworKIN	0.0837749
		EPHA7	NGEF	Y179	NetworKIN	-0.34715		EPHA7	NGEF	Y179	NetworKIN	0.35893		EPHA7	NGEF	Y179	NetworKIN	-0.31736		EPHA7	NGEF	Y179	NetworKIN	0.0837749
		EPHA8	NGEF	Y179	NetworKIN	-0.34715		EPHA8	NGEF	Y179	NetworKIN	0.35893		EPHA8	NGEF	Y179	NetworKIN	-0.31736		EPHA8	NGEF	Y179	NetworKIN	0.0837749
		EPHB1	NCK2	Y110	NetworKIN	0.255847		EPHB1	NCK2	Y110	NetworKIN	0.353858		EPHB1	NCK2	Y110	NetworKIN	0.221381		EPHB1	NCK2	Y110	NetworKIN	-0.0265361
		EPHB1	PXN	Y88	NetworKIN	-0.13133		EPHB1	PXN	Y88	NetworKIN	-0.0714683		EPHB1	PXN	Y88	NetworKIN	-0.108439		EPHB1	PXN	Y88	NetworKIN	0.197437
		EPHB2	NCK2	Y110	NetworKIN	0.255847		EPHB2	NCK2	Y110	NetworKIN	0.353858		EPHB2	NCK2	Y110	NetworKIN	0.221381		EPHB2	NCK2	Y110	NetworKIN	-0.0265361
		EPHB2	NGEF	Y179	NetworKIN	-0.34715		EPHB2	NGEF	Y179	NetworKIN	0.35893		EPHB2	NGEF	Y179	NetworKIN	-0.31736		EPHB2	NGEF	Y179	NetworKIN	0.0837749
		EPHB2	WASL	Y256	NetworKIN	-1.60156		EPHB2	WASL	Y256	NetworKIN	-1.42531		EPHB2	WASL	Y256	NetworKIN	-1.0503		EPHB2	WASL	Y256	NetworKIN	-1.52653
		EPHB2	ABL2	Y310	NetworKIN	0.147862		EPHB2	ABL2	Y310	NetworKIN	0.102967		EPHB2	ABL2	Y310	NetworKIN	1.02735		EPHB2	ABL2	Y310	NetworKIN	0.592422
		EPHB3	CRKL	Y207	NetworKIN	-0.118188		EPHB3	CRKL	Y207	NetworKIN	0.124918		EPHB3	CRKL	Y207	NetworKIN	-0.285857		EPHB3	CRKL	Y207	NetworKIN	0.200331
		EPHB6	NCK2	Y110	NetworKIN	0.255847		EPHB6	NCK2	Y110	NetworKIN	0.353858		EPHB6	NCK2	Y110	NetworKIN	0.221381		EPHB6	NCK2	Y110	NetworKIN	-0.0265361
		EPHB6	CRKL	Y207	NetworKIN	-0.118188		EPHB6	CRKL	Y207	NetworKIN	0.124918		EPHB6	CRKL	Y207	NetworKIN	-0.285857		EPHB6	CRKL	Y207	NetworKIN	0.200331
		ERBB2	HSPB1	Y133	NetworKIN	-0.152882		ERBB2	HSPB1	Y133	NetworKIN	0.0261324		ERBB2	HSPB1	Y133	NetworKIN	-0.290601		ERBB2	HSPB1	Y133	NetworKIN	-0.0777521
		ERBB2	MAPK1	Y187	NetworKIN	1.18778		ERBB2	MAPK1	Y187	NetworKIN	0.955486		ERBB2	MAPK1	Y187	NetworKIN	0.235134		ERBB2	MAPK1	Y187	NetworKIN	-0.0531964
		ERBB2	PGK1	Y196	NetworKIN	-0.0562389		ERBB2	PGK1	Y196	NetworKIN	-0.0316638		ERBB2	PGK1	Y196	NetworKIN	-0.186571		ERBB2	PGK1	Y196	NetworKIN	-0.20535
		ERBB2	MAPK3	Y204	NetworKIN	1.23259		ERBB2	MAPK3	Y204	NetworKIN	1.03347		ERBB2	MAPK3	Y204	NetworKIN	0.436125		ERBB2	MAPK3	Y204	NetworKIN	0.249384
		ERBB2	EIF3A	Y382	NetworKIN	-0.252486		ERBB2	EIF3A	Y382	NetworKIN	-0.125322		ERBB2	EIF3A	Y382	NetworKIN	-0.317823		ERBB2	EIF3A	Y382	NetworKIN	-0.182532
		ERBB2	CTTN	Y421	NetworKIN	0.671985		ERBB2	CTTN	Y421	NetworKIN	1.02074		ERBB2	CTTN	Y421	NetworKIN	0.0566583		ERBB2	CTTN	Y421	NetworKIN	0.94447
		ERBB2	VIM	Y53	NetworKIN	-0.0104337		ERBB2	VIM	Y53	NetworKIN	0.136648		ERBB2	VIM	Y53	NetworKIN	0.319514		ERBB2	VIM	Y53	NetworKIN	0.272876
		ERBB2	PGK1	Y76	NetworKIN	-0.45463		ERBB2	PGK1	Y76	NetworKIN	-0.372162		ERBB2	PGK1	Y76	NetworKIN	-0.212212		ERBB2	PGK1	Y76	NetworKIN	-0.221725
		ERBB2	PXN	Y88	NetworKIN	-0.13133		ERBB2	PXN	Y88	NetworKIN	-0.0714683		ERBB2	PXN	Y88	NetworKIN	-0.108439		ERBB2	PXN	Y88	NetworKIN	0.197437
		ERBB4	STAT5B	Y699	NetworKIN	3.09371		ERBB4	STAT5B	Y699	NetworKIN	2.77338		ERBB4	STAT5B	Y699	NetworKIN	0.404187		ERBB4	STAT5B	Y699	NetworKIN	1.02216
		FGR	NGEF	Y179	NetworKIN	-0.34715		FGR	NGEF	Y179	NetworKIN	0.35893		FGR	NGEF	Y179	NetworKIN	-0.31736		FGR	NGEF	Y179	NetworKIN	0.0837749
		FGR	MAPK14	Y182	NetworKIN	0.204864		FGR	MAPK14	Y182	NetworKIN	-0.00322789		FGR	MAPK14	Y182	NetworKIN	-0.768601		FGR	MAPK14	Y182	NetworKIN	-0.71028
		FGR	PXN	Y88	NetworKIN	-0.13133		FGR	PXN	Y88	NetworKIN	-0.0714683		FGR	PXN	Y88	NetworKIN	-0.108439		FGR	PXN	Y88	NetworKIN	0.197437
		FYN	WASL	Y256	NetworKIN	-1.60156		FYN	WASL	Y256	NetworKIN	-1.42531		FYN	WASL	Y256	NetworKIN	-1.0503		FYN	WASL	Y256	NetworKIN	-1.52653
		FYN	CTTN	Y421	NetworKIN	0.671985		FYN	CTTN	Y421	NetworKIN	1.02074		FYN	CTTN	Y421	NetworKIN	0.0566583		FYN	CTTN	Y421	NetworKIN	0.94447
		GRK1	ADRB2	S246	NetworKIN	-0.166579		GRK1	ADRB2	S246	NetworKIN	0.0461301		GRK1	ADRB2	S246	NetworKIN	-0.0882885		GRK1	ADRB2	S246	NetworKIN	-0.451089
		GRK1	CAV1	S37	NetworKIN	0.0594972		GRK1	CAV1	S37	NetworKIN	-0.0155662		GRK1	CAV1	S37	NetworKIN	-0.0691817		GRK1	CAV1	S37	NetworKIN	0.138155
		GRK1	PRKAR2A	S58	NetworKIN	-0.0166637		GRK1	PRKAR2A	S58	NetworKIN	-0.0823947		GRK1	PRKAR2A	S58	NetworKIN	-0.231985		GRK1	PRKAR2A	S58	NetworKIN	-0.158718
		GRK1	PRKAR2A	S78	NetworKIN	0.0231678		GRK1	PRKAR2A	S78	NetworKIN	0.0677798		GRK1	PRKAR2A	S78	NetworKIN	0.00315091		GRK1	PRKAR2A	S78	NetworKIN	0.181608
		GRK1	PRKAR2A	S80	NetworKIN	0.310193		GRK1	PRKAR2A	S80	NetworKIN	0.0535732		GRK1	PRKAR2A	S80	NetworKIN	0.33025		GRK1	PRKAR2A	S80	NetworKIN	0.503573
		GRK1	ZFP36L1	S92	NetworKIN	0.178247		GRK1	ZFP36L1	S92	NetworKIN	0.227916		GRK1	ZFP36L1	S92	NetworKIN	0.564173		GRK1	ZFP36L1	S92	NetworKIN	0.529919
		GRK1	AR	S96	NetworKIN	-0.106137		GRK1	AR	S96	NetworKIN	0.440784		GRK1	AR	S96	NetworKIN	-0.529494		GRK1	AR	S96	NetworKIN	-0.505363
		GRK1	PRKAR2A	S99	NetworKIN	0.364506		GRK1	PRKAR2A	S99	NetworKIN	0.154254		GRK1	PRKAR2A	S99	NetworKIN	0.0751869		GRK1	PRKAR2A	S99	NetworKIN	0.236818
		GRK1	MAPK14	T175	NetworKIN	-0.483801		GRK1	MAPK14	T175	NetworKIN	-0.0678896		GRK1	MAPK14	T175	NetworKIN	-0.906416		GRK1	MAPK14	T175	NetworKIN	-0.58786
		GRK1	MAPK14	T180	NetworKIN	-0.406813		GRK1	MAPK14	T180	NetworKIN	0.90324		GRK1	MAPK14	T180	NetworKIN	-0.607261		GRK1	MAPK14	T180	NetworKIN	-0.165013
		GRK1	PRKAR2A	T54	NetworKIN	-0.0859097		GRK1	PRKAR2A	T54	NetworKIN	-0.0331573		GRK1	PRKAR2A	T54	NetworKIN	-0.11137		GRK1	PRKAR2A	T54	NetworKIN	-0.0886254
		GRK4	ADRB2	S246	NetworKIN	-0.166579		GRK4	ADRB2	S246	NetworKIN	0.0461301		GRK4	ADRB2	S246	NetworKIN	-0.0882885		GRK4	ADRB2	S246	NetworKIN	-0.451089
		GRK4	LYAR	S276	NetworKIN	-0.271886		GRK4	LYAR	S276	NetworKIN	-0.0700088		GRK4	LYAR	S276	NetworKIN	0.0152024		GRK4	LYAR	S276	NetworKIN	-0.178489
		GRK4	ARRB1	S412	NetworKIN	-0.48373		GRK4	ARRB1	S412	NetworKIN	-0.344142		GRK4	ARRB1	S412	NetworKIN	-0.49657		GRK4	ARRB1	S412	NetworKIN	-0.316968
		GRK5	ADRB2	S246	NetworKIN	-0.166579		GRK5	ADRB2	S246	NetworKIN	0.0461301		GRK5	ADRB2	S246	NetworKIN	-0.0882885		GRK5	ADRB2	S246	NetworKIN	-0.451089
		GRK5	LTB4R	S320	NetworKIN	1.30756		GRK5	LTB4R	S320	NetworKIN	0.495965		GRK5	LTB4R	S320	NetworKIN	1.71336		GRK5	LTB4R	S320	NetworKIN	0.267466
		GRK5	CAV1	S37	NetworKIN	0.0594972		GRK5	CAV1	S37	NetworKIN	-0.0155662		GRK5	CAV1	S37	NetworKIN	-0.0691817		GRK5	CAV1	S37	NetworKIN	0.138155
		GRK5	ARRB1	S412	NetworKIN	-0.48373		GRK5	ARRB1	S412	NetworKIN	-0.344142		GRK5	ARRB1	S412	NetworKIN	-0.49657		GRK5	ARRB1	S412	NetworKIN	-0.316968
		GRK5	PRKAR2A	S58	NetworKIN	-0.0166637		GRK5	PRKAR2A	S58	NetworKIN	-0.0823947		GRK5	PRKAR2A	S58	NetworKIN	-0.231985		GRK5	PRKAR2A	S58	NetworKIN	-0.158718
		GRK5	PRKAR2A	S78	NetworKIN	0.0231678		GRK5	PRKAR2A	S78	NetworKIN	0.0677798		GRK5	PRKAR2A	S78	NetworKIN	0.00315091		GRK5	PRKAR2A	S78	NetworKIN	0.181608
		GRK5	PRKAR2A	S80	NetworKIN	0.310193		GRK5	PRKAR2A	S80	NetworKIN	0.0535732		GRK5	PRKAR2A	S80	NetworKIN	0.33025		GRK5	PRKAR2A	S80	NetworKIN	0.503573
		GRK5	PRKAR2A	S99	NetworKIN	0.364506		GRK5	PRKAR2A	S99	NetworKIN	0.154254		GRK5	PRKAR2A	S99	NetworKIN	0.0751869		GRK5	PRKAR2A	S99	NetworKIN	0.236818
		GRK5	PRKAR2A	T54	NetworKIN	-0.0859097		GRK5	PRKAR2A	T54	NetworKIN	-0.0331573		GRK5	PRKAR2A	T54	NetworKIN	-0.11137		GRK5	PRKAR2A	T54	NetworKIN	-0.0886254
		GRK6	PLEK	S117	NetworKIN	1.0642		GRK6	PLEK	S117	NetworKIN	2.63249		GRK6	PLEK	S117	NetworKIN	0.623806		GRK6	PLEK	S117	NetworKIN	1.11687
		GRK6	ADRB2	S246	NetworKIN	-0.166579		GRK6	ADRB2	S246	NetworKIN	0.0461301		GRK6	ADRB2	S246	NetworKIN	-0.0882885		GRK6	ADRB2	S246	NetworKIN	-0.451089
		GRK6	SLC9A3R1	S290	NetworKIN	-0.222462		GRK6	SLC9A3R1	S290	NetworKIN	0.152546		GRK6	SLC9A3R1	S290	NetworKIN	-0.26415		GRK6	SLC9A3R1	S290	NetworKIN	0.149848
		GRK6	LTB4R	S320	NetworKIN	1.30756		GRK6	LTB4R	S320	NetworKIN	0.495965		GRK6	LTB4R	S320	NetworKIN	1.71336		GRK6	LTB4R	S320	NetworKIN	0.267466
		GRK6	ARRB1	S412	NetworKIN	-0.48373		GRK6	ARRB1	S412	NetworKIN	-0.344142		GRK6	ARRB1	S412	NetworKIN	-0.49657		GRK6	ARRB1	S412	NetworKIN	-0.316968
		GRK7	ADRB2	S246	NetworKIN	-0.166579		GRK7	ADRB2	S246	NetworKIN	0.0461301		GRK7	ADRB2	S246	NetworKIN	-0.0882885		GRK7	ADRB2	S246	NetworKIN	-0.451089
		GRK7	PRKAR2A	S58	NetworKIN	-0.0166637		GRK7	PRKAR2A	S58	NetworKIN	-0.0823947		GRK7	PRKAR2A	S58	NetworKIN	-0.231985		GRK7	PRKAR2A	S58	NetworKIN	-0.158718
		GRK7	PRKAR2A	S78	NetworKIN	0.0231678		GRK7	PRKAR2A	S78	NetworKIN	0.0677798		GRK7	PRKAR2A	S78	NetworKIN	0.00315091		GRK7	PRKAR2A	S78	NetworKIN	0.181608
		GRK7	PRKAR2A	S80	NetworKIN	0.310193		GRK7	PRKAR2A	S80	NetworKIN	0.0535732		GRK7	PRKAR2A	S80	NetworKIN	0.33025		GRK7	PRKAR2A	S80	NetworKIN	0.503573
		GRK7	PRKAR2A	S99	NetworKIN	0.364506		GRK7	PRKAR2A	S99	NetworKIN	0.154254		GRK7	PRKAR2A	S99	NetworKIN	0.0751869		GRK7	PRKAR2A	S99	NetworKIN	0.236818
		GRK7	PRKAR2A	T54	NetworKIN	-0.0859097		GRK7	PRKAR2A	T54	NetworKIN	-0.0331573		GRK7	PRKAR2A	T54	NetworKIN	-0.11137		GRK7	PRKAR2A	T54	NetworKIN	-0.0886254
		GSK3A	CDKN1B	S10	NetworKIN	-0.569669		GSK3A	CDKN1B	S10	NetworKIN	-0.469392		GSK3A	CDKN1B	S10	NetworKIN	-0.335243		GSK3A	CDKN1B	S10	NetworKIN	-0.187349
		GSK3A	APC	S1042	NetworKIN	0.432417		GSK3A	APC	S1042	NetworKIN	0.192107		GSK3A	APC	S1042	NetworKIN	-0.0043577		GSK3A	APC	S1042	NetworKIN	0.748563
		GSK3A	PXN	S106	NetworKIN	0.0104198		GSK3A	PXN	S106	NetworKIN	0.034827		GSK3A	PXN	S106	NetworKIN	-0.477354		GSK3A	PXN	S106	NetworKIN	-0.0800512
		GSK3A	CLASP1	S1091	NetworKIN	-0.316505		GSK3A	CLASP1	S1091	NetworKIN	-0.215312		GSK3A	CLASP1	S1091	NetworKIN	-0.277838		GSK3A	CLASP1	S1091	NetworKIN	0.1171
		GSK3A	IRS2	S1100	NetworKIN	-0.172896		GSK3A	IRS2	S1100	NetworKIN	0.0354872		GSK3A	IRS2	S1100	NetworKIN	-0.0253578		GSK3A	IRS2	S1100	NetworKIN	0.101172
		GSK3A	CLASP1	S1223	NetworKIN	-0.616068		GSK3A	CLASP1	S1223	NetworKIN	-0.378943		GSK3A	CLASP1	S1223	NetworKIN	-0.328484		GSK3A	CLASP1	S1223	NetworKIN	0.126223
		GSK3A	MAP1B	S1256	NetworKIN	0.109832		GSK3A	MAP1B	S1256	NetworKIN	0.453652		GSK3A	MAP1B	S1256	NetworKIN	0.144163		GSK3A	MAP1B	S1256	NetworKIN	0.18723
		GSK3A	MTOR	S1261	NetworKIN	1.57622		GSK3A	MTOR	S1261	NetworKIN	0.481325		GSK3A	MTOR	S1261	NetworKIN	0.0617946		GSK3A	MTOR	S1261	NetworKIN	0.356927
		GSK3A	MAP1B	S1265	NetworKIN	-0.0980546		GSK3A	MAP1B	S1265	NetworKIN	0.145732		GSK3A	MAP1B	S1265	NetworKIN	-0.0287158		GSK3A	MAP1B	S1265	NetworKIN	0.248489
		GSK3A	TSC2	S1371	NetworKIN	-0.478743		GSK3A	TSC2	S1371	NetworKIN	-0.547875		GSK3A	TSC2	S1371	NetworKIN	-0.23659		GSK3A	TSC2	S1371	NetworKIN	-0.374828
		GSK3A	TSC2	S1383	NetworKIN	0.600879		GSK3A	TSC2	S1383	NetworKIN	0.45203		GSK3A	TSC2	S1383	NetworKIN	0.279282		GSK3A	TSC2	S1383	NetworKIN	0.226842
		GSK3A	TSC2	S1387	NetworKIN	0.108323		GSK3A	TSC2	S1387	NetworKIN	-0.0986966		GSK3A	TSC2	S1387	NetworKIN	-0.0222436		GSK3A	TSC2	S1387	NetworKIN	0.30422
		GSK3A	MAP1B	S1400	NetworKIN	0.417992		GSK3A	MAP1B	S1400	NetworKIN	0.481615		GSK3A	MAP1B	S1400	NetworKIN	0.475402		GSK3A	MAP1B	S1400	NetworKIN	0.76204
		GSK3A	TSC2	S1411	NetworKIN	-0.217834		GSK3A	TSC2	S1411	NetworKIN	-0.248077		GSK3A	TSC2	S1411	NetworKIN	-0.295882		GSK3A	TSC2	S1411	NetworKIN	-0.173069
		GSK3A	MAP1B	S1427	NetworKIN	-0.0730376		GSK3A	MAP1B	S1427	NetworKIN	-0.484009		GSK3A	MAP1B	S1427	NetworKIN	0.126065		GSK3A	MAP1B	S1427	NetworKIN	0.145225
		GSK3A	CLIP1	S143	NetworKIN	-0.189228		GSK3A	CLIP1	S143	NetworKIN	-0.0844269		GSK3A	CLIP1	S143	NetworKIN	-0.0938066		GSK3A	CLIP1	S143	NetworKIN	0.0292434
		GSK3A	MAP1B	S1438	NetworKIN	-0.497654		GSK3A	MAP1B	S1438	NetworKIN	0.0285366		GSK3A	MAP1B	S1438	NetworKIN	-0.291281		GSK3A	MAP1B	S1438	NetworKIN	0.0448723
		GSK3A	CLIP1	S147	NetworKIN	-0.331928		GSK3A	CLIP1	S147	NetworKIN	-0.211063		GSK3A	CLIP1	S147	NetworKIN	-0.434687		GSK3A	CLIP1	S147	NetworKIN	-0.234944
		GSK3A	MAP1B	S1501	NetworKIN	0.0861649		GSK3A	MAP1B	S1501	NetworKIN	0.040069		GSK3A	MAP1B	S1501	NetworKIN	0.0218512		GSK3A	MAP1B	S1501	NetworKIN	0.433025
		GSK3A	AKAP11	S1580	NetworKIN	0.0746521		GSK3A	AKAP11	S1580	NetworKIN	-0.183449		GSK3A	AKAP11	S1580	NetworKIN	-0.19669		GSK3A	AKAP11	S1580	NetworKIN	0.111312
		GSK3A	IRF3	S173	NetworKIN	-0.448969		GSK3A	IRF3	S173	NetworKIN	-0.165287		GSK3A	IRF3	S173	NetworKIN	-0.113078		GSK3A	IRF3	S173	NetworKIN	-0.367672
		GSK3A	MAP1B	S1772	NetworKIN	-0.0100251		GSK3A	MAP1B	S1772	NetworKIN	0.202755		GSK3A	MAP1B	S1772	NetworKIN	0.19807		GSK3A	MAP1B	S1772	NetworKIN	0.203484
		GSK3A	MAP1B	S1779	NetworKIN	-0.021334		GSK3A	MAP1B	S1779	NetworKIN	-0.194454		GSK3A	MAP1B	S1779	NetworKIN	-0.329492		GSK3A	MAP1B	S1779	NetworKIN	-0.11386
		GSK3A	CDKN1B	S178	NetworKIN	-0.452264		GSK3A	CDKN1B	S178	NetworKIN	0.0206536		GSK3A	CDKN1B	S178	NetworKIN	-0.316603		GSK3A	CDKN1B	S178	NetworKIN	-0.18725
		GSK3A	MAP1B	S1785	NetworKIN	0.0763027		GSK3A	MAP1B	S1785	NetworKIN	0.104213		GSK3A	MAP1B	S1785	NetworKIN	0.402777		GSK3A	MAP1B	S1785	NetworKIN	0.0925036
		GSK3A	LMNA	S18	NetworKIN	0.155893		GSK3A	LMNA	S18	NetworKIN	-0.00493857		GSK3A	LMNA	S18	NetworKIN	-0.257076		GSK3A	LMNA	S18	NetworKIN	0.17347
		GSK3A	PPP1R2	S20	NetworKIN	-0.804556		GSK3A	PPP1R2	S20	NetworKIN	-0.364553		GSK3A	PPP1R2	S20	NetworKIN	-0.314021		GSK3A	PPP1R2	S20	NetworKIN	-0.802423
		GSK3A	CLIP1	S200	NetworKIN	-0.607997		GSK3A	CLIP1	S200	NetworKIN	-0.627363		GSK3A	CLIP1	S200	NetworKIN	-0.42381		GSK3A	CLIP1	S200	NetworKIN	-0.239492
		GSK3A	CLIP1	S204	NetworKIN	-0.591666		GSK3A	CLIP1	S204	NetworKIN	-0.290406		GSK3A	CLIP1	S204	NetworKIN	-0.44192		GSK3A	CLIP1	S204	NetworKIN	-0.0971192
		GSK3A	MAP1B	S2098	NetworKIN	0.219194		GSK3A	MAP1B	S2098	NetworKIN	0.305884		GSK3A	MAP1B	S2098	NetworKIN	-0.0205365		GSK3A	MAP1B	S2098	NetworKIN	0.336128
		GSK3A	GSK3A	S21	NetworKIN	-0.0101347		GSK3A	GSK3A	S21	NetworKIN	-0.033481		GSK3A	GSK3A	S21	NetworKIN	-0.199225		GSK3A	GSK3A	S21	NetworKIN	0.0790358
		GSK3A	LMNA	S22	NetworKIN	0.394874		GSK3A	LMNA	S22	NetworKIN	0.153555		GSK3A	LMNA	S22	NetworKIN	0.174917		GSK3A	LMNA	S22	NetworKIN	0.332377
		GSK3A	APC	S2260	NetworKIN	-0.328261		GSK3A	APC	S2260	NetworKIN	-0.332934		GSK3A	APC	S2260	NetworKIN	-0.0969007		GSK3A	APC	S2260	NetworKIN	-0.0269463
		GSK3A	APC	S2674	NetworKIN	0.0863284		GSK3A	APC	S2674	NetworKIN	0.223757		GSK3A	APC	S2674	NetworKIN	-0.00459946		GSK3A	APC	S2674	NetworKIN	0.713875
		GSK3A	SSR1	S268	NetworKIN	-0.606901		GSK3A	SSR1	S268	NetworKIN	-0.245458		GSK3A	SSR1	S268	NetworKIN	-0.241656		GSK3A	SSR1	S268	NetworKIN	-0.215092
		GSK3A	IRS1	S270	NetworKIN	0.0203466		GSK3A	IRS1	S270	NetworKIN	0.0346936		GSK3A	IRS1	S270	NetworKIN	-0.295139		GSK3A	IRS1	S270	NetworKIN	-0.241222
		GSK3A	FOXO1	S287	NetworKIN	-0.188767		GSK3A	FOXO1	S287	NetworKIN	-0.208214		GSK3A	FOXO1	S287	NetworKIN	-0.186232		GSK3A	FOXO1	S287	NetworKIN	-0.0577884
		GSK3A	HSF1	S303	NetworKIN	0.0242686		GSK3A	HSF1	S303	NetworKIN	-0.186162		GSK3A	HSF1	S303	NetworKIN	-0.133221		GSK3A	HSF1	S303	NetworKIN	0.174412
		GSK3A	FOXO3	S315	NetworKIN	0.282828		GSK3A	FOXO3	S315	NetworKIN	0.103762		GSK3A	FOXO3	S315	NetworKIN	0.745378		GSK3A	FOXO3	S315	NetworKIN	0.405516
		GSK3A	TBC1D4	S318	NetworKIN	-0.109151		GSK3A	TBC1D4	S318	NetworKIN	-0.274352		GSK3A	TBC1D4	S318	NetworKIN	0.34508		GSK3A	TBC1D4	S318	NetworKIN	0.299467
		GSK3A	FOXO1	S319	NetworKIN	-0.197674		GSK3A	FOXO1	S319	NetworKIN	-0.149638		GSK3A	FOXO1	S319	NetworKIN	0.0168004		GSK3A	FOXO1	S319	NetworKIN	0.167697
		GSK3A	WFS1	S32	NetworKIN	-0.450322		GSK3A	WFS1	S32	NetworKIN	-0.129839		GSK3A	WFS1	S32	NetworKIN	-0.292899		GSK3A	WFS1	S32	NetworKIN	-0.400634
		GSK3A	NFYA	S326	NetworKIN	-0.147672		GSK3A	NFYA	S326	NetworKIN	-0.0803995		GSK3A	NFYA	S326	NetworKIN	0.113108		GSK3A	NFYA	S326	NetworKIN	-0.171767
		GSK3A	IRS1	S348	NetworKIN	-0.923015		GSK3A	IRS1	S348	NetworKIN	-0.959854		GSK3A	IRS1	S348	NetworKIN	0.413863		GSK3A	IRS1	S348	NetworKIN	0.075369
		GSK3A	HSF1	S363	NetworKIN	-0.0919769		GSK3A	HSF1	S363	NetworKIN	0.146966		GSK3A	HSF1	S363	NetworKIN	-0.246426		GSK3A	HSF1	S363	NetworKIN	0.144783
		GSK3A	GSK3A	S39	NetworKIN	-0.0509955		GSK3A	GSK3A	S39	NetworKIN	-0.169628		GSK3A	GSK3A	S39	NetworKIN	-0.232374		GSK3A	GSK3A	S39	NetworKIN	0.0200915
		GSK3A	LMNA	S390	NetworKIN	-0.167283		GSK3A	LMNA	S390	NetworKIN	-0.0299631		GSK3A	LMNA	S390	NetworKIN	0.0262404		GSK3A	LMNA	S390	NetworKIN	0.0212656
		GSK3A	LMNA	S392	NetworKIN	-0.0164823		GSK3A	LMNA	S392	NetworKIN	0.0856679		GSK3A	LMNA	S392	NetworKIN	0.106139		GSK3A	LMNA	S392	NetworKIN	0.392978
		GSK3A	LMNA	S403	NetworKIN	-0.42633		GSK3A	LMNA	S403	NetworKIN	-0.256245		GSK3A	LMNA	S403	NetworKIN	0.135724		GSK3A	LMNA	S403	NetworKIN	-0.326834
		GSK3A	LMNA	S407	NetworKIN	0.250099		GSK3A	LMNA	S407	NetworKIN	0.558297		GSK3A	LMNA	S407	NetworKIN	0.438623		GSK3A	LMNA	S407	NetworKIN	0.96032
		GSK3A	GSK3A	S41	NetworKIN	0.0461432		GSK3A	GSK3A	S41	NetworKIN	-0.00476365		GSK3A	GSK3A	S41	NetworKIN	-0.0616279		GSK3A	GSK3A	S41	NetworKIN	0.0612594
		GSK3A	AKAP11	S433	NetworKIN	-0.106502		GSK3A	AKAP11	S433	NetworKIN	0.0138328		GSK3A	AKAP11	S433	NetworKIN	-0.347019		GSK3A	AKAP11	S433	NetworKIN	-0.0947282
		GSK3A	AKAP11	S448	NetworKIN	0.247938		GSK3A	AKAP11	S448	NetworKIN	0.107553		GSK3A	AKAP11	S448	NetworKIN	-0.107278		GSK3A	AKAP11	S448	NetworKIN	0.186282
		GSK3A	SLC2A1	S473	NetworKIN	0.57497		GSK3A	SLC2A1	S473	NetworKIN	0.37921		GSK3A	SLC2A1	S473	NetworKIN	0.528316		GSK3A	SLC2A1	S473	NetworKIN	-0.341879
		GSK3A	SLC2A4	S488	NetworKIN	0.0254061		GSK3A	SLC2A4	S488	NetworKIN	0.271042		GSK3A	SLC2A4	S488	NetworKIN	0.00439387		GSK3A	SLC2A4	S488	NetworKIN	0.319456
		GSK3A	TSC1	S505	NetworKIN	-0.0957961		GSK3A	TSC1	S505	NetworKIN	-0.303977		GSK3A	TSC1	S505	NetworKIN	0.107126		GSK3A	TSC1	S505	NetworKIN	0.290712
		GSK3A	IRS1	S527	NetworKIN	0.0507815		GSK3A	IRS1	S527	NetworKIN	0.159662		GSK3A	IRS1	S527	NetworKIN	-0.348206		GSK3A	IRS1	S527	NetworKIN	0.151421
		GSK3A	SEC31A	S532	NetworKIN	0.298591		GSK3A	SEC31A	S532	NetworKIN	0.508492		GSK3A	SEC31A	S532	NetworKIN	0.12811		GSK3A	SEC31A	S532	NetworKIN	0.75523
		GSK3A	EIF2B5	S544	NetworKIN	-0.325886		GSK3A	EIF2B5	S544	NetworKIN	-0.317238		GSK3A	EIF2B5	S544	NetworKIN	-0.157196		GSK3A	EIF2B5	S544	NetworKIN	-0.113107
		GSK3A	MAP1B	S544	NetworKIN	-0.531161		GSK3A	MAP1B	S544	NetworKIN	-0.24473		GSK3A	MAP1B	S544	NetworKIN	-0.898945		GSK3A	MAP1B	S544	NetworKIN	-0.220689
		GSK3A	CLASP1	S559	NetworKIN	-0.3547		GSK3A	CLASP1	S559	NetworKIN	-0.662916		GSK3A	CLASP1	S559	NetworKIN	-0.335456		GSK3A	CLASP1	S559	NetworKIN	-0.263625
		GSK3A	TBC1D4	S566	NetworKIN	-0.392757		GSK3A	TBC1D4	S566	NetworKIN	-0.441362		GSK3A	TBC1D4	S566	NetworKIN	-0.125707		GSK3A	TBC1D4	S566	NetworKIN	-0.252136
		GSK3A	TBC1D4	S569	NetworKIN	0.0848088		GSK3A	TBC1D4	S569	NetworKIN	0.556557		GSK3A	TBC1D4	S569	NetworKIN	0.646116		GSK3A	TBC1D4	S569	NetworKIN	0.460574
		GSK3A	TBC1D4	S570	NetworKIN	-0.0721877		GSK3A	TBC1D4	S570	NetworKIN	-0.764335		GSK3A	TBC1D4	S570	NetworKIN	0.230664		GSK3A	TBC1D4	S570	NetworKIN	0.172922
		GSK3A	CLASP1	S572	NetworKIN	0.595413		GSK3A	CLASP1	S572	NetworKIN	0.138499		GSK3A	CLASP1	S572	NetworKIN	0.578692		GSK3A	CLASP1	S572	NetworKIN	1.16464
		GSK3A	TBC1D4	S591	NetworKIN	-0.404049		GSK3A	TBC1D4	S591	NetworKIN	-0.263268		GSK3A	TBC1D4	S591	NetworKIN	0.133982		GSK3A	TBC1D4	S591	NetworKIN	0.0871008
		GSK3A	LMNA	S616	NetworKIN	0.194883		GSK3A	LMNA	S616	NetworKIN	0.165823		GSK3A	LMNA	S616	NetworKIN	-0.326456		GSK3A	LMNA	S616	NetworKIN	-0.0281992
		GSK3A	LMNA	S632	NetworKIN	0.697441		GSK3A	LMNA	S632	NetworKIN	2.15755		GSK3A	LMNA	S632	NetworKIN	0.15503		GSK3A	LMNA	S632	NetworKIN	1.16587
		GSK3A	IRS1	S636	NetworKIN	-0.0857303		GSK3A	IRS1	S636	NetworKIN	-0.141597		GSK3A	IRS1	S636	NetworKIN	-0.230654		GSK3A	IRS1	S636	NetworKIN	0.310924
		GSK3A	RBL2	S639	NetworKIN	-0.464092		GSK3A	RBL2	S639	NetworKIN	0.205596		GSK3A	RBL2	S639	NetworKIN	-0.00732032		GSK3A	RBL2	S639	NetworKIN	-0.00606948
		GSK3A	GYS1	S641	NetworKIN	-0.138167		GSK3A	GYS1	S641	NetworKIN	0.119376		GSK3A	GYS1	S641	NetworKIN	0.00964814		GSK3A	GYS1	S641	NetworKIN	0.136423
		GSK3A	GYS1	S645	NetworKIN	-0.237657		GSK3A	GYS1	S645	NetworKIN	-0.10247		GSK3A	GYS1	S645	NetworKIN	-0.169047		GSK3A	GYS1	S645	NetworKIN	-0.039705
		GSK3A	GYS1	S647	NetworKIN	0.343332		GSK3A	GYS1	S647	NetworKIN	0.666238		GSK3A	GYS1	S647	NetworKIN	0.0342966		GSK3A	GYS1	S647	NetworKIN	0.551785
		GSK3A	CLASP1	S649	NetworKIN	-0.604381		GSK3A	CLASP1	S649	NetworKIN	-0.400745		GSK3A	CLASP1	S649	NetworKIN	-0.649882		GSK3A	CLASP1	S649	NetworKIN	-0.325015
		GSK3A	LMNA	S652	NetworKIN	0.570389		GSK3A	LMNA	S652	NetworKIN	0.663123		GSK3A	LMNA	S652	NetworKIN	-0.00568196		GSK3A	LMNA	S652	NetworKIN	0.515097
		GSK3A	GYS1	S653	NetworKIN	0.734321		GSK3A	GYS1	S653	NetworKIN	0.0189467		GSK3A	GYS1	S653	NetworKIN	0.552665		GSK3A	GYS1	S653	NetworKIN	0.306924
		GSK3A	GYS1	S657	NetworKIN	1.36282		GSK3A	GYS1	S657	NetworKIN	0.0703245		GSK3A	GYS1	S657	NetworKIN	0.844052		GSK3A	GYS1	S657	NetworKIN	0.695759
		GSK3A	ZCCHC8	S658	NetworKIN	0.209311		GSK3A	ZCCHC8	S658	NetworKIN	0.168026		GSK3A	ZCCHC8	S658	NetworKIN	0.0676146		GSK3A	ZCCHC8	S658	NetworKIN	-0.0658868
		GSK3A	GYS1	S698	NetworKIN	-0.864067		GSK3A	GYS1	S698	NetworKIN	-0.126096		GSK3A	GYS1	S698	NetworKIN	-0.225298		GSK3A	GYS1	S698	NetworKIN	0.414876
		GSK3A	CLASP1	S714	NetworKIN	0.339619		GSK3A	CLASP1	S714	NetworKIN	-0.0560427		GSK3A	CLASP1	S714	NetworKIN	0.529855		GSK3A	CLASP1	S714	NetworKIN	0.121876
		GSK3A	GYS1	S727	NetworKIN	0.505409		GSK3A	GYS1	S727	NetworKIN	0.150474		GSK3A	GYS1	S727	NetworKIN	0.188686		GSK3A	GYS1	S727	NetworKIN	0.195404
		GSK3A	STAT3	S727	NetworKIN	0.339506		GSK3A	STAT3	S727	NetworKIN	0.186147		GSK3A	STAT3	S727	NetworKIN	-0.0331908		GSK3A	STAT3	S727	NetworKIN	0.114411
		GSK3A	BAD	S75	NetworKIN	0.0232766		GSK3A	BAD	S75	NetworKIN	0.511905		GSK3A	BAD	S75	NetworKIN	-0.344185		GSK3A	BAD	S75	NetworKIN	0.167307
		GSK3A	TBC1D4	S754	NetworKIN	-0.17794		GSK3A	TBC1D4	S754	NetworKIN	-0.195837		GSK3A	TBC1D4	S754	NetworKIN	-0.204847		GSK3A	TBC1D4	S754	NetworKIN	-0.0553822
		GSK3A	SEC31A	S799	NetworKIN	-0.217091		GSK3A	SEC31A	S799	NetworKIN	-0.143193		GSK3A	SEC31A	S799	NetworKIN	-0.198663		GSK3A	SEC31A	S799	NetworKIN	0.0139024
		GSK3A	PXN	S83	NetworKIN	-0.148487		GSK3A	PXN	S83	NetworKIN	-0.0648253		GSK3A	PXN	S83	NetworKIN	-0.247021		GSK3A	PXN	S83	NetworKIN	0.217149
		GSK3A	PXN	S85	NetworKIN	-0.0335832		GSK3A	PXN	S85	NetworKIN	-0.0489264		GSK3A	PXN	S85	NetworKIN	-0.172548		GSK3A	PXN	S85	NetworKIN	0.135288
		GSK3A	PXN	S91	NetworKIN	-0.0278912		GSK3A	PXN	S91	NetworKIN	-0.0394257		GSK3A	PXN	S91	NetworKIN	0.373457		GSK3A	PXN	S91	NetworKIN	0.290131
		GSK3A	AR	S96	NetworKIN	-0.106137		GSK3A	AR	S96	NetworKIN	0.440784		GSK3A	AR	S96	NetworKIN	-0.529494		GSK3A	AR	S96	NetworKIN	-0.505363
		GSK3A	CASP9	S99	NetworKIN	-1.18114		GSK3A	CASP9	S99	NetworKIN	-0.666611		GSK3A	CASP9	S99	NetworKIN	-1.02669		GSK3A	CASP9	S99	NetworKIN	-0.915613
		GSK3A	MAP1B	T1067	NetworKIN	-0.02448		GSK3A	MAP1B	T1067	NetworKIN	0.0925014		GSK3A	MAP1B	T1067	NetworKIN	-0.400795		GSK3A	MAP1B	T1067	NetworKIN	0.107702
		GSK3A	MAP1B	T1788	NetworKIN	-0.602114		GSK3A	MAP1B	T1788	NetworKIN	-0.211821		GSK3A	MAP1B	T1788	NetworKIN	-0.255647		GSK3A	MAP1B	T1788	NetworKIN	-0.512466
		GSK3A	CLIP1	T182	NetworKIN	-0.645717		GSK3A	CLIP1	T182	NetworKIN	-0.429814		GSK3A	CLIP1	T182	NetworKIN	-0.541343		GSK3A	CLIP1	T182	NetworKIN	-0.537954
		GSK3A	LMNA	T19	NetworKIN	0.379572		GSK3A	LMNA	T19	NetworKIN	0.188463		GSK3A	LMNA	T19	NetworKIN	0.127285		GSK3A	LMNA	T19	NetworKIN	0.355822
		GSK3A	PRKACA	T198	NetworKIN	-0.302943		GSK3A	PRKACA	T198	NetworKIN	-0.10909		GSK3A	PRKACA	T198	NetworKIN	0.202844		GSK3A	PRKACA	T198	NetworKIN	0.223321
		GSK3A	LMNA	T24	NetworKIN	-0.203354		GSK3A	LMNA	T24	NetworKIN	0.13599		GSK3A	LMNA	T24	NetworKIN	-0.171343		GSK3A	LMNA	T24	NetworKIN	0.0651492
		GSK3A	EIF4EBP1	T37	NetworKIN	0.0573973		GSK3A	EIF4EBP1	T37	NetworKIN	0.147867		GSK3A	EIF4EBP1	T37	NetworKIN	0.123695		GSK3A	EIF4EBP1	T37	NetworKIN	0.338825
		GSK3A	EIF4EBP1	T41	NetworKIN	-1.06096		GSK3A	EIF4EBP1	T41	NetworKIN	-0.627792		GSK3A	EIF4EBP1	T41	NetworKIN	-0.108944		GSK3A	EIF4EBP1	T41	NetworKIN	-0.250171
		GSK3A	EIF4EBP1	T45	NetworKIN	-0.318009		GSK3A	EIF4EBP1	T45	NetworKIN	-0.061748		GSK3A	EIF4EBP1	T45	NetworKIN	-0.309611		GSK3A	EIF4EBP1	T45	NetworKIN	0.108782
		GSK3A	AKT2	T451	NetworKIN	-0.233226		GSK3A	AKT2	T451	NetworKIN	-0.000166238		GSK3A	AKT2	T451	NetworKIN	-0.287194		GSK3A	AKT2	T451	NetworKIN	-0.063267
		GSK3A	EIF4EBP1	T46	NetworKIN	-0.500107		GSK3A	EIF4EBP1	T46	NetworKIN	-0.257663		GSK3A	EIF4EBP1	T46	NetworKIN	-0.49331		GSK3A	EIF4EBP1	T46	NetworKIN	-0.250636
		GSK3A	SLC2A1	T478	NetworKIN	1.47257		GSK3A	SLC2A1	T478	NetworKIN	2.9273		GSK3A	SLC2A1	T478	NetworKIN	1.06087		GSK3A	SLC2A1	T478	NetworKIN	1.11902
		GSK3A	ZCCHC8	T479	NetworKIN	0.0629652		GSK3A	ZCCHC8	T479	NetworKIN	0.219212		GSK3A	ZCCHC8	T479	NetworKIN	-0.388664		GSK3A	ZCCHC8	T479	NetworKIN	0.193413
		GSK3A	PRKCA	T497	NetworKIN	0.0604465		GSK3A	PRKCA	T497	NetworKIN	0.320043		GSK3A	PRKCA	T497	NetworKIN	0.0135482		GSK3A	PRKCA	T497	NetworKIN	0.0267949
		GSK3A	IRS1	T530	NetworKIN	-1.54654		GSK3A	IRS1	T530	NetworKIN	-1.38042		GSK3A	IRS1	T530	NetworKIN	-0.211666		GSK3A	IRS1	T530	NetworKIN	-0.45964
		GSK3A	EIF4EBP1	T68	NetworKIN	0.407571		GSK3A	EIF4EBP1	T68	NetworKIN	0.636081		GSK3A	EIF4EBP1	T68	NetworKIN	0.367748		GSK3A	EIF4EBP1	T68	NetworKIN	0.200482
		GSK3A	CLASP1	T711	NetworKIN	-0.150301		GSK3A	CLASP1	T711	NetworKIN	-0.368128		GSK3A	CLASP1	T711	NetworKIN	-0.207179		GSK3A	CLASP1	T711	NetworKIN	0.210008
		GSK3A	STAT3	T714	NetworKIN	0.271959		GSK3A	STAT3	T714	NetworKIN	0.311242		GSK3A	STAT3	T714	NetworKIN	0.00649104		GSK3A	STAT3	T714	NetworKIN	0.329026
		GSK3A	GYS1	T721	NetworKIN	-0.10718		GSK3A	GYS1	T721	NetworKIN	-0.0133014		GSK3A	GYS1	T721	NetworKIN	-0.199102		GSK3A	GYS1	T721	NetworKIN	0.00269832
		GSK3A	EIF4EBP1	T77	NetworKIN	0.656836		GSK3A	EIF4EBP1	T77	NetworKIN	0.51858		GSK3A	EIF4EBP1	T77	NetworKIN	0.573166		GSK3A	EIF4EBP1	T77	NetworKIN	0.168948
		GSK3B	CDKN1B	S10	NetworKIN	-0.569669		GSK3B	CDKN1B	S10	NetworKIN	-0.469392		GSK3B	CDKN1B	S10	NetworKIN	-0.335243		GSK3B	CDKN1B	S10	NetworKIN	-0.187349
		GSK3B	APC	S1042	NetworKIN	0.432417		GSK3B	APC	S1042	NetworKIN	0.192107		GSK3B	APC	S1042	NetworKIN	-0.0043577		GSK3B	APC	S1042	NetworKIN	0.748563
		GSK3B	PXN	S106	NetworKIN	0.0104198		GSK3B	PXN	S106	NetworKIN	0.034827		GSK3B	PXN	S106	NetworKIN	-0.477354		GSK3B	PXN	S106	NetworKIN	-0.0800512
		GSK3B	CLASP1	S1091	NetworKIN	-0.316505		GSK3B	CLASP1	S1091	NetworKIN	-0.215312		GSK3B	CLASP1	S1091	NetworKIN	-0.277838		GSK3B	CLASP1	S1091	NetworKIN	0.1171
[truncated: 4,345 more rows]
