# Supplementary material for: Identification of a Resistance Exercise-Specific Signaling Pathway that Drives Skeletal Muscle Growth
Source: Research Square preprint supplement (doi:10.21203/rs.3.rs-4997138/v1), 2024-11-12
Supplement: Supplementary file 4 [file 8628a1b12e96944b456f5bf9.xlsx]

## Sheet: Post PhosR 
Fasta header	Uniprot	Gene Name	Site	Sequence	Peptide #		PhosR log2 Pre Subject A	PhosR log2 0 hr END Subject A	PhosR log2 0 hr RE Subject A	PhosR log2 3 hr END Subject A	PhosR log2 3 hr RE Subject A		PhosR log2 Pre Subject B	PhosR log2 0 hr END Subject B	PhosR log2 0 hr RE Subject B	PhosR log2 3 hr END Subject B	PhosR log2 3 hr RE Subject B		PhosR log2 Pre Subject C	PhosR log2 0 hr END Subject C	PhosR log2 0 hr RE Subject C	PhosR log2 3 hr END Subject C	PhosR log2 3 hr RE Subject C		PhosR log2 Pre Subject D	PhosR log2 0 hr END Subject D	PhosR log2 0 hr RE Subject D	PhosR log2 3 hr END Subject D	PhosR log2 3 hr RE Subject D			PhosR log2 FC 0 hr END vs. Pre	PhosR 0 hr END vs. Pre adj.P.Val		PhosR log2 FC 0 hr RE vs. Pre	PhosR 0 hr RE vs. Pre adj.P.Val		PhosR log2 FC 3 hr END vs. Pre	PhosR 3 hr END vs. Pre adj P.Val		PhosR log2 FC 3 hr RE vs. Pre	PhosR 3 hr RE vs. Pre adj.P.Val		Cluster 1	Cluster 2	Cluster 3	Cluster 4		GOTERM_BP_DIRECT
>sp|Q14693|LPIN1_HUMAN Phosphatidate phosphatase LPIN1 OS=Homo sapiens OX=9606 GN=LPIN1 PE=1 SV=2S(611)	Q14693	LPIN1	S(611)	HESSSSDEERAAAKPSGHLPLLPNVSYKK	Peptide1		-0.621857	-0.920597	-0.578659	-0.898382	-0.706606		0						-0.510393	-0.737764	-0.439425	-0.862674	-0.576252									-0.263055	0.302779		0.0570827	0.894942		-0.314403	0.265708		-0.0753037	0.827717		0	0.726121	0	0		D-templated;GO:0006351~transcription;GO:0006357~regulation of transcription from R polymerase II promoter;GO:0006642~triglyceride mobilization;GO:0006646~phosphatidylethanolamine biosynthetic process;GO:0006656~phosphatidylcholine biosynthetic process;GO:0007077~mitotic nuclear envelope disassembly;GO:0009062~fatty acid catabolic process;GO:0016311~dephosphorylation;GO:0019432~triglyceride biosyn…
>sp|O60784|TOM1_HUMAN Target of Myb protein 1 OS=Homo sapiens OX=9606 GN=TOM1 PE=1 SV=2S(462)	O60784	TOM1	S(462)	LEERAKAADRLPNLSSPSAEGPPGPPSGPAP	Peptide10		0.434873	0.882902	0.450331	-0.136091	0.900044		0	1.0668	1.39408	-0.274184	0.478459		0.5936	0.430961	0.712968	0.263326	0.267408		-0.852231	0.953373	1.78757	-0.712299	0.823653			0.789449	0.118989		1.04218	0.0619895		-0.258873	0.66885		0.57333	0.336729		0	0.440203	0	0		GO:0006886~intracellular protein transport;GO:0006897~endocytosis;GO:0015031~protein transport;GO:0016197~endosomal transport
>tr||F5H199|F5H199_HUMAN Methionine-R-sulfoxide reductase B3 (Fragment) OS=Homo sapiens OX=9606 GN=MSRB3 PE=1 SV=1S(27)	F5H199	MSRB3	S(27)	KSQPVALRACGLPSGSCRDKKNCKVVFSQQE	Peptide100		0.307349	-0.238165	-0.184186	0.293523	0.374297		0	-0.320185	-0.327012	0.138234	0.633113		0.224818	0.000550689	-0.180043	0.161965	-0.0508027		0.239309	0.147324	-0.639154	0.60152	0.156			-0.295488	0.245378		-0.525468	0.0571775		0.105942	0.732268		0.0852828	0.814736		0.444321	0	0	0
>sp|Q711Q0|CEFIP_HUMAN Cardiac-enriched FHL2-interacting protein OS=Homo sapiens OX=9606 GN=CEFIP PE=1 SV=2S(844)	Q711Q0	CEFIP	S(844)	ENKGTTFSQAKDLTPSPSSASNRHMLFTIKD	Peptide1000		0.00786129	-0.303255	-0.160072	0.0567747	0.154895		0	-0.19426	-0.223984	0.0685679	0.148809		0.131618	-0.183546	-0.309013	0.00280286	0.0685337		-0.235787	-0.186233	-0.130894	-0.0913234	0.266902			-0.192746	0.16757		-0.181914	0.259399		0.0332825	0.853182		0.183862	0.253114		0.398318	0	0	0
>tr||A6NGQ3|A6NGQ3_HUMAN Obscurin OS=Homo sapiens OX=9606 GN=OBSCN PE=1 SV=5S(7786)	A6NGQ3	OBSCN	S(7786)	VTHSPLLHPRGFLRPSASLPEEAEASERSTE	Peptide10000		0.0674009	0.303456	0.210895	0.150163	0.186358		0	0.464534	0.397611	-0.181585	0.201102		0.211533	0.415536	0.122011	0.309647	-0.175223		-0.085768	0.424677	0.312604	-0.0275246	0.231972			0.353759	0.0575009		0.212488	0.344882		0.0143835	0.954398		0.0627607	0.817946		0	0.3281	0	0		GO:0006468~protein phosphorylation;GO:0007275~multicellular organism development;GO:0035023~regulation of Rho protein sigl transduction;GO:0036309~protein localization to M-band;GO:0043065~positive regulation of apoptotic process;GO:0043547~positive regulation of GTPase activity;GO:0045214~sarcomere organization;GO:0051056~regulation of small GTPase mediated sigl transduction
>sp|Q9HB14|KCNKD_HUMAN Potassium channel subfamily K member 13 OS=Homo sapiens OX=9606 GN=KCNK13 PE=2 SV=2S(7);Y(30)	Q9HB14	KCNK13	S(7);Y(30)	_________MAGRGFSWGPGHLNEDRFLL;EDRFLLLAALIVLYLLGGAAVFSALELAH	Peptide10001		-1.17333	-0.459329	-0.623124	-0.795268	-0.902158		0						-0.261649	-0.36578	-0.325375	-1.02898	-1.35637									0.304936	0.576684		0.243241	0.741535		-0.194636	0.746727		-0.411774	0.503337		0	0.402998	0	0		GO:0030322~stabilization of membrane potential;GO:0034765~regulation of ion transmembrane transport;GO:0071805~potassium ion transmembrane transport
>sp|Q9NP98|MYOZ1_HUMAN Myozenin-1 OS=Homo sapiens OX=9606 GN=MYOZ1 PE=1 SV=1S(167)	Q9NP98	MYOZ1	S(167)	GRGGAAGTAGVGETGSGDQAGGEGKHITVFK	Peptide10002		-0.426909	-0.0684464	0.0159394	-0.275404	0.000854011		0	-0.2625	-0.122588	-0.287838	0.00710993		0.0529282	-0.437093	-0.127988	0.0915982	-0.0583644		0.0010608	-0.0493994	-0.14305	-0.358294	0.0805991			-0.11113	0.614031		-0.0011916	0.996901		-0.114254	0.622226		0.10078	0.701772		0	0	0	0		GO:0030239~myofibril assembly
>sp|Q9NP98|MYOZ1_HUMAN Myozenin-1 OS=Homo sapiens OX=9606 GN=MYOZ1 PE=1 SV=1T(159)	Q9NP98	MYOZ1	T(159)	TGGPAGQAGRGGAAGTAGVGETGSGDQAGGE	Peptide10003		-1.14237	0.896037	0.978199	-1.61666	0.956793		0	-0.044172	0.151297	-0.0375242	0.611547		-0.50545	0.0725719	1.37005	-0.488447	0.0538915		-0.240858	0.433876	0.754106	-0.950932	0.628892			0.811749	0.132364		1.28558	0.0301445		-0.30122	0.636962		1.03495	0.0879412		0	0.60997	0	0		GO:0030239~myofibril assembly
>sp|Q9NP98|MYOZ1_HUMAN Myozenin-1 OS=Homo sapiens OX=9606 GN=MYOZ1 PE=1 SV=1T(165)	Q9NP98	MYOZ1	T(165)	QAGRGGAAGTAGVGETGSGDQAGGEGKHITV	Peptide10004		-1.32151	0.83681	1.09062	-1.71193	1.47719		0	-0.447895	0.421895	0.463434	0.81299		-0.55156	0.353332	1.56094	-0.492809	0.588009		0.230663	0.36291	0.718515	-0.509752	0.738095			0.68689	0.317487		1.35859	0.0625252		-0.152163	0.858918		1.31467	0.077815		0	0.631715	0	0		GO:0030239~myofibril assembly
>sp|O95365|ZBT7A_HUMAN Zinc finger and BTB domain-containing protein 7A OS=Homo sapiens OX=9606 GN=ZBTB7A PE=1 SV=1S(526)	O95365	ZBTB7A	S(526)	SPGATATPGAPAQPSSPDARRNGQEKHFKDE	Peptide10005		-0.092887	-0.312681	0.187649	-0.0339428	-0.472129		0	-0.19982	0.121983	-0.11649	-0.453735		0.0201899	0.0556082	-0.0803387	-0.360604	-0.175715		0.0883001	-0.0964693	-0.215073	-0.180087	-0.244679			-0.142241	0.465491		-0.000345591	0.999148		-0.176682	0.381868		-0.340465	0.094013		0	0	0	0.538206		D-templated;GO:0000122~negative regulation of transcription from R polymerase II promoter;GO:0006351~transcription;GO:0007275~multicellular organism development;GO:0030154~cell differentiation;GO:0045892~negative regulation of transcription
>sp|Q14324|MYPC2_HUMAN Myosin-binding protein C; fast-type OS=Homo sapiens OX=9606 GN=MYBPC2 PE=1 SV=2T(883)	Q14324	MYBPC2	T(883)	PRPQVVWTKGGAPLDTSRVHVRTSDFDTVFF	Peptide10006		-0.274279	0.0684264	0.416681	0.187582	0.409465		0	-0.00405986	0.36388	0.285334	0.315403		0.0347254	0.0322609	0.29808	0.494531	0.286567		0.0309968	0.0530512	0.441234	0.174178	0.377514			0.0895589	0.577647		0.432108	0.00926093		0.337546	0.0414465		0.399376	0.0175571		0	0.441046	0	0		GO:0006936~muscle contraction;GO:0007155~cell adhesion;GO:0030049~muscle filament sliding
>tr||H9KVB4|H9KVB4_HUMAN >tr|inucleotide repeat-containing gene 18 protein OS=Homo sapiens OX=9606 GN=TNRC18 PE=1 SV=1T(2146)	H9KVB4	TNRC18	T(2146)	EDEHLPRGGAVERPLTPAPRSCIIDKDELKD	Peptide10007		-1.02858	-0.872701	-0.451603	-0.504002	-0.645595		0						-0.503692	-0.745308	-0.458266	-0.528044	-0.692615									-0.0428705	0.914331		0.3112	0.42314		0.250111	0.476184		0.0970294	0.82525		0	0	0.512177	0
>sp|Q14526|HIC1_HUMAN Hypermethylated in cancer 1 protein OS=Homo sapiens OX=9606 GN=HIC1 PE=1 SV=5S(366)	Q14526	HIC1	S(366)	SPSERCEERGGDAAVSPGGPPLGLAPPPRYP	Peptide10008		-1.03908	-0.884624	-0.84827	-1.4868	-1.05443		0						-0.767082	-0.819008	-0.426406	-1.43401	-1.05158									0.0512662	0.892431		0.265744	0.493463		-0.557322	0.12399		-0.149925	0.701828		0	0.615345	0	0		D-templated;GO:0000122~negative regulation of transcription from R polymerase II promoter;GO:0006351~transcription;GO:0006355~regulation of transcription;GO:0007275~multicellular organism development;GO:0008630~intrinsic apoptotic sigling pathway in response to D damage;GO:0016055~Wnt sigling pathway;GO:0030178~negative regulation of Wnt sigling pathway;GO:0043517~positive regulation of D damage …
>sp|O75533|SF3B1_HUMAN Splicing factor 3B subunit 1 OS=Homo sapiens OX=9606 GN=SF3B1 PE=1 SV=3T(326)	O75533	SF3B1	T(326)	AETPRTDRGGDSIGETPTPGASKRKSRWDET	Peptide10009		-1.2968	-0.846041	-1.01316	-1.24568	-0.71823		0						-0.813611	-0.662539	-0.719568	-1.0126	-0.676682									0.300917	0.403686		0.188842	0.694924		-0.0739356	0.861461		0.357751	0.385934		0	0	0.48943	0		epigenetic;GO:0000245~spliceosomal complex assembly;GO:0000375~R splicing;GO:0000398~mR splicing;GO:0045815~positive regulation of gene expression;via spliceosome;via transesterification reactions
>sp|Q6PJT7|ZC3HE_HUMAN Zinc finger CCCH domain-containing protein 14 OS=Homo sapiens OX=9606 GN=ZC3H14 PE=1 SV=1S(515)	Q6PJT7	ZC3H14	S(515)	HLMQTRDLVQPDKPASPKFIVTLDGVPSPPG	Peptide1001		0.0292124	-0.117634	-0.0475867	-0.163484	-0.179631		0	-0.152191	-0.164379	-0.247932	-0.0746448		0.0679985	-0.100361	-0.0487739	-0.225348	-0.228706		0.0274342	0.0492731	-0.0547362	-0.136769	-0.286605			-0.111389	0.380682		-0.11003	0.476831		-0.224545	0.0944376		-0.223558	0.0983705		0	0	0	0.709083		GO:0006397~mR processing;GO:0043488~regulation of mR stability;GO:1900364~negative regulation of mR polyadenylation
>sp|E9PAV3|CAM_HUMAN scent polypeptide-associated complex subunit alpha; muscle-specific form OS=Homo sapiens OX=9606 GN=CA PE=1 SV=1T(1303)	E9PAV3	CA	T(1303)	NPAVVTPPSPKGGPATSPPKGAPTPPAATPP	Peptide10010		-0.29164	-0.410645	-0.960284	-1.23711	-1.08086		0						0.0385093	-0.587982	-1.077	-0.941051	-0.753891									-0.372748	0.271213		-0.892079	0.0343347		-0.962514	0.0327095		-0.790811	0.0606113		0	0	0	0.553172		D-templated;GO:0003231~cardiac ventricle development;GO:0006351~transcription;GO:0006355~regulation of transcription;GO:0006412~translation;GO:0010664~negative regulation of striated muscle cell apoptotic process;GO:0015031~protein transport;GO:0016032~viral process;GO:0043403~skeletal muscle tissue regeneration;GO:0048633~positive regulation of skeletal muscle tissue growth;GO:0048742~regulation…
>tr||A0A0G2JIW1|A0A0G2JIW1_HUMAN Heat shock 70 kDa protein 1B OS=Homo sapiens OX=9606 GN=HSPA1B PE=1 SV=1S(634)	A0A0G2JIW1	HSPA1B	S(634)	GPGGFGAQGPKGGSGSGPTIEEVD_______	Peptide10011		-0.596356	0.217961	0.108303	-0.148697	-0.327233		0	0.0386206	-0.0343501	-0.0647376	-0.390907		-0.201943	0.308108	0.13528	-0.338221	-0.157902		-0.0625748	0.316371	-0.0700983	-0.223571	-0.244929			0.435483	0.0225636		0.250002	0.25646		0.0214117	0.932694		-0.0650247	0.814736		0	0	0.380677	0
>sp|Q14526|HIC1_HUMAN Hypermethylated in cancer 1 protein OS=Homo sapiens OX=9606 GN=HIC1 PE=1 SV=5S(313)	Q14526	HIC1	S(313)	EEAAPPSDPFRGGSGSPGPEPPGRPDGPSLL	Peptide10012		-0.286582	0.230449	-0.0120239	-0.224845	0.381983		0	-0.137951	0.0645236	-0.27047	0.374387		0.088311	-0.200198	0.212859	0.131253	-0.0175386		0.0573577	0.36664	0.00491815	-0.122605	0.145526			0.0999635	0.701937		0.102798	0.765668		-0.0864381	0.75512		0.256318	0.330418		0	0.416017	0	0		D-templated;GO:0000122~negative regulation of transcription from R polymerase II promoter;GO:0006351~transcription;GO:0006355~regulation of transcription;GO:0007275~multicellular organism development;GO:0008630~intrinsic apoptotic sigling pathway in response to D damage;GO:0016055~Wnt sigling pathway;GO:0030178~negative regulation of Wnt sigling pathway;GO:0043517~positive regulation of D damage …
>sp|P51608|MECP2_HUMAN Methyl-CpG-binding protein 2 OS=Homo sapiens OX=9606 GN=MECP2 PE=1 SV=1S(423)	P51608	MECP2	S(423)	LSSSVCKEEKMPRGGSLESDGCPKEPAKTQP	Peptide10013		-0.699558	0.221628	-0.142224	-0.170461	0.308265		0	-0.0508186	-0.0713941	0.336882	-0.0702012		-0.36364	-0.270472	0.085036	0.188032	0.207308		-0.329829	-0.0572685	-0.217963	-0.422074	0.63129			0.309024	0.302779		0.261621	0.485912		0.331352	0.305005		0.617422	0.060583		0	0	0.592974	0		D-templated;GO:0000122~negative regulation of transcription from R polymerase II promoter;GO:0001662~behavioral fear response;GO:0001666~response to hypoxia;GO:0001964~startle response;GO:0001976~neurological system process involved in regulation of systemic arterial blood pressure;GO:0002087~regulation of respiratory gaseous exchange by neurological system process;GO:0006020~inositol metabolic p…
>sp|Q9NP98|MYOZ1_HUMAN Myozenin-1 OS=Homo sapiens OX=9606 GN=MYOZ1 PE=1 SV=1S(121)	Q9NP98	MYOZ1	S(121)	SYSKSNGRGGSQAGGSGSAGQYGSDQQHHLG	Peptide10014		-0.0226273	0.409032	0.484474	0.430101	-0.279243		0	0.364929	0.0801577	0.119813	0.249193		0.0392974	-0.369465	0.212694	0.105555	0.169837		-0.464144	0.108793	-0.319611	0.404928	0.470551			0.240191	0.488707		0.226297	0.610773		0.376968	0.292008		0.264453	0.50409		0	0	0.616233	0		GO:0030239~myofibril assembly
>sp|Q9NP98|MYOZ1_HUMAN Myozenin-1 OS=Homo sapiens OX=9606 GN=MYOZ1 PE=1 SV=1S(116)	Q9NP98	MYOZ1	S(116)	AGQGFSYSKSNGRGGSQAGGSGSAGQYGSDQ	Peptide10015		-0.0507926	0.835487	0.440461	0.115866	0.0123291		0	0.535212	0.198573	0.250531	0.284674		-0.13533	-0.131285	0.564469	0.0986921	0.244103		-0.336781	0.349685	-0.0117537	0.35076	0.389407			0.528001	0.0499729		0.428663	0.163147		0.334688	0.269982		0.363354	0.246031		0	0	0.51829	0		GO:0030239~myofibril assembly
>sp|Q9NP98|MYOZ1_HUMAN Myozenin-1 OS=Homo sapiens OX=9606 GN=MYOZ1 PE=1 SV=1S(137)	Q9NP98	MYOZ1	S(137)	GSAGQYGSDQQHHLGSGSGAGGTGGPAGQAG	Peptide10016		0.0271166	0.66038	0.39272	0.357775	-0.312753		0	0.390533	0.172153	0.180315	0.203964		-0.0460266	-0.630129	0.458979	0.247121	-0.0505371		-0.583939	-0.0607706	-0.264873	0.641343	0.357275			0.240716	0.574429		0.340457	0.497123		0.507351	0.241509		0.2002	0.697371		0	0	0.514243	0		GO:0030239~myofibril assembly
>sp|Q9NP98|MYOZ1_HUMAN Myozenin-1 OS=Homo sapiens OX=9606 GN=MYOZ1 PE=1 SV=1S(129)	Q9NP98	MYOZ1	S(129)	GGSQAGGSGSAGQYGSDQQHHLGSGSGAGGT	Peptide10017		-0.108373	0.364867	-0.0659206	-0.664121	-0.111876		0	0.100186	-0.109646	-0.156273	-0.197138		-0.373502	0.196113	0.313528	-0.801623	0.0265728		-0.0681912	-0.113074	-0.0356356	-0.201744	-0.217951			0.27454	0.266246		0.163098	0.627234		-0.318424	0.240236		0.0124188	0.975427		0	0.366028	0	0		GO:0030239~myofibril assembly
>sp|Q9NP98|MYOZ1_HUMAN Myozenin-1 OS=Homo sapiens OX=9606 GN=MYOZ1 PE=1 SV=1S(139)	Q9NP98	MYOZ1	S(139)	AGQYGSDQQHHLGSGSGAGGTGGPAGQAGRG	Peptide10018		0.0736063	0.580319	0.141019	0.0532692	-0.115155		0	0.329863	0.054214	0.357545	0.0993838		0.184889	-0.13674	0.017037	0.00245653	0.050827		-0.58219	-0.154242	-0.165847	0.638253	0.238861			0.235724	0.469537		0.0925293	0.856882		0.343804	0.307302		0.149403	0.714869		0	0	0.519427	0		GO:0030239~myofibril assembly
>sp|Q9NP98|MYOZ1_HUMAN Myozenin-1 OS=Homo sapiens OX=9606 GN=MYOZ1 PE=1 SV=1S(123)	Q9NP98	MYOZ1	S(123)	SKSNGRGGSQAGGSGSAGQYGSDQQHHLGSG	Peptide10019		-1.58089	-0.361196	-0.52868	-1.18782	-0.96786		0						-0.982708	-1.23073	0.0852786	-1.09057	-0.49975									0.485834	0.437206		1.0601	0.135204		0.142603	0.844153		0.547992	0.441839		0	0.715924	0	0		GO:0030239~myofibril assembly
>sp|P68032|ACTC_HUMAN Actin; alpha cardiac muscle 1 OS=Homo sapiens OX=9606 GN=ACTC1 PE=1 SV=1S(302)	P68032	ACTC1	S(302)	CDIDIRKDLYANNVLSGGTTMYPGIADRMQK	Peptide1002		-0.932334	-1.12573	-0.944891	-1.02277	-0.796543		0						-0.52105	-0.998388	-0.574451	-1.02736	-0.777352									-0.335369	0.314518		-0.0329794	0.954398		-0.298375	0.401644		-0.0602554	0.899009		0	0.698984	0	0		GO:0006915~apoptotic process;GO:0010628~positive regulation of gene expression;GO:0030048~actin filament-based movement;GO:0030049~muscle filament sliding;GO:0030240~skeletal muscle thin filament assembly;GO:0031032~actomyosin structure organization;GO:0033275~actin-myosin filament sliding;GO:0042493~response to drug;GO:0043066~negative regulation of apoptotic process;GO:0045471~response to ethan…
>sp|P02671|FIBA_HUMAN Fibrinogen alpha chain OS=Homo sapiens OX=9606 GN=FGA PE=1 SV=2S(274)	P02671	FGA	S(274)	MELERPGGNEITRGGSTSYGTGSETESPRNP	Peptide10020		-1.6758	0.603026	2.006	0.240206	1.4231		0	0.241032	1.21545	1.46292	0.218964		-1.92775	0.988299	3.64523	2.6583	-2.20367		1.06713	2.33963	1.04476	-1.55482	1.07633			1.6771	0.274436		2.61197	0.118712		1.33576	0.426835		0.762788	0.703637		0	0.477334	0	0		common pathway;fibrin clot formation;GO:0002250~adaptive immune response;GO:0002576~platelet degranulation;GO:0006461~protein complex assembly;GO:0007160~cell-matrix adhesion;GO:0007165~sigl transduction;GO:0007596~blood coagulation;GO:0030168~platelet activation;GO:0030198~extracellular matrix organization;GO:0031639~plasminogen activation;GO:0034116~positive regulation of heterotypic cell-cell …
>sp|Q9NTI5|PDS5B_HUMAN Sister chromatid cohesion protein PDS5 homolog B OS=Homo sapiens OX=9606 GN=PDS5B PE=1 SV=1S(1257)	Q9NTI5	PDS5B	S(1257)	KPKGSQRSRKRGHTASESDEQQWPEEKRLKE	Peptide10021		-0.327819	0.695773	0.0700334	-0.363402	-0.00406197		0	0.427873	-0.0420113	0.106146	-0.108812		-0.243579	0.204708	0.104942	-0.0772535	0.152762		-0.0555547	0.181057	-0.19008	-0.118484	0.185579			0.534091	0.0113276		0.142459	0.622437		0.0434897	0.872069		0.213105	0.396968		0	0	0.427967	0		GO:0006281~D repair;GO:0007062~sister chromatid cohesion;GO:0007064~mitotic sister chromatid cohesion;GO:0008283~cell proliferation;GO:0008285~negative regulation of cell proliferation;GO:0042127~regulation of cell proliferation;GO:0051301~cell division
>sp|Q86VF7|NRAP_HUMAN Nebulin-related-anchoring protein OS=Homo sapiens OX=9606 GN=NRAP PE=1 SV=2S(1429)	Q86VF7	NRAP	S(1429)	SDLIGMKGIGWLALRSPQMESAKKAGELISE	Peptide10022		-0.563631	-0.615667	-0.631663	-1.16897	-0.490097		0						-0.360135	-0.56834	-0.0616074	-1.1557	-0.857547									-0.130121	0.760754		0.115248	0.845512		-0.700454	0.112528		-0.211939	0.646729		0	0.409517	0	0
>sp|P20929|NEBU_HUMAN Nebulin OS=Homo sapiens OX=9606 GN=NEB PE=1 SV=5S(3887)	P20929	NEB	S(3887)	ADLEWLRGIGWMPQGSPEVLRVKQNIFCD	Peptide10023		-0.0098938	-0.0509962	-0.0854696	-0.246115	0.371561		0	-0.303481	0.00644959	0.17823	0.133351		0.0762608	-0.0957457	0.229552	-0.149102	-0.0219811		-0.125729	0.237802	0.233715	-0.19545	0.00745916			-0.0382648	0.887673		0.110902	0.714095		-0.0882688	0.72959		0.137438	0.603478		0	0	0	0		GO:0007517~muscle organ development;GO:0007525~somatic muscle development;GO:0030049~muscle filament sliding;GO:0030832~regulation of actin filament length
>sp|P20929|NEBU_HUMAN Nebulin OS=Homo sapiens OX=9606 GN=NEB PE=1 SV=5S(2425)	P20929	NEB	S(2425)	NLYKSDLEWLRGIGWSPLGSLEAEKNKRASE	Peptide10024		0.0216761	-0.120906	0.0037901	0.158692	0.136659		0	-0.142618	-0.0289915	0.0843671	0.153832		0.124232	0.0032131	0.0859036	0.0271402	-0.0743467		-0.0979602	0.274872	0.127491	0.0210722	-0.0143984			-0.00834665	0.968381		0.0350613	0.902735		0.0608308	0.752089		0.0384496	0.87072		0	0	0	0		GO:0007517~muscle organ development;GO:0007525~somatic muscle development;GO:0030049~muscle filament sliding;GO:0030832~regulation of actin filament length
>sp|Q8WZ42|TITIN_HUMAN Titin OS=Homo sapiens OX=9606 GN=TTN PE=1 SV=4S(34266)	Q8WZ42	TTN	S(34266)	IRGIPPKIEALPSDISIDEGKVLTVACAFTG	Peptide10025		-0.772334	-0.571699	0.0796621	0.287679	-0.0986724		0	-0.477713	-0.304171	-0.241728	0.0457794		-0.415366	-0.126317	0.0441137	-0.0405508	0.124938		0.204281	-0.129489	-0.173275	-0.220903	0.0398389			-0.0804496	0.823552		0.157437	0.711744		0.191979	0.573746		0.273826	0.439316		0	0	0.45686	0		GO:0002576~platelet degranulation;GO:0003300~cardiac muscle hypertrophy;GO:0006936~muscle contraction;GO:0006941~striated muscle contraction;GO:0007076~mitotic chromosome condensation;GO:0018108~peptidyl-tyrosine phosphorylation;GO:0030049~muscle filament sliding;GO:0030240~skeletal muscle thin filament assembly;GO:0030241~skeletal muscle myosin thick filament assembly;GO:0035995~detection of mus…
>sp|A4UGR9|XIRP2_HUMAN Xin actin-binding repeat-containing protein 2 OS=Homo sapiens OX=9606 GN=XIRP2 PE=1 SV=2S(868)	A4UGR9	XIRP2	S(868)	QFDESIHKFQIIRGISAQEIQTGNVKSAKWL	Peptide10026		-0.589271	-0.759749	0.320834	-1.58721	-0.08467		0	-1.07109	-0.525033	-0.1855	-0.573824		-1.15882	-0.668131	0.955307	-1.72848	0.427467		0.258221	-0.545931	0.513246	-1.85958	-0.420002			-0.388757	0.561422		0.688557	0.344529		-0.967724	0.152579		0.209711	0.812474		0	0.35103	0	0		GO:0003281~ventricular septum development;GO:0007507~heart development;GO:0030036~actin cytoskeleton organization;GO:0045216~cell-cell junction organization;GO:0055008~cardiac muscle tissue morphogenesis
>sp|A4UGR9|XIRP2_HUMAN Xin actin-binding repeat-containing protein 2 OS=Homo sapiens OX=9606 GN=XIRP2 PE=1 SV=2S(621)	A4UGR9	XIRP2	S(621)	TINKDITEIKVVRGISMEENVKGGVSKAKWL	Peptide10027		-0.690532	-1.58583	-0.451656	-1.50065	-1.04783		0	-1.72402	-0.932071	-0.328492	-1.45458		-0.695483	-1.50687	0.105529	-2.31702	-0.915236		-1.33987	-1.64091	-0.0650875	-1.90649	-0.676207			-0.932938	0.0921625		0.345649	0.662415		-0.831691	0.179224		-0.341993	0.630893		0	0.317209	0	0		GO:0003281~ventricular septum development;GO:0007507~heart development;GO:0030036~actin cytoskeleton organization;GO:0045216~cell-cell junction organization;GO:0055008~cardiac muscle tissue morphogenesis
>sp|P35609|ACTN2_HUMAN Alpha-actinin-2 OS=Homo sapiens OX=9606 GN=ACTN2 PE=1 SV=1T(751)	P35609	ACTN2	T(751)	NEVETQILTRDAKGITQEQMNEFRASFNHFD	Peptide10028		0.228649	0.329168	-0.0222996	-0.175084	0.0855985		0	0.21992	0.0451711	-0.116763	0.154209		0.173207	0.0800165	0.0192645	-0.304454	0.155014		-0.133253	0.328895	-0.0452732	-0.0372739	0.0721057			0.172349	0.256067		-0.0679351	0.766709		-0.225544	0.173886		0.0495809	0.818521		0	0	0	0.366715		GO:0000165~MAPK cascade;GO:0002576~platelet degranulation;GO:0007155~cell adhesion;GO:0030035~microspike assembly;GO:0030049~muscle filament sliding;GO:0042391~regulation of membrane potential;GO:0042981~regulation of apoptotic process;GO:0043267~negative regulation of potassium ion transport;GO:0043268~positive regulation of potassium ion transport;GO:0043547~positive regulation of GTPase activi…
>sp|P12883|MYH7_HUMAN Myosin-7 OS=Homo sapiens OX=9606 GN=MYH7 PE=1 SV=5T(1307)	P12883	MYH7	T(1307)	DEKEALISQLTRGKLTYTQQLEDLKRQLEEE	Peptide10029		-0.657619	-0.451927	-0.257551	-0.261806	-0.629638		0	1.67048e-05	-1.09809	-0.916573	-0.254216		-0.605724	-0.169037	-0.526712	-0.412153	-0.45727		-0.0121888	-0.248192	-0.759398	-1.08536	-0.00774499			0.101598	0.814211		-0.341555	0.439957		-0.350089	0.373198		-0.0183341	0.97497		0	0	0.358932	0		GO:0002026~regulation of the force of heart contraction;GO:0002027~regulation of heart rate;GO:0003009~skeletal muscle contraction;GO:0006936~muscle contraction;GO:0006941~striated muscle contraction;GO:0007512~adult heart development;GO:0014728~regulation of the force of skeletal muscle contraction;GO:0014883~transition between fast and slow fiber;GO:0014898~cardiac muscle hypertrophy in respons…
>sp|Q562R1|ACTBL_HUMAN Beta-actin-like protein 2 OS=Homo sapiens OX=9606 GN=ACTBL2 PE=1 SV=2S(301)	Q562R1	ACTBL2	S(301)	CDVDIRKDLYANTVLSGGSTMYPGIADRMQK	Peptide1003		-0.730729	-0.71859	-0.932211	-0.79064	-0.189297		0						-0.412147	-0.849124	-0.481119	-0.567169	-0.47911									-0.212419	0.580336		-0.135227	0.805828		-0.107467	0.803074		0.237234	0.59261		0	0	0.484449	0
>sp|P12883|MYH7_HUMAN Myosin-7 OS=Homo sapiens OX=9606 GN=MYH7 PE=1 SV=5Y(1308)	P12883	MYH7	Y(1308)	EKEALISQLTRGKLTYTQQLEDLKRQLEEEV	Peptide10030		0.701291	0.845493	-0.314085	-0.320898	-0.838174		0	0.892568	-0.0253536	-0.531982	-0.466102		-0.123912	0.379376	0.0127139	-0.611999	-0.679276		-0.195176	-0.212079	-0.366492	0.444115	-0.661509			0.380789	0.380004		-0.268855	0.642278		-0.350741	0.449539		-0.756816	0.1015		0	0	0	0.423869		GO:0002026~regulation of the force of heart contraction;GO:0002027~regulation of heart rate;GO:0003009~skeletal muscle contraction;GO:0006936~muscle contraction;GO:0006941~striated muscle contraction;GO:0007512~adult heart development;GO:0014728~regulation of the force of skeletal muscle contraction;GO:0014883~transition between fast and slow fiber;GO:0014898~cardiac muscle hypertrophy in respons…
>sp|P12883|MYH7_HUMAN Myosin-7 OS=Homo sapiens OX=9606 GN=MYH7 PE=1 SV=5T(1309)	P12883	MYH7	T(1309)	KEALISQLTRGKLTYTQQLEDLKRQLEEEVK	Peptide10031		-0.627972	0.0863844	-0.186853	0.269907	-0.753394		0	-0.00605128	-0.86587	-0.711231	-0.109036		-0.260995	-0.0994592	-0.00757334	-0.296618	-0.46879		-0.0722419	0.625988	-0.148584	-0.115304	-0.828862			0.392018	0.316435		-0.0619179	0.933515		0.0269907	0.957608		-0.299718	0.520049		0	0	0.353551	0		GO:0002026~regulation of the force of heart contraction;GO:0002027~regulation of heart rate;GO:0003009~skeletal muscle contraction;GO:0006936~muscle contraction;GO:0006941~striated muscle contraction;GO:0007512~adult heart development;GO:0014728~regulation of the force of skeletal muscle contraction;GO:0014883~transition between fast and slow fiber;GO:0014898~cardiac muscle hypertrophy in respons…
>sp|Q8WZ42|TITIN_HUMAN Titin OS=Homo sapiens OX=9606 GN=TTN PE=1 SV=4S(20940)	Q8WZ42	TTN	S(20940)	SNFRLKIPIKGKPAPSVSWKKGEDPLATDTR	Peptide10032		0.431221	0.336318	0.0523514	-0.0709907	-0.0277471		0	0.245472	0.0128056	0.23939	0.0188205		-0.168189	-0.103845	0.324504	0.188534	-0.143792		0.113808	-0.0821042	0.0395829	0.278673	-0.128059			0.00475045	0.986305		0.0131011	0.975241		0.0646919	0.811909		-0.164404	0.539836		0	0	0	0.425209		GO:0002576~platelet degranulation;GO:0003300~cardiac muscle hypertrophy;GO:0006936~muscle contraction;GO:0006941~striated muscle contraction;GO:0007076~mitotic chromosome condensation;GO:0018108~peptidyl-tyrosine phosphorylation;GO:0030049~muscle filament sliding;GO:0030240~skeletal muscle thin filament assembly;GO:0030241~skeletal muscle myosin thick filament assembly;GO:0035995~detection of mus…
>sp|Q8WZ42|TITIN_HUMAN Titin OS=Homo sapiens OX=9606 GN=TTN PE=1 SV=4S(25669)	Q8WZ42	TTN	S(25669)	LEADIRGKPIPDVVWSKDGKELEETAARMEI	Peptide10033		0.0522367	-0.656217	0.320875	0.182115	0.115849		0	-0.482048	-0.11492	-0.0329732	0.325738		0.388385	-0.368018	-0.151534	0.130364	-0.131546		-0.0833112	0.0735042	-0.0425144	-0.189073	0.230891			-0.447522	0.0772045		-0.0863509	0.841967		-0.0667191	0.838201		0.0459055	0.908986		0.646268	0	0	0		GO:0002576~platelet degranulation;GO:0003300~cardiac muscle hypertrophy;GO:0006936~muscle contraction;GO:0006941~striated muscle contraction;GO:0007076~mitotic chromosome condensation;GO:0018108~peptidyl-tyrosine phosphorylation;GO:0030049~muscle filament sliding;GO:0030240~skeletal muscle thin filament assembly;GO:0030241~skeletal muscle myosin thick filament assembly;GO:0035995~detection of mus…
>sp|Q9Y623|MYH4_HUMAN Myosin-4 OS=Homo sapiens OX=9606 GN=MYH4 PE=2 SV=2T(1313)	Q9Y623	MYH4	T(1313)	KDAMVSQLSRGKQAFTQQIEELKRQLEEETK	Peptide10034		0.106337	-0.396958	0.0181738	-0.139358	0.209059		0	-0.458183	0.196468	0.69056	-0.239449		-0.0999969	-0.112587	0.0266541	0.147583	0.114538		0.187065	-0.683624	0.0200498	0.185892	0.0735441			-0.461189	0.0601011		0.0169853	0.972723		0.172818	0.547336		-0.00892821	0.982984		0.626791	0	0	0		GO:0006936~muscle contraction;GO:0014823~response to activity;GO:0030048~actin filament-based movement;GO:0030049~muscle filament sliding;GO:0046034~ATP metabolic process
>sp|P20929|NEBU_HUMAN Nebulin OS=Homo sapiens OX=9606 GN=NEB PE=1 SV=5T(254)	P20929	NEB	T(254)	DVAYKKGLAEQQAQFTPLADPPDIEFAKKVT	Peptide10035		0.0190323	-0.139031	0.343009	-0.380597	0.682808		0	-0.275376	0.181822	-0.00441739	0.461826		0.0791391	-0.0329221	0.479881	0.026898	0.082742		0.207748	0.495757	0.460957	-0.572443	0.269668			-0.064373	0.85202		0.289937	0.383036		-0.30912	0.307289		0.297781	0.355944		0	0	0	0.284604		GO:0007517~muscle organ development;GO:0007525~somatic muscle development;GO:0030049~muscle filament sliding;GO:0030832~regulation of actin filament length
>sp|P20929|NEBU_HUMAN Nebulin OS=Homo sapiens OX=9606 GN=NEB PE=1 SV=5S(2182)	P20929	NEB	S(2182)	EYKQDYNEWYKGLGWSPAGSLEVEKAKKATE	Peptide10036		0.0186016	-0.151192	-0.00521411	0.132498	0.101664		0	-0.192351	-0.062795	0.0831438	0.115232		0.0659189	-0.0490032	0.120708	0.0501405	-0.0889288		-0.0181696	0.206487	0.169694	0.0340263	-0.118368			-0.0631024	0.727305		0.0390105	0.885625		0.0583644	0.7563		-0.0141879	0.955275		0	0	0	0		GO:0007517~muscle organ development;GO:0007525~somatic muscle development;GO:0030049~muscle filament sliding;GO:0030832~regulation of actin filament length
>sp|Q8WZ42|TITIN_HUMAN Titin OS=Homo sapiens OX=9606 GN=TTN PE=1 SV=4Y(20919)	Q8WZ42	TTN	Y(20919)	VVAPDLDLKGLPDLCYLAKENSNFRLKIPIK	Peptide10037		-0.321984	-0.636533	-0.727576	-0.852198	-0.810438		0						-0.605333	-0.844061	-0.231248	-0.741129	-0.681744									-0.276639	0.44392		-0.0157533	0.979825		-0.333005	0.381397		-0.282432	0.494734		0	0.529765	0	0		GO:0002576~platelet degranulation;GO:0003300~cardiac muscle hypertrophy;GO:0006936~muscle contraction;GO:0006941~striated muscle contraction;GO:0007076~mitotic chromosome condensation;GO:0018108~peptidyl-tyrosine phosphorylation;GO:0030049~muscle filament sliding;GO:0030240~skeletal muscle thin filament assembly;GO:0030241~skeletal muscle myosin thick filament assembly;GO:0035995~detection of mus…
>sp|Q8WZ42|TITIN_HUMAN Titin OS=Homo sapiens OX=9606 GN=TTN PE=1 SV=4T(28480)	Q8WZ42	TTN	T(28480)	KNEKGLSDPVTIGPITVKELIITPEVDLSDI	Peptide10038		0.229163	0.265856	0.0346066	0.101984	-0.0724577		0	0.282187	0.0955538	0.0653816	-0.0694775		-0.150465	0.0684629	0.284033	0.195379	-0.0887233		0.154641	0.229577	0.199386	0.0464964	-0.187459			0.153186	0.323124		0.09506	0.652213		0.0439753	0.815412		-0.162864	0.357108		0	0	0	0.356399		GO:0002576~platelet degranulation;GO:0003300~cardiac muscle hypertrophy;GO:0006936~muscle contraction;GO:0006941~striated muscle contraction;GO:0007076~mitotic chromosome condensation;GO:0018108~peptidyl-tyrosine phosphorylation;GO:0030049~muscle filament sliding;GO:0030240~skeletal muscle thin filament assembly;GO:0030241~skeletal muscle myosin thick filament assembly;GO:0035995~detection of mus…
>sp|Q8WZ42|TITIN_HUMAN Titin OS=Homo sapiens OX=9606 GN=TTN PE=1 SV=4T(28475)	Q8WZ42	TTN	T(28475)	FRVFAKNEKGLSDPVTIGPITVKELIITPEV	Peptide10039		0.131485	0.0427543	0.221676	0.134862	-0.0824832		0	0.19833	0.0463695	0.0937074	-0.0180316		-0.168903	0.0527723	0.232531	0.100123	0.00606062		0.0644484	0.0800219	0.162428	-0.0616332	0.0187904			0.0867119	0.556845		0.158993	0.317487		0.0600071	0.714893		-0.0256736	0.901823		0	0	0	0		GO:0002576~platelet degranulation;GO:0003300~cardiac muscle hypertrophy;GO:0006936~muscle contraction;GO:0006941~striated muscle contraction;GO:0007076~mitotic chromosome condensation;GO:0018108~peptidyl-tyrosine phosphorylation;GO:0030049~muscle filament sliding;GO:0030240~skeletal muscle thin filament assembly;GO:0030241~skeletal muscle myosin thick filament assembly;GO:0035995~detection of mus…
>tr||A0A2R8Y793|A0A2R8Y793_HUMAN Actin; cytoplasmic 1 (Fragment) OS=Homo sapiens OX=9606 GN=ACTB PE=1 SV=1S(284)	A0A2R8Y793	ACTB	S(284)	CDVDIRKDLYANTVLSGGTTMYPGIADRMQK	Peptide1004		0.283722	0.326633	0.120437	0.0708743	-0.0103147		0	0.334728	0.00523945	0.0671057	0.063038		0.21949	0.0611623	-0.0761918	0.384027	0.0220254		0.220201	0.466903	0.0972349	0.0281835	-0.105367			0.116503	0.524275		-0.144173	0.510388		-0.0433057	0.839963		-0.188508	0.341617		0	0	0	0.488499
>sp|P11532|DMD_HUMAN Dys>tr|ophin OS=Homo sapiens OX=9606 GN=DMD PE=1 SV=3T(3548)	P11532	DMD	T(3548)	HKGLSPLPSPPEMMPTSPQSPRDAELIAEAK	Peptide10040		-0.908199	-0.247529	-0.156013	-1.07672	-0.590723		0						-0.7105	-0.525903	0.396034	-1.0712	-0.472983									0.422634	0.241887		0.929361	0.038208		-0.264606	0.500849		0.277497	0.5146		0	0.653135	0	0		D-templated;GO:0001954~positive regulation of cell-matrix adhesion;GO:0002027~regulation of heart rate;GO:0006355~regulation of transcription;GO:0007010~cytoskeleton organization;GO:0007517~muscle organ development;GO:0007519~skeletal muscle tissue development;GO:0007568~aging;GO:0008065~establishment of blood-nerve barrier;GO:0010880~regulation of release of sequestered calcium ion into cytosol …
>sp|Q08043|ACTN3_HUMAN Alpha-actinin-3 OS=Homo sapiens OX=9606 GN=ACTN3 PE=1 SV=2S(758)	Q08043	ACTN3	S(758)	NEVENQVLTRDAKGLSQEQLNEFRASFNHFD	Peptide10041		-0.130493	-0.336627	-0.580511	-1.61975	-0.103821		0						-0.647913	-1.44346	-0.139347	-0.983468	0.185048									-0.500842	0.470508		0.0292736	0.980485		-0.912405	0.228622		0.429816	0.599226		0	0.318443	0	0		GO:0006936~muscle contraction;GO:0014728~regulation of the force of skeletal muscle contraction;GO:0014732~skeletal muscle atrophy;GO:0014883~transition between fast and slow fiber;GO:0014894~response to denervation involved in regulation of muscle adaptation;GO:0030049~muscle filament sliding;GO:0031448~positive regulation of fast-twitch skeletal muscle fiber contraction;GO:0042981~regulation of…
>sp|O00160|MYO1F_HUMAN Unconventiol myosin-If OS=Homo sapiens OX=9606 GN=MYO1F PE=1 SV=3T(977)	O00160	MYO1F	T(977)	ARGGPLPLEIMSGGGTHRPPRGPPSTSLGAS	Peptide10042		-0.582488	-0.397316	-0.292302	-1.19725	-0.567877		0						-0.614424	-0.784257	-0.278342	-0.761256	-0.447482									0.00766939	0.985371		0.313134	0.450646		-0.380799	0.303596		0.0907762	0.846394		0	0.686451	0	0
>sp|Q8WZ42|TITIN_HUMAN Titin OS=Homo sapiens OX=9606 GN=TTN PE=1 SV=4S(30358)	Q8WZ42	TTN	S(30358)	RVAAVNVKGMSEYSESIAEIEPVERIEIPDL	Peptide10043		-0.197746	0.199308	0.118266	-0.150461	0.207118		0	0.0440518	0.175782	0.308586	-0.0610162		-0.0655903	0.3968	0.130634	-0.120475	0.240107		0.0962516	0.215937	0.0498839	-0.0178616	0.10884			0.255795	0.151092		0.160413	0.485912		0.0467184	0.837352		0.165533	0.444012		0	0.454932	0	0		GO:0002576~platelet degranulation;GO:0003300~cardiac muscle hypertrophy;GO:0006936~muscle contraction;GO:0006941~striated muscle contraction;GO:0007076~mitotic chromosome condensation;GO:0018108~peptidyl-tyrosine phosphorylation;GO:0030049~muscle filament sliding;GO:0030240~skeletal muscle thin filament assembly;GO:0030241~skeletal muscle myosin thick filament assembly;GO:0035995~detection of mus…
>tr||E9PK54|E9PK54_HUMAN Heat shock cogte 71 kDa protein (Fragment) OS=Homo sapiens OX=9606 GN=HSPA8 PE=1 SV=8T(14)	E9PK54	HSPA8	T(14)	__MSKGPAVGIDLGTTYSCVGVFQHGKVEII	Peptide10044		-0.596324	-0.778829	-0.713523	-0.929703	-0.965123		0						-0.378117	-0.678748	-0.53233	-1.10555	-0.956116									-0.241568	0.37348		-0.135706	0.711627		-0.530408	0.0944641		-0.473399	0.131361		0	0.368684	0	0
>sp|Q5VTT5|MYOM3_HUMAN Myomesin-3 OS=Homo sapiens OX=9606 GN=MYOM3 PE=1 SV=1T(601)	Q5VTT5	MYOM3	T(601)	PSEPSEPIALRGPPATLPPPAQVQAFRDTQT	Peptide10045		-0.0585331	0.278882	-0.217321	-0.0106372	-0.0600524		0	0.183804	-0.0440694	-0.337657	0.108758		0.185692	0.269584	-0.220054	-0.403335	0.180327		-0.157767	0.214665	-0.124162	0.210053	-0.0984787			0.244386	0.215048		-0.14375	0.590828		-0.127742	0.575869		0.0402904	0.893632		0	0	0.28819	0
>sp|Q7Z406|MYH14_HUMAN Myosin-14 OS=Homo sapiens OX=9606 GN=MYH14 PE=1 SV=2S(45)	Q7Z406	MYH14	S(45)	TPRGPSAGGGPGSGTSPQVEWTARRLVWVPS	Peptide10046		-0.87134	-1.23875	-0.10474	-1.33501	-0.411584		0						-0.591894	-0.139071	-0.55646	-1.10285	-0.00986788									0.0427072	0.955566		0.401017	0.615904		-0.487315	0.458108		0.520891	0.466997		0	0.63389	0	0		GO:0003009~skeletal muscle contraction;GO:0007519~skeletal muscle tissue development;GO:0007605~sensory perception of sound;GO:0008360~regulation of cell shape;GO:0019228~neurol action potential;GO:0030048~actin filament-based movement;GO:0031032~actomyosin structure organization;GO:0070584~mitochondrion morphogenesis;GO:0071625~vocalization behavior
>sp|Q9H7N4|SFR19_HUMAN Splicing factor; arginine/serine-rich 19 OS=Homo sapiens OX=9606 GN=SCAF1 PE=1 SV=3S(725)	Q9H7N4	SCAF1	S(725)	LDKSDPRGPSPAPASSPKREVLYDSEGLSGE	Peptide10047		-0.741749	-0.291846	0.301014	-0.443836	-0.504631		0	-0.0147378	-0.0869472	-0.644726	-0.459737		-0.129631	0.273319	-0.52893	-0.51147	0.0867521		0.175901	-0.370602	-0.444033	-0.72958	0.12456			0.0729031	0.872672		-0.0158544	0.980607		-0.408533	0.297309		-0.0143939	0.981002		0	0.338419	0	0		GO:0006366~transcription from R polymerase II promoter;GO:0006397~mR processing;GO:0008380~R splicing
>sp|O14497|ARI1A_HUMAN AT-rich interactive domain-containing protein 1A OS=Homo sapiens OX=9606 GN=ARID1A PE=1 SV=3S(696)	O14497	ARID1A	S(696)	FSPHTSPHLPGIRGPSPSPVGSPASVAQSRS	Peptide10048		-1.71712	-0.300872	-0.498313	-1.40783	-0.707353		0						-0.694537	-0.782619	-0.509415	-1.34958	0.404396									0.664083	0.364951		0.701964	0.41886		-0.172878	0.840458		1.05435	0.20509		0	0.630665	0	0		D-templated;GO:0000122~negative regulation of transcription from R polymerase II promoter;GO:0001843~neural tube closure;GO:0003205~cardiac chamber development;GO:0003408~optic cup formation involved in camera-type eye development;GO:0006337~nucleosome disassembly;GO:0006338~chromatin remodeling;GO:0006344~maintence of chromatin silencing;GO:0006351~transcription;GO:0006357~regulation of transcri…
>sp|Q8WZ42|TITIN_HUMAN Titin OS=Homo sapiens OX=9606 GN=TTN PE=1 SV=4S(9803)	Q8WZ42	TTN	S(9803)	DAIVTWYKGPTELTESQKYNFRNDGRCHYMT	Peptide10049		0.338863	-0.0567175	0.309112	0.137853	0.412225		0	0.138831	0.0975994	0.138003	0.467718		0.171802	0.285623	0.241587	0.243174	-0.0766207		0.0254799	0.354429	0.406543	0.0166452	0.213303			0.0465053	0.857671		0.129674	0.651143		-0.000117526	0.999553		0.12012	0.646729		0	0	0	0		GO:0002576~platelet degranulation;GO:0003300~cardiac muscle hypertrophy;GO:0006936~muscle contraction;GO:0006941~striated muscle contraction;GO:0007076~mitotic chromosome condensation;GO:0018108~peptidyl-tyrosine phosphorylation;GO:0030049~muscle filament sliding;GO:0030240~skeletal muscle thin filament assembly;GO:0030241~skeletal muscle myosin thick filament assembly;GO:0035995~detection of mus…
>tr||A0A2R8Y793|A0A2R8Y793_HUMAN Actin; cytoplasmic 1 (Fragment) OS=Homo sapiens OX=9606 GN=ACTB PE=1 SV=1S(284);T(287)	A0A2R8Y793	ACTB	S(284);T(287)	CDVDIRKDLYANTVLSGGTTMYPGIADRMQK;DIRKDLYANTVLSGGTTMYPGIADRMQKEIT	Peptide1005		-0.906616	-0.64188	-0.932137	-0.876279	-0.811026		0						-0.511718	-0.92143	-0.427549	-0.83159	-0.277825									-0.0724879	0.892242		0.0293243	0.971609		-0.144767	0.778479		0.164741	0.781992		0	0.553098	0	0
>sp|Q9H987|SYP2L_HUMAN Syptopodin 2-like protein OS=Homo sapiens OX=9606 GN=SYNPO2L PE=2 SV=3S(197)	Q9H987	SYNPO2L	S(197)	AEPAPTIPGPPSQGDSRVSSPSWEDGAALQP	Peptide10050		1.48321	1.69745	1.67279	1.66614	1.40492		0	2.11205	1.51638	1.46615	1.6676		1.17705	1.8409	0.819154	2.25947	0.941794		0.534652	2.6063	1.52476	1.56286	1.05652			1.26544	0.00890318		0.584544	0.293693		0.939929	0.0768973		0.468982	0.416405		0	0	0	0.285333		GO:0032233~positive regulation of actin filament bundle assembly
>sp|Q9H987|SYP2L_HUMAN Syptopodin 2-like protein OS=Homo sapiens OX=9606 GN=SYNPO2L PE=2 SV=3Y(176)	Q9H987	SYNPO2L	Y(176)	GPTRPTPPGAPPDEVYLSDSPAEPAPTIPGP	Peptide10051		-1.08592	-1.04729	-0.738033	-0.951491	-0.53903		0						-0.387785	-0.849195	-0.406778	-1.0154	-0.539168									-0.211392	0.625709		0.164444	0.786016		-0.246598	0.587882		0.197751	0.701716		0	0.717299	0	0		GO:0032233~positive regulation of actin filament bundle assembly
>sp|Q9H987|SYP2L_HUMAN Syptopodin 2-like protein OS=Homo sapiens OX=9606 GN=SYNPO2L PE=2 SV=3S(193)	Q9H987	SYNPO2L	S(193)	SDSPAEPAPTIPGPPSQGDSRVSSPSWEDGA	Peptide10052		-0.182206	-0.0752033	0.113536	-0.164369	-0.272623		0	-0.227926	-0.490732	-0.155314	0.0551497		0.0471512	-0.245537	-0.0551184	-0.313026	-0.295952		-0.136295	0.175028	-0.396228	-0.110294	-0.158711			-0.0255721	0.930153		-0.139298	0.642278		-0.117913	0.642928		-0.100197	0.732156		0	0	0	0		GO:0032233~positive regulation of actin filament bundle assembly
>sp|Q9P266|JCAD_HUMAN Junctiol protein associated with corory artery disease OS=Homo sapiens OX=9606 GN=JCAD PE=1 SV=3S(1304)	Q9P266	JCAD	S(1304)	KATTRGQAGLPGGLVSPGSGDRAQRLGHSLS	Peptide10053		-1.02746	-1.36506	-0.256476	-1.32605	-1.0674		0						-0.662347	-1.53124	-0.285494	-1.07539	-0.838646									-0.603247	0.0688824		0.573917	0.121589		-0.355818	0.303367		-0.10812	0.802893		0	0.482388	0	0		GO:0007155~cell adhesion
>sp|Q8WZ42|TITIN_HUMAN Titin OS=Homo sapiens OX=9606 GN=TTN PE=1 SV=4S(34143)	Q8WZ42	TTN	S(34143)	SGKYTIKAKNFRGQCSATASLMVLPLVEEPS	Peptide10054		-1.08352	-0.636288	-0.583862	-1.01825	-0.788247		0						-0.896486	-0.779746	0.0735683	-1.10643	-0.801811									0.281984	0.466039		0.734854	0.0978812		-0.0723377	0.873636		0.194972	0.675797		0	0.687852	0	0		GO:0002576~platelet degranulation;GO:0003300~cardiac muscle hypertrophy;GO:0006936~muscle contraction;GO:0006941~striated muscle contraction;GO:0007076~mitotic chromosome condensation;GO:0018108~peptidyl-tyrosine phosphorylation;GO:0030049~muscle filament sliding;GO:0030240~skeletal muscle thin filament assembly;GO:0030241~skeletal muscle myosin thick filament assembly;GO:0035995~detection of mus…
>sp|P18206|VINC_HUMAN Vinculin OS=Homo sapiens OX=9606 GN=VCL PE=1 SV=4S(346)	P18206	VCL	S(346)	MTDQVADLRARGQGSSPVAMQKAQQVSQGLD	Peptide10055		-0.22067	-0.451291	-0.373706	0.272683	0.168065		0	-0.452299	0.226603	-0.50716	0.110934		0.0857084	-0.263627	0.133203	-0.0580887	-0.468166		-0.241775	0.262938	-0.177926	-0.322446	0.146871			-0.131886	0.729173		0.0462275	0.942764		-0.0595691	0.886905		0.0836099	0.862962		0	0	0	0		GO:0002009~morphogenesis of an epithelium;GO:0002576~platelet degranulation;GO:0006928~movement of cell or subcellular component;GO:0006936~muscle contraction;GO:0007155~cell adhesion;GO:0007160~cell-matrix adhesion;GO:0030032~lamellipodium assembly;GO:0030334~regulation of cell migration;GO:0030336~negative regulation of cell migration;GO:0034333~adherens junction assembly;GO:0034394~protein loc…
>sp|P12883|MYH7_HUMAN Myosin-7 OS=Homo sapiens OX=9606 GN=MYH7 PE=1 SV=5Y(422)	P12883	MYH7	Y(422)	GNEYVTKGQNVQQVIYATGALAKAVYERMFN	Peptide10056		-0.500803	0.105335	-0.0109877	-0.0891151	-0.167672		0	-0.0250743	-0.339094	-0.502265	0.126379		-0.0226316	0.0468263	-0.0312044	-0.256566	-0.211705		-0.137006	0.29651	-0.118616	-0.133105	-0.163971			0.271009	0.195776		0.0401348	0.920555		-0.0801526	0.754946		0.0608682	0.841871		0	0	0.399944	0		GO:0002026~regulation of the force of heart contraction;GO:0002027~regulation of heart rate;GO:0003009~skeletal muscle contraction;GO:0006936~muscle contraction;GO:0006941~striated muscle contraction;GO:0007512~adult heart development;GO:0014728~regulation of the force of skeletal muscle contraction;GO:0014883~transition between fast and slow fiber;GO:0014898~cardiac muscle hypertrophy in respons…
>sp|Q8WZ42|TITIN_HUMAN Titin OS=Homo sapiens OX=9606 GN=TTN PE=1 SV=4S(12720)	Q8WZ42	TTN	S(12720)	DVHGQWKLKGQPLTASPDCEIIEDGKKHILI	Peptide10057		-0.844145	-1.33882	-0.805279	-1.15245	-0.956014		0						-0.917565	-0.594176	-0.419504	-0.836667	-1.09399									-0.0856418	0.87522		0.268464	0.658406		-0.113703	0.832821		-0.144147	0.814338		0	0.564998	0	0		GO:0002576~platelet degranulation;GO:0003300~cardiac muscle hypertrophy;GO:0006936~muscle contraction;GO:0006941~striated muscle contraction;GO:0007076~mitotic chromosome condensation;GO:0018108~peptidyl-tyrosine phosphorylation;GO:0030049~muscle filament sliding;GO:0030240~skeletal muscle thin filament assembly;GO:0030241~skeletal muscle myosin thick filament assembly;GO:0035995~detection of mus…
>sp|Q9UKX2|MYH2_HUMAN Myosin-2 OS=Homo sapiens OX=9606 GN=MYH2 PE=1 SV=1S(424)	Q9UKX2	MYH2	S(424)	VGNEYVTKGQTVEQVSVGALAKAVYEKMF	Peptide10058		0.145696	-0.362468	0.00207278	-0.212662	-0.111036		0	-0.284103	0.0986524	0.273638	-0.389704		-0.134518	-0.282572	-0.0771406	0.0165186	-0.0736107		0.145739	-0.578108	-0.222325	-0.210657	0.0597607			-0.416042	0.040316		-0.0889141	0.780057		-0.0725196	0.775157		-0.167876	0.503381		0.664187	0	0	0		GO:0001778~plasma membrane repair;GO:0006936~muscle contraction;GO:0014823~response to activity;GO:0030049~muscle filament sliding;GO:0038096~Fc-gamma receptor sigling pathway involved in phagocytosis
>sp|Q9Y623|MYH4_HUMAN Myosin-4 OS=Homo sapiens OX=9606 GN=MYH4 PE=2 SV=2T(419)	Q9Y623	MYH4	T(419)	YPRVKVGNEFVTKGQTVQQVYVGALAKAI	Peptide10059		1.2764	0.486525	0.323127	-0.284995	0.403599		0	0.434952	0.317479	-0.102629	0.633332		0.488386	-0.225711	0.711101	-0.0743302	-0.222374		-0.270791	0.682051	0.883497	-0.0481929	-0.0895269			-0.0290433	0.961542		0.185304	0.794716		-0.501034	0.316643		-0.19224	0.760585		0	0	0	0.660935		GO:0006936~muscle contraction;GO:0014823~response to activity;GO:0030048~actin filament-based movement;GO:0030049~muscle filament sliding;GO:0046034~ATP metabolic process
>sp|Q5SV97|PERM1_HUMAN PGC-1 and ERR-induced regulator in muscle protein 1 OS=Homo sapiens OX=9606 GN=PERM1 PE=2 SV=4S(316)	Q5SV97	PERM1	S(316)	STPASEPQPDRDMAVSTPASEPQSDRDMAVS	Peptide1006		-0.874699	-0.521755	-0.997335	-0.78756	-0.388338		0						-0.366092	-0.230494	-0.371721	-1.17249	-0.43541									0.244271	0.61763		-0.0641325	0.940936		-0.359627	0.475969		0.208522	0.72659		0	0.451912	0	0		D-templated;GO:0006351~transcription;GO:0006355~regulation of transcription;GO:0014850~response to muscle activity
>sp|Q9Y623|MYH4_HUMAN Myosin-4 OS=Homo sapiens OX=9606 GN=MYH4 PE=2 SV=2Y(424)	Q9Y623	MYH4	Y(424)	VGNEFVTKGQTVQQVYVGALAKAIYEKMF	Peptide10060		0.714117	0.375671	0.327929	0.00118677	0.364626		0	0.409675	0.378532	-0.132634	0.530306		0.587955	-0.0320695	0.203085	0.180303	0.191946		-0.0908964	0.696	0.621626	-0.0366453	0.144375			0.0595251	0.873045		0.0799989	0.87358		-0.299742	0.351271		0.00501927	0.992451		0	0	0	0.629473		GO:0006936~muscle contraction;GO:0014823~response to activity;GO:0030048~actin filament-based movement;GO:0030049~muscle filament sliding;GO:0046034~ATP metabolic process
>sp|Q8WZ42|TITIN_HUMAN Titin OS=Homo sapiens OX=9606 GN=TTN PE=1 SV=4S(33531)	Q8WZ42	TTN	S(33531)	VPTVTWLRKGQVLSTSARHQVTTTKYKSTFE	Peptide10061		-0.343746	-0.331541	0.0282248	-0.162744	-0.24997		0	-0.403865	-0.0966328	-0.27351	-0.192479		-0.259915	-0.393228	0.0475285	-0.172251	-0.082791		0.172082	-0.405446	-0.278225	-0.205523	-0.110015			-0.275626	0.104605		0.0331187	0.920307		-0.0956121	0.635213		-0.0509189	0.83714		0.442742	0	0	0		GO:0002576~platelet degranulation;GO:0003300~cardiac muscle hypertrophy;GO:0006936~muscle contraction;GO:0006941~striated muscle contraction;GO:0007076~mitotic chromosome condensation;GO:0018108~peptidyl-tyrosine phosphorylation;GO:0030049~muscle filament sliding;GO:0030240~skeletal muscle thin filament assembly;GO:0030241~skeletal muscle myosin thick filament assembly;GO:0035995~detection of mus…
>sp|A4UGR9|XIRP2_HUMAN Xin actin-binding repeat-containing protein 2 OS=Homo sapiens OX=9606 GN=XIRP2 PE=1 SV=2S(3059)	A4UGR9	XIRP2	S(3059)	ATLRRQIKIETRGRDSPPTITIPVNINHAAS	Peptide10062		-0.602591	-0.645509	-0.360803	-0.942852	-0.621453		0						-0.42052	-0.838253	-0.267246	-0.72066	-0.179467									-0.230325	0.498495		0.197531	0.656649		-0.320201	0.371638		0.111096	0.805262		0	0.638125	0	0		GO:0003281~ventricular septum development;GO:0007507~heart development;GO:0030036~actin cytoskeleton organization;GO:0045216~cell-cell junction organization;GO:0055008~cardiac muscle tissue morphogenesis
>sp|Q9UIF9|BAZ2A_HUMAN Bromodomain adjacent to zinc finger domain protein 2A OS=Homo sapiens OX=9606 GN=BAZ2A PE=1 SV=4S(1770)	Q9UIF9	BAZ2A	S(1770)	EGDGRRRRVLLRGRESPAAGPRYSEEGLSPS	Peptide10063		-0.549198	-0.394828	-1.7289	0.387393	0.674692		0	-0.624496	0.00213283	-0.394773	-0.0579555		0.15497	0.113795	-0.647284	0.209577	-0.00436548		-0.0867714	0.227081	0.0145721	-0.0679027	-0.214225			-0.0493621	0.944662		-0.46962	0.486408		0.153823	0.815555		0.219786	0.766962		0	0	0.309654	0		D-templated;GO:0000183~chromatin silencing at rD;GO:0006306~D methylation;GO:0006338~chromatin remodeling;GO:0006351~transcription;GO:0006355~regulation of transcription;GO:0016575~histone deacetylation
>sp|Q8WZ42|TITIN_HUMAN Titin OS=Homo sapiens OX=9606 GN=TTN PE=1 SV=4T(18868)	Q8WZ42	TTN	T(18868)	IRILARVKGRPEPDITWTKEGKVLVREKRVD	Peptide10064		0.0267341	-0.0610713	0.31454	0.068096	0.184014		0	-0.0585951	-0.0596962	0.518739	0.123517		0.0892498	0.263887	0.0671521	0.184265	-0.00671202		0.0716842	0.174125	0.0847773	0.164147	0.0879933			0.0326693	0.887552		0.0547762	0.854375		0.186895	0.342198		0.0502859	0.847379		0	0	0	0		GO:0002576~platelet degranulation;GO:0003300~cardiac muscle hypertrophy;GO:0006936~muscle contraction;GO:0006941~striated muscle contraction;GO:0007076~mitotic chromosome condensation;GO:0018108~peptidyl-tyrosine phosphorylation;GO:0030049~muscle filament sliding;GO:0030240~skeletal muscle thin filament assembly;GO:0030241~skeletal muscle myosin thick filament assembly;GO:0035995~detection of mus…
>tr||A0A0A0MT49|A0A0A0MT49_HUMAN >tr|anscription activator BRG1 OS=Homo sapiens OX=9606 GN=SMARCA4 PE=1 SV=1S(1486)	A0A0A0MT49	SMARCA4	S(1486)	SKKQKKRGRPPAEKLSPNPPNLTKKMKKIVD	Peptide10065		0.116847	0.259181	0.257739	0.0618969	0.217992		0	0.248355	-0.00166165	-0.0554287	0.41905		0.22569	0.170146	0.037041	0.273871	0.053293		0.123627	0.424829	0.108082	0.142841	0.121561			0.159087	0.35115		-0.0162409	0.958383		-0.0107459	0.961223		0.086433	0.688955		0	0	0	0
>sp|Q8WZ42|TITIN_HUMAN Titin OS=Homo sapiens OX=9606 GN=TTN PE=1 SV=4T(28231)	Q8WZ42	TTN	T(28231)	VQVLIPFKGRPPPTVTWRKDEKNLGSDARYS	Peptide10066		-0.405839	-0.704847	-1.13259	-1.0171	-0.739534		0						-0.708603	-0.841791	-0.0426628	-0.971195	-1.09629									-0.216098	0.729515		-0.0304041	0.976044		-0.436928	0.475846		-0.360693	0.597594		0	0.512167	0	0		GO:0002576~platelet degranulation;GO:0003300~cardiac muscle hypertrophy;GO:0006936~muscle contraction;GO:0006941~striated muscle contraction;GO:0007076~mitotic chromosome condensation;GO:0018108~peptidyl-tyrosine phosphorylation;GO:0030049~muscle filament sliding;GO:0030240~skeletal muscle thin filament assembly;GO:0030241~skeletal muscle myosin thick filament assembly;GO:0035995~detection of mus…
>sp|Q8WZ42|TITIN_HUMAN Titin OS=Homo sapiens OX=9606 GN=TTN PE=1 SV=4T(26352)	Q8WZ42	TTN	T(26352)	EQLKIDVPFKGRPQATVNWRKDGQTLKETTR	Peptide10067		0.572988	0.548213	-0.0381707	-0.266796	-0.119407		0	0.54579	0.159434	0.25347	-0.274146		-0.441867	-0.118578	0.410057	0.283926	-0.234321		0.166821	-0.32773	0.00807935	0.0405154	-0.0467843			0.0874381	0.840364		0.0603643	0.928523		0.00329333	0.993161		-0.24315	0.57712		0	0	0	0.424199		GO:0002576~platelet degranulation;GO:0003300~cardiac muscle hypertrophy;GO:0006936~muscle contraction;GO:0006941~striated muscle contraction;GO:0007076~mitotic chromosome condensation;GO:0018108~peptidyl-tyrosine phosphorylation;GO:0030049~muscle filament sliding;GO:0030240~skeletal muscle thin filament assembly;GO:0030241~skeletal muscle myosin thick filament assembly;GO:0035995~detection of mus…
>sp|Q9BY89|K1671_HUMAN Uncharacterized protein KIAA1671 OS=Homo sapiens OX=9606 GN=KIAA1671 PE=1 SV=2S(1441)	Q9BY89	KIAA1671	S(1441)	HEARERRREQPKGRPSLTGENLEAKMGPCWW	Peptide10068		-0.839299	-0.965652	-0.518261	-1.40365	-0.666306		0						-0.332751	-0.991565	-0.594573	-0.951044	-0.488564									-0.392583	0.30056		0.0296084	0.966111		-0.59132	0.168771		0.00859074	0.989468		0	0.519511	0	0
>sp|Q8WZ42|TITIN_HUMAN Titin OS=Homo sapiens OX=9606 GN=TTN PE=1 SV=4T(24980)	Q8WZ42	TTN	T(24980)	AGGSARIHIPFKGRPTPEITWSREEGEFTDK	Peptide10069		-0.614465	-0.179961	-0.0244296	0.106669	0.0700869		0	-0.306728	0.215716	0.18328	-0.188667		-0.0627017	0.271453	0.0283624	-0.0607096	0.00553522		-0.129756	-0.162001	0.102882	0.157693	0.0131684			0.107421	0.670341		0.282363	0.271217		0.298464	0.226681		0.176762	0.516188		0	0	0.516464	0		GO:0002576~platelet degranulation;GO:0003300~cardiac muscle hypertrophy;GO:0006936~muscle contraction;GO:0006941~striated muscle contraction;GO:0007076~mitotic chromosome condensation;GO:0018108~peptidyl-tyrosine phosphorylation;GO:0030049~muscle filament sliding;GO:0030240~skeletal muscle thin filament assembly;GO:0030241~skeletal muscle myosin thick filament assembly;GO:0035995~detection of mus…
>sp|P27816|MAP4_HUMAN Microtubule-associated protein 4 OS=Homo sapiens OX=9606 GN=MAP4 PE=1 SV=3S(280)	P27816	MAP4	S(280)	ALATKTEVALAKDMESPTKLDVTLAKDMQPS	Peptide1007		-0.0843389	-0.0124432	0.0997735	-0.490831	1.20705		0	-0.0396037	0.20721	0.354573	0.596652		0.256346	0.0499859	-0.00246607	0.213362	0.712105		-0.287119	0.151173	0.839043	-0.720801	0.921704			0.0660559	0.888172		0.314668	0.502127		-0.132146	0.769122		0.888157	0.0315856		0	0.364767	0	0		GO:0007052~mitotic spindle organization;GO:0031175~neuron projection development;GO:0051012~microtubule sliding;GO:0051294~establishment of spindle orientation;GO:0051301~cell division;GO:1902856~negative regulation of nonmotile primary cilium assembly
>sp|Q8WZ42|TITIN_HUMAN Titin OS=Homo sapiens OX=9606 GN=TTN PE=1 SV=4T(23898)	Q8WZ42	TTN	T(23898)	AGGSLRLFVPIKGRPTPEVKWGKVDGEIRDA	Peptide10070		-0.731448	-0.168659	-0.46272	-0.313203	-0.541438		0	-0.278256	-0.116759	-0.0867962	-0.818492		-0.346459	-0.56986	-0.447669	-0.379893	0.112578		-0.544189	-1.16172	-0.263748	-0.265413	0.00349335			-0.1391	0.744933		0.0828	0.899597		0.144198	0.74381		0.0945593	0.859615		0	0	0.51211	0		GO:0002576~platelet degranulation;GO:0003300~cardiac muscle hypertrophy;GO:0006936~muscle contraction;GO:0006941~striated muscle contraction;GO:0007076~mitotic chromosome condensation;GO:0018108~peptidyl-tyrosine phosphorylation;GO:0030049~muscle filament sliding;GO:0030240~skeletal muscle thin filament assembly;GO:0030241~skeletal muscle myosin thick filament assembly;GO:0035995~detection of mus…
>sp|Q8WZ42|TITIN_HUMAN Titin OS=Homo sapiens OX=9606 GN=TTN PE=1 SV=4T(16766)	Q8WZ42	TTN	T(16766)	AGSQIRIPAVIKGRPTPKSSWEFDGKAKKAM	Peptide10071		-2.51875	-1.74879	-0.354573	-0.753849	0.289874		0						-1.00521	-0.841228	-0.42581	-0.27794	0.239344									0.466976	0.589283		1.37179	0.152651		1.24609	0.181479		2.02659	0.0520316		0	0	0.523891	0		GO:0002576~platelet degranulation;GO:0003300~cardiac muscle hypertrophy;GO:0006936~muscle contraction;GO:0006941~striated muscle contraction;GO:0007076~mitotic chromosome condensation;GO:0018108~peptidyl-tyrosine phosphorylation;GO:0030049~muscle filament sliding;GO:0030240~skeletal muscle thin filament assembly;GO:0030241~skeletal muscle myosin thick filament assembly;GO:0035995~detection of mus…
>sp|O94812|BAIP3_HUMAN BAI1-associated protein 3 OS=Homo sapiens OX=9606 GN=BAIAP3 PE=1 SV=2S(405);S(411)	O94812	BAIAP3	S(405);S(411)	QRDTAMSQRGRSGFLSHLLLLSHLLRLEHSA;SQRGRSGFLSHLLLLSHLLRLEHSAEEPNSS	Peptide10072		-0.422127	-0.279291	-0.57248	-1.69379	-0.669485		0						-0.543293	-0.928583	-0.284926	-1.32124	-0.157431									-0.121227	0.822726		0.0540073	0.948552		-1.02481	0.0728218		0.0692518	0.921111		0	0.369469	0	0		GO:0007186~G-protein coupled receptor sigling pathway;GO:0007269~neurotransmitter secretion
>sp|Q8WZ42|TITIN_HUMAN Titin OS=Homo sapiens OX=9606 GN=TTN PE=1 SV=4T(29525)	Q8WZ42	TTN	T(29525)	EMRQKGSDFWVEAGHTKQLTFTVERLVEKTE	Peptide10073		0.0105377	-0.00182287	0.312414	-0.124849	-0.0642208		0	-0.0637597	0.156972	-0.0810419	0.0309826		0.059858	-0.0798079	0.214473	-0.146978	0.0196142		0.0193032	0.0113478	0.171267	-0.0192234	-0.0658857			-0.0559354	0.659872		0.191357	0.125309		-0.115448	0.35535		-0.0423022	0.795579		0	0	0	0.362707		GO:0002576~platelet degranulation;GO:0003300~cardiac muscle hypertrophy;GO:0006936~muscle contraction;GO:0006941~striated muscle contraction;GO:0007076~mitotic chromosome condensation;GO:0018108~peptidyl-tyrosine phosphorylation;GO:0030049~muscle filament sliding;GO:0030240~skeletal muscle thin filament assembly;GO:0030241~skeletal muscle myosin thick filament assembly;GO:0035995~detection of mus…
>sp|Q8WZ42|TITIN_HUMAN Titin OS=Homo sapiens OX=9606 GN=TTN PE=1 SV=4T(23024)	Q8WZ42	TTN	T(23024)	GYIVEMQTKGSDKWATCATVKVTEATITGLI	Peptide10074		0.670616	0.389298	-0.197861	-0.22972	-0.119959		0	0.196223	0.0711362	0.187414	-0.0190756		-0.195894	-0.170018	0.303539	-0.314108	-0.285885		-0.162729	-0.489803	-0.529705	0.56795	0.00597649			-0.0965732	0.842126		-0.166221	0.782459		-0.0251143	0.961547		-0.182734	0.728364		0	0	0	0.451304		GO:0002576~platelet degranulation;GO:0003300~cardiac muscle hypertrophy;GO:0006936~muscle contraction;GO:0006941~striated muscle contraction;GO:0007076~mitotic chromosome condensation;GO:0018108~peptidyl-tyrosine phosphorylation;GO:0030049~muscle filament sliding;GO:0030240~skeletal muscle thin filament assembly;GO:0030241~skeletal muscle myosin thick filament assembly;GO:0035995~detection of mus…
>sp|Q8WZ42|TITIN_HUMAN Titin OS=Homo sapiens OX=9606 GN=TTN PE=1 SV=4S(23019)	Q8WZ42	TTN	S(23019)	GSRILGYIVEMQTKGSDKWATCATVKVTEAT	Peptide10075		0.0856502	0.00537828	-0.0667622	-0.156957	-0.0776815		0	-0.306949	0.146154	0.448374	-0.166277		-0.235952	-0.250788	0.344236	-0.342115	-0.324251		-0.321615	-0.643088	-0.584108	0.500303	0.152908			-0.180882	0.63751		0.0778594	0.901935		0.230381	0.562361		0.0141541	0.980874		0.326476	0	0	0		GO:0002576~platelet degranulation;GO:0003300~cardiac muscle hypertrophy;GO:0006936~muscle contraction;GO:0006941~striated muscle contraction;GO:0007076~mitotic chromosome condensation;GO:0018108~peptidyl-tyrosine phosphorylation;GO:0030049~muscle filament sliding;GO:0030240~skeletal muscle thin filament assembly;GO:0030241~skeletal muscle myosin thick filament assembly;GO:0035995~detection of mus…
>sp|Q8WZ42|TITIN_HUMAN Titin OS=Homo sapiens OX=9606 GN=TTN PE=1 SV=4T(21942)	Q8WZ42	TTN	T(21942)	VIEAQRKGSDQWTHITTVKGLECVVRNLTEG	Peptide10076		0.404051	0.0837711	-0.0892834	-0.332071	-0.138409		0	0.203358	-0.175052	-0.24104	-0.00547094		-0.21154	0.121453	0.12929	-0.314402	-0.385819		0.0196226	-0.316701	-0.107205	0.00602287	-0.178827			-0.0300632	0.920849		-0.113596	0.735417		-0.273406	0.27523		-0.230165	0.392839		0	0	0	0.61596		GO:0002576~platelet degranulation;GO:0003300~cardiac muscle hypertrophy;GO:0006936~muscle contraction;GO:0006941~striated muscle contraction;GO:0007076~mitotic chromosome condensation;GO:0018108~peptidyl-tyrosine phosphorylation;GO:0030049~muscle filament sliding;GO:0030240~skeletal muscle thin filament assembly;GO:0030241~skeletal muscle myosin thick filament assembly;GO:0035995~detection of mus…
>sp|Q8WZ42|TITIN_HUMAN Titin OS=Homo sapiens OX=9606 GN=TTN PE=1 SV=4S(26270)	Q8WZ42	TTN	S(26270)	TGYVVEMQTKGSEKWSTCTQVKTLEATISGL	Peptide10077		-0.479328	-0.223219	-0.043146	0.108939	0.0350201		0	-0.465548	0.041515	0.355749	-0.10182		0.0135038	-0.136835	0.00731824	-0.174484	-0.115378		-0.410841	-0.150554	-0.409346	0.159342	0.274819			-0.0248728	0.939139		0.118251	0.742521		0.331553	0.215461		0.242326	0.400563		0	0	0.493916	0		GO:0002576~platelet degranulation;GO:0003300~cardiac muscle hypertrophy;GO:0006936~muscle contraction;GO:0006941~striated muscle contraction;GO:0007076~mitotic chromosome condensation;GO:0018108~peptidyl-tyrosine phosphorylation;GO:0030049~muscle filament sliding;GO:0030240~skeletal muscle thin filament assembly;GO:0030241~skeletal muscle myosin thick filament assembly;GO:0035995~detection of mus…
>sp|Q8WZ42|TITIN_HUMAN Titin OS=Homo sapiens OX=9606 GN=TTN PE=1 SV=4S(26266)	Q8WZ42	TTN	S(26266)	GSKITGYVVEMQTKGSEKWSTCTQVKTLEAT	Peptide10078		0.622193	0.430722	0.0236885	-0.0946104	-0.217028		0	0.381268	0.277823	0.231178	-0.208143		0.0691989	0.0513126	0.206477	-0.198549	-0.145498		-0.205863	-0.0661923	-0.00692562	0.322092	-0.127166			0.0778952	0.807495		0.00388359	0.993947		-0.0563547	0.867208		-0.295841	0.337947		0	0	0	0.494779		GO:0002576~platelet degranulation;GO:0003300~cardiac muscle hypertrophy;GO:0006936~muscle contraction;GO:0006941~striated muscle contraction;GO:0007076~mitotic chromosome condensation;GO:0018108~peptidyl-tyrosine phosphorylation;GO:0030049~muscle filament sliding;GO:0030240~skeletal muscle thin filament assembly;GO:0030241~skeletal muscle myosin thick filament assembly;GO:0035995~detection of mus…
>sp|D6RIA3|CD054_HUMAN Uncharacterized protein C4orf54 OS=Homo sapiens OX=9606 GN=C4orf54 PE=2 SV=1S(1707)	D6RIA3	C4orf54	S(1707)	LQPTPIARAPRGSELSPMVAEPSSKEAAATF	Peptide10079		-0.470244	-0.0203633	0.319215	-1.24547	0.326854		0	-0.364797	-0.159038	-0.601531	0.128459		-0.363539	-0.197031	0.213096	-0.83439	0.901179		0.713542	-0.00612924	0.16124	-1.11137	0.0142076			-0.11702	0.797151		0.163689	0.780057		-0.918132	0.033185		0.372735	0.412107		0	0	0	0.305845		GO:0045149~acetoin metabolic process
>sp|Q8IUG5|MY18B_HUMAN Unconventiol myosin-XVIIIb OS=Homo sapiens OX=9606 GN=MYO18B PE=1 SV=2S(2377)	Q8IUG5	MYO18B	S(2377)	GRKLSSPTTPRDMLLSPTLRPRRRCLESSVD	Peptide1008		-0.260704	-0.0250124	-0.0714928	-0.153301	-0.10419		0	-0.0625737	-0.0575182	0.0460916	-0.227093		0.0344036	0.0600587	-0.225904	-0.0407943	-0.086876		-0.136119	-0.241471	-0.0103932	-0.0307602	-0.0543263			0.0233553	0.904494		-0.00072199	0.997479		0.0459139	0.804598		-0.0275164	0.904959		0	0	0	0		GO:0001570~vasculogenesis;GO:0001701~in utero embryonic development;GO:0048739~cardiac muscle fiber development
>sp|Q8WZ42|TITIN_HUMAN Titin OS=Homo sapiens OX=9606 GN=TTN PE=1 SV=4S(29958)	Q8WZ42	TTN	S(29958)	VLAKAGVISKGSESTGPVTCRDEYAPPKA	Peptide10080		-1.11288	-0.397591	0.162232	0.17693	0.116722		0	-0.81031	-0.057257	0.237937	0.0890671		0.0213145	-0.201274	0.0468613	-0.0976272	0.0593403		-0.337732	-0.132977	-0.184859	0.247681	0.199604			-0.0282139	0.948236		0.349068	0.37161		0.498554	0.163122		0.473507	0.193648		0	0	0.486407	0		GO:0002576~platelet degranulation;GO:0003300~cardiac muscle hypertrophy;GO:0006936~muscle contraction;GO:0006941~striated muscle contraction;GO:0007076~mitotic chromosome condensation;GO:0018108~peptidyl-tyrosine phosphorylation;GO:0030049~muscle filament sliding;GO:0030240~skeletal muscle thin filament assembly;GO:0030241~skeletal muscle myosin thick filament assembly;GO:0035995~detection of mus…
>sp|Q8WZ42|TITIN_HUMAN Titin OS=Homo sapiens OX=9606 GN=TTN PE=1 SV=4T(29963)	Q8WZ42	TTN	T(29963)	AAGVISKGSESTGPVTCRDEYAPPKAELDAR	Peptide10081		-0.48439	-0.0953768	0.0770096	0.193287	0.0568452		0	-0.349051	0.203455	0.245902	0.00149363		-0.0587751	-0.138192	0.178879	0.0640395	-0.0326468		-0.212853	-0.230934	-0.172433	0.369901	0.191733			-0.0143839	0.955155		0.260732	0.223547		0.407287	0.0541453		0.243361	0.258958		0	0	0.453729	0		GO:0002576~platelet degranulation;GO:0003300~cardiac muscle hypertrophy;GO:0006936~muscle contraction;GO:0006941~striated muscle contraction;GO:0007076~mitotic chromosome condensation;GO:0018108~peptidyl-tyrosine phosphorylation;GO:0030049~muscle filament sliding;GO:0030240~skeletal muscle thin filament assembly;GO:0030241~skeletal muscle myosin thick filament assembly;GO:0035995~detection of mus…
>sp|O75533|SF3B1_HUMAN Splicing factor 3B subunit 1 OS=Homo sapiens OX=9606 GN=SF3B1 PE=1 SV=3T(244)	O75533	SF3B1	T(244)	SLRWDETPGRAKGSETPGATPGSKIWDPTPS	Peptide10082		-1.36435	0.032626	0.170857	-0.0482388	0.162549		0	-0.403112	-0.120306	-0.316354	0.185661		0.151551	-0.434054	-0.308548	0.219907	0.68237		-0.0650521	0.232479	0.0998191	-0.321963	0.276911			0.176447	0.725789		0.279918	0.636365		0.2028	0.69234		0.646335	0.175108		0	0	0.461871	0		epigenetic;GO:0000245~spliceosomal complex assembly;GO:0000375~R splicing;GO:0000398~mR splicing;GO:0045815~positive regulation of gene expression;via spliceosome;via transesterification reactions
>sp|D6RIA3|CD054_HUMAN Uncharacterized protein C4orf54 OS=Homo sapiens OX=9606 GN=C4orf54 PE=2 SV=1S(1118)	D6RIA3	C4orf54	S(1118)	HQVRDVRKLIKGSGDSSDKGSVTPEQGLTGP	Peptide10083		-0.545249	-1.11626	-0.528261	-0.799055	-0.678153		0						-0.536684	-0.901526	-0.197399	-0.67837	-1.1031									-0.467926	0.169882		0.178137	0.699311		-0.197746	0.598378		-0.349661	0.375361		0	0.368	0	0		GO:0045149~acetoin metabolic process
>sp|Q8WZ42|TITIN_HUMAN Titin OS=Homo sapiens OX=9606 GN=TTN PE=1 SV=4S(30941)	Q8WZ42	TTN	S(30941)	GLEYEHRVTAIRGSGKPSRPSKPIVAMDP	Peptide10084		0.0528685	-0.0423666	0.138938	0.00353713	0.00743667		0	-0.014056	0.0741982	0.0809644	-0.0541558		-0.0156832	-0.0299103	0.0462087	0.343866	-0.0602471		0.31703	-0.00291669	0.107365	-0.0178283	-0.101366			-0.110866	0.486159		0.00312383	0.991782		0.014081	0.94309		-0.140637	0.432252		0	0	0	0		GO:0002576~platelet degranulation;GO:0003300~cardiac muscle hypertrophy;GO:0006936~muscle contraction;GO:0006941~striated muscle contraction;GO:0007076~mitotic chromosome condensation;GO:0018108~peptidyl-tyrosine phosphorylation;GO:0030049~muscle filament sliding;GO:0030240~skeletal muscle thin filament assembly;GO:0030241~skeletal muscle myosin thick filament assembly;GO:0035995~detection of mus…
>sp|Q8WZ42|TITIN_HUMAN Titin OS=Homo sapiens OX=9606 GN=TTN PE=1 SV=4T(19085)	Q8WZ42	TTN	T(19085)	GSDDWERVHKGSIKETHYMVDRCVENQIYEF	Peptide10085		0.310756	0.242424	-0.258412	-0.185013	0.112285		0	0.0226004	-0.227004	0.057971	0.169491		-0.0451409	-0.440046	0.0130583	0.263207	-0.0673723		0.0710423	-0.242138	-0.118106	0.244113	-0.081			-0.188454	0.436231		-0.23178	0.406738		0.010905	0.971376		-0.0508133	0.882023		0.486833	0	0	0		GO:0002576~platelet degranulation;GO:0003300~cardiac muscle hypertrophy;GO:0006936~muscle contraction;GO:0006941~striated muscle contraction;GO:0007076~mitotic chromosome condensation;GO:0018108~peptidyl-tyrosine phosphorylation;GO:0030049~muscle filament sliding;GO:0030240~skeletal muscle thin filament assembly;GO:0030241~skeletal muscle myosin thick filament assembly;GO:0035995~detection of mus…
>sp|Q8TDC0|MYOZ3_HUMAN Myozenin-3 OS=Homo sapiens OX=9606 GN=MYOZ3 PE=1 SV=2S(49)	Q8TDC0	MYOZ3	S(49)	QDLMMEELSLRNNRGSLLFQKRQRRVQKFTF	Peptide10086		0.204616	-1.15615	0.0618687	-0.518935	-0.747889		0	-0.759986	-0.574978	-0.434512	-0.523643		-0.467144	-1.07684	-0.247544	-0.667147	-0.182003		0.193775	-1.38827	-0.560712	-0.776705	-0.206761			-1.07812	0.000956655		-0.313153	0.386715		-0.582137	0.0782879		-0.397885	0.243849		0.573983	0	0	0		GO:0030239~myofibril assembly
>sp|Q8WZ42|TITIN_HUMAN Titin OS=Homo sapiens OX=9606 GN=TTN PE=1 SV=4T(5443)	Q8WZ42	TTN	T(5443)	GTAAFQATLKGSLPITVTWLKDSDEITEDDN	Peptide10087		-0.405252	0.256223	-0.69982	-0.522351	-0.340946		0	-0.19897	-0.57911	-0.582178	-0.2854		-0.244777	-0.988021	-0.105582	-0.050393	-0.525744		-0.363871	-0.31948	-0.225619	-0.406023	-0.405195			-0.0590868	0.889915		-0.149058	0.766873		-0.136761	0.734983		-0.135846	0.770638		0	0	0	0		GO:0002576~platelet degranulation;GO:0003300~cardiac muscle hypertrophy;GO:0006936~muscle contraction;GO:0006941~striated muscle contraction;GO:0007076~mitotic chromosome condensation;GO:0018108~peptidyl-tyrosine phosphorylation;GO:0030049~muscle filament sliding;GO:0030240~skeletal muscle thin filament assembly;GO:0030241~skeletal muscle myosin thick filament assembly;GO:0035995~detection of mus…
>sp|P51114|FXR1_HUMAN Fragile X mental retardation syndrome-related protein 1 OS=Homo sapiens OX=9606 GN=FXR1 PE=1 SV=3S(11)	P51114	FXR1	S(11)	_____MAELTVEVRGSNGAFYKGFIKDVHED	Peptide10088		-1.48071	-0.951894	-0.887806	-0.967813	-0.417078		0						-0.472414	-0.666014	-0.719915	-0.821246	-0.0616335									0.167609	0.782079		0.172703	0.83773		0.0820342	0.899479		0.737208	0.235784		0	0	0.524284	0		GO:0006915~apoptotic process;GO:0007517~muscle organ development;GO:0017148~negative regulation of translation;GO:0030154~cell differentiation;GO:2000637~positive regulation of gene silencing by miR
>tr||C9JFV4|C9JFV4_HUMAN Proline-; glutamic acid- and leucine-rich protein 1 OS=Homo sapiens OX=9606 GN=PELP1 PE=1 SV=2S(531)	C9JFV4	PELP1	S(531)	ISPPADALKLRSPRGSPDGSLQTGKPSAPKK	Peptide10089		-1.1616	-1.34191	-0.231433	-0.201353	-0.655324		0						-0.453424	-0.890344	-0.473226	-0.419046	-0.446251									-0.308618	0.513582		0.45518	0.407335		0.49731	0.319212		0.256722	0.64518		0	0	0.44986	0		D-templated;GO:0006351~transcription;GO:0006364~rR processing;GO:0045944~positive regulation of transcription from R polymerase II promoter;GO:0071391~cellular response to estrogen stimulus
>sp|P49908|SEPP1_HUMAN Selenoprotein P OS=Homo sapiens OX=9606 GN=SELENOP PE=1 SV=3S(266)	P49908	SELENOP	S(266)	GQHRQGHPENRDMPASEDLQDLQKKLCRKRC	Peptide1009		0.159268	-0.0245742	-0.164921	-0.0450694	-0.0142407		0	-0.0174517	-0.263336	-0.0434672	0.0353869		0.00674597	-0.0476413	-0.0765084	-0.166541	0.0151721		0.00309125	0.192668	-0.0669021	-0.139913	-0.122179			-0.0165263	0.926406		-0.185193	0.222546		-0.141024	0.338483		-0.0637416	0.723632		0	0	0	0		GO:0001887~selenium compound metabolic process;GO:0002576~platelet degranulation;GO:0006979~response to oxidative stress;GO:0007420~brain development;GO:0007626~locomotory behavior;GO:0009791~post-embryonic development;GO:0019953~sexual reproduction;GO:0040007~growth
>sp|P29536|LMOD1_HUMAN Leiomodin-1 OS=Homo sapiens OX=9606 GN=LMOD1 PE=1 SV=3S(516)	P29536	LMOD1	S(516)	AGAVAKGSPKPSPQPSPKPSPKNSPKKGGAP	Peptide10090		-0.488865	1.04482	-0.0709255	-0.27915	0.0862821		0	0.545219	-0.217272	-0.127743	0.211518		-0.17162	0.254773	0.205613	-0.202489	0.267447		-0.232149	0.589646	-0.00751146	0.117748	0.0220408			0.831774	0.00143218		0.200634	0.527631		0.10025	0.736288		0.36998	0.171835		0	0	0.435887	0		GO:0006936~muscle contraction;GO:0007015~actin filament organization;GO:0030239~myofibril assembly;GO:0030838~positive regulation of actin filament polymerization;GO:0045010~actin nucleation;GO:0051694~pointed-end actin filament capping
>sp|O15061|SYNEM_HUMAN Synemin OS=Homo sapiens OX=9606 GN=SYNM PE=1 SV=2S(389)	O15061	SYNM	S(389)	LYSNLSGHRGSQTGTSIGGDARRGFLGSGYS	Peptide10091		-1.82556	-1.21099	-0.62338	-0.726644	-0.718802		0						-0.594289	-1.14395	-0.276035	-0.999434	-0.514716									0.0324539	0.966777		0.760217	0.285657		0.346885	0.61253		0.593165	0.412107		0	0.54154	0	0		GO:0031443~fast-twitch skeletal muscle fiber contraction;GO:0045104~intermediate filament cytoskeleton organization
>sp|Q8NC56|LEMD2_HUMAN LEM domain-containing protein 2 OS=Homo sapiens OX=9606 GN=LEMD2 PE=1 SV=1S(139)	Q8NC56	LEMD2	S(139)	ARPAQLRRRASVRGSSEEDEDARTPDRATQG	Peptide10092		-0.348048	-0.473626	-0.441011	-0.235879	-0.691818		0	-0.720945	-0.844488	-0.465827	-0.406362		0.137854	-0.971272	-0.448064	-0.566845	-0.483289		-0.398773	0.0173868	-0.520391	-0.547516	-0.601859			-0.384872	0.176777		-0.411247	0.20575		-0.301775	0.339286		-0.39359	0.226787		0	0	0	0.470038		GO:0006998~nuclear envelope organization;GO:0022008~neurogenesis;GO:0030514~negative regulation of BMP sigling pathway;GO:0035914~skeletal muscle cell differentiation;GO:0043409~negative regulation of MAPK cascade;GO:0051898~negative regulation of protein kise B sigling;GO:0060914~heart formation;GO:0070197~meiotic attachment of telomere to nuclear envelope
>sp|Q8WZ42|TITIN_HUMAN Titin OS=Homo sapiens OX=9606 GN=TTN PE=1 SV=4S(8739)	Q8WZ42	TTN	S(8739)	IVKGTPPFSVSWFKGSSELVPGDRCNVSLED	Peptide10093		-0.75113	-0.138523	-0.0699355	0.161491	-0.134014		0	-0.163884	-0.574977	0.287644	-0.118813		-0.459908	0.0127348	-0.0914528	-0.203986	0.116119		-0.287013	-0.0129686	-0.462654	-0.207604	0.27121			0.298853	0.269933		0.0747579	0.870719		0.383899	0.193599		0.408138	0.169849		0	0	0.626526	0		GO:0002576~platelet degranulation;GO:0003300~cardiac muscle hypertrophy;GO:0006936~muscle contraction;GO:0006941~striated muscle contraction;GO:0007076~mitotic chromosome condensation;GO:0018108~peptidyl-tyrosine phosphorylation;GO:0030049~muscle filament sliding;GO:0030240~skeletal muscle thin filament assembly;GO:0030241~skeletal muscle myosin thick filament assembly;GO:0035995~detection of mus…
>sp|Q8WZ42|TITIN_HUMAN Titin OS=Homo sapiens OX=9606 GN=TTN PE=1 SV=4S(8740)	Q8WZ42	TTN	S(8740)	VKGTPPFSVSWFKGSSELVPGDRCNVSLEDS	Peptide10094		0.239448	0.196282	-0.182328	-0.284214	0.0156466		0	0.0899004	0.0288111	-0.0587867	-0.0390784		-0.126144	0.105177	0.18133	-0.500057	0.0104015		-0.121355	-0.0792108	-0.036875	0.021124	-0.0867505			0.08005	0.723421		-0.000252644	0.99936		-0.203471	0.339316		-0.0229324	0.942448		0	0	0	0.363877		GO:0002576~platelet degranulation;GO:0003300~cardiac muscle hypertrophy;GO:0006936~muscle contraction;GO:0006941~striated muscle contraction;GO:0007076~mitotic chromosome condensation;GO:0018108~peptidyl-tyrosine phosphorylation;GO:0030049~muscle filament sliding;GO:0030240~skeletal muscle thin filament assembly;GO:0030241~skeletal muscle myosin thick filament assembly;GO:0035995~detection of mus…
>sp|Q9Y623|MYH4_HUMAN Myosin-4 OS=Homo sapiens OX=9606 GN=MYH4 PE=2 SV=2S(647)	Q9Y623	MYH4	S(647)	AEGGGGKKGGKKKGSSFQTVSALFRENLNKL	Peptide10095		-0.260812	0.0441382	0.195098	-0.0588068	0.25019		0	-0.0451953	0.268299	0.120202	0.00293905		0.357568	0.0038299	-0.192153	0.197869	0.359234		-0.00665293	0.424024	0.190024	-0.3614	0.287351			0.0841736	0.781034		0.0927913	0.819728		-0.0480596	0.881659		0.202403	0.50969		0	0	0	0		GO:0006936~muscle contraction;GO:0014823~response to activity;GO:0030048~actin filament-based movement;GO:0030049~muscle filament sliding;GO:0046034~ATP metabolic process
>sp|P13533|MYH6_HUMAN Myosin-6 OS=Homo sapiens OX=9606 GN=MYH6 PE=1 SV=5S(644)	P13533	MYH6	S(644)	DTGDSGKSKGGKKKGSSFQTVSALHRENLNK	Peptide10096		-0.406075	0.118564	-0.0723876	-0.216159	-0.406452		0	0.0590222	-0.397876	-0.561539	-0.140532		-0.141919	-0.111858	-0.110828	-0.363553	-0.213545		-0.118902	0.155626	-0.248456	-0.375109	-0.222146			0.222062	0.211324		-0.0406629	0.900653		-0.212366	0.280885		-0.0789446	0.747547		0	0	0.330032	0		GO:0001701~in utero embryonic development;GO:0002026~regulation of the force of heart contraction;GO:0002027~regulation of heart rate;GO:0006470~protein dephosphorylation;GO:0006936~muscle contraction;GO:0006941~striated muscle contraction;GO:0007512~adult heart development;GO:0007522~visceral muscle development;GO:0008016~regulation of heart contraction;GO:0008217~regulation of blood pressure;GO…
>sp|Q9NUL3|STAU2_HUMAN Double-s>tr|anded R-binding protein Staufen homolog 2 OS=Homo sapiens OX=9606 GN=STAU2 PE=1 SV=2S(492)	Q9NUL3	STAU2	S(492)	AEAIGLKGSSPTPPCSPVQPSKQLEYLARIQ	Peptide10097		-1.28779	-0.45877	-0.245755	-1.25379	-0.707196		0						-0.490223	-0.846295	-0.125775	-1.23218	-0.500282									0.236476	0.621711		0.703244	0.184772		-0.353975	0.474914		0.28527	0.6043		0	0.721014	0	0		GO:0006810~transport
>sp|Q14315|FLNC_HUMAN Filamin-C OS=Homo sapiens OX=9606 GN=FLNC PE=1 SV=3S(2627)	Q14315	FLNC	S(2627)	ETVTKSSSSRGSSYSSIPKFSSDASKVVTRG	Peptide10098		-0.78128	-2.15592	0.278875	-0.778594	-1.17396		0	-1.67972	-0.170129	-0.66564	-1.4748		-0.750395	-1.43273	0.00491313	-1.0253	-0.719699		0.0112156	-1.83568	-0.19772	-1.88807	-0.424879			-1.3959	0.00312252		0.359099	0.543955		-0.709285	0.153274		-0.56822	0.271257		0.424677	0	0	0		GO:0034329~cell junction assembly;GO:0048747~muscle fiber development
>tr||A0A0U1RRM6|A0A0U1RRM6_HUMAN Protein ebled homolog OS=Homo sapiens OX=9606 GN=EH PE=1 SV=1T(696)	A0A0U1RRM6	EH	T(696)	SALLARRRRIAEKGSTIETEQKEDKGEDSEP	Peptide10099		-1.434	-0.767892	-0.863737	-0.662093	-0.679035		0						-0.556474	-0.808347	-0.742511	-0.320979	-0.689931									0.207116	0.681502		0.192112	0.779693		0.5037	0.323803		0.310753	0.578812		0	0	0.648528	0
>sp|O94819|KBTBB_HUMAN Kelch repeat and BTB domain-containing protein 11 OS=Homo sapiens OX=9606 GN=KBTBD11 PE=1 SV=1S(107)	O94819	KBTBD11	S(107)	ASPEERACPEEPAAPSPEPRVWLEDPASPEE	Peptide101		0.233193	-0.15225	-0.0827739	-0.101616	-0.195425		0	-0.0622768	-0.360685	-0.449531	0.121627		0.0282698	-0.435088	-0.12847	-0.13685	-0.038865		0.0708795	-0.0308205	-0.0777761	-0.239061	-0.195424			-0.253194	0.168996		-0.245512	0.246105		-0.31485	0.123114		-0.160107	0.477372		0	0	0	0.602536		GO:0016567~protein ubiquitition
>sp|Q96S82|UBL7_HUMAN Ubiquitin-like protein 7 OS=Homo sapiens OX=9606 GN=UBL7 PE=1 SV=2S(230)	Q96S82	UBL7	S(230)	SSYRDMPGGFLFEGLSDDEDDFHPNTRSTPS	Peptide1010		0.128447	-0.039576	-0.31354	-0.208424	-0.0313774		0	-0.237758	-0.267638	-0.0961534	0.0317656		0.196961	-0.539845	-0.196971	-0.0424878	-0.210741		-0.273058	-0.213941	-0.110951	0.0213552	-0.134387			-0.270868	0.14577		-0.235363	0.279221		-0.0945153	0.67118		-0.0992728	0.688059		0.542537	0	0	0
>sp|D6RIA3|CD054_HUMAN Uncharacterized protein C4orf54 OS=Homo sapiens OX=9606 GN=C4orf54 PE=2 SV=1T(1125)	D6RIA3	C4orf54	T(1125)	KLIKGSGDSSDKGSVTPEQGLTGPKPRQLSA	Peptide10100		-0.120013	-0.493684	0.00678366	0.493844	0.454087		0	-0.310546	-0.34308	-0.231938	0.784189		0.628123	-0.0351542	-0.565047	0.449325	0.172575		0.0219448	0.457662	0.014318	0.108111	0.282061			-0.227944	0.567808		-0.35427	0.432071		0.0723215	0.876876		0.290714	0.514063		0.422853	0	0	0		GO:0045149~acetoin metabolic process
>sp|P20929|NEBU_HUMAN Nebulin OS=Homo sapiens OX=9606 GN=NEB PE=1 SV=5T(5634)	P20929	NEB	T(5634)	EKHVKERGTCHAVPDTPQILLAKTVSNLVSE	Peptide10101		-1.55764	-0.90407	-0.51705	-0.757204	-0.852088		0						-0.60767	-0.474177	-0.405515	-0.714981	-0.766621									0.393531	0.450306		0.621372	0.290786		0.346562	0.532235		0.2733	0.660852		0	0	0.499756	0		GO:0007517~muscle organ development;GO:0007525~somatic muscle development;GO:0030049~muscle filament sliding;GO:0030832~regulation of actin filament length
>sp|P06753|TPM3_HUMAN >tr|opomyosin alpha-3 chain OS=Homo sapiens OX=9606 GN=TPM3 PE=1 SV=2Y(61)	P06753	TPM3	Y(61)	AMQKKLKGTEDELDKYSEALKDAQEKLELAE	Peptide10102		-1.06968	-0.382815	0.21011	0.207663	0.0144789		0	-0.409538	-0.16493	-0.263623	0.25541		-0.0460333	-0.16047	-0.320574	0.157615	0.375773		-0.124632	-0.66396	0.0317757	0.289241	0.270434			-0.0941083	0.813923		0.249183	0.573935		0.407812	0.264134		0.539111	0.140667		0	0	0.451404	0		GO:0006928~movement of cell or subcellular component;GO:0006936~muscle contraction;GO:0007015~actin filament organization;GO:0030049~muscle filament sliding
>tr||Q5TCU3|Q5TCU3_HUMAN >tr|opomyosin beta chain OS=Homo sapiens OX=9606 GN=TPM2 PE=1 SV=1Y(60)	Q5TCU3	TPM2	Y(60)	ALQKKLKGTEDEVEKYSESVKEAQEKLEQAE	Peptide10103		0.896132	0.681371	0.538403	0.519206	0.1577		0	0.501845	-0.00966616	0.0417126	0.892725		0.783545	-0.257129	0.288114	0.559995	0.21896		0.116703	1.39976	0.420794	0.588404	-0.192188			0.132366	0.822698		-0.139684	0.86559		-0.0217653	0.972088		-0.179796	0.79666		0	0	0	0.564643		GO:0006936~muscle contraction;GO:0007015~actin filament organization;GO:0030049~muscle filament sliding;GO:0043462~regulation of ATPase activity
>tr||Q5TCU3|Q5TCU3_HUMAN >tr|opomyosin beta chain OS=Homo sapiens OX=9606 GN=TPM2 PE=1 SV=1S(61)	Q5TCU3	TPM2	S(61)	LQKKLKGTEDEVEKYSESVKEAQEKLEQAEK	Peptide10104		-0.726813	-0.118684	0.233477	0.182965	-0.173031		0	-0.259271	0.119662	0.315418	-0.291073		0.020844	-0.193933	-0.153526	0.112091	0.239676		-0.22918	-0.10851	-0.16868	-0.0363866	0.262321			0.0636876	0.847825		0.241521	0.470391		0.377309	0.195745		0.243261	0.442966		0	0	0.531766	0		GO:0006936~muscle contraction;GO:0007015~actin filament organization;GO:0030049~muscle filament sliding;GO:0043462~regulation of ATPase activity
>sp|Q8WZ42|TITIN_HUMAN Titin OS=Homo sapiens OX=9606 GN=TTN PE=1 SV=4T(25183)	Q8WZ42	TTN	T(25183)	GSRVLGYVVEMQPKGTEKWSIVAESKVCV	Peptide10105		-0.299391	-0.55947	-0.65633	-1.10912	-0.798901		0						-0.489119	-0.789719	-0.336126	-0.859494	-0.742368									-0.28034	0.374958		-0.101973	0.833982		-0.590053	0.10669		-0.37638	0.292685		0	0.321309	0	0		GO:0002576~platelet degranulation;GO:0003300~cardiac muscle hypertrophy;GO:0006936~muscle contraction;GO:0006941~striated muscle contraction;GO:0007076~mitotic chromosome condensation;GO:0018108~peptidyl-tyrosine phosphorylation;GO:0030049~muscle filament sliding;GO:0030240~skeletal muscle thin filament assembly;GO:0030241~skeletal muscle myosin thick filament assembly;GO:0035995~detection of mus…
>sp|Q8WZ42|TITIN_HUMAN Titin OS=Homo sapiens OX=9606 GN=TTN PE=1 SV=4S(25187)	Q8WZ42	TTN	S(25187)	LGYVVEMQPKGTEKWSIVAESKVCVVTGL	Peptide10106		0.0214246	0.00526382	0.0809937	0.0885555	0.136594		0	-0.0607106	0.000687848	0.113297	0.192466		0.031412	0.0576633	0.114487	0.0272135	0.0511414		0.0322865	0.108306	0.0117552	0.194468	0.0373021			0.00634994	0.96798		0.0307002	0.882631		0.0846029	0.529301		0.0830953	0.57275		0	0	0	0		GO:0002576~platelet degranulation;GO:0003300~cardiac muscle hypertrophy;GO:0006936~muscle contraction;GO:0006941~striated muscle contraction;GO:0007076~mitotic chromosome condensation;GO:0018108~peptidyl-tyrosine phosphorylation;GO:0030049~muscle filament sliding;GO:0030240~skeletal muscle thin filament assembly;GO:0030241~skeletal muscle myosin thick filament assembly;GO:0035995~detection of mus…
>sp|Q8WZ42|TITIN_HUMAN Titin OS=Homo sapiens OX=9606 GN=TTN PE=1 SV=4S(27072)	Q8WZ42	TTN	S(27072)	WKTSIQSLRGTEYTISGLTTGAEYVFRVKSV	Peptide10107		0.131871	-0.141628	-0.00943363	0.107135	0.00690671		0	-0.130425	-0.00382801	0.0484214	0.0588925		-0.0813338	-0.203674	0.141459	-0.0835558	-0.00184145		-0.0298406	-0.0034584	-0.174919	-0.0194665	0.102539			-0.12497	0.385333		-0.0168544	0.948552		0.00795948	0.965664		0.0364501	0.858205		0	0	0	0		GO:0002576~platelet degranulation;GO:0003300~cardiac muscle hypertrophy;GO:0006936~muscle contraction;GO:0006941~striated muscle contraction;GO:0007076~mitotic chromosome condensation;GO:0018108~peptidyl-tyrosine phosphorylation;GO:0030049~muscle filament sliding;GO:0030240~skeletal muscle thin filament assembly;GO:0030241~skeletal muscle myosin thick filament assembly;GO:0035995~detection of mus…
>sp|Q8WZ42|TITIN_HUMAN Titin OS=Homo sapiens OX=9606 GN=TTN PE=1 SV=4T(27075)	Q8WZ42	TTN	T(27075)	SIQSLRGTEYTISGLTTGAEYVFRVKSVNKV	Peptide10108		0.422007	-0.26066	0.0782585	-0.210909	-0.0188599		0	-0.153784	-0.155369	0.16495	-0.036141		0.0763088	-0.0869081	-0.0575998	-0.304539	0.0562412		0.0519319	-0.0822838	-0.0295519	-0.190045	-0.063625			-0.283471	0.10748		-0.178627	0.412575		-0.272698	0.165377		-0.153158	0.4787		0	0	0	0.609579		GO:0002576~platelet degranulation;GO:0003300~cardiac muscle hypertrophy;GO:0006936~muscle contraction;GO:0006941~striated muscle contraction;GO:0007076~mitotic chromosome condensation;GO:0018108~peptidyl-tyrosine phosphorylation;GO:0030049~muscle filament sliding;GO:0030240~skeletal muscle thin filament assembly;GO:0030241~skeletal muscle myosin thick filament assembly;GO:0035995~detection of mus…
>sp|Q9UMS6|SYNP2_HUMAN Syptopodin-2 OS=Homo sapiens OX=9606 GN=SYNPO2 PE=1 SV=2S(729)	Q9UMS6	SYNPO2	S(729)	LQNSEGKRGTGAGGDSGPEEDYLSLGAEACN	Peptide10109		-0.0927436	-0.29275	-0.0676319	-0.0687692	-0.0341005		0	-0.221715	-0.0466624	-0.234707	-0.000493025		-0.0390228	-0.171338	-0.00777569	-0.245467	-0.169261		-0.183853	-0.181208	-0.131988	-0.236802	0.10558			-0.137848	0.298912		0.0153905	0.95052		-0.117531	0.414442		0.0543364	0.765815		0	0	0	0		GO:0032233~positive regulation of actin filament bundle assembly
>sp|Q9UBY0|SL9A2_HUMAN Sodium/hydrogen exchanger 2 OS=Homo sapiens OX=9606 GN=SLC9A2 PE=2 SV=1T(746)	Q9UBY0	SLC9A2	T(746)	WKNEVDVDSGRDMPSTPPTPHSREKGTQTSG	Peptide1011		-0.74014	-0.828499	-0.451389	-1.20572	-0.759759		0						-0.432149	-0.775095	-0.170786	-1.01719	-0.460604									-0.215652	0.519704		0.275057	0.495991		-0.525312	0.156586		-0.0240369	0.961875		0	0.576203	0	0		GO:0006811~ion transport;GO:0008104~protein localization;GO:0051453~regulation of intracellular pH;GO:0071805~potassium ion transmembrane transport;GO:0098719~sodium ion import across plasma membrane;GO:1902600~hydrogen ion transmembrane transport
>sp|P10412|H14_HUMAN Histone H1.4 OS=Homo sapiens OX=9606 GN=HIST1H1E PE=1 SV=2S(102)	P10412	HIST1H1E	S(102)	LVSKGTLVQTKGTGASGSFKLNKKAASGEAK	Peptide10110		0.0263942	0.190061	0.237162	0.210804	0.0756642		0	0.0271973	-0.0405937	0.111359	0.305572		0.17916	-0.155793	0.108442	0.377654	-0.0724725		0.109827	0.450808	-0.20148	0.232497	0.0965648			0.0492231	0.849051		-0.0529625	0.883419		0.154233	0.50744		0.0224869	0.948184		0	0	0	0		GO:0000122~negative regulation of transcription from R polymerase II promoter;GO:0006334~nucleosome assembly;GO:0016584~nucleosome positioning;GO:0080182~histone H3-K4 trimethylation;GO:0098532~histone H3-K27 trimethylation
>sp|Q8WZ42|TITIN_HUMAN Titin OS=Homo sapiens OX=9606 GN=TTN PE=1 SV=4T(17405)	Q8WZ42	TTN	T(17405)	GKEEWEKGKDKEVRGTKLVVTGLKEGAFYKF	Peptide10111		0.125723	-0.216969	-0.105657	-0.0518741	-0.0495023		0	-0.0102773	-0.00182191	0.179467	-0.235355		-0.0204579	-0.224566	-0.196822	0.15966	-0.0401227		-0.228892	-0.554193	0.223543	-0.153901	0.0924284			-0.220595	0.298202		0.0107172	0.978942		0.0642444	0.803993		-0.0272314	0.936461		0.560785	0	0	0		GO:0002576~platelet degranulation;GO:0003300~cardiac muscle hypertrophy;GO:0006936~muscle contraction;GO:0006941~striated muscle contraction;GO:0007076~mitotic chromosome condensation;GO:0018108~peptidyl-tyrosine phosphorylation;GO:0030049~muscle filament sliding;GO:0030240~skeletal muscle thin filament assembly;GO:0030241~skeletal muscle myosin thick filament assembly;GO:0035995~detection of mus…
>sp|E9PAV3|CAM_HUMAN scent polypeptide-associated complex subunit alpha; muscle-specific form OS=Homo sapiens OX=9606 GN=CA PE=1 SV=1S(800)	E9PAV3	CA	S(800)	GTLTYLADSPSPLGVSVSPQTKRPPTKKGSA	Peptide10112		-0.290091	-0.778219	-0.649405	-0.0394137	-0.982264		0						0.480812	-1.21659	-1.31682	-0.22832	0.0272952									-1.09277	0.122499		-1.07847	0.180359		-0.229227	0.776208		-0.572845	0.480744		0.51636	0	0	0		D-templated;GO:0003231~cardiac ventricle development;GO:0006351~transcription;GO:0006355~regulation of transcription;GO:0006412~translation;GO:0010664~negative regulation of striated muscle cell apoptotic process;GO:0015031~protein transport;GO:0016032~viral process;GO:0043403~skeletal muscle tissue regeneration;GO:0048633~positive regulation of skeletal muscle tissue growth;GO:0048742~regulation…
>tr||A0A087X1N7|A0A087X1N7_HUMAN Nebulin OS=Homo sapiens OX=9606 GN=NEB PE=1 SV=1T(8022)	A0A087X1N7	NEB	T(8022)	ENFSSILYKENLSKGTPLPVTPEMERVKLNQ	Peptide10113		0.07567	-0.553684	-0.183848	0.37512	0.281471		0	-0.140475	-0.0584154	0.107579	0.117911		-0.544468	-0.0728434	0.0972434	-0.237131	0.780672		0.167129	-0.138592	-0.107192	-0.480753	0.539221			-0.150981	0.669739		0.0123644	0.982839		0.0166212	0.968425		0.505236	0.145736		0	0	0.301726	0
>sp|Q6P5Q4|LMOD2_HUMAN Leiomodin-2 OS=Homo sapiens OX=9606 GN=LMOD2 PE=1 SV=2S(392)	Q6P5Q4	LMOD2	S(392)	TKVWQRGTPSSSPYVSPRHSPWSSPKLPKKV	Peptide10114		0.435041	-1.36547	-1.70696	-0.340579	-0.164824		0	-1.44117	-0.909491	0.116695	-0.761353		-0.174643	-1.05383	-1.41554	-0.390041	0.648218		0.919581	-1.47369	-1.14292	-0.123626	-0.750069			-1.62853	0.00107241		-1.58872	0.00349164		-0.479382	0.342758		-0.552002	0.293989		0.512883	0	0	0		GO:0006936~muscle contraction;GO:0007015~actin filament organization;GO:0030041~actin filament polymerization;GO:0030239~myofibril assembly;GO:0030838~positive regulation of actin filament polymerization;GO:0045010~actin nucleation;GO:0045214~sarcomere organization;GO:0051694~pointed-end actin filament capping
>sp|E9PAV3|CAM_HUMAN scent polypeptide-associated complex subunit alpha; muscle-specific form OS=Homo sapiens OX=9606 GN=CA PE=1 SV=1T(1636)	E9PAV3	CA	T(1636)	PPSPEKGPATPAPKGTPTSPPVTPSSLKDSP	Peptide10115		0.0625748	0.577979	-0.670779	-0.763022	-2.10285		0						-0.289502	-0.962385	-1.13653	-0.60106	-0.441201									-0.0787392	0.953019		-0.790192	0.550897		-0.568577	0.622226		-1.15856	0.334025		0	0	0	0.450209		D-templated;GO:0003231~cardiac ventricle development;GO:0006351~transcription;GO:0006355~regulation of transcription;GO:0006412~translation;GO:0010664~negative regulation of striated muscle cell apoptotic process;GO:0015031~protein transport;GO:0016032~viral process;GO:0043403~skeletal muscle tissue regeneration;GO:0048633~positive regulation of skeletal muscle tissue growth;GO:0048742~regulation…
>sp|O96014|WNT11_HUMAN Protein Wnt-11 OS=Homo sapiens OX=9606 GN=WNT11 PE=1 SV=2S(123)	O96014	WNT11	S(123)	TRESAFVYALSAAAISHAIARACTSGDLPGC	Peptide10116		-1.208	-0.608119	-0.669334	-1.29828	-1.00332		0						-0.704691	-0.976879	-0.492124	-1.10163	-0.612466									0.163847	0.712035		0.375617	0.446685		-0.243608	0.58643		0.148454	0.787751		0	0.730076	0	0		calcium modulating pathway;D-templated;GO:0001649~osteoblast differentiation;GO:0001837~epithelial to mesenchymal transition;GO:0003151~outflow tract morphogenesis;GO:0003402~plar cell polarity pathway involved in axis elongation;GO:0006468~protein phosphorylation;GO:0007223~Wnt sigling pathway;GO:0007275~multicellular organism development;GO:0010628~positive regulation of gene expression;GO:0016…
>sp|O95425|SVIL_HUMAN Supervillin OS=Homo sapiens OX=9606 GN=SVIL PE=1 SV=2T(1244)	O95425	SVIL	T(1244)	ITPVASPICGKTRGTTPVSKPLEDIEARPDM	Peptide10117		-0.964404	-1.10531	-0.678721	-0.79809	-0.560041		0						-0.506159	-1.02548	-0.709846	-0.616453	-0.371593									-0.33011	0.305253		0.0409985	0.944014		0.0280104	0.943892		0.269465	0.475068		0	0	0.468294	0		GO:0007010~cytoskeleton organization;GO:0007519~skeletal muscle tissue development;GO:0032467~positive regulation of cytokinesis
>sp|Q9UMS6|SYNP2_HUMAN Syptopodin-2 OS=Homo sapiens OX=9606 GN=SYNPO2 PE=1 SV=2S(805)	Q9UMS6	SYNPO2	S(805)	PAFPTSNPSKGTVVSSIKIAQPSYPPARPAS	Peptide10118		0.0672604	-0.307689	-0.0937677	-0.193513	0.0435412		0	-0.202882	-0.171763	-0.151263	0.00935084		-0.109876	-0.523316	-0.121281	-0.0352186	0.114483		-0.00759404	-0.318951	-0.147285	-0.484295	0.237759			-0.325657	0.0396814		-0.120972	0.57462		-0.20352	0.250225		0.113836	0.568765		0.452487	0	0	0		GO:0032233~positive regulation of actin filament bundle assembly
>tr||A0A1X7SBR9|A0A1X7SBR9_HUMAN A disintegrin and metalloproteise with thrombospondin motifs 19 OS=Homo sapiens OX=9606 GN=ADAMTS19 PE=1 SV=1S(85);S(86)	A0A1X7SBR9	ADAMTS19	S(85);S(86)	RGVGGGGSARAQAAGSSREVRSVAPVPLEEP;GVGGGGSARAQAAGSSREVRSVAPVPLEEPV	Peptide10119		-0.652224	-0.202677	-0.540396	-1.75407	-0.969758		0						-0.535526	-1.01637	-0.265933	-2.00459	-0.348563									-0.0156489	0.981642		0.19071	0.808898		-1.28545	0.0526851		-0.0652858	0.935374		0	0.367614	0	0		GO:0006508~proteolysis
>sp|P27816|MAP4_HUMAN Microtubule-associated protein 4 OS=Homo sapiens OX=9606 GN=MAP4 PE=1 SV=3S(507)	P27816	MAP4	S(507)	VAPSTVKEVGLLKDMSPLSETEMALGKDVTP	Peptide1012		-0.310523	0.0272134	-0.199959	-0.576211	1.1253		0	-0.153901	0.294387	-0.0889532	0.554446		0.189417	-0.0306698	0.0716392	-0.108677	0.239115		-0.537163	0.208504	0.238835	-0.836438	1.06004			0.177354	0.645637		0.265793	0.566352		-0.238002	0.549612		0.909291	0.0207841		0	0.400484	0	0		GO:0007052~mitotic spindle organization;GO:0031175~neuron projection development;GO:0051012~microtubule sliding;GO:0051294~establishment of spindle orientation;GO:0051301~cell division;GO:1902856~negative regulation of nonmotile primary cilium assembly
>sp|Q8WZ42|TITIN_HUMAN Titin OS=Homo sapiens OX=9606 GN=TTN PE=1 SV=4S(32058)	Q8WZ42	TTN	S(32058)	LDVADVPDPPRGVKVSDVSRDSVNLTWTEPA	Peptide10120		-0.114169	0.0272186	0.0176254	-0.00157997	-0.0442661		0	-0.0879304	0.11513	0.161434	-0.145256		-0.0395426	-0.217381	0.0576791	0.0521406	0.0633042		-0.0920376	-0.112277	-0.0412389	-0.00520937	0.0746696			-0.0361552	0.821796		0.0987361	0.575983		0.113134	0.438463		0.0485503	0.797794		0	0	0	0		GO:0002576~platelet degranulation;GO:0003300~cardiac muscle hypertrophy;GO:0006936~muscle contraction;GO:0006941~striated muscle contraction;GO:0007076~mitotic chromosome condensation;GO:0018108~peptidyl-tyrosine phosphorylation;GO:0030049~muscle filament sliding;GO:0030240~skeletal muscle thin filament assembly;GO:0030241~skeletal muscle myosin thick filament assembly;GO:0035995~detection of mus…
>tr||A6NGQ3|A6NGQ3_HUMAN Obscurin OS=Homo sapiens OX=9606 GN=OBSCN PE=1 SV=5S(2743)	A6NGQ3	OBSCN	S(2743)	KIAMEKHRGVLECQVSRASAQVRWFKGSQEL	Peptide10121		-0.605779	-0.603172	-0.345588	-0.16349	-0.435032		0	-0.691729	0.127216	0.0271024	-0.906751		-0.3226	-0.355581	-0.140986	-0.0906871	-0.587283		0.00991764	-0.67843	-0.55882	-0.403131	-0.174762			-0.352613	0.217866		7.08e-05	0.99983		0.072064	0.843063		-0.296341	0.384084		0.374128	0	0	0		GO:0006468~protein phosphorylation;GO:0007275~multicellular organism development;GO:0035023~regulation of Rho protein sigl transduction;GO:0036309~protein localization to M-band;GO:0043065~positive regulation of apoptotic process;GO:0043547~positive regulation of GTPase activity;GO:0045214~sarcomere organization;GO:0051056~regulation of small GTPase mediated sigl transduction
>sp|Q8WZ42|TITIN_HUMAN Titin OS=Homo sapiens OX=9606 GN=TTN PE=1 SV=4S(25008)	Q8WZ42	TTN	S(25008)	TDKVQIEKGVNYTQLSIDNCDRNDAGKYILK	Peptide10122		0.135204	0.227177	-0.143904	-0.209224	0.00745497		0	-0.146182	0.248292	0.361314	-0.167994		0.134854	-0.148155	0.179944	-0.311909	-0.216105		-0.470664	-0.211192	-0.165822	0.365283	0.0105308			-0.0194362	0.95969		0.0797789	0.8698		0.101518	0.771078		-0.0413769	0.927117		0	0	0	0		GO:0002576~platelet degranulation;GO:0003300~cardiac muscle hypertrophy;GO:0006936~muscle contraction;GO:0006941~striated muscle contraction;GO:0007076~mitotic chromosome condensation;GO:0018108~peptidyl-tyrosine phosphorylation;GO:0030049~muscle filament sliding;GO:0030240~skeletal muscle thin filament assembly;GO:0030241~skeletal muscle myosin thick filament assembly;GO:0035995~detection of mus…
>sp|Q8WZ42|TITIN_HUMAN Titin OS=Homo sapiens OX=9606 GN=TTN PE=1 SV=4T(18468)	Q8WZ42	TTN	T(18468)	TTVRFPAIIRGVPVPTAKWTTDGSEIKTDEH	Peptide10123		0.519431	0.382684	0.332351	-0.0895252	-0.249988		0	0.490964	-0.239852	-0.278276	0.2944		-0.0860593	-0.0669486	0.237	0.120364	-0.373394		0.181915	0.0931109	-0.208884	0.186161	-0.097842			0.0711309	0.849418		-0.123668	0.792114		-0.169141	0.628843		-0.260528	0.472304		0	0	0	0.558515		GO:0002576~platelet degranulation;GO:0003300~cardiac muscle hypertrophy;GO:0006936~muscle contraction;GO:0006941~striated muscle contraction;GO:0007076~mitotic chromosome condensation;GO:0018108~peptidyl-tyrosine phosphorylation;GO:0030049~muscle filament sliding;GO:0030240~skeletal muscle thin filament assembly;GO:0030241~skeletal muscle myosin thick filament assembly;GO:0035995~detection of mus…
>sp|Q9UMS6|SYNP2_HUMAN Syptopodin-2 OS=Homo sapiens OX=9606 GN=SYNPO2 PE=1 SV=2S(663)	Q9UMS6	SYNPO2	S(663)	PWPQPAPWSQPAFYDSSERIASRDERISVPA	Peptide10124		0.0410724	-0.9512	-0.739435	-1.16686	-0.494118		0						0.419624	0.485685	-1.48365	-0.984206	-1.21795									-0.463106	0.591379		-1.34189	0.159827		-1.30588	0.162657		-1.08638	0.249893		0	0	0	0.567472		GO:0032233~positive regulation of actin filament bundle assembly
>sp|P54296|MYOM2_HUMAN Myomesin-2 OS=Homo sapiens OX=9606 GN=MYOM2 PE=1 SV=2S(1410)	P54296	MYOM2	S(1410)	VEQAKYVSMTIKGVTSEDSGKYSINIKNKYG	Peptide10125		0.489281	-0.221517	-0.0952546	-0.233773	0.765505		0	0.0210222	0.201363	0.128932	0.374429		0.0320774	0.0634784	-0.0534426	0.357304	0.351111		0.326455	-0.244071	0.347057	-0.311844	0.478282			-0.307225	0.24091		-0.112023	0.782227		-0.226799	0.433161		0.280378	0.360612		0.428108	0	0	0		GO:0006936~muscle contraction
>tr||H9KVB4|H9KVB4_HUMAN >tr|inucleotide repeat-containing gene 18 protein OS=Homo sapiens OX=9606 GN=TNRC18 PE=1 SV=1T(242)	H9KVB4	TNRC18	T(242)	ARGEEASGPRGVVDLTQEARAEGRQDRGPPR	Peptide10126		-0.952353	-0.491599	-0.446468	-0.405224	-0.747745		0						-0.528424	-0.538277	-0.37749	-0.887238	-0.241943									0.225451	0.610865		0.328409	0.534972		0.0941575	0.85114		0.245545	0.627196		0	0.510697	0	0
>sp|Q8WZ42|TITIN_HUMAN Titin OS=Homo sapiens OX=9606 GN=TTN PE=1 SV=4T(15062)	Q8WZ42	TTN	T(15062)	VEKRDVRRKGWQTVDTTVKDTKCTVTPLTEG	Peptide10127		0.000213643	0.123042	0.0360209	0.0111039	-0.0407665		0	0.135978	-0.0560609	0.0935914	-0.0741311		-0.147522	0.205755	0.116086	0.075738	-0.0600204		0.161173	0.147848	0.0826179	0.00470018	-0.151212			0.14969	0.23442		0.0411998	0.844501		0.0428172	0.78332		-0.0849987	0.59261		0	0	0	0		GO:0002576~platelet degranulation;GO:0003300~cardiac muscle hypertrophy;GO:0006936~muscle contraction;GO:0006941~striated muscle contraction;GO:0007076~mitotic chromosome condensation;GO:0018108~peptidyl-tyrosine phosphorylation;GO:0030049~muscle filament sliding;GO:0030240~skeletal muscle thin filament assembly;GO:0030241~skeletal muscle myosin thick filament assembly;GO:0035995~detection of mus…
>sp|Q8WZ42|TITIN_HUMAN Titin OS=Homo sapiens OX=9606 GN=TTN PE=1 SV=4T(15063)	Q8WZ42	TTN	T(15063)	EKRDVRRKGWQTVDTTVKDTKCTVTPLTEGS	Peptide10128		-0.85455	-0.475589	-0.799525	-0.974012	-0.534702		0						-0.601287	-0.858173	-0.358694	-0.488641	-0.553373									0.0610372	0.903891		0.148809	0.810672		-0.00340858	0.993561		0.183881	0.727491		0	0	0.488616	0		GO:0002576~platelet degranulation;GO:0003300~cardiac muscle hypertrophy;GO:0006936~muscle contraction;GO:0006941~striated muscle contraction;GO:0007076~mitotic chromosome condensation;GO:0018108~peptidyl-tyrosine phosphorylation;GO:0030049~muscle filament sliding;GO:0030240~skeletal muscle thin filament assembly;GO:0030241~skeletal muscle myosin thick filament assembly;GO:0035995~detection of mus…
>sp|Q8WZ42|TITIN_HUMAN Titin OS=Homo sapiens OX=9606 GN=TTN PE=1 SV=4T(15067)	Q8WZ42	TTN	T(15067)	VRRKGWQTVDTTVKDTKCTVTPLTEGSLYVF	Peptide10129		-0.658472	-0.506727	0.111135	0.44874	0.442074		0	-0.724065	0.244507	0.796588	0.0611844		0.0309691	-0.00403055	0.213804	0.170871	0.0372729		-0.352769	0.0933543	-0.0890867	0.171464	0.502064			-0.0402989	0.926569		0.365158	0.345628		0.641984	0.0755185		0.505717	0.163838		0	0	0.443597	0		GO:0002576~platelet degranulation;GO:0003300~cardiac muscle hypertrophy;GO:0006936~muscle contraction;GO:0006941~striated muscle contraction;GO:0007076~mitotic chromosome condensation;GO:0018108~peptidyl-tyrosine phosphorylation;GO:0030049~muscle filament sliding;GO:0030240~skeletal muscle thin filament assembly;GO:0030241~skeletal muscle myosin thick filament assembly;GO:0035995~detection of mus…
>sp|P27816|MAP4_HUMAN Microtubule-associated protein 4 OS=Homo sapiens OX=9606 GN=MAP4 PE=1 SV=3S(510)	P27816	MAP4	S(510)	STVKEVGLLKDMSPLSETEMALGKDVTPPPE	Peptide1013		-1.14674	-0.478006	-0.524531	-1.09227	-0.632648		0						-0.502258	-0.664644	-0.149917	-1.07798	-0.323316									0.253174	0.564835		0.487274	0.32181		-0.260629	0.576248		0.346516	0.484402		0	0.752607	0	0		GO:0007052~mitotic spindle organization;GO:0031175~neuron projection development;GO:0051012~microtubule sliding;GO:0051294~establishment of spindle orientation;GO:0051301~cell division;GO:1902856~negative regulation of nonmotile primary cilium assembly
>sp|Q8WZ42|TITIN_HUMAN Titin OS=Homo sapiens OX=9606 GN=TTN PE=1 SV=4S(18976)	Q8WZ42	TTN	S(18976)	TNFIVEYRKPNQKGWSIVASDVTKRLIKANL	Peptide10130		-0.579987	-0.68465	-0.289778	-0.316282	-0.577688		0						-0.310327	-0.383034	-0.216091	-0.385613	-0.258074									-0.0886848	0.806099		0.192222	0.651034		0.0942095	0.800158		0.027276	0.955855		0	0.451979	0	0		GO:0002576~platelet degranulation;GO:0003300~cardiac muscle hypertrophy;GO:0006936~muscle contraction;GO:0006941~striated muscle contraction;GO:0007076~mitotic chromosome condensation;GO:0018108~peptidyl-tyrosine phosphorylation;GO:0030049~muscle filament sliding;GO:0030240~skeletal muscle thin filament assembly;GO:0030241~skeletal muscle myosin thick filament assembly;GO:0035995~detection of mus…
>sp|Q8WZ42|TITIN_HUMAN Titin OS=Homo sapiens OX=9606 GN=TTN PE=1 SV=4T(18983)	Q8WZ42	TTN	T(18983)	RKPNQKGWSIVASDVTKRLIKANLLANNEYY	Peptide10131		0.456214	0.151498	-0.0555738	0.454164	0.350793		0	0.123278	-0.143516	0.444681	0.485595		0.290587	0.226947	0.150677	0.269062	-0.117952		-0.19003	0.642524	0.206845	0.502039	-0.0120519			0.146869	0.613341		-0.0995847	0.812837		0.278294	0.336605		0.0374031	0.929025		0.321492	0	0	0		GO:0002576~platelet degranulation;GO:0003300~cardiac muscle hypertrophy;GO:0006936~muscle contraction;GO:0006941~striated muscle contraction;GO:0007076~mitotic chromosome condensation;GO:0018108~peptidyl-tyrosine phosphorylation;GO:0030049~muscle filament sliding;GO:0030240~skeletal muscle thin filament assembly;GO:0030241~skeletal muscle myosin thick filament assembly;GO:0035995~detection of mus…
>sp|O95817|BAG3_HUMAN BAG family molecular chaperone regulator 3 OS=Homo sapiens OX=9606 GN=BAG3 PE=1 SV=3S(224)	O95817	BAG3	S(224)	PVIHEQNVTRPAAQPSFHQAQKTHYPAQQGE	Peptide10132		-0.441511	-0.257674	-0.919054	-1.23479	-0.816668		0						-0.359522	-1.44226	-0.310434	-0.674304	-0.687287									-0.449452	0.513929		-0.214227	0.838252		-0.554032	0.440565		-0.351461	0.671003		0	0	0	0.286986		GO:0006457~protein folding;GO:0007420~brain development;GO:0008625~extrinsic apoptotic sigling pathway via death domain receptors;GO:0010664~negative regulation of striated muscle cell apoptotic process;GO:0021510~spil cord development;GO:0043066~negative regulation of apoptotic process;GO:0050790~regulation of catalytic activity;GO:0050821~protein stabilization;GO:0071260~cellular response to me…
>sp|P68032|ACTC_HUMAN Actin; alpha cardiac muscle 1 OS=Homo sapiens OX=9606 GN=ACTC1 PE=1 SV=1T(204)	P68032	ACTC1	T(204)	DYLMKILTERGYSFVTTAEREIVRDIKEKLC	Peptide10133		-0.117608	-0.0992612	-0.211152	0.0926168	-0.388397		0	0.0868829	0.247488	-0.387726	-0.426578		-0.181094	-0.19458	-0.11577	-0.0369801	-0.126268		-0.0886729	-0.44031	-0.144894	-0.180597	-0.0118376			-0.0649733	0.809896		0.0407617	0.924357		-0.0313278	0.913524		-0.141426	0.61715		0	0	0	0		GO:0006915~apoptotic process;GO:0010628~positive regulation of gene expression;GO:0030048~actin filament-based movement;GO:0030049~muscle filament sliding;GO:0030240~skeletal muscle thin filament assembly;GO:0031032~actomyosin structure organization;GO:0033275~actin-myosin filament sliding;GO:0042493~response to drug;GO:0043066~negative regulation of apoptotic process;GO:0045471~response to ethan…
>sp|Q15149|PLEC_HUMAN Plectin OS=Homo sapiens OX=9606 GN=PLEC PE=1 SV=3T(4623)	Q15149	PLEC	T(4623)	TKGYYSPYSVSGSGSTAGSRTGSRTGSRAGS	Peptide10134		0.387834	-0.0490026	0.158552	0.379522	0.105804		0	0.23006	0.0158002	0.154267	0.36313		-0.0723002	0.0994318	0.140995	0.0450167	0.0320657		-0.152319	-0.0826544	-0.20892	0.311643	0.429301			0.00865494	0.976243		-0.0141968	0.974015		0.181808	0.453433		0.191771	0.467075		0	0	0	0		GO:0031581~hemidesmosome assembly;GO:0098609~cell-cell adhesion
>sp|P20929|NEBU_HUMAN Nebulin OS=Homo sapiens OX=9606 GN=NEB PE=1 SV=5S(4143)	P20929	NEB	S(4143)	DSVSVNHAKHAADIFSEKKYRTKIETLNFTP	Peptide10135		-0.0523142	-0.159061	0.131533	0.230504	0.131909		0	-0.140636	0.328925	0.11274	0.0139863		0.137543	0.0765618	0.163193	0.0888336	0.0448537		-0.0318582	0.221325	0.280046	0.0019822	0.043166			-0.013795	0.946516		0.212582	0.221967		0.0951723	0.591577		0.0451361	0.837413		0	0	0	0		GO:0007517~muscle organ development;GO:0007525~somatic muscle development;GO:0030049~muscle filament sliding;GO:0030832~regulation of actin filament length
>tr||U3KQK0|U3KQK0_HUMAN Histone H2B OS=Homo sapiens OX=9606 GN=HIST1H2BN PE=1 SV=1S(113)	U3KQK0	HIST1H2BN	S(113)	AVRLLLPGELAKHAVSEGTKAVTKYTSSKKR	Peptide10136		-1.15606	-0.760334	-0.581747	-0.208522	0.561882		0	-0.996096	0.00251567	-0.209847	-0.133128		-0.203993	-0.574561	-0.394338	0.262156	0.446235		0.206253	-0.436341	-0.0843176	-0.812771	0.394677			-0.403382	0.367549		0.0239794	0.97681		0.046205	0.934273		0.605868	0.215654		0	0	0.318121	0
>sp|Q8WZ42|TITIN_HUMAN Titin OS=Homo sapiens OX=9606 GN=TTN PE=1 SV=4S(21921)	Q8WZ42	TTN	S(21921)	STVSLAWPKPKHDGGSKITGYVIEAQRKGSD	Peptide10137		0.725782	0.563427	0.00627422	-0.274275	-0.143318		0	0.52431	0.110052	-0.00743785	0.000746009		-0.20004	0.0335491	0.267865	0.0625857	-0.187582		0.268957	-0.349224	-0.144961	0.456987	-0.185887			-0.00565905	0.989482		-0.138867	0.797073		-0.13921	0.740182		-0.327685	0.426067		0	0	0	0.586309		GO:0002576~platelet degranulation;GO:0003300~cardiac muscle hypertrophy;GO:0006936~muscle contraction;GO:0006941~striated muscle contraction;GO:0007076~mitotic chromosome condensation;GO:0018108~peptidyl-tyrosine phosphorylation;GO:0030049~muscle filament sliding;GO:0030240~skeletal muscle thin filament assembly;GO:0030241~skeletal muscle myosin thick filament assembly;GO:0035995~detection of mus…
>sp|O43707|ACTN4_HUMAN Alpha-actinin-4 OS=Homo sapiens OX=9606 GN=ACTN4 PE=1 SV=2S(461)	O43707	ACTN4	S(461)	LSDIKALIRKHEAFESDLAAHQDRVEQIAAI	Peptide10138		0.016295	-0.278093	-0.112824	0.0599525	0.113748		0	-0.235723	-0.0267009	-0.0401118	0.0433922		-0.0258691	-0.168283	-0.020339	-0.0383579	0.193999		0.095322	-0.021491	0.0835616	-0.16366	0.000404582			-0.197334	0.138123		-0.0405126	0.856882		-0.0669813	0.673695		0.066449	0.71093		0.539414	0	0	0		GO:0001666~response to hypoxia;GO:0002576~platelet degranulation;GO:0015031~protein transport;GO:0030050~vesicle transport along actin filament;GO:0030335~positive regulation of cell migration;GO:0032417~positive regulation of sodium:proton antiporter activity;GO:0035357~peroxisome proliferator activated receptor sigling pathway;GO:0042981~regulation of apoptotic process;GO:0048384~retinoic acid …
>sp|P54296|MYOM2_HUMAN Myomesin-2 OS=Homo sapiens OX=9606 GN=MYOM2 PE=1 SV=2S(19)	P54296	MYOM2	S(19)	VTVPFYQKRHRHFDQSYRNIQTRYLLDEYAS	Peptide10139		-0.118965	-0.0261562	0.0530954	0.0781044	-0.0420202		0	-0.0544595	0.278596	-0.037522	-0.109543		-0.19198	-0.0978853	0.312726	0.0496372	-0.141661		-0.029682	-0.133562	0.0501358	-0.000553817	0.0445595			0.00714093	0.968463		0.258795	0.0816207		0.107573	0.484045		0.0229904	0.914432		0	0.405959	0	0		GO:0006936~muscle contraction
>sp|P27816|MAP4_HUMAN Microtubule-associated protein 4 OS=Homo sapiens OX=9606 GN=MAP4 PE=1 SV=3T(521)	P27816	MAP4	T(521)	MSPLSETEMALGKDVTPPPETEVVLIKNVCL	Peptide1014		-0.620486	-0.435314	-0.00709528	-0.491421	0.0861144		0	-0.635648	-0.436297	-0.242114	-0.00658		-0.438697	-0.384116	0.0815929	-0.440774	0.284734		0.299046	-0.196627	-0.213647	-0.673504	0.00392449			-0.222892	0.456038		0.0461727	0.933139		-0.271919	0.381868		0.282082	0.402044		0	0.35215	0	0		GO:0007052~mitotic spindle organization;GO:0031175~neuron projection development;GO:0051012~microtubule sliding;GO:0051294~establishment of spindle orientation;GO:0051301~cell division;GO:1902856~negative regulation of nonmotile primary cilium assembly
>tr||A0A0C4DFM5|A0A0C4DFM5_HUMAN Myotilin; isoform CRA_b OS=Homo sapiens OX=9606 GN=MYOT PE=1 SV=1S(19)	A0A0C4DFM5	MYOT	S(19)	YERPKHFIQSQNPCGSRLQPPGPETSSFSSQ	Peptide10140		0.126095	-0.0797176	-0.399041	-0.42195	0.0912142		0	-0.0857455	-0.277937	-0.385562	-0.00443225		-0.166265	-0.315286	-0.118412	-0.19232	-0.132617		0.0857375	-0.0753247	-0.325452	-0.589033	0.0686067			-0.150411	0.390849		-0.291602	0.114474		-0.408608	0.032225		-0.00569906	0.983568		0	0	0	0.421975		GO:0006936~muscle contraction
>sp|Q13501|SQSTM_HUMAN Sequestosome-1 OS=Homo sapiens OX=9606 GN=SQSTM1 PE=1 SV=1S(207)	Q13501	SQSTM1	S(207)	HFGWPGWEMGPPGNWSPRPPRAGEARPGPTA	Peptide10141		-1.04436	-0.219273	-0.377	-0.982897	-0.615168		0						-0.312092	-0.278713	-0.422551	-0.762828	-0.900037									0.429235	0.307857		0.278453	0.612132		-0.194634	0.677967		-0.0793739	0.894999		0	0.466851	0	0		GO:0000122~negative regulation of transcription from R polymerase II promoter;GO:0000422~mitophagy;GO:0001934~positive regulation of protein phosphorylation;GO:0002376~immune system process;GO:0006468~protein phosphorylation;GO:0006511~ubiquitin-dependent protein catabolic process;GO:0006914~autophagy;GO:0006915~apoptotic process;GO:0006950~response to stress;GO:0008104~protein localization;GO:00…
>sp|Q8N1G0|ZN687_HUMAN Zinc finger protein 687 OS=Homo sapiens OX=9606 GN=ZNF687 PE=1 SV=1S(1057)	Q8N1G0	ZNF687	S(1057)	EKHVQVRHGLQLGAQSPGRGTTLARGSSARA	Peptide10142		-0.393764	-0.610744	-0.658382	-1.24891	-0.875402		0						-0.394918	-1.05318	-0.586452	-1.40219	-0.217385									-0.43762	0.293919		-0.228076	0.68566		-0.931207	0.0670405		-0.152053	0.788034		0	0	0	0.30184		D-templated;GO:0006351~transcription;GO:0006355~regulation of transcription
>sp|P54296|MYOM2_HUMAN Myomesin-2 OS=Homo sapiens OX=9606 GN=MYOM2 PE=1 SV=2S(601)	P54296	MYOM2	S(601)	LSANRHGLSEPSEITSPIQAQDVTVVPSAPG	Peptide10143		-1.51458	-0.960325	-0.542925	-0.889166	-1.11685		0						-0.515433	-0.607004	-0.741271	-1.24512	-0.390988									0.231343	0.739666		0.372909	0.656155		-0.0521372	0.94594		0.261086	0.748277		0	0.620124	0	0		GO:0006936~muscle contraction
>sp|P54296|MYOM2_HUMAN Myomesin-2 OS=Homo sapiens OX=9606 GN=MYOM2 PE=1 SV=2S(613)	P54296	MYOM2	S(613)	EITSPIQAQDVTVVPSAPGRVLASRNTKTSV	Peptide10144		0.345569	-2.05852	-0.588722	0.0340543	-0.324284		0						-1.17676	-0.197392	0.0428543	-1.02586	-0.430676									-0.712358	0.566928		0.142664	0.947752		-0.0803043	0.957069		0.0381173	0.983568		0.334484	0	0	0		GO:0006936~muscle contraction
>tr||Q5TCU3|Q5TCU3_HUMAN >tr|opomyosin beta chain OS=Homo sapiens OX=9606 GN=TPM2 PE=1 SV=1Y(162)	Q5TCU3	TPM2	Y(162)	QLKEAKHIAEDSDRKYEEVARKLVILEGELE	Peptide10145		-0.374971	-0.323527	0.0479095	-0.251805	-0.354681		0	0.213177	-0.0918953	0.203765	-0.923654		-0.405127	-0.191668	-0.355646	-0.0913068	0.125393		-0.345186	-0.109058	-0.0624457	-1.65556	0.570941			0.178552	0.779485		0.165802	0.852088		-0.167405	0.799909		0.135821	0.864442		0	0.581132	0	0		GO:0006936~muscle contraction;GO:0007015~actin filament organization;GO:0030049~muscle filament sliding;GO:0043462~regulation of ATPase activity
>sp|Q8WZ42|TITIN_HUMAN Titin OS=Homo sapiens OX=9606 GN=TTN PE=1 SV=4S(4538)	Q8WZ42	TTN	S(4538)	NWRISDAENKHILELSNLTIQDRGVYSCKAS	Peptide10146		-0.504697	-0.403454	-0.96898	-1.20659	-0.772689		0						-0.469104	-0.929843	-0.443457	-1.36607	-0.61956									-0.179748	0.678777		-0.219318	0.687747		-0.799426	0.0940421		-0.209224	0.674703		0	0.359378	0	0		GO:0002576~platelet degranulation;GO:0003300~cardiac muscle hypertrophy;GO:0006936~muscle contraction;GO:0006941~striated muscle contraction;GO:0007076~mitotic chromosome condensation;GO:0018108~peptidyl-tyrosine phosphorylation;GO:0030049~muscle filament sliding;GO:0030240~skeletal muscle thin filament assembly;GO:0030241~skeletal muscle myosin thick filament assembly;GO:0035995~detection of mus…
>sp|P20929|NEBU_HUMAN Nebulin OS=Homo sapiens OX=9606 GN=NEB PE=1 SV=5S(923)	P20929	NEB	S(923)	SQAIASDVDYKHILHSYSYPPDSINVDLAKK	Peptide10147		0.194778	0.201796	0.362358	-0.129561	0.449353		0	0.13982	0.240356	-0.0999539	0.457125		0.0417792	0.169724	0.381018	0.161493	0.372288		0.487443	0.501035	0.409421	-0.119672	0.0874546			0.0720938	0.760909		0.167288	0.514338		-0.227923	0.297112		0.160555	0.506828		0	0	0	0.436817		GO:0007517~muscle organ development;GO:0007525~somatic muscle development;GO:0030049~muscle filament sliding;GO:0030832~regulation of actin filament length
>sp|P20929|NEBU_HUMAN Nebulin OS=Homo sapiens OX=9606 GN=NEB PE=1 SV=5S(930)	P20929	NEB	S(930)	VDYKHILHSYSYPPDSINVDLAKKAYALQSD	Peptide10148		-0.894692	-0.820056	-0.431233	-0.480788	-1.10668		0						-0.654925	-0.578891	-0.21716	-1.12038	-0.545438									0.0753347	0.893485		0.450612	0.418979		-0.0257779	0.964811		-0.0512502	0.943141		0	0.572161	0	0		GO:0007517~muscle organ development;GO:0007525~somatic muscle development;GO:0030049~muscle filament sliding;GO:0030832~regulation of actin filament length
>sp|P20929|NEBU_HUMAN Nebulin OS=Homo sapiens OX=9606 GN=NEB PE=1 SV=5Y(924)	P20929	NEB	Y(924)	QAIASDVDYKHILHSYSYPPDSINVDLAKKA	Peptide10149		-0.0656692	0.110644	0.279304	-0.53027	0.439428		0	-0.170825	0.299278	0.0501659	0.172802		0.19922	-0.101828	0.298019	0.0509025	-0.0153686		-0.000212519	0.126777	0.458462	-0.298221	0.126465			-0.0421427	0.877823		0.300431	0.214905		-0.21519	0.361449		0.147497	0.581124		0	0.28677	0	0		GO:0007517~muscle organ development;GO:0007525~somatic muscle development;GO:0030049~muscle filament sliding;GO:0030832~regulation of actin filament length
>sp|O15439|MRP4_HUMAN Multidrug resistance-associated protein 4 OS=Homo sapiens OX=9606 GN=ABCC4 PE=1 SV=3T(646)	O15439	ABCC4	T(646)	LKKDNEESEQPPVPGTPTLRNRTFSESSVWS	Peptide1015		-0.0832744	-0.187015	-0.288779	-0.180013	-0.21749		0	-0.195792	-0.159461	-0.170441	-0.249049		-0.0511363	-0.2251	-0.200918	-0.270815	-0.231344		-0.227083	-0.412581	-0.215411	-0.116377	-0.109455			-0.164749	0.203069		-0.125769	0.433143		-0.0940382	0.524609		-0.111461	0.4787		0	0	0	0		GO:0002576~platelet degranulation;GO:0010243~response to organonitrogen compound;GO:0014070~response to organic cyclic compound;GO:0032310~prostaglandin secretion;GO:0042384~cilium assembly;GO:0042493~response to drug;GO:0048661~positive regulation of smooth muscle cell proliferation;GO:0055085~transmembrane transport;GO:0055114~oxidation-reduction process;GO:0098656~anion transmembrane transport
>sp|P20929|NEBU_HUMAN Nebulin OS=Homo sapiens OX=9606 GN=NEB PE=1 SV=5S(925)	P20929	NEB	S(925)	AIASDVDYKHILHSYSYPPDSINVDLAKKAY	Peptide10150		-0.225395	-0.170736	0.476912	-0.2244	0.427146		0	-0.384812	0.427104	0.00336833	0.275476		0.000518902	-0.229446	0.620717	-0.0737244	0.173379		0.0264482	0.165036	0.502473	-0.326301	0.240642			-0.105382	0.604988		0.556409	0.00819763		-0.105657	0.622355		0.328768	0.108067		0	0.387792	0	0		GO:0007517~muscle organ development;GO:0007525~somatic muscle development;GO:0030049~muscle filament sliding;GO:0030832~regulation of actin filament length
>sp|Q00872|MYPC1_HUMAN Myosin-binding protein C; slow-type OS=Homo sapiens OX=9606 GN=MYBPC1 PE=1 SV=2T(406)	Q00872	MYBPC1	T(406)	IRVEGKKHILIIEGATKADAAEYSVMTTGGQ	Peptide10151		-0.127369	0.0901608	0.0192044	-0.150049	-0.132546		0	0.0963709	-0.0760869	-0.0770934	-0.101555		-0.122518	0.156437	-0.0686212	-0.150613	-0.0750656		0.0238312	-0.144637	-0.245444	-0.00373995	0.0210245			0.106097	0.481681		-0.036223	0.883933		-0.0388599	0.826207		-0.0155217	0.948008		0	0	0	0		GO:0007155~cell adhesion;GO:0030049~muscle filament sliding;GO:1903955~positive regulation of protein targeting to mitochondrion
>sp|O75369|FLNB_HUMAN Filamin-B OS=Homo sapiens OX=9606 GN=FLNB PE=1 SV=2S(1902)	O75369	FLNB	S(1902)	DYSILVKYNDKHIPGSPFTAKITDDSRRCSQ	Peptide10152		-0.348615	-0.137548	0.820267	-0.677516	1.29089		0	-0.423697	0.780898	0.320724	0.660386		0.29496	0.728789	0.69661	-0.568279	0.80553		0.119654	0.768974	0.909594	-0.673022	0.727918			0.21763	0.646764		0.785343	0.0930029		-0.416022	0.376852		0.854682	0.0720115		0	0.402253	0	0		GO:0003334~keratinocyte development;GO:0003382~epithelial cell morphogenesis;GO:0007016~cytoskeletal anchoring at plasma membrane;GO:0007165~sigl transduction;GO:0007519~skeletal muscle tissue development;GO:0030036~actin cytoskeleton organization;GO:0030154~cell differentiation;GO:0098609~cell-cell adhesion
>sp|P20929|NEBU_HUMAN Nebulin OS=Homo sapiens OX=9606 GN=NEB PE=1 SV=5T(1517)	P20929	NEB	T(1517)	DLNYKVEGEKLKHKYTIDPELPQFIQAKV	Peptide10153		-1.06503	-0.575407	-0.717299	-1.11098	-0.901367		0						-0.299445	-0.916226	-0.232532	-1.36711	-0.592478									-0.0635768	0.919754		0.207324	0.779766		-0.556804	0.311994		-0.0646823	0.93346		0	0.616006	0	0		GO:0007517~muscle organ development;GO:0007525~somatic muscle development;GO:0030049~muscle filament sliding;GO:0030832~regulation of actin filament length
>sp|P20929|NEBU_HUMAN Nebulin OS=Homo sapiens OX=9606 GN=NEB PE=1 SV=5S(1275)	P20929	NEB	S(1275)	LYKAKGEDVKHKYTMSPDLPQFLQAKCYN	Peptide10154		0.0325944	-0.0918081	0.108405	-0.247614	0.274522		0	-0.187415	0.27782	0.229316	-0.0343073		0.0702119	0.130087	0.147362	-0.0509045	0.0859476		0.0847368	-0.0935752	0.305646	-0.0539206	0.0161862			-0.107564	0.562336		0.162922	0.441145		-0.0776665	0.706164		0.0387012	0.878811		0.354678	0	0	0		GO:0007517~muscle organ development;GO:0007525~somatic muscle development;GO:0030049~muscle filament sliding;GO:0030832~regulation of actin filament length
>sp|P20929|NEBU_HUMAN Nebulin OS=Homo sapiens OX=9606 GN=NEB PE=1 SV=5S(5664)	P20929	NEB	S(5664)	ENKYKDHVKKHLAQGSYTTLPETRDTVHVKE	Peptide10155		-0.207771	-0.059311	-0.130736	-0.355749	0.298537		0	-0.172671	-0.0349994	-0.193236	0.0898094		-0.161411	-0.0470515	0.0634744	0.000726305	0.0064378		0.212761	-0.048927	-0.0133712	-0.363204	0.103257			-0.0428851	0.843218		0.0101969	0.97553		-0.18876	0.325875		0.163615	0.432593		0	0.301882	0	0		GO:0007517~muscle organ development;GO:0007525~somatic muscle development;GO:0030049~muscle filament sliding;GO:0030832~regulation of actin filament length
>sp|Q00872|MYPC1_HUMAN Myosin-binding protein C; slow-type OS=Homo sapiens OX=9606 GN=MYBPC1 PE=1 SV=2T(848)	Q00872	MYBPC1	T(848)	IIEPPKIRIPRHLKQTYIRRVGEAVNLVIPF	Peptide10156		0.44333	0.662384	0.170577	0.525099	0.253226		0	0.836453	0.339358	0.536458	0.248886		-0.0570176	0.314597	0.239474	0.913499	0.0501999		0.00577105	0.236179	0.17197	0.530655	0.439084			0.414383	0.0722479		0.132324	0.692844		0.528407	0.0457687		0.149828	0.615213		0	0	0.385909	0		GO:0007155~cell adhesion;GO:0030049~muscle filament sliding;GO:1903955~positive regulation of protein targeting to mitochondrion
>sp|Q8WZ42|TITIN_HUMAN Titin OS=Homo sapiens OX=9606 GN=TTN PE=1 SV=4T(2662)	Q8WZ42	TTN	T(2662)	DSKGEWLRDGKHLPLTNNIRSESDGHKRRLI	Peptide10157		0.186149	-0.168888	-0.494216	-0.938277	-0.13566		0	-0.459173	-0.352391	-0.466103	-0.331791		-0.010682	-0.755535	-0.121728	-0.772794	-0.233243		-0.129038	-0.137686	-0.31173	-0.932227	-0.279702			-0.391928	0.0737866		-0.331624	0.190101		-0.788958	0.00759987		-0.256706	0.322531		0	0	0	0.575809		GO:0002576~platelet degranulation;GO:0003300~cardiac muscle hypertrophy;GO:0006936~muscle contraction;GO:0006941~striated muscle contraction;GO:0007076~mitotic chromosome condensation;GO:0018108~peptidyl-tyrosine phosphorylation;GO:0030049~muscle filament sliding;GO:0030240~skeletal muscle thin filament assembly;GO:0030241~skeletal muscle myosin thick filament assembly;GO:0035995~detection of mus…
>sp|Q14324|MYPC2_HUMAN Myosin-binding protein C; fast-type OS=Homo sapiens OX=9606 GN=MYBPC2 PE=1 SV=2Y(850)	Q14324	MYBPC2	Y(850)	AEPPKIRLPRHLRQTYIRKVGEQLNLVVPFQ	Peptide10158		0.926707	0.696715	0.325623	0.167811	0.322826		0	0.730689	0.382854	0.737565	0.267134		0.220766	0.123309	0.492411	0.444627	0.0613651		-0.321734	0.438932	0.636849	0.347142	0.252236			0.290977	0.40257		0.253	0.57154		0.217852	0.570008		0.0194557	0.972008		0	0	0	0.339		GO:0006936~muscle contraction;GO:0007155~cell adhesion;GO:0030049~muscle filament sliding
>sp|Q8WZ42|TITIN_HUMAN Titin OS=Homo sapiens OX=9606 GN=TTN PE=1 SV=4T(31309)	Q8WZ42	TTN	T(31309)	ERKETSTDKWVRHNKTQITTTMYTVTGLVPD	Peptide10159		-0.0423721	-0.392188	-1.033	-0.774276	-0.796697		0						-0.402104	-0.907368	-0.17238	-1.34349	-0.661683									-0.42754	0.466039		-0.380453	0.612132		-0.836646	0.194206		-0.506952	0.447968		0	0	0	0.598852		GO:0002576~platelet degranulation;GO:0003300~cardiac muscle hypertrophy;GO:0006936~muscle contraction;GO:0006941~striated muscle contraction;GO:0007076~mitotic chromosome condensation;GO:0018108~peptidyl-tyrosine phosphorylation;GO:0030049~muscle filament sliding;GO:0030240~skeletal muscle thin filament assembly;GO:0030241~skeletal muscle myosin thick filament assembly;GO:0035995~detection of mus…
>sp|Q14315|FLNC_HUMAN Filamin-C OS=Homo sapiens OX=9606 GN=FLNC PE=1 SV=3T(1506)	Q14315	FLNC	T(1506)	VEVRDNGDGTHTVHYTPATDGPYTVAVKYAD	Peptide1016		-0.479265	-0.634775	-0.845395	-0.972122	-0.866784		0						-0.278691	-0.959681	-0.496661	-0.954079	-0.607125									-0.41825	0.21104		-0.29205	0.48077		-0.584122	0.130386		-0.357977	0.355323		0	0	0	0.356816		GO:0034329~cell junction assembly;GO:0048747~muscle fiber development
>sp|P20929|NEBU_HUMAN Nebulin OS=Homo sapiens OX=9606 GN=NEB PE=1 SV=5S(6306)	P20929	NEB	S(6306)	TPEMERVKHNQENISSVLYKENVGKATATPV	Peptide10160		-1.30084	-0.759834	-0.438472	-0.904471	-0.544676		0						-0.551208	-0.44986	-0.0323155	-1.00501	-0.628638									0.321177	0.492573		0.69063	0.190848		-0.0287181	0.959841		0.339367	0.527485		0	0.743615	0	0		GO:0007517~muscle organ development;GO:0007525~somatic muscle development;GO:0030049~muscle filament sliding;GO:0030832~regulation of actin filament length
>sp|Q9ULL5|PRR12_HUMAN Proline-rich protein 12 OS=Homo sapiens OX=9606 GN=PRR12 PE=1 SV=2S(487)	Q9ULL5	PRR12	S(487)	KRHPPLYQAGLTPPLSPPKSVPPSVPARGLQ	Peptide10161		-0.93924	-0.975846	-0.488943	-1.42432	-0.755238		0						-0.674096	-0.787452	-0.790282	-0.890293	-0.490298									-0.0749814	0.873075		0.167056	0.766601		-0.35064	0.404274		0.1839	0.709141		0	0.77756	0	0
>sp|Q8N3V7|SYNPO_HUMAN Syptopodin OS=Homo sapiens OX=9606 GN=SYNPO PE=1 SV=2S(232)	Q8N3V7	SYNPO	S(232)	LSSTSLPEPGPPRHPSPQSPDRGVPGHSMEG	Peptide10162		-0.301712	-0.880453	0.14854	0.71294	-0.391404		0	-0.440057	-0.387218	-0.150877	0.0798894		0.218341	0.00888803	-0.762254	-0.0655659	0.450712		0.213822	-0.290877	-0.434565	0.316196	-0.0197598			-0.433238	0.265529		-0.391487	0.405529		0.17056	0.714082		-0.00275351	0.995757		0.512196	0	0	0		GO:0032233~positive regulation of actin filament bundle assembly;GO:0051492~regulation of stress fiber assembly
>sp|Q9HCN4|GPN1_HUMAN GPN-loop GTPase 1 OS=Homo sapiens OX=9606 GN=GPN1 PE=1 SV=1S(30)	Q9HCN4	GPN1	S(30)	GPRHPVCLLVLGMAGSGKTTFVQRLTGHLHA	Peptide10163		-1.37145	-0.705472	-0.593679	-1.49157	-0.698936		0						-0.526408	-0.268508	-0.379723	-1.86398	-0.405457									0.46194	0.381291		0.462228	0.470347		-0.728844	0.213289		0.396733	0.516734		0	0.56659	0	0		GO:0044376~R polymerase II complex import to nucleus;GO:1990022~R polymerase III complex localization to nucleus
>sp|P17661|DESM_HUMAN Desmin OS=Homo sapiens OX=9606 GN=DES PE=1 SV=3S(330)	P17661	DES	S(330)	RQAKQEMMEYRHQIQSYTCEIDALKGTNDSL	Peptide10164		-0.128125	0.116699	0.225963	0.172027	0.283119		0	0.00078999	0.0995536	0.200552	0.354649		0.157093	0.127397	0.0966886	0.095084	0.316154		-0.0736339	0.220839	0.158184	0.296699	0.224792			0.127598	0.360826		0.156264	0.32181		0.202257	0.172467		0.305845	0.0439216		0	0	0.51236	0		GO:0006936~muscle contraction;GO:0007010~cytoskeleton organization;GO:0008016~regulation of heart contraction;GO:0030049~muscle filament sliding;GO:0045109~intermediate filament organization
>sp|Q8WZ42|TITIN_HUMAN Titin OS=Homo sapiens OX=9606 GN=TTN PE=1 SV=4S(13888)	Q8WZ42	TTN	S(13888)	RNNMVVVQGDKHQMMSEGKIHRLQICDIKPR	Peptide10165		-0.176619	0.0783753	-0.169655	0.338247	0.162068		0	-0.115443	0.123181	0.0519742	0.212024		0.323756	-0.253124	-0.101544	0.282391	0.0340783		-0.377927	0.121816	0.0755347	0.357214	0.139547			0.0156035	0.957256		0.0395765	0.924189		0.315154	0.184012		0.194627	0.453846		0	0	0.409628	0		GO:0002576~platelet degranulation;GO:0003300~cardiac muscle hypertrophy;GO:0006936~muscle contraction;GO:0006941~striated muscle contraction;GO:0007076~mitotic chromosome condensation;GO:0018108~peptidyl-tyrosine phosphorylation;GO:0030049~muscle filament sliding;GO:0030240~skeletal muscle thin filament assembly;GO:0030241~skeletal muscle myosin thick filament assembly;GO:0035995~detection of mus…
>sp|P35609|ACTN2_HUMAN Alpha-actinin-2 OS=Homo sapiens OX=9606 GN=ACTN2 PE=1 SV=1S(201)	P35609	ACTN2	S(201)	LCALIHRHRPDLIDYSKLNKDDPIGNINLAM	Peptide10166		-0.589259	-0.608564	0.195526	0.570932	-0.290738		0	-0.324068	-0.139579	-0.092973	-0.0379752		-0.300209	0.121793	-0.0540879	0.180869	-0.00873515		0.189612	-0.503878	0.0237974	0.358854	-0.139858			-0.153715	0.635691		0.181378	0.658752		0.429384	0.182281		0.0556375	0.900764		0	0	0.344533	0		GO:0000165~MAPK cascade;GO:0002576~platelet degranulation;GO:0007155~cell adhesion;GO:0030035~microspike assembly;GO:0030049~muscle filament sliding;GO:0042391~regulation of membrane potential;GO:0042981~regulation of apoptotic process;GO:0043267~negative regulation of potassium ion transport;GO:0043268~positive regulation of potassium ion transport;GO:0043547~positive regulation of GTPase activi…
>sp|Q8WZ42|TITIN_HUMAN Titin OS=Homo sapiens OX=9606 GN=TTN PE=1 SV=4S(24105)	Q8WZ42	TTN	S(24105)	IQYIVEMQAKHSEKWSECARVKSLQAVITNL	Peptide10167		0.191952	0.362295	0.0349673	-0.0516755	-0.320865		0	0.0696063	0.17958	0.36066	-0.142765		-0.0981813	-0.127207	0.229722	-0.549559	-0.0507679		-0.528408	-0.617518	-0.541397	0.825083	0.108009			0.0304531	0.957649		0.0843774	0.917887		0.254786	0.607726		0.00706196	0.992519		0	0	0.422369	0		GO:0002576~platelet degranulation;GO:0003300~cardiac muscle hypertrophy;GO:0006936~muscle contraction;GO:0006941~striated muscle contraction;GO:0007076~mitotic chromosome condensation;GO:0018108~peptidyl-tyrosine phosphorylation;GO:0030049~muscle filament sliding;GO:0030240~skeletal muscle thin filament assembly;GO:0030241~skeletal muscle myosin thick filament assembly;GO:0035995~detection of mus…
>sp|Q2TAL5|SMTL2_HUMAN Smoothelin-like protein 2 OS=Homo sapiens OX=9606 GN=SMTNL2 PE=2 SV=1S(269);T(274)	Q2TAL5	SMTNL2	S(269);T(274)	PSSGYGAVTASKHSNSPPLVTPPQSPVSPQP;GAVTASKHSNSPPLVTPPQSPVSPQPPAITQ	Peptide10168		-1.24319	-1.06513	-0.51999	-1.05943	-0.526211		0						0.0862175	-0.761057	-0.990081	-0.133571	-0.950003									-0.334608	0.69979		-0.176552	0.897343		-0.0180154	0.985666		-0.159623	0.887371		0	0	0.516352	0
>sp|Q86TC9|MYPN_HUMAN Myopalladin OS=Homo sapiens OX=9606 GN=MYPN PE=1 SV=2S(108)	Q86TC9	MYPN	S(108)	ETQARKRLSPDQMKHSPNLSFEPNFCQDNPR	Peptide10169		-1.16564	-0.742163	-0.13326	-1.14254	-0.205624		0						-0.655061	-0.653488	-0.233221	-0.803683	-0.228069									0.212527	0.560031		0.727112	0.0798034		-0.0627575	0.881848		0.693505	0.097408		0	0.805	0	0		GO:0045214~sarcomere organization
>sp|Q9NZZ3|CHMP5_HUMAN Charged multivesicular body protein 5 OS=Homo sapiens OX=9606 GN=CHMP5 PE=1 SV=1S(86)	Q9NZZ3	CHMP5	S(86)	QKRMYEQQRDNLAQQSFNMEQANYTIQSLKD	Peptide1017		-0.0140166	-1.15032	-0.557005	-0.65706	-0.831535		0						-0.623919	-0.644938	-0.578597	-0.499912	-0.844406									-0.57866	0.165435		-0.248833	0.653342		-0.259518	0.570716		-0.519003	0.275444		0.490444	0	0	0		GO:0000920~cell separation after cytokinesis;GO:0001919~regulation of receptor recycling;GO:0006997~nucleus organization;GO:0007040~lysosome organization;GO:0007080~mitotic metaphase plate congression;GO:0008333~endosome to lysosome transport;GO:0010824~regulation of centrosome duplication;GO:0015031~protein transport;GO:0016197~endosomal transport;GO:0019058~viral life cycle;GO:0036258~multivesi…
>sp|Q86TC9|MYPN_HUMAN Myopalladin OS=Homo sapiens OX=9606 GN=MYPN PE=1 SV=2S(124)	Q86TC9	MYPN	S(124)	PNLSFEPNFCQDNPRSPTSSKESPQEAKRPQ	Peptide10170		-0.711617	0.513539	0.925171	-1.5613	0.918155		0	-0.0942723	0.605789	0.0797692	0.287491		-0.700264	0.584464	1.35481	-1.02194	0.557511		0.206435	0.0435985	0.682807	-0.895193	0.588834			0.563194	0.24368		1.1935	0.0237889		-0.548306	0.300432		0.88936	0.0957883		0	0.511539	0	0		GO:0045214~sarcomere organization
>sp|Q6P5Q4|LMOD2_HUMAN Leiomodin-2 OS=Homo sapiens OX=9606 GN=LMOD2 PE=1 SV=2S(400)	Q6P5Q4	LMOD2	S(400)	PSSSPYVSPRHSPWSSPKLPKKVQTVRSRPL	Peptide10171		0.206726	-0.0350043	-0.567003	-0.454466	0.0159474		0	-0.22262	-0.0776228	0.0505351	-0.31815		-0.188399	-0.211999	-0.230211	-0.458626	0.282734		0.148403	-0.497426	-0.436795	-0.108094	-0.0839247			-0.283445	0.268433		-0.369591	0.197188		-0.284345	0.307302		-0.0675307	0.856434		0	0	0	0.40553		GO:0006936~muscle contraction;GO:0007015~actin filament organization;GO:0030041~actin filament polymerization;GO:0030239~myofibril assembly;GO:0030838~positive regulation of actin filament polymerization;GO:0045010~actin nucleation;GO:0045214~sarcomere organization;GO:0051694~pointed-end actin filament capping
>sp|Q9NR12|PDLI7_HUMAN PDZ and LIM domain protein 7 OS=Homo sapiens OX=9606 GN=PDLIM7 PE=1 SV=1T(251)	Q9NR12	PDLIM7	T(251)	PDKTSTVLTRHSQPATPTPLQSRTSIVQAAA	Peptide10172		0.194553	1.01043	-0.222069	-0.203627	-0.758501		0	0.798999	-0.290166	-0.878137	-0.175857		-0.221177	-0.320584	0.17742	-0.498798	-0.101034		-0.138507	0.595718	-0.324857	-0.207756	-0.481034			0.562425	0.141586		-0.123635	0.847108		-0.405797	0.341604		-0.337824	0.471618		0	0	0	0.326243		GO:0001503~ossification;GO:0006898~receptor-mediated endocytosis;GO:0007275~multicellular organism development;GO:0030036~actin cytoskeleton organization;GO:0030154~cell differentiation;GO:0045669~positive regulation of osteoblast differentiation
>sp|Q0VAK6|LMOD3_HUMAN Leiomodin-3 OS=Homo sapiens OX=9606 GN=LMOD3 PE=1 SV=1S(546)	Q0VAK6	LMOD3	S(546)	EITPRDQLLNDIRHSSVAYLKPVQLPKELA_	Peptide10173		-0.615923	-1.65807	-1.56008	-1.04277	-1.39692		0	-1.70707	-1.20752	-1.23671	-1.58297		-0.442375	-1.52301	-1.19032	-1.39578	-1.2093		-0.18976	-1.87728	-1.42796	-1.2384	-1.19087			-1.37934	1.53e-05		-1.03445	0.000597646		-0.916401	0.00720924		-1.033	0.000967722		0.476507	0	0	0		GO:0006936~muscle contraction;GO:0007015~actin filament organization;GO:0030239~myofibril assembly;GO:0051694~pointed-end actin filament capping
>tr||G5EA03|G5EA03_HUMAN LIM and calponin homology domains-containing protein 1 OS=Homo sapiens OX=9606 GN=LIMCH1 PE=1 SV=1T(666)	G5EA03	LIMCH1	T(666)	KDDMMARRTGMSLRHTGSNPNQFLPVPFAKQ	Peptide10174		-1.29157	-0.335467	-0.485111	-0.436126	-1.75946		0						-0.306172	-0.485553	-0.39049	-1.30694	-1.32238									0.38836	0.562893		0.361069	0.679227		-0.0726609	0.927104		-0.742053	0.31574		0	0	0.362007	0		GO:0031032~actomyosin structure organization
>sp|O43707|ACTN4_HUMAN Alpha-actinin-4 OS=Homo sapiens OX=9606 GN=ACTN4 PE=1 SV=2Y(727)	O43707	ACTN4	Y(727)	QLIQEALIFDNKHTNYTMEHIRVGWEQLLTT	Peptide10175		0.0339509	-0.145427	0.0004245	0.246068	-0.194294		0	0.131694	0.000513523	-0.0534451	-0.139884		-0.0300345	0.318364	-0.0177788	-0.0574908	-0.228701		-0.123481	0.0184728	0.199481	0.0203357	-0.160872			0.110667	0.529317		0.0755512	0.758258		0.068758	0.730006		-0.151046	0.439456		0	0	0.28354	0		GO:0001666~response to hypoxia;GO:0002576~platelet degranulation;GO:0015031~protein transport;GO:0030050~vesicle transport along actin filament;GO:0030335~positive regulation of cell migration;GO:0032417~positive regulation of sodium:proton antiporter activity;GO:0035357~peroxisome proliferator activated receptor sigling pathway;GO:0042981~regulation of apoptotic process;GO:0048384~retinoic acid …
>sp|O43707|ACTN4_HUMAN Alpha-actinin-4 OS=Homo sapiens OX=9606 GN=ACTN4 PE=1 SV=2T(728)	O43707	ACTN4	T(728)	LIQEALIFDNKHTNYTMEHIRVGWEQLLTTI	Peptide10176		-0.306311	0.148383	-0.00116812	0.556315	-0.163286		0	0.223598	-0.00394827	-0.0955008	0.114309		0.22692	0.667318	-0.188242	-0.321398	0.230266		-0.292239	0.504941	0.0656394	0.48433	-0.118706			0.478968	0.106275		0.0609778	0.91446		0.248844	0.457767		0.108553	0.802334		0	0	0.447943	0		GO:0001666~response to hypoxia;GO:0002576~platelet degranulation;GO:0015031~protein transport;GO:0030050~vesicle transport along actin filament;GO:0030335~positive regulation of cell migration;GO:0032417~positive regulation of sodium:proton antiporter activity;GO:0035357~peroxisome proliferator activated receptor sigling pathway;GO:0042981~regulation of apoptotic process;GO:0048384~retinoic acid …
>sp|Q8WZ42|TITIN_HUMAN Titin OS=Homo sapiens OX=9606 GN=TTN PE=1 SV=4T(22301)	Q8WZ42	TTN	T(22301)	PPGKPVPLNITRHTVTLKWAKPEYTGGFKIT	Peptide10177		-1.41137	-0.900742	-0.790898	-0.882422	-0.76374		0						-0.713741	-1.00236	-0.331795	-0.869986	-0.287881									0.111003	0.841939		0.50121	0.373072		0.186352	0.733469		0.536746	0.324634		0	0.544238	0	0		GO:0002576~platelet degranulation;GO:0003300~cardiac muscle hypertrophy;GO:0006936~muscle contraction;GO:0006941~striated muscle contraction;GO:0007076~mitotic chromosome condensation;GO:0018108~peptidyl-tyrosine phosphorylation;GO:0030049~muscle filament sliding;GO:0030240~skeletal muscle thin filament assembly;GO:0030241~skeletal muscle myosin thick filament assembly;GO:0035995~detection of mus…
>sp|Q08043|ACTN3_HUMAN Alpha-actinin-3 OS=Homo sapiens OX=9606 GN=ACTN3 PE=1 SV=2S(723)	Q08043	ACTN3	S(723)	LLQESLVFDNKHTVYSMEHIRVGWEQLLTSI	Peptide10178		-0.118491	0.103997	-0.571564	-1.4928	-0.36239		0						-0.437493	-1.47497	-0.260112	-0.441247	0.0380096									-0.407494	0.669988		-0.137846	0.933136		-0.689033	0.476456		0.115802	0.931913		0	0.274822	0	0		GO:0006936~muscle contraction;GO:0014728~regulation of the force of skeletal muscle contraction;GO:0014732~skeletal muscle atrophy;GO:0014883~transition between fast and slow fiber;GO:0014894~response to denervation involved in regulation of muscle adaptation;GO:0030049~muscle filament sliding;GO:0031448~positive regulation of fast-twitch skeletal muscle fiber contraction;GO:0042981~regulation of…
>sp|Q8WZ42|TITIN_HUMAN Titin OS=Homo sapiens OX=9606 GN=TTN PE=1 SV=4T(21461)	Q8WZ42	TTN	T(21461)	WTVVSEDIQSCRHVATKLIQGNEYIFRVSAV	Peptide10179		0.67337	0.467828	0.102897	0.0141482	0.0646081		0	0.450287	-0.00715907	0.395534	0.142833		-0.122977	0.253209	0.389591	0.208899	-0.194497		0.164408	0.145532	0.126653	0.466156	-0.175892			0.150514	0.592195		-0.0257048	0.956966		0.0924839	0.768262		-0.219437	0.477456		0	0	0	0.430086		GO:0002576~platelet degranulation;GO:0003300~cardiac muscle hypertrophy;GO:0006936~muscle contraction;GO:0006941~striated muscle contraction;GO:0007076~mitotic chromosome condensation;GO:0018108~peptidyl-tyrosine phosphorylation;GO:0030049~muscle filament sliding;GO:0030240~skeletal muscle thin filament assembly;GO:0030241~skeletal muscle myosin thick filament assembly;GO:0035995~detection of mus…
>sp|Q6ZNJ1|NBEL2_HUMAN Neurobeachin-like protein 2 OS=Homo sapiens OX=9606 GN=NBEAL2 PE=1 SV=2T(1867)	Q6ZNJ1	NBEAL2	T(1867)	LEASALRDNLGEVPLTPTEEASLPLAVTKEA	Peptide1018		-1.10973	-0.684659	-0.194206	-0.82629	-0.706933		0						-1.15435	-0.926912	0.365662	-0.517624	-0.62701									0.326255	0.388088		1.21777	0.0153102		0.460084	0.265708		0.465069	0.276215		0	0.582621	0	0		GO:0030220~platelet formation
>sp|D6RIA3|CD054_HUMAN Uncharacterized protein C4orf54 OS=Homo sapiens OX=9606 GN=C4orf54 PE=2 SV=1T(733)	D6RIA3	C4orf54	T(733)	EFVVSKVEGEIKHVETPLCFQKQVQTGSRVV	Peptide10180		0.214643	-0.0448195	0.345243	0.0978697	1.04461		0	0.107542	0.143851	0.244019	0.968281		0.797659	0.410585	-0.390519	0.478691	0.6514		0.0182937	0.663649	0.403897	-0.0501886	0.821647			0.02659	0.953433		-0.132031	0.802339		-0.0650513	0.878092		0.613835	0.0970606		0.32214	0	0	0		GO:0045149~acetoin metabolic process
>sp|P05976|MYL1_HUMAN Myosin light chain 1/3; skeletal muscle isoform OS=Homo sapiens OX=9606 GN=MYL1 PE=2 SV=3T(158)	P05976	MYL1	T(158)	GNGTVMGAELRHVLATLGEKMKEEEVEALMA	Peptide10181		-0.698277	-0.76639	-0.705652	-1.00562	-0.80973		0						-0.68928	-0.820672	-0.485166	-0.803136	-0.466651									-0.0997519	0.766899		0.0983701	0.831735		-0.210597	0.516908		0.0555883	0.896629		0	0.792896	0	0		GO:0006936~muscle contraction;GO:0030049~muscle filament sliding;GO:0060048~cardiac muscle contraction
>sp|P08590|MYL3_HUMAN Myosin light chain 3 OS=Homo sapiens OX=9606 GN=MYL3 PE=1 SV=3T(159)	P08590	MYL3	T(159)	GNGTVMGAELRHVLATLGERLTEDEVEKLMA	Peptide10182		-0.480887	-0.115096	-0.730416	-0.742538	-0.529148		0	-0.38532	-0.830563	-0.893042	-0.316642		0.0173269	-0.219031	-0.737183	-1.03731	-0.198602		-0.224639	-0.489648	-0.541397	-0.241688	-0.66119			-0.130224	0.656833		-0.53784	0.0591616		-0.556594	0.0569141		-0.254346	0.41791		0	0	0	0.39377		GO:0002026~regulation of the force of heart contraction;GO:0006942~regulation of striated muscle contraction;GO:0007519~skeletal muscle tissue development;GO:0030049~muscle filament sliding;GO:0032781~positive regulation of ATPase activity;GO:0055010~ventricular cardiac muscle tissue morphogenesis;GO:0060048~cardiac muscle contraction
>sp|P08590|MYL3_HUMAN Myosin light chain 3 OS=Homo sapiens OX=9606 GN=MYL3 PE=1 SV=3T(165)	P08590	MYL3	T(165)	GAELRHVLATLGERLTEDEVEKLMAGQEDSN	Peptide10183		-0.871934	0.028991	-0.0545941	-0.162467	-0.532643		0	-0.059831	-0.902908	-0.93638	0.0905042		-0.170215	-0.275959	-0.310233	-0.29033	-0.285254		-0.121749	0.192894	-0.354263	-0.396277	-0.325045			0.262498	0.48293		-0.114525	0.844803		-0.155389	0.714082		0.0278654	0.961502		0	0	0.422359	0		GO:0002026~regulation of the force of heart contraction;GO:0006942~regulation of striated muscle contraction;GO:0007519~skeletal muscle tissue development;GO:0030049~muscle filament sliding;GO:0032781~positive regulation of ATPase activity;GO:0055010~ventricular cardiac muscle tissue morphogenesis;GO:0060048~cardiac muscle contraction
>sp|Q14315|FLNC_HUMAN Filamin-C OS=Homo sapiens OX=9606 GN=FLNC PE=1 SV=3S(2027)	Q14315	FLNC	S(2027)	EHVVSVRKSGKHVTNSPFKILVGPSEIGDAS	Peptide10184		0.373038	-0.292663	0.449952	-0.335463	1.21783		0	-0.150525	0.471497	0.0277843	0.884554		0.215736	0.311977	0.416867	-0.0342449	0.710862		0.357225	0.434299	0.757372	-0.578191	0.723621			-0.160728	0.608043		0.287422	0.406556		-0.466529	0.13352		0.647718	0.0423861		0	0	0	0.298585		GO:0034329~cell junction assembly;GO:0048747~muscle fiber development
>tr||A0A087X1N7|A0A087X1N7_HUMAN Nebulin OS=Homo sapiens OX=9606 GN=NEB PE=1 SV=1S(5548)	A0A087X1N7	NEB	S(5548)	ALASDVDYRHYLHRWSCFPDQNDVIQARKAY	Peptide10185		0.875984	-0.552754	-0.774297	-1.32619	-1.02856		0						-0.436345	-0.973332	-0.0215707	-1.65923	-0.622685									-0.982863	0.19236		-0.617754	0.510388		-1.71253	0.0638424		-1.04544	0.227672		0	0	0	0.717831
>sp|Q8WZ42|TITIN_HUMAN Titin OS=Homo sapiens OX=9606 GN=TTN PE=1 SV=4S(19470)	Q8WZ42	TTN	S(19470)	IIGYVVEMRPKIADASPDEGWKRCAAQLV	Peptide10186		0.696688	0.0709419	-0.123645	-0.112261	0.015306		0	-0.0710095	-0.141979	-0.0186389	0.177949		0.0728737	-0.281948	0.310064	-0.183927	-0.274275		0.0842318	0.292903	-0.05588	0.0884603	-0.32872			-0.210726	0.462499		-0.216308	0.540014		-0.27004	0.364182		-0.315883	0.308241		0	0	0	0.684524		GO:0002576~platelet degranulation;GO:0003300~cardiac muscle hypertrophy;GO:0006936~muscle contraction;GO:0006941~striated muscle contraction;GO:0007076~mitotic chromosome condensation;GO:0018108~peptidyl-tyrosine phosphorylation;GO:0030049~muscle filament sliding;GO:0030240~skeletal muscle thin filament assembly;GO:0030241~skeletal muscle myosin thick filament assembly;GO:0035995~detection of mus…
>sp|Q8WZ42|TITIN_HUMAN Titin OS=Homo sapiens OX=9606 GN=TTN PE=1 SV=4S(22443)	Q8WZ42	TTN	S(22443)	ELEGTAKLEIKIADFSTNLVNKDSTRRDSGA	Peptide10187		0.436435	0.106586	-0.0268997	-0.2103	-0.244475		0	0.177197	0.104176	-0.173132	-0.174833		-0.0553692	-0.0452003	0.0394569	-0.0964021	-0.230736		0.160138	-0.323041	-0.124198	0.0997729	-0.213251			-0.156416	0.452663		-0.137167	0.60826		-0.230316	0.285642		-0.351125	0.106582		0	0	0	0.677813		GO:0002576~platelet degranulation;GO:0003300~cardiac muscle hypertrophy;GO:0006936~muscle contraction;GO:0006941~striated muscle contraction;GO:0007076~mitotic chromosome condensation;GO:0018108~peptidyl-tyrosine phosphorylation;GO:0030049~muscle filament sliding;GO:0030240~skeletal muscle thin filament assembly;GO:0030241~skeletal muscle myosin thick filament assembly;GO:0035995~detection of mus…
>sp|Q8WZ42|TITIN_HUMAN Titin OS=Homo sapiens OX=9606 GN=TTN PE=1 SV=4S(6377)	Q8WZ42	TTN	S(6377)	VKAGDSSRLECKIAGSPEIRVVWFRNEHELP	Peptide10188		-0.146119	-0.185848	0.0496813	-0.117378	0.0194515		0	-0.245281	-0.0315751	-0.0690487	-0.00737617		-0.0816913	-0.116901	0.125506	-0.159019	-0.0469092		0.016829	-0.0376073	0.00807346	-0.176603	-0.0270809			-0.0936639	0.465775		0.0906669	0.575675		-0.0777669	0.57692		0.0372667	0.830539		0	0	0	0		GO:0002576~platelet degranulation;GO:0003300~cardiac muscle hypertrophy;GO:0006936~muscle contraction;GO:0006941~striated muscle contraction;GO:0007076~mitotic chromosome condensation;GO:0018108~peptidyl-tyrosine phosphorylation;GO:0030049~muscle filament sliding;GO:0030240~skeletal muscle thin filament assembly;GO:0030241~skeletal muscle myosin thick filament assembly;GO:0035995~detection of mus…
>sp|Q96PB8|LRC3B_HUMAN Leucine-rich repeat-containing protein 3B OS=Homo sapiens OX=9606 GN=LRRC3B PE=1 SV=1T(152)	Q96PB8	LRRC3B	T(152)	KARARIANNPWHCDCTLQQVLRSMASNHETA	Peptide10189		-0.682438	-0.669242	-0.482926	-1.15595	-0.57507		0						-0.563052	-0.539903	-0.466967	-1.24307	-0.102038									0.0181723	0.96251		0.147799	0.737885		-0.576765	0.1138		0.284191	0.437253		0	0.557637	0	0
>sp|Q8NB12|SMYD1_HUMAN Histone-lysine N-methyl>tr|ansferase SMYD1 OS=Homo sapiens OX=9606 GN=SMYD1 PE=1 SV=1S(298)	Q8NB12	SMYD1	S(298)	LKDDLFLGVKDNPKPSQEVVKEMIQFSKDTL	Peptide1019		0.0317382	0.117026	0.0711758	0.123191	0.130153		0	-0.0131393	-0.202622	0.0187625	0.347987		0.254682	-0.0894563	-0.0456596	0.183052	0.0535065		-0.0159185	0.373345	0.0813675	0.203479	-0.0558447			0.0293184	0.904044		-0.0915599	0.741043		0.0644957	0.779194		0.0513251	0.849541		0	0	0	0		D-templated;GO:0006338~chromatin remodeling;GO:0006351~transcription;GO:0007507~heart development;GO:0010831~positive regulation of myotube differentiation;GO:0034968~histone lysine methylation;GO:0035914~skeletal muscle cell differentiation;GO:0045663~positive regulation of myoblast differentiation;GO:0045892~negative regulation of transcription
>sp|Q8WZ42|TITIN_HUMAN Titin OS=Homo sapiens OX=9606 GN=TTN PE=1 SV=4Y(20395)	Q8WZ42	TTN	Y(20395)	IEGHEYQFRICAENKYGVGDPVFTEPAIAKN	Peptide10190		1.07761	0.15933	-0.658374	-1.35277	-1.24081		0						-0.536204	-0.708177	0.0858251	-1.2797	-1.17367									-0.545127	0.553327		-0.556979	0.633856		-1.58694	0.123058		-1.47794	0.149322		0	0	0	0.680577		GO:0002576~platelet degranulation;GO:0003300~cardiac muscle hypertrophy;GO:0006936~muscle contraction;GO:0006941~striated muscle contraction;GO:0007076~mitotic chromosome condensation;GO:0018108~peptidyl-tyrosine phosphorylation;GO:0030049~muscle filament sliding;GO:0030240~skeletal muscle thin filament assembly;GO:0030241~skeletal muscle myosin thick filament assembly;GO:0035995~detection of mus…
>sp|Q8WZ42|TITIN_HUMAN Titin OS=Homo sapiens OX=9606 GN=TTN PE=1 SV=4T(26018)	Q8WZ42	TTN	T(26018)	FRICAINSEGVGEPATLPGSVVAQERIEPPE	Peptide10191		-0.366303	0.0852486	-0.290685	-0.210555	-0.198151		0	-0.283679	-0.725626	-0.450037	0.194455		0.225795	-0.622719	-0.382503	-0.212431	-0.121267		-0.275364	0.242534	-0.434416	-0.126816	-0.20765			-0.040686	0.9121		-0.35434	0.276457		-0.145992	0.662051		0.0208146	0.964567		0	0	0.273563	0		GO:0002576~platelet degranulation;GO:0003300~cardiac muscle hypertrophy;GO:0006936~muscle contraction;GO:0006941~striated muscle contraction;GO:0007076~mitotic chromosome condensation;GO:0018108~peptidyl-tyrosine phosphorylation;GO:0030049~muscle filament sliding;GO:0030240~skeletal muscle thin filament assembly;GO:0030241~skeletal muscle myosin thick filament assembly;GO:0035995~detection of mus…
>sp|Q8WZ42|TITIN_HUMAN Titin OS=Homo sapiens OX=9606 GN=TTN PE=1 SV=4S(26022)	Q8WZ42	TTN	S(26022)	AINSEGVGEPATLPGSVVAQERIEPPEIELD	Peptide10192		0.202153	0.130132	0.158099	0.0902722	-0.0976225		0	0.365913	0.0554871	-0.272615	0.0948755		0.0929842	0.192928	-0.0430147	0.0324606	-0.0814974		0.0396702	0.293707	-0.0450172	-0.151825	0.101164			0.161968	0.318011		-0.0523135	0.842949		-0.159129	0.361376		-0.079472	0.703637		0	0	0	0.440989		GO:0002576~platelet degranulation;GO:0003300~cardiac muscle hypertrophy;GO:0006936~muscle contraction;GO:0006941~striated muscle contraction;GO:0007076~mitotic chromosome condensation;GO:0018108~peptidyl-tyrosine phosphorylation;GO:0030049~muscle filament sliding;GO:0030240~skeletal muscle thin filament assembly;GO:0030241~skeletal muscle myosin thick filament assembly;GO:0035995~detection of mus…
>sp|Q08043|ACTN3_HUMAN Alpha-actinin-3 OS=Homo sapiens OX=9606 GN=ACTN3 PE=1 SV=2S(602)	Q08043	ACTN3	S(602)	GEIQKICQTYGLRPCSTNPYITLSPQDINTK	Peptide10193		0.243509	-0.235643	-0.132706	-1.59952	-0.502086		0						-0.745297	-1.54557	-0.337178	-0.502291	0.37102									-0.639711	0.520492		0.0159518	0.993007		-0.800011	0.441761		0.185361	0.893571		0.297606	0	0	0		GO:0006936~muscle contraction;GO:0014728~regulation of the force of skeletal muscle contraction;GO:0014732~skeletal muscle atrophy;GO:0014883~transition between fast and slow fiber;GO:0014894~response to denervation involved in regulation of muscle adaptation;GO:0030049~muscle filament sliding;GO:0031448~positive regulation of fast-twitch skeletal muscle fiber contraction;GO:0042981~regulation of…
>sp|Q08043|ACTN3_HUMAN Alpha-actinin-3 OS=Homo sapiens OX=9606 GN=ACTN3 PE=1 SV=2S(610)	Q08043	ACTN3	S(610)	TYGLRPCSTNPYITLSPQDINTKWDMVRKLV	Peptide10194		0.958139	0.346611	-0.603698	-1.8289	-0.695653		0						-0.527128	-1.23345	-0.186458	-0.93254	-0.111509									-0.658926	0.559998		-0.610583	0.677561		-1.59623	0.193336		-0.619086	0.640422		0	0	0	0.628615		GO:0006936~muscle contraction;GO:0014728~regulation of the force of skeletal muscle contraction;GO:0014732~skeletal muscle atrophy;GO:0014883~transition between fast and slow fiber;GO:0014894~response to denervation involved in regulation of muscle adaptation;GO:0030049~muscle filament sliding;GO:0031448~positive regulation of fast-twitch skeletal muscle fiber contraction;GO:0042981~regulation of…
>sp|Q08043|ACTN3_HUMAN Alpha-actinin-3 OS=Homo sapiens OX=9606 GN=ACTN3 PE=1 SV=2T(608)	Q08043	ACTN3	T(608)	CQTYGLRPCSTNPYITLSPQDINTKWDMVRK	Peptide10195		0.487517	0.195926	-0.949488	-2.02001	-1.09869		0						-0.541533	-1.66897	-0.214859	-1.34222	-0.789884									-0.709512	0.513582		-0.555166	0.698132		-1.65411	0.16731		-0.917278	0.457699		0	0	0	0.647596		GO:0006936~muscle contraction;GO:0014728~regulation of the force of skeletal muscle contraction;GO:0014732~skeletal muscle atrophy;GO:0014883~transition between fast and slow fiber;GO:0014894~response to denervation involved in regulation of muscle adaptation;GO:0030049~muscle filament sliding;GO:0031448~positive regulation of fast-twitch skeletal muscle fiber contraction;GO:0042981~regulation of…
>sp|Q9UER7|DAXX_HUMAN Death domain-associated protein 6 OS=Homo sapiens OX=9606 GN=DAXX PE=1 SV=2S(668)	Q9UER7	DAXX	S(668)	RSVHEKNGKKICTLPSPPSPLASLAPVADSS	Peptide10196		-0.428664	-0.56459	-0.956998	-1.73706	-0.658235		0						-0.45769	-0.225855	-0.941671	-1.44175	-0.213185									0.0479546	0.911508		-0.506157	0.21451		-1.14622	0.0209881		0.00746691	0.990452		0	0.282525	0	0		D-templated;GO:0001934~positive regulation of protein phosphorylation;GO:0006334~nucleosome assembly;GO:0006338~chromatin remodeling;GO:0006351~transcription;GO:0006355~regulation of transcription;GO:0006915~apoptotic process;GO:0007257~activation of JUN kise activity;GO:0008625~extrinsic apoptotic sigling pathway via death domain receptors;GO:0016032~viral process;GO:0016569~covalent chromatin m…
>sp|Q12888|TP53B_HUMAN TP53-binding protein 1 OS=Homo sapiens OX=9606 GN=TP53BP1 PE=1 SV=2S(552)	Q12888	TP53BP1	S(552)	DEDGENTQIEDTEPMSPVLNSKFVPAENDSI	Peptide10197		-0.351431	-0.0225722	-0.0259264	0.0603293	-0.204496		0	-0.0683725	-0.141767	-0.27926	-0.0770675		0.101274	-0.0502058	-0.0503221	0.0835831	-0.52734		-0.204678	0.269823	-0.0713307	-0.158358	-0.152869			0.145877	0.500847		0.0413723	0.913911		0.0402823	0.876663		-0.126734	0.620097		0	0	0.369105	0		D-templated;GO:0000077~D damage checkpoint;GO:0006303~double-strand break repair via nonhomologous end joining;GO:0006351~transcription;GO:0006974~cellular response to D damage stimulus;GO:0016925~protein sumoylation;GO:0045893~positive regulation of transcription;GO:0045944~positive regulation of transcription from R polymerase II promoter;GO:0051091~positive regulation of sequence-specific D bi…
>sp|Q9NYF8|BCLF1_HUMAN Bcl-2-associated >tr|anscription factor 1 OS=Homo sapiens OX=9606 GN=BCLAF1 PE=1 SV=2S(660)	Q9NYF8	BCLAF1	S(660)	RQKSPEIHRRIDISPSTLRKHTRLAGEERVF	Peptide10198		-0.16549	-0.180957	0.144715	0.0743018	0.217698		0	0.0710737	-0.0441682	-0.217667	0.287447		0.0181833	0.277691	-0.0866843	0.143712	-0.0673896		0.0369368	0.0722506	0.0466086	-0.189195	0.301952			0.0876069	0.685723		0.0427102	0.902033		-0.0196199	0.936624		0.212519	0.337866		0	0	0	0		D-templated;GO:0006351~transcription;GO:0006915~apoptotic process;GO:0043065~positive regulation of apoptotic process;GO:0043620~regulation of D-templated transcription in response to stress;GO:0045892~negative regulation of transcription;GO:2000144~positive regulation of D-templated transcription;GO:2001022~positive regulation of response to D damage stimulus;GO:2001244~positive regulation of in…
>tr||A0A286YFB1|A0A286YFB1_HUMAN >tr|oponin T; fast skeletal muscle OS=Homo sapiens OX=9606 GN=TNNT3 PE=1 SV=1S(174)	A0A286YFB1	TNNT3	S(174)	DITTLRSRIDQAQKHSKKAGTPAKGKVGGRW	Peptide10199		-0.965216	-0.57284	-0.898206	-1.29475	-0.563445		0						-0.776739	-1.37627	-0.0600259	-0.985939	-0.157114									-0.103576	0.887195		0.391861	0.617511		-0.269369	0.691241		0.510698	0.468316		0	0.703773	0	0
>tr||F5H8L4|F5H8L4_HUMAN SID1 >tr|ansmembrane family member 2 OS=Homo sapiens OX=9606 GN=SIDT2 PE=1 SV=1S(340)	F5H8L4	SIDT2	S(340)	KTLLVAIDRACPESASLLGHPRVLADSFPGS	Peptide102		-0.162746	-0.164819	-0.142574	-0.231967	-0.210666		0	-0.208162	-0.185316	-0.246994	-0.146937		-0.0580633	-0.229689	-0.135597	-0.325299	-0.219559		-0.191026	-0.33798	-0.285465	-0.148345	-0.0491506			-0.132204	0.31368		-0.0842791	0.633429		-0.135192	0.338483		-0.0536194	0.764807		0	0	0	0
>tr||A0A2R8YDH4|A0A2R8YDH4_HUMAN Tight junction protein ZO-2 OS=Homo sapiens OX=9606 GN=TJP2 PE=3 SV=1S(1115)	A0A2R8YDH4	TJP2	S(1115)	AQMRRAASSDQLRDNSPPPAFKPEPPKAKTQ	Peptide1020		-0.561603	-0.688782	-0.812192	-0.918287	-0.770186		0						-0.718751	-0.916453	-0.293028	-0.805975	-0.709071									-0.162441	0.655631		0.087567	0.874045		-0.221954	0.555209		-0.0994515	0.83071		0	0.732038	0	0
>sp|Q8WZ42|TITIN_HUMAN Titin OS=Homo sapiens OX=9606 GN=TTN PE=1 SV=4S(24029)	Q8WZ42	TTN	S(24029)	CHKNSWKIDQLQEGCSYYFRVTAENEYGIGL	Peptide10200		-0.120062	-0.0699256	-0.310974	0.0353934	0.125258		0	-0.419845	0.204795	0.467254	-0.123137		-0.13835	-0.211319	0.263897	-0.289384	-0.227559		-0.504214	-0.415222	-0.447272	0.422124	0.243253			-0.0884213	0.812838		0.118268	0.80992		0.349503	0.30223		0.19511	0.617059		0	0	0.426943	0		GO:0002576~platelet degranulation;GO:0003300~cardiac muscle hypertrophy;GO:0006936~muscle contraction;GO:0006941~striated muscle contraction;GO:0007076~mitotic chromosome condensation;GO:0018108~peptidyl-tyrosine phosphorylation;GO:0030049~muscle filament sliding;GO:0030240~skeletal muscle thin filament assembly;GO:0030241~skeletal muscle myosin thick filament assembly;GO:0035995~detection of mus…
>sp|Q99590|SCAFB_HUMAN Protein SCAF11 OS=Homo sapiens OX=9606 GN=SCAF11 PE=1 SV=2S(963)	Q99590	SCAF11	S(963)	KSKSSSFGRIDRDSYSPRWKGRWANDGWRCP	Peptide10201		-1.05698	-1.45363	-0.703839	-0.328844	-0.813267		0						-0.182124	-1.15726	-0.629461	-0.599352	-0.652829									-0.685893	0.154969		-0.0470986	0.955608		0.155453	0.781175		-0.113497	0.866338		0	0	0.334448	0		GO:0000245~spliceosomal complex assembly;GO:0000375~R splicing;GO:0006397~mR processing;GO:0008380~R splicing;via transesterification reactions
>sp|P02545|LM_HUMAN Prelamin-A/C OS=Homo sapiens OX=9606 GN=LM PE=1 SV=1S(301)	P02545	LM	S(301)	GAAHEELQQSRIRIDSLSAQLSQLQKQLAAK	Peptide10202		-0.815665	-0.0777877	0.186382	-0.0768022	0.197443		0	-0.271503	-0.00959456	-0.0947077	0.129389		0.0687203	0.111981	-0.138606	0.00223181	0.379753		0.046649	0.0977574	0.136303	-0.110179	0.14646			0.140186	0.623171		0.218695	0.511335		0.10521	0.739434		0.388335	0.176241		0	0.522771	0	0		GO:0007077~mitotic nuclear envelope disassembly;GO:0007084~mitotic nuclear envelope reassembly;GO:0007517~muscle organ development;GO:0030334~regulation of cell migration;GO:0030951~establishment or maintence of microtubule cytoskeleton polarity;GO:0034504~protein localization to nucleus;GO:0035105~sterol regulatory element binding protein import into nucleus;GO:0036498~IRE1-mediated unfolded pro…
>sp|Q8WZ42|TITIN_HUMAN Titin OS=Homo sapiens OX=9606 GN=TTN PE=1 SV=4T(18195)	Q8WZ42	TTN	T(18195)	KKEDRDAPTKARIDVTPVGSKLEIRAHED	Peptide10203		-0.00517395	-0.0182699	0.131335	0.185658	-0.0201565		0	0.0767051	-0.163156	0.00629891	0.182749		0.235384	0.116081	-0.203702	0.0137293	0.0640952		-0.116938	0.271587	-0.0347682	0.0687949	0.0749624			0.0832077	0.644262		-0.0958907	0.676466		0.0403021	0.844089		0.0470943	0.840335		0	0	0	0		GO:0002576~platelet degranulation;GO:0003300~cardiac muscle hypertrophy;GO:0006936~muscle contraction;GO:0006941~striated muscle contraction;GO:0007076~mitotic chromosome condensation;GO:0018108~peptidyl-tyrosine phosphorylation;GO:0030049~muscle filament sliding;GO:0030240~skeletal muscle thin filament assembly;GO:0030241~skeletal muscle myosin thick filament assembly;GO:0035995~detection of mus…
>sp|Q8WZ42|TITIN_HUMAN Titin OS=Homo sapiens OX=9606 GN=TTN PE=1 SV=4T(19856)	Q8WZ42	TTN	T(19856)	KKLRIEAHVYGKPHPTCKWKKGEDEVVTSSH	Peptide10204		0.191373	0.0918108	-0.0109564	0.0685873	0.0412228		0	-0.114291	0.0110528	0.457836	0.0606886		0.0333437	-0.177584	0.141577	-0.0461032	-0.087379		-0.264271	-0.164265	-0.290083	0.455793	0.13467			-0.0811938	0.750096		-0.0272139	0.947874		0.243917	0.300925		0.0471891	0.882459		0.379868	0	0	0		GO:0002576~platelet degranulation;GO:0003300~cardiac muscle hypertrophy;GO:0006936~muscle contraction;GO:0006941~striated muscle contraction;GO:0007076~mitotic chromosome condensation;GO:0018108~peptidyl-tyrosine phosphorylation;GO:0030049~muscle filament sliding;GO:0030240~skeletal muscle thin filament assembly;GO:0030241~skeletal muscle myosin thick filament assembly;GO:0035995~detection of mus…
>sp|Q8WZ42|TITIN_HUMAN Titin OS=Homo sapiens OX=9606 GN=TTN PE=1 SV=4Y(19850)	Q8WZ42	TTN	Y(19850)	ITIKAGKKLRIEAHVYGKPHPTCKWKKGEDE	Peptide10205		-0.912326	-0.670677	-0.803414	-1.20176	-0.689775		0						-0.854873	-1.02297	-0.160203	-0.661929	-0.676533									0.0367751	0.948913		0.401791	0.472198		-0.0482466	0.931343		0.200446	0.730535		0	0.727095	0	0		GO:0002576~platelet degranulation;GO:0003300~cardiac muscle hypertrophy;GO:0006936~muscle contraction;GO:0006941~striated muscle contraction;GO:0007076~mitotic chromosome condensation;GO:0018108~peptidyl-tyrosine phosphorylation;GO:0030049~muscle filament sliding;GO:0030240~skeletal muscle thin filament assembly;GO:0030241~skeletal muscle myosin thick filament assembly;GO:0035995~detection of mus…
>sp|Q9Y623|MYH4_HUMAN Myosin-4 OS=Homo sapiens OX=9606 GN=MYH4 PE=2 SV=2T(95)	Q9Y623	MYH4	T(95)	MNPPKYDKIEDMAMMTHLHEPAVLYNLKERY	Peptide10206		-0.302461	-0.169257	-0.146048	0.0665643	0.0178587		0	-0.259236	0.116499	0.126847	-0.193551		-0.0145637	-0.116834	-0.0242937	-0.0153663	-0.0554068		-0.215775	-0.11228	-0.0419221	-0.0740265	0.0864238			-0.0312018	0.873149		0.109259	0.600941		0.159205	0.345463		0.0970312	0.616679		0	0	0.467702	0		GO:0006936~muscle contraction;GO:0014823~response to activity;GO:0030048~actin filament-based movement;GO:0030049~muscle filament sliding;GO:0046034~ATP metabolic process
>sp|Q9Y623|MYH4_HUMAN Myosin-4 OS=Homo sapiens OX=9606 GN=MYH4 PE=2 SV=2Y(104)	Q9Y623	MYH4	Y(104)	EDMAMMTHLHEPAVLYNLKERYAAWMIYTYS	Peptide10207		-0.08191	-0.0475218	-0.166463	0.260004	-0.0806823		0	-0.127645	0.134538	-0.042379	-0.043158		-0.0253666	-0.184875	0.157947	-0.0352569	-0.180499		-0.269255	-0.0153423	-0.0585121	0.174671	-0.0166944			0.000287106	0.9989		0.11101	0.616916		0.183393	0.302372		0.0138744	0.958474		0	0	0.41611	0		GO:0006936~muscle contraction;GO:0014823~response to activity;GO:0030048~actin filament-based movement;GO:0030049~muscle filament sliding;GO:0046034~ATP metabolic process
>sp|Q13435|SF3B2_HUMAN Splicing factor 3B subunit 2 OS=Homo sapiens OX=9606 GN=SF3B2 PE=1 SV=2T(780)	Q13435	SF3B2	T(780)	ELRKKKIEEAMDGSETPQLFTVLPEKRTATV	Peptide10208		-0.503702	-0.944714	-0.206231	-0.947626	-0.975481		0						-0.300958	-0.761824	-0.348907	-1.0832	-0.52361									-0.450939	0.174124		0.124761	0.799421		-0.613082	0.111062		-0.347216	0.364153		0	0.303822	0	0		GO:0000398~mR splicing;GO:0006397~mR processing;GO:0008380~R splicing;GO:0016032~viral process;via spliceosome
>sp|Q9UKX3|MYH13_HUMAN Myosin-13 OS=Homo sapiens OX=9606 GN=MYH13 PE=2 SV=2T(1131)	Q9UKX3	MYH13	T(1131)	QARIEELEEEIEAEHTLRAKIEKQRSDLARE	Peptide10209		-0.840455	-0.817138	-0.754765	-0.981779	-0.570921		0						-0.608733	-0.819423	-0.475926	-0.859754	-0.438905									-0.0936861	0.7692		0.109248	0.794486		-0.196172	0.525023		0.219681	0.508892		0	0.691167	0	0		GO:0006936~muscle contraction;GO:0009267~cellular response to starvation
>sp|O95810|CAVN2_HUMAN Caveolae-associated protein 2 OS=Homo sapiens OX=9606 GN=CAVIN2 PE=1 SV=3S(51)	O95810	CAVIN2	S(51)	PSLNLGNTEEAIRDNSQVVTVLTLLDKLV	Peptide1021		-0.791623	-0.702448	-0.594672	-0.925352	-0.828769		0						-0.507383	-0.981166	-0.465466	-1.03109	-0.499181									-0.192304	0.568306		0.119434	0.805025		-0.328718	0.347017		-0.0144722	0.977166		0	0.787617	0	0
>sp|P05976|MYL1_HUMAN Myosin light chain 1/3; skeletal muscle isoform OS=Homo sapiens OX=9606 GN=MYL1 PE=2 SV=3S(48)	P05976	MYL1	S(48)	PKEEKIDLSAIKIEFSKEQQDEFKEAFLLFD	Peptide10210		-0.22516	-0.033195	0.277156	-0.014986	0.217037		0	-0.12939	0.221872	0.430403	-0.0397346		-0.109791	0.104692	0.246837	0.105546	0.167549		0.069079	0.0781153	0.0796727	-0.0824095	0.250581			0.0715235	0.739177		0.272852	0.185606		0.176106	0.381864		0.215326	0.304354		0	0.52502	0	0		GO:0006936~muscle contraction;GO:0030049~muscle filament sliding;GO:0060048~cardiac muscle contraction
>sp|Q8WZ42|TITIN_HUMAN Titin OS=Homo sapiens OX=9606 GN=TTN PE=1 SV=4T(1609)	Q8WZ42	TTN	T(1609)	DIIVPHKYPKIRIEGTKGEAALKIDSTVSQD	Peptide10211		0.338636	0.491033	-0.02656	0.0308552	-0.194137		0	0.503698	-0.057623	0.256464	-0.161708		-0.0731194	0.0395003	-0.0213621	0.258855	-0.0610996		0.0208098	0.0795718	-0.135777	0.171251	-0.04376			0.206869	0.282848		-0.131912	0.612132		0.107775	0.627636		-0.186758	0.412388		0	0	0	0.328308		GO:0002576~platelet degranulation;GO:0003300~cardiac muscle hypertrophy;GO:0006936~muscle contraction;GO:0006941~striated muscle contraction;GO:0007076~mitotic chromosome condensation;GO:0018108~peptidyl-tyrosine phosphorylation;GO:0030049~muscle filament sliding;GO:0030240~skeletal muscle thin filament assembly;GO:0030241~skeletal muscle myosin thick filament assembly;GO:0035995~detection of mus…
>sp|Q8WZ42|TITIN_HUMAN Titin OS=Homo sapiens OX=9606 GN=TTN PE=1 SV=4T(14640)	Q8WZ42	TTN	T(14640)	AGLTVKAGTKIELPATVTGKPEPKITWTKAD	Peptide10212		0.398096	0.0596367	0.200394	-0.0622098	0.00593853		0	0.245591	0.132651	-0.0963525	0.0928335		-0.144741	0.133208	0.323128	0.0878513	-0.264969		0.178176	-0.0654766	0.162098	0.0022075	-0.0358564			-0.0146429	0.953757		0.0966851	0.718743		-0.125009	0.556037		-0.158396	0.479311		0	0	0	0.608321		GO:0002576~platelet degranulation;GO:0003300~cardiac muscle hypertrophy;GO:0006936~muscle contraction;GO:0006941~striated muscle contraction;GO:0007076~mitotic chromosome condensation;GO:0018108~peptidyl-tyrosine phosphorylation;GO:0030049~muscle filament sliding;GO:0030240~skeletal muscle thin filament assembly;GO:0030241~skeletal muscle myosin thick filament assembly;GO:0035995~detection of mus…
>sp|P54296|MYOM2_HUMAN Myomesin-2 OS=Homo sapiens OX=9606 GN=MYOM2 PE=1 SV=2Y(209)	P54296	MYOM2	Y(209)	ICQAAEPGKYRIESNYGVHTLEINRADFDDT	Peptide10213		-0.32396	-0.0460189	-0.149363	-0.192095	-0.142854		0	-0.400757	0.182897	-0.258074	-0.192661		-0.095803	-0.273594	0.155425	-0.345778	-0.0671232		0.0534558	-0.175106	-0.307467	0.0563295	-0.183901			-0.132292	0.547588		0.0619495	0.855047		-0.0933275	0.703537		-0.0550581	0.854271		0	0	0	0		GO:0006936~muscle contraction
>sp|P20929|NEBU_HUMAN Nebulin OS=Homo sapiens OX=9606 GN=NEB PE=1 SV=5T(4157)	P20929	NEB	T(4157)	FSEKKYRTKIETLNFTPVDDRVDYVTAKQSG	Peptide10214		-0.101302	-0.111005	0.00855962	0.00887089	0.305835		0	-0.216473	0.0142936	0.0834988	0.225555		0.149394	0.051548	0.0673442	-0.140245	0.173183		-0.113549	0.292628	0.171806	-0.0785512	0.108906			0.0205388	0.928407		0.081865	0.748856		-0.0152424	0.945682		0.219734	0.260612		0	0	0	0		GO:0007517~muscle organ development;GO:0007525~somatic muscle development;GO:0030049~muscle filament sliding;GO:0030832~regulation of actin filament length
>sp|Q8WZ42|TITIN_HUMAN Titin OS=Homo sapiens OX=9606 GN=TTN PE=1 SV=4S(24181)	Q8WZ42	TTN	S(24181)	YSVQVGQDLKIEVPISGRPKPTITWTKDGLP	Peptide10215		0.0176037	0.0895623	0.0395706	-0.357416	-0.01262		0	-0.194334	0.0463747	0.212219	-0.151559		-0.0823647	-0.0611782	0.236929	-0.170762	-0.269261		0.0243098	-0.158179	-0.152171	0.0971054	-0.14244			-0.0709193	0.756915		0.0527888	0.87358		-0.0446006	0.855844		-0.133857	0.577831		0	0	0	0		GO:0002576~platelet degranulation;GO:0003300~cardiac muscle hypertrophy;GO:0006936~muscle contraction;GO:0006941~striated muscle contraction;GO:0007076~mitotic chromosome condensation;GO:0018108~peptidyl-tyrosine phosphorylation;GO:0030049~muscle filament sliding;GO:0030240~skeletal muscle thin filament assembly;GO:0030241~skeletal muscle myosin thick filament assembly;GO:0035995~detection of mus…
>tr||A0A0A0MTS7|A0A0A0MTS7_HUMAN Titin OS=Homo sapiens OX=9606 GN=TTN PE=1 SV=1T(12010)	A0A0A0MTS7	TTN	T(12010)	VPEMKIFEDVPEEPETPRMKTPEAPQEIIPA	Peptide10216		-3.51391	-0.316376	-1.22422	-1.12918	-0.142163		0						-3.04209	0.0355945	1.87626	-2.3101	-0.284098									3.13761	0.0477957		3.60402	0.0466816		1.55836	0.333581		3.06487	0.0863245		0	0.587092	0	0		GO:0002576~platelet degranulation;GO:0003300~cardiac muscle hypertrophy;GO:0006936~muscle contraction;GO:0006941~striated muscle contraction;GO:0007076~mitotic chromosome condensation;GO:0018108~peptidyl-tyrosine phosphorylation;GO:0030049~muscle filament sliding;GO:0030240~skeletal muscle thin filament assembly;GO:0030241~skeletal muscle myosin thick filament assembly;GO:0035995~detection of mus…
>sp|Q8WZ42|TITIN_HUMAN Titin OS=Homo sapiens OX=9606 GN=TTN PE=1 SV=4S(8259)	Q8WZ42	TTN	S(8259)	VKQDEFTRYECKIGGSPEIKVLWYKDETEIQ	Peptide10217		-0.184879	-0.270431	0.101769	-0.0513781	-0.258046		0	-0.205179	-0.195557	0.133671	-0.264223		-0.154287	-0.0861808	-0.104317	-0.0859736	-0.13656		0.0435582	-0.252199	-0.28849	-0.137116	-0.0327713			-0.129596	0.452097		-0.0477468	0.860633		0.0387027	0.85114		-0.098998	0.629063		0	0	0	0		GO:0002576~platelet degranulation;GO:0003300~cardiac muscle hypertrophy;GO:0006936~muscle contraction;GO:0006941~striated muscle contraction;GO:0007076~mitotic chromosome condensation;GO:0018108~peptidyl-tyrosine phosphorylation;GO:0030049~muscle filament sliding;GO:0030240~skeletal muscle thin filament assembly;GO:0030241~skeletal muscle myosin thick filament assembly;GO:0035995~detection of mus…
>sp|Q8WZ42|TITIN_HUMAN Titin OS=Homo sapiens OX=9606 GN=TTN PE=1 SV=4T(18620)	Q8WZ42	TTN	T(18620)	VRAENKIGVGPPLDSTPTVAKHKFSPPSPPG	Peptide10218		0.0757398	-0.0155632	-0.0176327	0.0454811	-0.0746857		0	0.0223922	-0.221127	-0.115089	0.0567836		-0.143797	0.0236534	0.128811	-0.131956	-0.00469469		0.137308	0.260301	0.0206881	-0.118433	-0.194869			0.0553831	0.772789		-0.0396281	0.889457		-0.0973119	0.601285		-0.0716792	0.744738		0	0	0	0		GO:0002576~platelet degranulation;GO:0003300~cardiac muscle hypertrophy;GO:0006936~muscle contraction;GO:0006941~striated muscle contraction;GO:0007076~mitotic chromosome condensation;GO:0018108~peptidyl-tyrosine phosphorylation;GO:0030049~muscle filament sliding;GO:0030240~skeletal muscle thin filament assembly;GO:0030241~skeletal muscle myosin thick filament assembly;GO:0035995~detection of mus…
>sp|Q8WZ42|TITIN_HUMAN Titin OS=Homo sapiens OX=9606 GN=TTN PE=1 SV=4S(18619)	Q8WZ42	TTN	S(18619)	RVRAENKIGVGPPLDSTPTVAKHKFSPPSPP	Peptide10219		-0.935473	-0.974853	-0.66264	-1.19294	-0.953265		0						-0.876135	-0.897412	-0.146126	-1.08154	-0.797322									-0.0303285	0.941891		0.501422	0.188729		-0.231433	0.519017		0.0305103	0.951836		0	0.713436	0	0		GO:0002576~platelet degranulation;GO:0003300~cardiac muscle hypertrophy;GO:0006936~muscle contraction;GO:0006941~striated muscle contraction;GO:0007076~mitotic chromosome condensation;GO:0018108~peptidyl-tyrosine phosphorylation;GO:0030049~muscle filament sliding;GO:0030240~skeletal muscle thin filament assembly;GO:0030241~skeletal muscle myosin thick filament assembly;GO:0035995~detection of mus…
>sp|Q8NEY8|PPHLN_HUMAN Periphilin-1 OS=Homo sapiens OX=9606 GN=PPHLN1 PE=1 SV=2S(133)	Q8NEY8	PPHLN1	S(133)	RERSPYKRDNTFFRESPVGRKDSPHSRSGSS	Peptide1022		-0.0686181	-0.264919	-0.321667	-0.216223	0.0480171		0	-0.219891	-0.0847397	-0.243232	-0.165627		-0.230318	-0.0770418	-0.0282058	-0.179961	-0.0296193		0.177232	-0.173378	-0.0023927	-0.412335	-0.124733			-0.153381	0.366938		-0.0788252	0.748096		-0.232512	0.198971		-0.0375645	0.877273		0	0	0	0		D-templated;GO:0006351~transcription;GO:0006355~regulation of transcription;GO:0031424~keratinization
>sp|Q8WZ42|TITIN_HUMAN Titin OS=Homo sapiens OX=9606 GN=TTN PE=1 SV=4S(20603)	Q8WZ42	TTN	S(20603)	QFRVYAVNKIGYSDPSDVPDKHYPKDILIPP	Peptide10220		0.448082	0.33782	-0.137245	-0.101257	-0.491215		0	0.6449	0.0194526	-0.392788	-0.302605		-0.468147	0.00892749	0.0903774	-0.0565585	-0.285727		0.116566	-0.503373	-0.290288	-0.015934	-0.0888946			0.0979432	0.811724		-0.103551	0.855047		-0.165759	0.679828		-0.316236	0.437253		0	0	0	0.449501		GO:0002576~platelet degranulation;GO:0003300~cardiac muscle hypertrophy;GO:0006936~muscle contraction;GO:0006941~striated muscle contraction;GO:0007076~mitotic chromosome condensation;GO:0018108~peptidyl-tyrosine phosphorylation;GO:0030049~muscle filament sliding;GO:0030240~skeletal muscle thin filament assembly;GO:0030241~skeletal muscle myosin thick filament assembly;GO:0035995~detection of mus…
>sp|Q14315|FLNC_HUMAN Filamin-C OS=Homo sapiens OX=9606 GN=FLNC PE=1 SV=3S(1637)	Q14315	FLNC	S(1637)	PYSPFRIHALPTGDASKCLVTVSIGGHGLGA	Peptide10221		-0.107728	0.104266	-0.256497	-0.66479	0.138372		0	-0.0778265	0.181374	-0.00574255	-0.312121		-0.759465	0.0689782	0.352005	-0.637223	0.441517		0.318629	-0.721614	-0.209127	-0.26382	0.107637			-0.019408	0.969965		0.15408	0.803516		-0.255753	0.571168		0.230992	0.643574		0	0.43286	0	0		GO:0034329~cell junction assembly;GO:0048747~muscle fiber development
>sp|A7E2Y1|MYH7B_HUMAN Myosin-7B OS=Homo sapiens OX=9606 GN=MYH7B PE=1 SV=4S(300)	A7E2Y1	MYH7B	S(300)	NSSRFGKFIRIHFGPSGKLASADIDSYLLEK	Peptide10222		-0.284542	0.0768491	0.288547	0.122321	-0.0361208		0	0.0682508	0.26739	0.0424612	-0.0353142		0.000647019	-0.0305213	0.207141	-0.0379989	0.251568		-0.274921	0.0242884	0.442216	-0.0401457	0.117291			0.174421	0.266085		0.441028	0.0110071		0.161363	0.34546		0.21406	0.223567		0	0.641203	0	0
>sp|Q9UKX2|MYH2_HUMAN Myosin-2 OS=Homo sapiens OX=9606 GN=MYH2 PE=1 SV=1T(258)	Q9UKX2	MYH2	T(258)	NSSRFGKFIRIHFGTTGKLASADIETYLLEK	Peptide10223		0.173226	-0.0218337	-0.150983	-0.1853	0.204065		0	0.00725633	-0.0320217	0.455684	-0.170802		-0.260481	-0.308849	0.156099	0.317426	-0.00714907		-0.153719	-0.456854	0.441449	-0.216386	0.0933075			-0.134826	0.665649		0.163879	0.676466		0.1531	0.636637		0.0900988	0.821117		0.31292	0	0	0		GO:0001778~plasma membrane repair;GO:0006936~muscle contraction;GO:0014823~response to activity;GO:0030049~muscle filament sliding;GO:0038096~Fc-gamma receptor sigling pathway involved in phagocytosis
>sp|Q14324|MYPC2_HUMAN Myosin-binding protein C; fast-type OS=Homo sapiens OX=9606 GN=MYBPC2 PE=1 SV=2S(546)	Q14324	MYBPC2	S(546)	EYVPKQEPPKIHLDCSGKTSEIVVVAGNK	Peptide10224		-0.411652	-0.0576872	0.237839	0.245624	0.431242		0	-0.40873	0.245727	0.281195	0.445847		0.252815	-0.219044	0.267493	-0.0183317	0.376547		-0.383271	0.246103	0.179633	0.297058	0.396565			0.0256872	0.936061		0.3682	0.163147		0.336913	0.194632		0.548077	0.0399061		0	0	0.412289	0		GO:0006936~muscle contraction;GO:0007155~cell adhesion;GO:0030049~muscle filament sliding
>sp|P20929|NEBU_HUMAN Nebulin OS=Homo sapiens OX=9606 GN=NEB PE=1 SV=5T(5035)	P20929	NEB	T(5035)	LYRELYHKLKDKIHTTPDTPEIRQVKKTQEA	Peptide10225		-0.157981	0.11995	0.000467447	-0.520856	-0.0461867		0	0.0210993	0.093533	-0.535107	-0.1		-0.095492	-0.0313556	-0.0111387	-0.418223	0.247443		0.239066	-0.0345691	-0.0285634	-0.465742	-0.0606888			0.0223828	0.913631		0.0171763	0.953808		-0.48138	0.0104741		0.0137435	0.958194		0	0	0	0.379626		GO:0007517~muscle organ development;GO:0007525~somatic muscle development;GO:0030049~muscle filament sliding;GO:0030832~regulation of actin filament length
>sp|Q8WZ42|TITIN_HUMAN Titin OS=Homo sapiens OX=9606 GN=TTN PE=1 SV=4S(10206)	Q8WZ42	TTN	S(10206)	VQKEIVTEEKIHVAISKRVEPPPKVPELPEK	Peptide10226		-0.660764	-1.72079	-1.29163	-0.331607	-0.2365		0	-1.63526	0.0350542	-0.464239	-1.11207		-0.414137	-0.738547	-0.552077	-0.791778	-0.45143		-0.125785	-1.55439	-0.51982	-0.874624	-0.315613			-1.11208	0.0113193		-0.281946	0.644737		-0.31539	0.528879		-0.228732	0.691172		0.617592	0	0	0		GO:0002576~platelet degranulation;GO:0003300~cardiac muscle hypertrophy;GO:0006936~muscle contraction;GO:0006941~striated muscle contraction;GO:0007076~mitotic chromosome condensation;GO:0018108~peptidyl-tyrosine phosphorylation;GO:0030049~muscle filament sliding;GO:0030240~skeletal muscle thin filament assembly;GO:0030241~skeletal muscle myosin thick filament assembly;GO:0035995~detection of mus…
>sp|P20929|NEBU_HUMAN Nebulin OS=Homo sapiens OX=9606 GN=NEB PE=1 SV=5T(2254)	P20929	NEB	T(2254)	IDWNKDKTKIHVMPDTPDILQAKQNQTLYSQ	Peptide10227		-1.0581	-0.923991	-0.322612	-1.23861	-0.541866		0						-0.816063	-0.738778	-0.106323	-1.14496	-0.590344									0.105695	0.731965		0.722612	0.0363268		-0.254705	0.395292		0.370974	0.247239		0	0.785796	0	0		GO:0007517~muscle organ development;GO:0007525~somatic muscle development;GO:0030049~muscle filament sliding;GO:0030832~regulation of actin filament length
>sp|Q8WZ42|TITIN_HUMAN Titin OS=Homo sapiens OX=9606 GN=TTN PE=1 SV=4T(17482)	Q8WZ42	TTN	T(17482)	GVIRIIAYVSGKPPPTVTWNMNERTLPQEAT	Peptide10228		0.353826	0.498247	0.101214	-0.426861	0.0660201		0	0.30918	-0.00479586	0.183496	-0.00653243		-0.158312	0.0108408	0.346665	-0.0172097	-0.0479881		0.116924	0.0571729	0.175264	-0.00391493	-0.135642			0.140751	0.578248		0.0764772	0.842638		-0.144232	0.588863		-0.109145	0.726812		0	0	0	0.45725		GO:0002576~platelet degranulation;GO:0003300~cardiac muscle hypertrophy;GO:0006936~muscle contraction;GO:0006941~striated muscle contraction;GO:0007076~mitotic chromosome condensation;GO:0018108~peptidyl-tyrosine phosphorylation;GO:0030049~muscle filament sliding;GO:0030240~skeletal muscle thin filament assembly;GO:0030241~skeletal muscle myosin thick filament assembly;GO:0035995~detection of mus…
>sp|Q8WZ42|TITIN_HUMAN Titin OS=Homo sapiens OX=9606 GN=TTN PE=1 SV=4S(17476)	Q8WZ42	TTN	S(17476)	IVVHAGGVIRIIAYVSGKPPPTVTWNMNERT	Peptide10229		-0.915656	-0.836102	-0.643584	-0.951103	-0.907829		0						-0.684251	-1.04706	-0.528033	-1.02144	-0.458958									-0.141626	0.691782		0.214145	0.620998		-0.186319	0.611029		0.11656	0.795538		0	0.778203	0	0		GO:0002576~platelet degranulation;GO:0003300~cardiac muscle hypertrophy;GO:0006936~muscle contraction;GO:0006941~striated muscle contraction;GO:0007076~mitotic chromosome condensation;GO:0018108~peptidyl-tyrosine phosphorylation;GO:0030049~muscle filament sliding;GO:0030240~skeletal muscle thin filament assembly;GO:0030241~skeletal muscle myosin thick filament assembly;GO:0035995~detection of mus…
>sp|Q711Q0|CEFIP_HUMAN Cardiac-enriched FHL2-interacting protein OS=Homo sapiens OX=9606 GN=CEFIP PE=1 SV=2T(865)	Q711Q0	CEFIP	T(865)	NRHMLFTIKDNTLRATPVIKPIMLPLLRTMS	Peptide1023		-0.113651	-0.0216823	-0.318201	0.0509804	0.110659		0	-0.0613559	-0.303336	0.104787	0.0247467		-0.166	-0.0906665	-0.0111101	0.00691718	-0.0119754		-0.188882	0.0387398	0.061472	-0.106292	-0.010314			0.0833921	0.621335		-0.0256605	0.931769		0.131231	0.437614		0.145412	0.426824		0	0	0.551547	0
>tr||H0YDG6|H0YDG6_HUMAN LIM domain only protein 7 (Fragment) OS=Homo sapiens OX=9606 GN=LMO7 PE=1 SV=1S(176)	H0YDG6	LMO7	S(176)	HKTLNLTSMATKIIGSPETKWIDATSGIYNS	Peptide10230		-1.17198	-1.07586	-0.379139	-1.86288	-0.15405		0						-0.717602	-1.04774	-0.212528	-1.26977	0.283679									-0.117004	0.817416		0.64896	0.20575		-0.621532	0.212601		1.00961	0.064066		0	0.570011	0	0		GO:0016337~single organismal cell-cell adhesion;GO:0016567~protein ubiquitition;GO:0023051~regulation of sigling;GO:0030155~regulation of cell adhesion
>sp|O95292|VAPB_HUMAN Vesicle-associated membrane protein-associated protein B/C OS=Homo sapiens OX=9606 GN=VAPB PE=1 SV=3S(146)	O95292	VAPB	S(146)	KPHDVEINKIISTTASKTETPIVSKSLSSSL	Peptide10231		0.20241	-0.505447	0.447011	-0.505605	-0.179284		0	-0.186138	0.113635	-0.548972	-0.1421		-0.188678	-0.110436	0.482856	-0.448701	-0.602712		0.0916557	-0.0981955	0.350422	-0.920553	-0.151114			-0.251401	0.274904		0.322134	0.212475		-0.632305	0.0181928		-0.295149	0.256272		0	0	0	0.464077		GO:0006874~cellular calcium ion homeostasis;GO:0006888~ER to Golgi vesicle-mediated transport;GO:0006987~activation of sigling protein activity involved in unfolded protein response;GO:0007029~endoplasmic reticulum organization;GO:0019048~modulation by virus of host morphology or physiology;GO:0030148~sphingolipid biosynthetic process;GO:0030968~endoplasmic reticulum unfolded protein response;GO:…
>sp|P12883|MYH7_HUMAN Myosin-7 OS=Homo sapiens OX=9606 GN=MYH7 PE=1 SV=5Y(1852)	P12883	MYH7	Y(1852)	VKGMRKSERRIKELTYQTEEDRKNLLRLQDL	Peptide10232		-0.675906	-0.654554	-0.331862	-0.76513	-0.72141		0	0.287187	-1.22572	-1.12377	-0.696566		-0.890624	0.0358177	-0.731916	-0.521184	-0.482607		-0.133099	-0.853856	0.0621821	-1.93464	-0.118992			0.128556	0.849051		-0.131922	0.89085		-0.661274	0.267023		-0.0799865	0.924986		0	0.369687	0	0		GO:0002026~regulation of the force of heart contraction;GO:0002027~regulation of heart rate;GO:0003009~skeletal muscle contraction;GO:0006936~muscle contraction;GO:0006941~striated muscle contraction;GO:0007512~adult heart development;GO:0014728~regulation of the force of skeletal muscle contraction;GO:0014883~transition between fast and slow fiber;GO:0014898~cardiac muscle hypertrophy in respons…
>sp|P12883|MYH7_HUMAN Myosin-7 OS=Homo sapiens OX=9606 GN=MYH7 PE=1 SV=5T(1851)	P12883	MYH7	T(1851)	SVKGMRKSERRIKELTYQTEEDRKNLLRLQD	Peptide10233		-0.611233	-0.0336136	-0.291129	-0.16399	-0.603685		0	-0.102434	-0.167764	-0.677759	-0.471992		-0.26926	-0.17886	-0.177062	-0.390004	-0.334851		-0.131746	-0.342529	-0.366268	-0.227735	-0.329686			0.0887005	0.727383		0.00250413	0.994456		-0.111813	0.661835		-0.181994	0.487781		0	0	0.382194	0		GO:0002026~regulation of the force of heart contraction;GO:0002027~regulation of heart rate;GO:0003009~skeletal muscle contraction;GO:0006936~muscle contraction;GO:0006941~striated muscle contraction;GO:0007512~adult heart development;GO:0014728~regulation of the force of skeletal muscle contraction;GO:0014883~transition between fast and slow fiber;GO:0014898~cardiac muscle hypertrophy in respons…
>sp|P12883|MYH7_HUMAN Myosin-7 OS=Homo sapiens OX=9606 GN=MYH7 PE=1 SV=5T(1854)	P12883	MYH7	T(1854)	GMRKSERRIKELTYQTEEDRKNLLRLQDLVD	Peptide10234		-1.14418	-0.513055	-0.526542	-0.756311	-1.02819		0						-0.805361	-0.318242	-0.366457	-0.981203	-0.730869									0.559122	0.100033		0.528271	0.168564		0.106014	0.782688		0.0952404	0.831539		0	0.465607	0	0		GO:0002026~regulation of the force of heart contraction;GO:0002027~regulation of heart rate;GO:0003009~skeletal muscle contraction;GO:0006936~muscle contraction;GO:0006941~striated muscle contraction;GO:0007512~adult heart development;GO:0014728~regulation of the force of skeletal muscle contraction;GO:0014883~transition between fast and slow fiber;GO:0014898~cardiac muscle hypertrophy in respons…
>sp|P08590|MYL3_HUMAN Myosin light chain 3 OS=Homo sapiens OX=9606 GN=MYL3 PE=1 SV=3T(47)	P08590	MYL3	T(47)	PKEVEFDASKIKIEFTPEQIEEFKEAFMLFD	Peptide10235		-0.575864	-0.147163	-0.339498	-0.00198432	-0.70566		0	-0.285888	-0.898818	-0.877951	-0.0143444		0.0642982	-0.65124	-0.524714	-0.972866	0.201317		-0.557619	0.182317	-0.574154	-0.348778	-0.299044			0.0418024	0.937906		-0.317	0.541774		-0.283099	0.530885		0.0628633	0.91943		0	0	0.360961	0		GO:0002026~regulation of the force of heart contraction;GO:0006942~regulation of striated muscle contraction;GO:0007519~skeletal muscle tissue development;GO:0030049~muscle filament sliding;GO:0032781~positive regulation of ATPase activity;GO:0055010~ventricular cardiac muscle tissue morphogenesis;GO:0060048~cardiac muscle contraction
>sp|Q9UKX2|MYH2_HUMAN Myosin-2 OS=Homo sapiens OX=9606 GN=MYH2 PE=1 SV=1Y(1494)	Q9UKX2	MYH2	Y(1494)	EARSLGTELFKIKYEESLDQLETLKRENK	Peptide10236		1.36305	0.499322	0.28885	-0.0870789	-0.0295976		0	0.7486	0.440211	0.723335	-0.173593		0.310537	0.113953	0.158598	0.190154	0.0361814		-0.155447	-0.00327611	0.461097	0.219839	0.0396909			-0.0398845	0.94339		-0.042345	0.956792		-0.117972	0.821032		-0.411364	0.411122		0	0	0	0.626544		GO:0001778~plasma membrane repair;GO:0006936~muscle contraction;GO:0014823~response to activity;GO:0030049~muscle filament sliding;GO:0038096~Fc-gamma receptor sigling pathway involved in phagocytosis
>sp|Q9UKX2|MYH2_HUMAN Myosin-2 OS=Homo sapiens OX=9606 GN=MYH2 PE=1 SV=1S(1497)	Q9UKX2	MYH2	S(1497)	SLGTELFKIKYEESLDQLETLKRENKNLQ	Peptide10237		0.354517	0.130921	-0.0804196	-0.184072	-0.128341		0	0.0487288	0.305725	0.566649	-0.537756		0.162147	-0.296335	-0.125583	0.0506916	0.0785885		-0.238531	-0.230495	0.0122976	-0.120611	0.0605786			-0.156329	0.631661		-0.0415287	0.942764		0.00863069	0.981962		-0.201266	0.586682		0.424139	0	0	0		GO:0001778~plasma membrane repair;GO:0006936~muscle contraction;GO:0014823~response to activity;GO:0030049~muscle filament sliding;GO:0038096~Fc-gamma receptor sigling pathway involved in phagocytosis
>sp|Q9UKX2|MYH2_HUMAN Myosin-2 OS=Homo sapiens OX=9606 GN=MYH2 PE=1 SV=1T(1503)	Q9UKX2	MYH2	T(1503)	FKIKYEESLDQLETLKRENKNLQQEISDL	Peptide10238		0.417937	-0.0639321	0.241114	0.190286	0.357694		0	-0.0270282	-0.0861331	0.740225	0.348773		0.166451	0.0175147	0.0344283	0.157258	0.349334		-0.0793458	0.0739203	0.053043	0.31784	0.340614			-0.126142	0.572621		-0.0656474	0.84564		0.225142	0.317498		0.222843	0.351392		0.488087	0	0	0		GO:0001778~plasma membrane repair;GO:0006936~muscle contraction;GO:0014823~response to activity;GO:0030049~muscle filament sliding;GO:0038096~Fc-gamma receptor sigling pathway involved in phagocytosis
>sp|Q08043|ACTN3_HUMAN Alpha-actinin-3 OS=Homo sapiens OX=9606 GN=ACTN3 PE=1 SV=2T(853)	Q08043	ACTN3	T(853)	VVASFKILAGDKNYITPEELRRELPAKQAEY	Peptide10239		-0.427644	-0.577047	-0.522641	-1.54392	-0.624105		0						-0.47443	-1.2552	-0.315431	-0.784071	-0.156611									-0.465089	0.398224		0.0320008	0.974672		-0.712958	0.239677		0.0606789	0.94201		0	0.370869	0	0		GO:0006936~muscle contraction;GO:0014728~regulation of the force of skeletal muscle contraction;GO:0014732~skeletal muscle atrophy;GO:0014883~transition between fast and slow fiber;GO:0014894~response to denervation involved in regulation of muscle adaptation;GO:0030049~muscle filament sliding;GO:0031448~positive regulation of fast-twitch skeletal muscle fiber contraction;GO:0042981~regulation of…
>sp|Q92499|DDX1_HUMAN ATP-dependent R helicase DDX1 OS=Homo sapiens OX=9606 GN=DDX1 PE=1 SV=2S(481)	Q92499	DDX1	S(481)	TDDVHAKDNTRPGANSPEMWSEAIKILKGEY	Peptide1024		-0.552634	-0.79254	-0.369925	-0.838505	-0.504972		0						-0.225994	-0.800798	-0.351445	-0.762389	-0.681478									-0.407355	0.143401		0.0286287	0.953307		-0.411133	0.185845		-0.203911	0.532132		0	0.385143	0	0		D-templated;GO:0000245~spliceosomal complex assembly;GO:0006302~double-strand break repair;GO:0006351~transcription;GO:0006355~regulation of transcription;GO:0006388~tR splicing;GO:0006446~regulation of translatiol initiation;GO:0007275~multicellular organism development;GO:0009615~response to virus;GO:0010501~R secondary structure unwinding;GO:0032508~D duplex unwinding;GO:0043330~response to ex…
>sp|Q96HC4|PDLI5_HUMAN PDZ and LIM domain protein 5 OS=Homo sapiens OX=9606 GN=PDLIM5 PE=1 SV=5S(298)	Q96HC4	PDLIM5	S(298)	FRILAQITGTEHLKESEADNTKKANNSQEPS	Peptide10240		-0.581051	-0.965312	-0.447864	-0.358894	-1.24912		0						-0.636422	-0.745981	-0.243957	-1.18166	-0.764079									-0.24691	0.630716		0.262826	0.690844		-0.161541	0.776208		-0.397865	0.486853		0	0.416643	0	0		GO:0051963~regulation of sypse assembly;GO:0061001~regulation of dendritic spine morphogenesis;GO:0061049~cell growth involved in cardiac muscle cell development;GO:0098609~cell-cell adhesion
>sp|Q8WZ42|TITIN_HUMAN Titin OS=Homo sapiens OX=9606 GN=TTN PE=1 SV=4T(1309)	Q8WZ42	TTN	T(1309)	DSRIKNYRILEGMGVTFHCKMSGYPLPKIAW	Peptide10241		0.658376	0.345047	-0.215555	-0.0403997	-0.266081		0	0.251007	0.0251528	0.0808896	-0.125106		0.237745	-0.22574	0.046565	-0.0905881	-0.607142		-0.440392	0.0335629	-0.282055	0.294487	-0.151777			-0.0129628	0.974703		-0.220405	0.600941		-0.0528349	0.894834		-0.401459	0.255463		0	0	0	0.464276		GO:0002576~platelet degranulation;GO:0003300~cardiac muscle hypertrophy;GO:0006936~muscle contraction;GO:0006941~striated muscle contraction;GO:0007076~mitotic chromosome condensation;GO:0018108~peptidyl-tyrosine phosphorylation;GO:0030049~muscle filament sliding;GO:0030240~skeletal muscle thin filament assembly;GO:0030241~skeletal muscle myosin thick filament assembly;GO:0035995~detection of mus…
>sp|A4UGR9|XIRP2_HUMAN Xin actin-binding repeat-containing protein 2 OS=Homo sapiens OX=9606 GN=XIRP2 PE=1 SV=2S(2458)	A4UGR9	XIRP2	S(2458)	ARILGVCSDNQLSTTSPETVAAKRLHHVLAA	Peptide10242		0.0406614	-1.12607	-0.126022	-2.51289	-0.208381		0						-0.251535	-0.931225	-0.410463	-1.53643	0.0983592									-0.923211	0.0939699		-0.162805	0.845512		-1.91923	0.0160096		0.0504262	0.950817		0	0	0	0.400817		GO:0003281~ventricular septum development;GO:0007507~heart development;GO:0030036~actin cytoskeleton organization;GO:0045216~cell-cell junction organization;GO:0055008~cardiac muscle tissue morphogenesis
>sp|Q8N0Z2|ABRA_HUMAN Actin-binding Rho-activating protein OS=Homo sapiens OX=9606 GN=ABRA PE=2 SV=1S(153)	Q8N0Z2	ABRA	S(153)	LEPGQPENDIDRILHSHGSPTRRRKCANLVS	Peptide10243		-1.45696	-1.12525	-0.546476	-0.764195	-0.461899		0						-0.475892	-0.931159	-0.431757	-1.42135	-0.0280403									-0.0617803	0.935283		0.477308	0.526008		-0.126349	0.860175		0.721455	0.29157		0	0.651787	0	0		D-templated;GO:0000060~protein import into nucleus;GO:0006351~transcription;GO:0035025~positive regulation of Rho protein sigl transduction;GO:0045944~positive regulation of transcription from R polymerase II promoter;GO:0051091~positive regulation of sequence-specific D binding transcription factor activity;translocation
>sp|Q8WZ42|TITIN_HUMAN Titin OS=Homo sapiens OX=9606 GN=TTN PE=1 SV=4T(26571)	Q8WZ42	TTN	T(26571)	SSILWSKANKILIADTQMKVSGLDEGLMYEY	Peptide10244		0.136284	0.0276353	0.125193	-0.231673	-0.0452647		0	0.0456191	0.00491596	0.10176	-0.110182		-0.103735	0.110202	0.118438	-0.0679038	-0.16113		0.110242	-0.133555	0.008913	-0.0493358	-0.0795399			-0.0232221	0.901554		0.0286677	0.916841		-0.0974857	0.554322		-0.134727	0.434428		0	0	0	0		GO:0002576~platelet degranulation;GO:0003300~cardiac muscle hypertrophy;GO:0006936~muscle contraction;GO:0006941~striated muscle contraction;GO:0007076~mitotic chromosome condensation;GO:0018108~peptidyl-tyrosine phosphorylation;GO:0030049~muscle filament sliding;GO:0030240~skeletal muscle thin filament assembly;GO:0030241~skeletal muscle myosin thick filament assembly;GO:0035995~detection of mus…
>sp|Q8WZ42|TITIN_HUMAN Titin OS=Homo sapiens OX=9606 GN=TTN PE=1 SV=4T(19836)	Q8WZ42	TTN	T(19836)	KEQLLPPKILMPEQITIKAGKKLRIEAHVYG	Peptide10245		-0.075168	-0.0154821	0.00406898	0.0794245	0.042863		0	0.0516833	0.0458903	0.0533683	-0.000913724		-0.0363078	0.18478	-0.0124022	0.008431	0.00898198		-0.0370764	-0.0136718	0.00791054	0.0384613	0.0875424			0.0889653	0.455877		0.0485049	0.780694		0.0820593	0.521123		0.0717565	0.613747		0	0	0	0		GO:0002576~platelet degranulation;GO:0003300~cardiac muscle hypertrophy;GO:0006936~muscle contraction;GO:0006941~striated muscle contraction;GO:0007076~mitotic chromosome condensation;GO:0018108~peptidyl-tyrosine phosphorylation;GO:0030049~muscle filament sliding;GO:0030240~skeletal muscle thin filament assembly;GO:0030241~skeletal muscle myosin thick filament assembly;GO:0035995~detection of mus…
>sp|Q00872|MYPC1_HUMAN Myosin-binding protein C; slow-type OS=Homo sapiens OX=9606 GN=MYBPC1 PE=1 SV=2T(437)	Q00872	MYBPC1	T(437)	SSAKLSVDLKPLKILTPLTDQTVNLGKEICL	Peptide10246		-0.413234	0.0427907	-0.191019	-0.209132	-0.144668		0	-0.263046	-0.130688	-0.227954	-0.128146		-0.084362	-0.285862	-0.014084	-0.362871	-0.0499671		-0.167283	0.00574388	-0.386426	-0.156143	-0.036348			0.0411261	0.854144		-0.0143346	0.967202		-0.0728055	0.737198		0.0764373	0.755824		0	0	0	0		GO:0007155~cell adhesion;GO:0030049~muscle filament sliding;GO:1903955~positive regulation of protein targeting to mitochondrion
>sp|Q00872|MYPC1_HUMAN Myosin-binding protein C; slow-type OS=Homo sapiens OX=9606 GN=MYBPC1 PE=1 SV=2T(443)	Q00872	MYBPC1	T(443)	VDLKPLKILTPLTDQTVNLGKEICLKCEISE	Peptide10247		-1.41681	-0.964428	-0.761163	-0.842222	-0.942152		0						-0.805459	-1.00438	-0.350914	-0.865131	-0.60513									0.126729	0.78816		0.555094	0.245878		0.257456	0.574679		0.337492	0.488698		0	0.493383	0	0		GO:0007155~cell adhesion;GO:0030049~muscle filament sliding;GO:1903955~positive regulation of protein targeting to mitochondrion
>sp|Q00872|MYPC1_HUMAN Myosin-binding protein C; slow-type OS=Homo sapiens OX=9606 GN=MYBPC1 PE=1 SV=2T(440)	Q00872	MYBPC1	T(440)	KLSVDLKPLKILTPLTDQTVNLGKEICLKCE	Peptide10248		-0.340037	-0.175668	-0.0395185	0.135628	-0.0300882		0	-0.223916	0.136148	0.0525058	-0.123451		0.0723978	0.0329702	-0.14031	0.0260023	0.0226874		-0.0858874	-0.17588	-0.0569647	0.147069	0.0332474			-0.047242	0.804343		0.0632204	0.799421		0.178683	0.303051		0.0639806	0.775632		0	0	0.402011	0		GO:0007155~cell adhesion;GO:0030049~muscle filament sliding;GO:1903955~positive regulation of protein targeting to mitochondrion
>sp|Q8WZ42|TITIN_HUMAN Titin OS=Homo sapiens OX=9606 GN=TTN PE=1 SV=4T(22670)	Q8WZ42	TTN	T(22670)	RIMAEAGISAPSPTSPFYKACDTVFKPGP	Peptide10249		0.101322	0.0796324	0.0599831	-0.187212	-0.192005		0	0.111646	-0.12336	-0.479062	-0.00519205		-0.170433	-0.0622449	0.174481	-0.202523	0.0412414		0.339208	0.207269	0.155882	-0.3023	-0.359472			0.0165514	0.950758		-0.000777792	0.997877		-0.360298	0.0952732		-0.196381	0.403127		0	0	0	0.553947		GO:0002576~platelet degranulation;GO:0003300~cardiac muscle hypertrophy;GO:0006936~muscle contraction;GO:0006941~striated muscle contraction;GO:0007076~mitotic chromosome condensation;GO:0018108~peptidyl-tyrosine phosphorylation;GO:0030049~muscle filament sliding;GO:0030240~skeletal muscle thin filament assembly;GO:0030241~skeletal muscle myosin thick filament assembly;GO:0035995~detection of mus…
>sp|Q9UJY1|HSPB8_HUMAN Heat shock protein beta-8 OS=Homo sapiens OX=9606 GN=HSPB8 PE=1 SV=1S(24)	Q9UJY1	HSPB8	S(24)	SCHYPSRLRRDPFRDSPLSSRLLDDGFGMDP	Peptide1025		0.414828	-0.553377	-0.0601683	0.383456	0.409611		0	-0.33787	-0.398588	0.204487	0.62857		0.698385	-0.193111	-0.665984	0.801327	-0.249512		0.121094	0.034071	-0.192915	0.386037	0.190199			-0.571149	0.0746933		-0.637991	0.0742307		0.13525	0.734983		-0.0638598	0.89796		0.507403	0	0	0		GO:1900034~regulation of cellular response to heat
>sp|Q8WZ42|TITIN_HUMAN Titin OS=Homo sapiens OX=9606 GN=TTN PE=1 SV=4S(23652)	Q8WZ42	TTN	S(23652)	RIMAVNKYGVGEPLESEPVVAKNPFVVPDAP	Peptide10250		0.0465549	0.00825766	0.0321183	0.0768425	-0.119118		0	0.062546	-0.0812609	0.0507237	-0.0402077		-0.20368	-0.0295938	0.151868	-0.000226603	-0.0839025		2.45842e-05	-0.103299	-0.0165655	0.064462	-0.0540611			0.0237528	0.886556		0.0608152	0.750871		0.0872255	0.55339		-0.0350473	0.850839		0	0	0	0		GO:0002576~platelet degranulation;GO:0003300~cardiac muscle hypertrophy;GO:0006936~muscle contraction;GO:0006941~striated muscle contraction;GO:0007076~mitotic chromosome condensation;GO:0018108~peptidyl-tyrosine phosphorylation;GO:0030049~muscle filament sliding;GO:0030240~skeletal muscle thin filament assembly;GO:0030241~skeletal muscle myosin thick filament assembly;GO:0035995~detection of mus…
>sp|Q8WZ42|TITIN_HUMAN Titin OS=Homo sapiens OX=9606 GN=TTN PE=1 SV=4S(26749)	Q8WZ42	TTN	S(26749)	LKIDIAGRPLPVISWAKDGIEIEERARTE	Peptide10251		0.314899	-0.0740692	-0.384379	0.143697	0.177675		0	-0.0953982	0.185155	-0.123069	0.0707275		-0.216103	-0.122595	0.394159	-0.200494	-0.0867884		-0.0404266	0.11195	0.00533684	-0.0467329	-0.0176736			-0.0596204	0.83806		0.0354755	0.93953		-0.0712423	0.808903		0.0213926	0.956253		0	0	0	0		GO:0002576~platelet degranulation;GO:0003300~cardiac muscle hypertrophy;GO:0006936~muscle contraction;GO:0006941~striated muscle contraction;GO:0007076~mitotic chromosome condensation;GO:0018108~peptidyl-tyrosine phosphorylation;GO:0030049~muscle filament sliding;GO:0030240~skeletal muscle thin filament assembly;GO:0030241~skeletal muscle myosin thick filament assembly;GO:0035995~detection of mus…
>sp|P13533|MYH6_HUMAN Myosin-6 OS=Homo sapiens OX=9606 GN=MYH6 PE=1 SV=5T(447)	P13533	MYH6	T(447)	VYEKMFNWMVTRITLETKQPRQYFIGVLD	Peptide10252		-0.701792	0.199446	-0.15894	0.0616488	-0.516446		0	-0.100979	-0.88487	-0.949418	0.194924		0.0121832	-0.0546601	-0.0308869	-0.321193	-0.479031		0.00453689	0.923716	-0.0475139	-0.0932572	-0.900282			0.413149	0.396469		-0.109285	0.897343		-0.154287	0.789191		-0.253941	0.674703		0	0	0.314172	0		GO:0001701~in utero embryonic development;GO:0002026~regulation of the force of heart contraction;GO:0002027~regulation of heart rate;GO:0006470~protein dephosphorylation;GO:0006936~muscle contraction;GO:0006941~striated muscle contraction;GO:0007512~adult heart development;GO:0007522~visceral muscle development;GO:0008016~regulation of heart contraction;GO:0008217~regulation of blood pressure;GO…
>sp|Q8WZ42|TITIN_HUMAN Titin OS=Homo sapiens OX=9606 GN=TTN PE=1 SV=4S(33711)	Q8WZ42	TTN	S(33711)	SADGTYELKINNLTESDQGEYVCEISGEGGT	Peptide10253		-0.195571	-0.623041	-0.222026	-0.0119491	0.0817188		0	-0.373873	-0.0818654	-0.687017	0.117809		0.192651	-0.137872	-0.259941	-0.176963	-0.284471		-0.146734	0.000950883	0.0835605	-0.570618	0.0403334			-0.246045	0.368792		-0.0826546	0.851258		-0.324223	0.26719		0.0262611	0.951672		0	0	0	0.357517		GO:0002576~platelet degranulation;GO:0003300~cardiac muscle hypertrophy;GO:0006936~muscle contraction;GO:0006941~striated muscle contraction;GO:0007076~mitotic chromosome condensation;GO:0018108~peptidyl-tyrosine phosphorylation;GO:0030049~muscle filament sliding;GO:0030240~skeletal muscle thin filament assembly;GO:0030241~skeletal muscle myosin thick filament assembly;GO:0035995~detection of mus…
>sp|Q9Y623|MYH4_HUMAN Myosin-4 OS=Homo sapiens OX=9606 GN=MYH4 PE=2 SV=2T(452)	Q9Y623	MYH4	T(452)	KMFLWMVTRINQQLDTKQPRQYFIGVLDIAG	Peptide10254		0.178697	-0.117958	-0.0316013	-0.0920991	0.0290611		0	-0.122279	0.186996	-0.108873	-0.0569684		-0.0606071	-0.223711	0.0863891	0.0635494	-0.0349536		0.263571	-0.10585	-0.191081	-0.148912	0.0476968			-0.237865	0.120362		-0.0827397	0.711555		-0.166999	0.329847		-0.0992064	0.612445		0	0	0	0.518678		GO:0006936~muscle contraction;GO:0014823~response to activity;GO:0030048~actin filament-based movement;GO:0030049~muscle filament sliding;GO:0046034~ATP metabolic process
>sp|P20929|NEBU_HUMAN Nebulin OS=Homo sapiens OX=9606 GN=NEB PE=1 SV=5S(4416)	P20929	NEB	S(4416)	RSVVDPPEIVLAKINSVNQSDVKYKETFNKA	Peptide10255		-1.74414	-0.79325	-0.217502	-1.77274	0.163186		0						-0.784565	-0.823983	0.0775477	-0.601062	-0.0624414									0.455736	0.536167		1.19438	0.150183		0.0774491	0.92966		1.31472	0.117611		0	0.766689	0	0		GO:0007517~muscle organ development;GO:0007525~somatic muscle development;GO:0030049~muscle filament sliding;GO:0030832~regulation of actin filament length
>sp|Q8WZ42|TITIN_HUMAN Titin OS=Homo sapiens OX=9606 GN=TTN PE=1 SV=4T(32265)	Q8WZ42	TTN	T(32265)	IFEFISGLDIFERINTSAFELNEREIVSYVH	Peptide10256		-0.397061	-0.0870827	0.163281	0.164948	-0.0879062		0	-0.0231925	-0.0845711	-0.220441	0.075105		-0.146361	0.12324	0.0597219	0.121961	-0.253938		0.115863	0.197041	-0.312807	-0.10631	0.125432			0.159391	0.498337		0.0632961	0.866425		0.0969289	0.715413		0.0715628	0.82135		0	0	0	0		GO:0002576~platelet degranulation;GO:0003300~cardiac muscle hypertrophy;GO:0006936~muscle contraction;GO:0006941~striated muscle contraction;GO:0007076~mitotic chromosome condensation;GO:0018108~peptidyl-tyrosine phosphorylation;GO:0030049~muscle filament sliding;GO:0030240~skeletal muscle thin filament assembly;GO:0030241~skeletal muscle myosin thick filament assembly;GO:0035995~detection of mus…
>sp|Q8WZ42|TITIN_HUMAN Titin OS=Homo sapiens OX=9606 GN=TTN PE=1 SV=4S(32266)	Q8WZ42	TTN	S(32266)	FEFISGLDIFERINTSAFELNEREIVSYVHQ	Peptide10257		-0.245812	-0.583546	-0.410127	-0.69256	-0.509332		0	-0.12247	-0.175217	0.104539	-1.22763		-0.661898	-0.223825	-0.571106	-0.205976	-0.176971		-0.0318252	-1.48949	-0.20523	-1.0535	0.0542652			-0.369949	0.493343		-0.105536	0.910475		-0.226989	0.709742		-0.230033	0.738126		0	0	0	0		GO:0002576~platelet degranulation;GO:0003300~cardiac muscle hypertrophy;GO:0006936~muscle contraction;GO:0006941~striated muscle contraction;GO:0007076~mitotic chromosome condensation;GO:0018108~peptidyl-tyrosine phosphorylation;GO:0030049~muscle filament sliding;GO:0030240~skeletal muscle thin filament assembly;GO:0030241~skeletal muscle myosin thick filament assembly;GO:0035995~detection of mus…
>sp|Q5VWP3|MLIP_HUMAN Muscular LM-interacting protein OS=Homo sapiens OX=9606 GN=MLIP PE=1 SV=3T(70)	Q5VWP3	MLIP	T(70)	FLVKIPEESSDKSPETVNRSKSNDYLTLG	Peptide10258		-0.237732	-0.424318	0.121768	-0.554225	0.523063		0	-0.562415	0.440924	-0.0485406	0.0588783		0.0437047	-0.126276	0.208841	-0.160125	0.00461531		0.0206263	-0.423176	0.276851	-0.435024	0.321516			-0.340696	0.126428		0.305446	0.232958		-0.256128	0.301043		0.270369	0.295074		0.316266	0	0	0
>sp|Q8WZ42|TITIN_HUMAN Titin OS=Homo sapiens OX=9606 GN=TTN PE=1 SV=4S(31979)	Q8WZ42	TTN	S(31979)	VHALRGEVVSIKIPFSGKPDPVITWQKGQDL	Peptide10259		-0.062964	-0.0674596	0.0887675	-0.0586409	0.0113659		0	-0.188277	0.000156993	0.131902	-0.00239774		-0.0534178	-0.0494819	0.201778	-0.0848408	-0.195495		-0.0559701	-0.0149098	-0.0729662	0.0571701	-0.0225865			-0.0369441	0.825261		0.0975221	0.60153		0.0544855	0.745062		-0.00919047	0.967871		0	0	0	0		GO:0002576~platelet degranulation;GO:0003300~cardiac muscle hypertrophy;GO:0006936~muscle contraction;GO:0006941~striated muscle contraction;GO:0007076~mitotic chromosome condensation;GO:0018108~peptidyl-tyrosine phosphorylation;GO:0030049~muscle filament sliding;GO:0030240~skeletal muscle thin filament assembly;GO:0030241~skeletal muscle myosin thick filament assembly;GO:0035995~detection of mus…
>sp|Q16512|PKN1_HUMAN Serine/threonine-protein kise N1 OS=Homo sapiens OX=9606 GN=PKN1 PE=1 SV=2S(573)	Q16512	PKN1	S(573)	DSDSSPQKSSRDPPSSPSSLSSPIQESTAPE	Peptide1026		-0.567965	-0.674137	-0.605767	-0.75808	-0.658863		0						-0.61163	-0.779458	-0.146106	-0.615679	-0.50152									-0.137	0.687351		0.213861	0.604866		-0.097082	0.793273		0.0096064	0.984172		0	0.672782	0	0		D-templated;GO:0001782~B cell homeostasis;GO:0001783~B cell apoptotic process;GO:0002634~regulation of germil center formation;GO:0002637~regulation of immunoglobulin production;GO:0003014~rel system process;GO:0006351~transcription;GO:0006357~regulation of transcription from R polymerase II promoter;GO:0006468~protein phosphorylation;GO:0006469~negative regulation of protein kise activity;GO:000…
>sp|Q8WZ42|TITIN_HUMAN Titin OS=Homo sapiens OX=9606 GN=TTN PE=1 SV=4T(30864)	Q8WZ42	TTN	T(30864)	VIECRSSIRIPGPPETLQIFDVSRDGMTLTW	Peptide10260		-0.382027	0.0614245	0.162591	-0.054584	0.116778		0	0.0231483	0.205301	-0.169784	0.0599736		-0.15332	0.351731	0.183848	0.0497282	-0.0327887		0.210723	0.0106501	0.0820046	0.0321617	0.0445866			0.192894	0.300472		0.239592	0.251157		0.0455363	0.844089		0.128293	0.574407		0	0.616265	0	0		GO:0002576~platelet degranulation;GO:0003300~cardiac muscle hypertrophy;GO:0006936~muscle contraction;GO:0006941~striated muscle contraction;GO:0007076~mitotic chromosome condensation;GO:0018108~peptidyl-tyrosine phosphorylation;GO:0030049~muscle filament sliding;GO:0030240~skeletal muscle thin filament assembly;GO:0030241~skeletal muscle myosin thick filament assembly;GO:0035995~detection of mus…
>sp|Q8WZ42|TITIN_HUMAN Titin OS=Homo sapiens OX=9606 GN=TTN PE=1 SV=4S(32984)	Q8WZ42	TTN	S(32984)	RITDQYRPKWRIPKLSQDDLEIVRPARRRTP	Peptide10261		-0.427795	-0.0701897	0.164884	0.0488733	0.00218184		0	-0.211375	0.0278758	-0.0314285	0.0194857		-0.0489077	0.04194	0.172033	-0.0503087	-0.0303769		0.0110947	0.188915	0.0447674	-0.0294537	-0.0421792			0.103724	0.570911		0.218792	0.25175		0.100823	0.605184		0.10368	0.622702		0	0.595979	0	0		GO:0002576~platelet degranulation;GO:0003300~cardiac muscle hypertrophy;GO:0006936~muscle contraction;GO:0006941~striated muscle contraction;GO:0007076~mitotic chromosome condensation;GO:0018108~peptidyl-tyrosine phosphorylation;GO:0030049~muscle filament sliding;GO:0030240~skeletal muscle thin filament assembly;GO:0030241~skeletal muscle myosin thick filament assembly;GO:0035995~detection of mus…
>sp|Q9H1H1|GTSFL_HUMAN Gametocyte-specific factor 1-like OS=Homo sapiens OX=9606 GN=GTSF1L PE=2 SV=1Y(24);S(28)	Q9H1H1	GTSF1L	Y(24);S(28)	CPYDPHHRIPLSRFQYHLASCRRKNPKKAKK;PHHRIPLSRFQYHLASCRRKNPKKAKKMATC	Peptide10262		-0.878385	-0.582587	-0.490136	-1.3405	-0.485716		0						-0.875487	-0.999419	-0.295629	-0.70582	-0.0232333									0.0859329	0.874713		0.484054	0.366534		-0.146225	0.782006		0.622461	0.23445		0	0.733388	0	0
>sp|Q86TC9|MYPN_HUMAN Myopalladin OS=Homo sapiens OX=9606 GN=MYPN PE=1 SV=2S(386)	Q86TC9	MYPN	S(386)	NKEEMNRIQKPNEVSSPPTTSAVIPPAVPQA	Peptide10263		-0.227473	-0.0265378	0.491232	-0.460893	1.30855		0	-0.147136	0.49229	0.19203	0.867366		-0.0042914	0.0589172	0.664603	-0.0926547	0.490887		-0.309881	0.42029	0.41835	-0.824145	1.33793			0.211795	0.560031		0.65203	0.0738348		-0.161004	0.684727		1.1366	0.00551847		0	0.453542	0	0		GO:0045214~sarcomere organization
>tr||G5EA03|G5EA03_HUMAN LIM and calponin homology domains-containing protein 1 OS=Homo sapiens OX=9606 GN=LIMCH1 PE=1 SV=1S(512)	G5EA03	LIMCH1	S(512)	EEVICHGSKIQMDSVSPVSAATSSLKGHQIF	Peptide10264		-0.767325	-0.414808	-0.519948	-1.67863	-0.297822		0						-0.775371	-0.957074	-0.174469	-1.12654	-0.225711									0.0854075	0.868218		0.42414	0.410547		-0.631238	0.193481		0.509582	0.300753		0	0.60176	0	0		GO:0031032~actomyosin structure organization
>sp|P20929|NEBU_HUMAN Nebulin OS=Homo sapiens OX=9606 GN=NEB PE=1 SV=5S(4059)	P20929	NEB	S(4059)	REYRLDWAKWKAKIQSPVDMLSILHSKNSQA	Peptide10265		0.0856755	0.16431	0.0760209	-0.582446	0.0450846		0	0.0979313	-0.0696457	-0.0818583	-0.0676496		0.126838	0.0872267	-0.136538	-0.301253	0.0319356		-0.0275424	-0.0120346	0.0529192	-0.349476	0.00158578			0.0381156	0.845895		-0.0655535	0.788465		-0.375001	0.0343513		-0.0435036	0.848361		0	0	0	0.456768		GO:0007517~muscle organ development;GO:0007525~somatic muscle development;GO:0030049~muscle filament sliding;GO:0030832~regulation of actin filament length
>sp|Q8WZ42|TITIN_HUMAN Titin OS=Homo sapiens OX=9606 GN=TTN PE=1 SV=4S(2093)	Q8WZ42	TTN	S(2093)	PKIFERIQSQTVGQGSDAHFRVRVVGKPDPE	Peptide10266		0.240745	0.0839671	-0.0329054	-0.0240619	-0.14609		0	0.109707	-0.0164157	-0.209156	0.00253036		0.00152093	-0.164311	0.0516688	-0.103096	-0.0310403		0.0127835	0.0406712	-0.0310863	-0.0393646	-0.112971			-0.0462537	0.78125		-0.070947	0.727521		-0.157682	0.302372		-0.135655	0.417619		0	0	0	0		GO:0002576~platelet degranulation;GO:0003300~cardiac muscle hypertrophy;GO:0006936~muscle contraction;GO:0006941~striated muscle contraction;GO:0007076~mitotic chromosome condensation;GO:0018108~peptidyl-tyrosine phosphorylation;GO:0030049~muscle filament sliding;GO:0030240~skeletal muscle thin filament assembly;GO:0030241~skeletal muscle myosin thick filament assembly;GO:0035995~detection of mus…
>sp|Q8WZ42|TITIN_HUMAN Titin OS=Homo sapiens OX=9606 GN=TTN PE=1 SV=4S(2086)	Q8WZ42	TTN	S(2086)	LSPSMEAPKIFERIQSQTVGQGSDAHFRVRV	Peptide10267		-0.583388	-0.591454	-0.512916	-0.585958	-1.00525		0	-0.53913	-0.537936	-1.00039	-0.966789		-0.748907	-0.7258	-0.203985	-0.8134	-0.441005		0.20832	-0.851355	-0.617141	-0.980629	-0.689097			-0.395941	0.191113		-0.187001	0.663083		-0.5641	0.0925684		-0.494543	0.143973		0	0	0	0.515178		GO:0002576~platelet degranulation;GO:0003300~cardiac muscle hypertrophy;GO:0006936~muscle contraction;GO:0006941~striated muscle contraction;GO:0007076~mitotic chromosome condensation;GO:0018108~peptidyl-tyrosine phosphorylation;GO:0030049~muscle filament sliding;GO:0030240~skeletal muscle thin filament assembly;GO:0030241~skeletal muscle myosin thick filament assembly;GO:0035995~detection of mus…
>sp|Q8WZ42|TITIN_HUMAN Titin OS=Homo sapiens OX=9606 GN=TTN PE=1 SV=4Y(31019)	Q8WZ42	TTN	Y(31019)	HEWTKCNTTPTKIREYTLTHLPQGAEYRFRV	Peptide10268		-1.34356	-0.681033	-0.376953	-0.663112	-0.783649		0						-0.496373	-0.969066	-0.463358	-0.741751	0.227129									0.094915	0.902021		0.499809	0.527631		0.217533	0.764487		0.641705	0.380405		0	0.536671	0	0		GO:0002576~platelet degranulation;GO:0003300~cardiac muscle hypertrophy;GO:0006936~muscle contraction;GO:0006941~striated muscle contraction;GO:0007076~mitotic chromosome condensation;GO:0018108~peptidyl-tyrosine phosphorylation;GO:0030049~muscle filament sliding;GO:0030240~skeletal muscle thin filament assembly;GO:0030241~skeletal muscle myosin thick filament assembly;GO:0035995~detection of mus…
>sp|P25391|LAMA1_HUMAN Laminin subunit alpha-1 OS=Homo sapiens OX=9606 GN=LAMA1 PE=1 SV=2S(242)	P25391	LAMA1	S(242)	RLQRIRTLDLMTLSHREPKELDPIVTRRY	Peptide10269		-1.02738	-0.97181	-0.232005	-1.11078	-0.75859		0						-0.182359	-0.801492	-0.520377	-1.35674	-0.287752									-0.281783	0.596738		0.228678	0.750871		-0.628889	0.264273		0.0816971	0.913275		0	0.540274	0	0		GO:0007155~cell adhesion;GO:0007166~cell surface receptor sigling pathway;GO:0030155~regulation of cell adhesion;GO:0030198~extracellular matrix organization;GO:0030334~regulation of cell migration;GO:0045995~regulation of embryonic development
>sp|P18206|VINC_HUMAN Vinculin OS=Homo sapiens OX=9606 GN=VCL PE=1 SV=4S(290)	P18206	VCL	S(290)	SKLNQAKGWLRDPSASPGDAGEQAIRQILDE	Peptide1027		-0.00295688	0.193075	-0.102491	0.281389	-0.320697		0	0.143496	0.131691	-0.419813	-0.0323548		-0.0696732	-0.202753	0.0759377	-0.21158	0.0778999		0.00439713	0.286809	-0.508253	0.0466319	0.0283344			0.122215	0.677974		-0.0837209	0.845512		-0.0587847	0.859403		-0.0446463	0.913095		0	0	0	0		GO:0002009~morphogenesis of an epithelium;GO:0002576~platelet degranulation;GO:0006928~movement of cell or subcellular component;GO:0006936~muscle contraction;GO:0007155~cell adhesion;GO:0007160~cell-matrix adhesion;GO:0030032~lamellipodium assembly;GO:0030334~regulation of cell migration;GO:0030336~negative regulation of cell migration;GO:0034333~adherens junction assembly;GO:0034394~protein loc…
>sp|Q0ZGT2|NEXN_HUMAN Nexilin OS=Homo sapiens OX=9606 GN=NEXN PE=1 SV=1S(218)	Q0ZGT2	NEXN	S(218)	KYEEDKRIRYEEQRPSLKEAKCLSLVMDDEI	Peptide10270		-0.0248286	-1.92147	-0.682651	-0.80515	-1.55857		0	-1.61679	-0.875141	-0.843875	-1.59939		-0.74629	-1.60148	-0.606231	-1.26381	-0.811474		0.480678	-1.86034	-1.29142	-1.33206	-1.09313			-1.67741	0.000214762		-0.791252	0.0560211		-0.988614	0.0228468		-1.19303	0.00813507		0.461809	0	0	0		GO:0030334~regulation of cell migration;GO:0048739~cardiac muscle fiber development;GO:0051493~regulation of cytoskeleton organization
>sp|Q8WYP5|ELYS_HUMAN Protein ELYS OS=Homo sapiens OX=9606 GN=AHCTF1 PE=1 SV=3S(1232)	Q8WYP5	AHCTF1	S(1232)	PSPGRSPQRLKETRISFVEEDVHPKWIPGAA	Peptide10271		-0.395356	0.618792	0.480674	-0.25896	0.0239414		0	0.52711	0.218238	-0.467552	0.192346		-0.179115	0.266442	0.748031	-0.131699	-0.550917		-0.440318	0.684511	0.413658	-0.502954	0.202037			0.777911	0.00488335		0.718848	0.0160958		-0.0865941	0.796069		0.220549	0.502095		0	0.462985	0	0		D-templated;GO:0000910~cytokinesis;GO:0006355~regulation of transcription;GO:0007062~sister chromatid cohesion;GO:0015031~protein transport;GO:0051028~mR transport;GO:0051292~nuclear pore complex assembly
>sp|Q8WZ42|TITIN_HUMAN Titin OS=Homo sapiens OX=9606 GN=TTN PE=1 SV=4Y(30535)	Q8WZ42	TTN	Y(30535)	KTLYRISGLVEGTMYYFRVLPENIYGIGEPC	Peptide10272		-0.674258	-0.44229	-0.161981	-1.10723	-1.12513		0						-0.477234	-0.78542	-0.21526	-1.0956	-1.05841									-0.0381088	0.912159		0.387125	0.234176		-0.525668	0.111062		-0.516025	0.120908		0	0.385988	0	0		GO:0002576~platelet degranulation;GO:0003300~cardiac muscle hypertrophy;GO:0006936~muscle contraction;GO:0006941~striated muscle contraction;GO:0007076~mitotic chromosome condensation;GO:0018108~peptidyl-tyrosine phosphorylation;GO:0030049~muscle filament sliding;GO:0030240~skeletal muscle thin filament assembly;GO:0030241~skeletal muscle myosin thick filament assembly;GO:0035995~detection of mus…
>sp|Q8WZ42|TITIN_HUMAN Titin OS=Homo sapiens OX=9606 GN=TTN PE=1 SV=4S(7318)	Q8WZ42	TTN	S(7318)	AKQGESIQLECKISGSPEIKVSWFRNDSELH	Peptide10273		-0.0703251	0.0442831	0.00298579	-0.147369	-0.0704479		0	-0.146387	-0.142947	0.136636	-0.0897839		-0.0161002	-0.246986	0.0354853	-0.114111	0.00128089		-0.0736119	0.0652139	-0.141299	-0.100374	-0.0468196			-0.0309597	0.867422		-0.0214345	0.941051		-0.0162954	0.932659		-0.0114333	0.962026		0	0	0	0		GO:0002576~platelet degranulation;GO:0003300~cardiac muscle hypertrophy;GO:0006936~muscle contraction;GO:0006941~striated muscle contraction;GO:0007076~mitotic chromosome condensation;GO:0018108~peptidyl-tyrosine phosphorylation;GO:0030049~muscle filament sliding;GO:0030240~skeletal muscle thin filament assembly;GO:0030241~skeletal muscle myosin thick filament assembly;GO:0035995~detection of mus…
>sp|Q8WZ42|TITIN_HUMAN Titin OS=Homo sapiens OX=9606 GN=TTN PE=1 SV=4S(7316)	Q8WZ42	TTN	S(7316)	KVAKQGESIQLECKISGSPEIKVSWFRNDSE	Peptide10274		-0.786142	-0.293825	-0.175999	-0.240114	-0.479114		0	-0.464302	0.0580127	0.299144	-0.981004		-0.283748	-0.505236	-0.225052	-0.224301	-0.15425		-0.391399	-0.502992	-0.530254	-0.654299	0.162033			-0.0762664	0.87175		0.146999	0.801302		0.16043	0.720937		0.00223879	0.996204		0	0	0.484817	0		GO:0002576~platelet degranulation;GO:0003300~cardiac muscle hypertrophy;GO:0006936~muscle contraction;GO:0006941~striated muscle contraction;GO:0007076~mitotic chromosome condensation;GO:0018108~peptidyl-tyrosine phosphorylation;GO:0030049~muscle filament sliding;GO:0030240~skeletal muscle thin filament assembly;GO:0030241~skeletal muscle myosin thick filament assembly;GO:0035995~detection of mus…
>sp|Q8WWI1|LMO7_HUMAN LIM domain only protein 7 OS=Homo sapiens OX=9606 GN=LMO7 PE=1 SV=3T(1048)	Q8WWI1	LMO7	T(1048)	RSQDQFSDMRISINQTPGKSLDFGFTIKWDI	Peptide10275		-0.0745215	0.525261	-0.218484	0.0402872	0.119538		0	0.26728	-0.0546592	-0.236429	0.238664		0.171516	-0.0681911	-0.156938	0.0141797	0.527084		0.0355505	0.511235	-0.00528905	0.089054	-0.0052632			0.27576	0.206002		-0.141979	0.640477		-0.0563633	0.838647		0.186869	0.481256		0	0	0.306954	0		GO:0016337~single organismal cell-cell adhesion;GO:0016567~protein ubiquitition;GO:0023051~regulation of sigling;GO:0030155~regulation of cell adhesion
>sp|O43707|ACTN4_HUMAN Alpha-actinin-4 OS=Homo sapiens OX=9606 GN=ACTN4 PE=1 SV=2S(375)	O43707	ACTN4	S(375)	LQTKLRLSNRPAFMPSEGKMVSDINNGWQHL	Peptide10276		-0.129838	0.19568	0.03948	0.0766161	-0.0344104		0	0.0360982	0.0510698	0.0512117	0.0306089		0.096583	0.0525941	0.0917929	-0.00612757	-0.116937		-0.1844	0.194629	0.00312922	0.206275	-0.0446883			0.174164	0.192368		0.100782	0.575676		0.136408	0.356581		0.0130571	0.952347		0	0	0	0		GO:0001666~response to hypoxia;GO:0002576~platelet degranulation;GO:0015031~protein transport;GO:0030050~vesicle transport along actin filament;GO:0030335~positive regulation of cell migration;GO:0032417~positive regulation of sodium:proton antiporter activity;GO:0035357~peroxisome proliferator activated receptor sigling pathway;GO:0042981~regulation of apoptotic process;GO:0048384~retinoic acid …
>sp|P35609|ACTN2_HUMAN Alpha-actinin-2 OS=Homo sapiens OX=9606 GN=ACTN2 PE=1 SV=1S(596)	P35609	ACTN2	S(596)	EVEKVIQSYNIRISSSNPYSTVTMDELRTKW	Peptide10277		0.135686	0.114723	0.12502	0.268392	-0.0746335		0	0.388542	0.038195	-0.369122	0.174846		-0.0612456	0.262809	0.0154676	0.406411	0.014397		0.430248	0.125494	0.284469	0.148292	-0.198155			0.0967197	0.734437		-0.0103844	0.981227		-0.012679	0.968724		-0.147059	0.633659		0	0	0	0.504911		GO:0000165~MAPK cascade;GO:0002576~platelet degranulation;GO:0007155~cell adhesion;GO:0030035~microspike assembly;GO:0030049~muscle filament sliding;GO:0042391~regulation of membrane potential;GO:0042981~regulation of apoptotic process;GO:0043267~negative regulation of potassium ion transport;GO:0043268~positive regulation of potassium ion transport;GO:0043547~positive regulation of GTPase activi…
>sp|P35609|ACTN2_HUMAN Alpha-actinin-2 OS=Homo sapiens OX=9606 GN=ACTN2 PE=1 SV=1S(595)	P35609	ACTN2	S(595)	NEVEKVIQSYNIRISSSNPYSTVTMDELRTK	Peptide10278		-0.305911	0.080964	0.185056	0.314312	0.0620378		0	0.0134768	0.0394678	-0.0248807	0.268611		0.101574	0.210146	0.0844699	0.0363554	0.0708953		-0.10647	0.31325	0.009295	0.305985	0.0965487			0.232161	0.186044		0.157274	0.485683		0.235645	0.227539		0.202225	0.322204		0	0	0.646108	0		GO:0000165~MAPK cascade;GO:0002576~platelet degranulation;GO:0007155~cell adhesion;GO:0030035~microspike assembly;GO:0030049~muscle filament sliding;GO:0042391~regulation of membrane potential;GO:0042981~regulation of apoptotic process;GO:0043267~negative regulation of potassium ion transport;GO:0043268~positive regulation of potassium ion transport;GO:0043547~positive regulation of GTPase activi…
>sp|P35609|ACTN2_HUMAN Alpha-actinin-2 OS=Homo sapiens OX=9606 GN=ACTN2 PE=1 SV=1T(603)	P35609	ACTN2	T(603)	SYNIRISSSNPYSTVTMDELRTKWDKVKQLV	Peptide10279		-0.0385999	0.0952742	0.102397	0.34689	-0.00969069		0	0.134835	0.124424	0.0614916	0.0995096		0.0201877	0.242555	0.119551	0.162302	0.0236864		0.0284367	0.193432	0.151251	0.335845	-0.0629102			0.164018	0.197273		0.121899	0.443549		0.224126	0.111062		0.0101426	0.961502		0	0	0	0		GO:0000165~MAPK cascade;GO:0002576~platelet degranulation;GO:0007155~cell adhesion;GO:0030035~microspike assembly;GO:0030049~muscle filament sliding;GO:0042391~regulation of membrane potential;GO:0042981~regulation of apoptotic process;GO:0043267~negative regulation of potassium ion transport;GO:0043268~positive regulation of potassium ion transport;GO:0043547~positive regulation of GTPase activi…
>sp|Q7L9B9|EEPD1_HUMAN Endonuclease/exonuclease/phosphatase family domain-containing protein 1 OS=Homo sapiens OX=9606 GN=EEPD1 PE=1 SV=2S(21)	Q7L9B9	EEPD1	S(21)	GCHRSIPRDPSDLSHSRKFSAACNFSNILVN	Peptide1028		0.0164834	-0.481072	-0.125811	-0.383763	-0.569495		0	-0.373146	-0.418695	-0.207287	-0.448466		-0.130172	-0.352046	-0.344426	-0.423074	-0.461198		-0.041348	-0.852141	-0.480467	-0.136502	-0.333287			-0.475842	0.0105201		-0.303591	0.142666		-0.248897	0.226681		-0.414352	0.0474564		0.454945	0	0	0		GO:0006281~D repair
>sp|P35609|ACTN2_HUMAN Alpha-actinin-2 OS=Homo sapiens OX=9606 GN=ACTN2 PE=1 SV=1S(594)	P35609	ACTN2	S(594)	QNEVEKVIQSYNIRISSSNPYSTVTMDELRT	Peptide10280		-0.325472	-0.252015	-0.012003	-0.0966773	-0.0142596		0	-0.0472237	0.103528	0.113104	-0.341921		-0.148887	0.0359611	-0.0690526	-0.0877717	-0.069342		-0.380305	-0.30815	0.209576	-0.518119	0.277839			0.0708094	0.804767		0.271679	0.331033		0.0663002	0.823627		0.176745	0.546683		0	0.745736	0	0		GO:0000165~MAPK cascade;GO:0002576~platelet degranulation;GO:0007155~cell adhesion;GO:0030035~microspike assembly;GO:0030049~muscle filament sliding;GO:0042391~regulation of membrane potential;GO:0042981~regulation of apoptotic process;GO:0043267~negative regulation of potassium ion transport;GO:0043268~positive regulation of potassium ion transport;GO:0043547~positive regulation of GTPase activi…
>sp|P35609|ACTN2_HUMAN Alpha-actinin-2 OS=Homo sapiens OX=9606 GN=ACTN2 PE=1 SV=1T(609)	P35609	ACTN2	T(609)	SSSNPYSTVTMDELRTKWDKVKQLVPIRDQS	Peptide10281		-0.0226637	0.31074	0.0245232	0.360616	0.15827		0	0.505692	0.173483	0.316647	-0.121972		-0.0863796	0.241833	0.191411	0.617838	0.0829726		-0.0989753	0.603337	0.756357	-0.33596	0.0612527			0.467405	0.0939699		0.338448	0.302982		0.29179	0.349977		0.0971355	0.811329		0	0	0.433685	0		GO:0000165~MAPK cascade;GO:0002576~platelet degranulation;GO:0007155~cell adhesion;GO:0030035~microspike assembly;GO:0030049~muscle filament sliding;GO:0042391~regulation of membrane potential;GO:0042981~regulation of apoptotic process;GO:0043267~negative regulation of potassium ion transport;GO:0043268~positive regulation of potassium ion transport;GO:0043547~positive regulation of GTPase activi…
>sp|P02545|LM_HUMAN Prelamin-A/C OS=Homo sapiens OX=9606 GN=LM PE=1 SV=1S(66)	P02545	LM	S(66)	SLETEGLRLRITESEEVVSREVSGIKAAY	Peptide10282		-0.0445484	0.235151	0.314988	0.161416	-0.321774		0	0.211986	-0.105839	-0.332099	0.186137		-0.159987	-0.148653	0.25543	-0.319626	0.286425		0.0222331	0.253863	-0.15536	0.0864096	-0.0297222			0.183662	0.498495		0.12288	0.745766		-0.0553993	0.86296		0.0758419	0.835739		0	0.429716	0	0		GO:0007077~mitotic nuclear envelope disassembly;GO:0007084~mitotic nuclear envelope reassembly;GO:0007517~muscle organ development;GO:0030334~regulation of cell migration;GO:0030951~establishment or maintence of microtubule cytoskeleton polarity;GO:0034504~protein localization to nucleus;GO:0035105~sterol regulatory element binding protein import into nucleus;GO:0036498~IRE1-mediated unfolded pro…
>sp|Q8WZ42|TITIN_HUMAN Titin OS=Homo sapiens OX=9606 GN=TTN PE=1 SV=4T(26263)	Q8WZ42	TTN	T(26263)	SDGGSKITGYVVEMQTKGSEKWSTCTQVKTL	Peptide10283		0.245826	0.0988275	0.186956	-0.166171	0.0447474		0	0.173011	0.108808	-0.0415489	0.00717458		0.136171	-0.054558	-0.0836084	0.212534	0.237365		0.297214	0.0634359	0.250645	-0.184786	-0.0344696			-0.0996236	0.610865		-0.0541028	0.854375		-0.214796	0.270983		-0.106098	0.637647		0	0	0	0.727851		GO:0002576~platelet degranulation;GO:0003300~cardiac muscle hypertrophy;GO:0006936~muscle contraction;GO:0006941~striated muscle contraction;GO:0007076~mitotic chromosome condensation;GO:0018108~peptidyl-tyrosine phosphorylation;GO:0030049~muscle filament sliding;GO:0030240~skeletal muscle thin filament assembly;GO:0030241~skeletal muscle myosin thick filament assembly;GO:0035995~detection of mus…
>sp|Q8WZ42|TITIN_HUMAN Titin OS=Homo sapiens OX=9606 GN=TTN PE=1 SV=4T(27926)	Q8WZ42	TTN	T(27926)	TLLWRPPADDGGAKITHYIVEKRETSRVVWS	Peptide10284		-0.511901	0.00714015	-0.100759	0.0239831	0.0756009		0	-0.158539	-0.215809	-0.133975	0.0784221		-0.400418	-0.366094	0.139489	0.158539	0.276474		0.161962	-0.0255759	-0.0808722	-0.223731	0.103917			0.0518225	0.858506		0.123102	0.710187		0.143794	0.588709		0.321193	0.21627		0	0	0.506062	0		GO:0002576~platelet degranulation;GO:0003300~cardiac muscle hypertrophy;GO:0006936~muscle contraction;GO:0006941~striated muscle contraction;GO:0007076~mitotic chromosome condensation;GO:0018108~peptidyl-tyrosine phosphorylation;GO:0030049~muscle filament sliding;GO:0030240~skeletal muscle thin filament assembly;GO:0030241~skeletal muscle myosin thick filament assembly;GO:0035995~detection of mus…
>sp|Q8WZ42|TITIN_HUMAN Titin OS=Homo sapiens OX=9606 GN=TTN PE=1 SV=4T(10316)	Q8WZ42	TTN	T(10316)	EVQKGVVTEEKITIVTQREESPPPAVPEIPK	Peptide10285		0.114387	-0.0705488	0.0181006	-0.20488	-0.0265258		0	-0.0958282	0.180962	-0.0631655	-0.10597		0.152548	0.0846718	0.00322457	-0.313568	-0.0782278		-0.101468	-0.102158	0.0857878	-0.0228976	-0.0943314			-0.0873326	0.575078		0.0306519	0.906739		-0.192495	0.221115		-0.117631	0.496007		0	0	0	0		GO:0002576~platelet degranulation;GO:0003300~cardiac muscle hypertrophy;GO:0006936~muscle contraction;GO:0006941~striated muscle contraction;GO:0007076~mitotic chromosome condensation;GO:0018108~peptidyl-tyrosine phosphorylation;GO:0030049~muscle filament sliding;GO:0030240~skeletal muscle thin filament assembly;GO:0030241~skeletal muscle myosin thick filament assembly;GO:0035995~detection of mus…
>sp|Q8WZ42|TITIN_HUMAN Titin OS=Homo sapiens OX=9606 GN=TTN PE=1 SV=4T(27911)	Q8WZ42	TTN	T(27911)	PGGPIEFKTVTAEKITLLWRPPADDGGAKIT	Peptide10286		-0.447893	-0.200158	0.0603211	-0.032324	0.0679073		0	-0.392465	-0.00324777	0.028638	0.0509936		0.286438	-0.18375	-0.244463	0.0796245	-0.0580852		-0.187441	-0.124632	-0.136047	0.0937711	0.1258			-0.138027	0.524393		0.00636473	0.986556		0.129651	0.577022		0.133878	0.599226		0	0	0.320888	0		GO:0002576~platelet degranulation;GO:0003300~cardiac muscle hypertrophy;GO:0006936~muscle contraction;GO:0006941~striated muscle contraction;GO:0007076~mitotic chromosome condensation;GO:0018108~peptidyl-tyrosine phosphorylation;GO:0030049~muscle filament sliding;GO:0030240~skeletal muscle thin filament assembly;GO:0030241~skeletal muscle myosin thick filament assembly;GO:0035995~detection of mus…
>sp|P05976|MYL1_HUMAN Myosin light chain 1/3; skeletal muscle isoform OS=Homo sapiens OX=9606 GN=MYL1 PE=2 SV=3T(71)	P05976	MYL1	T(71)	KEAFLLFDRTGDSKITLSQVGDVLRALGTNP	Peptide10287		-0.00927123	-0.0240479	0.0954464	0.0531071	0.180421		0	-0.0278712	0.119347	0.0951119	0.13982		-0.00702041	-0.136512	0.10381	0.1419	0.166589		-0.0431532	-0.0572606	0.123604	-0.0122681	0.226299			-0.0465617	0.710481		0.125413	0.323737		0.084324	0.490013		0.193144	0.108095		0	0	0	0		GO:0006936~muscle contraction;GO:0030049~muscle filament sliding;GO:0060048~cardiac muscle contraction
>sp|Q8WZ42|TITIN_HUMAN Titin OS=Homo sapiens OX=9606 GN=TTN PE=1 SV=4T(15043)	Q8WZ42	TTN	T(15043)	DLKWTVPEKDGGSPITNYIVEKRDVRRKGWQ	Peptide10288		-0.341669	0.0932173	0.124292	0.208761	0.070392		0	0.0432902	-0.0136924	0.0256957	0.153494		-0.189393	0.0768939	0.149653	0.15262	0.192902		0.0784208	0.099864	0.00443026	0.131249	0.13041			0.191477	0.188167		0.179331	0.289506		0.242742	0.130669		0.24996	0.123612		0	0	0.667869	0		GO:0002576~platelet degranulation;GO:0003300~cardiac muscle hypertrophy;GO:0006936~muscle contraction;GO:0006941~striated muscle contraction;GO:0007076~mitotic chromosome condensation;GO:0018108~peptidyl-tyrosine phosphorylation;GO:0030049~muscle filament sliding;GO:0030240~skeletal muscle thin filament assembly;GO:0030241~skeletal muscle myosin thick filament assembly;GO:0035995~detection of mus…
>sp|Q8WZ42|TITIN_HUMAN Titin OS=Homo sapiens OX=9606 GN=TTN PE=1 SV=4T(21667)	Q8WZ42	TTN	T(21667)	GTALRITQFVVPDLQTKEKYNFRISAINDAG	Peptide10289		0.00139856	-0.235588	-0.0389548	-0.162437	-0.391825		0	-0.129947	0.140584	0.0221449	-0.550147		-0.273877	-0.271231	0.0660877	-0.133821	-0.293462		-0.105023	-0.695826	-0.0611362	-0.16711	-0.123659			-0.238773	0.222639		0.121021	0.660799		-0.0159303	0.951106		-0.245398	0.274559		0.368877	0	0	0		GO:0002576~platelet degranulation;GO:0003300~cardiac muscle hypertrophy;GO:0006936~muscle contraction;GO:0006941~striated muscle contraction;GO:0007076~mitotic chromosome condensation;GO:0018108~peptidyl-tyrosine phosphorylation;GO:0030049~muscle filament sliding;GO:0030240~skeletal muscle thin filament assembly;GO:0030241~skeletal muscle myosin thick filament assembly;GO:0035995~detection of mus…
>sp|O15234|CASC3_HUMAN Protein CASC3 OS=Homo sapiens OX=9606 GN=CASC3 PE=1 SV=2S(363)	O15234	CASC3	S(363)	SYRSRRLEQTSVRDPSPEADAPVLGSPEKEE	Peptide1029		-0.574635	-0.744524	-0.714284	-0.894652	-0.569296		0						-0.493712	-0.621759	-0.546815	-0.734942	-0.426052									-0.148968	0.582133		-0.0963764	0.803516		-0.280624	0.319978		0.0364996	0.924172		0	0.60926	0	0		GO:0000184~nuclear-transcribed mR catabolic process;GO:0000398~mR splicing;GO:0006369~termition of R polymerase II transcription;GO:0006397~mR processing;GO:0006405~R export from nucleus;GO:0006406~mR export from nucleus;GO:0006417~regulation of translation;GO:0008298~intracellular mR localization;GO:0016070~R metabolic process;GO:0031124~mR 3'-end processing;nonsense-mediated decay;via spliceoso…
>sp|Q8WZ42|TITIN_HUMAN Titin OS=Homo sapiens OX=9606 GN=TTN PE=1 SV=4T(20653)	Q8WZ42	TTN	T(20653)	MRLYVPVKGRPPPKITWSKPNVNLRDRIGLD	Peptide10290		-0.836727	-0.495774	-0.0203609	-0.0657849	-0.0864571		0	-0.626412	-0.313361	-0.319686	-0.0271214		-0.0888579	-0.116952	-0.151169	-0.288457	-0.0273636		0.00992836	-0.0916095	-0.15563	-0.242409	-0.123793			-0.103773	0.739177		0.0687839	0.882631		-0.000170296	0.999538		0.16273	0.626406		0	0.465204	0	0		GO:0002576~platelet degranulation;GO:0003300~cardiac muscle hypertrophy;GO:0006936~muscle contraction;GO:0006941~striated muscle contraction;GO:0007076~mitotic chromosome condensation;GO:0018108~peptidyl-tyrosine phosphorylation;GO:0030049~muscle filament sliding;GO:0030240~skeletal muscle thin filament assembly;GO:0030241~skeletal muscle myosin thick filament assembly;GO:0035995~detection of mus…
>sp|P08590|MYL3_HUMAN Myosin light chain 3 OS=Homo sapiens OX=9606 GN=MYL3 PE=1 SV=3Y(73)	P08590	MYL3	Y(73)	FMLFDRTPKCEMKITYGQCGDVLRALGQNPT	Peptide10291		-0.908273	-0.0682315	-0.111157	-0.369428	-0.613263		0	-0.371835	-0.975985	-0.508319	-0.0949182		-0.137733	-0.344773	-0.285433	-0.926842	-0.360459		-0.68187	-0.119674	-0.640094	-0.223954	-0.235376			0.20584	0.593042		-0.0711983	0.914262		-0.0751667	0.865139		0.105965	0.833795		0	0	0.528326	0		GO:0002026~regulation of the force of heart contraction;GO:0006942~regulation of striated muscle contraction;GO:0007519~skeletal muscle tissue development;GO:0030049~muscle filament sliding;GO:0032781~positive regulation of ATPase activity;GO:0055010~ventricular cardiac muscle tissue morphogenesis;GO:0060048~cardiac muscle contraction
>sp|Q9UKX2|MYH2_HUMAN Myosin-2 OS=Homo sapiens OX=9606 GN=MYH2 PE=1 SV=1S(1605)	Q9UKX2	MYH2	S(1605)	DQLKRNHIRIVESMQSTLDAEIRSRNDAIRL	Peptide10292		-0.02235	-0.0822085	-0.172313	-0.182661	0.0226132		0	-0.214258	0.131124	0.359413	-0.384921		0.0132842	-0.2693	-0.0965826	0.000152292	0.113368		-0.100134	-0.168098	-0.00535324	-0.260201	0.0471271			-0.156166	0.486159		-0.00848126	0.982472		0.00647577	0.981441		-0.0231533	0.947824		0	0	0	0		GO:0001778~plasma membrane repair;GO:0006936~muscle contraction;GO:0014823~response to activity;GO:0030049~muscle filament sliding;GO:0038096~Fc-gamma receptor sigling pathway involved in phagocytosis
>sp|Q9UKX2|MYH2_HUMAN Myosin-2 OS=Homo sapiens OX=9606 GN=MYH2 PE=1 SV=1S(1602)	Q9UKX2	MYH2	S(1602)	EEIDQLKRNHIRIVESMQSTLDAEIRSRNDA	Peptide10293		0.100539	0.0226763	0.224404	-0.246995	0.0787854		0	0.0836268	0.0241138	-0.201422	0.091903		0.0434672	0.122115	0.00472086	-0.0489949	0.196351		0.36966	0.206398	0.132028	-0.298727	-0.0416864			-0.0197128	0.924658		-0.0321	0.913303		-0.327451	0.0592549		-0.0470783	0.834288		0	0	0	0.574177		GO:0001778~plasma membrane repair;GO:0006936~muscle contraction;GO:0014823~response to activity;GO:0030049~muscle filament sliding;GO:0038096~Fc-gamma receptor sigling pathway involved in phagocytosis
>sp|Q9UKX2|MYH2_HUMAN Myosin-2 OS=Homo sapiens OX=9606 GN=MYH2 PE=1 SV=1S(1613)	Q9UKX2	MYH2	S(1613)	RIVESMQSTLDAEIRSRNDAIRLKKKMEGDL	Peptide10294		0.584278	-0.185692	0.214199	-0.0901216	0.171016		0	-0.0834031	0.399385	0.61689	-0.1113		0.0817665	0.0470678	0.273042	-0.0316732	-0.222522		-0.171061	-0.326506	0.0813096	0.122247	0.233617			-0.260879	0.365542		0.118238	0.783345		0.0305895	0.93303		-0.106043	0.790774		0.558963	0	0	0		GO:0001778~plasma membrane repair;GO:0006936~muscle contraction;GO:0014823~response to activity;GO:0030049~muscle filament sliding;GO:0038096~Fc-gamma receptor sigling pathway involved in phagocytosis
>sp|Q7Z410|TMPS9_HUMAN >tr|ansmembrane protease serine 9 OS=Homo sapiens OX=9606 GN=TMPRSS9 PE=1 SV=2S(831)	Q7Z410	TMPRSS9	S(831)	DCGLAPAALTRIVGGSAAGRGEWPWQVSLWL	Peptide10295		-0.439664	-0.642029	-0.672138	-0.911574	-0.726034		0						-0.603498	-0.816676	-0.188707	-0.603138	-0.734002									-0.207772	0.567798		0.0911582	0.871511		-0.235775	0.537069		-0.208437	0.620097		0	0.585776	0	0		GO:0006508~proteolysis
>sp|Q8WZ42|TITIN_HUMAN Titin OS=Homo sapiens OX=9606 GN=TTN PE=1 SV=4T(10148)	Q8WZ42	TTN	T(10148)	VPEVSKKIVPQKPSRTPVQEEVIEVKVPAVH	Peptide10296		0.827833	0.772873	0.0883516	-0.715024	0.353559		0	0.465345	0.438431	-0.0675278	0.186546		0.63539	-0.244176	0.0166806	-0.218228	0.624793		-0.0925122	0.453809	0.638897	-0.269663	0.0152921			0.0192852	0.969962		-0.0470876	0.948827		-0.660289	0.121554		-0.0476303	0.939892		0	0	0	0.573654		GO:0002576~platelet degranulation;GO:0003300~cardiac muscle hypertrophy;GO:0006936~muscle contraction;GO:0006941~striated muscle contraction;GO:0007076~mitotic chromosome condensation;GO:0018108~peptidyl-tyrosine phosphorylation;GO:0030049~muscle filament sliding;GO:0030240~skeletal muscle thin filament assembly;GO:0030241~skeletal muscle myosin thick filament assembly;GO:0035995~detection of mus…
>sp|Q8WZ42|TITIN_HUMAN Titin OS=Homo sapiens OX=9606 GN=TTN PE=1 SV=4T(22775)	Q8WZ42	TTN	T(22775)	AMNSEGLGEPALVPGTPKAEDRMLPPEIELD	Peptide10297		0.348352	-0.0482076	0.00482583	-0.278883	0.167291		0	-0.220314	-0.00784776	-0.214898	0.23172		0.228382	-0.132078	0.22902	-0.256671	-0.163927		0.0913503	0.321084	0.225698	-0.10051	-0.297201			-0.1869	0.416008		-0.054097	0.889457		-0.379761	0.113452		-0.18255	0.491615		0	0	0	0.713438		GO:0002576~platelet degranulation;GO:0003300~cardiac muscle hypertrophy;GO:0006936~muscle contraction;GO:0006941~striated muscle contraction;GO:0007076~mitotic chromosome condensation;GO:0018108~peptidyl-tyrosine phosphorylation;GO:0030049~muscle filament sliding;GO:0030240~skeletal muscle thin filament assembly;GO:0030241~skeletal muscle myosin thick filament assembly;GO:0035995~detection of mus…
>sp|Q8WZ42|TITIN_HUMAN Titin OS=Homo sapiens OX=9606 GN=TTN PE=1 SV=4T(16477)	Q8WZ42	TTN	T(16477)	DKRDASRKKAEWEEVTNTAVEKRYGIWKLIP	Peptide10298		-0.23144	-0.444281	0.108001	0.447939	0.359034		0	-0.25754	-0.0974193	0.421432	0.216809		-0.0283759	0.194605	0.0324555	0.302611	0.106183		-0.00276042	0.30415	0.148466	-0.117117	0.306523			0.0148775	0.963863		0.11352	0.763745		0.32936	0.231453		0.312781	0.272801		0	0	0.432878	0		GO:0002576~platelet degranulation;GO:0003300~cardiac muscle hypertrophy;GO:0006936~muscle contraction;GO:0006941~striated muscle contraction;GO:0007076~mitotic chromosome condensation;GO:0018108~peptidyl-tyrosine phosphorylation;GO:0030049~muscle filament sliding;GO:0030240~skeletal muscle thin filament assembly;GO:0030241~skeletal muscle myosin thick filament assembly;GO:0035995~detection of mus…
>tr||A0A286YFB1|A0A286YFB1_HUMAN >tr|oponin T; fast skeletal muscle OS=Homo sapiens OX=9606 GN=TNNT3 PE=1 SV=1T(179)	A0A286YFB1	TNNT3	T(179)	RSRIDQAQKHSKKAGTPAKGKVGGRWK____	Peptide10299		-0.462953	-0.533993	-0.497188	-0.470935	3.56131		0	-0.46659	1.36009	0.610793	1.7569		0.289569	1.47417	0.20616	0.246217	1.10921		-0.404785	0.0827678	0.747523	-0.733283	2.84184			0.283632	0.781476		0.598689	0.608205		0.05774	0.959841		2.46186	0.0135708		0	0.355986	0	0
>sp|O95685|PPR3D_HUMAN Protein phosphatase 1 regulatory subunit 3D OS=Homo sapiens OX=9606 GN=PPP1R3D PE=1 SV=1S(46)	O95685	PPP1R3D	S(46)	DGGVALEPRACRPPGSPGRAPPPTPAPSGCD	Peptide103		1.02379	0.754343	0.72696	-0.400378	0.771269		0	1.07007	0.240516	0.631221	0.626481		0.101784	0.779007	0.576784	0.152255	0.0400134		-0.169355	0.780854	0.541631	-0.401927	0.835487			0.607013	0.140645		0.282417	0.621173		-0.243763	0.61632		0.329257	0.51765		0	0	0	0.298547		GO:0005977~glycogen metabolic process;GO:0005979~regulation of glycogen biosynthetic process;GO:0005981~regulation of glycogen catabolic process;GO:0006470~protein dephosphorylation
>sp|Q99497|PARK7_HUMAN Protein/nucleic acid deglycase DJ-1 OS=Homo sapiens OX=9606 GN=PARK7 PE=1 SV=2S(47)	Q99497	PARK7	S(47)	KVTVAGLAGKDPVQCSRDVVICPDASLEDAK	Peptide1030		-0.111558	-0.16315	-0.0646693	0.0310071	0.00143055		0	-0.142457	0.0477652	-0.0292578	-0.0457581		0.0407232	0.0697282	-0.135917	-0.0896327	-0.0408265		-0.00585641	-0.0819459	-0.258829	0.00764106	0.104605			-0.0602835	0.7008		-0.0837399	0.663483		-0.000887892	0.99535		0.0240353	0.910307		0	0	0	0		GO:0001933~negative regulation of protein phosphorylation;GO:0006469~negative regulation of protein kise activity;GO:0006508~proteolysis;GO:0006517~protein deglycosylation;GO:0006914~autophagy;GO:0006954~inflammatory response;GO:0007005~mitochondrion organization;GO:0007265~Ras protein sigl transduction;GO:0007338~single fertilization;GO:0008344~adult locomotory behavior;GO:0009438~methylglyoxal …
>sp|P12814|ACTN1_HUMAN Alpha-actinin-1 OS=Homo sapiens OX=9606 GN=ACTN1 PE=1 SV=2T(50)	P12814	ACTN1	T(50)	KTFTAWCNSHLRKAGTQIENIEEDFRDGLKL	Peptide10300		0.530576	0.268896	-0.39737	-0.331441	0.0517155		0	0.0831399	0.119251	0.0578904	-0.212796		0.152217	-0.203292	0.00954561	0.0477446	-0.313748		-0.0245981	0.0582833	0.0155535	-0.0854703	-0.241573			-0.112792	0.679624		-0.227804	0.448336		-0.242368	0.360808		-0.343649	0.204879		0	0	0	0.634596		GO:0002576~platelet degranulation;GO:0007015~actin filament organization;GO:0030168~platelet activation;GO:0030220~platelet formation;GO:0036344~platelet morphogenesis;GO:0042981~regulation of apoptotic process;GO:0048041~focal adhesion assembly;GO:0051017~actin filament bundle assembly;GO:0051271~negative regulation of cellular component movement;GO:0051639~actin filament network formation;GO:00…
>sp|Q02880|TOP2B_HUMAN D topoisomerase 2-beta OS=Homo sapiens OX=9606 GN=TOP2B PE=1 SV=3S(1550)	Q02880	TOP2B	S(1550)	TTPKGKGRGAKKRKASGSENEGDYNPGRKTS	Peptide10301		-1.05053	0.882404	0.905164	-0.0670399	-0.0328885		0	0.555342	0.307815	0.417258	-0.0719276		-0.52178	0.525332	0.933423	0.204246	-0.28658		-0.361226	0.598771	0.175964	-0.114324	0.46734			1.12385	0.00298574		1.06398	0.00926093		0.59342	0.133713		0.502371	0.219639		0	0.452669	0	0		GO:0000712~resolution of meiotic recombition intermediates;GO:0000819~sister chromatid segregation;GO:0001764~neuron migration;GO:0006265~D topological change;GO:0006268~D unwinding involved in D replication;GO:0006312~mitotic recombition;GO:0007409~axonogenesis;GO:0016925~protein sumoylation;GO:0030900~forebrain development;GO:0044774~mitotic D integrity checkpoint
>sp|Q05D32|CTSL2_HUMAN CTD small phosphatase-like protein 2 OS=Homo sapiens OX=9606 GN=CTDSPL2 PE=1 SV=2S(9)	Q05D32	CTDSPL2	S(9)	_______MRLRTRKASQQSNQIQTQRTARAK	Peptide10302		-2.32932	1.19629	1.30612	-0.893713	0.0411375		0	0.277083	0.881084	-0.224165	-0.340314		-1.22497	-0.18779	1.82998	-0.278778	0.35139		-0.382554	0.437121	0.729334	-1.22318	0.732517			1.41489	0.038202		2.17084	0.00664126		0.329254	0.68985		1.1804	0.123612		0	0.691236	0	0		GO:0006470~protein dephosphorylation;GO:0030514~negative regulation of BMP sigling pathway;GO:0046827~positive regulation of protein export from nucleus
>sp|Q5VTT2|CI135_HUMAN Protein C9orf135 OS=Homo sapiens OX=9606 GN=C9orf135 PE=1 SV=1T(189)	Q5VTT2	C9orf135	T(189)	QDDYSIVHRKCRSQFTDLNGSKRFGINTWHD	Peptide10303		-0.662631	-0.887352	-0.606808	-0.854993	-0.739696		0						-0.622684	-0.866263	-0.447398	-0.802557	-0.447145									-0.23415	0.385588		0.115555	0.761649		-0.186117	0.522164		0.049237	0.897494		0	0.70091	0	0
>sp|Q8WZ42|TITIN_HUMAN Titin OS=Homo sapiens OX=9606 GN=TTN PE=1 SV=4S(25058)	Q8WZ42	TTN	S(25058)	PGPPQNLAVKEVRKDSAFLVWEPPIIDGGAK	Peptide10304		-0.156919	-0.407215	0.0908515	0.158568	0.176329		0	-0.356528	0.11193	-0.138118	0.226199		0.0740309	0.14879	0.0492176	-0.399548	0.266371		0.0240745	0.136926	-0.0648002	-0.0322272	0.154863			-0.104803	0.669003		0.0615031	0.86816		-0.0881279	0.739631		0.220644	0.389774		0.285524	0	0	0		GO:0002576~platelet degranulation;GO:0003300~cardiac muscle hypertrophy;GO:0006936~muscle contraction;GO:0006941~striated muscle contraction;GO:0007076~mitotic chromosome condensation;GO:0018108~peptidyl-tyrosine phosphorylation;GO:0030049~muscle filament sliding;GO:0030240~skeletal muscle thin filament assembly;GO:0030241~skeletal muscle myosin thick filament assembly;GO:0035995~detection of mus…
>sp|Q8WZ42|TITIN_HUMAN Titin OS=Homo sapiens OX=9606 GN=TTN PE=1 SV=4S(20290)	Q8WZ42	TTN	S(20290)	RNLCTLELFSVNRKDSGDYTITAENSSGSKS	Peptide10305		0.280786	0.102183	0.637109	0.243931	0.241136		0	-0.00767574	0.338711	0.56995	0.331018		0.139763	0.164431	0.565484	0.16136	0.0842353		0.0917846	0.415067	0.214353	0.430795	0.146778			0.0404176	0.872672		0.310831	0.159743		0.223425	0.302551		0.0727083	0.797844		0.359846	0	0	0		GO:0002576~platelet degranulation;GO:0003300~cardiac muscle hypertrophy;GO:0006936~muscle contraction;GO:0006941~striated muscle contraction;GO:0007076~mitotic chromosome condensation;GO:0018108~peptidyl-tyrosine phosphorylation;GO:0030049~muscle filament sliding;GO:0030240~skeletal muscle thin filament assembly;GO:0030241~skeletal muscle myosin thick filament assembly;GO:0035995~detection of mus…
>sp|Q8WZ42|TITIN_HUMAN Titin OS=Homo sapiens OX=9606 GN=TTN PE=1 SV=4Y(19895)	Q8WZ42	TTN	Y(19895)	SSILIIKDVTRKDSGYYSLTAENSSGTDTQK	Peptide10306		0.0788729	-0.0680565	-0.045679	0.172522	-0.158293		0	-0.168243	0.0752163	0.105855	-0.0955517		-0.00311921	-0.262335	0.103972	-0.0247036	-0.0723928		-0.0692962	-0.0982175	-0.159444	0.237816	-0.0974036			-0.150827	0.275383		-0.00809812	0.97553		0.121258	0.423269		-0.107525	0.519203		0.48849	0	0	0		GO:0002576~platelet degranulation;GO:0003300~cardiac muscle hypertrophy;GO:0006936~muscle contraction;GO:0006941~striated muscle contraction;GO:0007076~mitotic chromosome condensation;GO:0018108~peptidyl-tyrosine phosphorylation;GO:0030049~muscle filament sliding;GO:0030240~skeletal muscle thin filament assembly;GO:0030241~skeletal muscle myosin thick filament assembly;GO:0035995~detection of mus…
>sp|Q8WZ42|TITIN_HUMAN Titin OS=Homo sapiens OX=9606 GN=TTN PE=1 SV=4T(19906)	Q8WZ42	TTN	T(19906)	KDSGYYSLTAENSSGTDTQKIKVVVMDAPGP	Peptide10307		-0.415733	-0.126983	-0.0766642	0.237955	-0.00323812		0	-0.232395	-0.0870444	0.00147781	0.0276415		-0.141032	0.0595578	0.128572	0.0193515	-0.199013		-0.0529544	0.141201	-0.157425	0.114276	-0.0347404			0.112775	0.565287		0.10429	0.683277		0.245695	0.217499		0.100093	0.668158		0	0	0.569106	0		GO:0002576~platelet degranulation;GO:0003300~cardiac muscle hypertrophy;GO:0006936~muscle contraction;GO:0006941~striated muscle contraction;GO:0007076~mitotic chromosome condensation;GO:0018108~peptidyl-tyrosine phosphorylation;GO:0030049~muscle filament sliding;GO:0030240~skeletal muscle thin filament assembly;GO:0030241~skeletal muscle myosin thick filament assembly;GO:0035995~detection of mus…
>sp|Q8WZ42|TITIN_HUMAN Titin OS=Homo sapiens OX=9606 GN=TTN PE=1 SV=4T(19908)	Q8WZ42	TTN	T(19908)	SGYYSLTAENSSGTDTQKIKVVVMDAPGPPQ	Peptide10308		0.445897	0.470349	-0.115416	-0.133366	0.0889056		0	0.337079	0.131661	-0.0214997	0.0625816		0.146109	0.131294	0.0539172	0.0996298	0.126977		0.231742	0.267653	0.230081	0.212407	-0.274293			0.0956566	0.671533		-0.130876	0.633551		-0.166644	0.452911		-0.204894	0.384757		0	0	0	0.568337		GO:0002576~platelet degranulation;GO:0003300~cardiac muscle hypertrophy;GO:0006936~muscle contraction;GO:0006941~striated muscle contraction;GO:0007076~mitotic chromosome condensation;GO:0018108~peptidyl-tyrosine phosphorylation;GO:0030049~muscle filament sliding;GO:0030240~skeletal muscle thin filament assembly;GO:0030241~skeletal muscle myosin thick filament assembly;GO:0035995~detection of mus…
>sp|Q8WZ42|TITIN_HUMAN Titin OS=Homo sapiens OX=9606 GN=TTN PE=1 SV=4S(26145)	Q8WZ42	TTN	S(26145)	VNLTIREVKKDSVTLSWEPPLIDGGAKITNY	Peptide10309		0.0584322	-0.423487	-0.00697537	-0.121422	-0.0615266		0	-0.373	-0.0728033	-0.233256	-0.0358731		0.0895254	-0.194425	0.00821387	-0.0122198	-0.430149		0.111691	-0.115051	0.0560584	-0.185599	-0.260072			-0.341403	0.0302555		-0.0687889	0.780717		-0.203036	0.249359		-0.261818	0.139976		0	0	0	0.52195		GO:0002576~platelet degranulation;GO:0003300~cardiac muscle hypertrophy;GO:0006936~muscle contraction;GO:0006941~striated muscle contraction;GO:0007076~mitotic chromosome condensation;GO:0018108~peptidyl-tyrosine phosphorylation;GO:0030049~muscle filament sliding;GO:0030240~skeletal muscle thin filament assembly;GO:0030241~skeletal muscle myosin thick filament assembly;GO:0035995~detection of mus…
>sp|Q15149|PLEC_HUMAN Plectin OS=Homo sapiens OX=9606 GN=PLEC PE=1 SV=3S(3580)	Q15149	PLEC	S(3580)	SAEKAVTGYRDPYSGSTISLFQAMQKGLVLR	Peptide1031		-0.393762	-0.519426	-0.756801	-0.709472	-0.806631		0						-0.520381	-0.815242	-0.280677	-0.689529	-0.464761									-0.210263	0.581737		-0.0616678	0.925228		-0.242429	0.545028		-0.178625	0.694822		0	0.719138	0	0		GO:0031581~hemidesmosome assembly;GO:0098609~cell-cell adhesion
>sp|P20929|NEBU_HUMAN Nebulin OS=Homo sapiens OX=9606 GN=NEB PE=1 SV=5S(5944)	P20929	NEB	S(5944)	QQMQSGKEYRKDYEESIKGRNLTGLEVTPAL	Peptide10310		-0.407427	0.0170915	0.316041	-0.107363	-0.243915		0	-0.0277516	0.0203568	-0.0518529	-0.185439		-0.0461691	-0.0803094	0.0311513	-0.0114728	-0.145609		-0.0952092	-0.0370028	-0.104459	-0.193156	0.0694691			0.105208	0.58258		0.202974	0.320826		0.0462403	0.833515		0.0108278	0.970601		0	0.503411	0	0		GO:0007517~muscle organ development;GO:0007525~somatic muscle development;GO:0030049~muscle filament sliding;GO:0030832~regulation of actin filament length
>sp|Q9UKX2|MYH2_HUMAN Myosin-2 OS=Homo sapiens OX=9606 GN=MYH2 PE=1 SV=1T(211)	Q9UKX2	MYH2	T(211)	FATIAVTGEKKKEEITSGKIQGTLEDQIISA	Peptide10311		-0.444554	-0.491015	0.16647	-0.0537518	0.427273		0	-0.523615	0.072783	0.179681	0.197673		0.106718	-0.138374	-0.229005	0.0492906	0.419353		0.102587	-0.0999615	-0.317082	-0.314979	0.629358			-0.254429	0.335571		-0.0178964	0.971751		0.0238723	0.943892		0.477226	0.093623		0.319785	0	0	0		GO:0001778~plasma membrane repair;GO:0006936~muscle contraction;GO:0014823~response to activity;GO:0030049~muscle filament sliding;GO:0038096~Fc-gamma receptor sigling pathway involved in phagocytosis
>sp|Q8WZ42|TITIN_HUMAN Titin OS=Homo sapiens OX=9606 GN=TTN PE=1 SV=4T(19492)	Q8WZ42	TTN	T(19492)	RCAAQLVRKEFTVTSLDENQEYEFRVCAQ	Peptide10312		0.000659128	-0.184125	-0.0273471	0.105967	0.218031		0	-0.219786	-0.0617065	0.244451	0.117576		-0.136278	-0.0316737	0.20469	0.104129	-0.0239828		0.0809649	0.0564668	0.0440938	0.0193287	0.0415764			-0.0811159	0.628394		0.0535961	0.828651		0.132133	0.430557		0.101964	0.59307		0	0	0	0		GO:0002576~platelet degranulation;GO:0003300~cardiac muscle hypertrophy;GO:0006936~muscle contraction;GO:0006941~striated muscle contraction;GO:0007076~mitotic chromosome condensation;GO:0018108~peptidyl-tyrosine phosphorylation;GO:0030049~muscle filament sliding;GO:0030240~skeletal muscle thin filament assembly;GO:0030241~skeletal muscle myosin thick filament assembly;GO:0035995~detection of mus…
>sp|Q8WZ42|TITIN_HUMAN Titin OS=Homo sapiens OX=9606 GN=TTN PE=1 SV=4S(19493)	Q8WZ42	TTN	S(19493)	CAAQLVRKEFTVTSLDENQEYEFRVCAQN	Peptide10313		-1.05053	-0.83748	-0.619887	-0.636394	-0.553864		0						-0.493097	-0.748965	-0.396754	-0.774608	-0.353889									-0.0214105	0.961765		0.263491	0.572113		0.0663106	0.87739		0.317936	0.44922		0	0.530449	0	0		GO:0002576~platelet degranulation;GO:0003300~cardiac muscle hypertrophy;GO:0006936~muscle contraction;GO:0006941~striated muscle contraction;GO:0007076~mitotic chromosome condensation;GO:0018108~peptidyl-tyrosine phosphorylation;GO:0030049~muscle filament sliding;GO:0030240~skeletal muscle thin filament assembly;GO:0030241~skeletal muscle myosin thick filament assembly;GO:0035995~detection of mus…
>sp|Q8WZ42|TITIN_HUMAN Titin OS=Homo sapiens OX=9606 GN=TTN PE=1 SV=4T(19490)	Q8WZ42	TTN	T(19490)	WKRCAAQLVRKEFTVTSLDENQEYEFRVC	Peptide10314		-0.975684	-0.989494	-0.38627	-0.600489	-0.884706		0						-0.614704	-0.711302	-0.531517	-0.906878	-0.411813									-0.0552039	0.908087		0.336301	0.486236		0.0415106	0.931343		0.146934	0.779122		0	0.591824	0	0		GO:0002576~platelet degranulation;GO:0003300~cardiac muscle hypertrophy;GO:0006936~muscle contraction;GO:0006941~striated muscle contraction;GO:0007076~mitotic chromosome condensation;GO:0018108~peptidyl-tyrosine phosphorylation;GO:0030049~muscle filament sliding;GO:0030240~skeletal muscle thin filament assembly;GO:0030241~skeletal muscle myosin thick filament assembly;GO:0035995~detection of mus…
>tr||G5EA03|G5EA03_HUMAN LIM and calponin homology domains-containing protein 1 OS=Homo sapiens OX=9606 GN=LIMCH1 PE=1 SV=1S(263)	G5EA03	LIMCH1	S(263)	EEKEAIRDIVLRKENSFLTHQHGNDSEAEGE	Peptide10315		-0.823684	-0.63165	-0.501504	-0.641974	-0.906656		0						-0.394118	-0.732553	-0.644698	-0.677984	-0.337256									-0.0732004	0.875401		0.0358	0.958561		-0.0510781	0.913524		-0.013055	0.982984		0	0	0.518178	0		GO:0031032~actomyosin structure organization
>sp|O75152|ZC11A_HUMAN Zinc finger CCCH domain-containing protein 11A OS=Homo sapiens OX=9606 GN=ZC3H11A PE=1 SV=3S(290)	O75152	ZC3H11A	S(290)	LVRLSLTERLGKRKFSAGGDSDPPLKRSLAQ	Peptide10316		-0.185528	-0.293217	0.0785109	-0.492503	-0.350146		0	-0.0630469	-0.341495	-0.0969203	-0.507848		-0.478462	-0.175316	-0.0523396	-0.0851724	-0.299253		0.165716	-0.555846	-0.0214206	-0.741201	-0.13812			-0.147288	0.621259		0.0403826	0.939618		-0.22938	0.443456		-0.199273	0.548964		0	0	0	0.352152		GO:0006369~termition of R polymerase II transcription;GO:0006405~R export from nucleus;GO:0006406~mR export from nucleus;GO:0016973~poly(A)+ mR export from nucleus;GO:0031124~mR 3'-end processing
>sp|P49916|DNLI3_HUMAN D ligase 3 OS=Homo sapiens OX=9606 GN=LIG3 PE=1 SV=2S(242)	P49916	LIG3	S(242)	SGFSAKPNNSGEAPSSPTPKRSLSSSKCDPR	Peptide10317		-0.259211	-0.377785	-0.376881	-0.913478	-0.735254		0						-0.322802	-1.0432	-0.231694	-0.450074	-0.834613									-0.419485	0.326017		-0.0132807	0.986047		-0.39077	0.392		-0.493927	0.30769		0	0	0	0.351386		D gap filling;D ligation;GO:0000724~double-strand break repair via homologous recombition;GO:0006260~D replication;GO:0006266~D ligation;GO:0006273~lagging strand elongation;GO:0006281~D repair;GO:0006283~transcription-coupled nucleotide-excision repair;GO:0006288~base-excision repair;GO:0006297~nucleotide-excision repair;GO:0006302~double-strand break repair;GO:0006310~D recombition;GO:0007005~m…
>sp|Q8WZ42|TITIN_HUMAN Titin OS=Homo sapiens OX=9606 GN=TTN PE=1 SV=4T(5251)	Q8WZ42	TTN	T(5251)	QLLKKGDATQLACKVTGTPPIKITWFANDRE	Peptide10318		0.260599	-0.106267	0.00704965	-0.195231	-0.217851		0	0.0442219	0.0644895	0.00599138	-0.270247		-0.098824	-0.222578	-0.0700319	-0.117003	-0.140865		-0.06574	-0.458739	-0.257552	-0.192731	0.124046			-0.209849	0.297617		-0.0880199	0.770418		-0.148752	0.506495		-0.150238	0.538189		0	0	0	0		GO:0002576~platelet degranulation;GO:0003300~cardiac muscle hypertrophy;GO:0006936~muscle contraction;GO:0006941~striated muscle contraction;GO:0007076~mitotic chromosome condensation;GO:0018108~peptidyl-tyrosine phosphorylation;GO:0030049~muscle filament sliding;GO:0030240~skeletal muscle thin filament assembly;GO:0030241~skeletal muscle myosin thick filament assembly;GO:0035995~detection of mus…
>sp|Q8WZ42|TITIN_HUMAN Titin OS=Homo sapiens OX=9606 GN=TTN PE=1 SV=4S(19870)	Q8WZ42	TTN	S(19870)	PTCKWKKGEDEVVTSSHLAVHKADSSSILII	Peptide10319		0.404459	0.119091	0.041246	-0.582259	-0.289319		0	0.0663212	-0.153086	-0.431553	-0.06562		-0.222189	-0.279659	0.312114	-0.516584	-0.461349		0.00697337	-0.276559	-0.223681	-0.232197	-0.239253			-0.140012	0.602892		-0.0531628	0.906032		-0.487959	0.0706545		-0.311196	0.264329		0	0	0	0.631022		GO:0002576~platelet degranulation;GO:0003300~cardiac muscle hypertrophy;GO:0006936~muscle contraction;GO:0006941~striated muscle contraction;GO:0007076~mitotic chromosome condensation;GO:0018108~peptidyl-tyrosine phosphorylation;GO:0030049~muscle filament sliding;GO:0030240~skeletal muscle thin filament assembly;GO:0030241~skeletal muscle myosin thick filament assembly;GO:0035995~detection of mus…
>sp|P23327|SRCH_HUMAN Sarcoplasmic reticulum histidine-rich calcium-binding protein OS=Homo sapiens OX=9606 GN=HRC PE=1 SV=1S(529)	P23327	HRC	S(529)	RDQEDEEDEEEGHGLSLNQEEEEEEDKEEEE	Peptide1032		0.0676982	-0.452714	-0.272194	-0.434756	-0.0644058		0	-0.228575	-0.692324	-0.540988	-0.0481739		-0.132443	-0.0847075	-0.314691	-0.630918	0.292337		0.309013	0.254237	0.156642	-0.998455	-0.384738			-0.189007	0.575661		-0.341709	0.350735		-0.712346	0.0404389		-0.112312	0.800481		0	0	0	0.500203		GO:0002027~regulation of heart rate;GO:0006936~muscle contraction;GO:0010460~positive regulation of heart rate;GO:0010880~regulation of release of sequestered calcium ion into cytosol by sarcoplasmic reticulum;GO:0010881~regulation of cardiac muscle contraction by regulation of the release of sequestered calcium ion;GO:0033135~regulation of peptidyl-serine phosphorylation;GO:0045823~positive regu…
>sp|Q8WZ42|TITIN_HUMAN Titin OS=Homo sapiens OX=9606 GN=TTN PE=1 SV=4S(19869)	Q8WZ42	TTN	S(19869)	HPTCKWKKGEDEVVTSSHLAVHKADSSSILI	Peptide10320		-0.131949	-0.323652	0.17002	0.243081	-0.16711		0	-0.0384953	-0.00484776	-0.302139	0.066362		-0.202129	0.0398614	0.0313245	-0.215612	0.242998		0.0886639	-0.209893	0.0131857	-0.0528832	0.0692112			-0.071691	0.766104		0.113774	0.690844		-0.0205345	0.937482		0.114219	0.658839		0	0	0	0		GO:0002576~platelet degranulation;GO:0003300~cardiac muscle hypertrophy;GO:0006936~muscle contraction;GO:0006941~striated muscle contraction;GO:0007076~mitotic chromosome condensation;GO:0018108~peptidyl-tyrosine phosphorylation;GO:0030049~muscle filament sliding;GO:0030240~skeletal muscle thin filament assembly;GO:0030241~skeletal muscle myosin thick filament assembly;GO:0035995~detection of mus…
>sp|Q8WZ42|TITIN_HUMAN Titin OS=Homo sapiens OX=9606 GN=TTN PE=1 SV=4T(20952)	Q8WZ42	TTN	T(20952)	PAPSVSWKKGEDPLATDTRVSVESSAVNTTL	Peptide10321		-0.119313	-0.117939	0.0686884	0.0332609	-0.258673		0	-0.0219094	-0.0805226	-0.101675	-0.182679		-0.130352	-0.141731	-0.0946339	0.0189846	0.0389484		0.122849	-0.173839	-0.129741	-0.121456	-0.0582499			-0.0821506	0.608043		-0.0273483	0.921295		-0.0110174	0.954084		-0.0834594	0.652167		0	0	0	0		GO:0002576~platelet degranulation;GO:0003300~cardiac muscle hypertrophy;GO:0006936~muscle contraction;GO:0006941~striated muscle contraction;GO:0007076~mitotic chromosome condensation;GO:0018108~peptidyl-tyrosine phosphorylation;GO:0030049~muscle filament sliding;GO:0030240~skeletal muscle thin filament assembly;GO:0030241~skeletal muscle myosin thick filament assembly;GO:0035995~detection of mus…
>sp|Q8WZ42|TITIN_HUMAN Titin OS=Homo sapiens OX=9606 GN=TTN PE=1 SV=4S(33529)	Q8WZ42	TTN	S(33529)	EPVPTVTWLRKGQVLSTSARHQVTTTKYKST	Peptide10322		0.00977351	-0.186088	0.302285	-0.0627916	-0.0918075		0	-0.153597	0.00305514	-0.187056	0.0900895		0.0729868	-0.40854	0.00244548	0.0794474	0.0885952		0.157081	-0.0701651	-0.0749749	-0.203192	0.0895092			-0.264558	0.106455		-0.00175753	0.994567		-0.153358	0.402505		-0.0158636	0.953014		0.501159	0	0	0		GO:0002576~platelet degranulation;GO:0003300~cardiac muscle hypertrophy;GO:0006936~muscle contraction;GO:0006941~striated muscle contraction;GO:0007076~mitotic chromosome condensation;GO:0018108~peptidyl-tyrosine phosphorylation;GO:0030049~muscle filament sliding;GO:0030240~skeletal muscle thin filament assembly;GO:0030241~skeletal muscle myosin thick filament assembly;GO:0035995~detection of mus…
>tr||A0A0U1RQK4|A0A0U1RQK4_HUMAN [Protein ADP-ribosylarginine] hydrolase-like protein 1 OS=Homo sapiens OX=9606 GN=ADPRHL1 PE=1 SV=1S(1002)	A0A0U1RQK4	ADPRHL1	S(1002)	HPLPESNEISMQKKGSATNDPAASQNLLRGN	Peptide10323		-0.518035	-0.899424	0.558855	-1.38286	-0.464705		0						-0.717833	-0.853471	0.412672	-0.844932	-0.748755									-0.258513	0.486005		1.1037	0.0202363		-0.495962	0.220711		0.0112042	0.984092		0	0.451114	0	0
>sp|Q8WZ42|TITIN_HUMAN Titin OS=Homo sapiens OX=9606 GN=TTN PE=1 SV=4S(21935)	Q8WZ42	TTN	S(21935)	GSKITGYVIEAQRKGSDQWTHITTVKGLECV	Peptide10324		-0.113341	-0.582703	-0.801606	-0.55299	-1.09278		0						-0.946993	-0.616312	-0.162294	-1.22392	-0.71418									-0.0693402	0.92776		0.0482175	0.965764		-0.358285	0.594318		-0.373314	0.610745		0	0.446976	0	0		GO:0002576~platelet degranulation;GO:0003300~cardiac muscle hypertrophy;GO:0006936~muscle contraction;GO:0006941~striated muscle contraction;GO:0007076~mitotic chromosome condensation;GO:0018108~peptidyl-tyrosine phosphorylation;GO:0030049~muscle filament sliding;GO:0030240~skeletal muscle thin filament assembly;GO:0030241~skeletal muscle myosin thick filament assembly;GO:0035995~detection of mus…
>tr||A6NGQ3|A6NGQ3_HUMAN Obscurin OS=Homo sapiens OX=9606 GN=OBSCN PE=1 SV=5S(3738)	A6NGQ3	OBSCN	S(3738)	RCELSKAAPVEWRKGSETLRDGDRYCLRQDG	Peptide10325		-0.910034	-0.23428	1.52401	0.418313	0.264217		0	0.00366306	1.29948	0.538759	-0.0285796		-0.0118718	0.0734717	0.756651	0.857747	0.774925		-0.139075	-0.527216	1.88507	0.0270656	0.555451			0.0941547	0.857967		1.63155	0.00209511		0.725716	0.112314		0.656749	0.154636		0	0.444589	0	0		GO:0006468~protein phosphorylation;GO:0007275~multicellular organism development;GO:0035023~regulation of Rho protein sigl transduction;GO:0036309~protein localization to M-band;GO:0043065~positive regulation of apoptotic process;GO:0043547~positive regulation of GTPase activity;GO:0045214~sarcomere organization;GO:0051056~regulation of small GTPase mediated sigl transduction
>sp|P13533|MYH6_HUMAN Myosin-6 OS=Homo sapiens OX=9606 GN=MYH6 PE=1 SV=5S(645)	P13533	MYH6	S(645)	TGDSGKSKGGKKKGSSFQTVSALHRENLNKL	Peptide10326		0.888585	0.442177	-0.419267	-0.510753	-0.164918		0	0.366247	-0.523543	-0.3256	0.0245312		0.120977	-0.475698	-0.226325	-0.125888	-0.219806		0.139856	0.33548	-0.404186	-0.395646	-0.286687			-0.120303	0.751126		-0.680685	0.0497611		-0.626826	0.075357		-0.449074	0.214319		0	0	0	0.550203		GO:0001701~in utero embryonic development;GO:0002026~regulation of the force of heart contraction;GO:0002027~regulation of heart rate;GO:0006470~protein dephosphorylation;GO:0006936~muscle contraction;GO:0006941~striated muscle contraction;GO:0007512~adult heart development;GO:0007522~visceral muscle development;GO:0008016~regulation of heart contraction;GO:0008217~regulation of blood pressure;GO…
>tr||A6NGQ3|A6NGQ3_HUMAN Obscurin OS=Homo sapiens OX=9606 GN=OBSCN PE=1 SV=5S(6344)	A6NGQ3	OBSCN	S(6344)	RMLERFTPKKVKKGSSITFSVKVEGRPVPTV	Peptide10327		-1.2005	-0.897511	-0.150447	-1.01339	-0.688882		0						-0.709324	-0.352313	-0.113713	-0.60376	-1.12925									0.33	0.492573		0.822832	0.130376		0.146336	0.788949		0.0458438	0.950502		0	0.542879	0	0		GO:0006468~protein phosphorylation;GO:0007275~multicellular organism development;GO:0035023~regulation of Rho protein sigl transduction;GO:0036309~protein localization to M-band;GO:0043065~positive regulation of apoptotic process;GO:0043547~positive regulation of GTPase activity;GO:0045214~sarcomere organization;GO:0051056~regulation of small GTPase mediated sigl transduction
>sp|Q8WZ42|TITIN_HUMAN Titin OS=Homo sapiens OX=9606 GN=TTN PE=1 SV=4T(15059)	Q8WZ42	TTN	T(15059)	NYIVEKRDVRRKGWQTVDTTVKDTKCTVTPL	Peptide10328		0.364988	0.150785	0.070048	0.000333107	0.0971594		0	0.0989348	0.297818	0.255239	-0.0318391		0.116178	-0.0415281	0.137722	0.159031	0.11422		0.0818517	0.0141963	0.20682	0.164996	-0.0241503			-0.0851573	0.612799		0.0373477	0.890092		0.00414521	0.98352		-0.101907	0.594358		0	0	0	0		GO:0002576~platelet degranulation;GO:0003300~cardiac muscle hypertrophy;GO:0006936~muscle contraction;GO:0006941~striated muscle contraction;GO:0007076~mitotic chromosome condensation;GO:0018108~peptidyl-tyrosine phosphorylation;GO:0030049~muscle filament sliding;GO:0030240~skeletal muscle thin filament assembly;GO:0030241~skeletal muscle myosin thick filament assembly;GO:0035995~detection of mus…
>sp|Q8WZ42|TITIN_HUMAN Titin OS=Homo sapiens OX=9606 GN=TTN PE=1 SV=4S(5421)	Q8WZ42	TTN	S(5421)	RVTLREPPSFIKKIESTSSLRGGTAAFQATL	Peptide10329		0.00527403	0.27526	-0.0332534	-0.118149	0.0440068		0	0.108061	0.0814503	0.125089	-0.0594398		-0.130705	0.0301252	0.179124	9.56298e-05	0.0416862		0.050826	0.0499028	-0.0195245	0.063236	-0.0182443			0.134489	0.346223		0.0706003	0.726727		0.0362192	0.835312		0.0206534	0.924501		0	0	0	0		GO:0002576~platelet degranulation;GO:0003300~cardiac muscle hypertrophy;GO:0006936~muscle contraction;GO:0006941~striated muscle contraction;GO:0007076~mitotic chromosome condensation;GO:0018108~peptidyl-tyrosine phosphorylation;GO:0030049~muscle filament sliding;GO:0030240~skeletal muscle thin filament assembly;GO:0030241~skeletal muscle myosin thick filament assembly;GO:0035995~detection of mus…
>sp|Q9H7S9|ZN703_HUMAN Zinc finger protein 703 OS=Homo sapiens OX=9606 GN=ZNF703 PE=1 SV=1S(252)	Q9H7S9	ZNF703	S(252)	VGGGELDKKDQEPKPSPEPAAVSRGGGGEPG	Peptide1033		-0.134864	-0.168253	-0.0545655	0.0974633	0.149146		0	-0.0613276	0.00571777	0.00473789	0.110779		-0.0356713	0.157217	-0.105035	-0.0397282	0.0864463		-0.0678945	-0.148675	-0.105521	0.0342981	0.247883			0.00434773	0.981318		-0.00524354	0.982985		0.0838001	0.588988		0.208171	0.162088		0	0	0.417192	0		D-templated;GO:0006351~transcription;GO:0006355~regulation of transcription;GO:0008284~positive regulation of cell proliferation;GO:0010718~positive regulation of epithelial to mesenchymal transition;GO:0017015~regulation of transforming growth factor beta receptor sigling pathway;GO:0030335~positive regulation of cell migration;GO:0033601~positive regulation of mammary gland epithelial cell prol…
>sp|Q8WZ42|TITIN_HUMAN Titin OS=Homo sapiens OX=9606 GN=TTN PE=1 SV=4S(34298)	Q8WZ42	TTN	S(34298)	PTPEVTWSCGGRKIHSQEQGRFHIENTDDLT	Peptide10330		-1.46444	-1.04679	-0.273819	-0.355448	0.327628		0	-1.29992	-0.201181	0.0200937	-0.283709		0.0372866	-0.327249	-0.783194	-0.293658	0.661982		0.0518615	-0.612218	-0.339	-0.699713	0.373436			-0.477723	0.354203		-0.0554764	0.953009		0.0116409	0.986048		0.613657	0.282713		0	0	0.316224	0		GO:0002576~platelet degranulation;GO:0003300~cardiac muscle hypertrophy;GO:0006936~muscle contraction;GO:0006941~striated muscle contraction;GO:0007076~mitotic chromosome condensation;GO:0018108~peptidyl-tyrosine phosphorylation;GO:0030049~muscle filament sliding;GO:0030240~skeletal muscle thin filament assembly;GO:0030241~skeletal muscle myosin thick filament assembly;GO:0035995~detection of mus…
>sp|Q9NP98|MYOZ1_HUMAN Myozenin-1 OS=Homo sapiens OX=9606 GN=MYOZ1 PE=1 SV=1S(39)	Q9NP98	MYOZ1	S(39)	GGGQESSGLNLGKKISVPRDVMLEELSLLTN	Peptide10331		1.28191	-0.301103	0.177358	-0.974572	-0.787352		0	0.178029	0.593567	-0.458439	-0.968594		-0.568024	-0.590279	0.654318	-0.939491	-0.643926		0.0139532	-1.33362	0.171093	-0.864456	-0.352201			-0.693703	0.187907		0.217124	0.794133		-0.9912	0.0887631		-0.869979	0.139743		0	0	0	0.608736		GO:0030239~myofibril assembly
>sp|Q8WZ42|TITIN_HUMAN Titin OS=Homo sapiens OX=9606 GN=TTN PE=1 SV=4S(2026)	Q8WZ42	TTN	S(2026)	EAITAVELKSRKKDESYEELLRKTKDELLHW	Peptide10332		-0.48746	0.052292	0.123447	-0.10841	-0.458469		0	0.333396	-0.432266	0.252292	-0.511085		-0.374661	0.259479	-0.321715	0.212976	-0.151481		-0.193056	-0.675627	0.268381	-0.0846401	-0.147955			0.256179	0.468771		0.173256	0.719672		0.331849	0.365102		-0.0534534	0.91872		0	0	0.475148	0		GO:0002576~platelet degranulation;GO:0003300~cardiac muscle hypertrophy;GO:0006936~muscle contraction;GO:0006941~striated muscle contraction;GO:0007076~mitotic chromosome condensation;GO:0018108~peptidyl-tyrosine phosphorylation;GO:0030049~muscle filament sliding;GO:0030240~skeletal muscle thin filament assembly;GO:0030241~skeletal muscle myosin thick filament assembly;GO:0035995~detection of mus…
>tr||R4GMQ1|R4GMQ1_HUMAN Lysine-specific histone demethylase 1A OS=Homo sapiens OX=9606 GN=KDM1A PE=1 SV=2S(69)	R4GMQ1	KDM1A	S(69)	AVGERTPRKKEPPRASPPGGLAEPPGSAGPQ	Peptide10333		-1.394	-0.639565	-0.555989	-0.487598	-0.761985		0						-0.541087	-0.522593	-0.373646	-0.74455	-0.511077									0.386467	0.41782		0.502728	0.363765		0.351472	0.489487		0.331015	0.551585		0	0	0.556685	0		D-templated;GO:0000122~negative regulation of transcription from R polymerase II promoter;GO:0000380~altertive mR splicing;GO:0001701~in utero embryonic development;GO:0006351~transcription;GO:0006357~regulation of transcription from R polymerase II promoter;GO:0006482~protein demethylation;GO:0007596~blood coagulation;GO:0008283~cell proliferation;GO:0010569~regulation of double-strand break rep…
>sp|Q86VF2|IGFN1_HUMAN Immunoglobulin-like and fibronectin type III domain-containing protein 1 OS=Homo sapiens OX=9606 GN=IGFN1 PE=1 SV=2T(789)	Q86VF2	IGFN1	T(789)	HILGYLIERRKKGSNTWTAVNDQPVPERRWT	Peptide10334		-1.54068	-1.38203	1.77076	-2.12401	-0.700981		0						-1.30573	-0.751698	0.436999	-0.970041	0.182433									0.356345	0.729693		2.52709	0.0308725		-0.123818	0.912818		1.16393	0.27575		0	0.66536	0	0
>sp|Q9UKX2|MYH2_HUMAN Myosin-2 OS=Homo sapiens OX=9606 GN=MYH2 PE=1 SV=1S(1741)	Q9UKX2	MYH2	S(1741)	NTSLINTKKKLETDISQMQGEMEDILQEARN	Peptide10335		0.0752989	-0.16908	-0.0690357	-0.0516943	0.00674305		0	-0.0964986	0.134545	0.204332	-0.271277		-0.222932	-0.0472184	0.0564776	0.157328	-0.0609733		0.23878	-0.254557	-0.107395	-0.160711	0.0369932			-0.164625	0.391498		-0.019139	0.955947		0.014527	0.952393		-0.0949154	0.693788		0	0	0	0		GO:0001778~plasma membrane repair;GO:0006936~muscle contraction;GO:0014823~response to activity;GO:0030049~muscle filament sliding;GO:0038096~Fc-gamma receptor sigling pathway involved in phagocytosis
>sp|Q9UKX2|MYH2_HUMAN Myosin-2 OS=Homo sapiens OX=9606 GN=MYH2 PE=1 SV=1T(1738)	Q9UKX2	MYH2	T(1738)	HTQNTSLINTKKKLETDISQMQGEMEDILQE	Peptide10336		0.102588	-0.142644	-0.0606931	-0.0759496	0.0378174		0	-0.0670128	0.106282	0.170529	-0.223281		-0.230818	-0.0720852	0.0207153	0.240864	0.0415496		0.367532	-0.27785	-0.0704596	-0.149994	0.0150006			-0.199723	0.324882		-0.0608642	0.854375		-0.0134631	0.959362		-0.0920536	0.730535		0	0	0	0		GO:0001778~plasma membrane repair;GO:0006936~muscle contraction;GO:0014823~response to activity;GO:0030049~muscle filament sliding;GO:0038096~Fc-gamma receptor sigling pathway involved in phagocytosis
>sp|P13533|MYH6_HUMAN Myosin-6 OS=Homo sapiens OX=9606 GN=MYH6 PE=1 SV=5S(1632)	P13533	MYH6	S(1632)	KKKMEGDLNEMEIQLSHANRMAAEAQKQVKS	Peptide10337		-0.511154	0.164503	-0.191785	-0.118681	-0.4773		0	0.0167416	-0.6472	-0.55029	-0.0570278		-0.179809	-0.0753916	-0.0999095	-0.429148	-0.447672		-0.289954	0.184484	-0.401437	-0.122703	-0.334018			0.317814	0.175569		-0.0898533	0.812025		-0.0599761	0.840495		-0.0837751	0.805478		0	0	0.405567	0		GO:0001701~in utero embryonic development;GO:0002026~regulation of the force of heart contraction;GO:0002027~regulation of heart rate;GO:0006470~protein dephosphorylation;GO:0006936~muscle contraction;GO:0006941~striated muscle contraction;GO:0007512~adult heart development;GO:0007522~visceral muscle development;GO:0008016~regulation of heart contraction;GO:0008217~regulation of blood pressure;GO…
>sp|P13533|MYH6_HUMAN Myosin-6 OS=Homo sapiens OX=9606 GN=MYH6 PE=1 SV=5T(1711)	P13533	MYH6	T(1711)	QTERSRKLAEQELIETSERVQLLHSQNTSLI	Peptide10338		0.11655	0.416195	-0.0550843	-0.245935	-0.279397		0	0.350992	-0.256212	-0.474193	0.0349896		0.095942	0.00534142	-0.1442	-0.18572	-0.170773		0.00682746	0.249206	-0.189598	-0.0584626	-0.24528			0.200604	0.256067		-0.216103	0.285657		-0.295907	0.125022		-0.219945	0.272865		0	0	0	0.4236		GO:0001701~in utero embryonic development;GO:0002026~regulation of the force of heart contraction;GO:0002027~regulation of heart rate;GO:0006470~protein dephosphorylation;GO:0006936~muscle contraction;GO:0006941~striated muscle contraction;GO:0007512~adult heart development;GO:0007522~visceral muscle development;GO:0008016~regulation of heart contraction;GO:0008217~regulation of blood pressure;GO…
>sp|P12883|MYH7_HUMAN Myosin-7 OS=Homo sapiens OX=9606 GN=MYH7 PE=1 SV=5S(948)	P12883	MYH7	S(948)	ELTAKKRKLEDECSELKRDIDDLELTLAK	Peptide10339		-1.43502	0.42618	-1.19077	-0.305748	-0.562836		0	-0.685724	-1.19056	-1.35264	-0.0162093		0.327579	-1.04211	-0.646673	-0.783681	-0.293698		-0.712227	0.889949	-0.709009	-0.272881	-0.918553			0.351991	0.634186		-0.479334	0.597991		-0.223819	0.786904		0.00709411	0.994807		0	0	0.403607	0		GO:0002026~regulation of the force of heart contraction;GO:0002027~regulation of heart rate;GO:0003009~skeletal muscle contraction;GO:0006936~muscle contraction;GO:0006941~striated muscle contraction;GO:0007512~adult heart development;GO:0014728~regulation of the force of skeletal muscle contraction;GO:0014883~transition between fast and slow fiber;GO:0014898~cardiac muscle hypertrophy in respons…
>sp|Q14515|SPRL1_HUMAN SPARC-like protein 1 OS=Homo sapiens OX=9606 GN=SPARCL1 PE=1 SV=2S(198)	Q14515	SPARCL1	S(198)	QGLRDQGNQEQDPNISNGEEEEEKEPGEVGT	Peptide1034		0.511953	0.0179827	-0.100913	-0.0431429	0.410149		0	-0.105539	-0.188392	-0.204878	0.647491		0.482907	0.118169	-0.0402742	-0.177354	0.129051		0.150623	0.585515	0.207062	0.244486	-0.232131			-0.132339	0.706459		-0.317	0.390492		-0.331593	0.324279		-0.0477308	0.920819		0	0	0	0.539037		GO:0007165~sigl transduction;GO:0048856~atomical structure development
>sp|P02545|LM_HUMAN Prelamin-A/C OS=Homo sapiens OX=9606 GN=LM PE=1 SV=1S(423)	P02545	LM	S(423)	QTQGGGSVTKKRKLESTESRSSFSQHARTSG	Peptide10340		-2.822	2.34794	1.33336	-1.20429	0.540795		0	0.670344	0.938504	0.957227	-0.327376		-1.21875	-0.296145	2.15481	-0.422993	0.704036		-1.58902	1.14691	0.436115	-1.38206	1.76333			2.3747	0.0234358		2.62314	0.0237889		0.894415	0.449004		2.07764	0.0785461		0	0.651713	0	0		GO:0007077~mitotic nuclear envelope disassembly;GO:0007084~mitotic nuclear envelope reassembly;GO:0007517~muscle organ development;GO:0030334~regulation of cell migration;GO:0030951~establishment or maintence of microtubule cytoskeleton polarity;GO:0034504~protein localization to nucleus;GO:0035105~sterol regulatory element binding protein import into nucleus;GO:0036498~IRE1-mediated unfolded pro…
>sp|Q8WZ42|TITIN_HUMAN Titin OS=Homo sapiens OX=9606 GN=TTN PE=1 SV=4S(8426)	Q8WZ42	TTN	S(8426)	GSIALKAPPRFVKKLSDISTVVGKEVQLQTT	Peptide10341		0.405546	0.0121969	-0.10624	-0.266563	-0.521301		0	0.191973	-0.270763	-0.0393453	-0.46105		-0.506468	-0.180819	0.115051	-0.0911898	-0.495082		0.217226	-0.546655	-0.35956	-0.139571	-0.321179			-0.159902	0.612008		-0.184454	0.639652		-0.163244	0.621648		-0.478729	0.129647		0	0	0	0.517479		GO:0002576~platelet degranulation;GO:0003300~cardiac muscle hypertrophy;GO:0006936~muscle contraction;GO:0006941~striated muscle contraction;GO:0007076~mitotic chromosome condensation;GO:0018108~peptidyl-tyrosine phosphorylation;GO:0030049~muscle filament sliding;GO:0030240~skeletal muscle thin filament assembly;GO:0030241~skeletal muscle myosin thick filament assembly;GO:0035995~detection of mus…
>sp|Q8WZ42|TITIN_HUMAN Titin OS=Homo sapiens OX=9606 GN=TTN PE=1 SV=4S(8429)	Q8WZ42	TTN	S(8429)	ALKAPPRFVKKLSDISTVVGKEVQLQTTIEG	Peptide10342		0.181076	0.216721	0.0523942	-0.0272675	0.0428998		0	0.309965	0.234482	-0.0499315	0.018513		0.139516	0.28691	-0.00950616	-0.0788777	0.0561442		-0.128434	0.0679044	0.204279	0.0577035	0.0696315			0.172336	0.232956		0.0723729	0.735049		-0.0726326	0.67036		-0.0012422	0.995428		0	0	0	0		GO:0002576~platelet degranulation;GO:0003300~cardiac muscle hypertrophy;GO:0006936~muscle contraction;GO:0006941~striated muscle contraction;GO:0007076~mitotic chromosome condensation;GO:0018108~peptidyl-tyrosine phosphorylation;GO:0030049~muscle filament sliding;GO:0030240~skeletal muscle thin filament assembly;GO:0030241~skeletal muscle myosin thick filament assembly;GO:0035995~detection of mus…
>sp|Q8WZ42|TITIN_HUMAN Titin OS=Homo sapiens OX=9606 GN=TTN PE=1 SV=4S(7485)	Q8WZ42	TTN	S(7485)	CSVKFKEPPRFVKKLSDTSTLIGDAVELRAI	Peptide10343		0.170574	-0.0775925	0.126895	-0.209414	-0.186909		0	-0.0254015	0.0261372	0.182962	-0.266943		-0.0962156	-0.00573433	-0.00948195	-0.10803	-0.0835041		0.123708	-0.333022	-0.156362	-0.0239051	-0.0645203			-0.159954	0.370528		-0.0527195	0.854375		-0.0891136	0.659971		-0.199986	0.312217		0	0	0	0		GO:0002576~platelet degranulation;GO:0003300~cardiac muscle hypertrophy;GO:0006936~muscle contraction;GO:0006941~striated muscle contraction;GO:0007076~mitotic chromosome condensation;GO:0018108~peptidyl-tyrosine phosphorylation;GO:0030049~muscle filament sliding;GO:0030240~skeletal muscle thin filament assembly;GO:0030241~skeletal muscle myosin thick filament assembly;GO:0035995~detection of mus…
>tr||Q6ZN40|Q6ZN40_HUMAN >tr|opomyosin 1 (Alpha); isoform CRA_f OS=Homo sapiens OX=9606 GN=TPM1 PE=1 SV=1S(216)	Q6ZN40	TPM1	S(216)	DRKYEEVARKLVIIESDLERAEERAELSEGK	Peptide10344		-0.651715	-0.444783	-0.390384	-1.1042	-0.861808		0						-0.324854	-0.920754	-0.342305	-1.09579	-0.387503									-0.194485	0.638996		0.12194	0.843633		-0.611707	0.170754		-0.136371	0.798514		0	0.476691	0	0		GO:0001701~in utero embryonic development;GO:0003065~positive regulation of heart rate by epinephrine;GO:0006928~movement of cell or subcellular component;GO:0006936~muscle contraction;GO:0006937~regulation of muscle contraction;GO:0007010~cytoskeleton organization;GO:0007015~actin filament organization;GO:0008016~regulation of heart contraction;GO:0008360~regulation of cell shape;GO:0030049~musc…
>sp|Q6P5Q4|LMOD2_HUMAN Leiomodin-2 OS=Homo sapiens OX=9606 GN=LMOD2 PE=1 SV=2T(516)	Q6P5Q4	LMOD2	T(516)	RSVQEKKMEDSSRPSTPQRSAHENLMEAIRG	Peptide10345		0.188768	-0.624441	-0.175747	0.0458693	0.116071		0	-0.609114	-0.634527	0.1894	0.330311		0.305356	-0.116296	-0.586963	-0.150392	0.134785		0.183377	-0.31122	-0.45481	0.415232	-0.127923			-0.584643	0.0140668		-0.632387	0.0169057		-0.044348	0.885307		-0.0560642	0.875954		0.505461	0	0	0		GO:0006936~muscle contraction;GO:0007015~actin filament organization;GO:0030041~actin filament polymerization;GO:0030239~myofibril assembly;GO:0030838~positive regulation of actin filament polymerization;GO:0045010~actin nucleation;GO:0045214~sarcomere organization;GO:0051694~pointed-end actin filament capping
>sp|Q8WZ42|TITIN_HUMAN Titin OS=Homo sapiens OX=9606 GN=TTN PE=1 SV=4T(8836)	Q8WZ42	TTN	T(8836)	TPPISVTWKKNGINVTPSQRCNITTTEKSAI	Peptide10346		0.265241	0.168916	-0.184686	-0.228562	-0.141292		0	0.146016	-0.250065	-0.203054	-0.00599462		-0.0287946	-0.0377019	-0.00230241	-0.298337	-0.267941		-0.131715	0.0579029	-0.17722	-0.0864797	-0.160981			0.0576003	0.76047		-0.179751	0.335649		-0.230291	0.185845		-0.170235	0.359213		0	0	0	0.470852		GO:0002576~platelet degranulation;GO:0003300~cardiac muscle hypertrophy;GO:0006936~muscle contraction;GO:0006941~striated muscle contraction;GO:0007076~mitotic chromosome condensation;GO:0018108~peptidyl-tyrosine phosphorylation;GO:0030049~muscle filament sliding;GO:0030240~skeletal muscle thin filament assembly;GO:0030241~skeletal muscle myosin thick filament assembly;GO:0035995~detection of mus…
>sp|Q8WZ42|TITIN_HUMAN Titin OS=Homo sapiens OX=9606 GN=TTN PE=1 SV=4T(11920)	Q8WZ42	TTN	T(11920)	PEPPPPKPVEEVEVPTVTKRERKIPEPTKVP	Peptide10347		0.855931	-1.674	-1.00765	-1.30858	-1.24488		0	-1.36221	-0.470951	-1.08343	-1.53834		-0.623116	-1.56269	-0.145737	-1.4891	-1.45039		0.148191	-1.94091	-0.690271	-1.49593	-1.26007			-1.7302	0.000177881		-0.673904	0.112929		-1.43951	0.00720924		-1.46867	0.002922		0	0	0	0.639592		GO:0002576~platelet degranulation;GO:0003300~cardiac muscle hypertrophy;GO:0006936~muscle contraction;GO:0006941~striated muscle contraction;GO:0007076~mitotic chromosome condensation;GO:0018108~peptidyl-tyrosine phosphorylation;GO:0030049~muscle filament sliding;GO:0030240~skeletal muscle thin filament assembly;GO:0030241~skeletal muscle myosin thick filament assembly;GO:0035995~detection of mus…
>sp|Q14324|MYPC2_HUMAN Myosin-binding protein C; fast-type OS=Homo sapiens OX=9606 GN=MYBPC2 PE=1 SV=2S(60)	Q14324	MYBPC2	S(60)	PTAEEPTGVFLKKPDSVSVETGKDAVVVAKV	Peptide10348		0.445425	0.422212	0.209728	-0.285306	0.316128		0	0.14203	0.245329	-0.0100288	0.393945		0.329985	-0.11054	0.41579	-0.137777	-0.0246501		-0.20434	0.44164	0.364436	0.0758098	0.030862			0.0810678	0.788061		0.166053	0.628673		-0.232093	0.400255		0.0363037	0.927404		0	0	0	0.479494		GO:0006936~muscle contraction;GO:0007155~cell adhesion;GO:0030049~muscle filament sliding
>tr||A0A0A0MTS7|A0A0A0MTS7_HUMAN Titin OS=Homo sapiens OX=9606 GN=TTN PE=1 SV=1T(13320)	A0A0A0MTS7	TTN	T(13320)	KVVPVKKVPTVKKPETPAAKVPEVPKKLVPV	Peptide10349		-1.03938	0.00160201	0.564009	-1.09137	2.45599		0	-0.647766	1.32245	-1.1691	1.67561		0.821834	-0.152529	0.835223	-0.0686169	1.55665		-0.0206231	1.26947	2.4555	-1.67354	1.12971			0.177237	0.858506		1.35384	0.118712		-0.941115	0.277759		1.76403	0.0466277		0	0.384505	0	0		GO:0002576~platelet degranulation;GO:0003300~cardiac muscle hypertrophy;GO:0006936~muscle contraction;GO:0006941~striated muscle contraction;GO:0007076~mitotic chromosome condensation;GO:0018108~peptidyl-tyrosine phosphorylation;GO:0030049~muscle filament sliding;GO:0030240~skeletal muscle thin filament assembly;GO:0030241~skeletal muscle myosin thick filament assembly;GO:0035995~detection of mus…
>sp|Q15836|VAMP3_HUMAN Vesicle-associated membrane protein 3 OS=Homo sapiens OX=9606 GN=VAMP3 PE=1 SV=3S(44)	Q15836	VAMP3	S(44)	MRVNVDKVLERDQKLSELDDRADALQAGASQ	Peptide1035		-0.10336	1.23656	0.430011	-0.102895	-0.0439135		0	0.859546	0.562976	0.722997	-0.347729		-0.386758	0.193118	0.76367	0.330025	-0.094146		-0.226504	0.657684	-0.243439	-0.0830057	0.522269			0.915883	0.0229785		0.55746	0.228395		0.395936	0.380061		0.188276	0.733885		0	0	0.432002	0		endosome to Golgi;GO:0001921~positive regulation of receptor recycling;GO:0006461~protein complex assembly;GO:0006887~exocytosis;GO:0006904~vesicle docking involved in exocytosis;GO:0006906~vesicle fusion;GO:0016192~vesicle-mediated transport;GO:0017156~calcium ion regulated exocytosis;GO:0034446~substrate adhesion-dependent cell spreading;GO:0035493~SRE complex assembly;GO:0042147~retrograde tra…
>sp|O60318|GANP_HUMAN Germil-center associated nuclear protein OS=Homo sapiens OX=9606 GN=MCM3AP PE=1 SV=2S(527)	O60318	MCM3AP	S(527)	KPFSLKEKKPGDGEVSPSTEDAPFQHSPLGK	Peptide10350		-0.218166	0.0392953	0.42755	-0.152675	0.131022		0	-0.0579366	0.183338	-0.130151	0.230631		0.0998747	0.0553087	0.235382	-0.25201	0.130398		-0.0838387	0.252279	0.0511652	-0.169777	0.2579			0.122769	0.462867		0.274891	0.112929		-0.125621	0.477701		0.238021	0.173687		0	0.491829	0	0		GO:0002376~immune system process;GO:0006260~D replication;GO:0006606~protein import into nucleus;GO:0051028~mR transport
>sp|Q96JM3|CHAP1_HUMAN Chromosome alignment-maintaining phosphoprotein 1 OS=Homo sapiens OX=9606 GN=CHAMP1 PE=1 SV=2S(507)	Q96JM3	CHAMP1	S(507)	VFPETRKPGPSGPSESPKAASDIWKPVLSID	Peptide10351		-0.728552	0.218575	0.390154	-0.173133	0.473628		0	0.0675851	0.259509	-0.0664242	0.342165		0.188878	-0.00465332	0.039741	0.230592	0.204776		-0.385004	0.313865	0.151156	-0.452901	0.808083			0.380012	0.203198		0.441309	0.192587		0.115703	0.752264		0.688333	0.0418606		0	0.587386	0	0		GO:0031134~sister chromatid biorientation;GO:0034501~protein localization to kinetochore;GO:0035372~protein localization to microtubule;GO:0051315~attachment of mitotic spindle microtubules to kinetochore
>sp|Q05519|SRS11_HUMAN Serine/arginine-rich splicing factor 11 OS=Homo sapiens OX=9606 GN=SRSF11 PE=1 SV=1T(447)	Q05519	SRSF11	T(447)	YDSEKEKKEEKKPIETGSPKTKECSVEKGTG	Peptide10352		-1.35826	-0.788954	-0.410479	-0.841313	-0.647734		0						-0.447673	-0.871532	-0.490236	-0.586671	-0.312217									0.0727215	0.903904		0.452607	0.449809		0.188972	0.739631		0.422989	0.463147		0	0.534237	0	0		GO:0000398~mR splicing;GO:0006369~termition of R polymerase II transcription;GO:0006397~mR processing;GO:0006405~R export from nucleus;GO:0006406~mR export from nucleus;GO:0008380~R splicing;GO:0031124~mR 3'-end processing;via spliceosome
>sp|Q86TN4|>tr|PT1_HUMAN >tr| 2'-phospho>tr|ansferase 1 OS=Homo sapiens OX=9606 GN=>tr|PT1 PE=1 SV=2T(235)	Q86TN4	TRPT1	T(235)	LRPTRKPLSLAGDEETECQSSPKHSSRERRR	Peptide10353		-0.352583	-0.902742	-0.499525	-1.08456	-1.12602		0						-0.267665	-1.39176	-0.462792	-0.871412	-0.805181									-0.837127	0.0308938		-0.171035	0.726044		-0.667863	0.104951		-0.655474	0.114581		0	0	0	0.42261		GO:0006388~tR splicing;GO:0045859~regulation of protein kise activity;via endonucleolytic cleavage and ligation
>sp|Q8WZ42|TITIN_HUMAN Titin OS=Homo sapiens OX=9606 GN=TTN PE=1 SV=4T(9280)	Q8WZ42	TTN	T(9280)	VIKEPKKPPVFDQHLTPVTVSEGEYVQLSCH	Peptide10354		-1.13861	-0.851337	-0.139959	-0.539115	-0.81301		0						-0.515368	-0.813321	-0.177989	-0.812271	-0.371578									-0.00533989	0.991114		0.668015	0.167774		0.151296	0.752828		0.234695	0.64292		0	0.607543	0	0		GO:0002576~platelet degranulation;GO:0003300~cardiac muscle hypertrophy;GO:0006936~muscle contraction;GO:0006941~striated muscle contraction;GO:0007076~mitotic chromosome condensation;GO:0018108~peptidyl-tyrosine phosphorylation;GO:0030049~muscle filament sliding;GO:0030240~skeletal muscle thin filament assembly;GO:0030241~skeletal muscle myosin thick filament assembly;GO:0035995~detection of mus…
>sp|Q96JM3|CHAP1_HUMAN Chromosome alignment-maintaining phosphoprotein 1 OS=Homo sapiens OX=9606 GN=CHAMP1 PE=1 SV=2S(445)	Q96JM3	CHAMP1	S(445)	IRSPAGSPELRKPSGSPDLWKLSPDQRKTSP	Peptide10355		0.0286247	-0.107978	-0.132058	0.0445968	0.0266797		0	-0.111474	-0.00954992	0.0628493	0.000183409		-0.151702	-0.136556	0.208545	-0.051853	-0.397721		-0.291437	-0.163867	-0.172052	0.00608232	0.141121			-0.0263401	0.913631		0.0773497	0.789645		0.119047	0.578586		0.0461943	0.867738		0	0	0	0		GO:0031134~sister chromatid biorientation;GO:0034501~protein localization to kinetochore;GO:0035372~protein localization to microtubule;GO:0051315~attachment of mitotic spindle microtubules to kinetochore
>sp|Q13425|SNTB2_HUMAN Beta-2-syn>tr|ophin OS=Homo sapiens OX=9606 GN=SNTB2 PE=1 SV=1S(222)	Q13425	SNTB2	S(222)	PSLVSDLPWEGAAPQSPSFSGSEDSGSPKHQ	Peptide10356		-1.62548	-0.518368	-0.489081	-2.26594	-0.385827		0						-1.08316	-0.429782	0.0627441	-1.4345	-0.593248									0.880243	0.117202		1.14115	0.0793036		-0.495901	0.40066		0.864781	0.169764		0	0.670012	0	0
>sp|Q13203|MYBPH_HUMAN Myosin-binding protein H OS=Homo sapiens OX=9606 GN=MYBPH PE=1 SV=4S(445)	Q13203	MYBPH	S(445)	ALSEQGVCTLEIRKPSPFDSGVYTCKAINVL	Peptide10357		0.614112	0.200597	0.0763246	-1.09039	-0.249775		0	0.0231539	0.00400524	0.279318	-0.585107		-0.285014	0.00703443	0.30311	-0.828356	-0.117471		0.123347	-0.595103	0.103572	-0.29075	-0.462782			-0.204191	0.652932		0.00864167	0.991772		-0.595656	0.182958		-0.466895	0.320515		0	0	0	0.649315		GO:0006942~regulation of striated muscle contraction;GO:0007155~cell adhesion
>sp|Q96JM3|CHAP1_HUMAN Chromosome alignment-maintaining phosphoprotein 1 OS=Homo sapiens OX=9606 GN=CHAMP1 PE=1 SV=2S(282)	Q96JM3	CHAMP1	S(282)	SRKSARTTSPEPRKPSPSESPEPWKPFPAVS	Peptide10358		-1.13085	-0.747723	-0.705654	-0.657534	-0.908589		0						-0.484162	-1.17409	-0.601209	-0.752143	-0.417574									-0.153396	0.767855		0.154077	0.827731		0.10267	0.852063		0.144427	0.816851		0	0	0.52608	0		GO:0031134~sister chromatid biorientation;GO:0034501~protein localization to kinetochore;GO:0035372~protein localization to microtubule;GO:0051315~attachment of mitotic spindle microtubules to kinetochore
>sp|Q8WZ42|TITIN_HUMAN Titin OS=Homo sapiens OX=9606 GN=TTN PE=1 SV=4S(5795)	Q8WZ42	TTN	S(5795)	ATLFVKEPPQFIKKPSPVLVLRNGQSTTFEC	Peptide10359		-0.237903	-0.223789	-0.194989	-0.265705	-0.377803		0	-0.209739	-0.067444	0.24383	-0.67965		-0.387028	-0.112327	-0.0840661	-0.266814	-0.212395		-0.165038	-0.81994	-0.179137	-0.122235	-0.148904			-0.143957	0.612773		0.066083	0.883401		0.0947613	0.762539		-0.157196	0.627079		0	0	0.328878	0		GO:0002576~platelet degranulation;GO:0003300~cardiac muscle hypertrophy;GO:0006936~muscle contraction;GO:0006941~striated muscle contraction;GO:0007076~mitotic chromosome condensation;GO:0018108~peptidyl-tyrosine phosphorylation;GO:0030049~muscle filament sliding;GO:0030240~skeletal muscle thin filament assembly;GO:0030241~skeletal muscle myosin thick filament assembly;GO:0035995~detection of mus…
>sp|P00338|LDHA_HUMAN L-lactate dehydrogese A chain OS=Homo sapiens OX=9606 GN=LDHA PE=1 SV=2Y(10)	P00338	LDHA	Y(10)	______MATLKDQLIYNLLKEEQTPQNKITV	Peptide1036		-0.00450308	-0.00403419	-0.0319873	-0.119273	0.0959503		0	-0.029663	0.178503	0.160583	-0.110874		-0.0809161	-0.0832074	0.0409619	-0.0896872	0.206979		-0.11216	-0.26497	0.0591261	-0.0825722	0.192373			-0.0460739	0.804958		0.111046	0.597991		0.0166574	0.934007		0.145502	0.432896		0	0	0	0		GO:0001666~response to hypoxia;GO:0005975~carbohydrate metabolic process;GO:0006089~lactate metabolic process;GO:0006090~pyruvate metabolic process;GO:0006096~glycolytic process;GO:0007584~response to nutrient;GO:0009749~response to glucose;GO:0019674~D metabolic process;GO:0019752~carboxylic acid metabolic process;GO:0021762~substantia nigra development;GO:0042493~response to drug;GO:0042542~res…
>sp|Q00872|MYPC1_HUMAN Myosin-binding protein C; slow-type OS=Homo sapiens OX=9606 GN=MYBPC1 PE=1 SV=2S(1110)	Q00872	MYBPC1	S(1110)	MFSNQGVCTLEIRKPSPYDGGTYCCKAVNDL	Peptide10360		-0.443405	-0.184428	0.0761133	0.146026	0.0870492		0	-0.484639	0.117423	0.287371	0.14034		0.0580489	-0.102656	0.268921	-0.542522	-0.0677718		-0.764826	-0.206489	-0.180567	0.421681	0.302637			0.0429926	0.920448		0.358018	0.351131		0.365684	0.302551		0.403109	0.27575		0	0	0.486619	0		GO:0007155~cell adhesion;GO:0030049~muscle filament sliding;GO:1903955~positive regulation of protein targeting to mitochondrion
>sp|Q00872|MYPC1_HUMAN Myosin-binding protein C; slow-type OS=Homo sapiens OX=9606 GN=MYBPC1 PE=1 SV=2T(1116)	Q00872	MYBPC1	T(1116)	VCTLEIRKPSPYDGGTYCCKAVNDLGTVEIE	Peptide10361		-0.554654	-0.676982	-0.573077	-0.901691	-0.775726		0						-0.705762	-0.791518	-0.129362	-0.651906	-0.570312									-0.104042	0.783809		0.278989	0.504648		-0.14659	0.700993		-0.0428105	0.93346		0	0.670772	0	0		GO:0007155~cell adhesion;GO:0030049~muscle filament sliding;GO:1903955~positive regulation of protein targeting to mitochondrion
>sp|Q8WZ42|TITIN_HUMAN Titin OS=Homo sapiens OX=9606 GN=TTN PE=1 SV=4S(29908)	Q8WZ42	TTN	S(29908)	GGSKVVGYIIERKPVSEVGDGRWLKCNYTIV	Peptide10362		-0.612582	-0.128669	0.025282	-0.0844895	-0.104142		0	-0.380347	-0.0486656	-0.0554238	-0.138607		0.0135438	-0.240014	-0.160842	-0.108717	0.164679		-0.0127822	-0.0970271	-0.263801	-0.0738793	0.0290958			-0.058559	0.815576		0.0409485	0.917679		0.0723277	0.776583		0.140712	0.588421		0	0	0.468662	0		GO:0002576~platelet degranulation;GO:0003300~cardiac muscle hypertrophy;GO:0006936~muscle contraction;GO:0006941~striated muscle contraction;GO:0007076~mitotic chromosome condensation;GO:0018108~peptidyl-tyrosine phosphorylation;GO:0030049~muscle filament sliding;GO:0030240~skeletal muscle thin filament assembly;GO:0030241~skeletal muscle myosin thick filament assembly;GO:0035995~detection of mus…
>sp|A4UGR9|XIRP2_HUMAN Xin actin-binding repeat-containing protein 2 OS=Homo sapiens OX=9606 GN=XIRP2 PE=1 SV=2S(2318)	A4UGR9	XIRP2	S(2318)	KQNVISKSLDERKQLSIDSANCLSHTVPGTS	Peptide10363		0.233761	-0.644783	0.0265991	-0.329293	-0.569618		0	-0.259341	-0.278537	-0.343236	-0.539151		-0.186795	-0.21582	-0.118528	-0.418005	-0.400196		0.151839	-0.518509	0.160599	-0.619066	-0.552511			-0.459314	0.0209676		-0.102168	0.728335		-0.477101	0.0364037		-0.56507	0.0150788		0	0	0	0.666653		GO:0003281~ventricular septum development;GO:0007507~heart development;GO:0030036~actin cytoskeleton organization;GO:0045216~cell-cell junction organization;GO:0055008~cardiac muscle tissue morphogenesis
>sp|Q6P5Q4|LMOD2_HUMAN Leiomodin-2 OS=Homo sapiens OX=9606 GN=LMOD2 PE=1 SV=2S(491)	Q6P5Q4	LMOD2	S(491)	GQKKKKGKKVKKQPNSILKEIKNSLRSVQEK	Peptide10364		-0.597931	-1.09069	0.606848	-0.128768	-0.0505277		0	-0.835198	0.27263	0.0516518	-0.362621		-0.0749142	-0.0479817	-0.0791798	0.284416	-0.13127		0.65053	-0.587621	0.0970857	-0.50939	0.0120483			-0.634794	0.11205		0.229925	0.689937		-0.0699438	0.89426		-0.127514	0.827137		0.538239	0	0	0		GO:0006936~muscle contraction;GO:0007015~actin filament organization;GO:0030041~actin filament polymerization;GO:0030239~myofibril assembly;GO:0030838~positive regulation of actin filament polymerization;GO:0045010~actin nucleation;GO:0045214~sarcomere organization;GO:0051694~pointed-end actin filament capping
>sp|P17096|HMGA1_HUMAN High mobility group protein HMG-I/HMG-Y OS=Homo sapiens OX=9606 GN=HMGA1 PE=1 SV=3S(36)	P17096	HMGA1	S(36)	TEKRGRGRPRKQPPVSPGTALVGSQKEPSEV	Peptide10365		-0.498255	0.651209	0.896577	-0.4624	1.15795		0	0.361361	0.5582	0.09114	0.838363		-0.2731	0.631034	1.10439	0.55482	0.272101		0.482973	0.939958	0.892956	-0.499127	0.688666			0.717986	0.0673948		0.935126	0.0321346		-0.00679642	0.989301		0.811365	0.068841		0	0.586749	0	0		D-templated;GO:0006268~D unwinding involved in D replication;GO:0006284~base-excision repair;GO:0006337~nucleosome disassembly;GO:0006355~regulation of transcription;GO:0006366~transcription from R polymerase II promoter;GO:0006461~protein complex assembly;GO:0008285~negative regulation of cell proliferation;GO:0009615~response to virus;GO:0031936~negative regulation of chromatin silencing;GO:003…
>tr||D6R937|D6R937_HUMAN Aminoacyl >tr| synthase complex-interacting multifunctiol protein 1 (Fragment) OS=Homo sapiens OX=9606 GN=AIMP1 PE=1 SV=1S(140)	D6R937	AIMP1	S(140)	EKIEKKGEKKEKKQQSIAGSADSKPI_____	Peptide10366		-0.733443	-0.638327	-0.540901	-1.35394	-0.302154		0						-0.577785	-0.921721	-0.104773	-0.825695	-0.317254									-0.12441	0.781207		0.332777	0.500101		-0.434206	0.314497		0.34591	0.455886		0	0.645056	0	0		GO:0001525~angiogenesis;GO:0001937~negative regulation of endothelial cell proliferation;GO:0006006~glucose metabolic process;GO:0006418~tR aminoacylation for protein translation;GO:0006915~apoptotic process;GO:0006935~chemotaxis;GO:0006954~inflammatory response;GO:0007155~cell adhesion;GO:0007165~sigl transduction;GO:0007267~cell-cell sigling;GO:0009611~response to wounding;GO:0050900~leukocyte …
>sp|Q0ZGT2|NEXN_HUMAN Nexilin OS=Homo sapiens OX=9606 GN=NEXN PE=1 SV=1S(564)	Q0ZGT2	NEXN	S(564)	AALQKKREEEEEEEGSIMNGSTAEDEEQTRS	Peptide10367		0.291445	-0.67522	-0.134025	0.425849	0.0982117		0	-0.387796	-0.219044	0.260619	0.095594		0.290221	-0.493511	-0.486526	0.48385	0.130624		0.0722839	-0.146999	-0.123019	-0.0790953	0.175545			-0.589369	0.00732821		-0.404141	0.0879101		0.109318	0.669057		-0.038494	0.908748		0.583917	0	0	0		GO:0030334~regulation of cell migration;GO:0048739~cardiac muscle fiber development;GO:0051493~regulation of cytoskeleton organization
>sp|Q99590|SCAFB_HUMAN Protein SCAF11 OS=Homo sapiens OX=9606 GN=SCAF11 PE=1 SV=2S(816)	Q99590	SCAF11	S(816)	WSPNKDTPQEKKRPQSPSPRRETGKESRKSQ	Peptide10368		-1.00604	-0.371479	-0.199862	0.0183973	-0.106689		0	-0.503904	-0.207578	-0.6122	-0.0691294		0.00819254	-0.33387	-0.562728	-0.22222	0.518145		0.164059	0.100574	-0.601917	-0.539463	0.215012			-0.0687224	0.887154		-0.184574	0.738727		-0.130424	0.777157		0.347782	0.436596		0	0	0.357863	0		GO:0000245~spliceosomal complex assembly;GO:0000375~R splicing;GO:0006397~mR processing;GO:0008380~R splicing;via transesterification reactions
>tr||E9PCK9|E9PCK9_HUMAN Muscular LM-interacting protein (Fragment) OS=Homo sapiens OX=9606 GN=MLIP PE=1 SV=1S(415)	E9PCK9	MLIP	S(415)	DQKEKQTPPTPKKSLSSCSLRAGSPDQGELQ	Peptide10369		-0.587637	0.261703	-0.24093	-0.178824	0.0247936		0	-0.292144	-0.322063	0.206792	-0.0576064		0.0557529	0.225701	0.0412446	-0.335962	-0.29342		-0.297415	0.420787	-0.196184	0.24227	-0.316613			0.361336	0.203509		0.0278417	0.958866		0.190894	0.560747		0.0466133	0.917398		0	0	0.490319	0
>sp|P00338|LDHA_HUMAN L-lactate dehydrogese A chain OS=Homo sapiens OX=9606 GN=LDHA PE=1 SV=2T(18)	P00338	LDHA	T(18)	TLKDQLIYNLLKEEQTPQNKITVVGVGAVGM	Peptide1037		0.267489	0.0417004	-0.372245	-0.101879	0.017961		0	0.248135	0.164999	0.204931	-0.236158		0.0661746	-0.165066	-0.464045	-0.181003	0.214135		-0.641951	-0.737592	-0.310027	-0.069047	0.628477			-0.076134	0.873075		-0.168258	0.766601		0.0403223	0.933678		0.233176	0.620187		0	0	0.321191	0		GO:0001666~response to hypoxia;GO:0005975~carbohydrate metabolic process;GO:0006089~lactate metabolic process;GO:0006090~pyruvate metabolic process;GO:0006096~glycolytic process;GO:0007584~response to nutrient;GO:0009749~response to glucose;GO:0019674~D metabolic process;GO:0019752~carboxylic acid metabolic process;GO:0021762~substantia nigra development;GO:0042493~response to drug;GO:0042542~res…
>sp|Q9NP98|MYOZ1_HUMAN Myozenin-1 OS=Homo sapiens OX=9606 GN=MYOZ1 PE=1 SV=1T(23)	Q9NP98	MYOZ1	T(23)	APNKKRKSSKLIMELTGGGQESSGLNLGKKI	Peptide10370		0.273526	-0.306173	0.0389965	0.145667	-0.412636		0	-0.016414	0.219796	0.0615465	-0.445917		-0.565268	-0.197976	0.409249	-0.207251	-0.092985		0.0516386	-0.706862	0.0695361	-0.0133205	-0.146453			-0.24683	0.394008		0.24442	0.489871		0.0566863	0.872929		-0.214472	0.526666		0.369878	0	0	0		GO:0030239~myofibril assembly
>sp|Q8WZ42|TITIN_HUMAN Titin OS=Homo sapiens OX=9606 GN=TTN PE=1 SV=4T(14674)	Q8WZ42	TTN	T(14674)	KQDKRITIENVPKKSTVTIVDSKRSDTGTYI	Peptide10371		-0.510088	-0.7616	-0.68359	-1.42599	-0.610847		0						-0.572492	-1.02518	-0.432548	-0.742617	-0.529464									-0.352099	0.39209		-0.0167786	0.980648		-0.543015	0.229764		-0.0288654	0.963569		0	0.531266	0	0		GO:0002576~platelet degranulation;GO:0003300~cardiac muscle hypertrophy;GO:0006936~muscle contraction;GO:0006941~striated muscle contraction;GO:0007076~mitotic chromosome condensation;GO:0018108~peptidyl-tyrosine phosphorylation;GO:0030049~muscle filament sliding;GO:0030240~skeletal muscle thin filament assembly;GO:0030241~skeletal muscle myosin thick filament assembly;GO:0035995~detection of mus…
>sp|Q8WZ42|TITIN_HUMAN Titin OS=Homo sapiens OX=9606 GN=TTN PE=1 SV=4T(20764)	Q8WZ42	TTN	T(20764)	VVQKRDAERKSWSTVTTECSKTSFRVANLEE	Peptide10372		-0.223252	-0.125352	-0.0675044	0.140255	0.0727188		0	-0.317841	0.050204	0.48687	-0.0789372		-0.121643	-0.165086	0.106163	-0.00097103	-0.0872644		-0.271471	-0.262895	-0.401263	0.27072	0.285701			-0.0637022	0.797807		0.0759914	0.820211		0.37831	0.0962846		0.202146	0.416405		0	0	0.414624	0		GO:0002576~platelet degranulation;GO:0003300~cardiac muscle hypertrophy;GO:0006936~muscle contraction;GO:0006941~striated muscle contraction;GO:0007076~mitotic chromosome condensation;GO:0018108~peptidyl-tyrosine phosphorylation;GO:0030049~muscle filament sliding;GO:0030240~skeletal muscle thin filament assembly;GO:0030241~skeletal muscle myosin thick filament assembly;GO:0035995~detection of mus…
>sp|Q8WZ42|TITIN_HUMAN Titin OS=Homo sapiens OX=9606 GN=TTN PE=1 SV=4S(20768)	Q8WZ42	TTN	S(20768)	RDAERKSWSTVTTECSKTSFRVANLEEGKSY	Peptide10373		0.25152	-0.0365845	-0.0342991	0.0982353	-0.0249801		0	0.0230173	-0.120997	-0.041376	0.145897		-0.154144	-0.1183	0.187838	-0.0739057	-0.160935		-0.00782993	0.0131677	-0.242135	0.053047	0.0610013			-0.0520614	0.80189		-0.0747849	0.779749		-0.0133863	0.95338		-0.0171408	0.951726		0	0	0	0		GO:0002576~platelet degranulation;GO:0003300~cardiac muscle hypertrophy;GO:0006936~muscle contraction;GO:0006941~striated muscle contraction;GO:0007076~mitotic chromosome condensation;GO:0018108~peptidyl-tyrosine phosphorylation;GO:0030049~muscle filament sliding;GO:0030240~skeletal muscle thin filament assembly;GO:0030241~skeletal muscle myosin thick filament assembly;GO:0035995~detection of mus…
>sp|Q8WZ42|TITIN_HUMAN Titin OS=Homo sapiens OX=9606 GN=TTN PE=1 SV=4T(20765)	Q8WZ42	TTN	T(20765)	VQKRDAERKSWSTVTTECSKTSFRVANLEEG	Peptide10374		-0.36366	-0.253987	-0.716396	-0.494641	-1.06179		0						-0.680088	-0.532726	-0.136156	-0.939144	-0.5604									0.128517	0.815182		0.0955975	0.908793		-0.195019	0.724169		-0.289219	0.617934		0	0.420765	0	0		GO:0002576~platelet degranulation;GO:0003300~cardiac muscle hypertrophy;GO:0006936~muscle contraction;GO:0006941~striated muscle contraction;GO:0007076~mitotic chromosome condensation;GO:0018108~peptidyl-tyrosine phosphorylation;GO:0030049~muscle filament sliding;GO:0030240~skeletal muscle thin filament assembly;GO:0030241~skeletal muscle myosin thick filament assembly;GO:0035995~detection of mus…
>sp|Q8WZ42|TITIN_HUMAN Titin OS=Homo sapiens OX=9606 GN=TTN PE=1 SV=4T(20762)	Q8WZ42	TTN	T(20762)	NYVVQKRDAERKSWSTVTTECSKTSFRVANL	Peptide10375		-0.31644	-0.328262	-0.62368	-0.675622	-0.618089		0						-0.589135	-0.744118	-0.0401819	-0.841926	-0.416884									-0.0834026	0.866213		0.120857	0.854375		-0.305986	0.497106		-0.064699	0.915738		0	0.674169	0	0		GO:0002576~platelet degranulation;GO:0003300~cardiac muscle hypertrophy;GO:0006936~muscle contraction;GO:0006941~striated muscle contraction;GO:0007076~mitotic chromosome condensation;GO:0018108~peptidyl-tyrosine phosphorylation;GO:0030049~muscle filament sliding;GO:0030240~skeletal muscle thin filament assembly;GO:0030241~skeletal muscle myosin thick filament assembly;GO:0035995~detection of mus…
>sp|Q8WZ42|TITIN_HUMAN Titin OS=Homo sapiens OX=9606 GN=TTN PE=1 SV=4S(24006)	Q8WZ42	TTN	S(24006)	KIKNYIVEKREATRKSYAAVVTNCHKNSWKI	Peptide10376		0.0568816	0.227887	-0.156381	0.0502248	-0.0740834		0	0.0446998	-0.0230623	0.165775	-0.0292648		-0.0302295	-0.0783782	0.09552	0.0614985	-0.351214		-0.224616	-0.0878452	-0.306853	0.37115	-0.00616893			0.0760821	0.730398		-0.048203	0.883997		0.211653	0.306832		-0.0656916	0.808473		0	0	0.338582	0		GO:0002576~platelet degranulation;GO:0003300~cardiac muscle hypertrophy;GO:0006936~muscle contraction;GO:0006941~striated muscle contraction;GO:0007076~mitotic chromosome condensation;GO:0018108~peptidyl-tyrosine phosphorylation;GO:0030049~muscle filament sliding;GO:0030240~skeletal muscle thin filament assembly;GO:0030241~skeletal muscle myosin thick filament assembly;GO:0035995~detection of mus…
>sp|Q8WZ42|TITIN_HUMAN Titin OS=Homo sapiens OX=9606 GN=TTN PE=1 SV=4Y(24007)	Q8WZ42	TTN	Y(24007)	IKNYIVEKREATRKSYAAVVTNCHKNSWKID	Peptide10377		-0.13828	-0.171718	0.106238	0.0438398	-0.0561988		0	-0.211553	-0.171519	0.100884	0.0932349		0.170781	-0.105966	-0.150943	-0.121019	-0.044419		-0.262962	-0.129575	-0.129441	0.166759	0.0725088			-0.0970877	0.588968		-0.0288006	0.926588		0.105231	0.576313		0.0738969	0.73996		0	0	0	0		GO:0002576~platelet degranulation;GO:0003300~cardiac muscle hypertrophy;GO:0006936~muscle contraction;GO:0006941~striated muscle contraction;GO:0007076~mitotic chromosome condensation;GO:0018108~peptidyl-tyrosine phosphorylation;GO:0030049~muscle filament sliding;GO:0030240~skeletal muscle thin filament assembly;GO:0030241~skeletal muscle myosin thick filament assembly;GO:0035995~detection of mus…
>sp|Q8WZ42|TITIN_HUMAN Titin OS=Homo sapiens OX=9606 GN=TTN PE=1 SV=4T(24012)	Q8WZ42	TTN	T(24012)	VEKREATRKSYAAVVTNCHKNSWKIDQLQEG	Peptide10378		0.19143	0.116428	0.0654459	0.183989	0.106492		0	0.0711352	0.0598363	0.284181	0.180285		-0.0158288	0.0488641	0.269932	0.0557222	-0.138607		-0.218723	0.0142218	0.0390093	0.375827	0.0973405			0.0734428	0.700877		0.119336	0.598152		0.23571	0.199577		0.0721582	0.753979		0	0	0	0		GO:0002576~platelet degranulation;GO:0003300~cardiac muscle hypertrophy;GO:0006936~muscle contraction;GO:0006941~striated muscle contraction;GO:0007076~mitotic chromosome condensation;GO:0018108~peptidyl-tyrosine phosphorylation;GO:0030049~muscle filament sliding;GO:0030240~skeletal muscle thin filament assembly;GO:0030241~skeletal muscle myosin thick filament assembly;GO:0035995~detection of mus…
>sp|P20929|NEBU_HUMAN Nebulin OS=Homo sapiens OX=9606 GN=NEB PE=1 SV=5S(4625)	P20929	NEB	S(4625)	GCYVWDTPQILHAKKSYDLQSQLQYTAAGKE	Peptide10379		-0.786497	-1.09322	0.321081	-0.821382	-0.62315		0						-1.11003	-0.89563	0.574395	-0.865583	-0.518695									-0.0461615	0.900464		1.396	0.00399278		0.104783	0.763018		0.377343	0.274964		0	0.582431	0	0		GO:0007517~muscle organ development;GO:0007525~somatic muscle development;GO:0030049~muscle filament sliding;GO:0030832~regulation of actin filament length
>sp|O60516|4EBP3_HUMAN Eukaryotic >tr|anslation initiation factor 4E-binding protein 3 OS=Homo sapiens OX=9606 GN=EIF4EBP3 PE=1 SV=1T(32)	O60516	EIF4EBP3	T(32)	PDCYSTTPGGTLYATTPGGTRIIYDRKFLLE	Peptide1038		-0.508192	-0.412469	-0.039919	-0.348478	-0.0269499		0	-0.447501	-0.166249	-0.0318175	-0.310271		-0.266807	-0.197244	-0.000296288	-0.154624	-0.113511		0.00536154	-0.330457	0.0970433	-0.577765	-0.060404			-0.154508	0.497288		0.165054	0.560506		-0.0857617	0.741444		0.0646254	0.833286		0	0.484587	0	0		GO:0045947~negative regulation of translatiol initiation
>sp|Q8WZ42|TITIN_HUMAN Titin OS=Homo sapiens OX=9606 GN=TTN PE=1 SV=4S(21842)	Q8WZ42	TTN	S(21842)	TNYIVEKREATRKSYSTATTKCHKCTYKVTG	Peptide10380		-0.710352	-0.647058	0.294225	0.162773	0.27103		0	-0.702952	-0.0468806	0.300143	0.110246		-0.0272121	-0.468122	-0.142829	0.48757	0.376421		0.203915	-0.302659	-0.0227765	-0.197264	0.399946			-0.396785	0.166316		0.153847	0.712393		0.321717	0.312293		0.422823	0.192655		0.346589	0	0	0		GO:0002576~platelet degranulation;GO:0003300~cardiac muscle hypertrophy;GO:0006936~muscle contraction;GO:0006941~striated muscle contraction;GO:0007076~mitotic chromosome condensation;GO:0018108~peptidyl-tyrosine phosphorylation;GO:0030049~muscle filament sliding;GO:0030240~skeletal muscle thin filament assembly;GO:0030241~skeletal muscle myosin thick filament assembly;GO:0035995~detection of mus…
>sp|Q96JM3|CHAP1_HUMAN Chromosome alignment-maintaining phosphoprotein 1 OS=Homo sapiens OX=9606 GN=CHAMP1 PE=1 SV=2S(405)	Q96JM3	CHAMP1	S(405)	WKSGPPELRKTAPTLSPEHWKAVPPVSPELR	Peptide10381		-0.166081	0.248424	-0.064264	-0.0782897	0.0617602		0	0.119877	-0.00628002	-0.130715	0.0636404		0.00300541	-0.0463205	0.111458	0.0455887	-0.18587		-0.226044	0.214665	0.0574926	-0.12073	0.0662514			0.231441	0.123038		0.121881	0.539405		0.0262435	0.894181		0.0987255	0.606719		0	0.426031	0	0		GO:0031134~sister chromatid biorientation;GO:0034501~protein localization to kinetochore;GO:0035372~protein localization to microtubule;GO:0051315~attachment of mitotic spindle microtubules to kinetochore
>sp|O43707|ACTN4_HUMAN Alpha-actinin-4 OS=Homo sapiens OX=9606 GN=ACTN4 PE=1 SV=2S(62)	O43707	ACTN4	S(62)	AWEKQQRKTFTAWCNSHLRKAGTQIENIDED	Peptide10382		-0.0683355	0.04715	0.0545803	0.11336	0.131615		0	-0.166737	0.254371	0.205322	0.114167		0.129347	-0.106678	0.158491	-0.0909404	-0.00280912		-0.275599	0.0423896	-0.246205	0.271109	0.283409			0.00767812	0.976417		0.108956	0.694924		0.17836	0.408013		0.185242	0.429178		0	0	0.453011	0		GO:0001666~response to hypoxia;GO:0002576~platelet degranulation;GO:0015031~protein transport;GO:0030050~vesicle transport along actin filament;GO:0030335~positive regulation of cell migration;GO:0032417~positive regulation of sodium:proton antiporter activity;GO:0035357~peroxisome proliferator activated receptor sigling pathway;GO:0042981~regulation of apoptotic process;GO:0048384~retinoic acid …
>tr||A0A0A0MTS7|A0A0A0MTS7_HUMAN Titin OS=Homo sapiens OX=9606 GN=TTN PE=1 SV=1S(11956)	A0A0A0MTS7	TTN	S(11956)	IPEGETPIVKRRKTPSPTVPESPREIVPVKE	Peptide10383		-2.30355	-0.88617	-1.00855	-2.08456	-0.911182		0						-0.512478	-0.773823	-0.761211	-2.09188	-0.142592									0.578016	0.525189		0.523131	0.658406		-0.680207	0.477701		0.881126	0.390228		0	0.59912	0	0		GO:0002576~platelet degranulation;GO:0003300~cardiac muscle hypertrophy;GO:0006936~muscle contraction;GO:0006941~striated muscle contraction;GO:0007076~mitotic chromosome condensation;GO:0018108~peptidyl-tyrosine phosphorylation;GO:0030049~muscle filament sliding;GO:0030240~skeletal muscle thin filament assembly;GO:0030241~skeletal muscle myosin thick filament assembly;GO:0035995~detection of mus…
>sp|Q8WZ42|TITIN_HUMAN Titin OS=Homo sapiens OX=9606 GN=TTN PE=1 SV=4S(333)	Q8WZ42	TTN	S(333)	IRSVRSPLLMRKTQASTVATGPEVPPPWKQE	Peptide10384		-0.501757	-0.104771	0.23386	-0.514876	0.454447		0	-0.297344	0.2207	-0.00814065	0.0378814		-0.158966	0.0184909	0.304245	0.0934869	-0.0295883		0.202927	0.0405724	0.236357	-0.611255	0.273588			0.0286861	0.938102		0.363239	0.243985		-0.145747	0.651752		0.298531	0.351213		0	0.508268	0	0		GO:0002576~platelet degranulation;GO:0003300~cardiac muscle hypertrophy;GO:0006936~muscle contraction;GO:0006941~striated muscle contraction;GO:0007076~mitotic chromosome condensation;GO:0018108~peptidyl-tyrosine phosphorylation;GO:0030049~muscle filament sliding;GO:0030240~skeletal muscle thin filament assembly;GO:0030241~skeletal muscle myosin thick filament assembly;GO:0035995~detection of mus…
>sp|Q8WZ42|TITIN_HUMAN Titin OS=Homo sapiens OX=9606 GN=TTN PE=1 SV=4T(334)	Q8WZ42	TTN	T(334)	RSVRSPLLMRKTQASTVATGPEVPPPWKQEG	Peptide10385		-1.01181	-0.829263	-0.908583	-0.819699	-0.676938		0						-0.501115	-0.742114	-0.513078	-0.568263	-0.616822									-0.0292249	0.951502		0.0456331	0.946607		0.0624823	0.891127		0.109583	0.830539		0	0	0.632268	0		GO:0002576~platelet degranulation;GO:0003300~cardiac muscle hypertrophy;GO:0006936~muscle contraction;GO:0006941~striated muscle contraction;GO:0007076~mitotic chromosome condensation;GO:0018108~peptidyl-tyrosine phosphorylation;GO:0030049~muscle filament sliding;GO:0030240~skeletal muscle thin filament assembly;GO:0030241~skeletal muscle myosin thick filament assembly;GO:0035995~detection of mus…
>sp|Q8WZ42|TITIN_HUMAN Titin OS=Homo sapiens OX=9606 GN=TTN PE=1 SV=4S(4681)	Q8WZ42	TTN	S(4681)	FVKKVDPSYLMLPGESARLHCKLKGSPVIQV	Peptide10386		0.032814	-0.24297	0.0225876	0.122821	-0.029557		0	-0.0265444	-0.011742	0.138837	-0.0816763		-0.177738	0.431399	0.0316201	-0.27091	0.0227895		0.0599367	-0.119989	-0.0343256	0.0720271	-0.0144404			0.0317207	0.904321		0.0232819	0.95212		0.0369405	0.887472		-0.00447414	0.990471		0	0	0	0		GO:0002576~platelet degranulation;GO:0003300~cardiac muscle hypertrophy;GO:0006936~muscle contraction;GO:0006941~striated muscle contraction;GO:0007076~mitotic chromosome condensation;GO:0018108~peptidyl-tyrosine phosphorylation;GO:0030049~muscle filament sliding;GO:0030240~skeletal muscle thin filament assembly;GO:0030241~skeletal muscle myosin thick filament assembly;GO:0035995~detection of mus…
>sp|Q5VTT5|MYOM3_HUMAN Myomesin-3 OS=Homo sapiens OX=9606 GN=MYOM3 PE=1 SV=1T(642)	Q5VTT5	MYOM3	T(642)	DPELLGYYIYSRKVGTSEWQTVNNKPIQGTR	Peptide10387		-0.192927	-0.0800889	-0.321773	0.102119	-0.221067		0	-0.241588	-0.106324	0.0421718	-0.293646		-0.203123	-0.248464	0.139275	0.107487	-0.579612		-0.142612	-0.119449	-0.208652	0.0822878	-0.274103			-0.0377321	0.858578		0.0102971	0.975188		0.218182	0.240266		-0.207441	0.279776		0	0	0.309169	0
>sp|Q5VTT5|MYOM3_HUMAN Myomesin-3 OS=Homo sapiens OX=9606 GN=MYOM3 PE=1 SV=1T(656)	Q5VTT5	MYOM3	T(656)	GTSEWQTVNNKPIQGTRFTVPGLRTGKEYEF	Peptide10388		0.0050413	0.0314823	-0.109446	0.428677	-0.143266		0	0.0200506	-0.238222	0.46451	-0.163531		-0.604237	-0.266022	0.356228	0.485806	0.0434952		0.310911	-0.0536555	-0.0539614	0.194178	-0.178461			0.00503516	0.988086		0.0607211	0.899095		0.465364	0.105658		-0.0383691	0.926556		0	0	0.32405	0
>tr||A0A0A0MTS7|A0A0A0MTS7_HUMAN Titin OS=Homo sapiens OX=9606 GN=TTN PE=1 SV=1S(12416)	A0A0A0MTS7	TTN	S(12416)	VPEAPKEVVLEKKVPSAPPKKPEVPPVKVPE	Peptide10389		-1.37381	1.05934	0.51943	-0.709502	0.612714		0	0.187447	0.432139	-0.0194573	0.207632		-0.299422	0.455786	0.900163	-0.257382	0.294988		-0.161585	1.1334	0.301866	-0.627663	0.496598			1.1677	0.00809126		0.997103	0.0357479		0.0552029	0.922378		0.861687	0.0767172		0	0.555568	0	0		GO:0002576~platelet degranulation;GO:0003300~cardiac muscle hypertrophy;GO:0006936~muscle contraction;GO:0006941~striated muscle contraction;GO:0007076~mitotic chromosome condensation;GO:0018108~peptidyl-tyrosine phosphorylation;GO:0030049~muscle filament sliding;GO:0030240~skeletal muscle thin filament assembly;GO:0030241~skeletal muscle myosin thick filament assembly;GO:0035995~detection of mus…
>sp|O60516|4EBP3_HUMAN Eukaryotic >tr|anslation initiation factor 4E-binding protein 3 OS=Homo sapiens OX=9606 GN=EIF4EBP3 PE=1 SV=1T(23)	O60516	EIF4EBP3	T(23)	PIPGGRDQLPDCYSTTPGGTLYATTPGGTRI	Peptide1039		-0.327404	0.000502659	-0.0312766	0.00580856	0.155985		0	-0.0560641	-0.111147	0.213757	0.0180284		0.0159269	0.0706865	-0.20295	0.194345	0.190766		-0.0394921	-0.0657984	0.0548751	0.0190898	0.140211			0.0750739	0.66209		0.0151175	0.958008		0.195993	0.245712		0.21399	0.216189		0	0	0.517333	0		GO:0045947~negative regulation of translatiol initiation
>sp|P05114|HMGN1_HUMAN Non-histone chromosomal protein HMG-14 OS=Homo sapiens OX=9606 GN=HMGN1 PE=1 SV=3S(7)	P05114	HMGN1	S(7)	_________MPKRKVSSAEGAAKEEPKRRSA	Peptide10390		-0.675177	1.48912	1.47308	-0.344215	0.405038		0	0.874437	1.10895	0.707321	0.168813		-0.593982	0.3241	1.63857	0.286932	0.467883		-0.0536888	0.873351	0.358377	-0.202146	1.02182			1.22096	0.0128026		1.47546	0.0084911		0.442685	0.416216		0.8466	0.122182		0	0.613419	0	0		elongation;GO:0000720~pyrimidine dimer repair by nucleotide-excision repair;GO:0006283~transcription-coupled nucleotide-excision repair;GO:0006325~chromatin organization;GO:0006357~regulation of transcription from R polymerase II promoter;GO:0010224~response to UV-B;GO:0010225~response to UV-C;GO:0032786~positive regulation of D-templated transcription;GO:0040034~regulation of development;GO:0048…
>tr||A0A0A0MTS7|A0A0A0MTS7_HUMAN Titin OS=Homo sapiens OX=9606 GN=TTN PE=1 SV=1S(12108)	A0A0A0MTS7	TTN	S(12108)	KVHEAPKEIIPEKKVSVVPPKKPEVPPVKVP	Peptide10391		-0.925699	0.831274	0.210442	0.706906	1.45359		0	0.473367	1.29053	-1.42737	1.81291		1.27706	1.0191	-0.199639	0.37762	1.73735		0.155184	1.54002	1.20207	0.815265	0.719117			0.839304	0.314014		0.499216	0.663639		-0.00853049	0.99266		1.3041	0.148541		0	0.384504	0	0		GO:0002576~platelet degranulation;GO:0003300~cardiac muscle hypertrophy;GO:0006936~muscle contraction;GO:0006941~striated muscle contraction;GO:0007076~mitotic chromosome condensation;GO:0018108~peptidyl-tyrosine phosphorylation;GO:0030049~muscle filament sliding;GO:0030240~skeletal muscle thin filament assembly;GO:0030241~skeletal muscle myosin thick filament assembly;GO:0035995~detection of mus…
>sp|Q8TDC0|MYOZ3_HUMAN Myozenin-3 OS=Homo sapiens OX=9606 GN=MYOZ3 PE=1 SV=2T(83)	Q8TDC0	MYOZ3	T(83)	ASQRAMLAGSARRKVTGTAESGTVANGPE	Peptide10392		-0.395542	-1.27054	0.95156	-0.156445	-0.842597		0	-0.803483	0.0826182	-0.11181	-0.713325		-0.7667	-0.68932	0.574582	-0.535885	-0.384276		0.198572	-1.0512	-0.236035	-0.893065	0.0314137			-0.712718	0.0995174		0.584099	0.243222		-0.183384	0.73247		-0.236279	0.679533		0.353271	0	0	0		GO:0030239~myofibril assembly
>sp|Q8WZ42|TITIN_HUMAN Titin OS=Homo sapiens OX=9606 GN=TTN PE=1 SV=4T(4601)	Q8WZ42	TTN	T(4601)	KKVHLECQVDEDRKVTVTWSKDGQKLPPGKD	Peptide10393		-0.363997	-0.164894	0.0814135	-0.0573914	-0.208775		0	-0.336718	0.0579746	-0.018014	-0.215722		-0.0632321	-0.146257	0.0758169	-0.106356	-0.288278		-0.0255664	-0.169871	-0.308772	0.0385025	-0.0751595			-0.0912364	0.627061		0.089807	0.714163		0.0773841	0.705743		-0.0837848	0.709644		0	0	0	0		GO:0002576~platelet degranulation;GO:0003300~cardiac muscle hypertrophy;GO:0006936~muscle contraction;GO:0006941~striated muscle contraction;GO:0007076~mitotic chromosome condensation;GO:0018108~peptidyl-tyrosine phosphorylation;GO:0030049~muscle filament sliding;GO:0030240~skeletal muscle thin filament assembly;GO:0030241~skeletal muscle myosin thick filament assembly;GO:0035995~detection of mus…
>sp|Q8WZ42|TITIN_HUMAN Titin OS=Homo sapiens OX=9606 GN=TTN PE=1 SV=4S(13350)	Q8WZ42	TTN	S(13350)	KDGAEIKKGKKYDIISKGAVRILVINKCLLD	Peptide10394		0.50505	0.260924	0.198867	0.0580348	0.0344321		0	0.287872	0.0137896	-0.308712	0.430272		-0.0138429	-0.272755	0.322713	0.412873	-0.110164		0.328803	0.033016	0.207328	0.290113	-0.14602			-0.127738	0.696702		-0.0193281	0.972793		-0.0919254	0.795818		-0.152873	0.681125		0	0	0	0.676176		GO:0002576~platelet degranulation;GO:0003300~cardiac muscle hypertrophy;GO:0006936~muscle contraction;GO:0006941~striated muscle contraction;GO:0007076~mitotic chromosome condensation;GO:0018108~peptidyl-tyrosine phosphorylation;GO:0030049~muscle filament sliding;GO:0030240~skeletal muscle thin filament assembly;GO:0030241~skeletal muscle myosin thick filament assembly;GO:0035995~detection of mus…
>sp|Q9H987|SYP2L_HUMAN Syptopodin 2-like protein OS=Homo sapiens OX=9606 GN=SYNPO2L PE=2 SV=3S(95)	Q9H987	SYNPO2L	S(95)	LVLTVQRLADEGPVQSPSPHELQVLSPLSPL	Peptide10395		-0.249839	-0.223565	-0.167531	0.0543353	0.099176		0	-0.16731	-0.0348468	-0.109797	-0.00516894		-0.207187	0.0364861	0.0163402	-0.118223	0.113853		0.0138187	-0.111705	0.0119741	-0.164422	0.0748141			-0.00572152	0.976417		0.0672861	0.758385		0.0262753	0.889231		0.18147	0.275632		0	0.448186	0	0		GO:0032233~positive regulation of actin filament bundle assembly
>sp|Q9H987|SYP2L_HUMAN Syptopodin 2-like protein OS=Homo sapiens OX=9606 GN=SYNPO2L PE=2 SV=3S(111)	Q9H987	SYNPO2L	S(111)	PSPHELQVLSPLSPLSPEPPGAPVPQPLQPG	Peptide10396		-1.19024	-0.0968163	-0.0187112	-1.47232	-0.789001		0						-0.886567	-0.760343	-0.014685	-1.05843	-0.0769897									0.609824	0.245763		1.02171	0.0991079		-0.226972	0.706415		0.605408	0.31557		0	0.725842	0	0		GO:0032233~positive regulation of actin filament bundle assembly
>sp|Q9UIG0|BAZ1B_HUMAN Tyrosine-protein kise BAZ1B OS=Homo sapiens OX=9606 GN=BAZ1B PE=1 SV=2S(1468)	Q9UIG0	BAZ1B	S(1468)	KRKKFPDRLAEDEGDSEPEAVGQSRGRRQKK	Peptide10397		-0.0732687	-0.1531	-0.0983226	0.0452916	0.112263		0	-0.0871747	-0.0819252	-0.305066	0.135528		0.146528	0.146017	-0.140351	0.0590657	-0.0787277		0.195124	0.354039	0.0563572	-0.199924	-0.116836			-0.00215048	0.993083		-0.133156	0.618031		-0.167254	0.439766		-0.0540392	0.849122		0	0	0	0		D-templated;epigenetic;GO:0003007~heart morphogenesis;GO:0006302~double-strand break repair;GO:0006333~chromatin assembly or disassembly;GO:0006351~transcription;GO:0006355~regulation of transcription;GO:0006974~cellular response to D damage stimulus;GO:0016572~histone phosphorylation;GO:0018108~peptidyl-tyrosine phosphorylation;GO:0045815~positive regulation of gene expression;GO:0048096~chromat…
>tr||A6NGQ3|A6NGQ3_HUMAN Obscurin OS=Homo sapiens OX=9606 GN=OBSCN PE=1 SV=5S(5585)	A6NGQ3	OBSCN	S(5585)	TVRLAEPPKPVPPQPSAPESRQVAAGEDVSL	Peptide10398		-0.303892	-0.378709	0.10071	-0.453762	-0.903643		0	-0.410858	0.1247	-0.473505	-0.943937		-0.619584	-0.54356	0.524887	-0.721145	-0.712894		-0.0546708	-0.604183	-0.16763	-0.677855	-0.562515			-0.239791	0.342643		0.390204	0.153303		-0.33703	0.21406		-0.53621	0.0510309		0	0	0	0.304629		GO:0006468~protein phosphorylation;GO:0007275~multicellular organism development;GO:0035023~regulation of Rho protein sigl transduction;GO:0036309~protein localization to M-band;GO:0043065~positive regulation of apoptotic process;GO:0043547~positive regulation of GTPase activity;GO:0045214~sarcomere organization;GO:0051056~regulation of small GTPase mediated sigl transduction
>sp|P13533|MYH6_HUMAN Myosin-6 OS=Homo sapiens OX=9606 GN=MYH6 PE=1 SV=5S(1712)	P13533	MYH6	S(1712)	TERSRKLAEQELIETSERVQLLHSQNTSLIN	Peptide10399		-1.09074	-0.127476	-0.149893	0.0265565	-0.534179		0	-0.270298	-0.989584	-0.80043	0.0406285		-0.249798	-0.25838	-0.296853	-0.317305	-0.2819		-0.136383	0.299898	-0.471563	-0.357679	-0.355855			0.280165	0.497645		-0.107744	0.870719		0.00701495	0.988898		0.0864029	0.881184		0	0	0.519068	0		GO:0001701~in utero embryonic development;GO:0002026~regulation of the force of heart contraction;GO:0002027~regulation of heart rate;GO:0006470~protein dephosphorylation;GO:0006936~muscle contraction;GO:0006941~striated muscle contraction;GO:0007512~adult heart development;GO:0007522~visceral muscle development;GO:0008016~regulation of heart contraction;GO:0008217~regulation of blood pressure;GO…
>sp|Q8N5J2|MINY1_HUMAN Ubiquitin carboxyl-termil hydrolase MINDY-1 OS=Homo sapiens OX=9606 GN=MINDY1 PE=1 SV=2S(103)	Q8N5J2	MINDY1	S(103)	VETIRACSMPQELPQSPRTRQPEPDFYCVKW	Peptide104		-0.510549	0.00931975	-0.175962	-0.743002	-0.391155		0	-0.201086	-0.486304	-0.585394	-0.288218		-0.666385	-0.272827	0.33038	-0.820958	-0.559524		-0.243461	-0.471262	-0.345965	-0.557041	-0.241953			0.121135	0.69979		0.185636	0.620343		-0.3215	0.285484		-0.015114	0.973667		0	0.526349	0	0		GO:0071108~protein K48-linked deubiquitition
>sp|O14983|AT2A1_HUMAN Sarcoplasmic/endoplasmic reticulum calcium ATPase 1 OS=Homo sapiens OX=9606 GN=ATP2A1 PE=1 SV=1T(242)	O14983	ATP2A1	T(242)	GVGTEIGKIRDQMAATEQDKTPLQQKLDEFG	Peptide1040		-0.815274	-0.830293	-1.24745	-0.916374	-0.317657		0						-0.268003	-1.0833	-0.684569	-0.821322	-0.664971									-0.415158	0.361006		-0.424369	0.433223		-0.327209	0.501835		0.0503248	0.941823		0	0	0.390582	0		GO:0006816~calcium ion transport;GO:0006942~regulation of striated muscle contraction;GO:0008637~apoptotic mitochondrial changes;GO:0031448~positive regulation of fast-twitch skeletal muscle fiber contraction;GO:0032470~positive regulation of endoplasmic reticulum calcium ion concentration;GO:0032471~negative regulation of endoplasmic reticulum calcium ion concentration;GO:0034220~ion transmembra…
>sp|Q15773|MLF2_HUMAN Myeloid leukemia factor 2 OS=Homo sapiens OX=9606 GN=MLF2 PE=1 SV=1S(238)	Q15773	MLF2	S(238)	RAEGPPRLAIQGPEDSPSRQSRRYDW_____	Peptide10400		-0.400034	-0.408038	-0.573343	-1.24473	-0.293431		0	-0.606759	-0.714831	-0.583996	-0.579965		-0.32755	-0.72566	-0.340138	-1.02443	-0.419003		-0.366093	-0.656906	-0.489121	-1.32263	-0.158888			-0.325922	0.177668		-0.255939	0.384031		-0.770527	0.00971844		-0.0894024	0.798443		0	0	0	0.326184		D-templated;GO:0006355~regulation of transcription;GO:0006952~defense response
>sp|Q96JM3|CHAP1_HUMAN Chromosome alignment-maintaining phosphoprotein 1 OS=Homo sapiens OX=9606 GN=CHAMP1 PE=1 SV=2S(204)	Q96JM3	CHAMP1	S(204)	KSVPVCESQKLAPVPSPEPQKPAPVSPESVK	Peptide10401		-0.621037	-0.359371	-0.473851	-0.658865	-0.801462		0						-0.217737	-0.676199	-0.562316	-0.770549	-0.47995									-0.0983979	0.804091		-0.0986967	0.856888		-0.29532	0.430834		-0.221319	0.599563		0	0.529354	0	0		GO:0031134~sister chromatid biorientation;GO:0034501~protein localization to kinetochore;GO:0035372~protein localization to microtubule;GO:0051315~attachment of mitotic spindle microtubules to kinetochore
>sp|Q96JM3|CHAP1_HUMAN Chromosome alignment-maintaining phosphoprotein 1 OS=Homo sapiens OX=9606 GN=CHAMP1 PE=1 SV=2S(204);S(214)	Q96JM3	CHAMP1	S(204);S(214)	KSVPVCESQKLAPVPSPEPQKPAPVSPESVK;LAPVPSPEPQKPAPVSPESVKATLSNPKPQK	Peptide10402		-1.00692	-0.873506	-0.873514	-0.853089	-0.991215		0						-0.232164	-1.07705	-0.93812	-0.757565	-0.166021									-0.355737	0.529673		-0.286277	0.701404		-0.185788	0.770525		0.0409215	0.961502		0	0	0.496415	0		GO:0031134~sister chromatid biorientation;GO:0034501~protein localization to kinetochore;GO:0035372~protein localization to microtubule;GO:0051315~attachment of mitotic spindle microtubules to kinetochore
>sp|P11055|MYH3_HUMAN Myosin-3 OS=Homo sapiens OX=9606 GN=MYH3 PE=1 SV=3S(1066)	P11055	MYH3	S(1066)	RNKRKLEGDLKLAQESILDLENDKQQLDERL	Peptide10403		-1.04404	-0.300119	-0.478001	-0.806761	-0.7243		0						-0.461651	-0.842453	-0.395768	-0.938588	-0.287201									0.18156	0.718744		0.315962	0.596336		-0.119828	0.823813		0.247095	0.658839		0	0.72756	0	0		GO:0003009~skeletal muscle contraction;GO:0006470~protein dephosphorylation;GO:0007517~muscle organ development;GO:0030048~actin filament-based movement;GO:0030049~muscle filament sliding;GO:0030326~embryonic limb morphogenesis;GO:0045214~sarcomere organization;GO:0046034~ATP metabolic process;GO:0060325~face morphogenesis
>sp|Q9UKX2|MYH2_HUMAN Myosin-2 OS=Homo sapiens OX=9606 GN=MYH2 PE=1 SV=1S(1071)	Q9UKX2	MYH2	S(1071)	RAKRKLEGDLKLAQESIMDIENEKQQLDEKL	Peptide10404		-0.562991	-0.277377	-0.0612057	-0.0133724	-0.0915641		0	-0.408035	-0.0632623	0.100377	-0.248281		-0.121994	-0.300291	-0.225477	0.0651647	0.135026		0.0476221	-0.32004	-0.381017	-0.136926	0.149849			-0.167095	0.452663		-0.0233997	0.953009		0.163152	0.489928		0.145598	0.578371		0	0	0.366325	0		GO:0001778~plasma membrane repair;GO:0006936~muscle contraction;GO:0014823~response to activity;GO:0030049~muscle filament sliding;GO:0038096~Fc-gamma receptor sigling pathway involved in phagocytosis
>sp|P12882|MYH1_HUMAN Myosin-1 OS=Homo sapiens OX=9606 GN=MYH1 PE=1 SV=3S(1069)	P12882	MYH1	S(1069)	RAKRKLEGDLKLAQESTMDIENDKQQLDEKL	Peptide10405		0.196775	-0.0860201	-0.788081	-1.05694	-0.542249		0						-0.445719	-0.489292	-0.0880913	-0.803664	-0.767574									-0.163184	0.78125		-0.313614	0.652213		-0.805831	0.172806		-0.530439	0.381867		0	0	0	0.538874		GO:0006936~muscle contraction
>sp|P12882|MYH1_HUMAN Myosin-1 OS=Homo sapiens OX=9606 GN=MYH1 PE=1 SV=3T(1070)	P12882	MYH1	T(1070)	AKRKLEGDLKLAQESTMDIENDKQQLDEKLK	Peptide10406		0.151746	-0.614287	-0.638806	-1.35133	-0.762088		0						-0.362206	-0.776058	-0.163402	-1.01464	-0.806828									-0.589943	0.152874		-0.295874	0.575676		-1.07775	0.041863		-0.679228	0.150365		0	0	0	0.653189		GO:0006936~muscle contraction
>sp|Q9Y623|MYH4_HUMAN Myosin-4 OS=Homo sapiens OX=9606 GN=MYH4 PE=2 SV=2T(790)	Q9Y623	MYH4	T(790)	GTLEEMRDEKLAQLITRTQAICRGFLMRVEF	Peptide10407		-0.162073	-0.5403	-0.0412046	-0.367959	-0.135986		0	0.516491	-0.0799585	0.434925	-0.477547		-0.695772	-0.674268	-0.0736555	-0.135996	-0.531115		-2.62015	-3.13657	1.40637	-0.567726	1.30513			-0.0891621	0.952395		1.17239	0.375259		0.71031	0.5753		0.90962	0.494799		0	0.48153	0	0		GO:0006936~muscle contraction;GO:0014823~response to activity;GO:0030048~actin filament-based movement;GO:0030049~muscle filament sliding;GO:0046034~ATP metabolic process
>sp|P05387|RLA2_HUMAN 60S acidic ribosomal protein P2 OS=Homo sapiens OX=9606 GN=RPLP2 PE=1 SV=1S(79)	P05387	RPLP2	S(79)	SVPAGGAVAVSAAPGSAAPAAGSAPAAAEEK	Peptide10408		-1.00391	-0.53817	-0.729269	-1.2697	-0.598615		0						-0.691283	-0.967084	-0.376555	-0.711524	-0.104759									0.0949701	0.868448		0.294685	0.643985		-0.143013	0.798998		0.49591	0.373395		0	0.671203	0	0		GO:0000184~nuclear-transcribed mR catabolic process;GO:0002181~cytoplasmic translation;GO:0006364~rR processing;GO:0006412~translation;GO:0006413~translatiol initiation;GO:0006414~translatiol elongation;GO:0006614~SRP-dependent cotranslatiol protein targeting to membrane;GO:0019083~viral transcription;nonsense-mediated decay
>sp|P06753|TPM3_HUMAN >tr|opomyosin alpha-3 chain OS=Homo sapiens OX=9606 GN=TPM3 PE=1 SV=2T(109)	P06753	TPM3	T(109)	QLVEEELDRAQERLATALQKLEEAEKAADES	Peptide10409		-0.552954	-0.374386	0.0984683	-0.0721037	-0.1144		0	-0.71997	-0.0996814	0.500276	-0.337652		-0.183164	-0.202295	-0.0789723	-0.104267	0.136572		0.362338	-0.177998	-0.789165	0.052524	0.0296432			-0.275217	0.451121		-0.123893	0.824336		0.187552	0.642928		0.0219858	0.969243		0.43818	0	0	0		GO:0006928~movement of cell or subcellular component;GO:0006936~muscle contraction;GO:0007015~actin filament organization;GO:0030049~muscle filament sliding
>sp|P46020|KPB1_HUMAN Phosphorylase b kise regulatory subunit alpha; skeletal muscle isoform OS=Homo sapiens OX=9606 GN=PHKA1 PE=1 SV=2S(758)	P46020	PHKA1	S(758)	QVPSVRVEIHLPRDQSGEVDFKALVLQLKET	Peptide1041		-1.31705	3.36675	3.0488	2.07941	0.90725		0	2.26649	0.175029	3.50754	1.89599		-0.0494504	2.45553	1.98805	2.02679	1.04192		-0.41522	3.60845	0.133934	3.07874	1.58869			3.36974	0.000754117		1.78188	0.0722524		3.11855	0.00858511		1.80389	0.0740095		0	0	0.547069	0		GO:0005977~glycogen metabolic process;GO:0005980~glycogen catabolic process;GO:0006091~generation of precursor metabolites and energy;GO:0006468~protein phosphorylation
>sp|Q92614|MY18A_HUMAN Unconventiol myosin-XVIIIa OS=Homo sapiens OX=9606 GN=MYO18A PE=1 SV=3S(1640)	Q92614	MYO18A	S(1640)	VLREKRELEGKLATLSDQVNRRDFESEKRLR	Peptide10410		0.120506	-0.177651	-0.160698	-0.116411	0.18967		0	-0.304289	-0.0891461	-0.0463731	0.125048		0.00685479	-0.210663	0.125088	-0.0964725	-0.0347443		0.100142	0.101501	0.0474664	-0.123739	-0.123322			-0.204651	0.20363		-0.0761981	0.753031		-0.152625	0.392789		-0.0177127	0.948115		0.445258	0	0	0		GO:0006259~D metabolic process;GO:0007030~Golgi organization;GO:0016477~cell migration;GO:0031032~actomyosin structure organization;GO:0043030~regulation of macrophage activation;GO:0043066~negative regulation of apoptotic process;GO:0048194~Golgi vesicle budding;GO:0050714~positive regulation of protein secretion;GO:0090161~Golgi ribbon formation;GO:0090164~asymmetric Golgi ribbon formation;GO:1…
>sp|P54296|MYOM2_HUMAN Myomesin-2 OS=Homo sapiens OX=9606 GN=MYOM2 PE=1 SV=2T(145)	P54296	MYOM2	T(145)	AIQQMMEDKLAWERHTFEERISRAPEILVRL	Peptide10411		-0.433348	-0.59679	-0.733663	-0.811649	-0.46945		0						-0.500145	-0.521168	-0.457255	-0.868217	-0.15433									-0.0922325	0.779364		-0.128713	0.755271		-0.373186	0.248552		0.154856	0.666093		0	0.474332	0	0		GO:0006936~muscle contraction
>sp|Q8WZ42|TITIN_HUMAN Titin OS=Homo sapiens OX=9606 GN=TTN PE=1 SV=4S(22534)	Q8WZ42	TTN	S(22534)	VQKRETSRLAWTNVASEVQVTKLKVTKLLKG	Peptide10412		0.0826445	-0.200907	0.083671	-0.0123851	0.0729215		0	-0.15054	-0.0979469	-0.0256752	0.14994		-0.25416	0.00777645	0.290725	-0.0593142	-0.159824		0.198723	-0.100745	-0.0643039	0.0134464	-0.027663			-0.117906	0.536167		0.0462343	0.88109		-0.027784	0.902342		0.00204161	0.994789		0	0	0	0		GO:0002576~platelet degranulation;GO:0003300~cardiac muscle hypertrophy;GO:0006936~muscle contraction;GO:0006941~striated muscle contraction;GO:0007076~mitotic chromosome condensation;GO:0018108~peptidyl-tyrosine phosphorylation;GO:0030049~muscle filament sliding;GO:0030240~skeletal muscle thin filament assembly;GO:0030241~skeletal muscle myosin thick filament assembly;GO:0035995~detection of mus…
>sp|Q8WZ42|TITIN_HUMAN Titin OS=Homo sapiens OX=9606 GN=TTN PE=1 SV=4T(22539)	Q8WZ42	TTN	T(22539)	TSRLAWTNVASEVQVTKLKVTKLLKGNEYIF	Peptide10413		-0.490011	-0.930252	-0.808515	-0.955852	-0.612048		0						-0.635241	-0.971361	-0.404609	-1.05623	-0.445524									-0.388181	0.19916		-0.0439362	0.937394		-0.443415	0.19296		0.0338397	0.941823		0	0.541458	0	0		GO:0002576~platelet degranulation;GO:0003300~cardiac muscle hypertrophy;GO:0006936~muscle contraction;GO:0006941~striated muscle contraction;GO:0007076~mitotic chromosome condensation;GO:0018108~peptidyl-tyrosine phosphorylation;GO:0030049~muscle filament sliding;GO:0030240~skeletal muscle thin filament assembly;GO:0030241~skeletal muscle myosin thick filament assembly;GO:0035995~detection of mus…
>sp|Q13523|PRP4B_HUMAN Serine/threonine-protein kise PRP4 homolog OS=Homo sapiens OX=9606 GN=PRPF4B PE=1 SV=3S(837)	Q13523	PRPF4B	S(837)	LVNESKTILKLCDFGSASHVADNDITPYLVS	Peptide10414		-1.06208	-0.88615	-0.704959	-0.886215	-0.639812		0						-0.408274	-0.819649	-0.473906	-1.01254	-0.584714									-0.117724	0.783724		0.145743	0.796045		-0.214204	0.611032		0.122913	0.811269		0	0.794447	0	0		GO:0000398~mR splicing;GO:0006468~protein phosphorylation;GO:0008380~R splicing;via spliceosome
>sp|Q8WZ42|TITIN_HUMAN Titin OS=Homo sapiens OX=9606 GN=TTN PE=1 SV=4T(32565)	Q8WZ42	TTN	T(32565)	VAILYVKDITKLDDGTYRCKVVNDYGEDSSY	Peptide10415		-1.13742	-0.818974	-0.322414	-0.597465	-0.477346		0						-0.522355	-0.509437	-0.394962	-0.755525	-0.26915									0.165682	0.696032		0.471199	0.295959		0.153392	0.733469		0.456639	0.306527		0	0.606035	0	0		GO:0002576~platelet degranulation;GO:0003300~cardiac muscle hypertrophy;GO:0006936~muscle contraction;GO:0006941~striated muscle contraction;GO:0007076~mitotic chromosome condensation;GO:0018108~peptidyl-tyrosine phosphorylation;GO:0030049~muscle filament sliding;GO:0030240~skeletal muscle thin filament assembly;GO:0030241~skeletal muscle myosin thick filament assembly;GO:0035995~detection of mus…
>sp|P05976|MYL1_HUMAN Myosin light chain 1/3; skeletal muscle isoform OS=Homo sapiens OX=9606 GN=MYL1 PE=2 SV=3S(41)	P05976	MYL1	S(41)	PAPAPAKPKEEKIDLSAIKIEFSKEQQDEFK	Peptide10416		-0.892267	0.770202	0.0154879	-0.139296	-0.075894		0	0.390864	0.34462	0.671591	-0.560844		-0.040472	0.00205217	0.133708	-0.181134	0.0325187		-1.43393	0.0134201	0.290346	-0.22304	0.612986			0.885801	0.0685784		0.787707	0.156153		0.623697	0.256991		0.593858	0.297029		0	0	0.545406	0		GO:0006936~muscle contraction;GO:0030049~muscle filament sliding;GO:0060048~cardiac muscle contraction
>sp|Q9BZ67|FRMD8_HUMAN FERM domain-containing protein 8 OS=Homo sapiens OX=9606 GN=FRMD8 PE=1 SV=1S(199)	Q9BZ67	FRMD8	S(199)	QPGRPAACDLREKLDSFLPAHLCKRGQSLFA	Peptide10417		-0.412911	-0.39197	-0.793686	-1.36265	-0.762349		0						-0.584933	-0.244923	-0.424117	-1.64123	-0.477727									0.180475	0.613295		-0.109979	0.834884		-1.00302	0.027431		-0.121116	0.79263		0	0.343581	0	0
>tr||A0A0C4DFM5|A0A0C4DFM5_HUMAN Myotilin; isoform CRA_b OS=Homo sapiens OX=9606 GN=MYOT PE=1 SV=1T(441)	A0A0C4DFM5	MYOT	T(441)	VNEAGVTTCNTRLDVTARPNQTLPAPKQLRV	Peptide10418		-1.10642	-0.538021	-0.631704	-0.75532	-0.870454		0						-0.430926	-0.60324	-0.456007	-1.13664	-0.624066									0.198042	0.66209		0.224817	0.696268		-0.177308	0.71521		0.0214127	0.974217		0	0.582596	0	0		GO:0006936~muscle contraction
>sp|Q8WZ42|TITIN_HUMAN Titin OS=Homo sapiens OX=9606 GN=TTN PE=1 SV=4S(22413)	Q8WZ42	TTN	S(22413)	VILKAGEAFRLEADVSGRPPPTMEWSKDGKE	Peptide10419		0.398438	0.176153	0.0365187	-0.191097	-0.181842		0	0.125405	-0.213467	-0.156565	0.0576011		-0.114368	-0.2601	0.2708	0.0243786	-0.431117		0.0910716	0.0115814	-0.0346297	0.0197726	-0.295709			-0.0805257	0.765484		-0.0789798	0.831591		-0.169663	0.505263		-0.306552	0.23211		0	0	0	0.627559		GO:0002576~platelet degranulation;GO:0003300~cardiac muscle hypertrophy;GO:0006936~muscle contraction;GO:0006941~striated muscle contraction;GO:0007076~mitotic chromosome condensation;GO:0018108~peptidyl-tyrosine phosphorylation;GO:0030049~muscle filament sliding;GO:0030240~skeletal muscle thin filament assembly;GO:0030241~skeletal muscle myosin thick filament assembly;GO:0035995~detection of mus…
>sp|P12883|MYH7_HUMAN Myosin-7 OS=Homo sapiens OX=9606 GN=MYH7 PE=1 SV=5S(210)	P12883	MYH7	S(210)	FAVIAAIGDRSKKDQSPGKGTLEDQIIQANP	Peptide1042		0.198181	0.0565935	-0.199154	-0.340886	0.056797		0	-0.260709	-0.396758	-0.360375	0.209338		0.195441	-0.347771	0.189444	-0.508963	-0.411536		-0.118539	0.970727	-0.354307	-0.607852	-0.196679			0.0359392	0.941891		-0.258965	0.603481		-0.52329	0.193881		-0.154291	0.76173		0	0	0	0.486888		GO:0002026~regulation of the force of heart contraction;GO:0002027~regulation of heart rate;GO:0003009~skeletal muscle contraction;GO:0006936~muscle contraction;GO:0006941~striated muscle contraction;GO:0007512~adult heart development;GO:0014728~regulation of the force of skeletal muscle contraction;GO:0014883~transition between fast and slow fiber;GO:0014898~cardiac muscle hypertrophy in respons…
>sp|P13533|MYH6_HUMAN Myosin-6 OS=Homo sapiens OX=9606 GN=MYH6 PE=1 SV=5T(939)	P13533	MYH6	T(939)	MNERLEDEEEMELTAKKRKLEDECSELKK	Peptide10420		-0.96341	-0.394408	-0.354576	-0.578204	-0.917012		0	-0.518498	-0.524152	-1.07824	-0.830238		-0.441002	-0.52712	-0.354629	-0.757197	-0.259345		0.195565	-0.365507	-0.466326	-0.962433	-0.718028			-0.149171	0.682861		-0.122709	0.810573		-0.541806	0.124427		-0.378944	0.303468		0	0	0	0.333122		GO:0001701~in utero embryonic development;GO:0002026~regulation of the force of heart contraction;GO:0002027~regulation of heart rate;GO:0006470~protein dephosphorylation;GO:0006936~muscle contraction;GO:0006941~striated muscle contraction;GO:0007512~adult heart development;GO:0007522~visceral muscle development;GO:0008016~regulation of heart contraction;GO:0008217~regulation of blood pressure;GO…
>sp|Q9Y623|MYH4_HUMAN Myosin-4 OS=Homo sapiens OX=9606 GN=MYH4 PE=2 SV=2T(1161)	Q9Y623	MYH4	T(1161)	ELEEISERLEEAGGATSAQIEMNKKREAEFQ	Peptide10421		-0.209956	-0.122399	0.129983	0.0399082	0.0404959		0	-0.157454	0.18658	0.0117775	-0.0477517		0.126245	-0.121037	-0.0638811	0.228067	0.0923943		0.0797072	-0.0491112	0.136838	-0.0454791	0.0437975			-0.111499	0.478826		0.0983811	0.627712		0.0595695	0.741482		0.0332352	0.880574		0	0	0	0		GO:0006936~muscle contraction;GO:0014823~response to activity;GO:0030048~actin filament-based movement;GO:0030049~muscle filament sliding;GO:0046034~ATP metabolic process
>sp|Q9Y623|MYH4_HUMAN Myosin-4 OS=Homo sapiens OX=9606 GN=MYH4 PE=2 SV=2S(1162)	Q9Y623	MYH4	S(1162)	LEEISERLEEAGGATSAQIEMNKKREAEFQK	Peptide10422		-0.186619	0.0402062	0.214549	-0.0766843	0.0911611		0	-0.0506058	0.0965475	-0.0817999	0.0698554		0.22401	-0.174541	-0.107336	0.386439	0.130568		0.208439	0.157669	0.216314	-0.14088	0.00309752			-0.0682754	0.781205		0.043561	0.908525		-0.0396889	0.879359		0.0122129	0.971848		0	0	0	0		GO:0006936~muscle contraction;GO:0014823~response to activity;GO:0030048~actin filament-based movement;GO:0030049~muscle filament sliding;GO:0046034~ATP metabolic process
>sp|P13533|MYH6_HUMAN Myosin-6 OS=Homo sapiens OX=9606 GN=MYH6 PE=1 SV=5S(1160)	P13533	MYH6	S(1160)	LEEISERLEEAGGATSVQIEMNKKREAEFQK	Peptide10423		-1.40993	-0.71378	-0.411093	-0.974971	-0.654134		0						-0.411454	-0.261806	-0.627694	-1.28238	-0.557397									0.422898	0.452939		0.391298	0.583125		-0.217982	0.732268		0.304926	0.650179		0	0.614086	0	0		GO:0001701~in utero embryonic development;GO:0002026~regulation of the force of heart contraction;GO:0002027~regulation of heart rate;GO:0006470~protein dephosphorylation;GO:0006936~muscle contraction;GO:0006941~striated muscle contraction;GO:0007512~adult heart development;GO:0007522~visceral muscle development;GO:0008016~regulation of heart contraction;GO:0008217~regulation of blood pressure;GO…
>sp|Q08043|ACTN3_HUMAN Alpha-actinin-3 OS=Homo sapiens OX=9606 GN=ACTN3 PE=1 SV=2S(712)	Q08043	ACTN3	S(712)	TNIDRLEGDHQLLQESLVFDNKHTVYSMEHI	Peptide10424		-0.846554	-0.499234	-0.607705	-1.11484	-0.640719		0						-0.518848	-1.12013	-0.292064	-1.08851	-0.277278									-0.12698	0.794615		0.232817	0.690043		-0.418974	0.367793		0.223703	0.674543		0	0.696474	0	0		GO:0006936~muscle contraction;GO:0014728~regulation of the force of skeletal muscle contraction;GO:0014732~skeletal muscle atrophy;GO:0014883~transition between fast and slow fiber;GO:0014894~response to denervation involved in regulation of muscle adaptation;GO:0030049~muscle filament sliding;GO:0031448~positive regulation of fast-twitch skeletal muscle fiber contraction;GO:0042981~regulation of…
>sp|Q00872|MYPC1_HUMAN Myosin-binding protein C; slow-type OS=Homo sapiens OX=9606 GN=MYBPC1 PE=1 SV=2S(550)	Q00872	MYBPC1	S(550)	VTVIAGNKLRLEIPISGEPPPKAMWSRGDKA	Peptide10425		0.026062	0.0728566	0.0925006	0.198974	-0.211534		0	0.188202	-0.0241059	-0.140794	-0.0270419		-0.0816527	-0.130711	0.0925301	0.0492498	0.0127855		-0.065138	0.140316	0.070526	-0.0941545	-0.0247307			0.0978482	0.552293		0.0880449	0.683277		0.033501	0.861567		-0.0324481	0.887021		0	0	0	0		GO:0007155~cell adhesion;GO:0030049~muscle filament sliding;GO:1903955~positive regulation of protein targeting to mitochondrion
>sp|P13533|MYH6_HUMAN Myosin-6 OS=Homo sapiens OX=9606 GN=MYH6 PE=1 SV=5T(1234)	P13533	MYH6	T(1234)	LEKEKSEFKLELDDVTSNMEQIIKAKANLEK	Peptide10426		-1.07556	-0.0342997	0.218988	0.151544	-0.199224		0	-0.129089	-0.468959	-0.784346	0.231596		-0.157611	0.27625	-0.0273443	0.224661	-0.125415		0.516107	0.559953	0.170113	-0.108972	-0.514982			0.347469	0.489569		0.152465	0.845512		0.049987	0.934795		0.0272592	0.972498		0	0	0.428283	0		GO:0001701~in utero embryonic development;GO:0002026~regulation of the force of heart contraction;GO:0002027~regulation of heart rate;GO:0006470~protein dephosphorylation;GO:0006936~muscle contraction;GO:0006941~striated muscle contraction;GO:0007512~adult heart development;GO:0007522~visceral muscle development;GO:0008016~regulation of heart contraction;GO:0008217~regulation of blood pressure;GO…
>sp|P13533|MYH6_HUMAN Myosin-6 OS=Homo sapiens OX=9606 GN=MYH6 PE=1 SV=5S(1235)	P13533	MYH6	S(1235)	EKEKSEFKLELDDVTSNMEQIIKAKANLEKV	Peptide10427		-1.26277	-0.200002	-0.0161349	0.177156	-0.345275		0	-0.267521	-0.906285	-0.619075	0.157897		-0.278023	0.0871167	-0.217959	-0.260175	-0.273339		-0.177808	0.39293	-0.397162	-0.278029	-0.158967			0.432782	0.303769		0.0452653	0.95374		0.18462	0.711373		0.274729	0.598688		0	0	0.579696	0		GO:0001701~in utero embryonic development;GO:0002026~regulation of the force of heart contraction;GO:0002027~regulation of heart rate;GO:0006470~protein dephosphorylation;GO:0006936~muscle contraction;GO:0006941~striated muscle contraction;GO:0007512~adult heart development;GO:0007522~visceral muscle development;GO:0008016~regulation of heart contraction;GO:0008217~regulation of blood pressure;GO…
>sp|Q8WZ42|TITIN_HUMAN Titin OS=Homo sapiens OX=9606 GN=TTN PE=1 SV=4S(25032)	Q8WZ42	TTN	S(25032)	AGKYILKLENSSGSKSAFVTVKVLDTPGPPQ	Peptide10428		0.524573	0.117082	-0.910465	-1.48443	-0.849811		0						-0.306957	-1.1871	-0.550658	-0.817617	-0.781286									-0.643818	0.417908		-0.839369	0.362495		-1.25983	0.156595		-0.924356	0.300517		0	0	0	0.682321		GO:0002576~platelet degranulation;GO:0003300~cardiac muscle hypertrophy;GO:0006936~muscle contraction;GO:0006941~striated muscle contraction;GO:0007076~mitotic chromosome condensation;GO:0018108~peptidyl-tyrosine phosphorylation;GO:0030049~muscle filament sliding;GO:0030240~skeletal muscle thin filament assembly;GO:0030241~skeletal muscle myosin thick filament assembly;GO:0035995~detection of mus…
>sp|Q8WZ42|TITIN_HUMAN Titin OS=Homo sapiens OX=9606 GN=TTN PE=1 SV=4S(5235)	Q8WZ42	TTN	S(5235)	LFVKEPATFVEKLEPSQLLKKGDATQLACKV	Peptide10429		-0.72705	-0.738291	-0.629366	-0.881104	-0.85068		0						-0.624431	-0.709531	-0.318556	-0.659975	-0.665904									-0.0481707	0.891758		0.201779	0.595984		-0.0947991	0.780866		-0.0825516	0.834842		0	0.590197	0	0		GO:0002576~platelet degranulation;GO:0003300~cardiac muscle hypertrophy;GO:0006936~muscle contraction;GO:0006941~striated muscle contraction;GO:0007076~mitotic chromosome condensation;GO:0018108~peptidyl-tyrosine phosphorylation;GO:0030049~muscle filament sliding;GO:0030240~skeletal muscle thin filament assembly;GO:0030241~skeletal muscle myosin thick filament assembly;GO:0035995~detection of mus…
>sp|P09601|HMOX1_HUMAN Heme oxygese 1 OS=Homo sapiens OX=9606 GN=HMOX1 PE=1 SV=1S(229)	P09601	HMOX1	S(229)	FEELQELLTHDTKDQSPSRAPGLRQRASNKV	Peptide1043		-1.06589	-0.722411	-0.53447	-0.839932	-0.304945		0						-0.190129	-0.702143	-0.694778	-0.540057	0.0316433									-0.0842692	0.887154		0.0133834	0.987898		-0.0619872	0.916459		0.491356	0.385279		0	0	0.457044	0		GO:0001525~angiogenesis;GO:0001666~response to hypoxia;GO:0001935~endothelial cell proliferation;GO:0002246~wound healing involved in inflammatory response;GO:0002686~negative regulation of leukocyte migration;GO:0006788~heme oxidation;GO:0006879~cellular iron ion homeostasis;GO:0006979~response to oxidative stress;GO:0007264~small GTPase mediated sigl transduction;GO:0007588~excretion;GO:0008217…
>sp|Q03252|LMNB2_HUMAN Lamin-B2 OS=Homo sapiens OX=9606 GN=LMNB2 PE=1 SV=4S(316)	Q03252	LMNB2	S(316)	SAAREELKEARMRLESLSYQLSGLQKQASAA	Peptide10430		-0.768383	-0.730805	-0.331348	-0.858178	-0.640552		0						-0.479694	-0.402073	-0.210704	-1.01416	-0.179527									0.0575993	0.896759		0.353012	0.418979		-0.312133	0.425318		0.213999	0.625542		0	0.741642	0	0
>sp|Q9Y623|MYH4_HUMAN Myosin-4 OS=Homo sapiens OX=9606 GN=MYH4 PE=2 SV=2S(1739)	Q9Y623	MYH4	S(1739)	NTSLINTKKKLETDISQIQGEMEDIVQEARN	Peptide10431		-0.197596	-0.0978875	0.0757323	-0.0589359	-0.0435489		0	-0.148256	-0.0712881	-0.0720008	0.0644339		-0.00117818	0.649604	0.174061	-0.884743	-0.248514		-0.278093	0.350299	-0.306278	0.076602	-0.0374711			0.307656	0.356262		0.0872733	0.874668		-0.115553	0.770525		0.0529417	0.916457		0	0.372711	0	0		GO:0006936~muscle contraction;GO:0014823~response to activity;GO:0030048~actin filament-based movement;GO:0030049~muscle filament sliding;GO:0046034~ATP metabolic process
>sp|Q8WZ42|TITIN_HUMAN Titin OS=Homo sapiens OX=9606 GN=TTN PE=1 SV=4T(30574)	Q8WZ42	TTN	T(30574)	SEVPLVPAKLEVVDVTKSTVTLAWEKPLYDG	Peptide10432		-0.437713	-0.20638	-0.0305707	0.11168	0.183551		0	-0.318175	-0.0186032	-0.056947	0.104246		-0.180748	-0.0418164	0.23057	0.0532752	0.0211711		0.0674552	0.123334	0.174353	-0.106735	-0.0230973			0.0269921	0.915838		0.226689	0.319005		0.13807	0.532461		0.209219	0.358155		0	0.519945	0	0		GO:0002576~platelet degranulation;GO:0003300~cardiac muscle hypertrophy;GO:0006936~muscle contraction;GO:0006941~striated muscle contraction;GO:0007076~mitotic chromosome condensation;GO:0018108~peptidyl-tyrosine phosphorylation;GO:0030049~muscle filament sliding;GO:0030240~skeletal muscle thin filament assembly;GO:0030241~skeletal muscle myosin thick filament assembly;GO:0035995~detection of mus…
>sp|Q8WZ42|TITIN_HUMAN Titin OS=Homo sapiens OX=9606 GN=TTN PE=1 SV=4S(9389)	Q8WZ42	TTN	S(9389)	KAAVDGRLFFVSEPQSIRVVEKTTATFIAKV	Peptide10433		0.345174	-0.0236951	0.0130347	-0.402048	0.073604		0	-0.0795774	-0.11919	0.115618	0.0159051		-0.0443907	0.00999341	0.142087	-0.363654	-0.137985		-0.013777	-0.12586	-0.0496351	-0.0931654	-0.0666822			-0.126536	0.536877		-0.0751774	0.802639		-0.257564	0.220711		-0.100541	0.685826		0	0	0	0.668615		GO:0002576~platelet degranulation;GO:0003300~cardiac muscle hypertrophy;GO:0006936~muscle contraction;GO:0006941~striated muscle contraction;GO:0007076~mitotic chromosome condensation;GO:0018108~peptidyl-tyrosine phosphorylation;GO:0030049~muscle filament sliding;GO:0030240~skeletal muscle thin filament assembly;GO:0030241~skeletal muscle myosin thick filament assembly;GO:0035995~detection of mus…
>sp|Q8WZ42|TITIN_HUMAN Titin OS=Homo sapiens OX=9606 GN=TTN PE=1 SV=4S(9385)	Q8WZ42	TTN	S(9385)	PATKKAAVDGRLFFVSEPQSIRVVEKTTATF	Peptide10434		0.284723	0.17957	-0.0873883	-0.0227033	-0.0210281		0	0.126232	-0.0537619	-0.00697746	0.0739288		0.0416357	-0.0394149	0.0734033	-0.161461	-0.025949		-0.100511	0.154903	-0.0790413	0.0802609	-0.0479017			0.0488608	0.784065		-0.0931588	0.654679		-0.084182	0.628299		-0.0616993	0.767623		0	0	0	0		GO:0002576~platelet degranulation;GO:0003300~cardiac muscle hypertrophy;GO:0006936~muscle contraction;GO:0006941~striated muscle contraction;GO:0007076~mitotic chromosome condensation;GO:0018108~peptidyl-tyrosine phosphorylation;GO:0030049~muscle filament sliding;GO:0030240~skeletal muscle thin filament assembly;GO:0030241~skeletal muscle myosin thick filament assembly;GO:0035995~detection of mus…
>sp|Q8WZ42|TITIN_HUMAN Titin OS=Homo sapiens OX=9606 GN=TTN PE=1 SV=4T(2881)	Q8WZ42	TTN	T(2881)	AVVGQLECKAKLFVETLHITKTMKNIEVPET	Peptide10435		-0.00680481	0.132671	0.625122	-0.203436	-0.160661		0	-0.209366	-0.086941	-0.216711	0.358731		0.0292562	-0.703406	0.638036	0.237488	-0.655383		0.00220566	0.0863312	-0.0520136	0.145161	-0.134676			-0.179607	0.658269		0.274887	0.572468		-0.0155385	0.973381		-0.154162	0.759162		0.348738	0	0	0		GO:0002576~platelet degranulation;GO:0003300~cardiac muscle hypertrophy;GO:0006936~muscle contraction;GO:0006941~striated muscle contraction;GO:0007076~mitotic chromosome condensation;GO:0018108~peptidyl-tyrosine phosphorylation;GO:0030049~muscle filament sliding;GO:0030240~skeletal muscle thin filament assembly;GO:0030241~skeletal muscle myosin thick filament assembly;GO:0035995~detection of mus…
>sp|Q8WZ42|TITIN_HUMAN Titin OS=Homo sapiens OX=9606 GN=TTN PE=1 SV=4S(31480)	Q8WZ42	TTN	S(31480)	EMKDVTTKLGEAAQLSCQIVGRPLPDIKWYR	Peptide10436		-0.0020382	0.102422	-0.032387	-0.195664	-0.0836641		0	-0.123011	0.107612	0.162705	-0.1247		-0.0499259	-0.00158854	0.15834	-0.342655	-0.178357		-0.235583	-0.329037	-0.211143	0.323374	-0.038229			-0.0159168	0.957353		0.0774922	0.831258		0.0588267	0.832932		-0.0343506	0.921111		0	0	0	0		GO:0002576~platelet degranulation;GO:0003300~cardiac muscle hypertrophy;GO:0006936~muscle contraction;GO:0006941~striated muscle contraction;GO:0007076~mitotic chromosome condensation;GO:0018108~peptidyl-tyrosine phosphorylation;GO:0030049~muscle filament sliding;GO:0030240~skeletal muscle thin filament assembly;GO:0030241~skeletal muscle myosin thick filament assembly;GO:0035995~detection of mus…
>sp|Q8WZ42|TITIN_HUMAN Titin OS=Homo sapiens OX=9606 GN=TTN PE=1 SV=4S(15394)	Q8WZ42	TTN	S(15394)	ADAGIYTITLENKLGSATASINVKVIGLPGP	Peptide10437		0.35634	0.0721273	-0.22655	-0.134516	-0.121534		0	0.0429922	-0.0232021	-0.344176	-0.00528006		-0.194669	-0.311958	0.246246	-0.0339394	-0.429761		0.0963006	-0.115841	-0.233273	-0.0567234	-0.161949			-0.142663	0.565287		-0.123688	0.704722		-0.206832	0.410358		-0.244124	0.360408		0	0	0	0.716139		GO:0002576~platelet degranulation;GO:0003300~cardiac muscle hypertrophy;GO:0006936~muscle contraction;GO:0006941~striated muscle contraction;GO:0007076~mitotic chromosome condensation;GO:0018108~peptidyl-tyrosine phosphorylation;GO:0030049~muscle filament sliding;GO:0030240~skeletal muscle thin filament assembly;GO:0030241~skeletal muscle myosin thick filament assembly;GO:0035995~detection of mus…
>sp|Q8WZ42|TITIN_HUMAN Titin OS=Homo sapiens OX=9606 GN=TTN PE=1 SV=4T(15396)	Q8WZ42	TTN	T(15396)	AGIYTITLENKLGSATASINVKVIGLPGPCK	Peptide10438		0.56458	0.0830897	-0.182573	-0.131337	0.0418668		0	0.0895154	-0.150218	-0.250374	0.202213		-0.324241	-0.342016	0.456375	0.0591269	-0.377036		0.197206	-0.0816776	-0.00767452	-0.0358512	-0.190645			-0.172158	0.598395		-0.0804088	0.874834		-0.198995	0.559515		-0.190286	0.611851		0	0	0	0.740947		GO:0002576~platelet degranulation;GO:0003300~cardiac muscle hypertrophy;GO:0006936~muscle contraction;GO:0006941~striated muscle contraction;GO:0007076~mitotic chromosome condensation;GO:0018108~peptidyl-tyrosine phosphorylation;GO:0030049~muscle filament sliding;GO:0030240~skeletal muscle thin filament assembly;GO:0030241~skeletal muscle myosin thick filament assembly;GO:0035995~detection of mus…
>sp|D6RIA3|CD054_HUMAN Uncharacterized protein C4orf54 OS=Homo sapiens OX=9606 GN=C4orf54 PE=2 SV=1S(1035)	D6RIA3	C4orf54	S(1035)	AVIRPKAPEIKIRLGSVQQPSSDFNIAKLLT	Peptide10439		-0.00289368	0.0387012	0.086092	0.10923	-0.189065		0	0.19346	-0.148278	-0.175003	-0.0065448		0.221621	0.24575	-0.268164	-0.042844	-0.0838698		-0.0174099	0.385308	-0.0777679	-0.104537	-0.0848318			0.165476	0.325333		-0.152359	0.459123		-0.103618	0.584235		-0.141407	0.476507		0	0	0	0.389766		GO:0045149~acetoin metabolic process
>tr||A0A0D9SG04|A0A0D9SG04_HUMAN Cordon-bleu protein-like 1 OS=Homo sapiens OX=9606 GN=COBLL1 PE=1 SV=2S(322)	A0A0D9SG04	COBLL1	S(322)	FSFFQRSKKKRDQTASAPATPLVNKHRPTFT	Peptide1044		-0.814764	-0.820657	-0.817168	-0.938563	-0.422051		0						-0.604191	-0.82555	-0.304662	-0.756569	-0.419874									-0.113626	0.765135		0.148563	0.755908		-0.138089	0.720784		0.288515	0.465968		0	0.639761	0	0		GO:0030041~actin filament polymerization;GO:0051639~actin filament network formation;GO:0098609~cell-cell adhesion
>sp|Q8WZ42|TITIN_HUMAN Titin OS=Homo sapiens OX=9606 GN=TTN PE=1 SV=4S(27314)	Q8WZ42	TTN	S(27314)	TEKPSPPEKLGVTSISKDSVSLTWLKPEHDG	Peptide10440		-0.539319	-0.406969	0.193971	0.301651	-0.0148233		0	-0.203632	-0.128773	0.150385	-0.0470068		-0.255191	-0.00915671	-0.0731498	0.255121	0.157492		0.0745418	-0.169015	-0.0340356	-0.188834	0.261035			-0.0172011	0.955718		0.169495	0.586033		0.309573	0.226681		0.269167	0.312149		0	0	0.480987	0		GO:0002576~platelet degranulation;GO:0003300~cardiac muscle hypertrophy;GO:0006936~muscle contraction;GO:0006941~striated muscle contraction;GO:0007076~mitotic chromosome condensation;GO:0018108~peptidyl-tyrosine phosphorylation;GO:0030049~muscle filament sliding;GO:0030240~skeletal muscle thin filament assembly;GO:0030241~skeletal muscle myosin thick filament assembly;GO:0035995~detection of mus…
>sp|Q8WZ42|TITIN_HUMAN Titin OS=Homo sapiens OX=9606 GN=TTN PE=1 SV=4T(27311)	Q8WZ42	TTN	T(27311)	VKITEKPSPPEKLGVTSISKDSVSLTWLKPE	Peptide10441		0.17605	0.421955	0.217046	0.145516	-0.240484		0	0.62937	0.0848489	0.0139863	-0.129204		-0.200195	0.113556	0.215692	0.307129	-0.177618		-0.0369936	0.199003	0.127836	-0.11002	0.0613456			0.356256	0.0659271		0.17664	0.485497		0.104437	0.654284		-0.106205	0.68055		0	0	0.323657	0		GO:0002576~platelet degranulation;GO:0003300~cardiac muscle hypertrophy;GO:0006936~muscle contraction;GO:0006941~striated muscle contraction;GO:0007076~mitotic chromosome condensation;GO:0018108~peptidyl-tyrosine phosphorylation;GO:0030049~muscle filament sliding;GO:0030240~skeletal muscle thin filament assembly;GO:0030241~skeletal muscle myosin thick filament assembly;GO:0035995~detection of mus…
>sp|Q702N8|XIRP1_HUMAN Xin actin-binding repeat-containing protein 1 OS=Homo sapiens OX=9606 GN=XIRP1 PE=1 SV=1S(498)	Q702N8	XIRP1	S(498)	VYAMQDSKGRLHALTSVSREQIVGGDVQGYR	Peptide10442		0.24829	2.04174	0.710956	0.285977	0.740911		0	1.76785	0.954894	0.37522	0.754779		-0.202658	1.01721	1.60798	0.265364	-0.132863		-0.73014	2.16527	0.42004	-0.0761623	1.12113			1.91914	0.000518424		1.09459	0.0396715		0.383726	0.486804		0.792117	0.144604		0	0.401081	0	0		GO:0007507~heart development;GO:0030036~actin cytoskeleton organization
>sp|Q8WZ42|TITIN_HUMAN Titin OS=Homo sapiens OX=9606 GN=TTN PE=1 SV=4T(29985)	Q8WZ42	TTN	T(29985)	PPKAELDARLHGDLVTIRAGSDLVLDAAVGG	Peptide10443		0.373481	0.144628	-0.000533596	-0.112769	-0.243893		0	0.430183	-0.247622	0.10381	-0.219776		-0.0667391	-0.0164019	-0.179156	0.105165	-0.195885		-0.136202	-0.0889323	0.00759992	-0.291642	0.0138045			0.0747341	0.776883		-0.147563	0.625042		-0.0914939	0.733469		-0.204072	0.438319		0	0	0	0.440364		GO:0002576~platelet degranulation;GO:0003300~cardiac muscle hypertrophy;GO:0006936~muscle contraction;GO:0006941~striated muscle contraction;GO:0007076~mitotic chromosome condensation;GO:0018108~peptidyl-tyrosine phosphorylation;GO:0030049~muscle filament sliding;GO:0030240~skeletal muscle thin filament assembly;GO:0030241~skeletal muscle myosin thick filament assembly;GO:0035995~detection of mus…
>sp|A4UGR9|XIRP2_HUMAN Xin actin-binding repeat-containing protein 2 OS=Homo sapiens OX=9606 GN=XIRP2 PE=1 SV=2S(2474)	A4UGR9	XIRP2	S(2474)	PETVAAKRLHHVLAASEDKDKMKKEVLQSSR	Peptide10444		0.23341	-0.767617	-0.544042	-0.950584	-0.0083849		0	-1.04866	-0.202644	-0.215024	-0.468561		-0.000973138	-0.875218	-0.155912	-0.832482	-0.111291		0.110377	-0.5944	-0.24758	-0.855642	-0.386729			-0.907176	0.000997227		-0.373248	0.190848		-0.799136	0.00971844		-0.329445	0.252881		0	0	0	0.487851		GO:0003281~ventricular septum development;GO:0007507~heart development;GO:0030036~actin cytoskeleton organization;GO:0045216~cell-cell junction organization;GO:0055008~cardiac muscle tissue morphogenesis
>sp|Q8WZ42|TITIN_HUMAN Titin OS=Homo sapiens OX=9606 GN=TTN PE=1 SV=4S(10471)	Q8WZ42	TTN	S(10471)	EEPEEYVVEEKLHIISKRVEAEPAEVTERQE	Peptide10445		-0.167568	-0.753696	-0.720086	-1.06259	-0.3308		0	-1.06622	-0.402446	-0.420077	-0.777078		-0.221741	-1.30174	-0.477905	-0.203199	-0.575157		0.280989	-1.2576	-0.693724	-0.85001	-0.422124			-1.06773	0.000807662		-0.54646	0.0839431		-0.606889	0.0595417		-0.49921	0.121384		0.554718	0	0	0		GO:0002576~platelet degranulation;GO:0003300~cardiac muscle hypertrophy;GO:0006936~muscle contraction;GO:0006941~striated muscle contraction;GO:0007076~mitotic chromosome condensation;GO:0018108~peptidyl-tyrosine phosphorylation;GO:0030049~muscle filament sliding;GO:0030240~skeletal muscle thin filament assembly;GO:0030241~skeletal muscle myosin thick filament assembly;GO:0035995~detection of mus…
>sp|Q8WZ42|TITIN_HUMAN Titin OS=Homo sapiens OX=9606 GN=TTN PE=1 SV=4T(2794)	Q8WZ42	TTN	T(2794)	FRLGRLGASARLHVETVKIIKKPKDVTALEN	Peptide10446		0.00820334	0.18205	-0.0207434	0.10521	0.0752171		0	0.0304514	-0.150696	0.229537	0.10725		-0.0594207	0.0730832	0.190911	0.0793297	-0.0295133		0.00491168	0.301739	0.0911469	0.196388	-0.147175			0.158407	0.297519		0.039231	0.880453		0.164192	0.318442		0.0130211	0.958194		0	0	0	0		GO:0002576~platelet degranulation;GO:0003300~cardiac muscle hypertrophy;GO:0006936~muscle contraction;GO:0006941~striated muscle contraction;GO:0007076~mitotic chromosome condensation;GO:0018108~peptidyl-tyrosine phosphorylation;GO:0030049~muscle filament sliding;GO:0030240~skeletal muscle thin filament assembly;GO:0030241~skeletal muscle myosin thick filament assembly;GO:0035995~detection of mus…
>sp|Q8WZ42|TITIN_HUMAN Titin OS=Homo sapiens OX=9606 GN=TTN PE=1 SV=4S(28357)	Q8WZ42	TTN	S(28357)	VSHKCSSTSFKLIDLSEKTPFFFRVLAENEI	Peptide10447		-0.758347	-0.312859	-0.257521	-0.144215	-0.240353		0	-0.402537	0.0647788	-0.489867	-0.423826		-0.267073	-0.353242	-0.0552994	-0.239813	-0.0957952		-0.114609	-0.295798	-0.125718	-0.558098	-0.043387			-0.0561016	0.84836		0.191568	0.530013		-0.0729907	0.802405		0.0841671	0.80296		0	0.719898	0	0		GO:0002576~platelet degranulation;GO:0003300~cardiac muscle hypertrophy;GO:0006936~muscle contraction;GO:0006941~striated muscle contraction;GO:0007076~mitotic chromosome condensation;GO:0018108~peptidyl-tyrosine phosphorylation;GO:0030049~muscle filament sliding;GO:0030240~skeletal muscle thin filament assembly;GO:0030241~skeletal muscle myosin thick filament assembly;GO:0035995~detection of mus…
>sp|Q8NGB4|OR4S1_HUMAN Olfactory receptor 4S1 OS=Homo sapiens OX=9606 GN=OR4S1 PE=3 SV=1T(286)	Q8NGB4	OR4S1	T(286)	LFNIVMPPLLNPLIYTLRNNDVKMRKLFR	Peptide10448		-0.411813	-0.627121	-0.612708	-1.10628	-0.927448		0						-0.158213	-0.612877	-0.681273	-1.0293	-0.639489									-0.334986	0.231897		-0.361978	0.26287		-0.782775	0.0343513		-0.498456	0.129325		0	0	0	0.52124		GO:0007186~G-protein coupled receptor sigling pathway;GO:0050907~detection of chemical stimulus involved in sensory perception;GO:0050911~detection of chemical stimulus involved in sensory perception of smell
>sp|O60662|KLH41_HUMAN Kelch-like protein 41 OS=Homo sapiens OX=9606 GN=KLHL41 PE=1 SV=2Y(57)	O60662	KLHL41	Y(57)	KSLPCHRLILSACSPYFREYFLSEIDEAKKK	Peptide10449		-0.97407	-1.21833	-0.795189	-1.06734	-0.832714		0						-0.594285	-0.954439	-0.647733	-1.17114	-0.603762									-0.302207	0.357239		0.0627164	0.913303		-0.33506	0.340796		0.0659389	0.885464		0	0.729152	0	0		GO:0006941~striated muscle contraction;GO:0016567~protein ubiquitition;GO:0030239~myofibril assembly;GO:0031275~regulation of lateral pseudopodium assembly;GO:0035914~skeletal muscle cell differentiation;GO:0045214~sarcomere organization;GO:0045661~regulation of myoblast differentiation;GO:0048741~skeletal muscle fiber development;GO:2000291~regulation of myoblast proliferation;GO:2001014~regulat…
>sp|Q9NZQ9|TMOD4_HUMAN >tr|opomodulin-4 OS=Homo sapiens OX=9606 GN=TMOD4 PE=2 SV=1S(58)	Q9NZQ9	TMOD4	S(58)	MLLPAGLRQRDQTKKSPTGPLDREALLQYLE	Peptide1045		0.637137	0.379429	0.310922	0.187669	1.0325		0	0.631455	0.064715	0.48311	0.996391		0.438157	0.485101	0.0568224	0.708573	0.423664		-0.106247	0.679939	0.744464	0.093615	0.738775			0.301719	0.360573		0.0519693	0.933139		0.12598	0.745798		0.55557	0.115573		0	0	0.284129	0		GO:0006936~muscle contraction;GO:0007015~actin filament organization;GO:0030239~myofibril assembly;GO:0051694~pointed-end actin filament capping
>sp|Q9NP98|MYOZ1_HUMAN Myozenin-1 OS=Homo sapiens OX=9606 GN=MYOZ1 PE=1 SV=1S(30)	Q9NP98	MYOZ1	S(30)	SSKLIMELTGGGQESSGLNLGKKISVPRDVM	Peptide10450		-1.11148	-0.677731	-0.969484	-0.761041	-0.752141		0						-0.666625	-1.07251	-0.631311	-0.7898	-0.477622									0.0139309	0.977377		0.0886551	0.892841		0.113632	0.803198		0.274171	0.553909		0	0	0.629385	0		GO:0030239~myofibril assembly
>sp|Q9UKX2|MYH2_HUMAN Myosin-2 OS=Homo sapiens OX=9606 GN=MYH2 PE=1 SV=1T(1280)	Q9UKX2	MYH2	T(1280)	LKSKEEEQQRLINDLTAQRGRLQTESGEFSR	Peptide10451		-0.0036087	-0.23321	-0.167419	-0.214407	-0.156987		0	-0.208856	0.363657	0.330961	-0.730337		-0.249498	-0.17731	0.103487	-0.076909	-0.140534		-0.0592043	-0.460184	0.0685593	-0.417139	-0.0409135			-0.191812	0.503652		0.170149	0.649351		-0.0162959	0.963834		-0.189115	0.57118		0.3394	0	0	0		GO:0001778~plasma membrane repair;GO:0006936~muscle contraction;GO:0014823~response to activity;GO:0030049~muscle filament sliding;GO:0038096~Fc-gamma receptor sigling pathway involved in phagocytosis
>sp|Q8WZ42|TITIN_HUMAN Titin OS=Homo sapiens OX=9606 GN=TTN PE=1 SV=4Y(4641)	Q8WZ42	TTN	Y(4641)	ATLEIPLAKLKDSGTYVCTASNEAGSSSCSA	Peptide10452		-0.0249417	-0.292409	-0.721784	-0.737017	-1.09646		0						-0.636605	-0.743204	-0.583586	-0.744374	-0.523528									-0.187033	0.720239		-0.321912	0.602631		-0.409922	0.419283		-0.479221	0.384084		0	0	0	0.351854		GO:0002576~platelet degranulation;GO:0003300~cardiac muscle hypertrophy;GO:0006936~muscle contraction;GO:0006941~striated muscle contraction;GO:0007076~mitotic chromosome condensation;GO:0018108~peptidyl-tyrosine phosphorylation;GO:0030049~muscle filament sliding;GO:0030240~skeletal muscle thin filament assembly;GO:0030241~skeletal muscle myosin thick filament assembly;GO:0035995~detection of mus…
>sp|Q8WZ42|TITIN_HUMAN Titin OS=Homo sapiens OX=9606 GN=TTN PE=1 SV=4T(4644)	Q8WZ42	TTN	T(4644)	EIPLAKLKDSGTYVCTASNEAGSSSCSATVT	Peptide10453		-0.0992506	-0.76601	-1.33307	-1.49088	-0.0841884		0						-0.591791	-0.96548	-0.441384	-0.743235	-0.836805									-0.520224	0.455292		-0.541706	0.527631		-0.771538	0.300072		-0.114975	0.907065		0	0	0	0.312722		GO:0002576~platelet degranulation;GO:0003300~cardiac muscle hypertrophy;GO:0006936~muscle contraction;GO:0006941~striated muscle contraction;GO:0007076~mitotic chromosome condensation;GO:0018108~peptidyl-tyrosine phosphorylation;GO:0030049~muscle filament sliding;GO:0030240~skeletal muscle thin filament assembly;GO:0030241~skeletal muscle myosin thick filament assembly;GO:0035995~detection of mus…
>sp|Q8WZ42|TITIN_HUMAN Titin OS=Homo sapiens OX=9606 GN=TTN PE=1 SV=4T(13076)	Q8WZ42	TTN	T(13076)	DIHANWKLKGEALLQTPDCEIKEEGKIHSLV	Peptide10454		0.142188	-0.0392566	0.478409	-0.534946	0.30744		0	-0.344203	-0.0275097	0.316357	0.238403		0.3022	-0.162287	0.254175	-0.248109	0.0374996		-0.00149967	0.306588	0.186295	-0.235325	0.0470522			-0.170512	0.565094		0.11212	0.792684		-0.286228	0.338911		0.0468765	0.912867		0	0	0	0.456269		GO:0002576~platelet degranulation;GO:0003300~cardiac muscle hypertrophy;GO:0006936~muscle contraction;GO:0006941~striated muscle contraction;GO:0007076~mitotic chromosome condensation;GO:0018108~peptidyl-tyrosine phosphorylation;GO:0030049~muscle filament sliding;GO:0030240~skeletal muscle thin filament assembly;GO:0030241~skeletal muscle myosin thick filament assembly;GO:0035995~detection of mus…
>sp|Q8WZ42|TITIN_HUMAN Titin OS=Homo sapiens OX=9606 GN=TTN PE=1 SV=4T(12368)	Q8WZ42	TTN	T(12368)	PGQWKLKGELLRPSPTCEIKAEGGKRFLTLH	Peptide10455		0.191532	-0.140102	-0.00166821	0.125839	-0.0366078		0	-0.194317	0.297735	-0.0562649	-0.0186875		0.130748	-0.268351	0.171348	0.138263	-0.236406		-0.00396161	-0.137718	0.0797018	0.211017	-0.123871			-0.264702	0.0656806		0.0571994	0.806084		0.0251341	0.894834		-0.183473	0.275416		0.527404	0	0	0		GO:0002576~platelet degranulation;GO:0003300~cardiac muscle hypertrophy;GO:0006936~muscle contraction;GO:0006941~striated muscle contraction;GO:0007076~mitotic chromosome condensation;GO:0018108~peptidyl-tyrosine phosphorylation;GO:0030049~muscle filament sliding;GO:0030240~skeletal muscle thin filament assembly;GO:0030241~skeletal muscle myosin thick filament assembly;GO:0035995~detection of mus…
>sp|P06753|TPM3_HUMAN >tr|opomyosin alpha-3 chain OS=Homo sapiens OX=9606 GN=TPM3 PE=1 SV=2S(62)	P06753	TPM3	S(62)	MQKKLKGTEDELDKYSEALKDAQEKLELAEK	Peptide10456		-0.0255213	-0.0608637	0.0976073	-0.153269	-0.271195		0	0.0462599	0.243901	0.421729	-0.608125		-0.0231997	-0.276857	-0.290564	0.129784	0.254284		-0.152117	-0.671245	0.0334265	-0.190966	0.18227			-0.190467	0.583388		0.0713022	0.90187		0.102029	0.795487		-0.060482	0.900348		0.451181	0	0	0		GO:0006928~movement of cell or subcellular component;GO:0006936~muscle contraction;GO:0007015~actin filament organization;GO:0030049~muscle filament sliding
>sp|Q8WZ42|TITIN_HUMAN Titin OS=Homo sapiens OX=9606 GN=TTN PE=1 SV=4T(6736)	Q8WZ42	TTN	T(6736)	SDRAVPPSFTRRLKNTGGVLGASCILECKVA	Peptide10457		-0.491496	-0.6372	-0.400791	-0.851599	-0.687325		0						-0.368159	-0.93332	-0.321399	-0.565802	-0.46427									-0.355432	0.246307		0.0687328	0.895318		-0.278873	0.398316		-0.145969	0.704322		0	0.487644	0	0		GO:0002576~platelet degranulation;GO:0003300~cardiac muscle hypertrophy;GO:0006936~muscle contraction;GO:0006941~striated muscle contraction;GO:0007076~mitotic chromosome condensation;GO:0018108~peptidyl-tyrosine phosphorylation;GO:0030049~muscle filament sliding;GO:0030240~skeletal muscle thin filament assembly;GO:0030241~skeletal muscle myosin thick filament assembly;GO:0035995~detection of mus…
>sp|Q8WZ42|TITIN_HUMAN Titin OS=Homo sapiens OX=9606 GN=TTN PE=1 SV=4T(24318)	Q8WZ42	TTN	T(24318)	TVARTTLKVTKLKTGTEYQFRIFAENRYGQS	Peptide10458		0.66527	0.0228429	0.154205	-0.00358763	-0.270295		0	0.364544	0.321763	0.004361	-0.255145		0.0968773	0.257535	0.0351401	0.0271278	-0.402751		0.056426	-0.20053	0.0629583	0.0904062	-0.131463			-0.0935451	0.727702		-0.0611266	0.877627		-0.175066	0.498191		-0.469557	0.0651233		0	0	0	0.597952		GO:0002576~platelet degranulation;GO:0003300~cardiac muscle hypertrophy;GO:0006936~muscle contraction;GO:0006941~striated muscle contraction;GO:0007076~mitotic chromosome condensation;GO:0018108~peptidyl-tyrosine phosphorylation;GO:0030049~muscle filament sliding;GO:0030240~skeletal muscle thin filament assembly;GO:0030241~skeletal muscle myosin thick filament assembly;GO:0035995~detection of mus…
>sp|Q8WZ42|TITIN_HUMAN Titin OS=Homo sapiens OX=9606 GN=TTN PE=1 SV=4T(24316)	Q8WZ42	TTN	T(24316)	SATVARTTLKVTKLKTGTEYQFRIFAENRYG	Peptide10459		-0.151754	-0.139291	-0.172956	-0.25474	-0.286308		0	-0.102807	0.035581	0.18862	-0.569448		-0.292933	-0.176624	-0.10278	-0.0466455	-0.26531		-0.188777	-0.859887	-0.130206	-0.0747371	-0.0262953			-0.161286	0.552686		0.0657758	0.880931		0.111491	0.713115		-0.128474	0.697068		0	0	0.297759	0		GO:0002576~platelet degranulation;GO:0003300~cardiac muscle hypertrophy;GO:0006936~muscle contraction;GO:0006941~striated muscle contraction;GO:0007076~mitotic chromosome condensation;GO:0018108~peptidyl-tyrosine phosphorylation;GO:0030049~muscle filament sliding;GO:0030240~skeletal muscle thin filament assembly;GO:0030241~skeletal muscle myosin thick filament assembly;GO:0035995~detection of mus…
>sp|P02511|CRYAB_HUMAN Alpha-crystallin B chain OS=Homo sapiens OX=9606 GN=CRYAB PE=1 SV=2S(76)	P02511	CRYAB	S(76)	FDTGLSEMRLEKDRFSVNLDVKHFSPEELKV	Peptide1046		-0.341963	0.246403	-0.0654986	0.195724	-0.185587		0	0.22596	0.19799	-0.172438	-0.141237		-0.091953	0.0181118	0.0332621	0.00294791	-0.138906		-0.335929	0.0511653	-0.24947	0.00645898	0.238874			0.327871	0.10295		0.171532	0.514019		0.200635	0.371912		0.135747	0.597897		0	0	0.552242	0		GO:0001666~response to hypoxia;GO:0002088~lens development in camera-type eye;GO:0006457~protein folding;GO:0006936~muscle contraction;GO:0007021~tubulin complex assembly;GO:0007517~muscle organ development;GO:0007568~aging;GO:0010629~negative regulation of gene expression;GO:0010941~regulation of cell death;GO:0030308~negative regulation of cell growth;GO:0031109~microtubule polymerization or de…
>sp|Q8WZ42|TITIN_HUMAN Titin OS=Homo sapiens OX=9606 GN=TTN PE=1 SV=4S(30231)	Q8WZ42	TTN	S(30231)	VNKDYVVYDTRLKVTSLMEGCDYQFRVTAVN	Peptide10460		0.0149143	-0.115898	-0.182227	0.0172849	0.0914954		0	-0.396518	0.242215	0.489775	-0.127009		0.00770925	-0.27638	0.146432	-0.380981	0.0199601		-0.496755	-0.357541	-0.410558	0.308004	0.307872			-0.168051	0.608043		0.0674983	0.900653		0.227053	0.496481		0.191613	0.609251		0	0	0.336952	0		GO:0002576~platelet degranulation;GO:0003300~cardiac muscle hypertrophy;GO:0006936~muscle contraction;GO:0006941~striated muscle contraction;GO:0007076~mitotic chromosome condensation;GO:0018108~peptidyl-tyrosine phosphorylation;GO:0030049~muscle filament sliding;GO:0030240~skeletal muscle thin filament assembly;GO:0030241~skeletal muscle myosin thick filament assembly;GO:0035995~detection of mus…
>sp|Q8WZ42|TITIN_HUMAN Titin OS=Homo sapiens OX=9606 GN=TTN PE=1 SV=4T(30230)	Q8WZ42	TTN	T(30230)	RVNKDYVVYDTRLKVTSLMEGCDYQFRVTAV	Peptide10461		-0.750053	-0.515348	-0.804272	-0.810984	-0.673927		0						-0.49464	-0.957005	-0.450976	-0.705705	-0.50044									-0.11383	0.779764		-0.00527709	0.993932		-0.135998	0.74357		0.0351633	0.950516		0	0.547448	0	0		GO:0002576~platelet degranulation;GO:0003300~cardiac muscle hypertrophy;GO:0006936~muscle contraction;GO:0006941~striated muscle contraction;GO:0007076~mitotic chromosome condensation;GO:0018108~peptidyl-tyrosine phosphorylation;GO:0030049~muscle filament sliding;GO:0030240~skeletal muscle thin filament assembly;GO:0030241~skeletal muscle myosin thick filament assembly;GO:0035995~detection of mus…
>sp|Q8WZ42|TITIN_HUMAN Titin OS=Homo sapiens OX=9606 GN=TTN PE=1 SV=4T(14628)	Q8WZ42	TTN	T(14628)	EAPEIFLDVKLLAGLTVKAGTKIELPATVTG	Peptide10462		0.582622	0.579059	-0.17361	-0.211084	0.321435		0	0.442466	-0.137653	0.264141	0.206967		-0.771322	0.00684712	0.943857	0.421338	-0.506907		0.359695	0.0925868	0.149543	0.0771129	-0.131273			0.237491	0.645528		0.152786	0.843633		0.0951285	0.872322		-0.0701932	0.922957		0	0	0.287437	0		GO:0002576~platelet degranulation;GO:0003300~cardiac muscle hypertrophy;GO:0006936~muscle contraction;GO:0006941~striated muscle contraction;GO:0007076~mitotic chromosome condensation;GO:0018108~peptidyl-tyrosine phosphorylation;GO:0030049~muscle filament sliding;GO:0030240~skeletal muscle thin filament assembly;GO:0030241~skeletal muscle myosin thick filament assembly;GO:0035995~detection of mus…
>sp|P35609|ACTN2_HUMAN Alpha-actinin-2 OS=Homo sapiens OX=9606 GN=ACTN2 PE=1 SV=1T(513)	P35609	ACTN2	T(513)	QKRREALERMEKLLETIDQLHLEFAKRAAPF	Peptide10463		-0.13915	0.541195	0.43536	-0.584357	-0.113517		0	0.0713061	0.330303	0.158859	-0.14093		-0.17929	-0.0447899	0.579105	-0.481086	0.0219971		-0.150001	-0.208989	-0.00368068	0.182034	-0.00546313			0.206791	0.514788		0.452382	0.172425		-0.0640269	0.863851		0.0576321	0.89796		0	0.473909	0	0		GO:0000165~MAPK cascade;GO:0002576~platelet degranulation;GO:0007155~cell adhesion;GO:0030035~microspike assembly;GO:0030049~muscle filament sliding;GO:0042391~regulation of membrane potential;GO:0042981~regulation of apoptotic process;GO:0043267~negative regulation of potassium ion transport;GO:0043268~positive regulation of potassium ion transport;GO:0043547~positive regulation of GTPase activi…
>sp|Q9Y623|MYH4_HUMAN Myosin-4 OS=Homo sapiens OX=9606 GN=MYH4 PE=2 SV=2T(758)	Q9Y623	MYH4	T(758)	KKASEKLLGSIEIDHTQYKFGHTKVFFKAGL	Peptide10464		1.6768	0.975755	0.757832	0.272557	1.09109		0	0.904954	1.03441	0.403512	1.3092		0.920558	0.31863	1.13965	0.546233	0.272286		-0.290849	1.24434	1.79552	0.773006	0.207575			0.284293	0.67145		0.605225	0.402239		-0.0777993	0.919013		0.14341	0.870874		0	0	0	0.589357		GO:0006936~muscle contraction;GO:0014823~response to activity;GO:0030048~actin filament-based movement;GO:0030049~muscle filament sliding;GO:0046034~ATP metabolic process
>sp|Q8WZ42|TITIN_HUMAN Titin OS=Homo sapiens OX=9606 GN=TTN PE=1 SV=4Y(31559)	Q8WZ42	TTN	Y(31559)	SSKLLLQATPQFHPGYPLKEKYYGAVGSTLR	Peptide10465		-0.0377709	0.0309349	0.032752	-0.107485	-0.11998		0	-0.114593	-0.0837147	-0.293604	0.0549868		0.138267	0.00492901	-0.00171781	-0.222753	-0.0288725		0.161342	0.252732	-0.0142312	0.0375689	-0.33412			-0.0219587	0.922986		-0.0821874	0.745766		-0.212028	0.259216		-0.172456	0.390689		0	0	0	0.637013		GO:0002576~platelet degranulation;GO:0003300~cardiac muscle hypertrophy;GO:0006936~muscle contraction;GO:0006941~striated muscle contraction;GO:0007076~mitotic chromosome condensation;GO:0018108~peptidyl-tyrosine phosphorylation;GO:0030049~muscle filament sliding;GO:0030240~skeletal muscle thin filament assembly;GO:0030241~skeletal muscle myosin thick filament assembly;GO:0035995~detection of mus…
>sp|Q8WZ42|TITIN_HUMAN Titin OS=Homo sapiens OX=9606 GN=TTN PE=1 SV=4T(31552)	Q8WZ42	TTN	T(31552)	EVGEVETSSKLLLQATPQFHPGYPLKEKYYG	Peptide10466		-0.446453	-0.00288746	0.246613	0.0118743	0.0720114		0	-0.195941	-0.0212193	0.110553	0.0834808		0.031403	-0.110338	0.0778385	0.209908	0.00226047		0.0185971	0.147482	-0.00952202	-0.00759947	0.0963412			0.0586923	0.78816		0.172541	0.445107		0.180297	0.367375		0.162637	0.456881		0	0	0.514444	0		GO:0002576~platelet degranulation;GO:0003300~cardiac muscle hypertrophy;GO:0006936~muscle contraction;GO:0006941~striated muscle contraction;GO:0007076~mitotic chromosome condensation;GO:0018108~peptidyl-tyrosine phosphorylation;GO:0030049~muscle filament sliding;GO:0030240~skeletal muscle thin filament assembly;GO:0030241~skeletal muscle myosin thick filament assembly;GO:0035995~detection of mus…
>sp|P13533|MYH6_HUMAN Myosin-6 OS=Homo sapiens OX=9606 GN=MYH6 PE=1 SV=5S(750)	P13533	MYH6	S(750)	GQFIDSRKGTEKLLSSLDIDHNQYKFGHTKV	Peptide10467		-0.548909	0.0628863	-0.174063	-0.032397	-0.182645		0	-0.119142	-0.697739	-0.495196	0.221937		-0.196536	-0.130352	-0.0675363	-0.323829	-0.0694583		-0.0817629	0.320175	-0.3092	-0.136211	-0.20708			0.240194	0.376305		-0.105333	0.797867		-0.0401063	0.904519		0.14749	0.661226		0	0	0.453996	0		GO:0001701~in utero embryonic development;GO:0002026~regulation of the force of heart contraction;GO:0002027~regulation of heart rate;GO:0006470~protein dephosphorylation;GO:0006936~muscle contraction;GO:0006941~striated muscle contraction;GO:0007512~adult heart development;GO:0007522~visceral muscle development;GO:0008016~regulation of heart contraction;GO:0008217~regulation of blood pressure;GO…
>sp|P13533|MYH6_HUMAN Myosin-6 OS=Homo sapiens OX=9606 GN=MYH6 PE=1 SV=5S(749)	P13533	MYH6	S(749)	EGQFIDSRKGTEKLLSSLDIDHNQYKFGHTK	Peptide10468		-0.128709	-0.0517637	-0.0926078	-0.126704	-0.31143		0	-0.064555	-0.346523	-0.451581	-0.0312991		-0.12105	-0.0445935	0.0375184	-0.349138	-0.462775		-0.0884603	0.066929	-0.25384	-0.138432	-0.2833			0.0610589	0.770879		-0.0793083	0.766402		-0.181909	0.346811		-0.187647	0.364153		0	0	0	0.342073		GO:0001701~in utero embryonic development;GO:0002026~regulation of the force of heart contraction;GO:0002027~regulation of heart rate;GO:0006470~protein dephosphorylation;GO:0006936~muscle contraction;GO:0006941~striated muscle contraction;GO:0007512~adult heart development;GO:0007522~visceral muscle development;GO:0008016~regulation of heart contraction;GO:0008217~regulation of blood pressure;GO…
>sp|P12883|MYH7_HUMAN Myosin-7 OS=Homo sapiens OX=9606 GN=MYH7 PE=1 SV=5T(619)	P12883	MYH7	T(619)	TVVGLYQKSSLKLLSTLFANYAGADAPIEKG	Peptide10469		-0.0475106	0.288307	-0.503421	-0.328881	0.0220553		0	0.000334411	-0.697057	-0.682941	0.37897		-0.33862	0.0828728	0.404051	-0.491835	-0.865386		-0.126481	0.457293	-0.312279	-0.0617583	-0.448705			0.335355	0.423553		-0.149024	0.816304		-0.263201	0.566278		-0.100114	0.866338		0	0	0.301126	0		GO:0002026~regulation of the force of heart contraction;GO:0002027~regulation of heart rate;GO:0003009~skeletal muscle contraction;GO:0006936~muscle contraction;GO:0006941~striated muscle contraction;GO:0007512~adult heart development;GO:0014728~regulation of the force of skeletal muscle contraction;GO:0014883~transition between fast and slow fiber;GO:0014898~cardiac muscle hypertrophy in respons…
>sp|P02549|SPTA1_HUMAN Spec>tr|in alpha chain; erythrocytic 1 OS=Homo sapiens OX=9606 GN=SPTA1 PE=1 SV=5S(1284)	P02549	SPTA1	S(1284)	EAWEDLQGRTKDRKESLNEAQKFYLFLSKAR	Peptide1047		0.162213	0.674008	1.7636	0.323486	0.327577		0	0.523325	0.905635	1.55061	0.0370591		-0.318489	0.628353	1.41382	1.6035	-0.301585		1.15444	1.10912	0.304817	0.287665	0.337717			0.484162	0.439312		0.847428	0.20575		0.691775	0.286262		-0.149348	0.865993		0	0	0.264111	0		GO:0000165~MAPK cascade;GO:0002260~lymphocyte homeostasis;GO:0006779~porphyrin-containing compound biosynthetic process;GO:0006888~ER to Golgi vesicle-mediated transport;GO:0007009~plasma membrane organization;GO:0007015~actin filament organization;GO:0007411~axon guidance;GO:0008360~regulation of cell shape;GO:0030097~hemopoiesis;GO:0032092~positive regulation of protein binding;GO:0042102~posit…
>sp|A4UGR9|XIRP2_HUMAN Xin actin-binding repeat-containing protein 2 OS=Homo sapiens OX=9606 GN=XIRP2 PE=1 SV=2S(1417)	A4UGR9	XIRP2	S(1417)	IGDVRMAKYKLMNQASPEIQKEEIIRADLRN	Peptide10470		0.0752434	-1.29119	-0.450893	-1.16727	-0.530933		0						-0.526962	-0.869449	-0.173678	-1.25292	-0.350575									-0.854459	0.0527845		-0.0864262	0.903524		-0.984236	0.0575386		-0.214895	0.675705		0	0	0	0.379275		GO:0003281~ventricular septum development;GO:0007507~heart development;GO:0030036~actin cytoskeleton organization;GO:0045216~cell-cell junction organization;GO:0055008~cardiac muscle tissue morphogenesis
>sp|Q702N8|XIRP1_HUMAN Xin actin-binding repeat-containing protein 1 OS=Homo sapiens OX=9606 GN=XIRP1 PE=1 SV=1S(1460)	Q702N8	XIRP1	S(1460)	SGEQPMEGSHQGAPESPDSLQRNQKELQGLL	Peptide10471		-0.715968	-0.730311	-1.6478	-1.6507	-0.108694		0						-0.238903	-0.428897	-1.35532	-1.31764	0.219505									-0.102169	0.828324		-1.02412	0.0417299		-1.00673	0.0514626		0.532841	0.256243		0	0	0.286981	0		GO:0007507~heart development;GO:0030036~actin cytoskeleton organization
>sp|Q8WZ42|TITIN_HUMAN Titin OS=Homo sapiens OX=9606 GN=TTN PE=1 SV=4Y(8804)	Q8WZ42	TTN	Y(8804)	LYIKAPAKFVKRLNDYSIEKGKPLILEGTFT	Peptide10472		0.606769	0.185793	-0.156395	-0.218645	-0.212148		0	0.211038	-0.14707	-0.285383	-0.0163984		-0.12562	-0.261805	0.169708	-0.25327	-0.163532		0.089526	-0.0125569	-0.0938256	-0.0966496	-0.27594			-0.112051	0.668176		-0.199564	0.501071		-0.356156	0.161688		-0.309673	0.239865		0	0	0	0.682273		GO:0002576~platelet degranulation;GO:0003300~cardiac muscle hypertrophy;GO:0006936~muscle contraction;GO:0006941~striated muscle contraction;GO:0007076~mitotic chromosome condensation;GO:0018108~peptidyl-tyrosine phosphorylation;GO:0030049~muscle filament sliding;GO:0030240~skeletal muscle thin filament assembly;GO:0030241~skeletal muscle myosin thick filament assembly;GO:0035995~detection of mus…
>sp|Q8WZ42|TITIN_HUMAN Titin OS=Homo sapiens OX=9606 GN=TTN PE=1 SV=4T(25484)	Q8WZ42	TTN	T(25484)	EQKEKNSILWVKLNKTPIQDTKFKTTGLDEG	Peptide10473		-0.508807	-0.573266	-0.75708	-0.808284	-0.770188		0						-0.777621	-0.614113	-0.124499	-0.685871	-0.782505									0.0495245	0.91485		0.202425	0.690791		-0.103864	0.814278		-0.133132	0.795372		0	0.531206	0	0		GO:0002576~platelet degranulation;GO:0003300~cardiac muscle hypertrophy;GO:0006936~muscle contraction;GO:0006941~striated muscle contraction;GO:0007076~mitotic chromosome condensation;GO:0018108~peptidyl-tyrosine phosphorylation;GO:0030049~muscle filament sliding;GO:0030240~skeletal muscle thin filament assembly;GO:0030241~skeletal muscle myosin thick filament assembly;GO:0035995~detection of mus…
>sp|Q0VAK6|LMOD3_HUMAN Leiomodin-3 OS=Homo sapiens OX=9606 GN=LMOD3 PE=1 SV=1S(134)	Q0VAK6	LMOD3	S(134)	LKEKLNNEIVANKRESKGSSNIQETDEEDEE	Peptide10474		1.45217	-0.673426	-0.130004	-0.746972	-1.4425		0	-0.179383	-0.47882	-0.567889	-1.03371		-0.651106	-1.11811	0.298856	-1.31699	-0.916366		0.00590351	-1.25727	-0.571737	-0.759739	-0.929695			-1.00879	0.0656806		-0.422168	0.57462		-1.04964	0.0883061		-1.28231	0.0419519		0	0	0	0.705602		GO:0006936~muscle contraction;GO:0007015~actin filament organization;GO:0030239~myofibril assembly;GO:0051694~pointed-end actin filament capping
>sp|Q8WZ42|TITIN_HUMAN Titin OS=Homo sapiens OX=9606 GN=TTN PE=1 SV=4T(25247)	Q8WZ42	TTN	T(25247)	AKDLTIQPSLKLPFNTYSIQAGEDLKIEIPV	Peptide10475		-0.728265	-0.860949	-0.586191	-1.40141	-0.915602		0						-0.501765	-0.898737	-0.415105	-1.43111	-0.808243									-0.264828	0.307857		0.114367	0.755271		-0.801245	0.0232874		-0.246908	0.416021		0	0.451778	0	0		GO:0002576~platelet degranulation;GO:0003300~cardiac muscle hypertrophy;GO:0006936~muscle contraction;GO:0006941~striated muscle contraction;GO:0007076~mitotic chromosome condensation;GO:0018108~peptidyl-tyrosine phosphorylation;GO:0030049~muscle filament sliding;GO:0030240~skeletal muscle thin filament assembly;GO:0030241~skeletal muscle myosin thick filament assembly;GO:0035995~detection of mus…
>tr||H0YHV2|H0YHV2_HUMAN Tubulin alpha-1C chain (Fragment) OS=Homo sapiens OX=9606 GN=TUBA1C PE=4 SV=1S(68);S(75)	H0YHV2	TUBA1C	S(68);S(75)	SGTILAHCSLRLPGSSDPPASASQVAEITA_;CSLRLPGSSDPPASASQVAEITA________	Peptide10476		-1.09732	-0.594649	-0.380898	-0.912752	-0.678913		0						-0.560316	-0.493032	0.0183661	-1.02199	-0.432687									0.28498	0.471043		0.647554	0.150104		-0.138552	0.755522		0.27302	0.551428		0	0.7421	0	0
>tr||A6NGQ3|A6NGQ3_HUMAN Obscurin OS=Homo sapiens OX=9606 GN=OBSCN PE=1 SV=5S(7944)	A6NGQ3	OBSCN	S(7944)	PRPSSEACGEAQRLPSAPSGGAPIRDMGHPQ	Peptide10477		-0.73624	-0.583564	-0.123968	-0.572586	-0.670062		0						-0.476985	-0.251485	0.197753	-0.844747	-1.02127									0.189088	0.630401		0.643505	0.137776		-0.102054	0.815715		-0.239055	0.596738		0	0.467164	0	0		GO:0006468~protein phosphorylation;GO:0007275~multicellular organism development;GO:0035023~regulation of Rho protein sigl transduction;GO:0036309~protein localization to M-band;GO:0043065~positive regulation of apoptotic process;GO:0043547~positive regulation of GTPase activity;GO:0045214~sarcomere organization;GO:0051056~regulation of small GTPase mediated sigl transduction
>sp|Q8WZ42|TITIN_HUMAN Titin OS=Homo sapiens OX=9606 GN=TTN PE=1 SV=4S(27601)	Q8WZ42	TTN	S(27601)	ACVTVKLPYTTPGPPSTPWVTNVTRESITVG	Peptide10478		-0.724082	-0.801885	-0.392603	-0.788156	-0.829866		0						-0.537882	-0.675933	-0.450595	-0.674738	-0.374289									-0.107927	0.763304		0.209383	0.615198		-0.100465	0.786687		0.0289045	0.952402		0	0.700698	0	0		GO:0002576~platelet degranulation;GO:0003300~cardiac muscle hypertrophy;GO:0006936~muscle contraction;GO:0006941~striated muscle contraction;GO:0007076~mitotic chromosome condensation;GO:0018108~peptidyl-tyrosine phosphorylation;GO:0030049~muscle filament sliding;GO:0030240~skeletal muscle thin filament assembly;GO:0030241~skeletal muscle myosin thick filament assembly;GO:0035995~detection of mus…
>sp|Q8WZ42|TITIN_HUMAN Titin OS=Homo sapiens OX=9606 GN=TTN PE=1 SV=4T(27602)	Q8WZ42	TTN	T(27602)	CVTVKLPYTTPGPPSTPWVTNVTRESITVGW	Peptide10479		0.354143	0.103221	0.0418935	-0.15173	0.0699643		0	0.107628	-0.0219328	-0.119461	0.156291		-0.0458801	0.0216009	0.235937	-0.101854	-0.115954		0.137658	0.146877	0.0664768	-0.0474912	-0.103906			-0.0166486	0.937771		-0.0308866	0.919417		-0.216614	0.214171		-0.109881	0.576511		0	0	0	0.664655		GO:0002576~platelet degranulation;GO:0003300~cardiac muscle hypertrophy;GO:0006936~muscle contraction;GO:0006941~striated muscle contraction;GO:0007076~mitotic chromosome condensation;GO:0018108~peptidyl-tyrosine phosphorylation;GO:0030049~muscle filament sliding;GO:0030240~skeletal muscle thin filament assembly;GO:0030241~skeletal muscle myosin thick filament assembly;GO:0035995~detection of mus…
>sp|Q9BZ23|PANK2_HUMAN Pantothete kise 2; mitochondrial OS=Homo sapiens OX=9606 GN=PANK2 PE=1 SV=3S(189)	Q9BZ23	PANK2	S(189)	AVGASAEGTRRDRLGSYSGPTSVSRQRVESL	Peptide1048		0.039592	-0.0413049	-0.227157	0.0550312	-0.0927735		0	0.0327265	-0.10307	-0.110872	-0.0604969		-0.0807005	-0.111763	-0.0300493	-0.0615858	-0.234582		-0.247744	-0.127223	-0.0980996	-0.0584084	0.0201662			0.0103223	0.956493		-0.0423807	0.856882		0.0282545	0.875456		-0.0197084	0.930943		0	0	0	0		GO:0007286~spermatid development;GO:0009060~aerobic respiration;GO:0009108~coenzyme biosynthetic process;GO:0015937~coenzyme A biosynthetic process;GO:0015939~pantothete metabolic process;GO:0016310~phosphorylation;GO:0019217~regulation of fatty acid metabolic process;GO:0051881~regulation of mitochondrial membrane potential;GO:0070584~mitochondrion morphogenesis;GO:0090207~regulation of triglyce…
>sp|Q6UXD7|S49A3_HUMAN Solute carrier family 49 member A3 OS=Homo sapiens OX=9606 GN=SLC49A3 PE=2 SV=1S(453)	Q6UXD7	SLC49A3	S(453)	LAVFFHTPYRRLQAESGEPPSTRVGGADS	Peptide10480		-0.96833	-1.01582	-0.499265	-0.742202	-0.90291		0						-0.29767	-0.749835	-0.761805	-0.975001	-0.656937									-0.249828	0.574622		0.00246493	0.996889		-0.225601	0.634885		-0.146924	0.80019		0	0.671036	0	0		GO:0055085~transmembrane transport
>sp|P12883|MYH7_HUMAN Myosin-7 OS=Homo sapiens OX=9606 GN=MYH7 PE=1 SV=5S(1412)	P12883	MYH7	S(1412)	LQEAEEAVEAVKCSSLEKTKHRLQNEIED	Peptide10481		1.79229	0.0186042	-0.0504502	-2.24514	-0.995068		0						-0.430448	-0.819561	0.129692	-1.21316	-1.65703									-1.0814	0.366777		-0.641301	0.689533		-2.41007	0.087531		-2.00697	0.144604		0	0	0	0.726565		GO:0002026~regulation of the force of heart contraction;GO:0002027~regulation of heart rate;GO:0003009~skeletal muscle contraction;GO:0006936~muscle contraction;GO:0006941~striated muscle contraction;GO:0007512~adult heart development;GO:0014728~regulation of the force of skeletal muscle contraction;GO:0014883~transition between fast and slow fiber;GO:0014898~cardiac muscle hypertrophy in respons…
>sp|Q15772|SPEG_HUMAN S>tr|iated muscle preferentially expressed protein kise OS=Homo sapiens OX=9606 GN=SPEG PE=1 SV=4S(2166);S(2171)	Q15772	SPEG	S(2166);S(2171)	IPVARLGARRLQESPSLSALSEAQPSSPARP;LGARRLQESPSLSALSEAQPSSPARPSAPKP	Peptide10482		-0.0805654	0.384754	-0.0738236	0.0430407	0.304726		0	0.0919305	0.332752	-0.0638746	0.256519		0.211986	0.105564	0.180187	-0.143421	0.346947		-0.190927	0.416093	0.236613	0.207942	0.104202			0.264462	0.168731		0.183809	0.44818		0.0257985	0.918468		0.267975	0.22266		0	0.476299	0	0		GO:0006468~protein phosphorylation;GO:0007517~muscle organ development;GO:0008285~negative regulation of cell proliferation;GO:0042692~muscle cell differentiation
>sp|P02545|LM_HUMAN Prelamin-A/C OS=Homo sapiens OX=9606 GN=LM PE=1 SV=1S(107)	P02545	LM	S(107)	LDSVAKERARLQLELSKVREEFKELKARNTK	Peptide10483		-0.0527829	0.0398553	0.312571	-0.125875	0.197954		0	-0.06799	-0.18352	0.0150688	0.353165		0.101821	-0.472616	-0.0250547	0.174347	0.424795		0.101136	0.212993	-0.075075	-0.2893	0.351846			-0.109483	0.669557		-0.0303132	0.94427		-0.0939833	0.733872		0.294396	0.255281		0.328126	0	0	0		GO:0007077~mitotic nuclear envelope disassembly;GO:0007084~mitotic nuclear envelope reassembly;GO:0007517~muscle organ development;GO:0030334~regulation of cell migration;GO:0030951~establishment or maintence of microtubule cytoskeleton polarity;GO:0034504~protein localization to nucleus;GO:0035105~sterol regulatory element binding protein import into nucleus;GO:0036498~IRE1-mediated unfolded pro…
>sp|Q6ZR62|RTL4_HUMAN Re>tr|o>tr|ansposon Gag-like protein 4 OS=Homo sapiens OX=9606 GN=RTL4 PE=2 SV=2T(37)	Q6ZR62	RTL4	T(37)	NLILRLQMQHPTTENTAKRGQVMPALATTVM	Peptide10484		-0.40489	0.0807343	0.0527906	0.306066	-0.257956		0	-0.0955184	0.0988362	-0.119251	-0.0769937		0.0863303	-0.160343	-0.0758531	-0.0586866	0.205809		-0.0661477	0.221057	-0.311297	0.183921	0.00613502			0.107659	0.677152		0.0372963	0.933139		0.174189	0.497196		0.0654255	0.843059		0	0	0.549485	0
>tr||A0A0C4DFM5|A0A0C4DFM5_HUMAN Myotilin; isoform CRA_b OS=Homo sapiens OX=9606 GN=MYOT PE=1 SV=1S(30)	A0A0C4DFM5	MYOT	S(30)	NPCGSRLQPPGPETSSFSSQTKQSSIIIQPR	Peptide10485		-0.624236	-0.632439	-0.771818	-1.09366	-0.783154		0						-0.43401	-0.911949	-0.353176	-1.04598	-0.716735									-0.243071	0.463641		-0.0333737	0.95374		-0.540698	0.145378		-0.220821	0.568228		0	0.543807	0	0		GO:0006936~muscle contraction
>tr||A0A0C4DFM5|A0A0C4DFM5_HUMAN Myotilin; isoform CRA_b OS=Homo sapiens OX=9606 GN=MYOT PE=1 SV=1S(33)	A0A0C4DFM5	MYOT	S(33)	GSRLQPPGPETSSFSSQTKQSSIIIQPRQCT	Peptide10486		-0.774319	-1.21746	-0.698418	-0.868797	-0.486022		0						-0.543283	-0.936674	-0.443419	-0.943496	-0.542283									-0.418265	0.161058		0.0878822	0.849918		-0.247346	0.437195		0.144649	0.695922		0	0.538502	0	0		GO:0006936~muscle contraction
>tr||A0A0C4DFM5|A0A0C4DFM5_HUMAN Myotilin; isoform CRA_b OS=Homo sapiens OX=9606 GN=MYOT PE=1 SV=1S(38)	A0A0C4DFM5	MYOT	S(38)	PPGPETSSFSSQTKQSSIIIQPRQCTEQRFS	Peptide10487		-0.352387	-0.299109	-0.356	-1.10004	-0.59487		0						-0.281026	-0.527535	-0.317183	-0.792259	-0.676418									-0.0966153	0.76047		-0.0198847	0.969115		-0.629442	0.0672046		-0.318938	0.323933		0	0.301685	0	0		GO:0006936~muscle contraction
>sp|Q8WXI9|P66B_HUMAN >tr|anscriptiol repressor p66-beta OS=Homo sapiens OX=9606 GN=GATAD2B PE=1 SV=1S(486)	Q8WXI9	GATAD2B	S(486)	QEQEIEQRLQQQAALSPTTAPAVSSVSKQET	Peptide10488		-0.839236	-0.447106	-0.629189	-0.881038	-0.731671		0						-0.627748	-0.94769	-0.274723	-0.915563	-0.224616									0.0360944	0.945595		0.281536	0.609832		-0.164809	0.734276		0.255349	0.615566		0	0.807119	0	0		D-templated;GO:0000122~negative regulation of transcription from R polymerase II promoter;GO:0006306~D methylation;GO:0006351~transcription;GO:0043044~ATP-dependent chromatin remodeling
>sp|P20929|NEBU_HUMAN Nebulin OS=Homo sapiens OX=9606 GN=NEB PE=1 SV=5S(4947)	P20929	NEB	S(4947)	TVDLDRALHAYKLQSSNLYKTSLRTLPTGYR	Peptide10489		0.0313609	-0.405922	-0.345171	-0.263458	-0.653189		0	-0.146205	0.11015	0.465176	-1.21174		-0.457151	-0.193907	-0.358803	0.0838323	-0.462773		-0.0343363	-1.50606	-0.270278	-0.0746646	-0.242862			-0.447993	0.307722		-0.100994	0.897343		0.167753	0.74922		-0.527609	0.283661		0.433379	0	0	0		GO:0007517~muscle organ development;GO:0007525~somatic muscle development;GO:0030049~muscle filament sliding;GO:0030832~regulation of actin filament length
>tr||B5MCP4|B5MCP4_HUMAN Protein LBH OS=Homo sapiens OX=9606 GN=LBH PE=1 SV=1S(69)	B5MCP4	LBH	S(69)	PSDFDRCCKLKDRLPSIVVEPTEGEVESGEL	Peptide1049		-0.320412	-0.0821829	-0.505614	-0.433807	-0.627328		0	-0.175018	-0.856395	-0.420083	-0.443285		-0.408167	-0.606276	-0.372686	-0.602215	-0.060191		-0.235469	-0.542736	-0.401397	-0.43613	-0.42368			-0.110541	0.685442		-0.293011	0.291861		-0.232047	0.381397		-0.147609	0.625753		0	0	0	0
>sp|P12883|MYH7_HUMAN Myosin-7 OS=Homo sapiens OX=9606 GN=MYH7 PE=1 SV=5S(1288)	P12883	MYH7	S(1288)	LTSQRAKLQTENGELSRQLDEKEALISQLTR	Peptide10490		-0.419513	0.263119	-0.363991	-0.168147	-0.551795		0	0.0398856	-0.660883	-0.582129	-0.155103		-0.186187	-0.251989	-0.118481	-0.591258	-0.350432		-0.40744	0.204488	-0.45179	-0.191919	-0.379374			0.317161	0.194608		-0.145501	0.676466		-0.130078	0.653235		-0.105891	0.755775		0	0	0.38221	0		GO:0002026~regulation of the force of heart contraction;GO:0002027~regulation of heart rate;GO:0003009~skeletal muscle contraction;GO:0006936~muscle contraction;GO:0006941~striated muscle contraction;GO:0007512~adult heart development;GO:0014728~regulation of the force of skeletal muscle contraction;GO:0014883~transition between fast and slow fiber;GO:0014898~cardiac muscle hypertrophy in respons…
>sp|Q9UKX2|MYH2_HUMAN Myosin-2 OS=Homo sapiens OX=9606 GN=MYH2 PE=1 SV=1S(1294)	Q9UKX2	MYH2	S(1294)	LTAQRGRLQTESGEFSRQLDEKEALVSQLSR	Peptide10491		-0.463277	-0.378266	-0.334325	-0.205926	-0.194766		0	-0.439226	0.122426	0.402854	-0.85938		-0.345177	-0.22735	-0.193062	-0.011955	-0.122747		-0.0118911	-0.562542	-0.369452	-0.49508	0.0657566			-0.19676	0.582133		0.0114826	0.984609		0.127559	0.748758		-0.0726979	0.881747		0	0	0.342096	0		GO:0001778~plasma membrane repair;GO:0006936~muscle contraction;GO:0014823~response to activity;GO:0030049~muscle filament sliding;GO:0038096~Fc-gamma receptor sigling pathway involved in phagocytosis
>sp|Q9UKX2|MYH2_HUMAN Myosin-2 OS=Homo sapiens OX=9606 GN=MYH2 PE=1 SV=1S(1290)	Q9UKX2	MYH2	S(1290)	LINDLTAQRGRLQTESGEFSRQLDEKEALVS	Peptide10492		-0.794781	-0.624717	-0.646135	-0.639541	-0.344723		0						-0.353388	-0.694284	-0.400363	-0.576008	-0.343316									-0.0854164	0.811349		0.0508351	0.929179		-0.0336899	0.931033		0.230064	0.537565		0	0	0.476537	0		GO:0001778~plasma membrane repair;GO:0006936~muscle contraction;GO:0014823~response to activity;GO:0030049~muscle filament sliding;GO:0038096~Fc-gamma receptor sigling pathway involved in phagocytosis
>sp|Q9UKX2|MYH2_HUMAN Myosin-2 OS=Homo sapiens OX=9606 GN=MYH2 PE=1 SV=1T(1288)	Q9UKX2	MYH2	T(1288)	QRLINDLTAQRGRLQTESGEFSRQLDEKEAL	Peptide10493		0.130032	0.0216867	-0.0558283	0.147101	0.0613143		0	0.188066	0.0548028	0.358842	-0.157305		-0.127871	0.0902641	-0.0666673	0.341989	0.103809		0.0763255	-0.0990404	0.07303	-0.0369549	0.141274			0.0306226	0.888358		-0.0182871	0.954115		0.183123	0.329616		0.0176517	0.950516		0	0	0	0		GO:0001778~plasma membrane repair;GO:0006936~muscle contraction;GO:0014823~response to activity;GO:0030049~muscle filament sliding;GO:0038096~Fc-gamma receptor sigling pathway involved in phagocytosis
>sp|P12882|MYH1_HUMAN Myosin-1 OS=Homo sapiens OX=9606 GN=MYH1 PE=1 SV=3Y(1291)	P12882	MYH1	Y(1291)	DLTAQRARLQTESGEYSRQLDEKDTLVSQLS	Peptide10494		0.863045	0.406254	0.553701	-0.0692175	0.952289		0	0.451404	0.771446	-0.0169748	0.813415		0.753182	-0.0740165	0.602047	0.438676	0.224088		-0.175005	1.36309	1.10286	-0.66613	0.600244			0.176378	0.76047		0.397208	0.530013		-0.438717	0.412919		0.287204	0.642516		0	0	0	0.439061		GO:0006936~muscle contraction
>sp|P12882|MYH1_HUMAN Myosin-1 OS=Homo sapiens OX=9606 GN=MYH1 PE=1 SV=3T(1286)	P12882	MYH1	T(1286)	QRLINDLTAQRARLQTESGEYSRQLDEKDTL	Peptide10495		0.944569	0.474751	0.540966	0.343892	0.804755		0	0.904504	0.742059	0.0548398	0.727744		0.680969	0.406846	0.483311	0.661711	0.303543		-0.236252	1.33398	1.61555	-0.447867	0.42699			0.432697	0.404112		0.498151	0.410547		-0.194178	0.74854		0.218436	0.748453		0	0	0	0.400106		GO:0006936~muscle contraction
>sp|P12882|MYH1_HUMAN Myosin-1 OS=Homo sapiens OX=9606 GN=MYH1 PE=1 SV=3S(1292)	P12882	MYH1	S(1292)	LTAQRARLQTESGEYSRQLDEKDTLVSQLSR	Peptide10496		0.494362	0.30879	0.735291	0.36139	1.03834		0	0.573541	0.679138	0.0113845	0.985969		0.748167	0.208565	0.5749	0.608163	0.577521		-0.283321	1.67934	1.67413	-0.725089	0.650877			0.452758	0.442217		0.676062	0.293281		-0.17584	0.79879		0.573375	0.3838		0	0.35984	0	0		GO:0006936~muscle contraction
>sp|P02545|LM_HUMAN Prelamin-A/C OS=Homo sapiens OX=9606 GN=LM PE=1 SV=1S(326)	P02545	LM	S(326)	KQLAAKEAKLRDLEDSLARERDTSRRLLAEK	Peptide10497		0.271786	0.631111	0.257686	-0.546993	-0.0343724		0	0.22887	-0.0796705	-0.077272	0.197494		0.0756072	-0.129525	0.380729	-0.353233	-0.105914		-0.0819577	0.292092	-0.0111229	0.0896361	-0.167534			0.189278	0.507576		0.0705465	0.879014		-0.288325	0.32909		-0.0939404	0.807016		0	0	0	0.416686		GO:0007077~mitotic nuclear envelope disassembly;GO:0007084~mitotic nuclear envelope reassembly;GO:0007517~muscle organ development;GO:0030334~regulation of cell migration;GO:0030951~establishment or maintence of microtubule cytoskeleton polarity;GO:0034504~protein localization to nucleus;GO:0035105~sterol regulatory element binding protein import into nucleus;GO:0036498~IRE1-mediated unfolded pro…
>sp|O43707|ACTN4_HUMAN Alpha-actinin-4 OS=Homo sapiens OX=9606 GN=ACTN4 PE=1 SV=2S(367)	O43707	ACTN4	S(367)	QLEINFNTLQTKLRLSNRPAFMPSEGKMVSD	Peptide10498		-0.312818	0.330539	0.239835	-0.656393	0.473673		0	-0.136658	0.0596774	-0.0655379	0.364773		0.199952	0.0852758	0.236729	-0.130813	-0.0608667		-0.0602635	0.234177	0.202794	-0.0976941	0.124332			0.171616	0.519465		0.228041	0.465869		-0.194327	0.487408		0.26876	0.354602		0	0.427392	0	0		GO:0001666~response to hypoxia;GO:0002576~platelet degranulation;GO:0015031~protein transport;GO:0030050~vesicle transport along actin filament;GO:0030335~positive regulation of cell migration;GO:0032417~positive regulation of sodium:proton antiporter activity;GO:0035357~peroxisome proliferator activated receptor sigling pathway;GO:0042981~regulation of apoptotic process;GO:0048384~retinoic acid …
>sp|Q8WZ42|TITIN_HUMAN Titin OS=Homo sapiens OX=9606 GN=TTN PE=1 SV=4T(23726)	Q8WZ42	TTN	T(23726)	TRCHKRLIGELRLRVTGLIENHDYEFRVSAE	Peptide10499		0.152327	0.0796496	0.00932186	-0.131875	0.0345817		0	-0.0183716	0.0125304	-0.0713277	0.0681011		-0.0180793	-0.0579317	0.163791	-0.227846	0.0786409		0.0567521	0.152476	-0.00990959	-0.0629123	-0.0644933			-0.00879429	0.960032		-0.00381652	0.987838		-0.17124	0.232172		-0.0185423	0.928932		0	0	0	0		GO:0002576~platelet degranulation;GO:0003300~cardiac muscle hypertrophy;GO:0006936~muscle contraction;GO:0006941~striated muscle contraction;GO:0007076~mitotic chromosome condensation;GO:0018108~peptidyl-tyrosine phosphorylation;GO:0030049~muscle filament sliding;GO:0030240~skeletal muscle thin filament assembly;GO:0030241~skeletal muscle myosin thick filament assembly;GO:0035995~detection of mus…
>sp|O43182|RHG06_HUMAN Rho GTPase-activating protein 6 OS=Homo sapiens OX=9606 GN=ARHGAP6 PE=1 SV=3S(820)	O43182	ARHGAP6	S(820)	PATEGRAHPAVSRACSTPHVQVAGKAERPTA	Peptide105		-0.43551	-0.774477	-0.539321	-0.861773	-0.33878		0						-0.676183	-0.765616	-0.0308116	-0.635753	-0.783627									-0.2142	0.605632		0.27078	0.599657		-0.192917	0.662136		-0.00535723	0.993605		0	0.644977	0	0		GO:0007015~actin filament organization;GO:0007165~sigl transduction;GO:0007202~activation of phospholipase C activity;GO:0007266~Rho protein sigl transduction;GO:0009967~positive regulation of sigl transduction;GO:0010518~positive regulation of phospholipase activity;GO:0030041~actin filament polymerization;GO:0043547~positive regulation of GTPase activity;GO:0048041~focal adhesion assembly;GO:00…
>sp|Q9UDY4|DNJB4_HUMAN DJ homolog subfamily B member 4 OS=Homo sapiens OX=9606 GN=DJB4 PE=1 SV=1S(148)	Q9UDY4	DJB4	S(148)	SAFGFSMNGYPRDRNSVGPSRLKQDPPVIHE	Peptide1050		-0.0473002	-1.04298	-0.231227	-0.614013	-0.680097		0	-0.738885	-1.07977	-0.318077	-0.490317		-0.434113	-0.938827	-0.576472	-0.656315	-0.188499		-0.00542359	-1.33097	-0.490471	-0.748141	-0.342928			-0.891207	0.00265074		-0.472777	0.128936		-0.462427	0.133885		-0.303751	0.358037		0.62098	0	0	0		GO:0006457~protein folding;GO:0006986~response to unfolded protein;GO:0009408~response to heat
>sp|Q8WZ42|TITIN_HUMAN Titin OS=Homo sapiens OX=9606 GN=TTN PE=1 SV=4T(24808)	Q8WZ42	TTN	T(24808)	IKCNKRRITDLRLRVTGLTEDHEYEFRVSAE	Peptide10500		0.0776106	0.174651	-0.114679	-0.0230576	-0.130457		0	0.108206	-0.0536539	-0.0475227	-0.0608788		-0.152448	-0.0545886	0.151519	-0.073364	-0.184263		-0.0837423	-0.0687039	-0.0690616	0.121338	-0.128066			0.079536	0.617597		0.0181761	0.948026		0.0339934	0.853085		-0.0862713	0.638452		0	0	0	0		GO:0002576~platelet degranulation;GO:0003300~cardiac muscle hypertrophy;GO:0006936~muscle contraction;GO:0006941~striated muscle contraction;GO:0007076~mitotic chromosome condensation;GO:0018108~peptidyl-tyrosine phosphorylation;GO:0030049~muscle filament sliding;GO:0030240~skeletal muscle thin filament assembly;GO:0030241~skeletal muscle myosin thick filament assembly;GO:0035995~detection of mus…
>sp|Q8WZ42|TITIN_HUMAN Titin OS=Homo sapiens OX=9606 GN=TTN PE=1 SV=4T(25891)	Q8WZ42	TTN	T(25891)	TKCNKKTLTDLRLRVTGLTEGHSYEFRVAAE	Peptide10501		0.504452	0.05544	-0.0412177	-0.0997971	-0.0053669		0	0.125464	-0.138424	-0.0243898	0.0550731		0.10897	0.00430463	0.0235245	-0.00389763	-0.1223		0.149923	0.243506	0.152967	-0.0840707	-0.264568			-0.0836577	0.676771		-0.191624	0.365735		-0.243875	0.213016		-0.275127	0.159926		0	0	0	0.658397		GO:0002576~platelet degranulation;GO:0003300~cardiac muscle hypertrophy;GO:0006936~muscle contraction;GO:0006941~striated muscle contraction;GO:0007076~mitotic chromosome condensation;GO:0018108~peptidyl-tyrosine phosphorylation;GO:0030049~muscle filament sliding;GO:0030240~skeletal muscle thin filament assembly;GO:0030241~skeletal muscle myosin thick filament assembly;GO:0035995~detection of mus…
>tr||A6NGQ3|A6NGQ3_HUMAN Obscurin OS=Homo sapiens OX=9606 GN=OBSCN PE=1 SV=5S(1430)	A6NGQ3	OBSCN	S(1430)	ADAGEYTCEAGGQRLSFHLDVSEPKAVFAKE	Peptide10502		0.142463	0.640586	0.77969	-0.110944	-0.220851		0	0.643392	0.56942	-0.0919048	0.0320586		0.151748	0.0627176	0.315757	-0.0256325	0.207448		-0.10901	0.229302	0.0667109	0.0106267	0.357182			0.347699	0.183254		0.386594	0.19201		-0.100764	0.753169		0.0476593	0.906062		0	0.339285	0	0		GO:0006468~protein phosphorylation;GO:0007275~multicellular organism development;GO:0035023~regulation of Rho protein sigl transduction;GO:0036309~protein localization to M-band;GO:0043065~positive regulation of apoptotic process;GO:0043547~positive regulation of GTPase activity;GO:0045214~sarcomere organization;GO:0051056~regulation of small GTPase mediated sigl transduction
>sp|Q8WZ42|TITIN_HUMAN Titin OS=Homo sapiens OX=9606 GN=TTN PE=1 SV=4T(19139)	Q8WZ42	TTN	T(19139)	DLQKPVLDLKLSGVLTVKAGDTIRLEAGVRG	Peptide10503		0.262423	0.263507	0.0155142	0.0945219	-0.0496672		0	0.399093	0.0811841	0.0371082	-0.0519379		-0.176672	0.00898868	0.247922	0.172788	-0.0601767		-0.0656296	0.119649	0.279602	-0.105222	-0.000381616			0.192779	0.279827		0.151025	0.504712		0.0447687	0.840308		-0.0455712	0.86213		0	0	0	0		GO:0002576~platelet degranulation;GO:0003300~cardiac muscle hypertrophy;GO:0006936~muscle contraction;GO:0006941~striated muscle contraction;GO:0007076~mitotic chromosome condensation;GO:0018108~peptidyl-tyrosine phosphorylation;GO:0030049~muscle filament sliding;GO:0030240~skeletal muscle thin filament assembly;GO:0030241~skeletal muscle myosin thick filament assembly;GO:0035995~detection of mus…
>sp|Q8WZ42|TITIN_HUMAN Titin OS=Homo sapiens OX=9606 GN=TTN PE=1 SV=4S(15686)	Q8WZ42	TTN	S(15686)	EPFVLPLTQRLSIDNSKKGESQLRVRDSLRP	Peptide10504		-0.722434	-0.633764	-0.715461	-0.798581	-0.709484		0						-0.557576	-0.809177	-0.400604	-0.761118	-0.672657									-0.0814657	0.797853		0.0819723	0.854375		-0.139845	0.657097		-0.0510661	0.899111		0	0.638683	0	0		GO:0002576~platelet degranulation;GO:0003300~cardiac muscle hypertrophy;GO:0006936~muscle contraction;GO:0006941~striated muscle contraction;GO:0007076~mitotic chromosome condensation;GO:0018108~peptidyl-tyrosine phosphorylation;GO:0030049~muscle filament sliding;GO:0030240~skeletal muscle thin filament assembly;GO:0030241~skeletal muscle myosin thick filament assembly;GO:0035995~detection of mus…
>sp|Q8WZ42|TITIN_HUMAN Titin OS=Homo sapiens OX=9606 GN=TTN PE=1 SV=4T(25716)	Q8WZ42	TTN	T(25716)	TDGGQYILKLSNVGGTKSIPITVKVLDRPGP	Peptide10505		-1.12845	-0.502537	0.101371	-0.0670427	0.0493391		0	-0.682373	-0.0944301	-0.0282722	-0.162742		-0.126271	-0.634229	-0.324735	0.192973	0.554472		0.0343885	-0.421813	-0.109572	-0.504965	0.364772			-0.255156	0.51139		0.198241	0.701859		0.203256	0.631243		0.506543	0.21627		0	0	0.373857	0		GO:0002576~platelet degranulation;GO:0003300~cardiac muscle hypertrophy;GO:0006936~muscle contraction;GO:0006941~striated muscle contraction;GO:0007076~mitotic chromosome condensation;GO:0018108~peptidyl-tyrosine phosphorylation;GO:0030049~muscle filament sliding;GO:0030240~skeletal muscle thin filament assembly;GO:0030241~skeletal muscle myosin thick filament assembly;GO:0035995~detection of mus…
>sp|Q8WZ42|TITIN_HUMAN Titin OS=Homo sapiens OX=9606 GN=TTN PE=1 SV=4S(25718)	Q8WZ42	TTN	S(25718)	GGQYILKLSNVGGTKSIPITVKVLDRPGPPE	Peptide10506		1.30333	-0.633856	-0.360444	-1.57797	-0.94273		0						-0.350314	-0.841313	-0.463937	-0.818192	-0.95547									-1.21409	0.145286		-0.888697	0.362815		-1.67459	0.0883061		-1.42561	0.13864		0	0	0	0.747325		GO:0002576~platelet degranulation;GO:0003300~cardiac muscle hypertrophy;GO:0006936~muscle contraction;GO:0006941~striated muscle contraction;GO:0007076~mitotic chromosome condensation;GO:0018108~peptidyl-tyrosine phosphorylation;GO:0030049~muscle filament sliding;GO:0030240~skeletal muscle thin filament assembly;GO:0030241~skeletal muscle myosin thick filament assembly;GO:0035995~detection of mus…
>sp|O95251|KAT7_HUMAN Histone acetyl>tr|ansferase KAT7 OS=Homo sapiens OX=9606 GN=KAT7 PE=1 SV=1S(57)	O95251	KAT7	S(57)	VTRSSARLSQSSQDSSPVRNLQSFGTEEPAY	Peptide10507		0.980223	-0.968434	0.0983222	0.85711	0.254646		0	-0.326957	-0.0452729	-0.0574789	0.632894		0.743983	-0.251363	-0.483463	0.811042	-0.21294		0.446888	0.295557	-0.132988	0.209655	0.137263			-0.855573	0.0495797		-0.683624	0.170678		-0.0876918	0.876894		-0.339808	0.53354		0.505925	0	0	0		D-templated;GO:0006260~D replication;GO:0006351~transcription;GO:0006355~regulation of transcription;GO:0043966~histone H3 acetylation;GO:0043981~histone H4-K5 acetylation;GO:0043982~histone H4-K8 acetylation;GO:0043983~histone H4-K12 acetylation;GO:0043984~histone H4-K16 acetylation;GO:1900182~positive regulation of protein localization to nucleus
>sp|Q8NGW1|OR6B3_HUMAN Olfactory receptor 6B3 OS=Homo sapiens OX=9606 GN=OR6B3 PE=3 SV=1S(317);S(318);S(328)	Q8NGW1	OR6B3	S(317);S(318);S(328)	KKAFGLTSCAVEGRLSSLLELHLQIHSQPL_;KAFGLTSCAVEGRLSSLLELHLQIHSQPL__;EGRLSSLLELHLQIHSQPL____________	Peptide10508		-0.503499	-0.489051	-0.717759	-1.02983	-0.613033		0						-0.530857	-0.439016	-0.250457	-0.907901	-0.67955									0.0531446	0.887195		0.0330702	0.952433		-0.451687	0.192929		-0.129114	0.746493		0	0.513734	0	0		GO:0007186~G-protein coupled receptor sigling pathway;GO:0050911~detection of chemical stimulus involved in sensory perception of smell
>sp|Q9BX66|SRBS1_HUMAN Sorbin and SH3 domain-containing protein 1 OS=Homo sapiens OX=9606 GN=SORBS1 PE=1 SV=3S(326)	Q9BX66	SORBS1	S(326)	IVLLQHNREQQKRLSSLSDPVSERRVGEQDS	Peptide10509		-1.207	-0.512004	-0.547961	-1.04354	-1.28717		0						-1.09022	-0.454872	0.0760901	-1.22802	-1.30685									0.66517	0.0773083		0.912673	0.0417299		0.0128314	0.977033		-0.1484	0.75533		0	0.485393	0	0		GO:0006936~muscle contraction;GO:0007015~actin filament organization;GO:0007155~cell adhesion;GO:0007160~cell-matrix adhesion;GO:0008286~insulin receptor sigling pathway;GO:0009967~positive regulation of sigl transduction;GO:0015758~glucose transport;GO:0032869~cellular response to insulin stimulus;GO:0043149~stress fiber assembly;GO:0045725~positive regulation of glycogen biosynthetic process;GO…
>sp|Q8WXF7|ATLA1_HUMAN Atlastin-1 OS=Homo sapiens OX=9606 GN=ATL1 PE=1 SV=1S(10)	Q8WXF7	ATL1	S(10)	______MAKNRRDRNSWGGFSEKTYEWSSEE	Peptide1051		-0.60189	-0.672633	-0.643585	-0.873086	-0.499825		0						-0.711068	-0.793414	-0.300529	-0.740391	-0.544517									-0.0765444	0.812191		0.184422	0.618669		-0.150259	0.634054		0.134308	0.704322		0	0.794082	0	0		GO:0007029~endoplasmic reticulum organization;GO:0007409~axonogenesis;GO:0051260~protein homooligomerization
>sp|Q8WZ42|TITIN_HUMAN Titin OS=Homo sapiens OX=9606 GN=TTN PE=1 SV=4T(14767)	Q8WZ42	TTN	T(14767)	TDSEVWHKLSSTVKDTNFKATKLIPNKEYIF	Peptide10510		0.74485	0.373968	0.134056	0.239073	0.273344		0	0.803784	0.0533467	0.461532	0.180036		-0.0874232	0.387298	0.190568	0.557804	0.034443		-0.00526289	0.317632	0.522701	-0.0672474	0.267359			0.30763	0.299987		0.0621268	0.908131		0.13475	0.700388		0.0257545	0.957813		0	0	0	0.32851		GO:0002576~platelet degranulation;GO:0003300~cardiac muscle hypertrophy;GO:0006936~muscle contraction;GO:0006941~striated muscle contraction;GO:0007076~mitotic chromosome condensation;GO:0018108~peptidyl-tyrosine phosphorylation;GO:0030049~muscle filament sliding;GO:0030240~skeletal muscle thin filament assembly;GO:0030241~skeletal muscle myosin thick filament assembly;GO:0035995~detection of mus…
>sp|Q8WZ42|TITIN_HUMAN Titin OS=Homo sapiens OX=9606 GN=TTN PE=1 SV=4S(14762)	Q8WZ42	TTN	S(14762)	VERRATDSEVWHKLSSTVKDTNFKATKLIPN	Peptide10511		1.10116	0.331458	-0.216316	-0.340201	0.385304		0	0.268568	0.238823	0.0936037	0.304736		-0.294484	0.36243	0.658175	-0.315698	-0.344429		0.365417	-0.053108	-0.284406	0.390184	-0.0322412			-0.0656864	0.909226		-0.193955	0.776185		-0.336051	0.500942		-0.214681	0.717795		0	0	0	0.66893		GO:0002576~platelet degranulation;GO:0003300~cardiac muscle hypertrophy;GO:0006936~muscle contraction;GO:0006941~striated muscle contraction;GO:0007076~mitotic chromosome condensation;GO:0018108~peptidyl-tyrosine phosphorylation;GO:0030049~muscle filament sliding;GO:0030240~skeletal muscle thin filament assembly;GO:0030241~skeletal muscle myosin thick filament assembly;GO:0035995~detection of mus…
>sp|Q8WZ42|TITIN_HUMAN Titin OS=Homo sapiens OX=9606 GN=TTN PE=1 SV=4T(25781)	Q8WZ42	TTN	T(25781)	IEKRETSRLSWTQVSTEVQALNYKVTKLLPG	Peptide10512		0.0353732	-0.0371516	-0.227076	0.243619	-0.0885814		0	-0.0122484	-0.045381	0.0280099	-0.0507592		0.230434	0.0112351	-0.374812	-0.0112704	0.279395		-0.0728953	-0.0136	0.00454639	0.260202	-0.125168			-0.0611692	0.778241		-0.208909	0.324924		0.081912	0.708502		-0.0445064	0.869269		0.391159	0	0	0		GO:0002576~platelet degranulation;GO:0003300~cardiac muscle hypertrophy;GO:0006936~muscle contraction;GO:0006941~striated muscle contraction;GO:0007076~mitotic chromosome condensation;GO:0018108~peptidyl-tyrosine phosphorylation;GO:0030049~muscle filament sliding;GO:0030240~skeletal muscle thin filament assembly;GO:0030241~skeletal muscle myosin thick filament assembly;GO:0035995~detection of mus…
>sp|Q8WZ42|TITIN_HUMAN Titin OS=Homo sapiens OX=9606 GN=TTN PE=1 SV=4T(29293)	Q8WZ42	TTN	T(29293)	RLTAPELDIDANFKQTHVVRAGASIRLFIAY	Peptide10513		0.158873	0.540369	0.00486054	0.161459	0.134254		0	0.24506	0.0910415	-0.0093833	0.342104		0.20265	0.0625142	0.347964	-0.0112382	-0.009121		-0.223804	0.638331	0.263691	0.401364	-0.150053			0.337139	0.156646		0.142459	0.676466		0.101121	0.731179		0.0448661	0.903616		0	0	0.353758	0		GO:0002576~platelet degranulation;GO:0003300~cardiac muscle hypertrophy;GO:0006936~muscle contraction;GO:0006941~striated muscle contraction;GO:0007076~mitotic chromosome condensation;GO:0018108~peptidyl-tyrosine phosphorylation;GO:0030049~muscle filament sliding;GO:0030240~skeletal muscle thin filament assembly;GO:0030241~skeletal muscle myosin thick filament assembly;GO:0035995~detection of mus…
>sp|Q3V6T2|GRDN_HUMAN Girdin OS=Homo sapiens OX=9606 GN=CCDC88A PE=1 SV=2T(929)	Q3V6T2	CCDC88A	T(929)	EKLKTQQMNNDLEKLTHELEKIGLNKERLLH	Peptide10514		-1.23008	-0.117014	0.0922649	0.667262	-0.317918		0	-0.145833	-0.930051	-0.378719	0.358943		-0.19387	-0.10492	-0.221811	0.290178	-0.249714		-0.229152	0.605375	-0.495264	-0.00282433	0.0577621			0.472679	0.323124		0.0245614	0.978476		0.557251	0.277798		0.375545	0.508231		0	0	0.574553	0		GO:0001932~regulation of protein phosphorylation;GO:0006260~D replication;GO:0006275~regulation of D replication;GO:0010975~regulation of neuron projection development;GO:0016477~cell migration;GO:0030032~lamellipodium assembly;GO:0031929~TOR sigling;GO:0032148~activation of protein kise B activity;GO:0032956~regulation of actin cytoskeleton organization;GO:0042127~regulation of cell proliferatio…
>sp|Q8N3K9|CMYA5_HUMAN Cardiomyopathy-associated protein 5 OS=Homo sapiens OX=9606 GN=CMYA5 PE=1 SV=3S(479)	Q8N3K9	CMYA5	S(479)	ERAEPVSAKLTPTHPSVKGEKEENMLEPSIS	Peptide10515		-1.84471	-0.436246	0.0731333	-1.24301	-0.640019		0						-0.804387	-0.477956	0.232895	-0.959186	-0.770968									0.867448	0.10788		1.47756	0.0277701		0.223452	0.710081		0.619055	0.303349		0	0.661912	0	0
>sp|Q9Y2K7|KDM2A_HUMAN Lysine-specific demethylase 2A OS=Homo sapiens OX=9606 GN=KDM2A PE=1 SV=3S(558)	Q9Y2K7	KDM2A	S(558)	MKPAPRLTPVRPAAASPIVSGARRRRVRCRK	Peptide10516		-0.104896	-0.432692	-0.33314	0.0111885	-0.0118105		0	-0.225519	-0.299558	-0.374671	-0.0702767		-0.144677	-0.218284	-0.316269	0.0290535	0.140672		0.305673	-0.0428552	-0.0923153	-0.537867	-0.0800411			-0.243863	0.271133		-0.274346	0.276457		-0.232099	0.33701		-0.019389	0.957813		0.394264	0	0	0		D-templated;GO:0006303~double-strand break repair via nonhomologous end joining;GO:0006351~transcription;GO:0006355~regulation of transcription;GO:0055114~oxidation-reduction process;GO:0070544~histone H3-K36 demethylation
>sp|Q86TC9|MYPN_HUMAN Myopalladin OS=Homo sapiens OX=9606 GN=MYPN PE=1 SV=2T(1046)	Q86TC9	MYPN	T(1046)	SGHLMVQSLPIRSRLTSAGQSHRGRSRVQER	Peptide10517		-2.34036	0.218184	0.681681	-1.3996	-1.21992		0						-1.37459	0.268893	1.10325	-2.11695	-1.52901									2.10101	0.00643416		2.74994	0.00471902		0.0991983	0.89426		0.483008	0.502095		0	0.531525	0	0		GO:0045214~sarcomere organization
[truncated: 12,329 more rows]
[truncated: 15 more columns]

## Sheet: Pre PhosR
Fasta header	Uniprot	Gene Name	Site	Sequence	Peptide #		Pre Subject A	0 hr END Subject A	0 hr RE Subject A	3 hr END Subject A	3 hr RE Subject A		Pre Subject B	0 hr END Subject B	0 hr RE Subject B	3 hr END Subject B	3 hr RE Subject B		Pre Subject C	0 hr END Subject C	0 hr RE Subject C	3 hr END Subject C	3 hr RE Subject C		Pre Subject D	0 hr END Subject D	0 hr RE Subject D	3 hr END Subject D	3 hr RE Subject D
>sp|Q14693|LPIN1_HUMAN Phosphatidate phosphatase LPIN1 OS=Homo sapiens OX=9606 GN=LPIN1 PE=1 SV=2S(611)	Q14693	LPIN1	S(611)	HESSSSDEERAAAKPSNAGHLPLLPNVSYKK	Peptide1		0.889557	0.625416	0.831509	0.619408	0.776168		1						0.630241	0.747848	0.592182	0.68471	0.728108
[truncated: 12,906 more rows]
