# Supplementary material for: Identification of a Resistance Exercise-Specific Signaling Pathway that Drives Skeletal Muscle Growth
Source: Research Square preprint supplement (doi:10.21203/rs.3.rs-4997138/v1), 2024-11-12
Supplement: Supplementary file 5 [file 94e7413d470b84ca60a53379.xlsx]

## Sheet: Supplementary Table 9
Characteristics of the subjects for the validation study
		Age	Height	Mass	BMI	Body fat	Lean mass	Lean mass	VO2 peak	Peak Work	Leg Press 1RM	Leg Ext. 1 RM	Exercise Order
SubjectI ID	Sex	(years)	(cm)	(kg)	(kg/m2)	(%)	(kg)	(%)	mL/kg/min	(Watts)	(lbs)	(lbs)
S1	F	20	175	67.5	22.0408	28.9	47.147	69.8474	41.5	240	310	125	RE followed by END
S2	M	20	177	75.5	24.0991	9.2	65.73	87.0596	55.3	360	850	180	RE followed by END
S3	M	23	171	74.5	25.4779	19.1	59.398	79.7289	51.1	313	600	160	RE followed by END
S4	M	26	175	113	36.898	34.5	70.918	62.7593	44.3	405	745	180	END followed by RE
S6	F	19	168	73.4	26.0062	30.5	47.633	64.8951	45.5	303	540	125	RE followed by END
S7	F	20	165	68.5	25.1607	30.2	44.753	65.3328	40.5	224	270	90	END followed by RE
S8	F	19	163	55.3	20.8137	23.7	41.163	74.4358	38.1	221	272	70	RE followed by END
S9	F	21	180	67.9	20.9568	27.1	47.655	70.1841	43.9	277	340	80	END followed by RE
S10	M	21	174	86	28.4053	19.3	66.923	77.8174	48	345	640	185	RE followed by END
S11	M	20	168	67.5	23.9158	11.2	55.461	82.1644	58.1	354	630	100	END followed by RE
S12	M	20	187	90.1	25.7657	23.1	66.5	73.8069	40.5	313	540	170	RE followed by END
S13	F	20	167	67.9	24.3465	31.1	49.546	72.9691	38.2	236	520	120	END followed by RE
Average		20.75	172.5	75.5917	25.3239	23.9917	55.2356	73.4167	45.4167	299.25	521.417	132.083
STD		1.95982	6.88212	14.8799	4.25115	8.00482	10.2599	7.3731	6.53923	60.4139	189.186	41.8036
SEM		0.565752	1.9867	4.29546	1.2272	2.31079	2.96177	2.12843	1.88771	17.44	54.6133	12.0676
