# Supplementary material for: Identification of a Resistance Exercise-Specific Signaling Pathway that Drives Skeletal Muscle Growth
Source: Research Square preprint supplement (doi:10.21203/rs.3.rs-4997138/v1), 2024-11-12
Supplement: Supplementary file 6 [file b748b6fc069bbaa9bfe30868.xlsx]

## Sheet: Cluster 1- All Terms
Cluster	Term Type	Name	Size	Score	P value	Benj. Hoch. FDR	-log10 q-value
1	OMIM_DISEASE	605637~Proximal myopathy and ophthalmoplegia	73	0.338625	4.4549e-14	7.13229e-11	10.1468
1	GOTERM_CC_DIRECT	GO:0005826~actomyosin contractile ring	75	0.324954	2.13192e-13	2.13832e-10	9.66993
1	GOTERM_BP_DIRECT	GO:0001778~plasma membrane repair	90	0.288169	1.02992e-12	5.94469e-09	8.22587
1	GOTERM_BP_DIRECT	GO:0038096~Fc-gamma receptor signaling pathway involved in phagocytosis	130	0.200691	2.59154e-09	7.47918e-06	5.12615
1	GOTERM_CC_DIRECT	GO:0070062~extracellular exosome	4087	-0.0413584	1.08056e-08	5.41902e-06	5.26608
1	GOTERM_BP_DIRECT	GO:0014823~response to activity	147	0.169093	9.69296e-08	0.000186493	3.72934
1	BIOCARTA	h_nfatPathway:NFAT and Hypertrophy of the heart (Transcription in the broken heart)	142	0.164251	3.54642e-07	0.000101073	3.99536
1	GOTERM_CC_DIRECT	GO:0043209~myelin sheath	322	-0.104615	1.24026e-06	0.000414659	3.38231
1	GOTERM_MF_DIRECT	GO:0035374~chondroitin sulfate binding	8	0.634138	2.72556e-06	0.00493599	2.30663
1	SMART	SM00311:PWI	4	0.887197	3.46823e-06	0.0019873	2.70174
1	GOTERM_BP_DIRECT	GO:0048678~response to axon injury	13	0.484495	4.93897e-06	0.00712693	2.1471
1	GOTERM_BP_DIRECT	GO:0010975~regulation of neuron projection development	11	0.516749	7.41514e-06	0.00856003	2.06752
1	INTERPRO	class 1	4	0.851662	8.38691e-06	0.00853578	2.06876
1	INTERPRO	helix-hairpin-helix domain	4	0.851662	8.38691e-06	0.011381	1.94382
1	INTERPRO	IPR004509:Competence protein ComEA	4	0.851662	8.38691e-06	0.0170716	1.76773
1	SMART	SM00278:HhH1	4	0.851662	8.38691e-06	0.00240285	2.61927
1	GOTERM_BP_DIRECT	GO:0051694~pointed-end actin filament capping	29	0.303222	1.98358e-05	0.0190821	1.71937
1	INTERPRO	IPR004934:Tropomodulin	29	0.303222	1.98358e-05	0.0161503	1.79182
1	GOTERM_CC_DIRECT	GO:0005739~mitochondrion	934	-0.0552636	2.08815e-05	0.00523604	2.281
1	GOTERM_CC_DIRECT	GO:0005743~mitochondrial inner membrane	239	-0.105389	2.41734e-05	0.00484919	2.31433
1	Motifs	GSK3 kinase substrate motif	1195	0.0457666	8.06754e-05	0.00871294	2.05984
1	GOTERM_CC_DIRECT	GO:0070382~exocytic vesicle	10	0.472373	9.3807e-05	0.0156814	1.80462
1	GOTERM_CC_DIRECT	GO:0005576~extracellular region	1771	-0.0378892	0.000106905	0.015318	1.8148
1	Motifs	Chk1 kinase substrate motif	889	-0.047312	0.000369703	0.019964	1.69975
1	Motifs	MAPKAPK2 kinase substrate motif	1570	0.0364008	0.000406121	0.0146204	1.83504

## Sheet: Cluster 2- All Terms
Cluster	Term Type	Name	Size	Score	P value	Benj. Hoch. FDR	-log10 q-value
2	GOTERM_BP_DIRECT	GO:0006936~muscle contraction	2398	-0.126078	1.02058e-32	5.89078e-29	28.2298
2	GOTERM_CC_DIRECT	GO:0005859~muscle myosin complex	1874	-0.129584	1.40143e-28	1.40563e-25	24.8521
2	GOTERM_BP_DIRECT	GO:0030049~muscle filament sliding	2271	-0.118624	5.15258e-28	1.48703e-24	23.8277
2	GOTERM_BP_DIRECT	GO:0048739~cardiac muscle fiber development	1648	-0.125465	2.64582e-24	5.09056e-21	20.2932
2	GOTERM_BP_DIRECT	GO:0060048~cardiac muscle contraction	1787	-0.118238	3.39719e-23	4.90215e-20	19.3096
2	GOTERM_MF_DIRECT	GO:0008307~structural constituent of muscle	2413	-0.104551	4.07331e-23	7.37676e-20	19.1321
2	GOTERM_BP_DIRECT	GO:0045214~sarcomere organization	1863	-0.114074	2.05787e-22	1.97967e-19	18.7034
2	GOTERM_BP_DIRECT	GO:0006941~striated muscle contraction	1708	-0.118426	1.87365e-22	2.16295e-19	18.665
2	GOTERM_MF_DIRECT	GO:0005516~calmodulin binding	2270	-0.104855	3.08726e-22	2.79552e-19	18.5535
2	GOTERM_CC_DIRECT	GO:0031430~M band	1932	-0.110775	7.93962e-22	3.98172e-19	18.3999
2	SMART	SM00060:FN3	2096	-0.106985	9.21571e-22	5.2806e-19	18.2773
2	Motifs	WW domain binding motif	3827	0.0837819	1.46417e-20	7.9065e-19	18.102
2	GOTERM_CC_DIRECT	GO:0005865~striated muscle thin filament	1735	-0.114162	3.08001e-21	1.02975e-18	17.9873
2	Motifs	GSK-3, ERK1, ERK2, CDK5 substrate motif	3827	0.0837819	1.46417e-20	1.5813e-18	17.801
2	GOTERM_MF_DIRECT	GO:0097493~structural molecule activity conferring elasticity	1619	-0.117779	2.62702e-21	1.58584e-18	17.7997
2	SMART	SM00406:IGv	1651	-0.115786	5.74835e-21	1.6469e-18	17.7833
2	INTERPRO	IPR003961:Fibronectin	2103	-0.106701	1.04191e-21	2.1208e-18	17.6735
2	SMART	SM00409:IG	2151	-0.102775	1.34847e-20	2.57557e-18	17.5891
2	OMIM_DISEASE	type 2J	1544	-0.117221	2.43764e-20	2.60177e-18	17.5847
2	OMIM_DISEASE	613765~Cardiomyopathy	1544	-0.117221	2.43764e-20	2.78761e-18	17.5548
2	OMIM_DISEASE	1G	1544	-0.117221	2.43764e-20	3.00204e-18	17.5226
2	SMART	SM00408:IGc2	2130	-0.102636	2.135e-20	3.05839e-18	17.5145
2	OMIM_DISEASE	with fatal cardiomyopathy	1544	-0.117221	2.43764e-20	3.25221e-18	17.4878
2	OMIM_DISEASE	9	1554	-0.116427	3.44075e-20	3.4429e-18	17.4631
2	OMIM_DISEASE	tardive	1544	-0.117221	2.43764e-20	3.54787e-18	17.45
2	INTERPRO	type III	2104	-0.10683	9.14941e-22	3.72473e-18	17.4289
2	OMIM_DISEASE	611705~Myopathy	1544	-0.117221	2.43764e-20	3.90266e-18	17.4086
2	OMIM_DISEASE	limb-girdle	1700	-0.111699	4.45823e-20	4.1986e-18	17.3769
2	OMIM_DISEASE	with early respiratory muscle involvement	1544	-0.117221	2.43764e-20	4.33628e-18	17.3629
2	OMIM_DISEASE	proximal	1544	-0.117221	2.43764e-20	4.87832e-18	17.3117
2	GOTERM_BP_DIRECT	GO:0055003~cardiac myofibril assembly	1606	-0.11706	6.2144e-21	5.12422e-18	17.2904
2	GOTERM_MF_DIRECT	GO:0042805~actinin binding	1572	-0.117325	1.14787e-20	5.19697e-18	17.2842
2	GOTERM_BP_DIRECT	GO:0050790~regulation of catalytic activity	1592	-0.11728	7.34965e-21	5.30277e-18	17.2755
2	OMIM_DISEASE	familial hypertrophic	1544	-0.117221	2.43764e-20	5.57522e-18	17.2537
2	OMIM_DISEASE	608807~Muscular dystrophy	1544	-0.117221	2.43764e-20	6.50443e-18	17.1868
2	GOTERM_BP_DIRECT	GO:0035995~detection of muscle stretch	1559	-0.117377	1.51119e-20	6.70968e-18	17.1733
2	GOTERM_BP_DIRECT	GO:0030241~skeletal muscle myosin thick filament assembly	1553	-0.117914	1.1717e-20	6.76307e-18	17.1699
2	GOTERM_BP_DIRECT	GO:0030240~skeletal muscle thin filament assembly	1578	-0.11723	1.06761e-20	6.84697e-18	17.1645
2	GOTERM_BP_DIRECT	GO:0003300~cardiac muscle hypertrophy	1560	-0.11753	1.31586e-20	6.9047e-18	17.1609
2	GOTERM_BP_DIRECT	GO:0048769~sarcomerogenesis	1556	-0.117518	1.46319e-20	7.03796e-18	17.1526
2	INTERPRO	IPR013098:Immunoglobulin I-set	2136	-0.104154	5.31106e-21	7.2071e-18	17.1422
2	OMIM_DISEASE	600334~Tibial muscular dystrophy	1544	-0.117221	2.43764e-20	7.80531e-18	17.1076
2	INTERPRO	IPR013106:Immunoglobulin V-set	1655	-0.115207	8.18417e-21	8.32944e-18	17.0794
2	OMIM_DISEASE	603689~Myopathy	1544	-0.117221	2.43764e-20	9.75664e-18	17.0107
2	INTERPRO	IPR015129:Titin Z	1544	-0.117221	2.43764e-20	9.92362e-18	17.0033
2	GOTERM_BP_DIRECT	GO:0007076~mitotic chromosome condensation	1544	-0.117221	2.43764e-20	1.005e-17	16.9978
2	GOTERM_MF_DIRECT	GO:0005509~calcium ion binding	1996	-0.104755	3.54347e-20	1.06954e-17	16.9708
2	INTERPRO	IPR003599:Immunoglobulin subtype	2151	-0.102775	1.34847e-20	1.09792e-17	16.9594
2	INTERPRO	IPR004168:PPAK motif	1544	-0.117221	2.43764e-20	1.10262e-17	16.9576
2	INTERPRO	IPR007110:Immunoglobulin-like domain	2156	-0.10209	2.2247e-20	1.13209e-17	16.9461
2	GOTERM_MF_DIRECT	GO:0031433~telethonin binding	1599	-0.115076	3.26493e-20	1.18256e-17	16.9272
2	INTERPRO	IPR008266:Tyrosine-protein kinase	1662	-0.113707	2.20308e-20	1.28125e-17	16.8924
2	OMIM_DISEASE	early-onset	1547	-0.117684	1.60961e-20	1.2885e-17	16.8899
2	OMIM_DISEASE	604145~Cardiomyopathy	1544	-0.117221	2.43764e-20	1.30089e-17	16.8858
2	GOTERM_BP_DIRECT	GO:0055008~cardiac muscle tissue morphogenesis	1628	-0.114144	3.38722e-20	1.3034e-17	16.8849
2	KEGG_PATHWAY	hsa05410:Hypertrophic cardiomyopathy (HCM)	1753	-0.110147	4.85799e-20	1.35052e-17	16.8695
2	OMIM_DISEASE	dilated	1919	-0.108224	8.4767e-21	1.35712e-17	16.8674
2	INTERPRO	IPR003598:Immunoglobulin subtype 2	2130	-0.102636	2.135e-20	1.4486e-17	16.8391
2	GOTERM_BP_DIRECT	GO:0045859~regulation of protein kinase activity	1571	-0.114975	6.71041e-20	2.42078e-17	16.616
2	GOTERM_CC_DIRECT	GO:0000794~condensed nuclear chromosome	1551	-0.115007	1.04289e-19	2.61506e-17	16.5825
2	GOTERM_CC_DIRECT	GO:0031674~I band	1702	-0.109468	2.30742e-19	4.62869e-17	16.3345
2	GOTERM_MF_DIRECT	GO:0051015~actin filament binding	2043	-0.100754	4.11027e-19	1.06339e-16	15.9733
2	GOTERM_MF_DIRECT	GO:0043621~protein self-association	1578	-0.112005	4.95161e-19	1.12092e-16	15.9504
2	GOTERM_BP_DIRECT	GO:0051592~response to calcium ion	1591	-0.112101	3.47442e-19	1.17967e-16	15.9282
2	INTERPRO	IPR013783:Immunoglobulin-like fold	2371	-0.0948729	4.4641e-19	1.65212e-16	15.782
2	GOTERM_MF_DIRECT	GO:0051371~muscle alpha-actinin binding	1685	-0.108197	8.34639e-19	1.67948e-16	15.7748
2	KEGG_PATHWAY	hsa05414:Dilated cardiomyopathy	1761	-0.105337	1.58317e-18	2.20061e-16	15.6575
2	GOTERM_MF_DIRECT	GO:0002020~protease binding	1596	-0.110058	1.35376e-18	2.45165e-16	15.6105
2	GOTERM_CC_DIRECT	GO:0030018~Z disc	2875	-0.086788	1.74651e-18	2.91957e-16	15.5347
2	GOTERM_MF_DIRECT	GO:0005524~ATP binding	3280	-0.0819835	4.28814e-18	6.47152e-16	15.189
2	GOTERM_MF_DIRECT	GO:0004713~protein tyrosine kinase activity	1598	-0.108423	4.1322e-18	6.80311e-16	15.1673
2	GOTERM_BP_DIRECT	GO:0018108~peptidyl-tyrosine phosphorylation	1606	-0.105138	3.44696e-17	1.10533e-14	13.9565
2	GOTERM_MF_DIRECT	GO:0019899~enzyme binding	1867	-0.0964865	1.65521e-16	2.30583e-14	13.6372
2	GOTERM_BP_DIRECT	GO:0002576~platelet degranulation	1676	-0.0993033	5.10667e-16	1.55135e-13	12.8093
2	Motifs	ERK1,2 kinase substrate motif	3251	0.0733329	1.04865e-14	3.77515e-13	12.4231
2	GOTERM_MF_DIRECT	GO:0004672~protein kinase activity	1946	-0.0884248	1.51304e-14	1.95722e-12	11.7084
2	GOTERM_MF_DIRECT	GO:0004674~protein serine/threonine kinase activity	2205	-0.0824723	4.68274e-14	5.65362e-12	11.2477
2	GOTERM_MF_DIRECT	GO:0019901~protein kinase binding	2052	-0.0846444	5.52278e-14	6.2511e-12	11.204
2	GOTERM_CC_DIRECT	GO:0005576~extracellular region	1771	-0.088766	1.17564e-13	1.68453e-11	10.7735
2	GOTERM_CC_DIRECT	GO:0005737~cytoplasm	4364	0.0607016	3.03879e-12	3.80988e-10	9.41909
2	INTERPRO	IPR011009:Protein kinase-like domain	2257	-0.0768735	1.30604e-12	4.43073e-10	9.35352
2	INTERPRO	catalytic domain	2431	-0.0736367	2.66768e-12	8.35395e-10	9.07811
2	INTERPRO	IPR000719:Protein kinase	2200	-0.074216	1.20608e-11	3.5071e-09	8.45505
2	INTERPRO	active site	2379	-0.070873	2.45849e-11	6.67233e-09	8.17572
2	GOTERM_CC_DIRECT	GO:0005854~nascent polypeptide-associated complex	157	0.244721	7.18562e-11	8.00797e-09	8.09648
2	GOTERM_CC_DIRECT	GO:0030017~sarcomere	406	-0.151751	1.23807e-10	1.24179e-08	7.90595
2	SMART	SM01407:SM01407	158	0.241273	1.15533e-10	1.32401e-08	7.87811
2	GOTERM_BP_DIRECT	GO:0003231~cardiac ventricle development	157	0.244721	7.18562e-11	1.80328e-08	7.74394
2	INTERPRO	IPR016641:Nascent polypeptide-associated complex subunit alpha	157	0.244721	7.18562e-11	1.82829e-08	7.73795
2	GOTERM_BP_DIRECT	GO:0061384~heart trabecula morphogenesis	164	0.239164	7.64589e-11	1.83884e-08	7.73546
2	GOTERM_BP_DIRECT	GO:1901227~negative regulation of transcription from RNA polymerase II promoter involved in heart development	157	0.244721	7.18562e-11	1.88525e-08	7.72463
2	GOTERM_BP_DIRECT	GO:1901228~positive regulation of transcription from RNA polymerase II promoter involved in heart development	157	0.244721	7.18562e-11	1.97502e-08	7.70443
2	GOTERM_BP_DIRECT	GO:0048633~positive regulation of skeletal muscle tissue growth	179	0.228265	8.8828e-11	2.05086e-08	7.68806
2	GOTERM_BP_DIRECT	GO:2000138~positive regulation of cell proliferation involved in heart morphogenesis	157	0.244721	7.18562e-11	2.07377e-08	7.68324
2	INTERPRO	IPR002715:Nascent polypeptide-associated complex NAC domain	158	0.241273	1.15533e-10	2.76668e-08	7.55804
2	GOTERM_BP_DIRECT	GO:0048742~regulation of skeletal muscle fiber development	165	0.231959	2.4464e-10	5.431e-08	7.26512
2	GOTERM_CC_DIRECT	GO:0030016~myofibril	443	-0.138153	9.96098e-10	9.0826e-08	7.04179
2	SMART	SM00242:MYSc	386	-0.147331	1.08603e-09	1.03716e-07	6.98415
2	GOTERM_CC_DIRECT	GO:0016459~myosin complex	329	-0.158182	1.39206e-09	1.16353e-07	6.93422
2	INTERPRO	IPR027401:Myosin-like IQ motif-containing domain	385	-0.150047	5.61799e-10	1.2706e-07	6.89599
2	GOTERM_MF_DIRECT	GO:0042802~identical protein binding	2209	-0.066297	1.31201e-09	1.39767e-07	6.8546
2	INTERPRO	IPR001609:Myosin head	386	-0.147331	1.08603e-09	2.32696e-07	6.63321
2	INTERPRO	EF-hand binding site	598	-0.117734	1.83247e-09	3.55237e-07	6.44948
2	INTERPRO	IPR000048:IQ motif	598	-0.117734	1.83247e-09	3.72998e-07	6.42829
2	GOTERM_CC_DIRECT	GO:0005886~plasma membrane	2386	0.0618042	5.60225e-09	4.32235e-07	6.36428
2	Motifs	b-Adrenergic Receptor kinase substrate motif	1627	-0.0698976	1.74131e-08	4.70153e-07	6.32776
2	INTERPRO	motor domain	406	-0.140508	2.55551e-09	4.72885e-07	6.32524
2	GOTERM_BP_DIRECT	GO:0043403~skeletal muscle tissue regeneration	205	0.19666	2.33135e-09	4.98391e-07	6.30243
2	GOTERM_MF_DIRECT	GO:0003713~transcription coactivator activity	275	0.166362	5.34845e-09	5.38114e-07	6.26913
2	GOTERM_MF_DIRECT	GO:0003774~motor activity	334	-0.150826	5.97995e-09	5.69984e-07	6.24414
2	GOTERM_BP_DIRECT	GO:0010664~negative regulation of striated muscle cell apoptotic process	174	0.211153	3.30862e-09	6.82048e-07	6.16619
2	GOTERM_MF_DIRECT	GO:0000146~microfilament motor activity	259	-0.167597	1.1347e-08	1.02747e-06	5.98823
2	INTERPRO	IPR002928:Myosin tail	360	-0.14408	8.24441e-09	1.45926e-06	5.83587
2	GOTERM_BP_DIRECT	GO:0001895~retina homeostasis	30	0.476861	2.42677e-08	4.83011e-06	5.31604
2	GOTERM_BP_DIRECT	GO:0015031~protein transport	395	0.131204	4.02162e-08	7.73759e-06	5.11139
2	GOTERM_BP_DIRECT	GO:0016032~viral process	449	0.123063	4.29944e-08	8.00527e-06	5.09662
2	Motifs	BARD1 BRCT domain binding motif	171	-0.179488	6.18156e-07	1.33522e-05	4.87445
2	INTERPRO	SH3-like	304	-0.14474	9.69665e-08	1.579e-05	4.80162
2	INTERPRO	IPR004009:Myosin	304	-0.14474	9.69665e-08	1.64479e-05	4.78389
2	GOTERM_CC_DIRECT	GO:0005829~cytosol	5661	-0.0425105	2.98434e-07	2.13807e-05	4.66998
2	GOTERM_CC_DIRECT	GO:0032982~myosin filament	473	-0.111452	3.63378e-07	2.42979e-05	4.61443
2	GOTERM_BP_DIRECT	GO:0070527~platelet aggregation	68	0.294076	2.31962e-07	4.18402e-05	4.37841
2	GOTERM_BP_DIRECT	GO:0070374~positive regulation of ERK1 and ERK2 cascade	61	0.305156	3.69136e-07	6.45652e-05	4.19
2	GOTERM_MF_DIRECT	GO:0043130~ubiquitin binding	63	0.292197	7.53272e-07	6.49607e-05	4.18735
2	BIOCARTA	h_agrPathway:Agrin in Postsynaptic Differentiation	67	0.288869	4.58697e-07	0.000130729	3.88363
2	SMART	SM00015:IQ	422	-0.109786	2.1059e-06	0.000172383	3.76351
2	GOTERM_BP_DIRECT	GO:0006412~translation	237	0.149097	1.15738e-06	0.000196482	3.70668
2	Origin	HTP	7230	0.0326439	8.27605e-05	0.000248281	3.60506
2	OMIM_DISEASE	type 2F	14	0.544903	1.31699e-05	0.00117139	2.9313
2	GOTERM_CC_DIRECT	GO:0070820~tertiary granule	6	0.817327	1.8695e-05	0.00117194	2.93109
2	GOTERM_BP_DIRECT	GO:0055010~ventricular cardiac muscle tissue morphogenesis	138	-0.179528	7.27684e-06	0.00120005	2.9208
2	GOTERM_CC_DIRECT	GO:0001725~stress fiber	271	-0.120884	2.55052e-05	0.0015048	2.82252
2	GOTERM_CC_DIRECT	GO:0005819~spindle	107	0.188181	3.39779e-05	0.00179367	2.74626
2	GOTERM_MF_DIRECT	GO:0016887~ATPase activity	378	-0.103462	2.2572e-05	0.00185809	2.73093
2	GOTERM_CC_DIRECT	GO:0005769~early endosome	160	0.154311	3.35736e-05	0.00187079	2.72797
2	SMART	SM00165:UBA	66	0.240605	3.0597e-05	0.00219151	2.65926
2	GOTERM_CC_DIRECT	GO:0005826~actomyosin contractile ring	75	-0.221052	4.47362e-05	0.00224352	2.64907
2	GOTERM_CC_DIRECT	GO:0005868~cytoplasmic dynein complex	29	0.353841	4.70316e-05	0.00224632	2.64853
2	Motifs	Calmodulin-dependent protein kinase IV substrate motif	722	0.0677695	0.000154769	0.00238787	2.62199
2	Motifs	Casein kinase I substrate motif	1447	-0.0497957	0.000135325	0.00243585	2.61335
2	GOTERM_BP_DIRECT	GO:0006606~protein import into nucleus	40	0.319974	1.55658e-05	0.00249571	2.60281
2	OMIM_DISEASE	605637~Proximal myopathy and ophthalmoplegia	73	-0.228812	3.06667e-05	0.00258408	2.58769
2	INTERPRO	IPR027417:P-loop containing nucleoside triphosphate hydrolase	671	-0.0796743	1.73222e-05	0.00271225	2.56667
2	OMIM_DISEASE	type IIB	13	0.531923	4.15104e-05	0.00302083	2.51987
2	OMIM_DISEASE	resistance to	13	0.527974	4.73219e-05	0.00303049	2.51849
2	OMIM_DISEASE	611868~Prostate cancer	6	0.780611	4.35724e-05	0.00303302	2.51812
2	OMIM_DISEASE	611162~Malaria	13	0.527974	4.73219e-05	0.00315676	2.50076
2	OMIM_DISEASE	608634~Neuropathy	13	0.531923	4.15104e-05	0.00316468	2.49967
2	OMIM_DISEASE	606595~Charcot-Marie-Tooth disease	13	0.531923	4.15104e-05	0.00332291	2.47848
2	KEGG_PATHWAY	hsa04014:Ras signaling pathway	147	0.160089	3.68063e-05	0.00341072	2.46715
2	GOTERM_BP_DIRECT	GO:0007512~adult heart development	117	-0.184176	2.23049e-05	0.00347957	2.45847
2	GOTERM_MF_DIRECT	GO:0030898~actin-dependent ATPase activity	108	-0.182433	5.41413e-05	0.00426304	2.37028
2	INTERPRO	IPR026088:Niban-like	10	0.617244	3.01797e-05	0.00455044	2.34195
2	KEGG_PATHWAY	hsa04260:Cardiac muscle contraction	251	-0.118311	7.22199e-05	0.00501928	2.29936
2	KEGG_PATHWAY	hsa05143:African trypanosomiasis	16	0.452797	0.000108639	0.00503363	2.29812
2	GOTERM_BP_DIRECT	GO:1902176~negative regulation of oxidative stress-induced intrinsic apoptotic signaling pathway	19	0.444894	3.4187e-05	0.00519283	2.2846
2	GOTERM_BP_DIRECT	GO:0098901~regulation of cardiac muscle cell action potential	8	0.680072	3.92589e-05	0.00539529	2.26799
2	GOTERM_MF_DIRECT	GO:0043495~protein anchor	17	0.450135	7.31043e-05	0.00551633	2.25835
2	GOTERM_BP_DIRECT	GO:0010389~regulation of G2/M transition of mitotic cell cycle	8	0.680072	3.92589e-05	0.00552688	2.25752
2	GOTERM_BP_DIRECT	GO:1901725~regulation of histone deacetylase activity	8	0.680072	3.92589e-05	0.00566506	2.2468
2	KEGG_PATHWAY	hsa04370:VEGF signaling pathway	67	0.222416	0.000103281	0.0057424	2.24091
2	GOTERM_BP_DIRECT	GO:1902306~negative regulation of sodium ion transmembrane transport	8	0.680072	3.92589e-05	0.00581031	2.2358
2	Motifs	14-3-3 domain binding motif	2219	0.0382257	0.000458709	0.00619257	2.20813
2	GOTERM_BP_DIRECT	GO:0014898~cardiac muscle hypertrophy in response to stress	143	-0.159711	4.88319e-05	0.00655483	2.18344
2	GOTERM_CC_DIRECT	GO:0072562~blood microparticle	114	0.167167	0.000144901	0.00660615	2.18005
2	GOTERM_CC_DIRECT	GO:0005634~nucleus	3458	0.0348907	0.000174185	0.00759598	2.11942
2	GOTERM_CC_DIRECT	GO:0061673~mitotic spindle astral microtubule	7	0.656722	0.000203751	0.00851509	2.06981
2	Motifs	MDC1 BRCT domain binding motif	1028	0.0508854	0.000817412	0.00882805	2.05414
2	Motifs	Plk1 PBD domain binding motif	1028	0.0508854	0.000817412	0.00980894	2.00838
2	GOTERM_CC_DIRECT	GO:0030136~clathrin-coated vesicle	46	0.252949	0.000250383	0.0100454	1.99803
2	GOTERM_CC_DIRECT	GO:0043025~neuronal cell body	185	0.126462	0.000260675	0.010056	1.99757
2	GOTERM_BP_DIRECT	GO:0014823~response to activity	147	-0.153204	7.84154e-05	0.0102867	1.98772
2	GOTERM_MF_DIRECT	GO:0019871~sodium channel inhibitor activity	14	0.470577	0.00016794	0.0116977	1.9319
2	GOTERM_CC_DIRECT	GO:0016021~integral component of membrane	1290	0.0493958	0.000319404	0.0118653	1.92572
2	GOTERM_MF_DIRECT	GO:0034237~protein kinase A regulatory subunit binding	27	0.339343	0.000165582	0.0119947	1.92101
2	GOTERM_BP_DIRECT	GO:0060341~regulation of cellular localization	10	0.577499	9.48292e-05	0.0121634	1.91495
2	OMIM_DISEASE	612376~Leukemia	7	0.656722	0.000203751	0.0125463	1.90148
2	GOTERM_BP_DIRECT	GO:0060487~lung epithelial cell differentiation	14	0.485679	0.000102885	0.0126352	1.89842
2	GOTERM_BP_DIRECT	GO:0032731~positive regulation of interleukin-1 beta production	15	0.469563	0.000101721	0.0127638	1.89402
2	GOTERM_CC_DIRECT	GO:0044613~nuclear pore central transport channel	9	0.552644	0.000394253	0.0141227	1.85008
2	GOTERM_MF_DIRECT	GO:0019869~chloride channel inhibitor activity	15	0.447595	0.000211697	0.0141993	1.84773
2	INTERPRO	IPR008942:ENTH/VHS	42	0.281202	0.00010005	0.0145465	1.83724
2	Regulatory site process	cell adhesion, altered	18	0.395919	0.000331606	0.0145907	1.83592
2	GOTERM_BP_DIRECT	GO:2001028~positive regulation of endothelial cell chemotaxis	18	0.42335	0.000124067	0.014919	1.82626
2	Motifs	Chk1 kinase substrate motif	889	0.0513592	0.00157958	0.0155086	1.80943
2	Motifs	SHP1 phosphatase substrate motif	83	-0.161343	0.00173055	0.015575	1.80757
2	GOTERM_MF_DIRECT	GO:0003779~actin binding	1490	-0.047293	0.000241324	0.0156085	1.80664
2	SMART	SM00288:VHS	19	0.390931	0.000271558	0.0172892	1.76223
2	GOTERM_BP_DIRECT	GO:0038033~positive regulation of endothelial cell chemotaxis by VEGF-activated vascular endothelial growth factor receptor signaling pathway	16	0.444079	0.000147094	0.0173271	1.76127
2	Known site	+	7798	0.0200098	0.017447	0.017447	1.75828
2	GOTERM_CC_DIRECT	GO:0030055~cell-substrate junction	26	0.317277	0.000548574	0.017749	1.75083
2	GOTERM_CC_DIRECT	GO:0005905~clathrin-coated pit	59	0.211915	0.000515387	0.0178253	1.74896
2	GOTERM_CC_DIRECT	GO:0031901~early endosome membrane	60	0.209271	0.000543981	0.0181871	1.74024
