# Supplementary material for: Identification of a Resistance Exercise-Specific Signaling Pathway that Drives Skeletal Muscle Growth
Source: Research Square preprint supplement (doi:10.21203/rs.3.rs-4997138/v1), 2024-11-12
Supplement: Supplementary file 7 [file c3290b6e29ede8bf95855b08.xlsx]

## Sheet: Blazev - Post PhosR 
Uniprot	Gene Name	Site	Sequence	Peptide #		PhosR log2 Pre END Subject 1	PhosR log2 0 hr END Subject 1	PhosR log2 3 hr END Subject 1	PhosR log2 Pre RE Subject 1	PhosR log2 0 hr RE Subject 1	PhosR log2 3 hr RE Subject 1		PhosR log2 Pre END Subject 2	PhosR log2 0 hr END Subject 2	PhosR log2 3 hr END Subject 2	PhosR log2 Pre RE Subject 2	PhosR log2 0 hr RE Subject 2	PhosR log2 3 hr RE Subject 2		PhosR log2 Pre END Subject 3	PhosR log2 0 hr END Subject 3	PhosR log2 3 hr END Subject 3	PhosR log2 Pre RE Subject 3	PhosR log2 0 hr RE Subject 3	PhosR log2 3 hr RE Subject 3		PhosR log2 Pre END Subject 4	PhosR log2 0 hr END Subject 4	PhosR log2 3 hr END Subject 4	PhosR log2 Pre RE Subject 4	PhosR log2 0 hr RE Subject 4	PhosR log2 3 hr RE Subject 4		PhosR log2 Pre END Subject 5	PhosR log2 0 hr END Subject 5	PhosR log2 3 hr END Subject 5	PhosR log2 Pre RE Subject 5	PhosR log2 0 hr RE Subject 5	PhosR log2 3 hr RE Subject 5		PhosR log2 Pre END Subject 6	PhosR log2 0 hr END Subject 6	PhosR log2 3 hr END Subject 6	PhosR log2 Pre RE Subject 6	PhosR log2 0 hr RE Subject 6	PhosR log2 3 hr RE Subject 6		PhosR log2 Pre END Subject 7	PhosR log2 0 hr END Subject 7
A0A1B0GWH8	CLN3	S12	____MGGCAGSRRRFSDSEGEETVPEPRLPL	Peptide1		0.0686858	-0.819241	0.296543	0.0419464	-0.241238	-0.0780185																-0.262301	-0.647464	0.167299	-0.135579	-0.0287441	-0.191204																-0.356063	-0.705363
A0A2R8YD12	SERPINB6	S240	VSLPRFKLEESYDMESVLRNLGMTDAFELGK	Peptide2																							-0.096984	-0.420856	0.102173	-0.170509	-0.102052	0.180492		-0.303118	-0.466523	0.0416925	-0.250364	0.20154	-0.0470828		-0.137689	-0.515519	0.155151	-0.0636574	0.295298	0.0861291		-0.303756	-0.318077
A0A2R8YD12	SERPINB6	S107	TWVAEKTEGKIAELLSPGSVDPLTRLVLV	Peptide3									0.0165216	-0.0344921	0.105893	0.175253	0.237913	0.239347									-0.159666	-0.163616	-0.146209	0.0338184	-0.0359368	0.0483933		-0.105583	-0.175604	-0.0400984	-0.191055	0.0501727	-0.0900962		-0.229794	-0.301409	-0.249212	-0.225628	-0.376511	-0.248303		-0.425038	-0.116823
H3BPM9	HDGFRP3	S91	KKSYTSKKSSKQSRKSPGDEDDKDCKEEENK	Peptide4																0.381866	-0.0490557	1.22163	0.379097	0.446098	0.383051		0.997469	0.235173	1.3781	0.461498	0.455842	0.33699		0.578493	0.0342115	1.05018	0.387709	0.738232	0.501277									0.950597	-0.308553
A0A1X7SBR1	PRICKLE2	S751	RRFRPHRSRRSRRSRSD LHLASEREAISR	Peptide5																-0.790012	-0.290367	-0.263855	-0.179229	-0.11659	-0.291987																							-0.220048	-0.680594
Q00341	HDLBP	S11	_____MSSVAVLTQESFAEHRSGLVPQQIKV	Peptide6		-0.544149	0.0764195	-0.765055	-0.22745	0.128462	0.0408768									-0.275682	-0.517411	-0.0642926	-0.230051	-0.259612	-0.436077																-0.121697	-0.284249	-0.074004	-0.116171	-0.047619	-0.212487
Q00341	HDLBP	S35	VPQQIKVATLNSEEESDPPTYKDAFPPLPEK	Peptide7		0.160098	-0.36708	0.0106301	0.107881	0.108112	-0.0500872																							-0.022968	-0.300707	0.0276634	-0.144236	0.475961	-0.0151683									-0.123814	-0.165574
A0A024R571	EHD1	S470	VGKDKPTYDEIFYTLSPVNGKITGA KKEM	Peptide8									-0.0433487	-0.624984	0.0799596	-0.0974468	-0.0214657	0.0889107									-0.133375	-0.812458	-0.0982669	-0.337128	-0.264321	0.308837
A0A0G2JRN3	SERPI 1	S38	LAEDPQGDAAQKTDTSHHDQDHPTFNKITPN	Peptide9		-0.298944	-0.62526	-0.602792	-0.541602	-0.0951729	-0.360381									-0.273907	-0.319794	-0.0552921	-0.203768	-0.159189	0.141498		-0.347784	-0.769921	-0.137327	-0.416165	-0.881188	-0.526478
A0A024RAC6	TCEB3	S125	GDYQETWKATGSRSYSPDHRQKKHRKLSELE	Peptide10																-0.243697	-0.0345025	-0.401023	-0.31267	-0.409724	-0.333896		-0.033661	-0.137967	-0.264347	-0.354101	-0.414948	-0.343626		-0.423117	-0.123576	-0.397933	-0.598253	0.439196	-0.572114
P46379-3	BAG6	S99	LVERAPPQTHLPSGASSGTGSASATHGGGSP	Peptide11																														-0.316526	-0.179349	-0.324859	-0.177925	-0.0456996	-0.274694		-0.235292	0.346354	-1.02006	-0.148541	0.867071	-0.178395
P46379-3	BAG6	S104	PPQTHLPSGASSGTGSASATHGGGSPPGTRG	Peptide12		0.0605358	-0.236157	-0.182887	-0.247692	-0.242364	-0.146581									-0.41394	-0.0780706	-0.11304	-0.0333545	-0.0996742	-0.121747																-0.0377678	-0.311995	-0.410601	-0.449043	0.654242	-0.4568
P46379-3	BAG6	S106	QTHLPSGASSGTGSASATHGGGSPPGTRGPG	Peptide13																-0.145296	-0.128742	-0.371583	-0.0285879	-0.0322319	-0.291223		-0.196958	0.00960637	-0.25628	-0.113993	-0.171963	-0.0160625		-0.337282	-0.110721	-0.384505	-0.240548	0.179693	-0.0343567									-0.151941	-0.0420311
P46379-3	BAG6	S113	ASSGTGSASATHGGGSPPGTRGPGASVHDRN	Peptide14									-0.76046	-0.45117	-0.336761	-0.295557	0.00776646	-0.23368		-0.170604	-0.311601	-0.0827389	-0.168262	-0.0786384	-0.155952		-0.579065	-0.399017	-0.442354	-0.152677	0.0162236	-0.110888		-0.427839	-0.377493	-0.387849	-0.0969987	-0.033302	-0.164806		0.0422932	0.170921	0.144917	-0.180384	-0.273461	-0.180278		-0.436509	-0.687538
P46379-3	BAG6	S994	PLPEEPMEVQGAERASPEPQRE SPAPGTT	Peptide15		0.304952	0.537688	0.26263	0.0734525	0.250632	0.06734		0.270188	0.148469	0.165116	0.145193	0.172108	0.205334		0.170393	0.273765	0.11399	0.245722	0.204898	0.0928638		0.219964	0.35979	0.199217	0.235599	0.203844	0.293916		0.241608	0.113755	0.166289	0.131807	0.328461	0.180076		0.363503	0.144643	0.0188505	0.151207	0.62923	0.368345		0.305782	0.226923
P46379-3	BAG6	S1003	QGAERASPEPQRE SPAPGTTAEEAMSRGP	Peptide16																0.026032	0.0764459	0.151262	0.18172	0.0867057	0.0507948		0.0297369	0.057948	-0.00722825	0.038736	0.072653	0.069713		-0.0603106	-0.0313672	-0.0167933	-0.0621846	0.270403	0.0127536									-0.187194	-0.0198126
P46379-3	BAG6	S1147	LRSDIQKRLQEDPNYSPQRFP QRAFADDP	Peptide17		-0.248004	-0.590349	-0.235304	0.0685651	0.131307	0.0398458																							-0.209665	-0.494288	-0.191037	-0.548596	0.337742	-0.103757									-0.0936419	-0.62157
A0A075B6G3	DMD	S2437	AKQPDLAPGLTTIGASPTQTVTLVTQPVVTK	Peptide18									-1.30788	-1.5512	-1.30267	-0.914225	-1.14595	1.05498		-1.19167	0.130994	-1.31374	-0.986334	-1.17138	0.40551		-1.61663	-1.22656	-1.60715	-1.13182	-1.0348	2.24267		-1.82246	-1.68496	-1.79023	-1.10041	-0.507552	1.97896		-1.22409	-0.856768	-1.39836	-1.50894	-0.116296	0.599731		-1.33069	-0.890295
A0A075B6G3	DMD	S2993	VKALRGEIAPLKENVSHVNDLARQLTTLGIQ	Peptide19		-0.133961	0.202631	0.207797	-0.12563	0.151024	0.00128986									0.170317	0.343298	0.147243	0.313945	0.233101	0.224685		0.033769	0.0560877	-0.103326	0.0251255	-0.102217	0.152183		0.0718907	0.0977885	0.0266493	-0.0145979	-0.187338	0.184966									0.0160041	0.0651138
A0A075B6G3	DMD	S3549	KGLSPLPSPPEMMPTSPQSPRDAELIAEAKL	Peptide20																							-0.596081	-0.629721	-0.708373	-0.50627	0.0184048	0.734887		-0.621549	-0.580145	-0.257335	-0.83743	0.232026	0.00991948
A0A075B6G3	DMD	S3442	QLSHDDTHSRIEHYASRLAEMENSNGSYLND	Peptide21		-0.125044	0.852101	-0.679248	-0.910509	0.128393	-0.194184									0.00826203	0.331222	-0.528672	0.0816496	0.383434	0.0690301		0.0768224	0.165308	-0.384209	-0.276184	0.788402	-0.0675084		-0.159813	0.439152	-0.348801	-0.0246876	0.0953667	0.157868									-0.0288194	0.349659
A0A075B6G3	DMD	S1758	ANRGDHCRKLVEPQISELNHRFAAISHRIKT	Peptide22																							-0.548844	-0.125103	-0.297755	-0.23488	-0.244412	0.0911393		-0.304834	-0.618017	-0.161568	-0.446687	-0.118215	-0.121983
A0A075B6G3	DMD	S3623	GTTVSSPSTSLQRSDSSQPMLLRVVGSQTSD	Peptide23		0.152198	-0.263943	0.104487	0.0392667	0.450183	0.31654		0.327557	0.0669155	0.25166	0.212966	0.364322	0.427008		-0.0289036	-0.11879	-0.205187	0.0443789	0.38213	-0.00598964		0.399549	-0.0102098	0.192686	-0.0128737	0.529756	0.227791		0.265756	0.0903928	-0.005471	0.183957	0.355899	0.248425		-0.060709	0.1511	0.305119	-0.0106909	0.621539	-0.142626		0.233283	0.172345
A0A075B6G3	DMD	S3624	TTVSSPSTSLQRSDSSQPMLLRVVGSQTSDS	Peptide24		0.0517184	0.143951	0.129719	0.0840592	0.342655	0.223784		0.320128	0.573406	0.314116	0.195295	0.423739	0.128216		0.0556028	0.0625611	-0.127614	0.06956	0.362384	0.0480197		0.474761	0.154706	0.2215	-0.0237474	0.565012	0.238517		0.336516	0.331147	0.0366749	0.224327	0.332647	0.218177		0.0235034	0.280883	0.269237	-0.00390396	0.521364	-0.0360531		0.242102	0.227098
A0A075B6G3	DMD	S332	FPSQHLEAPEDKSFGSSLMESEVNLDRYQTA	Peptide25																-0.184979	-0.109603	-0.230333	0.0771555	-0.244921	0.126044									-0.348087	-0.41527	-0.217265	-0.172072	-0.261075	-0.0179779
A0A075B6G3	DMD	S333	PSQHLEAPEDKSFGSSLMESEVNLDRYQTAL	Peptide26		0.22553	-0.325255	0.210807	0.134586	-0.123754	0.244548		-0.121857	-0.273218	-0.147373	-0.0336309	-0.241955	0.0868744		0.02489	-0.388194	0.0378637	0.0965374	-0.182896	0.118602		0.069545	-0.328989	-0.0390348	0.0411797	-0.140212	0.15049		-0.075048	-0.244225	-0.106222	-0.15403	0.0338679	0.130492		0.0156375	-0.105939	0.160563	0.14779	0.179071	0.162784		-0.186182	-0.377266
A0A075B6G3	DMD	S3490	YCQSLNQDSPLSQPRSPAQILISLESEERGE	Peptide27									-1.04355	-0.576337	-0.729771	-1.20018	-0.575354	0.348639									-1.35391	-0.897925	-1.69987	-0.714602	-0.29068	1.85777		-1.25826	-0.66178	-1.50283	-1.05095	-0.419772	1.91625		-0.570485	-0.377873	-0.846422	-0.455518	-0.20031	0.749765
A0A075B6G3	DMD	S3500	LSQPRSPAQILISLESEERGELERILADLEE	Peptide28									-0.207711	-0.359246	-0.162496	-0.36213	0.200683	0.516067		-0.671225	-0.519127	-0.807022	-0.755105	-0.253747	0.0183517		-0.813856	-0.295094	-0.612812	-0.587703	0.69662	1.36834		-0.700284	-0.447963	-0.62479	-0.731229	0.65094	0.954772		-0.569735	-0.208571	-0.643125	-0.542042	1.05405	0.454608		0.113933	-0.418834
A0A075B6G3	DMD	S319	AAYVTTSDPTRSPFPSQHLEAPEDKSFGSSL	Peptide29																-0.458666	-0.272223	-0.11666	-0.262111	-0.070634	-0.246046		-0.198703	-0.301435	0.21062	-0.323946	0.0269	-0.4996		-0.231142	-0.384815	-0.213132	-0.285613	0.338467	-0.224572									-0.182221	-0.378466
A0A075B6G3	DMD	S1308	ENIPGGAEEISEVLDSLENLMRHSEDNPNQI	Peptide30																																					-0.340504	-0.458538	-0.260049	-0.112087	0.0242447	-0.108517		-0.660581	-0.856864
A0A075B6G3	DMD	S1442	MKKHNQGKEAAQRVLSQIDVAQKKLQDVSMK	Peptide31									0.569036	0.376725	0.821532	0.537638	0.674626	0.696293		0.17349	-0.21729	0.58792	-0.0989069	-0.00947883	0.339769		0.477204	0.169578	0.627985	0.38624	0.738201	0.660238		0.444658	0.05046	0.541644	0.320357	0.423385	0.867772		0.263772	-0.0254582	0.488546	0.199648	0.438345	0.366963		0.405501	0.028457
A0A075B6G3	DMD	S3613	EQPQAEAKVNGTTVSSPSTSLQRSDSSQPML	Peptide32		-0.44362	-0.403568	-0.609745	-0.702667	1.56061	0.245662									-0.252225	0.768509	-0.557133	-0.258429	-0.212825	0.4348		-0.919768	-0.450463	-1.06317	-0.395474	0.305229	1.64284		-0.919266	-0.700822	-1.01158	-0.580623	0.296169	1.68109									0.130608	-0.704595
A0A075B6Q2	FNBP1L	S347	RHSSDINHLVTQGRESPEGSYTDDANQEVRG	Peptide33		0.433037	0.0125844	-0.0551375	0.434232	0.323475	0.0910113									0.41734	-0.20025	0.514112	0.138736	0.109474	0.456707		0.156299	-0.128451	0.457354	-0.000981589	0.0678271	0.101257		0.23237	-0.130921	0.379214	-0.0293154	0.337834	-0.110656									0.241162	0.142145
A0A075B6Q2	FNBP1L	S351	DINHLVTQGRESPEGSYTDDANQEVRGPPQQ	Peptide34																																												-0.639006	-0.271513
A0A075B6Q2	FNBP1L	S334	SEVEGKTGGRGDRRHSSDINHLVTQGRESPE	Peptide35		-0.304512	-0.115836	0.128746	-0.485222	-0.249579	-0.402614																-0.251401	-0.35199	-0.411462	-0.152916	-0.197926	-0.0412454		-0.374707	-0.220472	-0.727693	-0.192561	0.025887	0.097642									-0.195238	-0.172257
A0A075B6Q2	FNBP1L	S141	DFPFEDYSQHIYRTISDGTISASKQESGKMD	Peptide36									0.314709	0.837576	0.617903	0.427094	0.686323	0.353259																0.199109	0.365613	0.231186	0.00373477	0.340927	0.325621									0.0791972	0.409615
A0A075B730	EPPK1	S2693	ERLSKVSFRGLRRQVSASELHTSGILGPETL	Peptide37		-0.334677	-1.25706	-0.564519	0.0146478	-0.421265	-0.170921		-0.439928	-0.907749	-0.322575	-0.409721	0.457334	-0.315709		-0.99365	-0.96835	-0.365914	-0.856112	-0.588593	-0.408491									-0.265344	-0.583657	-0.573308	-0.672817	-0.00802972	-0.233531		-0.575243	-0.261806	-0.145794	-0.188474	-0.219824	-0.672622		0.167716	-1.17077
A0A0A0MRM1	PDE4DIP	S1919	NRVLREDNRRLQAQLSHVSREHSQETESLRE	Peptide38																																												-0.733983	-0.297929
A0A0A0MRM1	PDE4DIP	S2113	TDPGNKQLLLQDSAVSPPVRDVGMNSPALVF	Peptide39																							-0.501274	-0.757663	-0.45481	-0.621214	-0.357448	-0.315998									-0.335423	-0.56077	-0.446708	-0.280694	0.139639	-0.202529
A0A0A0MRM1	PDE4DIP	S1321	MVLMEGLCSEQGRRGSTLASSSERKPLENQL	Peptide40																														0.160611	-0.10486	-0.204557	0.305334	-0.419074	0.280663									-0.559708	0.102278
A0A075B785	KIAA1468	S170	AAGVGGAGGREPSTASGGGQLNRAGSISTLD	Peptide41																-0.364471	-0.514288	-0.472598	-0.474068	-0.321152	-0.362097									-0.480143	-0.747716	-0.511713	-0.324846	0.231892	-0.402053
A0A087WXA6	GRIPAP1	S271	REKESSAVPARSLSSSPQAQPPRPAELSDEE	Peptide42																							-0.19415	0.0123949	-0.27961	-0.171465	-0.193268	0.0394553		-0.41055	-0.366006	-0.408479	-0.331128	0.602788	-0.336157
A0A075B7B1	SYNM	S161	AAHERDVRELRARAASLTMHFRARATGPAAP	Peptide43									0.11377	-0.183051	-0.0552216	0.0278049	-0.151166	-0.0512662																-0.060817	-0.471174	-0.176868	-0.0547409	-0.51395	0.278058									-0.167608	-0.28995
A0A075B7B1	SYNM	S379	PLASFNHSSALYSNLSGHRGSQTGTSIGGDA	Peptide44																-0.19449	-0.0581347	-0.0604826	-0.069248	0.131017	-0.726679
A0A075B7B1	SYNM	S384	NHSSALYSNLSGHRGSQTGTSIGGDARRGFL	Peptide45									-0.144338	-0.421586	0.148798	0.0693984	0.0658559	-0.134399		-1.00239	-0.275481	-1.25154	-0.92309	-0.0266187	-1.23122		-0.598898	-0.301902	-0.572636	-0.0385539	0.280569	-0.881407		-0.111941	0.248933	-0.997989	0.119739	-0.751688	-0.34134		-0.832355	-0.225335	-0.640316	-0.348198	-0.15514	-1.05257		-0.403605	-0.388517
A0A075B7B1	SYNM	S1038	EASEMEKAVESVVRESLSRQRSPAPGSPDEE	Peptide46		-0.350436	-0.0503632	0.000440664	-0.568034	-0.647418	0.167919		-0.00428249	0.107918	-0.176822	-0.268847	-0.129441	-0.16293									-0.0761183	-0.153207	-0.173665	-0.325988	-0.130802	-0.175912		-0.0214871	-0.147014	-0.252542	-0.168199	-0.279159	-0.110698		-0.427343	-0.0269848	-0.102697	-0.0881434	-0.20091	-0.555046		-0.207508	0.0910803
A0A075B7B1	SYNM	S1077	GIRFRRWATRELYIPSGESEVAGGASHSSGQ	Peptide47		-0.0551872	-0.579264	-0.0517233	-0.0152997	0.227045	0.0915277		-0.140281	-0.438751	0.0293798	-0.0659789	0.140702	-0.110634		-0.350652	-0.300998	-0.241576	0.121004	0.00301911	-0.0714721		-0.336104	-0.321156	-0.202528	-0.171838	0.465986	0.0837035		-0.0360592	-0.231028	-0.0393017	-0.275334	0.0850986	0.00012474		0.008834	-0.0221816	0.0493386	-0.151748	0.197889	-0.266242		0.52762	-0.497426
A0A075B7B1	SYNM	S1080	FRRWATRELYIPSGESEVAGGASHSSGQRTP	Peptide48		-0.87094	-1.27312	-0.402477	-0.202366	-0.0218724	0.0974616		-0.0468717	-0.623657	0.0184138	-0.204068	-0.114013	-0.30093									-0.242647	-0.796241	-0.148071	-0.262844	-0.29068	-0.156152																-0.151186	-0.868626
A0A075B7B1	SYNM	S1087	ELYIPSGESEVAGGASHSSGQRTPQGPVSAT	Peptide49		0.37357	0.174777	-0.00327315	0.250215	-0.0932043	0.267069		-0.176147	-0.159892	0.0203308	0.0977864	-0.118801	-0.101793		-0.0784608	0.0652354	0.138609	0.185111	0.38536	0.336472									0.0476755	-0.116323	0.0508593	-0.0857993	-0.0527617	0.281551		0.132933	0.21907	-0.0297833	0.241257	0.435342	0.045199
A0A075B7B1	SYNM	S1089	YIPSGESEVAGGASHSSGQRTPQGPVSATVE	Peptide50																-0.18043	-0.67276	-0.0828947	-0.129096	-0.483641	-0.16889									-0.48565	-0.878335	-0.172045	-0.513136	-0.0732058	-0.454096		-0.533767	-0.633286	-0.392952	-0.344425	0.223322	-0.334491
A0A075B7B1	SYNM	S1090	IPSGESEVAGGASHSSGQRTPQGPVSATVEV	Peptide51									-0.132855	-0.500704	0.100254	-0.109966	0.00691698	-0.103992																														-0.440509	-0.910321
A0A075B7B1	SYNM	S584	EKSVREREVPISLEVSQDRRAEVSPKGLQTP	Peptide52																														-0.114129	-0.296644	-0.00982494	-0.461798	-0.200358	-0.305504									-0.356997	-0.279436
A0A075B7B1	SYNM	S465	KAGDTREVPVYIGEDSTIARESYRDRRDKVA	Peptide53									0.772929	-0.0811444	0.246978	0.0379155	-0.140283	-0.857584		-0.215878	-0.600811	-0.401705	-0.680772	-0.56192	-0.633978									0.0525603	-0.277909	0.255387	-0.462127	-0.371006	-0.38468
A0A075B7B1	SYNM	S471	EVPVYIGEDSTIARESYRDRRDKVAAGASES	Peptide54									0.0895942	0.286754	0.0626747	0.235911	-0.0454264	0.16352		-0.142555	0.275636	0.0515902	0.0960062	0.00953289	0.0454859									0.268066	0.269742	0.0746069	0.0677108	-0.444922	0.19667									-0.0442299	0.217581
A0A075B7B1	SYNM	S936	TVIEKEIKIPHEFHTSMKGISSKEPRQQLVE	Peptide55		-0.766587	-0.456324	0.348166	-0.246458	-0.441652	-0.0562352
A0A075B7B1	SYNM	S628	ARELRFRLGTSDATGSLQGDSMTETVAENIV	Peptide56									-0.241155	-0.722101	-0.242	-0.555813	0.643713	-0.766564		-0.513913	-0.599695	-0.522954	-0.654714	0.81561	-0.716004		-1.02742	-0.592533	-0.435757	-0.52415	1.05079	-0.470421		-0.346819	-0.47573	-0.357899	-0.593168	0.10775	-0.404294		-0.671855	-0.270316	-0.677702	-0.440436	0.29984	-0.527777		-0.573163	-0.396946
A0A075B7B1	SYNM	S1141	HIKLGPSEVWRTERMSYEGPTAEVVEMDVSN	Peptide57																-0.486262	0.0166014	-0.545621	-0.613677	0.967342	-0.558125		-0.547137	-0.507497	-0.255349	-0.235867	-0.189726	-0.302674		-0.65331	-0.0284649	-0.801565	-0.610091	0.0281805	0.00759901		-0.728136	0.25341	-0.763909	-0.381044	0.234188	-0.587659		-0.425555	-0.563834
A0A075B7B1	SYNM	S653	VAENIVTSILKQFTQSPETEASADSFPDTKV	Peptide58		-0.504285	-0.946499	-0.227518	-0.382198	0.290174	0.962972		-0.330382	-0.345385	0.221092	0.467972	0.157665	1.37572		-1.03182	0.0589806	-0.719472	-0.906609	-0.6547	0.701877		-0.635586	-0.296358	-0.152508	-0.498619	-0.11081	2.55064		-0.457363	-0.263172	-0.43245	-0.27376	-0.311594	2.02365		-0.804071	-0.234401	-0.347431	-0.8267	0.576656	1.24816		0.0446326	-0.498365
A0A075B7B1	SYNM	S824	QENTTHVEEVTEAGDSEGEQSYFVSTPDEHP	Peptide59		0.0807967	-0.15498	0.101155	0.187767	0.152948	0.212116		-0.0648672	-0.229777	-0.0142331	-0.0259706	0.0377282	-0.0375425		0.0682901	-0.182408	0.226722	0.139064	0.136295	0.124303		-0.112838	-0.20894	0.0939647	0.0976601	0.122897	-0.0377597		-0.0755269	-0.064852	0.0301149	0.0130911	0.125495	0.000445933		0.100197	0.105476	0.232516	0.139703	0.0218482	0.0273188		0.0371287	-0.193044
A0A075B7B1	SYNM	S829	HVEEVTEAGDSEGEQSYFVSTPDEHPGGHDR	Peptide60									-0.142654	-0.18685	0.098726	0.363678	-0.0292374	0.6603									-0.343414	-0.233408	-0.18032	0.00288191	-0.113834	0.458108		-0.442086	-0.281061	0.0628291	-0.130889	-0.187952	0.324947
A0A075B7B1	SYNM	S1044	KAVESVVRESLSRQRSPAPGSPDEEGGAEAP	Peptide61		0.0435719	-0.159012	0.0753552	0.305138	0.185537	0.458873									0.193339	-0.0794313	0.359813	0.106913	-0.411288	0.294243		0.170302	-0.422666	0.353701	0.0427858	-0.32309	0.303602		0.0179996	-0.25949	0.0895677	0.0586765	0.0289546	0.097184									0.338567	-0.676708
A0A075B7B1	SYNM	S1049	VVRESLSRQRSPAPGSPDEEGGAEAPAAGIR	Peptide62		-0.852442	-0.243473	-0.411936	-0.527728	0.893613	0.545718		-0.523629	-0.144567	-0.342378	-0.377684	0.271797	0.698836		-0.372744	0.178163	-0.232818	-0.296653	-0.0776955	0.424164		-0.489662	-0.391619	-0.368179	-0.367236	0.158128	0.96789		-0.340612	-0.271485	-0.27797	-0.338756	-0.0478321	0.907531									0.0304856	-0.258562
A0A075B7B1	SYNM	S913	LEGDLGSTHWKEQARSGEFHAEPTVIEKEIK	Peptide63									-0.377496	0.00404296	-0.0555201	-0.398745	-0.153115	-0.331923		-0.259129	0.0160378	-0.0678986	-0.447985	0.192902	-0.194433																							-0.299721	-0.395828
A0A075B7B1	SYNM	S1228	MFDKKVQLQRMVDQRSVISDEKKVALLYLDN	Peptide64		-0.412981	-0.731159	-0.565354	-0.112373	-0.100464	0.10323																																					-0.0474559	-0.164756
A0A075B7B1	SYNM	S347	NMPSEFRNKSYHYTDSLLQRENERNLFSRQK	Peptide65		-0.201183	-1.05826	-0.480963	-0.485216	-0.280904	-0.0400372		-0.390791	-1.22954	-0.155248	-0.388647	-0.118038	-0.449979																							-0.396178	-0.57489	-0.407001	-0.221461	-0.375551	-0.295815
A0A075B7B1	SYNM	S429	SYGKAVSSQTNVRTFSPTYGLLRNTEAQVKT	Peptide66		0.427522	-0.147251	0.108585	0.478784	0.455142	0.421372									0.682198	0.36947	0.614244	0.532289	0.479355	0.250763		-0.0776196	-0.491978	-0.0419737	-0.127843	0.0350905	-0.00346144		0.169296	-0.332707	0.186701	0.0573136	-0.372654	0.091878		0.455141	0.119485	0.361274	0.469689	-0.0585237	0.149932		-0.0770895	-0.293326
A0A075B7B1	SYNM	S1106	GQRTPQGPVSATVEVSSPTGFAQSQVLEDVS	Peptide67																-0.50805	0.128064	0.1632	-0.317228	0.361073	0.785835		-1.15389	-1.60544	-1.31439	-0.534474	0.774496	1.16143									-0.0556938	-0.380667	0.17095	0.240797	0.125196	0.240744		-0.426633	-0.701323
A0A075B7B1	SYNM	S1107	QRTPQGPVSATVEVSSPTGFAQSQVLEDVSQ	Peptide68																							-1.05041	-1.08728	-1.04083	-0.619871	0.242554	0.522455									-0.582616	-0.570284	-0.625385	-0.423404	0.0231508	0.442281		-0.599079	-0.811049
A0A087WT47	TNNI1	S58	RYLAERIPTLQTRGLSLSALQDLCRELHAKV	Peptide69		0.0740585	0.400938	-0.454628	0.350033	0.298172	1.0651		1.10861	-0.336967	0.241237	0.632659	-0.71154	-0.443196		1.73582	-0.295623	0.168562	0.0713855	-0.725198	-0.560819		0.114538	0.478818	0.537752	-0.0590565	-0.356704	0.246818		0.41099	-0.0262368	0.4609	-0.0833497	0.119623	-0.355219		0.380542	0.465559	-0.012698	0.0157222	0.611462	0.284721		0.445311	1.01091
A0A087WT47	TNNI1	S60	LAERIPTLQTRGLSLSALQDLCRELHAKVEV	Peptide70		0.074247	0.535143	-0.537357	0.352375	0.283349	0.977523		1.1959	-0.478362	0.65339	0.749022	-0.69898	-0.0277297		1.40337	-0.164355	-0.0624488	0.286442	-0.356395	-0.41638		0.276473	0.651345	0.220061	0.101469	-0.0411766	0.308397		0.303144	0.331824	0.0909999	0.283715	0.0248651	0.0780999		0.405804	0.489764	-0.0681087	0.11089	0.504443	0.190921		0.464504	0.961242
A0A087WT47	TNNI1	S135	ADAMLRALLGSKHKVSMDLRANLKSVKKEDT	Peptide71		-0.241844	-0.239801	-0.061022	-0.10692	0.127746	0.501621		1.75827	-0.319108	0.972424	0.786217	-0.410068	-0.451296		1.40952	-0.651869	0.203616	-0.366254	-0.667579	-0.812547		0.239299	0.243268	1.2216	-0.154951	-0.167917	0.14471		0.839026	-0.26384	1.09057	-0.139014	0.133365	-0.608321									0.664821	0.739853
A0A087WT47	TNNI1	S119	LRGKFKRPPLRRVRVSADAMLRALLGSKHKV	Peptide72																							-0.166953	-0.160302	-0.0577754	-0.422627	-0.245107	0.324969		-0.225523	-0.474808	0.104309	-0.436503	-0.217812	-0.1009									-0.249892	-0.179348
A0A087WV45	TTR	S72	ADDTWEPFASGKTSESGELHGLTTEEEFVEG	Peptide73																														0.00697675	-0.815666	0.310862	-0.298705	0.228378	0.255325		-0.0738185	-0.236588	0.317438	0.123751	0.322121	0.0443605		0.238527	-0.634929
A0A1B0GVT0	PLCB1	S70	LSLSSDPGKVNHKTPSSEELGGDIPGKEFDT	Peptide74									0.419217	-0.0431738	0.360072	0.0329414	0.177703	0.291161																-0.22018	-0.109359	0.125429	-0.046217	-0.282104	0.168508
A0A087X0W7	ACOT2	S232	SHPEVKGPGVGLLGISKGGELCLSMASFLKG	Peptide75		0.69102	0.605148	0.193838	0.467135	0.309579	0.233789		-0.086399	0.397504	0.0412045	0.437197	0.0309239	0.297876		0.770117	0.356657	0.66581	0.578882	0.42155	0.409892		0.316717	0.205904	0.458106	0.236253	0.185064	0.359475		0.159646	0.241185	0.489902	0.285934	0.169064	0.397935		0.441667	0.404707	0.528428	0.382375	0.19142	0.368513		0.348675	0.364736
A0A087WTB8	UCHL3	S94	SGSTLKKFLEESVSMSPEERARYLENYDAIR	Peptide76		0.340866	0.567947	0.0941214	0.214986	0.316136	0.293111		0.336201	0.28296	0.333226	0.134044	0.0938474	0.36369		0.63543	0.111571	0.35125	0.317031	0.120956	0.255705		0.4318	0.215421	0.467276	0.138086	0.343843	0.22218		0.414901	0.146973	0.100094	0.416476	0.323659	0.150469		0.232948	0.357716	0.179039	0.0735303	0.57974	0.290107		0.366552	0.321806
A0A087WTD7	AKAP13	S545	GNDENMSNTWKFLSHSTDSLNKISKVNESTE	Peptide77		0.729256	-0.333433	0.375419	0.571898	-0.162466	0.46907		0.300829	0.132539	0.460834	0.590378	0.278919	0.401964																0.232897	-0.192674	0.398579	0.241063	0.523176	0.405364		0.385084	0.105987	0.414227	0.399222	0.748603	0.35381		-0.0199464	0.12569
A0A087WTD7	AKAP13	S492	VIMRNKPSQPKERPRSAVLLVDETATTPIFA	Peptide78									0.502906	0.981508	0.423747	0.397821	0.699688	0.588136		-0.13442	-0.491744	-0.195341	-0.425066	-0.136117	-0.293229		0.440173	0.147078	0.43632	0.480673	0.624318	0.459654		0.448775	-0.114133	0.232926	0.452437	0.597547	0.329896		-0.165532	-0.200442	0.0905882	-0.0360628	0.774028	0.100149		0.240457	-0.0579661
A0A087WTD7	AKAP13	S1336	EEPPSPSAPSIAKSGSLDSELSVSPKRNSIS	Peptide79									0.318424	-0.400827	0.459586	-0.416812	0.231828	-0.201488		-0.324885	-0.213656	-0.168225	-0.506256	0.10728	-0.413242									-0.157617	-0.0357531	-0.0858113	-0.354649	0.382603	-0.421646
A0A087WTD7	AKAP13	S263	HPFSGEERVDSLVSLSEEDLESDQREHRMFD	Peptide80									-0.390303	-1.20433	-0.499801	0.121384	-0.0510458	-0.249897																							-0.441737	-0.686602	-0.362566	-0.473138	-0.174959	-0.248283
A0A087WX12	KIZ	S400	ANKIASEASFSSSEGSPLSRHENKKKPVINL	Peptide81																																					-0.148572	-0.655446	0.0115716	-0.151425	1.05492	-0.415257		-0.789791	-0.855076
A0A087WTL4	BCL2L13	S396	TETLLSEKEI REESLVEELSPASEKKPVP	Peptide82																														-0.225602	-0.700047	0.516339	-0.830051	0.126157	-0.860415		-0.293367	-0.462504	-0.578582	-0.0845473	0.796251	0.210383
A0A087WTL4	BCL2L13	S402	EKEI REESLVEELSPASEKKPVPPSEGKS	Peptide83		-2.21763	-1.92281	-1.87696	-1.96686	1.53285	1.9439		-1.19611	-2.00908	-1.15232	-0.0830778	-0.719573	1.29118		-1.95159	-0.100347	-1.85492	-1.76265	-2.02321	0.187453		-1.62784	-1.43894	-1.40456	-0.758278	-1.09738	2.78019		-1.85531	-1.67967	-1.83607	-1.33644	-0.6471	2.41311		-1.50797	-1.28128	-1.46708	-1.96393	0.97088	0.827671		-1.15838	-1.337
A0A087WTL4	BCL2L13	S281	DSNGAGEKSENNSSNSDIVHVEKEEVPEGME	Peptide84		0.514257	0.457195	0.474514	0.253954	0.252699	0.081192									0.373234	0.42096	0.63441	0.481531	0.251367	0.539853									-0.0303871	0.152475	0.102139	-0.200096	0.530477	-0.173187									-0.0374369	0.354916
A0A087WTL4	BCL2L13	S346	LGTREPDTEVITVEKSSPATSLFVELDEEEV	Peptide85																0.403338	-0.853714	-0.322697	0.266297	-0.324956	-0.0589466		0.095146	-0.858033	0.071007	-0.10261	-0.478832	0.479477		-0.489642	-1.48474	-0.57318	-0.277383	1.05333	0.248294		-0.0299972	-0.748325	-0.0685607	-0.142782	1.6697	-0.000246056
A0A087WTP2	FDPS	S22	SDVYAQEKQDFVQHFSQIVRVLTEDEMGHPE	Peptide86																							-0.275219	-0.653301	-0.3451	-0.366347	-0.171889	-0.221752		-0.622619	-0.508371	-0.24289	-0.4201	-0.254454	-0.425221
E7EQ49	WDR37	S119	KGQLKTKASHSTSQLSQKLKTTYKASTSKIV	Peptide87																0.056831	0.137129	0.139063	0.199185	0.197886	0.36849									0.179164	0.0216733	0.244285	-0.0552202	-0.263515	0.100369									0.155917	0.156229
E7EQ49	WDR37	S24	STARQTKQKRKSHSLSIRRTNSSEQERTGLP	Peptide88																							-0.00657663	-0.308393	-0.286515	-0.472089	0.0892564	0.0296595		-0.122573	-0.112154	-0.10893	-0.319541	-0.161282	-0.150873									-0.205727	-0.271901
Q1JUQ3	FKBP12-Exin	S9	_______MGVQVETISPGDGRTFPKRGQTCV	Peptide89		-0.151427	0.461695	-0.0827789	-0.326336	0.0666002	-0.16223									0.17386	0.442933	0.0643904	0.203468	0.152474	0.210055		-0.0809424	0.299656	-0.177841	-0.00595508	-0.250523	0.00973692		-0.113582	0.194382	0.0355921	-0.0151499	-0.237285	-0.0889736									0.0988887	0.149462
A0A087WTU3	TEX264	S174	PGSRETSAATLSPGASSRGWDDGDTRSEHSY	Peptide90		-0.66728	-0.493922	-0.41144	-0.897549	-0.284167	-0.441959
A0A087WTU3	TEX264	S175	GSRETSAATLSPGASSRGWDDGDTRSEHSYS	Peptide91																							-0.826528	-0.613315	-0.536514	-0.544958	0.314515	-0.535404																-0.512463	-0.52444
A0A087WTU3	TEX264	S198	TRSEHSYSESGASGSSFEELDLEGEGPLGES	Peptide92		-0.627259	-0.363163	0.00954478	-0.10469	0.488211	-0.142642		-0.314645	-0.315512	0.0484473	-0.340612	0.423759	0.00471468		-0.723979	-0.164296	-0.0722766	-0.336859	0.602057	0.0326431		-0.343264	-0.409451	-0.326947	-0.152919	0.509326	0.0578794		-0.38	0.0304306	-0.126965	-0.306102	0.00505035	0.322417		-0.282146	-0.223282	-0.463156	0.079644	0.17859	0.21187		-0.136179	-0.266765
A0A087WX16	ALG9	S17	ASRGARQRLKGSGASSGDTAPAADKLRELLG	Peptide93																-0.653091	-0.341619	-0.585201	-0.736163	0.596735	-0.600548		-0.903328	-0.658656	-0.831756	-1.06148	1.08649	-1.01112
A0A087WU07	MINOS1	S2	______________MSESELGRKWDRCLADA	Peptide94																							-0.319435	-0.518132	-0.328697	-0.466985	-0.667199	-0.567269
A0A087WU07	MINOS1	S4	____________MSESELGRKWDRCLADAVV	Peptide95		0.0798784	0.258658	0.233513	0.036301	0.139748	-0.00688973									0.480453	0.445102	0.302342	0.15919	0.286675	0.390074									-0.0919983	0.00439445	0.0467922	-0.183739	-0.513064	-0.111919
K9JIK7	GPErik	S45	LLISYGIRRLIKKSPSDVKPLPSPDTDVPLS	Peptide96																																												0.916047	-0.835548
K9JIK7	GPErik	S60	SDVKPLPSPDTDVPLSSVEIENPETSDQ___	Peptide97																																												1.28062	-0.920124
K9JIK7	GPErik	S61	DVKPLPSPDTDVPLSSVEIENPETSDQ____	Peptide98									-1.23825	-1.40721	-1.1345	-0.25627	-0.258136	-0.556846		-0.957308	-1.3676	-0.480923	-0.777151	-0.45338	-0.240466		-1.04945	-1.47324	-0.675174	-0.65263	-0.244185	-0.739439		-0.488886	-0.937998	-0.746082	-1.16753	-0.590766	-0.529011		-0.878688	0.00301141	-0.25192	-0.558583	-1.1273	-0.819501		0.98829	-1.57
K9JIK7	GPErik	S70	TDVPLSSVEIENPETSDQ_____________	Peptide99																																					-0.436464	0.225209	-0.0832898	-0.231092	-0.692376	-0.455167		1.12232	-1.03497
A0A087WU39	PARK2	S96	IDSGTVKSKIKQLMISETGMPTETFRIHRRG	Peptide100																														0.0550053	-0.348181	-0.0190777	-0.310213	0.0172993	0.029853		-0.0127146	-0.226785	0.116381	0.24336	0.283887	-0.0290339		0.0970153	-0.323848
A0A087WU53	MAGT1	S140	ADEEFQILANSWRYSSAFTNRIFFAMVDFDE	Peptide101		-0.370989	-0.116617	0.0424892	-0.347256	0.085312	-0.201672									-0.0992877	0.312834	-0.182389	-0.109334	-0.00824018	0.0344369		-0.366651	-0.572945	-0.484416	-0.372013	-0.60477	-0.356363
A0A087WUB9	CTNNBL1	S550	RHIIKEYAENIGDGRSPEFRENEQKRILGLL	Peptide102		-0.0816794	-0.633753	0.029554	0.0453656	-0.00187852	-0.115718		-0.300965	-0.412298	-0.113266	-0.176274	-0.0372415	-0.330935		-0.454695	-0.174079	-0.109474	-0.0493115	0.0796999	0.185212									-0.16436	-0.436016	-0.0899182	-0.177635	-0.112247	-0.0890098									-0.109267	-0.454061
A0A087WUK2	HNRNPDL	S241	LKGKEPPKKVFVGGLSPDTSEEQIKEYFGAF	Peptide103																														-0.551654	-0.91586	0.0431715	-0.455895	0.396649	-0.132526		-0.313493	-0.624365	-0.127886	0.175265	0.602596	-0.0231515
A0A087WUT6	EIF5B	S107	TSKDKKKKGQKGKKQSFDDNDSEELEDKDSK	Peptide104		-0.0424616	-0.485185	0.456275	-0.283237	0.730805	0.453706		0.32388	0.190295	0.905568	0.073872	0.966971	0.850964		-0.251197	0.157524	0.54112	-0.215967	0.740072	0.445448		-0.0841703	0.284672	0.51997	-0.0361329	0.936074	0.720411		0.406903	0.274883	0.466874	0.152078	0.236037	0.806002									0.393173	0.485153
A0A087WUT6	EIF5B	S113	KKGQKGKKQSFDDNDSEELEDKDSKSKKTAK	Peptide105		0.859405	-0.13725	0.949224	0.534	-0.203532	-0.042653		1.17671	0.826659	1.31168	0.775333	0.192941	0.756748		0.784722	0.0591478	0.509006	0.521758	-0.266058	0.200722		1.11467	0.613718	1.25513	0.928407	0.0721795	0.23649		0.787172	0.317203	0.892738	0.779894	0.58348	0.292813									0.83031	0.328461
A0A087WUT6	EIF5B	S164	KAKGKAQKSNKKWDGSEEDEDNSKKIKERSR	Peptide106		0.58257	-0.0818641	0.812209	0.294142	0.302663	0.417207		0.86078	0.648773	1.18199	0.608559	0.55381	0.907394		0.661606	0.229945	0.663372	0.359586	0.503982	0.425394		0.761207	0.575456	1.02228	0.520589	0.593478	0.574923		0.77227	0.408166	0.865444	0.681695	0.464705	0.577868									0.588873	0.221159
A0A087WUT6	EIF5B	S214	GQKKNQKNKPGPNIESGNEDDDASFKIKTVA	Peptide107		1.24742	-0.523798	1.27164	1.0516	0.512988	0.854497		0.902404	0.27241	1.16807	0.639287	0.749029	0.781021		0.685565	-0.0162609	0.950188	0.485969	0.566168	0.557348		0.87837	0.221307	1.31909	0.685033	0.723358	0.664795		0.759527	0.259231	0.938339	0.683175	0.774159	0.768601		0.758853	0.483613	1.16262	0.433693	0.997367	0.706969		0.69998	0.300536
A0A087WUV8	BSG	S166	KRRKPEDVLDDDDAGSAPLKSSGQHQNDKGK	Peptide108		0.095286	-1.04633	0.28496	0.200259	-0.228539	-0.132377																																					-0.945882	-0.227743
B0QY53	CBY1	S20	GNTFSPKKTPPRKSASLSNLHSLDRSTREVE	Peptide109									-0.0965725	-0.735686	0.0667996	-0.374415	0.233859	-0.398207																														-0.296058	-0.78782
A0A087WUZ3	SPTBN1	S2342	RAQTLPTSVVTITSESSPGKREKDKEKDKEK	Peptide110									0.294282	-0.590887	0.188799	0.0365821	0.581886	-0.0195765		-0.104039	-0.343001	-0.0374975	-0.135264	0.151022	-0.0753062									0.0969397	-0.689877	0.146315	0.159191	0.452053	0.232027		0.192865	-0.150049	0.370096	0.24997	0.319594	0.110083		0.384994	-0.307203
A0A087WUZ3	SPTBN1	S2343	AQTLPTSVVTITSESSPGKREKDKEKDKEKR	Peptide111		0.233493	-0.911764	-0.0340336	0.35004	0.218098	0.205526		0.572901	-0.650816	0.361851	0.217676	0.703192	-0.0565769									0.273962	-0.378454	0.334864	0.160914	0.195627	0.210833		0.0729681	-0.777775	0.241024	0.0409867	0.687312	0.140154		0.137813	-0.122422	0.343264	0.265005	0.20773	-0.036092		0.586417	-0.731471
A0A087WUZ3	SPTBN1	S2166	EMVNGATEQRTSSKESSPIPSPTSDRKAKTA	Peptide112		-0.447381	-1.04716	-0.17762	0.0839078	0.112955	-0.0328665																-0.139382	-0.892485	-0.217487	-0.327065	-0.207844	-0.436477																-0.0909822	-1.07649
A0A087WUZ3	SPTBN1	S2167	MVNGATEQRTSSKESSPIPSPTSDRKAKTAL	Peptide113		0.278941	-0.14596	0.0946721	0.262546	0.499177	0.0766706									-0.276116	-0.0149757	0.342574	-0.00770685	0.278462	0.0287787		0.0660385	-0.0639419	0.143828	0.107264	0.187316	-0.111301		-0.0442024	-0.22419	0.160628	-0.172443	0.461497	0.025126									0.50755	-0.361036
A0A087WUZ3	SPTBN1	S2171	ATEQRTSSKESSPIPSPTSDRKAKTALPAQS	Peptide114		-0.350175	-0.733716	-0.299116	-0.061694	-0.0900971	-0.184925																-0.208117	-0.608444	-0.0234786	-0.346285	-0.266199	-0.22102																0.0457477	-0.696548
A0A087WUZ3	SPTBN1	S2130	AESQQQWDTSKGEQVSQNGLPAEQGSPRMAE	Peptide115		-0.399829	-0.270433	-0.832807	-0.462852	-0.205112	-0.344689																-0.439827	-0.642538	-0.767881	-0.598805	-0.677774	-0.630488
A0A087WUZ3	SPTBN1	S2140	KGEQVSQNGLPAEQGSPRMAETVDTSEMVNG	Peptide116		-0.0712243	0.142054	-0.0969916	-0.0914522	-0.0584127	-0.138847									-0.334061	-0.123811	-0.0409168	-0.0290393	-0.0825954	-0.186368		-0.0208025	-0.151107	-0.127626	-0.0365547	-0.157245	-0.22046		-0.259023	-0.302362	-0.250192	-0.19834	0.31026	-0.241698									0.171279	-0.568543
A0A087WUZ3	SPTBN1	S257	EQHLGLTKLLDPEDISVDHPDEKSIITYVVT	Peptide117																														-0.244028	-0.274245	0.0407831	-0.135268	-0.0489169	0.00453956									-0.0825811	-0.509242
A0A087WUZ3	SPTBN1	S2360	GKREKDKEKDKEKRFSLFGKKK_________	Peptide118		-0.299106	-1.15076	0.526068	-0.0671595	0.22861	-0.0141596		-0.204795	-0.668289	0.208223	-0.339628	0.667534	-0.2826									0.292026	-0.952776	-0.0999481	0.14435	0.252713	-0.476408																0.328063	-0.698988
A0A087WUZ3	SPTBN1	S2104	VRRQQEEEERKRRPPSPEPSTKVSEEAESQQ	Peptide119																-0.149737	-0.0825708	0.169703	0.034732	-0.0880737	-0.0382546		0.219331	0.0231794	0.153185	0.144863	-0.061546	-0.0682815		-0.0713609	-0.220537	0.112914	-0.0795708	0.438824	-0.0538573		0.173656	0.0237531	0.277215	0.126908	0.599575	0.0658049		0.460718	-0.297425
A0A087WV97	SMAP2	S214	SNTLEKDLDLLASVPSPSSSGSRKVVGSMPT	Peptide120																-0.297242	-0.399116	0.312713	-0.25045	-0.688224	-0.13635									-0.195405	-0.686549	-0.121219	-0.298513	0.169321	0.0900664		0.192615	-0.157158	0.373096	-0.0923434	0.474294	0.119653		-0.0304254	-0.64762
K7EK53	EIF3K	S130	VEKIDFDSVSSIMASSQ______________	Peptide121									0.124171	-0.0227607	0.0535489	-0.159024	-0.247286	0.0549525		-0.0403567	-0.138246	0.0371872	0.129161	-0.0156353	0.0188486		0.154463	-0.141524	0.0083856	-0.0602019	0.00919336	0.176627		-0.0367837	-0.174808	-0.089634	0.000708109	0.201363	0.0349942		-0.00480308	-0.14934	-0.0399431	0.016654	0.220683	0.0738506		0.167117	0.00476247
P17612	PRKACB	S263	YEKIVSGKVRFPSHFSSDLKDLLRNLLQVDL	Peptide122		0.27047	0.0148743	0.15764	0.269626	0.423775	0.328881		0.15639	-0.342066	0.163783	-0.0328156	0.0888249	0.0448443		0.470046	0.159341	0.234305	0.259898	0.497702	0.208535		0.255386	-0.0644883	0.159329	0.0311381	0.0837738	0.0912862		0.184434	-0.0942965	-0.00304869	0.0924743	0.174431	0.322306		0.418834	0.119531	0.226698	0.270493	0.161238	0.206318
P17612	PRKACB	S264	EKIVSGKVRFPSHFSSDLKDLLRNLLQVDLT	Peptide123		0.484603	0.0405729	0.506956	0.513768	0.48404	0.493945		0.496662	0.0457117	0.421154	0.133484	0.19582	0.24677		0.685361	0.354989	0.463451	0.459232	0.546659	0.531151		0.440622	0.226715	0.38055	0.244345	0.274398	0.256824		0.361824	0.230439	0.438847	0.343121	0.240611	0.371857		0.502625	0.33582	0.46165	0.375596	0.209083	0.378796		0.340948	0.399261
P22694-2	PRKACB	S386	DTSNFDDYEEEDIRVSITEKCAKEFGEF___	Peptide124									0.362249	0.105125	0.372287	0.101595	0.245009	0.301623		0.413131	-0.0670101	0.2938	0.098292	0.161708	0.274785		0.307436	0.112213	0.465756	0.184636	0.345049	0.240614		0.180999	0.113318	0.318036	0.240685	0.396242	0.0716363		0.116173	-0.0792606	0.292597	0.110618	0.584001	0.0431299		0.768595	0.0117157
P17612	PRKACB	S54	AGLEDFERKKTLGTGSFGRVMLVKHKATEQY	Peptide125									-0.119705	-0.188197	-0.00958823	0.0229726	-0.0132421	0.0730641																														-0.489482	-0.219471
K7EQH1	C18orf25	S66	VISSMPCLLMELRRDSSESQLASTESDKPTT	Peptide126																-0.472922	-0.181855	-0.448244	-0.702045	0.0224159	-0.297132									-0.604768	-0.377381	-0.641439	-0.461011	-0.029617	0.103724
K7EQH1	C18orf25	S67	ISSMPCLLMELRRDSSESQLASTESDKPTTG	Peptide127		-0.289158	0.510281	0.289399	-0.368655	0.827562	-0.285389									0.127022	0.997252	0.434964	0.0295459	1.41116	-0.0561982																							-0.503114	-0.0623998
A0A087WVF6	TTLL11	S52	ALALAPALSTMRRGSSESELAARWEAEAVAA	Peptide128																-0.261288	-0.0376906	-0.317651	-0.395126	0.121127	-0.226292
B5MCL8	INPP5J	S241	RSPGLARFPGLALRPSSRERRGASRSPSPQS	Peptide129																-0.621246	-0.651396	0.29579	-0.409461	-0.227672	-0.130666																0.067277	-0.370343	0.105616	0.0609533	0.554275	-0.266017		-0.649421	-0.579517
B5MCL8	INPP5J	S242	SPGLARFPGLALRPSSRERRGASRSPSPQSR	Peptide130		0.55442	0.282608	-0.0936487	-0.267028	-0.332202	-0.270387																-0.124668	0.0683877	-0.166443	-0.235012	-0.0921072	-0.141246		-0.0441247	-0.285762	-0.239835	0.0470298	-0.215325	-0.160845		0.0233718	-0.0872584	-0.255124	-0.094379	0.532576	-0.16318
Q9NW25	SSBP3	S237	NGSLGSGDIDGLPKNSPNNISGISNPPGTPR	Peptide131																0.0277906	-0.164834	-0.19622	-0.22143	-0.337462	-0.0961561									-0.383994	-0.19683	-0.0431427	-0.288894	0.0786337	-0.330224
V9GY78	RRBP1	S58	KKAEGSPSEGKKAEGSPNQGKKADAAANQGK	Peptide132																-0.244443	-0.212259	0.38843	0.339076	0.0552446	0.0557945																							0.245019	-0.831913
P55198	MLLT6	S423	RFSTTTSSSGRARAPSPGDYKSPHVTGSGAS	Peptide133																																												-0.516491	-0.537609
A0A087WW59	C11orf96	S112	LSLQREQLSSCKLRNSLDSSDSDSAL_____	Peptide134		-0.475929	-0.451481	-0.736782	-0.675879	-0.13756	-0.647434		-0.339148	-0.193872	0.139623	-0.459331	0.604318	-0.415939																							-0.688827	-0.0420629	-0.401197	-0.664432	0.408405	-1.1786		0.898392	-1.12624
A0A087WW59	C11orf96	S86	VSPMEEEKAKKSFLQSLECLRRSTQSLSLQR	Peptide135									-0.761435	-1.62536	-0.916617	-0.956606	0.826075	-1.33233		-1.44822	-1.35497	-0.448307	-1.16516	-1.14459	-1.10784		-0.742373	-1.26254	-0.558277	-0.566627	-0.798365	-0.722723		-0.740633	-1.58452	-0.417971	-0.793386	-0.0742883	-0.79816		-0.573334	-0.560566	0.0919247	0.184445	-0.503257	-0.239348		0.319831	-2.0037
A0A087WW59	C11orf96	S93	KAKKSFLQSLECLRRSTQSLSLQREQLSSCK	Peptide136																-1.50978	-0.766142	-0.159058	-0.849836	-0.590604	-0.54137		-0.519441	-0.955931	-0.163872	-0.353899	-0.253816	-0.400016		-0.512448	-0.875182	-0.232926	-0.48814	-0.0340165	-0.571765									0.774574	-1.65624
A0A087WWA3	KIF1B	S1031	NQSDFSSVAMTRSGLSLEELRIVEGQGQSSE	Peptide137																																												-0.35165	-0.419909
J3KRB3	RPL17	S111	K ES ELKGLDVDSLVIEHIQVNKAPKMR	Peptide138																														0.0249478	-0.89607	0.6105	-0.695394	0.293269	-0.457203									-0.135736	-0.250622
A0A087WWH3	GLTSCR1	S1361	PGAPEGTPAGRARGGSPAPLPAKVDEATSGL	Peptide139		-0.594395	-0.915821	-0.493379	-0.171138	-0.0969046	-0.338338																-0.331495	-0.923547	-0.342932	-0.416081	-0.552815	-0.538788
E9PJ21	HYOU1	S567	SLDRVESVFETLVEDSAEEESTLTKLGNTIS	Peptide140																-0.124019	-0.245707	0.362778	0.101294	0.158376	0.162869		0.0692664	-0.49983	0.301303	0.00608133	0.183801	0.156215		-0.0690264	-0.465764	0.207412	-0.261882	0.51273	0.0579213		0.0441421	-0.182087	0.51064	0.339048	0.653272	0.16876		-0.303454	-0.334506
A0A087WWJ1	MSH6	S226	TTYVTDKSEEDNEIESEEEVQPKTQGSRRSS	Peptide141																0.0717845	-0.190571	0.319877	0.0425426	-0.194442	0.206405		0.222032	0.0525457	0.470165	0.173271	0.316827	0.377328		0.243822	-0.33903	0.409004	-0.0158575	0.612242	0.359184									0.366807	-0.316833
A0A087WWK8	IQSEC1	S75	GQQQRTRRPKLQHSTSILRKQAEEEAIKRSR	Peptide142		0.0508726	0.545128	-0.196163	-0.225267	0.0630724	-0.0499406		0.288994	0.0215991	0.0106433	-0.316934	0.00810586	-0.282966		0.0506238	0.0645403	-0.225972	-0.0635579	0.025259	-0.135992		0.175521	-0.00597804	0.040341	-0.035616	0.0635187	0.0343193		-0.0641156	-0.0809916	-0.00477467	-0.107456	0.229231	-0.132643		0.00936118	0.136093	-0.326966	-0.0439966	0.610846	-0.0713818
A0A087WWK8	IQSEC1	S166	RMSRRIVLSNMRMQFSFEGPEKVHSSYFEGK	Peptide143																0.475322	0.170007	0.164614	0.144298	0.183196	0.153809									-0.257488	-0.301483	-0.139274	-0.258239	0.128464	-0.300478		-0.0288875	0.14767	-0.102075	0.0797861	1.02025	0.288876
A0A087WWK8	IQSEC1	S911	SYASGEGLKRSALSSSLRDLSEAGKRGRRSS	Peptide144		0.286377	0.140388	0.0538793	0.0652926	-0.00778849	0.0744818									0.0447794	-0.0195112	0.246773	0.0945781	0.0280709	0.214696									0.0169435	-0.0565536	0.098499	-0.0167394	0.0900895	0.0455665									0.426652	-0.0863872
A0A087WWK8	IQSEC1	S403	KRQSAYERSLGGQQGSPKHGPHSGAPKSLPR	Peptide145		0.600531	-0.308059	0.613801	0.596117	0.276888	0.290627									0.427099	0.0745471	0.426106	0.460821	0.23156	0.36996		0.591017	0.095917	0.602559	0.482044	0.135546	0.206056		0.321061	-0.375636	0.684843	0.274948	0.734143	0.194243									0.515447	-0.25834
A0A087WWK8	IQSEC1	S374	RVEHLPLLTIEPPSDSSVDLSDRSERGSLKR	Peptide146									0.320662	0.511573	0.304692	0.284034	0.16345	0.359774																-0.00798286	-0.0793064	0.104431	0.182424	-0.0525727	0.12929
A0A087WWN2	CUL4A	S10	______MADEAPRKGSFSALVGRTNGLTKPA	Peptide147		0.0383474	-0.589526	0.884149	0.198879	-0.0597161	0.531157		-0.36403	0.412145	-0.355665	-0.305894	0.560237	-0.295484		0.319	0.130002	-0.515296	-0.0435395	0.613165	-0.35776		0.229153	-0.463303	0.140857	-0.00539882	0.452236	-0.425932		0.155614	-0.092476	-0.573821	0.391545	-0.13759	0.260849		-0.16923	0.15946	0.718631	0.307998	0.921123	-0.76406		-0.00806845	0.120168
A0A499FJY3	RBM15	S612	KRRLPEESGGRHLDRSPESDRPRKRHCAPSP	Peptide148																-0.426563	-0.115088	-0.547475	-0.568459	-0.476985	-0.651709		-0.163041	-0.404194	-0.489478	-0.537864	-0.571254	-0.548509		-0.0223939	-0.599479	-0.633374	-0.62568	0.0744821	-0.903344
A0A499FJY3	RBM15	S83	YDTGGGSSSSRLHSYSSPSTKNSSGGGESRS	Peptide149																							0.0899793	-0.562824	0.176708	-0.0808891	0.0880273	-0.37553		-0.0961797	-0.795011	0.0799293	-0.29754	0.784712	-0.462457									-0.186156	-0.691269
A0A499FJY3	RBM15	S84	DTGGGSSSSRLHSYSSPSTKNSSGGGESRSS	Peptide150		-0.0371919	-0.864667	0.0485847	-0.0968873	-0.0501705	-0.242252									-0.100835	-0.40617	-0.0343873	-0.116599	0.0764095	-0.0435348
A0A499FJY3	RBM15	S656	NSDNDRSSRLLLERPSPIRDRRGSLEKSQGD	Peptide151		0.161184	0.25981	0.00310649	0.0776124	0.226505	0.179859		-0.0982374	0.02635	-0.125376	-0.0033486	0.0884263	0.0909714		0.0900417	-0.0875643	-0.206211	0.012898	0.0864734	-0.197974		0.0479018	0.0940808	-0.0153842	0.106426	0.190366	0.0376209		-0.0142152	-0.019344	-0.399685	0.126985	0.395916	0.0499307		0.0938618	0.365323	0.169697	0.253137	0.581243	-0.123498		0.0701837	-0.171002
A0A499FJY3	RBM15	S248	VGGHRHPPGGGGGQRSLSPGGAALGYRDYRL	Peptide152		-0.250281	-0.28469	-0.403376	-0.183073	-0.00200793	-0.106593																-0.0707249	-0.284968	0.0685493	-0.0649725	-0.0210448	0.00199758		-0.183853	-0.411523	-0.0785416	-0.389032	0.513619	-0.299974									-0.0508835	-0.445944
A0A499FJY3	RBM15	S250	GHRHPPGGGGGQRSLSPGGAALGYRDYRLQQ	Peptide153									-0.148111	-0.702587	-0.413469	-0.578799	-0.320648	-0.736162		0.0702586	-0.144754	-0.220675	-0.129277	-0.0818807	-0.112514		-0.261617	-0.424322	-0.402695	-0.388027	-0.414405	-0.419003									-0.219848	-0.305813	-0.535666	-0.385653	0.0944129	-0.391609
A0A0C4DH79	RSBN1	S33	EEPDKEGKEKPHAGVSPRGVKRQRRSSSGGS	Peptide154																																												-0.510851	-0.446432
A0A087WX02	SEPW1	S70	LIHSKKKGDGYVDTESKFLKLVAAIKAALAQ	Peptide155		0.368823	-0.0444003	0.667292	0.310964	0.404633	0.240102									1.00386	0.179498	0.792523	0.515	0.54035	0.872456		0.263092	-0.0330536	0.737367	0.112154	-0.00472082	-0.0196303		0.224551	-0.00276939	0.739896	0.125645	-0.00490921	0.0885793									0.341957	0.11278
A0A1B0GUL8	GRIP2	S45	KDAGGADVSLACRRQSIPEEFRGITVVELIK	Peptide156									-0.539687	0.44928	-0.210476	-0.0148366	0.13016	-0.156037																-0.217139	-0.229926	-0.243492	-0.43583	-0.366932	-0.205983									-0.477201	-0.536121
A0A087WX59	ADRM1	S172	GSSGPPGSSSSSSSRSQSAAVTPSSTTSSTR	Peptide157																-0.372852	-0.321168	-0.382134	-0.477742	-0.273896	-0.0782476		0.0136902	-0.0735816	-0.307125	-0.176453	-0.377799	-0.124488		-0.39646	-0.142051	-0.246381	-0.237814	0.0676623	-0.353672
A0A087WXC5	NDUFA10	S231	RRIQKKGDPHEMKITSAYLQDIE YKKTFL	Peptide158																0.529291	-0.307632	0.604934	0.249161	0.176959	0.187154									-0.123697	-0.410917	0.208151	-0.0709067	-0.116092	0.234126		0.305888	-0.106208	0.490243	0.241336	0.151828	0.337871		-0.343395	-0.0016431
A0A087WXN9	MTSS1L	S579	RRTPSTKPTVRRALSSAGPIPIRPPIVPVKT	Peptide159																																					-0.298668	-0.502417	-0.44224	-0.274208	0.413641	-0.324211
A0A087WXN9	MTSS1L	S455	SPAASDLAMVLTRGLSLEHQKSSRDSLQYSS	Peptide160		0.187386	0.160038	0.217489	0.125855	0.555551	0.264127		0.208741	-0.122606	0.274515	-0.221074	0.502092	-0.0724862		-0.14777	0.102999	0.214921	-0.148528	0.305815	-0.0536306		0.0457687	0.060509	0.232566	0.193011	0.450169	0.305187		0.192094	-0.00436615	0.0409605	-0.0116982	0.471278	0.0165839		0.232317	0.456944	0.128299	0.175756	1.02778	-0.0516054		0.537685	-0.12802
A0A087WXN9	MTSS1L	S600	IRPPIVPVKTPTVPDSPGYMGPTRAGSEECV	Peptide161																							-0.309212	-0.576265	-0.368883	-0.130735	0.188341	-0.29693																-0.206199	-0.6251
A0A087WXS0	TNNI2	S57	QNYLAEHCPPLHIPGSMSEVQELCKQLHAKI	Peptide162		0.0584751	-0.487173	0.455687	0.429116	0.315807	0.312003		0.203023	-0.329417	0.414677	-0.148038	-0.109228	0.0229368		0.250435	0.0144819	0.300361	0.231314	0.307648	0.275016		0.260032	-0.0920877	0.464071	-0.0429059	-0.350193	-0.0720632									0.297925	-0.00159516	0.335049	0.0414432	-0.142806	0.278849		0.0365545	-0.167539
A0A087WXS0	TNNI2	S59	YLAEHCPPLHIPGSMSEVQELCKQLHAKIDA	Peptide163		0.228772	-0.539413	0.469151	0.545743	0.0934933	0.273082		0.128614	-0.485402	0.445802	0.239171	0.00429649	0.157355		0.121483	-0.0460832	0.572922	0.480093	0.231944	0.406872									0.217965	-0.0133371	0.411106	0.0599815	-0.255956	0.451256		0.327783	0.138251	0.361063	0.000515374	-0.392038	0.410703		-0.0983774	-0.0834571
A0A087WXS0	TNNI2	S20	QKRNRAITARRQHLKSVMLQIAATELEKEES	Peptide164																-0.253671	0.0574758	-0.164064	-0.251501	-0.0253574	0.0343985		-0.516681	-0.91963	-0.343767	-0.669837	-0.697538	-0.0489807									-0.207455	-0.543917	-0.155489	-0.37802	-0.0711797	0.00640564
A0A499FIX8	ESYT2	S682	SPGHISVKEPTPSIASDISLPIATQELRQRL	Peptide165																0.0432743	-0.126837	0.403056	0.182171	0.0487175	0.191623									-0.323499	-0.510026	-0.0443438	-0.38132	0.548991	-0.00312619		0.175498	0.0709624	0.310188	0.216191	0.433854	0.197119		-0.283491	-0.319966
A0A499FIX8	ESYT2	S685	HISVKEPTPSIASDISLPIATQELRQRLRQL	Peptide166																-0.439657	-0.0652973	-0.0810461	-0.194034	0.411576	-0.342329									-0.242554	-0.122821	-0.380025	-0.620585	0.474324	-0.512011		-0.163734	0.201451	-0.119432	0.119996	0.559573	-0.143431		-0.230086	-0.154276
A0A499FIX8	ESYT2	S615	SVSKEGRKTSIKSHMSGSPGPGGSNTAPSTP	Peptide167		0.0789239	-0.855809	0.363135	0.223902	0.443402	0.0506305																																					-0.235761	-0.189686
A0A499FIX8	ESYT2	S617	SKEGRKTSIKSHMSGSPGPGGSNTAPSTPVI	Peptide168		0.53329	-1.0492	1.00388	0.703579	0.163908	0.61929									-0.103575	-0.326146	0.344332	0.154689	0.0379577	0.076388									0.0933576	-0.643822	0.128357	-0.0183559	0.807515	0.0695856									0.221672	-0.598692
A0A499FIX8	ESYT2	S663	EAGPQGLHDLGRSSSSLLASPGHISVKEPTP	Peptide169		0.0654101	-0.104704	0.257577	0.058263	0.216733	0.166555		0.0933004	-0.0137799	-0.0706045	-0.115172	0.215361	-0.326432		-0.199175	0.132829	-0.0341533	-0.0910111	0.39536	0.0999897		-0.146603	0.072327	-0.0315617	-0.0158703	0.239069	-0.00738019		-0.0569617	0.165771	-0.291427	-0.0333057	0.302908	0.0136743		-0.124718	0.413464	0.090293	0.0601448	0.577709	-0.270455		0.0360513	0.00760175
P54646	PRKAA2	S377	GLKPHPERMPPLIADSPKARCPLDALNTTKP	Peptide170		0.479189	-0.62762	0.910466	0.4276	0.124149	0.457366		0.0685153	-0.753126	0.56017	0.268117	-0.0291253	0.196444		0.14726	-0.336834	0.535009	0.105463	-0.118572	0.236879		0.379389	-0.560763	0.633668	0.286312	-0.165112	0.203176		0.069119	-0.736999	0.529026	0.272393	0.484611	0.0742501		0.468639	-0.30979	0.842537	0.231628	0.553633	0.27476		0.0851633	-0.399502
P54646	PRKAA2	S491	VVEQRSGSSTPQRSCSAAGLHRPRSSFDSTT	Peptide171																0.417784	0.705034	0.0974134	0.199109	0.714752	0.0217165		-0.108193	0.940644	-0.115915	-0.198833	0.251384	-0.633885		-0.0666904	0.945881	-0.214041	-0.0792124	-0.0930675	-0.44223									-0.0726123	0.4585
P54646	PRKAA2	S515	SSFDSTTAESHSLSGSLTGSLTGSTLSSVSP	Peptide172																							-0.162268	-0.869235	0.0268448	-0.285795	-0.478262	-0.226734																-0.410797	-0.941896
A0A087WY61	NUMA1	S169	APVPSTCSSTFPEELSPPSHQAKREIRFLEL	Peptide173																-0.124348	-0.240208	-0.0800649	-0.249201	-0.14672	-0.202064									-0.520287	-0.576378	-0.171735	-0.58065	0.0667726	-0.210007		-0.451856	-0.531936	-0.180256	-0.259208	0.528145	-0.389959
A0A087WY61	NUMA1	S2031	KKAAPASTKQADRRQSMAFSILNTPKKLGNS	Peptide174		0.158141	-0.505991	0.721001	0.255698	-0.11974	0.380157		0.0258571	0.292671	0.31962	0.127174	0.87827	0.265591																0.126386	0.175142	0.015577	0.300216	0.233303	0.306445		0.0117482	0.166317	0.44561	0.299589	0.832869	-0.167219		0.164123	-0.318979
A0A087WY61	NUMA1	S1741	PRTQPDGTSVPGEPASPISQRLPPKVESLES	Peptide175		-0.191712	-0.00630249	-0.21052	-0.0552747	0.661442	0.0376064									-0.257866	0.419766	0.0815203	-0.0154299	0.348246	-0.0553571		-0.248335	0.0349952	-0.197256	-0.0868443	0.254675	0.0666293		-0.0701362	-0.0106621	-0.175611	-0.333608	0.437649	0.0644771									0.219192	-0.24063
A0A087WY82	F11R	S264	TKKGTSSKKVIYSQPSARSEGEFKQTSSFLV	Peptide176		-0.464437	-0.411856	-0.852181	-0.70321	-0.712941	-0.709111									-0.740812	-0.744027	-0.386954	-0.565112	-0.344045	-0.483553		-0.351364	-0.538079	-0.40746	-0.454366	-0.489478	-0.347575		-0.566574	-0.767329	-0.106919	-0.435663	-0.113365	-0.442277
E9PFH7	MAPK8IP3	S579	STIWQFFSRLFSSSSSPPPAKRPYPSVNIHY	Peptide177									-0.128027	-0.267705	-0.00995048	0.127532	-0.0620619	0.135834																														-0.522375	-0.222371
A0A087WYJ0	KCNN3	S128	SSNSTAILHPSSRQGSQLNLNDHLLGHSPSS	Peptide178									-0.24477	-0.447157	-0.101501	0.318098	-0.0485496	-0.197755																							0.0122458	0.00932735	-0.0629492	-0.275259	0.489652	-0.0313958		-0.655434	-0.290848
A0A087WYN9	DHX29	S200	KSRPKFQSPQIQATISPPLQPKTKTYEEDPK	Peptide179		0.228428	0.0794049	0.423201	0.292356	0.406684	0.432725		0.0715629	0.031372	0.455944	0.121667	0.0569804	0.145382		0.177968	-0.0626245	0.431004	0.358474	0.154437	0.376291		0.239814	0.197062	0.348116	0.158802	0.176391	0.30142		0.0222048	-0.0205019	0.232322	0.201577	0.489588	0.221715		0.226394	0.190358	0.343393	0.0959487	0.727658	0.223095		0.114242	0.120092
A0A087WYN9	DHX29	S1236	VAGLYDNVGKIIYTKSVDVTEKLACIVETAQ	Peptide180																0.825848	0.266124	0.527549	0.500269	0.503222	0.421421		0.0866335	0.284091	0.281839	-0.111415	0.120008	-0.0953654		0.24046	0.148597	0.33272	0.269394	-0.488846	0.080319									0.139057	0.295492
A0A087WYS1	UGP2	S13	___MRIFVEDLSKAMSQDGASQFQEVIRQEL	Peptide181		-0.319254	-0.0652352	-0.12298	-0.0173801	1.03109	0.00957078		-0.187017	-0.792118	-0.0670121	-0.400416	0.626075	-0.491222		-0.23308	-0.126099	0.0536712	-0.424499	0.916662	-0.369363		-0.462985	-0.122439	-0.210903	-0.456204	0.886392	-0.271751		-0.165541	-0.209032	-0.418172	-0.329756	0.761811	-0.399402		-0.145977	0.384168	-0.297577	-0.288855	1.4423	-0.377925		-0.381934	-0.0944264
A0A087WYS1	UGP2	S102	QPYEKIKARGLPDNISSVLNKLVVVKLNGGL	Peptide182		0.103713	-0.0999859	0.25554	0.321259	0.43375	-0.00340403		0.0878679	-0.0816157	0.364262	0.0340994	0.264861	0.160519		0.297904	0.217114	0.440376	0.218143	0.373012	0.256944		0.142564	-0.171749	0.254887	0.175026	0.153871	0.129986		0.232094	0.137074	0.202146	0.274502	-0.0515741	0.245513		0.325022	0.0282364	0.348337	0.17192	-0.198306	0.109384		0.112558	0.149087
A0A087WYS1	UGP2	S103	PYEKIKARGLPDNISSVLNKLVVVKLNGGLG	Peptide183		0.150793	-0.0979385	0.319264	0.327083	0.339382	0.0686895		0.106316	-0.0542401	0.37516	0.0227557	0.264714	0.164378		0.316084	0.240419	0.473529	0.234341	0.407846	0.276989		0.205915	-0.103408	0.277419	0.1693	0.118476	0.082217		0.242456	0.16428	0.2121	0.288533	-0.0498578	0.250359		0.328863	0.0689276	0.349095	0.168931	-0.198303	0.136331		0.151985	0.175722
A0A087WYS1	UGP2	S45	LSVKKELEKILTTASSHEFEHTKKDLDGFRK	Peptide184									0.268928	-0.201215	0.0661613	0.0397875	-0.0496572	-0.084983		0.072416	-0.389838	-0.283193	-0.228294	-0.432645	0.172457		-0.0904351	-0.210127	0.073596	-0.0107991	-0.199627	0.20454		-0.111537	-0.267103	0.0746867	-0.0965105	-0.138009	0.0727728		-0.271766	-0.409722	-0.352775	-0.13704	0.111024	-0.0976366
A0A087WYS1	UGP2	S435	EKREFPTVPLVKLGSSFTKVQDYLRRFESIP	Peptide185									0.605031	0.0497811	0.692898	0.331848	0.499961	0.295402		0.156946	-0.049147	-0.096794	-0.00467055	0.09067	-0.136895		0.423812	-0.105229	0.60794	0.25728	0.120989	0.245686		0.262756	0.0514499	0.480846	0.328447	-0.00522059	0.216435		0.148217	-0.476962	0.168013	-0.0529681	-0.205184	0.130884		0.361617	0.217147
A0A087WYS1	UGP2	S120	LNKLVVVKLNGGLGTSMGCKGPKSLIGVRNE	Peptide186		0.198138	0.0625557	0.129894	0.103009	0.382553	0.323589		0.350213	-0.289986	0.392836	-0.0511719	-0.0106157	0.00805605		0.784824	0.161454	0.389981	0.357445	0.227106	0.331007		0.349739	-0.000878482	0.38834	0.0766253	-0.201436	0.0755907		0.0753909	0.112971	0.296922	0.210255	-0.0378326	0.150679		0.381426	0.0791998	0.200813	0.0892585	-0.285194	0.374861
A0A087WYS1	UGP2	S410	VKTTSDLLLVMSNLYSL GSLTMSEKREFP	Peptide187																0.215274	-0.0161491	-0.150571	0.045343	0.299221	0.0901794
A0A087WYT3	PTGES3	S117	WLSVDFNNWKDWEDDSDEDMSNFDRFSEMMN	Peptide188									-0.179863	-0.760253	-0.189667	-0.322762	-0.171282	-0.363253		0.0197286	-0.339851	-0.146923	-0.0352595	-0.0240192	-0.104241		-0.169929	-0.432817	-0.07867	-0.22961	-0.296366	-0.304797									-0.022987	-0.388272	-0.140859	-0.339579	0.046959	-0.167658
A0A087WYT3	PTGES3	S122	FNNWKDWEDDSDEDMSNFDRFSEMMNNMGGD	Peptide189		0.319222	-0.226936	0.425576	0.261379	0.398552	0.303104		0.292928	-0.0662474	0.325867	0.14913	0.0652785	0.13385		0.184081	-0.11095	0.345865	0.190865	0.260641	0.192302		0.188664	0.102936	0.365784	0.140139	0.171241	0.23316		0.162852	-0.13528	0.340332	0.137346	0.367401	0.179191		0.214102	0.167291	0.323066	0.170597	0.477542	0.156288		0.275972	-0.0571706
A0A087WYU2	C16orf13	S129	SPLRCTEPYAINGKISPQSNVDFDLMLRCRN	Peptide190																0.522931	0.164902	0.260839	0.500432	0.256851	0.403985		-0.285582	-0.198887	-0.147712	-0.347311	-0.39869	-0.15335		-0.405552	-0.399197	0.0311763	-0.175627	-0.305618	-0.206791		0.0329121	-0.0901547	0.0131227	0.108027	-0.0470758	0.212562
A0A087WYU2	C16orf13	S132	RCTEPYAINGKISPQSNVDFDLMLRCRNPEW	Peptide191									-0.306106	-0.800565	0.142946	-0.161687	-0.0494203	-0.117869		-0.726951	-0.593721	-0.326864	-0.524985	-0.0239091	-0.322032		-0.374999	-0.695792	-0.164701	-0.283117	-0.00387365	-0.1446									-0.15328	-0.472405	0.166002	-0.0704056	0.0299544	-0.206453		-0.295192	-0.468344
A0A087WYW3	NKTR	S163	CRRHKQTKKRRILIPSDIESSKSSTRRMKSS	Peptide192																0.241533	-0.0555095	0.247633	0.282143	0.0735929	0.250556									-0.213439	-0.137034	0.14697	-0.172558	0.299277	0.0794108		0.120423	0.18104	0.384279	0.21694	0.698632	0.253663		-0.114945	0.133771
E5RFQ9	STK3	S205	RHEEQQRELEEEEENSDEDELDSHTMVKTSV	Peptide193		0.526571	-0.257546	0.363929	0.443869	0.192636	0.37331		0.466792	0.0203962	0.493159	0.148115	0.495693	0.228836		-0.144241	-0.235491	0.267923	0.006115	-0.0728609	-0.0646015		0.356408	0.0570067	0.544089	0.349594	0.355732	0.312656		0.235934	-0.228791	0.4798	0.147456	0.708391	0.172467		0.310708	0.148601	0.490037	0.364124	0.736706	0.206653		0.539016	-0.238954
E5RFQ9	STK3	S212	ELEEEEENSDEDELDSHTMVKTSVESVGTMR	Peptide194																														-0.577408	-0.788986	-0.419897	-0.375602	0.387244	-0.142786		-0.35697	-0.556265	-0.116718	-0.108639	0.806369	-0.30125
B7Z385	CAP2	S189	TYKNPSLRAQGGQTQSPTKSHTPSPTSPKSY	Peptide195		-0.662021	-1.05554	-0.644416	-0.702345	0.75647	1.72576									-0.151175	0.0243227	-0.408122	-0.346807	-0.428622	0.269854		-1.02055	-1.21444	-0.798754	-0.633418	-0.702056	2.20324		-1.34081	-1.49131	-1.06171	-0.981517	-0.301484	2.40968		-0.750331	-1.0061	-0.817046	-1.07665	1.46055	1.13738
B7Z385	CAP2	S197	AQGGQTQSPTKSHTPSPTSPKSYPSQKHAPV	Peptide196																-0.439921	-0.531202	-0.685783	-0.360826	-0.546792	0.407533		-0.0455603	-0.312008	-0.169446	-0.184789	-0.176602	1.64301		-0.559792	-0.80569	-0.394374	-0.4283	1.00993	1.19119									-0.590576	-0.389131
B7Z385	CAP2	S200	GQTQSPTKSHTPSPTSPKSYPSQKHAPVLEL	Peptide197																-0.0881699	0.403185	-0.0901292	-0.101868	-0.314416	0.654692		-0.38347	-0.33299	-0.255633	-0.234302	-0.259864	1.40837		-0.335552	-0.274784	-0.12782	-0.0332072	-0.102913	0.588022									-0.360147	-0.18365
E5RHB5	PLEKHA2	S184	EGSEPGSHTILRRSQSYIPTSGCRASTGPPL	Peptide198																																												-0.0816382	-0.735667
Q12955-5	ANK3	S1774	GKQSTKETLKPKIHGSGHVEEPASPLAAYQK	Peptide199									0.205758	0.0219505	0.00524796	0.219537	0.113263	0.0369706		0.450613	-0.0933802	0.105589	0.280372	0.13848	0.20635									0.0702165	0.0741924	0.269615	0.21437	-0.195089	0.0592715		0.0968259	0.093238	-0.10065	0.136417	-0.286688	0.0334966
Q12955-5	ANK3	S1782	LKPKIHGSGHVEEPASPLAAYQKSLEETSKL	Peptide200									0.0784149	-0.596913	0.24195	0.366568	0.149223	0.482329																														-0.516287	-0.145281
Q12955-5	ANK3	S1713	QARRVTGGLLDRLDDSPDQCRDSITSYLKGE	Peptide201																							-0.0714288	-0.045359	0.0101326	-0.0794674	-0.0678554	0.0784348		-0.00680207	-0.151549	0.122112	-0.0805586	-0.235079	0.0783774									-0.320186	-0.285818
Q12955-5	ANK3	S1631	SPLRTPSRLSDGLVPSQGNIEHSADGPPVVT	Peptide202																-0.00417828	-0.685253	-0.500886	-0.352728	-0.374788	-0.472938									-0.550986	-0.303274	-0.273096	-0.288655	-0.691427	-0.274313
Q12955-5	ANK3	S1826	KKMSRTSPADGKPRLSLHEEEGSSGSEQKDL	Peptide203		-0.851074	-1.74284	0.626077	-0.229184	0.0988965	0.13662		-0.488597	-0.440751	0.135967	-1.01412	0.107863	-0.52549																														-0.305778	-0.726943
Q12955-5	ANK3	S1833	PADGKPRLSLHEEEGSSGSEQKDLKDSESDS	Peptide204		0.386201	-0.582781	0.468597	0.54683	0.276846	0.679366		0.728378	-0.369609	0.732472	0.391383	0.198703	0.528993		0.144454	-0.330257	0.511184	0.169216	0.127163	0.240156		0.519786	-0.068377	0.616566	0.304314	0.182992	0.370719		0.437175	-0.267659	0.88323	0.432203	-0.143586	0.500278		0.433106	0.0502994	0.678832	0.319498	0.0994408	0.386523		0.105949	-0.0824511
Q12955-5	ANK3	S1834	ADGKPRLSLHEEEGSSGSEQKDLKDSESDSS	Peptide205									0.76508	-0.441978	0.546966	0.513419	0.199607	0.489052									0.330261	-0.176707	0.56376	-0.0112202	-0.0437802	0.312753		0.0693303	-0.597033	0.708432	0.160533	-0.197137	0.14807		-0.180078	-0.688818	-0.011102	-0.14836	-0.206254	0.11423
A0A087WZ65	ANK3	S402	ESDQDDEIEKTDRRQSFASLALRPQSPCERT	Peptide206		0.0969916	-0.0674199	0.252446	0.182581	0.0658815	0.416003		0.0629638	-0.272492	0.092338	-0.0112307	0.00739392	0.0575429		0.179111	-0.117774	-0.0862483	0.281579	-0.0662808	-0.0443278		0.238606	-0.0760801	0.177084	-0.0654345	-0.0679396	0.0880781		0.131383	-0.225295	0.0947392	0.189673	0.0445162	-0.052929		0.241712	0.266564	0.316449	0.188232	0.267005	-0.0791316		0.298271	-0.186059
A0A087WZ65	ANK3	S412	TDRRQSFASLALRPQSPCERTDIRMAIVADH	Peptide207		0.262035	0.0917988	-0.00640166	0.216373	0.205922	-0.0629973		1.02167	-0.509136	0.617316	0.202357	-0.534507	0.517122		0.448992	-0.205455	0.746973	0.254388	-0.756662	0.480363		-0.202977	0.467334	0.305645	0.244277	-0.446747	0.801655		0.223146	-0.13588	0.90093	-0.10924	0.0141105	0.195602									0.324031	-0.0579899
Q12955-5	ANK3	S1790	GHVEEPASPLAAYQKSLEETSKLIIEETKPC	Peptide208		-0.377998	-0.773746	-0.343763	-0.307002	0.420135	-0.0653238
Q12955-5	ANK3	S1762	TKSYFPESQNDVGKQSTKETLKPKIHGSGHV	Peptide209		-0.245381	-1.93307	0.589438	0.0762292	-0.0721379	0.188149																																					-0.344422	-0.608205
Q12955-5	ANK3	S1817	TKPCVPVSMKKMSRTSPADGKPRLSLHEEEG	Peptide210																0.074348	0.175539	0.251369	0.0931601	0.131902	0.236965																							-0.459351	-0.244626
A0A087WZE9	HMGN3	S6	__________MPKRKSPENTEGKDGSKVTKQ	Peptide211																0.33859	0.17834	0.688861	0.335892	0.296193	0.374001		0.458157	0.123029	0.670003	0.263827	0.273795	0.15547		0.407006	0.0809297	0.710158	0.283128	0.00801587	0.28433									0.153715	0.00727181
M0R0X3	SAMD4B	S271	LGARAAFTTPDHAPLSPQSSVASSGSEQTEE	Peptide212									-0.062829	-0.431663	-0.190723	-0.30289	0.203383	-0.240359									-0.280282	-0.486584	-0.331326	-0.294095	-0.121873	-0.262229
E5RJM2	CDK16	S110	SPVRVRMRNHPPRKISTEDINKRLSLPADIR	Peptide213									0.559599	1.43054	0.512126	-0.162051	0.484468	-0.0869952		0.571421	0.607586	-0.315094	-0.0908273	0.636139	-0.341243		0.360139	0.295934	0.327283	0.600898	0.543472	0.0914893		0.151682	0.606238	0.0693103	0.450074	0.161148	0.349412									0.160735	0.601601
E5RJM2	CDK16	S138	DIRLPEGYLEKLTLNSPIFDKPLSRRLRRVS	Peptide214		0.982707	0.0791514	0.783185	0.572783	0.17395	0.551018		0.56693	-0.0725428	0.661683	0.364215	-0.0926558	0.422148		0.498653	0.0226713	0.494895	0.243899	-0.128735	0.421261		0.916332	-0.0112858	0.716427	0.567668	0.0346576	0.442615		0.343438	-0.302209	0.431344	0.465821	0.729934	0.393737		0.580346	-0.190238	0.601932	0.39779	1.46846	0.511261		0.326495	-0.153106
E5RJM2	CDK16	S78	LSSAPEIVHEDLKMGSDGESDQASATSSDEV	Peptide215																0.0240537	0.0445997	0.735449	0.283736	-0.172681	0.294909									0.340895	0.0195563	0.697221	0.118065	-0.3025	0.267648									-0.0404496	0.109229
E5RJM2	CDK16	S95	GESDQASATSSDEVQSPVRVRMRNHPPRKIS	Peptide216																-0.238847	0.118833	-0.0890402	-0.0806143	-0.0339248	-0.0185681		-0.0208538	-0.158303	-0.195451	0.015511	-6.72918e-05	0.0404582		0.0528264	-0.0164132	-0.089559	-0.0171034	-0.459123	0.107396									-0.208323	-0.201315
E5RJM2	CDK16	S119	HPPRKISTEDINKRLSLPADIRLPEGYLEKL	Peptide217		0.325796	-0.0177412	0.432002	0.00100259	0.0693465	0.28544		0.142239	-0.387757	0.014789	-0.145264	-0.0153463	0.0193497		0.104387	0.143843	0.0651944	0.116858	0.187584	0.0726962		0.143154	-0.241183	-0.203035	0.272987	0.0866354	0.219925		0.0688115	-0.300598	-0.164373	0.204023	0.329623	-0.00493383		-0.0172944	0.0529846	0.188909	0.333677	0.784295	-0.0880832		0.162258	0.00175263
E5RJM2	CDK16	S153	SPIFDKPLSRRLRRVSLSEIGFGKLETYIKL	Peptide218		0.190757	0.00657911	0.520628	0.323115	0.184592	0.334003		-0.277387	0.0691613	-0.0296632	0.0290789	-0.0377502	-0.0503052		0.34024	0.32977	0.0737162	0.115515	0.413779	0.0833806									0.159528	0.0442101	-0.0761671	0.131182	-0.00854901	0.132466		0.125022	0.400085	0.256598	0.0920394	0.791458	-0.138709		-0.210866	0.123152
A0A087X023	MYBPH	S13	___MMEKNTSEGPACSPEETASESAKVPTAE	Peptide219																1.40909	-0.0914254	0.493573	0.89911	0.298043	0.156669		0.271586	0.0179102	0.525629	-0.226046	-0.452767	-0.326375		-0.620548	-0.666782	-0.256516	-0.151578	0.900694	-0.394456									0.161602	-0.712535
A0A087X043	GRID2	S108	SEYDIRGIQEFLDKVSQQGMDVALQKVENNI	Peptide220		-0.13932	-0.536103	0.146012	-0.122299	0.11595	-0.056762		-0.0659166	-0.368683	0.24885	-0.153273	-0.0483597	0.00621496		-0.172559	0.356164	-0.0155189	-0.0763752	0.146724	0.0175782		-0.25186	-0.328894	-0.090682	0.0558591	-0.0430339	0.00341068																-0.0349702	-0.0420895
F8VQD8	CNOT2	S80	GIPSRTNSMSSSGLGSPNRSSPSIICMPKQQ	Peptide221																							-0.17796	-0.810097	-0.121517	-0.0280537	-0.0998543	-0.230126																-0.374366	-0.731049
A0A0U1RRH1	RYR3	S2590	DYLDTRITATLEKQISVDADGNFDPKPINTM	Peptide222																														-0.362341	-0.872233	-0.424367	-0.639693	0.779117	-0.542273		-0.541928	-0.517117	-0.452327	-0.225592	2.07705	-0.0995759
A0A087X0H9	RBM26	S127	KEEEREKKFSRRLNHSPPQSSSRYRENRSRD	Peptide223																0.0557353	0.0680803	-0.167551	0.00488897	-0.093917	-0.0220063		-0.141007	0.213934	-0.231595	-0.041837	-0.0154457	0.231973		-0.129271	0.00166543	-0.18646	-0.0832659	0.271683	-0.159893									0.0707904	0.0326553
A0A087X0H9	RBM26	S523	TKKTWFDKPNFNRTNSPGFQKKVQFGNENTK	Peptide224																																												-0.318861	-0.959988
A0A087X0I0	TNXB	S1369	LSAEGTTGLAPAGQTSEESRPRLSQLSVTDV	Peptide225		-0.259047	-1.14071	-0.300581	0.230716	0.0882414	0.126354		0.174457	-0.499862	0.245227	0.0238147	1.10368	0.0280337		-1.4556	-0.903248	-0.520232	-0.637229	-0.849888	-0.276864		0.373727	-0.467302	0.235462	0.128434	-0.0975301	-0.0613898		-0.136826	-0.575771	-0.01615	-0.297466	0.816567	-0.0228159		0.00850774	-0.180125	0.012665	0.158828	0.427195	-0.51921		0.803012	-1.26216
J3KNR0	MARK1	S238	SNEFTFGNKLDTFCGSPPYAAPELFQGKKYD	Peptide226																0.762205	-0.014719	0.826403	0.56121	0.158846	0.465066									-0.0153483	-0.195924	0.527614	0.120214	0.344591	0.361297		0.410544	0.0522201	0.676333	0.331701	0.727835	0.397208		0.150945	-0.00124568
B4DIB3	MARK1	S468	WDKDVARKLGSTTVGSKSEMTASPLVGPERK	Peptide227																																												-0.134526	-0.781313
B4DIB3	MARK1	S393	GESLSSGNLCQRSRPSSDLNNSTLQSPAHLK	Peptide228		-0.503899	-1.25801	-0.216104	-0.36367	-0.239605	-0.456031		-0.136209	-0.622124	0.1428	-0.371792	-0.199103	-0.3923
A0A087X0I9	PRKCQ	S649	NEKPRLSFADRALINSMDQNMFRNFSFMNPG	Peptide229									-0.327246	-0.67197	-0.324534	-0.249579	-0.213704	-0.494839		0.114392	-0.00383574	0.0145874	-0.127213	0.137868	-0.0725936		-0.45775	-0.700272	-0.353229	0.125689	-0.0918025	-0.241524									-0.213831	0.0434756	-0.132596	0.140334	0.0168299	-0.0783737		-0.339308	-0.0068642
A0A087X0I9	PRKCQ	S640	CSNFDKEFLNEKPRLSFADRALINSMDQNMF	Peptide230		0.614043	0.1307	0.381139	0.580766	0.24592	0.261115		0.398146	0.45294	0.438187	0.402488	0.521747	0.352201		0.292909	0.0608325	0.460825	0.253473	0.239974	0.117355		0.440102	0.226021	0.619671	0.284927	0.309615	0.480253		0.389565	0.245248	0.608456	0.455276	0.180029	0.453871		0.395195	0.184797	0.537403	0.522215	0.530212	0.366492		0.345475	0.265852
A0A087X0I9	PRKCQ	S287	EQIFREGPVEIGLPCSIKNEARPPCLPTPGK	Peptide231																							0.578309	-0.740209	0.738078	-0.142865	0.511295	0.0827552		-0.0515953	-0.237205	0.685716	-0.0722584	0.284804	0.205854		-0.15334	0.180991	0.977033	0.295617	0.779592	0.256545		-0.059847	0.162718
A0A087X0I9	PRKCQ	S334	KMCHLPEPELNKERPSLQIKLKIEDFILHKM	Peptide232									0.376343	0.442959	0.742142	0.542283	0.724445	0.580524																0.226163	0.659121	-0.00537482	0.450876	0.125224	0.337431									0.396751	0.539633
A0A087X0I9	PRKCQ	S659	RALINSMDQNMFRNFSFMNPGMERLIS____	Peptide233									0.279864	0.234418	0.226152	0.271208	0.35935	0.357566		0.123712	-0.0337147	0.259228	0.00640252	0.0317414	-0.00853685		0.357114	0.0818674	0.389849	0.153529	0.195352	0.204936		0.279564	0.0579439	0.428431	0.180427	0.0262828	0.316286		0.174367	-0.0877968	0.233979	0.207843	0.303385	0.144176		0.0433308	0.0461946
G3V1L9	TJP1	S1617	YQINNISTVPKAIPVSPSAVEEDEDEDGHTV	Peptide234									-0.215298	-0.434715	-0.0888594	-0.459809	-0.122106	-0.121803									-0.279052	-0.575997	-0.449747	-0.430634	-0.362446	-0.259485
G3V1L9	TJP1	S1619	INNISTVPKAIPVSPSAVEEDEDEDGHTVVA	Peptide235																0.313926	0.201107	0.318743	0.301516	0.148878	0.24937									-0.183176	-0.0422	-0.0362566	-0.104127	-0.0841285	0.0988611		0.128484	0.313286	0.175892	-0.046166	0.631745	0.287096		0.00451066	0.0974122
G3V1L9	TJP1	S300	ERDDISEIQSLASDHSGRSHDRPPRRSRSRS	Peptide236																							-0.296977	-0.842052	-0.237698	-0.348609	-0.144718	-0.36086									0.0147027	-0.452125	0.278343	-0.193622	0.157206	-0.219823		-0.324195	-0.680644
G3V1L9	TJP1	S212	EYGLRLASHIFVKEISQDSLAARDGNIQEGD	Peptide237																0.24057	0.00791273	-0.302681	-0.270754	-0.0596023	-0.172488		-0.0918755	0.121239	-0.0407681	-0.180928	-0.158309	-0.240809		-0.391818	-0.257395	-0.225337	-0.377286	0.729666	-0.56057
G3V1L9	TJP1	S329	RSPDQRSEPSDHSRHSPQQPSNGSLRSRDEE	Peptide238																-0.251151	-0.24146	-0.367059	-0.436479	-0.346262	-0.453329		-0.0330606	-0.12898	-0.172056	-0.272604	-0.357144	-0.480344		-0.223348	-0.24233	-0.224299	-0.316114	0.0685009	-0.47735
G3V1L9	TJP1	S125	KKVQIPVSRPDPEPVSDNEEDSYDEEIHDPR	Peptide239		0.00567868	-0.239447	-0.0869411	0.179685	0.272425	0.0143501		-0.205837	-0.480984	-0.093745	-0.122311	0.25059	-0.320101		-0.394718	-0.442526	-0.091131	-0.104037	-0.0402754	-0.208355		-0.162211	-0.456703	-0.192569	0.0367909	0.0975577	0.170744		-0.219084	-0.537951	-0.163028	-0.216552	0.477587	0.0223155		-0.10902	0.121296	0.184727	0.293126	0.42921	-0.0608119		0.234619	-0.528212
G3V1L9	TJP1	S1111	DKQPYPSRPPFDNQHSQDLDSRQHPEESSER	Peptide240		-0.0434733	-0.0762499	-0.0808517	0.0375573	0.10437	-0.0439477		0.149672	0.0638058	0.208492	-0.144399	0.0788775	-0.204246		-0.24084	-0.137181	-0.0952164	-0.187096	0.0576028	-0.130855		-0.00820916	0.0293585	-0.0150134	-0.045426	0.273492	0.0496729		-0.0833245	-0.0252057	-0.19501	0.000511773	0.34245	0.0218647									0.56379	-0.316115
G3V1L9	TJP1	S1278	SVLTRVKMFENKRSASLETKKDVNDTGSFKP	Peptide241																							0.0257193	-0.56908	0.482612	-0.259617	-0.0879358	0.0745897																0.29919	-0.864366
G3V1L9	TJP1	S1577	DLSSKTPTSPKTLVKSHSLAQPPEFDSGVET	Peptide242																														-0.47065	-0.386412	-0.25025	-0.391358	0.220874	-0.380639		-0.327079	-0.30648	-0.247862	-0.279688	0.697241	-0.202315
G3V1L9	TJP1	S1579	SSKTPTSPKTLVKSHSLAQPPEFDSGVETFS	Peptide243																																					-0.0872364	-0.145231	0.227539	-0.121535	0.776579	-0.219636		-0.0160483	-0.577002
G3V1L9	TJP1	S617	WRFRGLRSSKRNLRKSREDLSAQPVQTKFPA	Peptide244		0.602165	-0.1811	0.180679	0.67121	0.296136	0.242395									0.141408	-0.147709	0.636218	0.0850514	-0.121276	0.13717		0.395205	-0.05776	0.685587	0.312535	-0.0202136	0.22877		0.216168	-0.278509	0.464234	0.113404	0.459829	0.160176									0.721672	-0.36862
Q9BWU0	SLC4A1AP	S466	RKRKAKNWEDEDFYDSDDDTFLDRTGLIEKK	Peptide245																-0.477733	-0.701692	-0.145046	-0.445082	-0.158182	-0.224295																-0.328203	-0.544678	-0.0301788	-0.167998	0.777158	-0.296695		-0.628293	-0.798888
Q9UKX2	MYH7B	S1782	DAAMMAEELKKEQDTSAHLERMKKNLEQTVK	Peptide246									0.675324	0.493936	0.838504	0.692983	-0.692657	0.749578		0.399153	0.0311754	-0.146791	0.0931244	-0.434927	0.198425		0.359797	0.484922	0.314276	0.215376	-0.0593107	0.164105		0.276524	0.446278	0.218583	0.323202	-0.308286	0.353927									-0.114805	0.421875
M0QY96	HNRNPM	S42	GIERMGLAMGGGGGASFDRAIEMERGNFGGS	Peptide247		-0.211274	-0.468904	-0.183644	0.426308	-0.0111502	0.552006																-0.156332	-0.491015	0.376865	-0.0367178	-0.140477	0.0570338		0.188018	-0.629429	0.172503	-0.441626	0.380197	-0.386768									0.00846243	-0.170634
S4R418	BIN2	S417	SSGNIPSSPTASGGGSPTSPRASLGTGTASP	Peptide248																-1.74961	-1.55291	-0.671663	-1.44568	-0.269654	-1.04694		-1.46938	-1.62191	-0.94599	-0.867684	-0.42245	-0.493684		-0.723708	-1.25611	-1.04035	-1.01598	-0.552693	-0.592712									0.974111	-1.67144
S4R418	BIN2	S232	NKVFVVKGLSSSSRRSLVISPPVRTATVSSP	Peptide249																																												1.03238	-0.970847
A0A087X1Z5	ZBTB9	S70	QGRELRAHKAVLAAASPYFHDKLLL______	Peptide250		-0.177614	-0.80417	-0.164098	0.29545	0.152662	0.282296																-0.377049	-0.873548	-0.0817171	-0.446597	-0.36869	-0.0388116		-0.687197	-0.770749	0.104956	-0.65681	0.239684	-0.260012		0.0254567	-0.36248	0.0964069	0.306535	-0.0279309	0.0505746		-0.460851	-0.710015
A0A087X1K6	KLF13	S160	LRQRVRRGRSRADLESPQRKHKCHYAGCEKV	Peptide251																														0.243921	-0.263036	0.0822388	0.0223873	0.262683	-0.133152									0.00844235	-0.263012
A0A087X1R1	SMTN	S814	SSKKMGSIFDREDQASPRAGSLAALEKRQAE	Peptide252		0.128259	-0.919963	0.422441	0.141591	0.0897732	0.0440714		0.189826	-1.14035	-0.0602697	0.374001	-0.474745	0.359746		-0.132356	-0.515411	0.25674	-0.0322529	-0.563282	-0.182079		0.480985	-0.810905	0.452639	-0.0911144	-0.494093	-0.124327		-0.0155079	-0.9536	0.477202	0.164706	-0.0695125	-0.254321		0.25535	-0.679904	0.564529	0.416795	-0.181432	-0.105018		0.0985562	-0.893233
A0A087X1R1	SMTN	S877	AGSPGGPRAAVQRSTSFGVP NSIKQMLLD	Peptide253		-0.523286	0.177206	-0.282563	-0.398042	0.762908	-0.203941		-0.264897	0.364449	-0.366372	-0.492651	0.952253	-0.487151		-0.410166	0.322838	-0.199185	-0.59178	1.11963	-0.624241		-0.421053	0.0715172	-0.784163	0.0235765	0.824123	0.248877		-0.273077	0.164262	-0.526376	-0.292637	0.453115	0.299209		-0.0751355	0.146066	-0.782347	0.117807	0.61546	-0.119362		0.416206	-0.56961
A0A087X1R1	SMTN	S628	FSTRRRSSTGTTRSTSLMEAEPAEPLAAAVE	Peptide254		-0.646151	0.265207	0.180989	0.0692718	1.31875	0.265828		0.514873	0.833999	0.774494	0.28343	1.46218	0.823924		-0.184262	0.615362	0.12861	-0.224329	1.23091	0.181354									0.294443	0.965425	-0.169576	0.29527	0.821793	1.15188									0.347476	0.402888
A0A087X1R1	SMTN	S299	VPGSPEPPPSPPKTTSPEPQESPTLPSTEGQ	Peptide255		-0.232262	-2.58296	-1.18778	-0.242161	-0.6145	-1.18718		-2.53277	-4.21761	-3.34821	-3.29538	0.902252	-3.88386									-2.16275	-3.19058	-1.80301	-1.46495	-1.80355	-2.50822		-2.09436	-3.06621	-2.16462	-1.87324	-0.884216	-1.97931									-0.677962	-4.1212
A0A087X1U1	AGAP1	S285	SDPDKEKKGLESRADSIGSGRAIPIKQGMLL	Peptide256																-0.443849	-0.430179	-0.386662	-0.765935	-0.123912	-0.466492		-0.55921	-0.807114	-0.455681	-0.923017	-0.244407	-0.672286
A0A087X1U1	AGAP1	S414	PSISSTTSPKLDPPPSPHANRKKHRRKKSTS	Peptide257		0.102555	0.0941437	0.303638	0.0886238	-0.0438787	0.0771756									0.084179	-0.0807843	0.0861275	0.0693068	-0.071297	0.132216		0.100717	0.122303	0.165567	0.0470397	0.0315454	0.134519		0.27417	-0.0891524	0.0441489	-0.0464832	0.32465	-0.0929049									0.377391	-0.143618
P29692-2	EEF1D	S499	SSPGHRATAPQTQHVSPMRQVEPPAKKPATP	Peptide258		0.156602	0.240721	-0.171958	0.263115	-0.0932984	0.235314		0.21273	-0.0804881	-1.76965	0.352106	-0.411546	-0.216864		0.10924	-0.000466545	0.00573759	0.299616	0.224047	0.0193646		-0.154321	-0.214377	-0.424467	0.00345734	-0.0144771	-0.248019		0.0797425	-0.142786	-0.221519	-0.0471613	-0.195464	-0.373687		0.161555	0.297726	0.0543278	0.207207	0.0872849	-0.0360453		-0.105606	-0.109327
P29692-2	EEF1D	S528	TPAEDDEDDDIDLFGSDNEEEDKEAAQLREE	Peptide259		1.11535	0.0602126	1.03482	0.908159	0.462457	0.713658		0.608243	0.0774646	0.870443	0.577829	0.675865	0.686764		0.701826	0.0335306	1.11382	0.5672	0.586015	0.534563		0.703713	0.147016	1.12653	0.561188	0.669342	0.639186		0.625463	0.0679658	0.953762	0.570912	0.683675	0.701637		0.748131	0.221644	1.07414	0.590477	1.07912	0.749751		0.481562	0.270687
A0A087X2C4	PCDH7	S304	SPSMGRYRSVNGGPGSPDLARHYKSSSPLPT	Peptide260																																												-0.0447578	-0.802128
A0A087X2D8	SPAG9	S804	VPGARETDYPAGEDLSESGQVDKASLCGSMT	Peptide261																																												-0.539416	-0.603099
A0A087X2D8	SPAG9	S724	GLDTEGSKQRSASQSSLDKLDQELKEQQKEL	Peptide262																0.448833	-0.30722	0.604975	0.323515	0.0889353	0.250683		0.52276	-0.0351669	0.732487	0.352583	0.412459	0.336409		0.227378	-0.413044	0.399117	0.191667	1.14065	0.176973									0.431061	-0.144937
A0A087X2H1	HECTD1	S357	SAGSTGRIPGLRRLDSSGERSHRQLIDCIRS	Peptide263																0.443065	0.465004	-0.208242	-0.0545671	0.350783	0.0503186		-0.157779	0.391669	-0.747585	-0.151522	0.0757931	-0.02409		-0.254561	0.283608	-0.663965	-0.282055	0.193389	0.00614876									-0.190582	0.380009
A0A087X2H1	HECTD1	S358	AGSTGRIPGLRRLDSSGERSHRQLIDCIRSK	Peptide264																0.512022	0.374249	-0.140186	0.0292784	0.400339	0.0244833		0.0250897	0.566956	-0.6071	0.0522973	0.229964	0.111458		-0.0294478	0.576963	-0.635522	-0.0902762	0.207693	0.181014									0.00465328	0.356868
A0A087X2H1	HECTD1	S1537	VSSLLAAGAPMSSSASVPNLSSRETSSLESF	Peptide265																														-0.104254	-1.26761	0.0135938	-0.0514743	-0.260822	-0.345498									-0.0884921	-0.777507
A0A087X2H1	HECTD1	S1776	RRRTWDDDYVLKRQFSALVPAFDPRPGRTNV	Peptide266																-0.17775	-0.394744	0.115053	-0.413421	-0.150667	0.351458		-0.391778	-0.397579	0.0751953	-0.453785	0.0355719	0.585162		-0.26824	-0.502697	0.0934492	-0.416336	0.112969	0.38906		-0.104261	-0.237567	0.175741	-0.193135	0.323178	0.471053		-0.418805	-0.24162
A0A087X2H1	HECTD1	S1575	ART TNNMNLSRSSSDNNTNTLGRNVMSTA	Peptide267																0.320573	-0.0628942	0.0148119	0.287547	-0.174347	0.0630209		0.0725725	-0.308695	-0.0998746	-0.0501998	-0.384825	-0.385261		-0.146027	-0.884482	0.0742408	0.11151	-0.191893	-0.321232
A0A087X2H1	HECTD1	S1571	VANIART TNNMNLSRSSSDNNTNTLGRNV	Peptide268																0.0374107	-0.610059	0.112795	-0.0374147	-0.64094	-0.2575																							-0.383404	-0.925942
A0A087X2H1	HECTD1	S632	RLGVISKVSTLAGPSSDDENEEESKPEKEDE	Peptide269		0.907627	-1.31243	1.37201	0.507105	0.362243	0.310205		0.371191	-0.0230202	0.943153	0.232383	0.322815	0.486148		0.713406	-0.121542	1.02693	0.348113	0.746442	0.504812		0.666317	-0.141625	1.11959	0.359763	0.249468	-0.112904																0.216913	-0.0636967
A0A088AWL3	NCOR1	S2088	SQRGAEPAEQRNDARSPGSISYLPSFFTKLE	Peptide270																							-0.293406	-0.481697	-0.390595	-0.19386	-0.104736	-0.30608																-0.368419	-0.81546
A0A088AWL3	NCOR1	S2024	SQAQSVHHQRPGSRVSPENLVDKSRGSRPGK	Peptide271		0.218628	-0.175112	0.464081	0.286571	0.21475	0.107728		0.564767	0.431752	0.77715	0.367949	0.387588	0.564015		0.22275	0.105633	0.446976	0.107198	0.35351	0.405401		0.490602	0.168849	0.726324	0.396505	0.344207	0.335506		0.466015	0.24404	0.495719	0.404259	0.363593	0.403978									0.528515	0.0433219
A0A088AWN2	WDR20	S496	MDGAIASGVSKFATLSLHDRKERHHEKDHKR	Peptide272		-0.40099	0.112439	-0.16291	0.0380163	-0.108603	-0.111971		0.0555879	-0.378979	-0.0679556	0.0417199	0.569594	0.14951									0.0482002	-0.325302	-0.0331858	-0.102359	0.392743	-0.0131911		-0.015353	-0.238223	0.0466813	-0.161704	0.127499	-0.0434344		-0.415289	-0.036863	0.0687277	-0.0416786	0.552107	-0.409137		-0.200708	-0.275187
A0A088AWN2	WDR20	S388	RDRANSTQSRLSKRNSTDSRPVSVTYRFGSV	Peptide273																																												-0.455491	-0.56133
A0A088AWN2	WDR20	S465	TTPGNSVPPPLPRSNSLPHSAVS GSKSSV	Peptide274		0.0753928	-0.21976	0.227427	0.152557	0.3691	0.0478347									-0.0498704	0.0606518	0.193048	-0.0714515	0.362591	0.0971635		0.0311007	0.0520007	0.241856	0.221783	0.289545	0.213487		0.0384365	0.0766512	0.0482466	0.0544323	0.35435	0.285892									0.202484	-0.269278
A0A088AWP2	ERG	S183	LPHLTSDDVDKALQNSPRLMHARNTGGAAFI	Peptide275																-0.627065	0.144099	-0.429388	-0.66465	0.291518	-0.522381																							-0.453913	-0.153174
E9PDC2	PRUNE2	S2508	HEDPTANKDSGQESESIPEYTAEEEREDNRL	Peptide276																																												0.513827	-0.786478
E9PDC2	PRUNE2	S217	DSLVEHDEEFVQRQDSPRDNSERNLSLTDFV	Peptide277																0.0101854	-0.194447	0.29922	0.225208	0.102268	0.248218																0.152599	-0.163872	0.313424	-0.395498	0.74589	-0.0633721		-0.20866	-0.210818
E9PDC2	PRUNE2	S238	ERNLSLTDFVGDESPSPERLKNTGKRIPPTP	Peptide278																-0.19206	-0.687248	-0.330638	-0.0971862	-0.444037	-0.461233																-0.169036	-0.0501864	-0.169698	-0.591319	1.5777	-0.0674451
E9PDC2	PRUNE2	S340	ESWKEHKPSSIDRRASDSVFQPKSLEFTKSG	Peptide279																0.0342663	-0.104877	-0.0616802	0.291325	-0.0705311	-0.119282																-0.361353	0.212632	-0.606911	-0.508288	2.21659	-0.658961
A0A096LNH6	DOCK1	S1777	PKSQVMNVIGSERRFSVSPSSPSSQQTPPPV	Peptide280																							-0.117725	-0.140926	-0.269444	-0.17117	-0.0551359	0.142265		-0.306344	-0.373111	-0.358828	-0.453126	0.504818	0.0869728									0.0284664	-0.618751
A0A096LNU0	MCC	S294	ELQTRLQSVQATGPSSPGRLTSTNRPINPST	Peptide281																0.0237977	-0.0343931	-0.182179	-0.0103946	-0.227508	0.00242838		-0.246907	0.110561	-0.378899	-0.374888	-0.406491	-0.229717		-0.498798	-0.033735	-0.290649	-0.263043	-0.278205	-0.358901
C9JFE4	GPS1	S454	VLRNQIHVKSPPREGSQGELTPANSQSRMST	Peptide282																																												-0.433292	-0.164952
C9JFE4	GPS1	S463	SPPREGSQGELTPANSQSRMSTNM_______	Peptide283																0.484952	0.484571	0.0972618	-0.214563	0.426771	0.0741201									0.0264105	0.0536123	0.265303	-0.160952	-0.127612	-0.230442									0.0476539	0.243454
C9JFE4	GPS1	S294	ATFDRQELQRNVISSSSFKLFLELEPQVRDI	Peptide284									0.000390562	-0.41346	0.172087	-0.0372719	0.0302977	0.0513162		-0.109147	-0.301533	-0.139725	-0.273856	-0.132154	-0.137118									-0.200646	-0.0707374	0.0522649	-0.158138	0.0128627	0.0186609		-0.0037467	-0.355277	0.0348145	-0.0058886	0.346569	0.0602543
A0A096LPI0	ZNF638	S94	EFNKQKHLEAADKGHSPAQKPKTSSGTKPSV	Peptide285																0.442485	0.0092399	0.378219	0.359179	0.182253	-0.00244507		0.19064	0.138492	0.408195	0.16216	0.166373	-0.116654		0.339544	-0.0391048	0.155691	0.243084	0.21963	-0.120372									0.275013	-0.295779
J3KP36	FAM21C	S670	TKKKETVSEAPPLLFSDEEEKEAQLGVKSVD	Peptide286																														-0.523476	0.437126	-0.186559	-0.21889	-0.259014	0.176306
J3KP36	FAM21C	S483	NLKPSSETKTQKGLFSDEEDSEDLFSSQSAS	Peptide287		-0.179249	-1.28984	0.115375	0.0758248	0.200929	0.0861186																-0.304392	-0.571333	-0.256842	-0.370965	-0.286504	-0.310814																-0.185717	-0.858218
J3KP36	FAM21C	S488	SETKTQKGLFSDEEDSEDLFSSQSASNLKGA	Peptide288									-0.385639	-0.885894	-0.224889	-0.642374	-0.262849	-0.657716		-0.54158	-0.625848	-0.323931	-0.485303	-0.225129	-0.458506																-0.315039	-0.534277	-0.443032	-0.283481	0.291854	-0.227315
J3KP36	FAM21C	S975	RPQTRAARRLAAQESSEAEDMSVPRGPIAQW	Peptide289																														-0.19032	0.364456	-0.491001	-0.623915	0.451729	-0.608671									-0.333604	-0.381262
J3KP36	FAM21C	S981	ARRLAAQESSEAEDMSVPRGPIAQWADGAIS	Peptide290		-0.601761	0.36766	-0.370921	-0.13097	0.294367	-0.143154									-0.429797	-0.150389	-0.134461	-0.0091798	0.271893	-0.223569									-0.17292	-0.145973	-0.238662	-0.471951	0.24716	0.0974725									0.00641818	-0.238752
J3KP36	FAM21C	S296	EDNLFAPPKLTDEDFSPFGSGGGLFSGGKGL	Peptide291									0.0438341	-0.369003	0.0871691	0.524562	0.377977	0.521446		-0.0513378	0.632611	-0.150699	-0.416602	-0.58053	0.180493		-0.0991231	-0.119096	0.0132971	0.132509	0.0882454	1.12934		-0.259143	-0.400181	-0.0970235	0.0178929	0.202079	1.36314		0.201508	-0.206272	0.270473	0.0553833	0.539837	0.727289		0.0846096	0.0486834
J3KP36	FAM21C	S277	KPRKTLKEKKERRTPSDDEEDNLFAPPKLTD	Peptide292		0.595145	-0.208252	0.16323	0.383932	0.0842072	0.212618		0.17311	-0.128693	0.218671	0.0634472	0.0401954	-0.0287925		-0.213402	-0.427903	0.0822565	0.208688	-0.133123	0.0180079		0.151803	-0.0284436	0.225282	0.102028	0.263684	0.117103		-0.0136137	-0.343634	0.431288	-0.134138	0.656902	-0.0913422		0.313554	0.0371363	0.259116	0.307775	0.726458	0.161259		0.282409	-0.108826
J3KP36	FAM21C	S1100	GGKAKSPMFPALGEASSDDDLFQSAKPKPAK	Peptide293																-0.210992	-0.81792	0.28219	0.118456	-0.064011	-0.290156		-0.156667	-0.945007	0.147917	-0.317672	-0.0919392	-0.29477									0.00939069	-0.276981	0.261043	-0.0330264	0.482788	-0.104541		-0.352866	-0.712017
J3KP36	FAM21C	S1101	GKAKSPMFPALGEASSDDDLFQSAKPKPAKK	Peptide294																0.30611	-0.357107	0.700857	0.266686	0.0336397	0.133901		0.243352	-0.281154	0.546941	-0.00155491	0.254161	0.0792209		0.129324	-0.407681	0.495211	-0.0117323	0.559871	-0.152514		0.398717	-0.00722086	0.704858	0.408242	0.803516	0.164738		0.133931	-0.347067
A0A0A0MQR4	CIC	S1380	PEEVLPSPTLQSLATSPRAILGSYRKKRKNS	Peptide295																																												-0.144575	-0.922176
A0A0A0MQR4	CIC	S1243	PAPPPLPETWTPTARSSPPLPPPAEERTSAK	Peptide296		-0.101354	-0.899419	-0.0420947	0.0311743	-0.00720926	-0.00274275																																					-0.590704	-0.674761
A0A0A0MQR4	CIC	S1342	KKVKVRPPPLKKTFDSVDNRVLSEVDFEERF	Peptide297																																												-0.416984	-0.551937
A0A0A0MQR4	CIC	S175	IQLPLPPGKRRTQSLSALPKERDSSSEKDGR	Peptide298																							-0.110031	0.352236	-0.0514083	-0.184269	0.296799	0.148458		-0.540685	0.169681	0.0837285	-0.182775	0.414818	-0.0621031
F5H0Q6	CLASRP	S547	PSPSPAREKLTRPAASPAVGEKLKKTEPAAG	Peptide299																														-0.165608	-0.381714	-0.0327116	-0.213166	0.0309015	-0.269608
A0A0A0MTC7	LAMA4	S947	VGKHGKVFLTVPSLSSTAEEKFIKKGEFSGD	Peptide300		0.0471938	-0.224836	-0.0783065	-0.109658	0.207102	0.135459									0.0883028	0.0180666	0.100602	0.207016	-0.0551837	0.0615672																-0.340427	-0.38862	-0.252818	-0.335918	1.13061	-0.210591
A0A0A0MQT4	DCAF10	S176	LEVGSYPILRARRTTSSSDLTTSSSSSGPRV	Peptide301																-0.397329	0.0827086	-0.260313	-0.290844	0.469329	-0.27154		-0.171856	0.0975708	-0.251977	-0.172512	0.193807	-0.419015		-0.0712096	0.231223	-0.115377	-0.202702	-0.202412	-0.252512									-0.0950328	0.162108
A0A2R8Y4X0	KSR1	S448	LEAHEAEAEEPEAGKSEAEDDEDEVDDLPSS	Peptide302																							0.183399	-0.23186	0.470643	-0.0331209	0.0491902	0.215682		0.0143101	-0.51446	0.409571	-0.28311	0.684244	0.104361		0.289339	-0.29911	0.312148	0.318369	1.35175	0.37128		-0.302477	-0.39788
A0A2R8Y4X0	KSR1	S249	RIDDVSSMRFDLSHGSPQMVRRDIGLSVTHR	Peptide303		0.254971	0.130416	0.22415	0.277683	0.0927471	0.179478		0.180247	-0.107161	0.13851	-0.0386167	0.0798022	-0.0619777		0.186523	-0.0789973	0.231773	0.0579651	0.0878076	0.0312741		0.21864	-0.0785098	0.259204	0.0201419	0.0450903	0.137998		0.080643	-0.148921	0.154523	0.0604646	0.283804	0.0511433		0.201673	0.0549979	0.250266	0.105946	0.629909	0.0930808		0.0962793	0.0013105
A0A2R8Y4X0	KSR1	S321	CRISFLPLTRLRRTESVPSDINNPVDRAAEP	Peptide304		0.375139	0.284112	0.070148	0.186169	0.207304	0.0700007									0.377504	0.346095	0.31315	0.326779	0.199821	0.093426		0.159633	0.113831	0.230961	0.0556136	-0.127859	0.0174053		0.105294	-0.120809	0.221945	0.00544111	0.276656	-0.0354865									0.210581	-0.152646
A0A2R8Y4X0	KSR1	S226	VFQLLPSFPTLTRSKSHESQLGNRIDDVSSM	Peptide305																0.619853	0.500464	0.501054	0.269625	-0.0821267	0.323935		0.47426	0.224965	0.168321	0.0537311	-0.121149	0.149539		0.276626	0.0730284	0.124472	0.144376	0.162982	0.0672573									0.395853	-0.0450923
A0A0A0MR12	FAM189A2	S428	IRSRRALPPLRTRSKSDPVLHPSEERAAPVL	Peptide306		0.193706	0.469041	0.343896	-0.125779	-0.0125197	0.199386									0.656827	0.397437	0.254083	0.576275	0.263063	0.425352									-0.137423	-0.168551	-0.0234916	-0.00826081	0.369984	-0.0998023
G3V3B9	GSTZ1	S90	ERFKVDLTPYPTISSINKRLLVLEAFQVS	Peptide307									0.531334	0.0634205	0.671574	0.401042	0.390582	0.48439		-0.078213	-0.0995386	0.342996	0.0175849	0.263371	0.167855		0.282615	0.216109	0.404983	0.311499	0.423993	0.114492		0.291802	0.219506	0.292562	0.410205	0.135787	0.433885		0.19976	-0.0733337	0.292882	0.146794	0.120644	0.219106		-0.0462196	0.569264
G3V3B9	GSTZ1	S91	AERFKVDLTPYPTISSINKRLLVLEAFQVSH	Peptide308		-0.0634564	-0.444148	-0.152818	0.110081	-0.109594	0.109409		0.574981	0.0703161	0.755778	0.572217	0.473246	0.556477									0.18266	0.0659277	0.393139	0.227975	0.416974	0.283392		0.141002	-0.0820088	0.371425	0.175636	0.323244	0.297395		-0.0664676	-0.358825	0.0222282	0.00017101	0.365003	0.149756		0.0931576	0.0623787
A0A0A0MR54	SCARF1	S628	RGSEGPVRSVFRHFGSFQKGQAEAKVKRAIP	Peptide309		0.216317	-0.655795	0.192179	0.238544	0.0913059	0.152968		-0.0613536	-0.302927	0.192011	-0.0299749	0.293276	-0.116426		-0.0655137	-0.575781	0.0358519	-0.193582	0.204949	-0.365877		0.184352	-0.528363	0.111912	-0.049769	0.406456	-0.142142		-0.0107314	-0.358521	0.0235342	-5.03486e-05	0.389931	-0.0664974		0.0228001	-0.148897	0.400467	-0.0165826	0.751844	-0.371862		0.759754	-0.543413
A0A0A0MR54	SCARF1	S503	FAIPRTSSLARAKRPSVSFAEGTKFAPQSRR	Peptide310									0.0390495	0.0982957	-0.00222879	-0.518609	-0.0594534	-0.104386		0.298615	0.0595292	-0.15779	0.0550767	0.151683	0.0380057		0.0454721	-0.00512794	-0.00285185	-0.0216078	-0.122302	-0.265854		-0.178553	-0.0606872	-0.25231	0.176293	-0.00943715	-0.12593
A0A0A0MR54	SCARF1	S519	VSFAEGTKFAPQSRRSSGELSSPLRKPKRLS	Peptide311																-0.878012	-0.604342	-0.31495	-0.577697	-0.302156	-0.461716																							-0.443975	-0.544247
A0A0A0MR54	SCARF1	S520	SFAEGTKFAPQSRRSSGELSSPLRKPKRLSR	Peptide312		-0.134408	-0.543847	0.19841	-0.00650342	-0.212989	-0.0269438																							-0.305529	-0.19035	-0.180713	-0.388577	0.131964	-0.118612									-0.16786	-0.358127
C9JW01	PUM2	S136	AETDGPEKGDQKGKASPFEEDQNRDLKQGDD	Peptide313		0.275112	0.0243101	0.237147	0.259894	0.25793	0.208409									0.279841	0.0409247	0.366583	0.120617	-0.0663697	0.101538		0.0555298	-0.0619621	0.10444	0.0195681	-0.0793346	-0.0545766		-0.0418202	-0.253488	-0.00497859	-0.135804	0.489134	-0.279081									0.30162	-0.413674
C9JW01	PUM2	S182	ADCKDFNRTPGSRQASPTEVVERLGPNTNPS	Peptide314		0.143987	0.022854	0.128934	0.18725	0.164262	0.16727									0.0597382	0.0263111	0.170977	0.105411	-0.175475	0.118152		0.0131243	0.020491	0.0165852	-0.154309	-0.145731	0.0525819		-0.129418	-0.306749	-0.0580992	-0.19827	0.449772	-0.175944									0.119554	-0.164399
A0A0A0MTS7	TTN	S26782	VPVETVDAVKAAEPPSPPGKVTLTDVSQTSA	Peptide315																0.444126	0.338703	0.325243	0.352659	0.0685486	0.459434		0.090942	0.0507858	0.0980105	0.0470041	-0.0469425	0.0261611		0.021994	-0.0167889	0.223569	-0.112345	-0.174113	0.221142									0.112099	-0.0145353
A0A0A0MTS7	TTN	S32848	LERREVPKAAWYTIDSRVRGTSLVVKGLKEN	Peptide316									0.120217	0.126331	0.170059	-0.040335	0.0782408	0.144291		-0.107341	-0.14706	-0.137889	-0.0876038	-0.0176896	0.034532		0.066111	0.102729	-0.0987567	0.0639119	-0.0327738	0.0321235		0.146257	0.121259	-0.0464944	0.00503201	-0.101475	0.0761366		0.074716	-0.0699749	-0.0716747	-0.0578085	-0.186322	-0.0950441		0.101133	0.0689376
A0A0A0MTS7	TTN	S27575	VFYRACDALYPPGPPSNPKVTDTSRSSVSLA	Peptide317																							-0.268345	-0.777342	-0.146509	-0.508317	-0.671677	-0.412671									-0.402398	-0.600188	-0.323116	-0.0877099	0.336874	-0.156225
A0A0A0MTS7	TTN	S30977	PDSNLSLRADIHTTDSFSTLTVENCNRNDAG	Peptide318		0.0195304	0.102315	-0.00102502	0.0576431	0.0486205	0.141276		0.12508	-0.195446	0.382044	0.162449	0.0716137	0.200908		0.0215193	-0.355145	-0.0243128	0.0549388	-0.288608	0.0133133		0.062449	-0.108028	0.229575	0.124449	0.0761069	0.281847		-0.0604258	-0.0637628	0.14286	-0.0884101	0.553601	-0.0276321		0.12444	0.0214735	0.137017	0.161689	0.224987	-0.00087041		0.193537	-0.162176
A0A0A0MTS7	TTN	S22200	GSPIIGYLVEVKRADSDNWVRCNLPQNLQKT	Peptide319																-0.02063	-0.103653	-0.281304	-0.13436	-0.147181	-0.0929638		0.0681735	-0.119905	0.124296	-0.035777	-0.112993	-0.150504		-0.16434	-0.123574	0.0567208	-0.118733	-0.0525643	-0.040093									-0.00202113	-0.203841
A0A0A0MTS7	TTN	S20830	SPRVKIDTRADSSKFSLTKAKRSDGGKYVVT	Peptide320		0.642613	-0.526763	0.769731	0.669193	0.459805	0.472051		0.581784	0.0274282	0.853462	0.277832	0.396639	0.36913		0.401807	0.0370086	0.565235	0.334069	0.398824	0.350838		0.518626	-0.0337243	0.713565	0.417366	0.322006	0.319554		0.432856	0.121805	0.739628	0.402871	0.410209	0.371654		0.561588	0.158459	0.571586	0.419595	0.333259	0.480927		0.403809	0.277762
A0A0A0MTS7	TTN	S21520	DEVVTSSHLAVHKADSSSILIIKDVTRKDSG	Peptide321									0.301299	0.381435	0.431329	0.207863	0.317385	0.301503		-0.141787	-0.101493	0.062981	-0.226755	-0.142467	0.134104		0.30713	0.0571144	0.369128	0.192589	0.318637	0.220214		0.27283	0.0405823	0.396966	0.203659	0.20282	0.1326		0.144439	-0.063491	0.284851	0.147522	0.22778	0.0573042		0.0849459	0.0588257
A0A0A0MTS7	TTN	S21521	EVVTSSHLAVHKADSSSILIIKDVTRKDSGY	Peptide322																0.49347	0.0732298	0.650346	0.414742	0.436363	0.44132		0.0358821	-0.383818	0.136984	-0.0541028	-0.048744	-0.0867929		-0.106233	-0.210222	0.187592	-0.1291	0.0960213	-0.0959958		0.36357	-0.035419	0.438741	0.304998	0.2674	0.339225		-0.162862	-0.0350483
A0A0A0MTS7	TTN	S21522	VVTSSHLAVHKADSSSILIIKDVTRKDSGYY	Peptide323																0.164021	0.220122	0.21053	0.267539	0.147798	0.13934		0.19273	-0.378677	0.18492	-0.164161	-0.165041	-0.112184		-0.163683	-0.256443	0.276858	-0.0465079	0.111791	-0.269627		0.254234	-0.127124	0.129407	0.175561	0.196433	0.124096		-0.115836	-0.166089
A0A0A0MTS7	TTN	S34742	RYSTYHIPTKAEASTSYAELRERHAQAAYRQ	Peptide324																							-0.154717	-0.0949643	-0.142496	0.00256661	-0.194113	-0.0983642		-0.163045	-0.210054	0.108144	-0.23071	-0.149005	-0.26276
A0A0A0MTS7	TTN	S15817	SIRWDTAMTVRAEDLSATVTDVVEGQEYSFR	Peptide325																																					-0.139324	-0.313811	-0.22532	-0.0658354	-0.296521	0.065457
A0A0A0MTS7	TTN	S28653	ETSPLIRAEDPVFLPSPPSKPKIVDSGKTTI	Peptide326		0.641659	0.0279981	0.60875	0.701025	0.358992	0.574565									0.623242	0.160796	0.945855	0.635425	0.418429	0.721843									0.0102015	-0.436491	0.379254	-0.0916516	0.102385	0.0678998		0.376425	0.193835	0.70696	0.382699	0.701708	0.413785		-0.30169	-0.077746
A0A0A0MTS7	TTN	S28656	PLIRAEDPVFLPSPPSKPKIVDSGKTTITIA	Peptide327									0.36711	-0.208375	0.651964	0.0931283	0.344782	0.383508																-0.229008	-0.296173	0.334183	0.00643556	0.108017	0.197821		-0.0613766	-0.52994	-0.0765579	-0.0896166	0.0447899	0.0426078
A0A0A0MTS7	TTN	S15142	QNLEILEGEKAEFVCSISKESFPVQWKRDDK	Peptide328																														-0.134099	-0.201014	0.248041	-0.258353	0.169131	0.133194									-0.402369	-0.0427079
A0A0A0MTS7	TTN	S16845	NEAGVGHPSEPTEILSIEDPTSPPSPPLDLH	Peptide329																														-0.548413	-0.936851	-0.286748	-0.520534	0.075635	-0.229872		-0.386426	-0.647879	-0.250524	0.0843427	0.372825	-0.212121
A0A0A0MTS7	TTN	S16851	HPSEPTEILSIEDPTSPPSPPLDLHVTDAGR	Peptide330																							0.214037	0.575002	0.401754	0.0865723	0.0566587	0.407343		-0.0481493	0.556397	-0.138196	-0.375119	0.271336	0.742605									0.434068	0.263156
A0A0A0MTS7	TTN	S892	PLPQFPFADTPDTYKSEAGVEVKKEVGVSIT	Peptide331																0.639302	0.454787	0.357078	0.454819	0.0630879	0.478642									-0.386955	0.21915	0.177848	0.035329	-0.163541	0.134506
A0A0A0MTS7	TTN	S15713	DIKRKTWVLATDRAESCEFTVTGLQKGGVEY	Peptide332																0.3079	-0.451014	0.139469	-0.0477027	-0.173058	-0.102934																0.00974252	-0.261944	0.214551	-0.13555	0.194933	0.0339974
A0A0A0MTS7	TTN	S35617	EVRTHAEIKAFSTQMSINEGQRLVLKANIAG	Peptide333		-2.10474	-0.247977	-1.86859	-1.70521	0.82445	-0.461075		-1.04685	0.0603165	-1.19527	-1.39108	0.465471	-0.028926		-0.827534	-1.05788e-05	-1.44976	-1.53032	0.362186	-0.326654		-1.84556	-0.411775	-2.28701	-1.03481	0.815209	1.20336		-0.988088	-0.460691	-1.75174	-1.20632	-0.345076	1.08462		-1.10577	-0.724731	-2.44288	-1.16158	-0.254409	-0.290716		-0.559044	-1.27584
A0A0A0MTS7	TTN	S22970	GLTIKAGDTIVL ISILGKPLPKSSWSKAG	Peptide334																							-0.127411	-0.609966	0.145745	-0.108809	0.0160517	-0.042235		-0.383919	-0.461394	0.306501	-0.288085	0.161754	-0.0865608		-0.254008	-0.651423	0.24413	-0.0750024	-0.00989595	0.079869		-0.532068	-0.318649
A0A0A0MTS7	TTN	S23231	AENRAGIGPPSEASDSVLMKDAAYPPGPPSN	Peptide335		0.239853	0.0221976	0.328284	0.113037	0.230542	0.193315		0.353749	-0.042208	0.453756	0.0177387	0.230095	0.172218		0.34524	0.0913225	0.229551	0.313766	0.419054	0.357874		0.342493	0.0408405	0.368296	0.22898	0.11692	0.158538		0.208317	-0.0323411	0.437496	0.200769	0.216048	0.208011		0.225774	-0.0378977	0.173018	0.141259	0.128592	0.254535		0.361347	0.108466
A0A0A0MTS7	TTN	S31631	LDARLHGDLVTIRAGSDLVLDAAVGGKPEPK	Peptide336		0.892346	-0.788109	1.1077	1.0032	0.450201	0.714754		0.638177	-0.0499812	1.12459	0.430353	0.525215	0.607009		0.393344	-0.0190823	0.89369	0.400919	0.663733	0.675638		0.612505	-0.249884	1.25884	0.51609	0.513824	0.393119		0.578045	0.0381617	0.961343	0.518677	0.551449	0.659624		0.761292	0.0243785	1.09192	0.47121	0.415068	0.625174		0.399637	0.0205584
A0A0A0MTS7	TTN	S31231	DLTGITNQLITCKAGSPFTIDVPISGRPAPK	Peptide337		0.380797	-0.349468	0.530004	0.592682	0.309677	0.368672		0.554352	0.105731	0.756851	0.368664	0.383367	0.577952		0.261742	0.0494834	0.151461	0.196133	0.277845	0.306286		0.464885	0.0740955	0.685836	0.366288	0.365393	0.348688		0.370692	0.140165	0.616326	0.328693	0.392184	0.434201		0.401783	0.0974349	0.509712	0.252728	0.333233	0.27941		0.383775	0.232837
A0A0A0MTS7	TTN	S31240	ITCKAGSPFTIDVPISGRPAPKVTWKLEEMR	Peptide338		-0.00340477	-0.337941	0.069896	0.0434808	0.177927	0.0512929		-0.0112097	-0.401989	0.0702395	-0.409695	-0.164119	-0.233877		-0.241739	-0.0455105	0.000620874	-0.0392582	0.207212	0.154612		-0.100451	-0.404138	-0.0146269	0.0118718	-0.197182	-0.130335									0.046331	-0.189325	0.0474846	0.0258684	0.0657024	-0.0604019		-0.186096	-0.184422
A0A0A0MTS7	TTN	S21743	LEYSFRIYALNKAGSSPPSKPTEYVTARMPV	Peptide339																							0.107356	-0.0920437	0.301709	-0.0629179	-0.138522	0.00852086		-0.166743	-0.249376	0.350968	-0.00157059	-0.259617	-0.174905
A0A0A0MTS7	TTN	S23195	EKKSLRWVRAIKTPVSDLRCKVTGLQEGSTY	Peptide340																-0.0151704	0.10246	0.14913	0.0778994	0.27833	0.0724641																							-0.493609	-0.372918
A0A0A0MTS7	TTN	S28561	DPFTVPSPPTSLEITSVTKESMTLCWSRPES	Peptide341																														-0.483929	-0.65056	-0.0756952	-0.354741	0.01039	-0.14047		-0.123455	-0.308385	0.0307371	0.0897114	-0.0801797	-0.059687
A0A0A0MTS7	TTN	S32754	TKEGQDISKRAMIATSETHTELVIKEADRGD	Peptide342																							-0.485784	-0.818403	-0.307652	-0.52665	-0.26553	-0.517638																-0.477347	-0.688607
A0A0A0MTS7	TTN	S33803	RAMNYDEEVDETREVSMTKASHSSTKELYEK	Peptide343		0.209364	0.253104	0.184461	0.391254	0.333496	0.0676146									0.34925	0.544454	0.716814	0.205874	0.500827	0.359375									-0.0904993	-0.155635	0.190929	-0.273383	-0.111004	-0.101017									0.0477328	-0.0774764
A0A0A0MTS7	TTN	S19736	KVGDEEWRRANHTPESCPETKYKVTGLRDGQ	Peptide344																0.730365	0.198214	0.452504	0.459225	0.143991	0.432927		0.198651	0.0928983	0.367552	0.0405237	-0.130034	-0.0182561		0.00845341	0.0927088	0.356912	0.059663	-0.11086	0.151548									-0.0650071	0.131195
A0A0A0MTS7	TTN	S23396	DNINLKNRANIENTESFTLLIIPECNRYDTG	Peptide345																							-0.177965	-0.230933	-0.191369	-0.37984	-0.327881	-0.189722		-0.611384	-0.610248	-0.1242	-0.474907	0.0699153	-0.209334		-0.343152	-0.460758	-0.42329	-0.250814	0.163566	-0.0343187
A0A0A0MTS7	TTN	S35432	SSKPVIVTGLQDTTVSSDSVAKFAVKATGEP	Peptide346		0.522428	-0.556607	0.796661	0.586583	0.358006	0.367221		0.311197	0.0405664	0.66565	0.323768	0.274703	0.464009		0.390765	0.0875052	0.554677	0.35729	0.542846	0.437614		0.475835	-0.0259565	0.77338	0.289192	0.207493	0.273678		0.434182	0.122071	0.436774	0.324638	0.390419	0.384711		0.440673	0.114119	0.479278	0.303866	0.142798	0.348089		0.249216	0.169987
A0A0A0MTS7	TTN	S35435	PVIVTGLQDTTVSSDSVAKFAVKATGEPRPT	Peptide347																																					-0.158091	-0.655104	0.198996	0.0911996	0.47918	0.00274525		-0.98092	-0.885265
A0A0A0MTS7	TTN	S302	RHSPSPVRHVRAPTPSPVRSVSPAARISTSP	Peptide348																-0.0979898	0.110977	-0.245392	-0.250071	-0.145193	-0.0812679		-0.254414	-0.0549662	-0.275116	-0.268208	-0.213006	-0.0286904		-0.243639	0.108951	-0.274062	-0.169657	-0.371044	-0.0924505									-0.193648	0.0668457
A0A0A0MTS7	TTN	S306	SPVRHVRAPTPSPVRSVSPAARISTSPIRSV	Peptide349																							-0.2576	-0.266524	0.0942573	-0.527345	-0.422075	-0.0156706		-0.372325	-0.494069	-0.0772172	-0.427299	-0.247335	-0.265624
A0A0A0MTS7	TTN	S308	VRHVRAPTPSPVRSVSPAARISTSPIRSVRS	Peptide350		0.245855	0.0191745	0.0440155	0.156657	-0.0292125	0.217349		0.105593	-0.216387	0.0251028	0.17579	-0.0895332	0.145329		0.177534	-0.117982	0.187191	0.0694893	-0.138011	0.124661		0.166455	-0.150709	0.0872881	0.124799	-0.102541	0.152925		0.198938	-0.113968	0.148984	0.0422798	-0.034546	0.0328927		0.311942	-0.106511	0.119632	0.128285	0.114589	0.219214		0.0411411	-0.120352
A0A0A0MTS7	TTN	S27726	KAEGILTDRAQIEVTSSFTMLVIDNVTRFDS	Peptide351																-0.378521	0.220153	-0.28377	0.106359	0.116065	0.164092									-0.399464	-0.205721	-0.182041	-0.131898	-0.578411	-0.186755
A0A0A0MTS7	TTN	S27727	AEGILTDRAQIEVTSSFTMLVIDNVTRFDSG	Peptide352																-0.575744	-0.444839	-0.260491	-0.334691	0.0164637	-0.00395291		-0.52058	-0.742251	-0.409428	-0.253808	-0.417447	-0.499164									-0.164643	-0.350676	0.0112276	-0.12289	-0.0210814	-0.267654		-0.62174	-0.511576
A0A0A0MTS7	TTN	S23534	EPTETTEPVKASEAPSPPDSLNIMDITKSTV	Peptide353																0.288866	-0.106442	0.333793	0.223327	0.152127	0.215245		-0.138904	-0.432577	0.0349518	-0.0855561	-0.130526	-0.0818044		-0.256319	-0.220411	-0.10798	-0.279352	0.367723	-0.286297		0.102354	-0.0875923	0.239911	0.106294	0.360495	0.114034		-0.412236	-0.154904
A0A0A0MTS7	TTN	S23538	TTEPVKASEAPSPPDSLNIMDITKSTVSLAW	Peptide354		0.170276	-0.018466	0.480405	0.152506	0.298865	0.234681		0.276569	-0.208577	0.430209	-0.010013	-0.00486801	0.168132		0.574784	0.252738	0.299258	0.45418	0.257438	0.528095		0.251628	0.172681	0.328627	0.112704	0.0234858	0.0795832		0.0520059	0.0400263	0.374316	0.228518	0.106978	0.219067		0.257925	0.108435	-0.0688244	0.191798	0.132047	0.239529
A0A0A0MTS7	TTN	S24479	RDHGESLDKASIESTSSYTLLIVGNVNRFDS	Peptide355																-0.0714111	-0.0214014	-0.0490938	-0.0216848	0.071763	-0.0129745		-0.305187	-0.254087	-0.261985	-0.249447	-0.176132	-0.213752		-0.33546	-0.403008	-0.032324	-0.273823	-0.0332222	-0.199239		-0.0826483	-0.0802135	0.0375733	0.0890929	0.0033968	0.0752337		-0.258171	-0.216329
A0A0A0MTS7	TTN	S24480	DHGESLDKASIESTSSYTLLIVGNVNRFDSG	Peptide356									0.0709777	-0.564937	0.500963	-0.032422	0.171982	0.326034									-0.28778	-0.543394	-0.232325	-0.170191	-0.0948442	-0.283158																-0.355002	-0.54147
A0A0A0MTS7	TTN	S26269	KDAIRIDGGQYILRASNVAGSKSFPVNVKVL	Peptide357																0.355719	0.340866	0.571888	0.448455	0.438443	0.588462									0.00945649	-0.0669798	0.158861	-0.190873	-0.366428	0.0648641									-0.382651	0.0443158
A0A0A0MTS7	TTN	S26274	IDGGQYILRASNVAGSKSFPVNVKVLDRPGP	Peptide358																0.478435	0.34939	0.373305	0.300855	0.221557	0.367795		0.304341	0.195242	0.396288	0.162058	0.0690622	-0.0396966		0.192495	0.260464	0.526871	0.0836987	-0.157623	0.11993									0.16998	0.25067
A0A0A0MTS7	TTN	S16395	GSKITNYVVERRATDSEVWHKLSSTVKDTNF	Peptide359									0.000526259	-0.328418	0.240009	-0.150511	0.0413341	-0.134176		-0.161578	-0.311083	-0.107938	-0.223905	0.102956	0.117427		0.0197285	-0.460685	0.018612	-0.077519	-0.0284988	-0.101275									-0.00988951	-0.260567	0.109908	-0.11206	-0.295216	0.0153158		-0.438749	-0.18992
A0A0A0MTS7	TTN	S24383	DEWQIVTPPAGLKATSYTITGLTENQEYKIR	Peptide360									0.465282	0.119005	0.410984	0.0935579	0.348361	0.191822		0.042195	-0.0555765	0.060784	0.00206751	0.333988	0.174973		0.310214	-0.0210274	0.477414	0.132539	0.0779691	0.0670764		0.0859603	0.025543	0.395793	0.20647	-0.0391452	0.240533		-0.105968	-0.301372	-0.0924795	-0.122629	-0.0663881	0.154146
A0A0A0MTS7	TTN	S16940	VLRVRAV IGVSEPSEISENVVAKDPDCKP	Peptide361																0.31102	-0.335756	-0.0896679	-0.00218171	-0.616585	-0.0214221		-0.0391829	-0.307299	0.127145	-0.399153	-0.485294	-0.140593		-0.475793	-0.427316	-0.168136	-0.232941	-0.0169056	-0.209933		0.0222588	-0.250598	-0.00948324	-0.202781	0.493523	0.0487212
A0A0A0MTS7	TTN	S35265	PKRVKSPEPSHPKAVSPTETKPTPTEKVQHL	Peptide362		0.605912	-0.264677	0.568927	0.452013	0.540398	0.762355		0.419318	-0.209223	0.491353	0.552177	0.410095	0.763482		0.495305	0.104137	0.419364	0.425021	0.50868	0.493089		0.321196	0.105188	0.576513	0.356898	0.218002	0.958608		0.146081	0.0682282	0.540068	0.317819	0.534581	0.730746		0.330709	0.126091	0.468551	0.126483	0.63464	0.835834		0.144435	0.271838
A0A0A0MTS7	TTN	S35230	TLTIQKARVTEKAVTSPPRVKSPEPRVKSPE	Peptide363																0.036239	0.0840282	-0.0838083	0.000361994	-0.0384221	-0.014083		-0.277838	-0.131029	-0.343769	-0.191756	-0.262541	-0.15571		-0.130387	-0.0444873	-0.231091	-0.2591	-0.237979	-0.282215		0.0319393	0.0194373	-0.112846	-0.0405784	-0.0341512	-0.0382353		-0.337108	0.058971
A0A0A0MTS7	TTN	S35541	SEITPQKKAVVQEEISQKALRSEEIKMSEAK	Peptide364		-0.307898	0.333041	-0.0894245	-0.0663325	0.536472	0.0536169									0.476682	0.326006	0.433193	0.235678	0.583545	0.069304		-0.256736	0.0832032	0.140479	-0.294005	0.263174	-0.306051		-0.0396593	0.384455	0.492259	-0.499284	-0.125693	-0.199022									0.0783357	0.333169
A0A0A0MTS7	TTN	S26734	VIDKRESTRKAYANVSSKCSKTSFKVENLTE	Peptide365		0.105608	0.136655	0.443196	0.198945	0.265448	0.0443801									0.691621	0.522991	0.569963	0.475746	0.44297	0.529677		0.224696	0.036766	0.257085	0.0644398	-0.0469071	-0.155145		0.165834	0.139768	0.391565	0.0354215	-0.0223113	0.0391581									0.208816	0.108424
A0A0A0MTS7	TTN	S26735	IDKRESTRKAYANVSSKCSKTSFKVENLTEG	Peptide366		0.210839	0.215199	0.462913	0.254081	0.277068	0.0893161									0.622646	0.496146	0.458073	0.408755	0.378372	0.467334		0.220149	0.0643969	0.268021	0.0804284	-0.0234297	-0.110913		0.158632	0.0521942	0.425082	0.0347188	-0.0580419	0.0384912									0.242145	0.198166
A0A0A0MTS7	TTN	S24567	KNYIVEKRESTRKAYSTVATNCHKTSWKVDQ	Peptide367		-0.411259	-1.04766	-0.158752	-0.245357	-0.0107964	-0.0117894																-0.360019	-0.81574	-0.265429	-0.519212	-0.678207	-0.474884
A0A0A0MTS7	TTN	S28806	PDTDLRTRAYVDTTDSRTSLTIE NRNDSG	Peptide368		-0.223135	0.0348894	-0.0386483	-0.0917231	0.145407	-0.123481		-0.0765308	-0.0998995	0.0783047	-0.0683396	0.00836366	0.0730286		-0.161532	0.104896	-0.0271719	-0.124659	0.0910058	0.107618		-0.0724591	-0.00884591	-0.157886	-0.0162299	-0.0756891	0.0983118		0.00265813	-0.0150335	0.00807037	-0.0278802	0.0147485	-0.0600696		0.0267016	-0.0364732	-0.100284	-0.0291599	0.0411826	-0.29766		0.125999	-0.0235021
A0A0A0MTS7	TTN	S28809	DLRTRAYVDTTDSRTSLTIE NRNDSGKYT	Peptide369		-0.182049	-1.14669	0.0245161	-0.398844	-0.332204	-0.220055		-0.0912326	-0.405256	0.164344	0.10528	-0.345741	-0.0522116
A0A0A0MTS7	TTN	S25561	KVDGEIRDAAIIDVTSSFTSLVLDNVNRYDS	Peptide370									-0.0648418	-0.0177218	0.113611	-0.0104755	0.109729	0.0556199		-0.32499	-0.276752	-0.269427	-0.188226	0.0221174	-0.107632		-0.0868739	-0.193081	-0.0537064	0.0964157	-0.0669212	-0.0177462		-0.179521	-0.147759	-0.0422905	-0.00341873	-0.0625412	0.144785		-0.221857	-0.355782	-0.168883	-0.186846	-0.12818	0.0120078		-0.088718	-0.174391
A0A0A0MTS7	TTN	S25562	VDGEIRDAAIIDVTSSFTSLVLDNVNRYDSG	Peptide371																							-0.176185	-0.348091	-0.0358206	-0.102781	-0.0998029	-0.0747752		-0.229699	-0.491055	0.0582761	-0.271232	0.169431	-0.124187		-0.0710761	-0.368934	0.099442	0.0521788	0.0650372	0.0390956		-0.363113	-0.429874
A0A0A0MTS7	TTN	S23245	DSVLMKDAAYPPGPPSNPHVTDTTKKSASLA	Peptide372		0.127809	-0.168418	0.431056	0.222647	0.369436	0.0941117									0.482951	0.331201	0.422822	0.42404	0.372999	0.44694		0.074602	-0.0749753	0.291966	0.0558007	0.0141157	-0.0751757		0.138626	-0.0392034	0.319293	0.10773	-0.0392804	0.0271023									0.103295	-0.0624585
A0A0A0MTS7	TTN	S15280	RIRDAHLDDQANYNVSLTNHRGENVKSAANL	Peptide373		0.051434	-0.170084	0.209796	-0.0351527	0.0210865	0.0145912		0.249705	0.329456	0.298471	0.0165215	0.0103462	0.205999		-0.126605	0.156773	-0.122013	0.0112758	-0.0237318	0.0157021		0.104213	0.318131	0.0933997	0.0833919	0.0442797	0.198443		0.179282	-0.0364413	0.228476	0.101531	0.0589576	0.20513									0.211136	-0.0431256
A0A0A0MTS7	TTN	S32453	EQRDAHRPGWLPVSESVTRSTFKFTRLTEGN	Peptide374									-0.0936952	-0.458098	-0.00111466	-0.181158	-0.24519	-0.0762906									-0.355735	-0.59496	-0.0248313	-0.181662	-0.132074	-0.211646									-0.204787	-0.385554	-0.0206166	-0.0747509	-0.283952	-0.280099		-0.33311	-0.414697
A0A0A0MTS7	TTN	S22674	EAMTLKWAPPKDDGGSEITNYILEKRDSVNN	Peptide375		0.460865	-0.590544	0.74997	0.526033	0.365705	0.482644		0.579195	0.182694	0.836523	0.298096	0.423906	0.47188		0.397421	0.00220147	0.470187	0.299027	0.346348	0.357034		0.453054	-0.0211038	0.793887	0.364346	0.459887	0.324674		0.388633	0.113454	0.720643	0.393554	0.401218	0.428552		0.383283	-0.0570059	0.589424	0.299016	0.201812	0.425623		0.244599	0.264877
A0A0A0MTS7	TTN	S20202	EHMTISWQPPKDDGGSPVINYIVEKQDTRKD	Peptide376																														-0.0409523	-0.321242	0.426075	0.198414	-0.458438	0.32513									-0.59397	-0.0909264
A0A0A0MTS7	TTN	S15161	ESFPVQWKRDDKTLESGDKYDVIADGKKRVL	Peptide377		0.198831	-0.706721	0.447668	0.261562	0.126551	0.066931																0.365171	-0.223784	0.812422	0.105038	0.156629	0.267493		0.155183	-0.239121	0.837741	-0.0916001	0.376818	0.190894									0.0104075	-0.145756
A0A0A0MTS7	TTN	S2026	EAITAVELKSRKKDESYEELLRKTKDELLHW	Peptide378		0.124267	-0.0036055	0.463539	0.0184844	0.618759	0.188437		-0.00234261	1.02407	0.79299	-0.0740845	0.460792	0.0172483		0.188036	0.197419	0.311408	0.1028	0.754462	0.0948044		0.226735	0.124509	0.534795	0.176122	0.784015	0.156717		0.229473	0.412507	0.368623	0.394519	0.507715	0.107144		0.112236	0.342225	0.231891	-0.0653588	0.392937	0.240828		0.0699609	0.361343
A0A0A0MTS7	TTN	S25112	TGAITARDEVDPPRISMDPKYKDTIVVHAGE	Peptide379		0.0266811	0.0801647	0.619826	-0.152217	0.293532	0.0185309		0.774111	0.324426	0.689729	0.0912979	0.0963504	0.379		0.773532	0.4588	0.342464	0.476249	0.577885	0.672652		0.472644	0.375375	0.707011	0.340487	0.0653059	0.0715021		0.293389	0.400841	0.764284	0.504447	-0.193598	0.234444
A0A0A0MTS7	TTN	S34729	QAHVKVEETRKDFRYSTYHIPTKAEASTSYA	Peptide380		0.0954945	-0.0812415	-0.0840998	0.444252	-0.0514304	0.432731																-0.226508	-0.339481	-0.00906376	0.0741392	-0.0602866	0.240838		0.0253568	-0.314258	0.00280388	-0.289853	0.231763	-0.0454967		0.206289	-0.0713418	0.218452	0.182838	0.509955	0.176376		-0.292897	-0.211278
A0A0A0MTS7	TTN	S15889	SSVQLKWEPPLKDGGSPILGYIIERCEEGKD	Peptide381																														0.115828	-0.180309	0.153481	-0.0668108	-0.0741752	0.286844		0.282159	-0.0171208	0.137846	0.231899	0.430605	0.134088		-0.356015	0.17725
A0A0A0MTS7	TTN	S16681	NTADLKWTVPEKDGGSPITNYIVEKRDVRRK	Peptide382																																												-0.857642	-0.371034
A0A0A0MTS7	TTN	S30175	KPSISWLKDGLPLKESEFVRFSKTENKITLS	Peptide383									0.119779	-0.0665932	0.502751	0.268404	0.128526	0.356926									0.0400916	-0.684075	0.256535	0.105634	0.0147258	-0.133176																-0.326389	-0.56817
A0A0A0MTS7	TTN	S2398	SVEGVWMKDGQEVQPSDRVHIVIDKQSHMLL	Peptide384		0.0566146	-1.46681	0.0684878	0.206929	-0.223469	0.0253365		-0.3409	-0.635485	0.248064	0.179418	-0.0485632	-0.0163434																							0.0982401	-0.372152	0.0871926	-0.087132	-0.225055	-0.240269		-0.620075	-0.261029
A0A0A0MTS7	TTN	S57	DGQVISTSTLPGVQISFSDGRAKLTIPAVTK	Peptide385									0.104778	-0.513407	0.0398523	0.103164	0.28633	-0.0660752		-0.396984	-0.151756	-0.258659	-0.0967221	-0.00807173	-0.0615875		-0.102821	-0.365119	0.00888094	-0.0593361	0.0475984	-0.0359151		-0.0910187	-0.128538	-0.0208534	0.0110983	-0.0483419	-0.110199		-0.0356034	-0.145931	-0.0882081	-0.0315093	-0.112294	-0.0803321		-0.211384	-0.136747
A0A0A0MTS7	TTN	S59	QVISTSTLPGVQISFSDGRAKLTIPAVTKAN	Peptide386									0.0171353	0.0205732	0.193417	0.101309	0.174872	0.10499		-0.1727	-0.117699	-0.212246	-0.102186	0.0205784	0.0326778		0.0804493	-0.132416	0.0366261	0.0553616	0.104833	0.0147494		0.00146449	-0.00719049	0.150542	0.134629	-0.0698091	-0.0358758		-0.00725476	-0.110325	-0.0175511	-0.0923292	-0.0579068	-0.00855852		-0.204399	0.00797596
A0A0A0MTS7	TTN	S24469	GRPAPEVKWARDHGESLDKASIESTSSYTLL	Peptide387																0.894921	0.421112	0.97634	0.704005	0.667075	0.77621		0.490304	0.0572971	0.824743	0.264049	0.232808	0.0684679		0.373176	0.098124	0.795449	0.283957	0.133836	0.328327									0.0911602	0.108418
A0A0A0MTS7	TTN	S27964	QLGVPVIARDIEIKPSVELPFHTFNVKAREQ	Peptide388		0.286476	0.678356	0.0848686	0.209655	-0.0147337	0.371258		0.285399	0.0395203	0.413403	0.166132	0.261565	0.205645		0.409473	-0.0291186	0.676543	0.441656	0.298854	0.450251		0.300688	-0.125223	0.629347	0.248153	0.34368	0.291855		0.156006	-0.166789	0.547602	0.281195	0.329028	0.370899		0.28421	-0.17658	0.378638	0.203086	0.465295	0.25265		0.142734	-0.0150898
A0A0A0MTS7	TTN	S17057	VKVIGLPGPCKDIKASDITKSSCKLTWEPPE	Peptide389																														0.0497142	-0.402206	0.656966	-0.222857	-0.025937	0.105495									-0.57294	-0.193187
A0A0A0MTS7	TTN	S22991	LPKSSWSKAGKDIRPSDITQITSTPTSSMLT	Peptide390									0.402245	0.20757	0.347222	0.276248	-0.147497	0.617997		-0.0937283	-0.11136	0.0485862	-0.0873471	-0.0870021	0.0231773		0.134615	-0.251746	0.346317	0.286418	0.145361	0.265134		0.137718	-0.0076097	0.23295	0.181393	0.0597158	0.250809									-0.0562501	-0.0160199
A0A0A0MTS7	TTN	S22998	KAGKDIRPSDITQITSTPTSSMLTIKYATRK	Peptide391		0.187414	-0.106429	0.336706	0.331303	0.277962	0.31821		-0.0863939	-0.11119	0.181046	-0.0278275	-0.0939284	0.124029		0.382127	0.0791265	0.44404	0.365815	0.310154	0.411551		0.186957	-0.132385	0.225229	0.185822	0.0479857	-0.0587173		0.0601475	-0.0757218	0.254408	0.105376	0.204234	0.10118		0.207928	-0.0409083	0.286306	0.336191	0.0334514	0.284485		0.0960232	0.0420654
A0A0A0MTS7	TTN	S19887	VLVLDKPGPPRDLEVSEIRKDSCYLTWKEPL	Peptide392																0.277801	-0.0318255	0.337329	0.293982	0.222119	0.285425									-0.189406	-0.373314	-0.0345243	-0.120074	-0.240369	-0.160247		0.153936	-0.126914	0.187437	0.0337245	-0.143097	0.109213		-0.609622	-0.161154
A0A0A0MTS7	TTN	S18489	VKVMDVPGPPKDLKVSDITRGSCRLSWKMPD	Peptide393		0.331098	-0.251123	0.525809	0.31159	0.269878	0.245313		0.523604	-0.179535	0.663905	0.103792	0.249656	0.184961		0.472278	0.267377	0.311271	0.370975	0.420131	0.324021		0.378421	0.15782	0.554231	0.242141	0.0650424	0.0854479		0.254975	0.252198	0.498239	0.158755	0.271257	0.182953		0.330504	0.0724957	0.240951	0.212033	-0.0943727	0.343001
A0A0A0MTS7	TTN	S14559	MQDEGKTHSITFKDLSIDDTSQIRVEAMGMS	Peptide394		0.476755	0.237185	0.486965	0.42987	0.697126	0.279677		0.753582	0.633472	0.873146	1.21393	0.87219	1.41554		0.60056	0.251228	0.541029	0.503006	0.48187	0.2736		0.511261	0.68182	0.932772	0.641999	0.795863	0.841946		0.758969	0.772705	0.641621	0.465109	0.515915	1.21796		0.43312	0.408743	0.618783	0.380101	0.275279	0.340017		0.707937	1.11327
A0A0A0MTS7	TTN	S21425	QPADRWTEYSVVKDLSLVVTGLKEGKKYKFR	Peptide395																-0.089869	-0.208448	-0.0377749	-0.198496	-0.0477185	-0.013174		-0.216532	-0.786989	-0.282802	-0.557797	-0.577935	-0.808735
A0A0A0MTS7	TTN	S26881	VLGVPVIAKDLTIQPSLKLPFNTYSIQAGED	Peptide396		0.0793206	-0.505915	0.290377	0.113127	0.193199	0.218649		0.359512	-0.403567	0.62738	-0.235991	0.222581	0.0208277		0.114995	-0.20546	0.00721724	-0.16707	0.0592575	0.0226553		0.289906	-0.229115	0.520606	0.00700771	-0.0350716	-0.0960225		-0.0625124	-0.162009	0.320923	0.0238046	0.262616	0.0726941		0.110147	-0.194781	0.0924092	0.0528679	0.313771	0.118073
A0A0A0MTS7	TTN	S25805	VAKDLVIEPDVKPAFSSYSVQVGQDLKIEVP	Peptide397		0.0101157	-1.81965	0.535273	0.0189485	0.00361593	-0.0301371		0.665706	0.137558	1.05221	0.458924	0.467275	0.538975									0.401703	-0.398166	0.792382	0.312204	0.23669	0.0385442																-0.0474578	-0.076281
A0A0A0MTS7	TTN	S25806	AKDLVIEPDVKPAFSSYSVQVGQDLKIEVPI	Peptide398																0.765917	0.0842038	1.10805	0.712942	0.634966	0.823534									0.0191467	-0.254884	0.348845	0.021942	0.107463	0.255129		0.422952	0.172708	0.671889	0.446971	0.524202	0.378455		-0.286316	0.0291603
A0A0A0MTS7	TTN	S25808	DLVIEPDVKPAFSSYSVQVGQDLKIEVPISG	Peptide399																0.588193	0.270032	0.784731	0.546948	0.53509	0.643379		0.324409	-0.495136	0.65076	-0.00218444	0.208796	0.0525089		0.0725592	-0.352519	0.587628	-0.0408927	0.399579	0.249782		0.471988	-0.145063	0.741339	0.479315	0.557962	0.528337		-0.0963964	-0.0992526
A0A0A0MTS7	TTN	S33000	PASEPVVCKDPFDKPSQPGELEILSISKDSV	Peptide400																0.162823	-0.417709	0.619563	0.118459	0.304371	0.265236																0.192434	-0.379378	0.551703	-0.0914785	-0.118819	0.105083		-0.7715	-0.468462
A0A0A0MTS7	TTN	S33009	DPFDKPSQPGELEILSISKDSVTLQWEKPEC	Peptide401		0.710322	-0.80755	0.990504	0.890822	0.464576	0.629317		0.724602	0.0714159	1.07684	0.362863	0.526853	0.582408		0.484399	0.00751037	0.638079	0.266074	0.448824	0.504098		0.608742	0.00890899	0.924421	0.519501	0.497001	0.394691		0.480884	0.150817	0.817321	0.515262	0.558538	0.573659		0.628136	0.104745	0.834338	0.443975	0.303787	0.563462		0.437272	0.255888
A0A0A0MTS7	TTN	S33011	FDKPSQPGELEILSISKDSVTLQWEKPECDG	Peptide402		0.726449	-1.56984	0.74512	0.943157	0.101511	0.526447		0.502424	-0.0392583	0.950338	0.695583	0.56175	0.702714																0.334794	-0.109929	0.715526	0.289159	0.532836	0.481225		0.557392	-0.118166	0.705451	0.489641	0.120951	0.513026		-0.0882538	0.156526
A0A0A0MTS7	TTN	S18687	ATVGPVTVKDQTCPPSIDLKEFMEVEEGTNV	Peptide403		0.152673	-0.819172	0.21583	0.240825	-0.0136398	0.140388																							-0.0999106	-0.172357	0.40344	-0.18475	-0.0744233	0.0963396									-0.252357	-0.0301255
A0A0A0MTS7	TTN	S19089	PGEVTDVIEMKDRLVSPDLQLDASVRDRIVV	Peptide404									0.122281	0.134498	0.204996	-0.0245609	0.0626166	0.0990902		-0.248647	-0.148879	-0.107747	-0.0874452	0.0157541	-0.0913436		0.0272975	-0.0389228	0.00449745	0.063555	0.134206	0.0414687		-0.0199841	0.0689597	0.034085	0.0271093	0.0802253	-0.0133647		-0.118872	-0.168219	-0.0770114	-0.0741431	0.0676485	-0.112886		-0.06361	-0.0958557
A0A0A0MTS7	TTN	S19097	EMKDRLVSPDLQLDASVRDRIVVHAGGVIRI	Peptide405																							-0.504897	-0.643775	-0.645488	-0.291867	-0.232142	-0.409284									-0.347761	-0.610353	-0.215245	-0.331265	-0.174692	-0.260079		-0.49038	-0.73212
A0A0A0MTS7	TTN	S24097	DFSTNLVNKDSTRRDSGAYTLTATNPGGFAK	Peptide406		0.368787	-0.231552	0.470431	0.371796	0.210528	0.48293		0.15692	-0.123869	0.22199	0.17356	0.338995	0.308032		0.237609	-0.16369	0.414779	0.135212	0.243906	-0.0242578		0.145499	-0.134976	0.390651	0.200892	0.259834	0.304228		0.254339	-0.0511771	0.272831	0.178283	0.255414	0.240871		0.349825	0.17066	0.46075	0.344896	0.501118	0.105496		0.00602922	-0.0462595
A0A0A0MTS7	TTN	S21931	RNLCTLELFSVNRKDSGDYTITAENSSGSKS	Peptide407																							0.20498	-0.0221304	0.673685	0.148541	0.112819	0.0970651		0.123158	-0.0735204	0.505707	0.0719445	-0.12341	0.182963
A0A0A0MTS7	TTN	S21941	VNRKDSGDYTITAENSSGSKSATIKLKVLDK	Peptide408		0.452568	-0.0633944	0.533341	0.492051	0.426649	0.455558		0.540476	0.0938577	0.791445	0.183516	0.27723	0.43826		0.57944	0.157744	0.580624	0.458677	0.558778	0.550246		0.567377	0.0965166	0.72328	0.368729	0.387528	0.188066		0.364368	0.15682	0.7119	0.381572	0.389209	0.355207		0.38488	-0.00125035	0.607241	0.284006	0.192534	0.461325		0.317899	0.399189
A0A0A0MTS7	TTN	S21534	DSSSILIIKDVTRKDSGYYSLTAENSSGTDT	Peptide409		0.483389	-0.444195	0.826475	0.651795	0.390697	0.56868		0.614002	-0.00752832	0.862633	0.431137	0.380508	0.486891		0.424257	-0.200363	0.643012	0.324688	0.350157	0.365633		0.437913	-0.0227561	0.848687	0.402844	0.505887	0.452893		0.280961	-0.045766	0.717723	0.453603	0.637141	0.461141		0.402521	0.280037	0.661287	0.300821	0.533829	0.283032		0.307881	0.233208
A0A0A0MTS7	TTN	S21538	ILIIKDVTRKDSGYYSLTAENSSGTDTQKIK	Peptide410		-0.00452728	-1.31087	0.370269	0.505206	0.162856	0.278586		0.703582	-0.367334	0.963156	0.267654	0.61257	0.575897									0.357886	-0.193485	0.580876	0.111688	0.261032	0.277361		0.137707	-0.320191	0.490599	0.06897	0.432111	0.332999		0.0455601	-0.124706	0.372474	0.269563	0.389379	0.137734		0.0962895	-0.0523068
A0A0A0MTS7	TTN	S21544	VTRKDSGYYSLTAENSSGTDTQKIKVVVMDA	Peptide411		0.301238	-0.609574	0.490361	0.46456	0.227074	0.33361		0.107957	-0.49546	0.487593	-0.0724163	0.0545587	0.10625		0.066079	-0.131019	0.243233	0.0604694	0.230842	0.200895		0.230219	-0.401509	0.295547	0.0440233	0.122889	0.0869602									0.33322	-0.0731985	0.476683	0.147606	0.191779	0.220831		0.014125	-0.0801912
A0A0A0MTS7	TTN	S21545	TRKDSGYYSLTAENSSGTDTQKIKVVVMDAP	Peptide412									-0.033469	-0.703639	0.483711	-0.234861	0.251577	-0.155502		-0.712788	-0.724159	-0.147288	-0.565902	-0.159551	-0.408501		-0.0479934	-0.78005	0.194719	-0.23053	0.0297069	-0.122873									-0.0043258	-0.580312	0.18991	-0.109006	0.189682	-0.0906025		-0.434772	-0.593981
A0A0A0MTS7	TTN	S24934	LSSRDSMEVQWNEPISDGGSRVIGYHLERKE	Peptide413																0.206627	0.0431611	0.347577	0.344852	0.213737	0.381796									-0.221655	-0.272475	0.0854325	-0.212145	-0.0953784	0.0516261		0.183052	-0.0692071	0.133546	0.143999	0.17388	0.0970195		-0.300757	0.150605
A0A0A0MTS7	TTN	S20154	KNCLRRDTGEYQITVS AGSKTVAVHLTVL	Peptide414		-0.0160005	-0.429981	0.445005	0.0908722	0.223575	0.125447		0.344728	0.215642	0.665607	0.206324	0.160663	0.389212		0.100115	0.079122	0.126604	0.165672	0.248175	0.304133		0.250652	0.116266	0.379738	0.239613	0.248146	0.200718		0.375017	0.135297	0.275183	0.238499	0.187985	0.204035									0.285919	0.0181271
A0A0A0MTS7	TTN	S20159	RDTGEYQITVS AGSKTVAVHLTVLDVPGP	Peptide415		0.309566	-0.197523	0.483312	0.443919	0.132456	0.2815		0.485204	0.132504	0.795206	0.407356	0.410262	0.587676		0.279248	-0.0150344	0.423373	0.20403	0.419905	0.357837		0.351736	0.162036	0.57185	0.276141	0.41901	0.469637		0.339442	0.166485	0.647504	0.372702	0.284889	0.467767		0.262234	0.124445	0.512232	0.267456	0.0202385	0.118985		0.314083	0.171704
A0A0A0MTS7	TTN	S24852	GGSSINNYIVEKRDTSTTTWQIVSATVARTT	Peptide416									0.0668396	-0.223662	0.299278	-0.286378	0.037675	0.0835874									-0.134674	-0.408747	-0.0979719	-0.240509	-0.192696	-0.344941
A0A0A0MTS7	TTN	S24860	IVEKRDTSTTTWQIVSATVARTTIKACRLKT	Peptide417																-0.0297887	-0.189732	-0.000117119	-0.0928299	0.148615	-0.0456441		-0.441676	-0.953802	-0.614255	-0.531384	-0.598151	-0.52868									-0.353381	-0.366334	-0.260285	-0.136416	-0.20124	-0.277452
A0A0A0MTS7	TTN	S19925	TNYVVERRDVASAQWSPLSATSKKKSHFAKH	Peptide418									-0.229252	-0.572525	0.0905636	0.269936	0.224302	0.16337																							-0.277296	-0.802955	-0.0977274	-0.318358	-0.182532	-0.193231		-0.548605	-0.331498
A0A0A0MTS7	TTN	S19928	VVERRDVASAQWSPLSATSKKKSHFAKHLNE	Peptide419																-0.0245071	-0.0894952	0.189939	0.129387	0.196696	0.256137									-0.27146	-0.431027	-0.237752	-0.36597	-0.282549	-0.1091
A0A0A0MTS7	TTN	S2148	VCELVIRDVTAEDSASIMVKAINIAGETSSH	Peptide420		0.243831	-0.299361	0.586151	0.111497	0.455998	0.0346103		0.226596	0.0861044	0.575205	0.196867	0.173321	0.381237		0.326227	0.231415	0.352964	0.270387	0.448399	0.518114									0.298528	0.339426	0.399872	0.21673	0.00203465	0.330772									0.201833	0.264478
A0A0A0MTS7	TTN	S1068	EKRFVESRDVVMTDTSLTEEQAGPGEPAAPY	Peptide421									0.417174	0.324612	0.699556	0.376705	0.416154	0.471065		-0.202831	-0.53171	-0.204727	-0.0655668	0.0805454	-0.139965		0.130336	0.154446	0.288844	0.132332	0.687683	0.197971		0.0213136	0.23942	0.226601	0.276769	0.294088	0.271402		-0.122648	-0.174103	-0.00706922	-0.183157	0.372906	-0.204623		-0.0599577	0.436956
A0A0A0MTS7	TTN	S34515	KEALREAAVLYKPAVSTKTVKGEFRLEIEEK	Peptide422		0.164838	-0.459136	0.581363	0.144598	0.405275	0.282163		0.817535	0.506245	1.14425	0.453318	0.362603	0.766974		0.594496	0.265773	0.382805	0.248094	0.341269	0.367421		0.605392	0.348602	0.801746	0.448855	0.450911	0.25447		0.678135	0.499716	0.620449	0.524143	0.0714598	0.568301									0.599742	0.37237
A0A0A0MTS7	TTN	S32770	ETHTELVIKEADRGDSGTYDLVLENKCGKKA	Peptide423		0.281579	-0.675196	-0.0523606	0.134283	-0.0546552	0.0832057		0.0773106	-0.349587	0.137289	0.166243	0.0979324	0.0972241																-0.0670152	-0.490476	0.365899	-0.0953241	0.040424	0.147798		0.187631	-0.418571	0.006386	0.116374	-0.109949	0.276067
A0A0A0MTS7	TTN	S31202	KAKNDAGYSEPREAFSSVIIKEPQIEPTADL	Peptide424																0.530613	0.406797	0.536048	0.722156	0.332937	0.37497		0.321944	0.0222479	0.230105	0.102062	-0.137515	-0.197821		0.221384	0.245657	0.345533	0.159304	-0.419225	-0.0268998									0.0659174	0.323515
A0A0A0MTS7	TTN	S31203	AKNDAGYSEPREAFSSVIIKEPQIEPTADLT	Peptide425									0.566112	0.290854	0.568425	0.607426	0.522057	0.399483		0.0257445	-0.196798	0.155207	0.0248036	0.122629	0.105923		0.385822	0.0323979	0.476724	0.416946	0.305558	0.271874		0.420789	0.188041	0.5497	0.291818	0.131513	0.350523		0.17693	-0.0870355	0.170513	0.221273	-0.105342	0.184334		0.195678	0.295561
A0A0A0MTS7	TTN	S2426	MLLIEDMTKEDAGNYSFTIPALGLSTSGRVS	Peptide426									0.186384	0.00437951	0.344044	0.0866745	0.222626	0.197269		-0.000685001	-0.324182	-0.0389649	-0.071593	-0.00498045	0.1525		0.0902877	-0.0930424	0.238017	0.0461481	0.230041	0.12932		-0.100406	-0.0979945	0.269428	0.11247	0.0854056	0.304298		-0.0681736	-0.180231	0.0964825	-0.012887	0.0649712	0.174615		-0.022901	0.107614
A0A0A0MTS7	TTN	S2435	EDAGNYSFTIPALGLSTSGRVSVYSVDVITP	Peptide427									0.0578904	-0.304108	0.297668	-0.238807	0.130934	0.164568		-0.524481	-0.413993	-0.406629	-0.432237	-0.195887	-0.273652		0.0088847	-0.216147	-0.0129534	-0.0782818	-0.0134573	-0.0025392		-0.157444	-0.118411	-0.0745976	-0.169544	0.150192	-0.0426437		-0.0452131	-0.240819	-0.087815	0.0548604	0.192809	-0.0565845		-0.0966511	-0.209254
A0A0A0MTS7	TTN	S2437	AGNYSFTIPALGLSTSGRVSVYSVDVITPLK	Peptide428		-0.272382	0.00119025	0.172381	0.275953	0.242045	0.179586									-0.0549729	0.127125	0.188337	0.1212	0.15987	0.220647		-0.195653	-0.346372	-0.235079	-0.247131	-0.231938	-0.147449		-0.35746	-0.41191	-0.0232785	-0.427368	0.17267	-0.189938		0.0825547	-0.115003	0.122216	0.303487	0.288045	0.0679972		-0.245559	-0.335952
A0A0A0MTS7	TTN	S34788	LLRPVTTTQHLSEYKSELDFMSKEEKSRKKS	Peptide429		0.272676	-0.952712	0.247407	0.0676942	-0.101709	0.284455		0.0132362	-0.408968	0.241216	-0.0877178	0.0907332	0.0788195																-0.354938	-0.288776	0.289003	-0.307573	0.188853	0.0672173		-0.0855741	-0.391386	0.168265	0.0681386	0.826623	0.153998
A0A0A0MTS7	TTN	S1523	KEDGTQSLIIVPATPSDSGEWTVVAQNRAGR	Peptide430																																					-0.192017	-0.619855	-0.282995	-0.325726	-0.141806	-0.139264
A0A0A0MTS7	TTN	S18048	PKAVREDKGTYTVTASNRLGSVFRNVHVEVY	Peptide431		-0.256764	0.146931	-0.0379042	-0.0981586	0.039588	-0.0922913		0.01343	-0.0759935	0.0787316	-0.219102	-0.124571	-0.143107		-0.057687	0.12488	-0.0877914	0.0497261	0.063704	0.0888563		-0.147524	-0.0248801	-0.147329	-0.00030589	-0.133688	-0.0404174		0.0451496	0.0181492	0.0668162	-0.109585	-0.0650598	-0.188255		0.11191	0.140699	-0.0856419	-0.078931	-0.322389	-0.140345		0.0836268	-0.0830592
A0A0A0MTS7	TTN	S28758	QIAKEREEEPLFDIDSEMRKTLIVKAGASFT	Peptide432		0.262546	-0.0507771	0.31015	0.201084	0.238331	0.213283		-0.0210226	-0.0437814	-0.00408902	0.0753805	0.131377	0.157956		0.263297	-0.00715449	0.303173	0.277311	0.270748	0.253447		0.131182	-0.152108	0.246278	0.0230695	0.116632	0.286759		0.00723979	-0.0960319	0.31511	0.0358539	0.125539	0.302697		0.190674	0.00463146	0.347405	0.195438	0.162955	0.268891		0.224771	-0.166485
A0A0A0MTS7	TTN	S3280	RPQPKISWYKEEQLLSTGFKCKFLHDGQEYT	Peptide433		0.291532	-1.18892	0.265756	0.478511	-0.0445469	0.247037		0.258596	0.00368195	0.802236	0.678911	0.488991	0.590243																0.368023	-0.155576	0.582699	0.00618113	0.287255	0.383573		0.212628	-0.273845	0.36165	0.151632	-0.0123296	0.207576		-0.189434	0.153865
A0A0A0MTS7	TTN	S21134	C AAQLVRKEFTVTSLDENQEYEFRVCAQN	Peptide434									0.0686849	0.175249	0.0617174	0.127332	0.0911275	0.132348		0.148031	-0.10107	-0.0235926	0.0664958	-0.014473	0.0855146		0.011234	0.120591	0.019712	0.118456	0.00553177	0.0602295		0.0174499	0.129225	0.0267446	0.233331	-0.15379	0.0637823		0.0101104	-0.0916799	-0.0871136	-0.0181373	-0.158691	0.0121061		-0.0743371	0.194222
A0A0A0MTS7	TTN	S2575	GIDVLWNFKDKEIKPSSKYKIEAHGKIYKLT	Peptide435		0.112594	-2.10957	0.728131	0.514119	0.195296	0.0929499																0.183017	-1.27302	0.648648	-0.199247	-0.328736	-0.288782																-0.430538	-0.81882
A0A0A0MTS7	TTN	S2576	IDVLWNFKDKEIKPSSKYKIEAHGKIYKLTV	Peptide436		0.965842	-0.237446	1.33482	0.843148	0.59066	0.510523									1.15981	0.811675	1.31344	1.00247	1.02319	1.02543		0.554249	0.308606	0.946939	0.272849	0.498528	-0.00673894		0.459484	0.163069	1.14107	0.433433	0.236298	0.445505									0.362272	0.33666
A0A0A0MTS7	TTN	S21179	KPKEILEPPEIDLDASMRKLVIVRAGCPIRL	Peptide437																0.201048	0.0742012	0.0715424	0.274351	0.0264414	0.170309									-0.261493	-0.125334	0.146575	-0.0919167	-0.455742	-0.232202
A0A0A0MTS7	TTN	S33865	VKVKGTDQVLVKKEISILNIARHRNILHLHE	Peptide438		-0.0205841	-0.0921693	0.137422	0.252454	0.121697	0.164663		0.0666244	0.0603017	0.167311	0.0541776	0.18338	0.0505357		-0.0129668	0.147525	0.160909	0.12169	0.358162	0.139129		0.10132	-0.0347694	0.136824	0.041887	0.114846	0.03614		0.0866043	0.0885346	0.232233	0.0662554	0.0768601	0.132874		0.198252	0.0304463	0.13181	0.11489	-0.124583	0.135576		0.0113913	0.15452
A0A0A0MTS7	TTN	S14513	KFLTPLKDVTAKEKESAVFTVELSHDNIRVK	Peptide439									0.426028	0.285891	0.451218	0.0732776	0.0411488	0.27314		0.128665	-0.0920145	-0.0849672	0.139856	0.131142	0.185072		0.308235	0.186419	0.381804	0.0524892	-0.0449516	0.0855225		0.0679274	0.137107	0.173452	0.276129	-0.14269	0.0446876
A0A0A0MTS7	TTN	S20464	AANIVGEGEPRELAESVIAKDILHPPEVELD	Peptide440		0.101917	-0.693107	0.0852406	0.225694	0.0137477	0.0659202		0.320287	0.0790407	0.679082	0.283587	0.363153	0.229303									0.255186	-0.18482	0.421041	0.173671	0.21365	0.122012		0.15161	-0.242152	0.520606	0.065755	0.322933	0.0950649		0.152343	-0.278243	0.181426	0.209972	-0.0649299	0.056307		-0.0722858	-0.0824118
A0A0A0MTS7	TTN	S30134	PITVKELIITPEVDLSDIPGAQVTVRIGHNV	Peptide441																														-0.356516	-0.470374	-0.0780278	-0.356212	-0.138408	-0.300095		-0.175131	-0.346704	-0.288877	-0.16898	-0.361562	-0.0256068
A0A0A0MTS7	TTN	S14415	NLKVKELPLIFITPLSDVKVFEKDEAKFECE	Peptide442									0.442691	0.243559	0.534437	0.372503	0.386522	0.461729		0.180846	-0.265507	0.168162	0.173882	0.0659079	0.189958		0.33344	0.13301	0.395004	0.251659	0.328071	0.262626		0.167159	0.0594786	0.533373	0.242902	0.249201	0.280657		0.133432	-0.279449	-0.032163	0.0140196	-0.116934	0.289126		0.0625718	0.0545886
A0A0A0MTS7	TTN	S847	ASIAGSAIATLQKELSATSSAQKITKSVKAP	Peptide443		0.280541	-0.397298	0.39035	0.233897	0.594282	0.22814		0.70546	-0.684911	0.62636	-0.209436	0.218449	-0.131547		0.278433	-0.528261	0.0629903	-0.330514	0.251691	-0.324793		0.282009	-0.397173	0.506411	0.16053	0.620927	0.0468603		0.355319	-0.510606	0.0902563	-0.27847	1.13685	-0.327304		0.268384	0.147172	-0.0634118	-0.0775704	1.50778	-0.0517755		0.151987	-0.0616207
A0A0A0MTS7	TTN	S851	GSAIATLQKELSATSSAQKITKSVKAPTVKP	Peptide444		-0.179717	-0.861651	-0.155672	-0.254459	0.542329	0.030654																																					-0.81265	-0.159943
A0A0A0MTS7	TTN	S35699	GIVKCQYDLTLSKELSDAPAFISQPRSQNIN	Peptide445																																												-0.765121	-0.485843
A0A0A0MTS7	TTN	S35706	DLTLSKELSDAPAFISQPRSQNINEGQNVLF	Peptide446																-0.0914049	-0.260255	-0.154599	-0.0928654	-0.0946724	0.00427323		-0.329918	-0.699624	-0.424738	-0.47674	-0.583855	-0.31732									-0.168138	-0.216507	0.122087	-0.0938089	0.0892628	-0.0745697
A0A0A0MTS7	TTN	S15609	YPKAEAEWFKENEPLSTKTIDTTAEQTSFRI	Peptide447		0.359694	-0.725827	0.510952	0.492643	0.158292	0.17642																0.396531	-0.11175	0.698838	0.21732	0.197091	0.0924604		0.314902	-0.114086	0.876725	0.0262474	0.322042	0.0999427									0.0336452	-0.0141181
A0A0A0MTS7	TTN	S726	QARVREPREPGHLEESYAQQTTLEYGYKERI	Peptide448									0.601681	-0.439624	0.172769	-0.375848	0.471549	-0.198727									-0.0653647	-0.816359	-0.150879	-0.0667571	-0.0396095	-0.308832
A0A0A0MTS7	TTN	S26003	YKEPGPPGTPFATAISKDSMVIQWHEPVNNG	Peptide449									0.465041	0.412336	0.398947	0.0512858	-0.0396948	0.258727		0.598664	0.0042254	-0.0240416	0.119986	0.188586	0.248725		0.200341	0.531774	0.110905	0.201303	-0.0949483	0.0941901		0.10032	0.199839	0.316509	0.304447	-0.313901	0.0325649
A0A0A0MTS7	TTN	S19907	DSCYLTWKEPLDDGGSVITNYVVERRDVASA	Peptide450		-0.0257333	-0.00140847	0.224584	0.126432	-0.00835774	0.144293		-0.0957132	-0.262692	-0.0539915	-0.237004	-0.133922	-0.225103		0.135521	-0.0325742	0.132642	0.113391	0.173982	0.211453		-0.0753054	-0.267458	-0.00826752	-0.0514422	-0.0545021	0.0135242		-0.148728	-0.275135	0.0870475	-0.100762	0.0667037	0.0409415		0.080144	-0.0644948	0.0474092	0.140848	0.0949925	0.150138		-0.107561	-0.161164
A0A0A0MTS7	TTN	S31907	SEPSEASNFISCREPSYTPGPPSAPRVVDTT	Peptide451		-0.315962	-0.601203	-0.176053	-0.185497	-0.134681	-0.0933788																																					-0.519177	-0.434331
A0A0A0MTS7	TTN	S444	VVAAVDMARVREPVISAVEQTAQRTTTTAVH	Peptide452		-0.612168	-0.699332	-0.518097	-0.683317	0.262604	-0.29451		-0.227424	0.0444971	-0.0858126	-0.188182	-0.0380327	-0.0304917									-0.541489	-0.350207	-0.528228	-0.419543	0.288272	0.376583		-0.204769	-0.300708	-0.33445	-0.356652	-0.10838	0.0556898									-0.295696	-0.397185
A0A0A0MTS7	TTN	S540	VVISAAKAKEQETRISEEITKKQKQVTQEAI	Peptide453																														-0.279606	-0.288075	-0.00691996	-0.307863	-0.58634	0.0535579
A0A0A0MTS7	TTN	S30097	ISKTCEIEVSQLKEQSVLEFRVFAKNEKGLS	Peptide454		0.204953	0.0180543	0.275258	0.27755	0.241958	0.334123		0.212048	0.0145073	0.314225	0.0596585	0.0856987	0.227204		0.361292	0.138834	0.263267	0.324661	0.255854	0.290355		0.287266	-0.0143605	0.227366	0.150164	0.198605	0.150478		0.185754	0.122783	0.361567	0.146625	0.167903	0.174507		0.338405	0.113135	0.280493	0.280417	0.0263062	0.20096		0.178986	0.132258
A0A0A0MTS7	TTN	S30181	LKDGLPLKESEFVRFSKTENKITLSIK KK	Peptide455		0.456065	-0.288386	0.578199	0.632943	0.429795	0.452793		0.458291	-0.00380817	0.665255	0.220174	0.222467	0.268719		0.271959	0.193505	0.47075	0.343404	0.349604	0.463558		0.391162	0.0803355	0.503504	0.275564	0.233104	0.292613		0.316663	0.168867	0.538997	0.380417	0.337736	0.315775		0.702913	0.115234	0.529965	0.446091	0.204377	0.253365		0.345711	0.164224
A0A0A0MTS7	TTN	S35092	SSVREVKSQMTETRESLSSYEHSASAEMKSA	Peptide456		-0.515699	-0.109114	0.118154	-0.587042	0.406869	0.0975753									0.148557	1.55081	-0.498587	-0.0392759	-0.0236602	-0.0449428		-0.858167	-0.604469	-0.672599	0.127748	-0.629963	0.379168		-0.385167	0.534254	-0.690606	-0.262197	-1.08825	0.0172227									-0.264539	0.168158
A0A0A0MTS7	TTN	S35094	VREVKSQMTETRESLSSYEHSASAEMKSAAL	Peptide457		-0.274958	-0.681901	0.11051	-0.116097	-0.0735066	-0.0143431		0.237222	-0.00590449	0.388357	0.362144	0.202316	0.204929																-0.0963266	-0.0521874	0.221041	-0.0343986	0.00692232	0.329557									-0.405426	0.258168
A0A0A0MTS7	TTN	S35095	REVKSQMTETRESLSSYEHSASAEMKSAALE	Peptide458		-0.310355	-0.87275	-0.108043	-0.367938	-0.218814	-0.363657		0.0118402	0.036153	0.303479	0.00941677	0.0876642	0.0700055																-0.209317	-0.190838	0.0271435	-0.225751	-0.228761	0.237048
A0A0A0MTS7	TTN	S35099	SQMTETRESLSSYEHSASAEMKSAALEEKSL	Peptide459		-0.559297	-0.278234	-0.212243	-0.433036	0.46629	0.268184									0.128095	0.030575	-0.0554834	-0.215586	0.14766	0.664787		-0.397861	-0.45328	-0.22785	-0.449909	-0.0929507	0.415782		-0.476057	-0.512377	-0.165916	-0.521874	-0.32559	0.897851
A0A0A0MTS7	TTN	S35101	MTETRESLSSYEHSASAEMKSAALEEKSLEE	Peptide460		-0.262781	-0.62307	-0.11191	-0.0220268	0.374014	0.493386		0.144372	-0.0893369	0.256977	0.0108486	0.305403	0.445425		-0.265069	-0.251111	-0.0615293	-0.473714	0.0208742	0.409591		-0.448064	-0.394693	0.0231428	-0.214878	0.544206	1.18827		-0.0594557	-0.370563	0.121534	-0.154684	0.0762195	0.970125		-0.0907504	-0.179711	-0.141763	-0.173549	0.119461	0.490703		0.119548	-0.321339
A0A0A0MTS7	TTN	S31263	TWKLEEMRLKETDRVSITTTKDRTTLTVKDS	Peptide461																																												-0.758409	-0.243371
A0A0A0MTS7	TTN	S30268	GGGEITCYSIEKRETSQTNWKMVCSSVARTT	Peptide462									-0.0449022	-0.154419	0.100601	0.161081	-0.0895786	0.0109021		-0.094484	-0.296462	-0.0857654	-0.23547	0.0796281	0.0613824																							-0.483297	-0.0195024
A0A0A0MTS7	TTN	S367	ASSSEAEMRETTLTTSTQIRTEERWEGRYGV	Peptide463		-0.143018	0.0621624	-0.0601309	-0.19268	0.336289	-0.0374459		0.334018	-0.170966	0.237042	-0.130445	0.225065	-0.0113394		-0.0858367	-0.206073	-0.268668	-0.104594	0.124723	-0.136959		-0.0441137	-0.035444	-0.0554907	0.0410477	0.2391	0.240355		-0.0693851	-0.024352	-0.144561	-0.224279	0.488817	0.162674		-0.0276935	0.0428211	-0.0263875	-0.0460606	0.315296	-0.098241		0.0436349	0.0892483
A0A0A0MTS7	TTN	S28012	RKDGQTLKETTRVNVSSSKTVTSLSIKEASK	Peptide464		0.15827	-0.0371128	0.662314	0.309246	0.460263	0.173059									0.281586	0.457739	0.343163	0.182974	0.419901	0.142726		0.337849	0.240679	0.325691	-0.0344447	0.149428	-0.295856		0.108093	0.167681	0.404541	-0.0259305	0.117308	0.0100394									0.269541	0.336612
A0A0A0MTS7	TTN	S28013	KDGQTLKETTRVNVSSSKTVTSLSIKEASKE	Peptide465																							0.0930687	-0.0955401	0.227917	-0.121077	-0.0855796	-0.195066		-0.0732875	-0.258076	0.425985	-0.297517	0.0404598	-0.190916									-0.153748	-0.0385335
A0A0A0MTS7	TTN	S28014	DGQTLKETTRVNVSSSKTVTSLSIKEASKED	Peptide466																0.55615	0.188307	0.610209	0.413725	0.392388	0.549632		-0.0156448	-0.431301	0.14767	-0.0563957	-0.330751	-0.416699																-0.161543	-0.354742
A0A0A0MTS7	TTN	S28099	GCQISNYIVEKKETTSTTWHIVSQAVARTSI	Peptide467		-0.333193	-0.916122	-0.176662	-0.263429	-0.2632	-0.275821
A0A0A0MTS7	TTN	S33453	KWISVTTEEIRETVFSVKNLIEGLEYEFRVK	Peptide468		0.328903	-0.792063	0.509697	0.255136	0.223064	0.211537		-0.228991	-0.729031	0.110324	-0.144755	-0.0438863	-0.107099		-0.0419892	0.0825574	0.34774	0.185862	0.425988	0.122266		-0.0740758	-0.315473	-6.65015e-05	-0.130065	-0.0485852	-0.189996									0.313447	0.0512165	0.512639	-0.0477156	-0.207399	-0.0217355		-0.127357	-0.255947
A0A0A0MTS7	TTN	S905	YKSEAGVEVKKEVGVSITGTTVREERFEVLH	Peptide469																							-0.365115	-0.180728	-0.345646	-0.317585	-0.182519	-0.117939		-0.556481	-0.299781	-0.301534	-0.556372	-0.0525422	-0.0321902
A0A0A0MTS7	TTN	S14209	KTHKLEMKEVTLDDISQIKAQVKELSSTAQL	Peptide470																														-0.527305	-0.613145	-0.461248	-0.795243	-0.111738	-0.247784		-0.441317	-0.689114	-0.268948	-0.369336	0.124904	-0.106111
A0A0A0MTS7	TTN	S31681	YTGKRATAVIKFCDRSDSGKYTLTVK SGT	Peptide471																0.341396	0.114507	0.256455	0.0387939	-0.000255941	0.326983									-0.246751	-0.109965	-0.0223822	-0.217658	-0.219601	0.0547275
A0A0A0MTS7	TTN	S26551	IVTPQTGLRVTRFEISKLTEHQEYKIRVCAL	Peptide472																														-0.72672	-0.746453	-0.11692	-0.790101	-0.0922698	-0.264233		-0.227605	-0.59164	-0.194771	-0.110184	0.0779047	-0.33425
A0A0A0MTS7	TTN	S17865	EIGPILAVDPLGPPTSPERLTYTERTKSTIT	Peptide473		0.14747	0.0530948	0.0323776	0.0357707	0.399335	0.256175		0.0650668	-0.181543	0.122853	0.236709	-0.0263987	0.487798		0.433635	0.145885	0.129922	0.291555	0.077496	0.198428		0.113108	0.153711	0.230942	0.0743843	0.0204917	0.132231		0.0522091	0.123864	0.153349	0.0559139	0.0759119	0.292087		0.143108	0.108554	0.117307	0.119983	0.0629279	0.147355		0.0573204	0.173763
A0A0A0MTS7	TTN	S32484	EYVFRVAATNRFGIGSYLQSEVIECRSSIRI	Peptide474									-0.0900051	-0.433538	0.119109	-0.170357	-0.270453	-0.0916392		-0.0514309	-0.178026	-0.0584755	-0.0915661	-0.0643751	0.0559417		-0.0603401	-0.321584	-0.0427505	-0.14327	-0.26116	-0.187641									0.0383131	-0.130393	-0.0464543	-0.304159	-0.217061	-0.0834059		-0.287622	-0.085728
A0A0A0MTS7	TTN	S32488	RVAATNRFGIGSYLQSEVIECRSSIRIPGPP	Peptide475																														-0.395375	-0.460654	-0.0739426	-0.468789	-0.116778	-0.185999									-0.625708	-0.588532
A0A0A0MTS7	TTN	S23149	VDRFGPPGPPEKPEVSNVTKNTATVSWKRPV	Peptide476									0.656111	0.386901	0.921765	0.389568	0.485519	0.599494		0.299583	-0.0828174	0.467152	0.148809	0.332065	0.322686		0.650976	0.00548568	0.936892	0.375779	0.497152	0.399073		0.501306	0.172042	0.68761	0.46673	0.363739	0.521761		0.367599	-0.0664056	0.589337	0.217034	0.345231	0.369612		0.308512	0.244334
A0A0A0MTS7	TTN	S19341	IGTEKFHKVTNDNLLSRKYTVKGLKEGDTYE	Peptide477		0.224228	0.0276438	0.304162	0.316263	0.185882	0.197715		0.236069	-0.0456839	0.466251	0.0324477	0.0962017	0.109441		0.290866	0.056885	0.32089	0.129594	0.231101	0.191733		0.232284	0.0257504	0.251804	0.158198	0.0920815	0.146261		0.346388	0.106689	0.195765	0.138411	0.162627	0.0969547		0.319931	0.208096	0.248673	0.185002	0.152748	0.127923		0.126994	0.173035
A0A0A0MTS7	TTN	S4725	EVALGHLAKFTCEIQSAPNVRFQWFKAGREI	Peptide478		0.189015	0.186106	0.152158	0.161117	0.156687	0.169521		0.174739	-0.0247943	0.395106	-0.00845424	-0.0872071	0.101992		0.302037	0.162671	0.176485	0.254005	0.173627	0.163624		0.204339	0.114131	0.126714	0.0624594	-0.0460972	0.175098		0.100609	0.129369	0.19026	0.0801461	0.155296	0.141366		0.325533	0.201244	0.200376	0.180533	-0.031158	0.0379539		0.134052	0.175755
A0A0A0MTS7	TTN	S30421	GLSSPSDPSKFTLAVSPVDPPGTPDYIDVTR	Peptide479									0.0264531	-0.0882073	-0.0331629	-0.118454	0.0465394	0.131857		-0.231906	-0.201135	-0.11482	-0.218622	0.147627	0.0135038		-0.0637123	0.0122703	-0.0381096	0.0154249	-0.128192	-0.00579662		-0.0829116	-0.102311	0.029494	-0.0261448	-0.105064	0.0986124		-0.100056	-0.266703	-0.0889066	-0.101129	0.15314	0.11817		-0.186295	-0.0973423
A0A0A0MTS7	TTN	S30907	YKFRVSAINGAGKGDSCEVTGTIKAVDRLTA	Peptide480		0.000873873	0.162884	0.226016	-0.241371	0.0971689	-0.058248									0.576745	0.250095	0.0793071	0.340821	0.0568377	0.346098		0.126395	0.157412	0.111173	0.00436462	-0.408784	0.00592658		-0.0450891	0.0778099	0.169768	-0.0522015	-0.17173	-0.0999049
A0A0A0MTS7	TTN	S21510	HPTCKWKKGEDEVVTSSHLAVHKADSSSILI	Peptide481		-0.159309	-1.15046	0.0869857	-0.180704	-0.0855354	0.0501776		0.450961	0.529812	0.613427	0.466256	0.280548	0.575345									0.201739	0.16707	0.263819	0.192558	0.0963543	0.190761		0.218108	0.0113799	0.330995	0.169688	0.136525	0.221525									0.0592009	0.0843716
A0A0A0MTS7	TTN	S21511	PTCKWKKGEDEVVTSSHLAVHKADSSSILII	Peptide482		0.302295	-0.136163	0.344546	0.354533	0.277781	0.168706		0.180546	-0.0628231	0.32616	0.126894	0.141477	0.177006		0.258962	0.105486	0.193465	0.224662	0.266164	0.286396		0.115763	-0.0713974	0.361224	0.0612609	0.21937	0.308733		0.20006	-0.00349851	0.243955	0.164739	0.250738	0.194293		0.239438	0.134656	0.290348	0.112306	0.27281	0.216548		0.177223	0.248963
A0A0A0MTS7	TTN	S14007	DIPGQWKLKGELLRPSPTCEIKAEGGKRFLT	Peptide483																0.839319	0.188677	0.649886	0.46998	0.2551	0.409897									0.0127815	0.0631316	0.167623	0.0450435	-0.235155	0.271393		0.279452	0.170076	0.509261	0.129773	0.383309	0.140446		-0.107295	0.376563
A0A0A0MTS7	TTN	S30078	TEYVVERKGKGEQTWSHAGISKTCEIEVSQL	Peptide484									0.12946	0.282979	0.33989	0.284996	0.242803	0.268282									0.0432871	-0.106763	0.230438	0.0104693	0.0497957	0.219814		-0.075248	-0.254154	0.212709	0.00972122	0.316992	-0.0130923		-0.0419474	-0.103736	-0.0892183	-0.0662595	-0.151235	-0.179429		-0.257675	-0.0300244
A0A0A0MTS7	TTN	S17323	VQEEEPFVLPLTQRLSIDNSKKGESQLRVRD	Peptide485		0.759844	-0.427746	0.76576	0.63204	0.416634	0.517426		0.596029	0.0848054	0.786449	0.443194	0.495371	0.502099		0.706454	0.157657	0.536619	0.347312	0.469319	0.423188		0.520547	0.125645	0.783562	0.357118	0.440648	0.323496		0.582407	0.23483	0.723082	0.472967	0.334639	0.426531		0.64715	0.26418	0.745272	0.433051	0.0724327	0.439486		0.370077	0.370101
A0A0A0MTS7	TTN	S17327	EPFVLPLTQRLSIDNSKKGESQLRVRDSLRP	Peptide486		0.417809	0.0756803	0.39462	0.0696615	0.293465	0.26024		0.394999	-0.127433	0.452641	-0.097144	0.0419797	-0.0441561		0.954592	0.253809	0.51552	0.389287	0.40928	0.435657		0.503071	-0.0494634	0.475457	0.124038	-0.0795061	0.0100791		0.163607	0.0530812	0.489399	0.234158	0.0557565	0.142685		0.357946	0.0483125	0.249501	0.0751484	-0.0947293	0.328301
A0A0A0MTS7	TTN	S33614	LEGMGAVHALRGEVVSIKIPFSGKPDPVITW	Peptide487		0.352209	-0.857443	0.450033	0.248983	0.203187	0.22589		-0.143419	-0.900361	0.191591	-0.0267383	-0.0661877	-0.194043		0.108437	-0.171227	0.213523	0.167352	0.277821	0.200456																0.24026	-0.05768	0.42998	-0.0294229	-0.099584	0.0677938		-0.273441	-0.15922
A0A0A0MTS7	TTN	S33559	RIQEFKGGYHQLIIASVTDDDATVYQVRATN	Peptide488		0.151386	-0.172758	-0.0910508	0.367321	0.0994683	0.176063		-0.0296433	-0.0896469	0.189069	0.0658237	0.178499	0.282044		-0.0571815	-0.0824963	0.0379193	0.126011	0.193774	0.172854		-0.11247	0.0488236	-0.055583	0.195492	0.242285	0.216578		0.0768324	0.0218395	-0.0154819	0.0874073	0.108267	0.301304		0.00015332	0.0273938	0.0529684	0.0451762	0.100882	0.395747		0.0731801	-0.0508771
A0A0A0MTS7	TTN	S24704	VSAQNEKGISDPRQLSVPVIAKDLVIPPAFK	Peptide489		-0.00848618	-0.0599065	0.244363	0.276898	0.199766	0.128902		0.234671	0.0281697	0.264241	-0.00731354	0.185065	0.075975		0.0443223	0.14744	0.0911335	0.172079	0.26269	0.147435		0.167345	-0.0359687	0.238235	0.123853	0.0741523	0.0699518		0.12573	0.072399	0.314381	0.0427626	0.185162	0.13861		0.206771	0.233224	0.172902	0.178907	-0.0838873	0.0739578		0.148636	0.0254532
A0A0A0MTS7	TTN	S22583	FRLKIPIKGKPAPSVSWKKGEDPLATDTRVS	Peptide490																0.103521	-0.0968439	0.520101	0.294838	0.24379	0.262294		-0.28177	-0.808394	-0.240703	-0.233955	-0.232831	-0.367203									0.196093	-0.260123	0.298308	0.147006	-0.0800953	-0.0183692		-0.535773	-0.366653
A0A0A0MTS7	TTN	S34322	YTFESDKGLYQLTINSVTTDDDAEYTVVARN	Peptide491																							-0.466597	-0.428843	-0.468112	-0.198912	-0.158898	-0.323333		-0.257348	-0.386791	-0.0320017	-0.333635	-0.358449	-0.546171		-0.206349	-0.319756	-0.259208	-0.0509126	-0.44682	-0.130418		-0.34652	-0.53463
A0A0A0MTS7	TTN	S788	SETHIKTTDQKGMHISSQIKKTTDLTTERLV	Peptide492																														-0.454396	-0.0057271	-0.317303	-0.646055	-0.315999	0.0399985
A0A0A0MTS7	TTN	S789	ETHIKTTDQKGMHISSQIKKTTDLTTERLVH	Peptide493									-0.197279	-0.135061	-0.298768	-0.442028	0.16716	-0.325494																							-0.473028	-0.283361	-0.855555	-0.429692	-0.0114622	-0.178706
A0A0A0MTS7	TTN	S31997	SFRVAAVNVKGMSEYSESIAEIEPVERIEIP	Peptide494									-0.176584	-0.205836	-0.00842263	-0.0535604	-0.270376	-0.058118																-0.394217	-0.457286	-0.182022	-0.277037	-0.230429	-0.181747
A0A0A0MTS7	TTN	S31999	RVAAVNVKGMSEYSESIAEIEPVERIEIPDL	Peptide495		-0.234895	0.100967	-0.0151036	0.075567	0.0562733	0.0470371		-0.0520797	-0.303386	-0.0797117	-0.0682095	-0.0960894	-0.0671965		-0.066115	0.0410723	0.136707	0.0245708	0.123538	0.120238		-0.261847	-0.163506	-0.0552992	-0.0263127	-0.027383	-0.00680722		-0.0614727	-0.0904026	-0.0157274	-0.0489903	-0.0205545	-0.0456101		0.0661814	0.0446727	-0.0260892	0.174888	-0.239718	0.0513299		-0.138148	-0.0709569
A0A0A0MTS7	TTN	S35788	TIKAKNFRGQCSATASLMVLPLVEEPSREVV	Peptide496																0.178401	-0.117078	0.0406501	0.303373	-0.0720279	0.421653									-0.187479	0.0520053	-0.0353136	-0.215375	-0.49501	0.0503054		-0.0313188	0.133741	-0.184364	0.0341706	-0.181758	-0.0271274		-0.41684	0.198637
A0A0A0MTS7	TTN	S14361	DVHGQWKLKGQPLTASPDCEIIEDGKKHILI	Peptide497		0.501998	-0.12931	0.87591	0.531003	0.390784	0.391356									0.921167	0.48869	0.850904	0.884888	0.499464	0.543791									0.182586	0.144637	0.579364	0.208499	-0.162042	0.391855									0.0724081	0.234969
A0A0A0MTS7	TTN	S35172	VPTVTWLRKGQVLSTSARHQVTTTKYKSTFE	Peptide498		0.0264861	0.299722	0.188861	0.0357369	0.255683	-0.0417407									0.207294	0.355616	0.168235	0.32345	0.301101	0.437182		-0.0687826	-0.119234	-0.12982	0.0226457	-0.217036	-0.0852187		0.0224156	-0.00987987	0.0577772	-0.148175	-0.183173	-0.0726782									0.0207614	-0.140265
A0A0A0MTS7	TTN	S23576	GSKITGYVIEAQRKGSDQWTHITTVKGLECV	Peptide499									0.55889	0.390449	0.535853	0.296943	0.191949	0.476656									0.191191	0.219636	0.294338	0.161974	-0.00904061	0.163281		0.0564887	0.152685	0.270038	0.252349	-0.345133	0.0196618
A0A0A0MTS7	TTN	S31599	VLAK AGVISKGSESTGPVTCRDEYAPPKA	Peptide500																0.236597	0.120416	-0.233448	-0.102076	-0.261054	0.0292867		-0.179871	-0.0808031	-0.325547	-0.399951	-0.676644	-0.423461		-0.484971	-0.0196158	-0.427819	-0.349668	-0.371997	-0.411699
A0A0A0MTS7	TTN	S20722	RRLKGSDDWERVHKGSIKETHYMVDRCVENQ	Peptide501																0.275265	0.252168	0.364079	0.192982	0.348718	0.423283		0.369586	0.0953983	0.352253	0.171826	0.162354	0.0147533		0.259883	0.251862	0.46688	0.0880048	-0.0105505	-0.0129503									0.125113	0.14904
A0A0A0MTS7	TTN	S28713	WKTSIQSLRGTEYTISGLTTGAEYVFRVKSV	Peptide502																														-0.402415	-0.30003	-0.197394	-0.344273	-0.316304	-0.269964									-0.642622	-0.29226
A0A0A0MTS7	TTN	S32854	PKAAWYTIDSRVRGTSLVVKGLKENVEYHFR	Peptide503		0.280621	-0.103831	0.235289	0.356621	0.186183	0.272305		0.20838	0.0679004	0.388285	0.243622	0.170687	0.208082		0.161017	0.0285533	0.294177	0.133352	0.210703	0.174891		0.286918	-0.142085	0.303407	0.226733	0.231313	0.241712		0.256124	0.0621429	0.346135	0.161709	0.206186	0.26609		0.325158	0.112535	0.302953	0.26026	-0.00739067	0.360537		0.245891	-0.0256137
A0A0A0MTS7	TTN	S33699	LDVADVPDPPRGVKVSDVSRDSVNLTWTEPA	Peptide504		0.400141	0.210894	0.319611	0.236924	0.340492	0.105724									0.588632	0.532681	0.516518	0.501687	0.460006	0.519745		0.172273	0.0341772	0.180693	-0.0274742	-0.139782	-0.0832245		0.136514	-0.0469751	0.482165	0.0136738	-0.0426958	-0.103374									0.443816	-0.0780578
A0A0A0MTS7	TTN	S26649	TDKVQIEKGVNYTQLSIDNCDRNDAGKYILK	Peptide505		-0.248423	-0.963545	0.151394	0.405088	0.0422142	0.502966		0.396411	-0.903518	0.425832	-0.196377	-0.39102	-0.242304		-0.469755	-0.490367	-0.189132	-0.393061	-0.423138	-0.416953		0.0188536	-0.413638	0.188398	-0.191936	-0.163086	-0.269356									0.144101	-0.314111	0.241755	0.0977694	0.376187	-0.10535		-0.060616	-0.502301
A0A0A0MTS7	TTN	S2667	WLRDGKHLPLTNNIRSESDGHKRRLIIAATK	Peptide506		-0.642133	-1.62718	0.0218112	-0.26556	-0.40844	-0.30134		-0.300859	-0.914411	0.334482	-0.19403	-0.459738	-0.302064
A0A0A0MTS7	TTN	S21111	IIGYVVEMRPKIADASPDEGWKRC AAQLV	Peptide507																							-0.615323	-1.15567	-0.376343	-0.624072	-0.577522	-0.438954									-0.349763	-0.77518	-0.164382	-0.325325	0.405235	-0.130499
A0A0A0MTS7	TTN	S24084	ELEGTAKLEIKIADFSTNLVNKDSTRRDSGA	Peptide508		0.550171	0.0825651	0.48187	0.73865	0.40123	0.540917									0.650786	0.297198	0.698449	0.601493	0.487009	0.579914		0.118425	-0.296522	0.213521	-0.0402249	-0.051224	0.00275426		0.0150803	-0.178983	0.399409	-0.160459	0.275079	-0.0545088		0.546972	0.220123	0.624361	0.48675	0.376764	0.452573		0.00432196	-0.0200728
A0A0A0MTS7	TTN	S30226	CRIAVPITVITLGPPSKPKGPIRFDEIKADS	Peptide509									0.157875	0.0505502	0.277192	0.0637313	0.255154	0.195605		0.250099	0.0497107	0.470743	0.179693	0.491259	0.178991		0.231703	-0.220331	0.534911	0.220152	0.14242	0.300284		0.0692997	-0.00886184	0.485414	0.175843	0.282481	0.274994		0.285159	-0.204406	0.563873	0.220456	0.269278	0.360805		0.0697919	0.139581
A0A0A0MTS7	TTN	S21866	PVTILAENVPPRIDLSVAMKSLLTVKAGTNV	Peptide510									0.4643	0.137124	0.616363	0.181413	0.355274	0.415945									0.289182	-0.140936	0.429782	0.02618	0.139381	0.27348		0.0783518	-0.212145	0.37358	-0.0723423	0.41654	0.0836925		0.0336854	-0.26174	0.137296	0.112627	0.22492	0.0323554		0.0161535	-0.191877
A0A0A0MTS7	TTN	S25670	CHKNSWKIDQLQEGCSYYFRVTAENEYGIGL	Peptide511																														-0.504721	-0.599779	0.00626734	-0.519876	-0.233431	-0.287387		-0.198728	-0.399562	-0.18993	-0.0234704	0.0538912	-0.00805468
A0A0A0MTS7	TTN	S1622	EGTKGEAALKIDSTVSQDSAWYTATAINKAG	Peptide512																																												-0.788451	-0.528592
A0A0A0MTS7	TTN	S35904	KAGIRGIPPKIEALPSDISIDEGKVLTVACA	Peptide513																0.535619	-0.121277	0.704654	0.38447	0.288553	0.381093		0.229405	-0.202182	0.390473	0.0081733	0.0595221	-0.0018209		0.0775024	-0.0787724	0.363817	-0.0452503	-0.0328235	0.206313		0.125732	-0.0997823	0.355217	0.21731	0.197274	0.233103		-0.164742	0.0199614
A0A0A0MTS7	TTN	S35907	IRGIPPKIEALPSDISIDEGKVLTVACAFTG	Peptide514		0.635063	-0.197368	0.646354	0.639414	0.385217	0.504908		0.555258	0.162764	0.76117	0.336698	0.400591	0.486987		0.574099	0.141821	0.614208	0.39441	0.485526	0.335368		0.51989	0.134067	0.778206	0.351873	0.437239	0.323232		0.497669	0.200866	0.736279	0.374771	0.387632	0.448874		0.591249	0.198042	0.580104	0.378045	0.34806	0.429156		0.347083	0.305833
A0A0A0MTS7	TTN	S2072	GKITIPTFKPDKIELSPSMEAPKIFERIQSQ	Peptide515		0.476992	-0.166448	0.605104	0.43851	0.266116	0.469943		0.551975	0.0116483	0.90873	0.524123	0.546768	0.589552		0.446916	0.00535167	0.559181	0.32678	0.423228	0.401757		0.429098	0.0262664	0.801719	0.39378	0.47457	0.532272		0.432195	0.212989	0.591083	0.492334	0.389065	0.505982		0.382908	0.087803	0.509246	0.221698	0.295174	0.422934		0.212019	0.288146
A0A0A0MTS7	TTN	S2074	ITIPTFKPDKIELSPSMEAPKIFERIQSQTV	Peptide516		0.727477	-0.273038	0.74779	0.69256	0.432754	0.568057		0.36146	0.122937	0.642974	0.346645	0.408575	0.529531		0.515893	0.135161	0.687833	0.402778	0.480667	0.492297		0.396904	0.119496	0.719964	0.270736	0.528163	0.401253		0.424396	0.140356	0.681401	0.350868	0.338571	0.606483		0.514795	0.24658	0.682327	0.370371	0.499066	0.540846		0.222155	0.401023
A0A0A0MTS7	TTN	S25822	YSVQVGQDLKIEVPISGRPKPTITWTKDGLP	Peptide517									0.134725	-0.246356	0.352914	0.229077	0.0235061	0.0677866																-0.139513	-0.252133	-0.112948	-0.027815	-0.0815112	0.0629289		-0.178181	-0.496229	-0.297731	-0.342026	-0.363482	-0.0526246
A0A0A0MTS7	TTN	S22241	TQYQFRVYAVNKIGYSDPSDVPDKHYPKDIL	Peptide518									0.503505	0.151377	0.588296	-0.173852	0.112615	0.144999		0.178816	0.0453452	-0.127037	-0.179315	0.146089	0.12879									0.097675	0.0784487	0.164777	0.227394	-0.459709	0.113428
A0A0A0MTS7	TTN	S22244	QFRVYAVNKIGYSDPSDVPDKHYPKDILIPP	Peptide519		-0.180361	-1.3324	-0.0563389	0.0849947	0.043489	0.0625492																														-0.159858	-0.612509	0.00326313	-0.170202	0.172848	-0.139605
A0A0A0MTS7	TTN	S19568	RIHAENLYGISDPLVSDSMKAKDRFRVPDAP	Peptide520									-0.0614691	-0.191246	0.0903823	0.136433	0.188205	0.0698692																-0.224253	-0.322388	0.104244	-0.0170633	-0.245772	0.103105		-0.170959	-0.521921	-0.182968	-0.134908	-0.177166	-0.0971476
A0A0A0MTS7	TTN	S19570	HAENLYGISDPLVSDSMKAKDRFRVPDAPDQ	Peptide521																							-0.704135	-0.850044	-0.68529	-0.562239	-0.706533	-0.408814									-0.388317	-0.854816	-0.350351	-0.237184	-0.0852154	-0.156618		-0.764389	-0.585484
A0A0A0MTS7	TTN	S24306	HEYEFRIMAE AGISAPSPTSPFYKACDTV	Peptide522									-0.435941	-0.710315	-0.261661	-0.0703781	-0.176258	-0.357135																							-0.353316	-0.801479	-0.523897	-0.309696	-0.475663	-0.126615
A0A0A0MTS7	TTN	S33907	FEFISGLDIFERINTSAFELNEREIVSYVHQ	Peptide523		0.130515	-0.225824	0.205819	0.324578	0.0559441	0.269177		0.0131045	0.0235738	0.308769	0.235475	0.137367	0.175181		0.0741722	0.00654333	0.174781	0.0965821	0.169561	0.0535171		0.102485	0.015606	0.163587	0.112347	0.13394	0.0828727		0.148214	0.0624533	0.253731	0.0767064	0.0744143	0.223787		0.272023	0.097471	0.270656	0.21814	-0.183225	0.162223		-0.160304	0.182601
A0A0A0MTS7	TTN	S25849	DGLPLKQTTRINVTDSLDLTTLSIKETHKDD	Peptide524																														-0.377957	-0.400546	0.0382365	-0.199077	-0.230303	-0.140401
A0A0A0MTS7	TTN	S32512	IRIPGPPETLQIFDVSRDGMTLTWYPPEDDG	Peptide525																-0.0699984	-0.20451	0.151418	0.058604	-0.0782357	0.105691		-0.296223	-0.446752	-0.1207	-0.125468	0.0269847	0.042196		-0.2103	-0.273499	-0.109483	-0.165677	0.00556303	0.0175777		-0.0273925	-0.242732	-0.0708104	-0.0483258	-0.0951536	-0.18353		0.868694	-0.643407
A0A0A0MTS7	TTN	S34625	RITDQYRPKWRIPKLSQDDLEIVRPARRRTP	Peptide526		0.303735	-0.0978926	0.365263	0.286867	0.276346	0.394287		0.323315	-0.124793	0.375634	0.237469	0.184718	0.21898		0.34581	0.0312003	0.31557	0.165036	0.255409	0.196394		0.208571	0.0119561	0.374046	0.229929	0.174651	0.257855		0.239017	0.116031	0.324299	0.221933	0.117588	0.238834		0.33854	0.110778	0.333731	0.20101	0.344664	0.185902		0.19196	0.144702
A0A0A0MTS7	TTN	S2086	LSPSMEAPKIFERIQSQTVGQGSDAHFRVRV	Peptide527		0.361698	0.194121	0.382455	0.301268	0.401835	0.187795		0.182736	-0.0129325	0.132103	0.138014	0.102928	0.198961		0.462834	0.248646	0.466261	0.425473	0.436204	0.346435		0.188064	0.0731791	0.298586	0.166314	0.213019	0.272803		0.0904694	0.00624185	0.3148	0.0845162	0.237712	0.515763		0.244242	0.254174	0.373132	0.194388	0.161176	0.471197		0.228231	0.120149
A0A0A0MTS7	TTN	S2093	PKIFERIQSQTVGQGSDAHFRVRVVGKPDPE	Peptide528		-0.0146802	0.139294	0.0926296	0.112024	0.160215	0.0281232		0.0556804	-0.148883	0.160271	-0.0170582	-0.168734	-0.0520845		-0.00842655	0.132255	0.0563532	0.158697	0.191571	0.175442		0.0467647	0.0214496	-0.0512444	0.0304796	0.0274146	0.0268919		0.0759382	-0.00915136	0.108489	-0.0401527	0.105507	-0.0315533		0.230179	-0.05236	0.135271	0.17569	0.0621947	-0.046381		0.128427	-0.0781254
A0A0A0MTS7	TTN	S1406	TYIPTLEPVSRIRSLSPRSVSRSPIRMSPAR	Peptide529									0.294254	-0.398591	-0.45509	0.207666	0.144818	-0.260154		0.320341	-0.283806	-0.31385	0.323817	-0.00858226	-0.106607		0.226143	-0.330986	-0.238753	0.288057	0.081502	-0.448474		0.245567	-0.405761	0.0975596	0.271723	-0.143282	-0.62492		0.0656529	-0.694778	-0.534746	0.140694	0.144367	-0.0464568
A0A0A0MTS7	TTN	S32167	FKTVTTKCSKTLYRISGLVEGTMYYFRVLPE	Peptide530																							0.0879245	-0.269438	0.133513	0.00821363	-0.293101	-0.280108		-0.252319	-0.334542	0.0525806	-0.187841	-0.0926572	-0.178655									-0.165699	-0.17082
A0A0A0MTS7	TTN	S28944	IPAETKEGVKITEKPSPPEKLGVTSISKDSV	Peptide531		-0.024151	-1.24603	0.017707	0.137835	-0.18243	-0.162365																																					-0.803821	-0.344216
A0A0A0MTS7	TTN	S27907	GSKITGYVVEMQTKGSEKWSTCTQVKTLEAT	Peptide532									0.465963	-0.0600885	0.630133	0.115723	0.195832	0.26252		-0.210344	-0.123348	-0.133165	-0.344664	-0.0658329	-0.0624937									0.165259	-0.00962492	0.184816	-0.0210857	-0.228157	0.244273
A0A0A0MTS7	TTN	S23958	LKWAKPEYTGGFKITSYIVEKRDLPNGRWLK	Peptide533																0.308582	-0.0728838	0.314868	0.295774	0.354794	0.366004																0.130556	-0.402917	0.133605	-0.068683	-0.229354	0.243544
A0A0A0MTS7	TTN	S20877	LDKPGPVRNLKIVDVSSDRCTVCWDPPEDDG	Peptide534		-0.0157933	0.612719	-0.0303444	-0.0649355	0.128814	-0.0997636									0.53805	0.426615	0.169752	0.379687	0.28197	0.330143		-0.106645	-0.0274159	-0.266386	-0.300316	-0.293854	-0.243605		-0.112907	-0.106322	-0.0577415	-0.190887	-0.141824	-0.398996		0.17221	0.16052	-0.0790141	0.0624595	-0.157734	0.0275286
A0A0A0MTS7	TTN	S20878	DKPGPVRNLKIVDVSSDRCTVCWDPPEDDGG	Peptide535		-0.0565955	0.252378	0.0613502	0.0648761	0.11308	0.000729189		0.0881205	-0.0653656	0.0793036	-0.111367	-0.0913695	-0.0424695		0.154056	0.167548	0.0340609	0.0659467	0.151897	0.12365		-0.00772474	0.0404158	-0.0150388	0.0372399	-0.0424262	0.0359154		0.0065254	0.0659222	0.0505889	-0.0301465	0.0620457	0.00335219		0.132037	0.112297	0.0297029	0.103665	0.0225407	-0.00120585		0.0237499	0.137783
A0A0A0MTS7	TTN	S24404	LTENQEYKIRIYAMNSEGLGEPALVPGTPKA	Peptide536																-0.662743	-0.355421	-0.142445	-0.348698	0.0773832	-0.0552473																							-0.486559	-0.623282
A0A0A0MRA3	TTN	S5933	DIPVEWYLKGKKLEPSDKVVPRSEGKVHTLT	Peptide537		0.350605	-1.45622	0.397052	0.377398	-0.156424	0.143028																-0.0209933	-0.798112	0.295186	-0.202279	-0.194192	-0.209464																-0.0830179	-0.798118
A0A0A0MTS7	TTN	S22481	SSCSIGWKKPHSDGGSRIIGYVVDFLTEENK	Peptide538																							-0.116831	-0.251274	-0.234051	-0.239284	-0.388512	-0.354558		-0.536778	-0.393563	-0.0576359	-0.403019	-0.378339	-0.423602
A0A0A0MTS7	TTN	S31549	GGSKVVGYIIERKPVSEVGDGRWLKCNYTIV	Peptide539		0.00620926	0.119285	0.343455	0.0938079	0.202514	-0.000672408									0.391417	0.424036	0.342216	0.442263	0.43256	0.497779		0.0499818	0.0119198	0.107751	0.0435615	-0.141583	-0.123901		0.0225201	0.0799529	0.28972	-0.0347462	-0.18672	-0.0223038									0.160812	0.0228514
A0A0A0MTS7	TTN	S23425	TGKFVMTIENPAGKKSGFVNVRVLDTPGPVL	Peptide540		0.0836438	-0.203296	0.0943412	0.220589	0.199163	0.0488475		0.123067	0.00242372	0.373464	0.166874	0.143047	0.195213		-0.0387925	0.0248055	-0.0358394	0.0510264	0.147867	0.0673403		0.139386	-0.013779	0.0138786	0.306981	0.0329983	0.204185		0.172812	0.111415	0.188193	0.106098	0.147184	0.0655553		0.239529	0.0982046	0.106728	0.166032	-0.0653761	-0.0366018		0.10691	0.0709224
A0A0A0MTS7	TTN	S13650	AKPKGPIKGVPKKTPSPIEAERRKLRPGSGG	Peptide541		0.864782	0.0138386	0.29318	0.337639	0.367038	0.247749		0.490165	-0.0891664	0.284807	0.360909	0.198626	0.211415		0.921865	0.172585	0.467533	0.782147	0.674214	0.134497		0.442037	0.191428	0.300309	0.230373	0.45076	-0.0688872		0.617261	0.12381	0.259902	0.684018	-0.163018	0.22098		0.616704	0.387883	0.385151	0.255307	-0.0504678	0.184477		0.270754	0.336646
A0A0A0MTS7	TTN	S21324	DRKTWSTVTPEVKKTSFHVTNLVPGNEYYFR	Peptide542									-0.446331	-0.793623	-0.218443	-0.152484	-0.149234	-0.423894																							-0.281473	-0.597335	-0.365198	-0.28512	-0.357015	-0.302388
A0A0A0MTS7	TTN	S14991	KDGAEIKKGKKYDIISKGAVRILVINKCLLD	Peptide543		0.423513	-0.227311	0.823683	0.618161	0.381297	0.417792		0.51709	0.0584717	0.725687	0.106933	0.270909	0.196083		0.512637	0.213629	0.569285	0.537819	0.579419	0.529086		0.443995	-0.0574026	0.697386	0.395321	0.308928	0.268811		0.369999	0.151201	0.664239	0.324906	0.415246	0.263421		0.488258	0.173403	0.490011	0.268361	0.263421	0.470761		0.3148	0.29009
A0A0A0MTS7	TTN	S34932	ALKTQKTSERKYEVLSQQPFTLDHAPRITLR	Peptide544									0.357973	0.298601	0.791434	0.291021	0.194925	0.554728																0.152202	0.184895	-0.114348	0.119992	-0.0125003	0.0648502
A0A0A0MTS7	TTN	S34311	QKIKPGDNDKKYTFESDKGLYQLTINSVTTD	Peptide545									0.133854	-0.75371	0.512594	0.0459571	0.226927	0.0249044																							-0.224035	-0.773478	0.0983586	-0.182076	-0.119582	-0.160807		-0.590953	-0.349551
A0A0A0MTS7	TTN	S17921	KPDFERVNKRLCPTTSFLVENLDEHQMYEFR	Peptide546									0.414176	0.215178	-0.00921455	0.341836	0.113571	0.483291		0.681376	-0.122492	-0.137954	0.343766	0.0621902	0.234878		0.100375	0.448451	0.436159	0.00260316	0.0526274	0.0978935		0.0444837	0.260828	0.24399	0.145413	-0.202442	0.307709		-0.108454	-0.107602	-0.3632	-0.236711	-0.107637	-0.0223269
A0A0A0MTS7	TTN	S31126	TEQPAPPRRLDVVDTSKSSAVLAWLKPDHDG	Peptide547		0.373026	-0.422951	0.514462	0.429523	0.278353	0.330044		0.420317	-0.0250949	0.541052	0.156364	0.301277	0.283614		0.154087	0.00757022	0.288824	0.102262	0.245772	0.15717		0.315948	-0.0439811	0.497243	0.203357	0.183468	0.315458		0.234238	0.0503386	0.522778	0.247123	0.249742	0.250905		0.399823	0.127412	0.489863	0.313384	0.0578604	0.315405		0.23046	0.0453675
A0A0A0MTS7	TTN	S24054	VILKAGEAFRLEADVSGRPPPTMEWSKDGKE	Peptide548																0.312164	0.142186	0.106792	0.328472	0.12484	0.471074		0.0222556	0.00578124	-0.0937114	-0.021839	-0.294239	-0.167595		-0.0865843	0.0221545	-0.090228	0.0914826	-0.400149	-0.137924
A0A0A0MTS7	TTN	S26596	VKPEDKLEAPELDLDSELRKGIVVRAGGSAR	Peptide549		-0.0134079	0.0753746	0.268409	0.201448	0.325285	0.344256		0.159033	-0.180136	0.360208	0.0659613	0.148964	0.244516		0.349829	0.0337523	0.423247	0.260243	0.386048	0.243297		0.212152	-0.105948	0.449262	0.152649	0.100825	0.0610504		0.15839	-0.0320969	0.403626	0.131617	0.189658	0.153113		0.22216	0.0392791	0.325054	0.200173	0.0261728	0.206352		0.128806	0.0782664
A0A0A0MTS7	TTN	S34692	EEERLRLEEELELGFSASPPSRSPPHFELSS	Peptide550									-0.290651	-0.907768	-0.206687	-0.473552	-0.190503	-0.449178		-0.453254	-1.00977	-0.529934	-0.673624	-0.00164502	-0.605753		-0.36904	-0.916514	-0.253851	-0.337302	-0.367915	-0.582568									-0.382656	-0.47413	-0.420145	-0.379707	-0.447109	-0.248127
A0A0A0MTS7	TTN	S34694	ERLRLEEELELGFSASPPSRSPPHFELSSLR	Peptide551		0.296214	-0.256666	0.26051	0.315155	0.0978558	0.244794		0.0859529	-0.208642	0.136318	0.126934	0.141046	0.170073		0.231885	-0.129684	0.263697	0.151786	0.264131	-0.0123459		0.0549985	-0.177081	0.241746	0.108554	0.239879	0.0539905		0.0940301	-0.066602	0.269707	0.124013	0.103892	0.0761129		0.170802	0.0149507	0.2158	0.228952	0.212323	0.190743		-0.0102607	0.0126008
A0A0A0MTS7	TTN	S34699	EEELELGFSASPPSRSPPHFELSSLRYSSPQ	Peptide552		0.102519	-0.325219	-0.153667	-0.00223493	-0.130594	0.0336237		0.141821	0.0641885	0.278755	0.298945	0.151646	0.193817		-0.186925	-0.504713	-0.218332	-0.157976	-0.276597	-0.339688		-0.0172065	0.0286895	0.114351	0.0638635	0.163444	0.134873		0.0755022	-0.126508	0.158998	-0.072592	0.216329	0.0365452		0.0153175	-0.15218	-0.0571327	0.00331958	0.0833698	-0.0693165		-0.267885	-0.0253567
A0A0A0MTS7	TTN	S34706	FSASPPSRSPPHFELSSLRYSSPQAHVKVEE	Peptide553		0.0654162	0.0544414	0.205233	0.367964	0.224587	0.338264									0.100758	-0.107732	0.19798	0.154662	0.186661	0.170902		-0.0688509	-0.229162	0.0970027	0.0148904	-0.0590974	-0.0308288		-0.123116	-0.279792	0.257373	-0.167654	0.27172	-0.120947		0.108513	0.196201	0.468163	0.210993	0.444199	0.0844549		-0.229799	-0.12545
A0A0A0MTS7	TTN	S34707	SASPPSRSPPHFELSSLRYSSPQAHVKVEET	Peptide554									-0.0624937	-0.122508	-0.161201	0.162409	-0.134295	0.0743095		-0.218778	-0.301708	-0.1147	-0.00351987	0.0628853	0.0145043									-0.0034183	-0.314299	0.0343893	0.00986418	-0.132737	0.0879794		-0.0347291	-0.0374647	0.0469416	-0.0648056	0.10354	-0.0997551		-0.302377	-0.0621176
A0A0A0MTS7	TTN	S1449	PARMSPGRRLEETDESQLERLYKPVFVLKPV	Peptide555		-0.164491	0.009384	0.0829893	-0.275371	0.277191	-0.217669		0.41041	-0.0654822	0.347806	-0.152517	-0.0225162	-0.00686246		0.237421	0.159038	-0.0417319	0.0121522	0.0230065	0.0717045		0.112531	0.16408	0.0872328	0.131511	0.0999248	-0.119379		0.140161	-0.0388933	0.115089	0.0865113	0.160029	-0.188436
A0A0A0MTS7	TTN	S26669	DRNDAGKYILKLENSSGSKSAFVTVKVLDTP	Peptide556																-0.298327	0.000329089	0.319687	-0.287007	0.214625	-0.106431																							-0.469108	-0.375923
A0A0A0MTS7	TTN	S26671	NDAGKYILKLENSSGSKSAFVTVKVLDTPGP	Peptide557		0.43877	-0.383768	0.583005	0.491319	0.228052	0.243966									1.20782	-0.271783	0.938443	0.263079	-0.0326221	0.279682		0.193645	-0.127757	0.632533	0.0277099	-0.0502253	0.0553629		0.307422	-0.0960881	0.538174	0.0484029	0.0931365	0.000708191									0.134521	0.0773088
A0A0A0MTS7	TTN	S16460	KYQFDPPGPPTRLEPSDITKDAVTLTWCEPD	Peptide558		0.419448	-0.461289	0.664031	0.820883	0.436012	0.51719									0.0524403	0.00881313	0.568916	0.234447	0.250446	0.452339									-0.163036	-0.51945	0.237031	-0.398994	0.122199	0.0854645		0.534631	0.144538	0.723417	0.481636	0.488665	0.439675		-0.204757	-0.198519
A0A0A0MTS7	TTN	S17039	IYTITLENKLGSATASINVKVIGLPGPCKDI	Peptide559		0.136444	-0.321245	0.285744	0.237811	0.302502	0.284698		0.305032	-0.00242936	0.489293	0.159571	0.266501	0.235871		0.0522168	-0.0284842	0.199081	0.155631	0.29674	0.276954		0.273691	-0.130065	0.330943	0.254067	0.266919	0.154123		0.281701	0.0393978	0.327214	0.157602	0.279192	0.187211		0.283486	0.0278015	0.327307	0.134629	-0.0545598	0.109173		0.133878	0.0321865
A0A0A0MTS7	TTN	S28953	KITEKPSPPEKLGVTSISKDSVSLTWLKPEH	Peptide560																-0.193293	0.0199661	0.0472437	-0.0118287	0.0728457	0.163154																							-0.655005	-0.38488
A0A0A0MTS7	TTN	S28955	TEKPSPPEKLGVTSISKDSVSLTWLKPEHDG	Peptide561		0.371545	-0.683602	0.674344	0.720181	0.405053	0.454234		0.134829	-0.299644	0.525827	-0.0205227	0.191696	0.0543957		0.000639818	0.0975124	0.316252	0.0157578	0.362486	0.251495									0.257968	-0.00537014	0.368831	0.0916359	0.101521	0.300824		0.430954	0.0371751	0.674096	0.415196	0.385894	0.346247		0.1654	-0.0102668
A0A0A0MTS7	TTN	S13751	ADGKDRKLHIIDVQLSDAGEYTCVLRLGNKE	Peptide562																0.19157	-0.3825	0.242105	0.0565685	-0.229004	0.0290422		-0.198688	-0.327269	-0.244285	-0.020904	-0.119077	0.0256873		-0.210622	-0.223957	0.0976873	-0.193384	-0.25351	-0.0850674		0.0988982	0.0687527	0.178189	0.0827361	0.27076	0.000456412		-0.158391	-0.385722
A0A0A0MTS7	TTN	S29998	VSHKCSSTSFKLIDLSEKTPFFFRVLAENEI	Peptide563		0.41983	-0.20715	0.663164	0.494329	0.317975	0.440192		0.477707	0.114534	0.659872	0.19402	0.345574	0.369937		0.39535	0.204843	0.511317	0.348563	0.433349	0.375474		0.444804	0.0619041	0.600404	0.333686	0.325167	0.242659		0.411158	0.203538	0.65064	0.311961	0.300614	0.302179		0.501298	0.195012	0.53872	0.306583	0.164966	0.296286		0.350258	0.282133
A0A0A0MTS7	TTN	S20712	GSPNLSYHVERRLKGSDDWERVHKGSIKETH	Peptide564									0.474002	0.354654	0.565853	0.323316	0.398007	0.384959		0.2268	-0.18457	0.333635	0.147534	0.214358	0.151945		0.438713	0.0786862	0.59086	0.275858	0.322701	0.243431		0.38246	0.160885	0.573619	0.255914	0.253583	0.258452		0.291252	0.00790329	0.339435	0.192832	-0.00825244	0.223534		0.35338	0.249105
A0A0A0MTS7	TTN	S3118	IKIQKEKYVHRLLIPSTRMSDAGKYTVVAGG	Peptide565		-0.202954	-0.165352	-0.101147	-0.139871	-0.228362	-0.186029		0.0240725	0.145298	0.213376	0.183127	-0.0257821	0.0666352									0.0192434	-0.0522892	-0.0798915	0.0246053	-0.126835	0.102291		0.0479744	-0.0745103	0.0944882	-0.135794	0.0101112	0.00193206		0.0791014	-0.186954	-0.166772	-0.0649566	-0.148171	-0.198826		-0.146212	0.034742
A0A0A0MTS7	TTN	S33240	VPAMTWFHGQKLLQNSENITIENTEHYTHLV	Peptide566		-0.118501	-1.06593	0.100892	-0.0263133	-0.0225788	0.0383992		-0.189755	-0.477674	-0.0490495	-0.141237	-0.232285	-0.0951505									-0.216957	-0.653578	-0.0884068	-0.168942	-0.0342352	-0.017988									-0.0402643	-0.43304	0.122052	-0.133067	0.0332184	-0.0506462		-0.454167	-0.433975
A0A0A0MTS7	TTN	S2857	LVSERKVHKLMLQNISPSDAGEYTAVVGQLE	Peptide567																0.461588	-0.151266	0.348462	0.334713	-0.024276	0.231178		-0.0618378	-0.262959	0.125484	-0.123112	-0.163188	0.0352843		-0.299365	-0.190661	0.321409	-0.216095	-0.0314247	0.0240805		0.192204	-0.0759937	0.252833	0.161399	0.260592	0.204028		-0.0249742	-0.434318
A0A0A0MTS7	TTN	S26890	DLTIQPSLKLPFNTYSIQAGEDLKIEIPVIG	Peptide568									0.000123393	-0.85432	0.369151	-0.0633657	0.379476	0.0383267																-0.324507	-0.36386	-0.272552	-0.402658	-0.25425	-0.302184
A0A0A0MTS7	TTN	S13663	TPSPIEAERRKLRPGSGGEKPPDEAPFTYQL	Peptide569		1.58029	-0.492874	0.576897	0.78663	0.619922	-0.0713785		0.350521	-0.741991	-0.000371562	0.634545	0.514105	0.261072		1.49918	0.0521965	0.719555	1.34936	1.38789	0.0345033		0.594306	-0.0944106	0.390876	0.439817	0.605594	-0.444735		0.800049	-0.190239	0.0644782	1.0785	-0.315111	0.391073		1.02054	0.0822103	0.613078	0.52291	0.0648461	0.0920005		0.459497	0.159684
A0A0A0MTS7	TTN	S27539	LTDLRLRVTGLTEGHSYEFRVAAE AGVGE	Peptide570		0.143245	0.312618	0.0814071	0.0967922	-0.0253121	-0.121892		-0.0932102	-0.116763	-0.039189	-0.155171	-0.0947636	-0.0755064		0.0473347	-0.202868	-0.028321	0.0793673	-0.01278	0.0709178		-0.0415209	-0.04765	-0.0398561	0.0769602	-0.0101914	0.0225853		-0.107499	-0.202593	-0.0234558	-0.120296	0.280863	-0.0667753		-0.0680507	0.0799756	-0.124031	-0.158141	0.981709	-0.112079		-0.0593237	0.0766378
A0A0A0MTS7	TTN	S20776	VVKEDLQKPVLDLKLSGVLTVKAGDTIRLEA	Peptide571																0.371218	0.0359997	0.773564	0.704866	0.540008	0.427004									-0.27138	-0.364296	0.138612	-0.383148	-0.184649	-0.112128		0.381069	0.0193223	0.63447	0.390648	0.171628	0.193632		-0.580547	-0.114688
A0A0A0MTS7	TTN	S16973	DLETHDIIVIEGEKLSIPVPFRAVPVPTVSW	Peptide572									0.138491	-0.0596018	0.0851205	-0.192353	-0.0398654	-0.025852		0.0587105	-0.0101487	-0.207233	0.00577526	0.14723	0.0972998		0.0816158	-0.0354884	0.0679819	-0.0309133	-0.170248	-0.184404		-0.218791	-0.06828	0.175022	0.136997	-0.1687	-0.0526481		-0.0247508	-0.204495	-0.115396	-0.20148	-0.378826	0.0415694
A0A0A0MTS7	TTN	S27352	KDCIRTDGGQYILKLSNVGGTKSIPITVKVL	Peptide573		-0.185052	-0.781679	-0.0360358	0.00840867	-0.00840933	0.0474876		0.484296	-0.117317	0.704615	-0.131176	0.224364	0.18098									0.298843	-0.214123	0.399955	-0.0494088	-0.0163817	-0.0144226		-0.110677	-0.205722	0.313743	-0.109684	0.305043	-0.0571946		-0.0969999	-0.432519	-0.094569	0.0635502	0.209842	0.0114726
A0A0A0MTS7	TTN	S33097	SRPRRTAMSIKTKLTSGEAPGIRKEMKDVTT	Peptide574		0.165051	0.0703478	0.204818	0.060562	0.154746	0.188783		0.255194	0.0166344	0.396674	0.0902827	0.0891793	0.0994074		0.236927	0.0553243	0.148671	0.0676433	0.126654	0.0859024		0.188625	-0.00691862	0.263455	0.107129	0.0967091	0.247672		0.166191	0.0750783	0.221436	0.101734	0.2493	0.0696402		0.23482	0.11892	0.139681	0.157373	0.180521	0.0250721		0.0789921	0.0663782
A0A0A0MTS7	TTN	S28123	AVARTSIKIVRLTTGSEYQFRVCAENRYGKS	Peptide575		0.0218475	0.0601385	-0.0458312	0.108495	0.122104	0.161423		-0.102009	0.0494159	0.0140666	0.0480535	-0.094595	0.173568		-0.178277	0.180496	0.0299705	0.17135	0.196448	0.377243		-0.0778978	-0.0678271	0.0192092	0.140674	0.0476315	0.139272		0.0832649	0.0198075	0.137356	-0.0650445	0.0332758	0.148968		0.200986	0.101545	0.100246	0.0561418	-0.139117	0.0431676		0.167447	-0.0556512
A0A0A0MTS7	TTN	S34359	CKAKLTVTLHPPPTDSTLRPMFKRLLA EC	Peptide576									-0.370071	-0.516792	-0.124085	0.0660466	0.0621865	-0.141159																							-0.265122	-0.602622	-0.0434506	-0.510662	-0.335084	-0.278661		-0.647425	-0.332742
A0A0A0MTS7	TTN	S1098	YFITKPVVQKLVEGGSVVFGCQVGGNPKPHV	Peptide577									0.388237	0.173499	0.454636	0.161872	-0.0167506	0.517488		0.111469	0.0423262	0.071594	-0.00388056	0.0744924	0.0274193		0.292509	0.183605	0.302033	0.108662	-0.0777655	0.156518		0.145061	0.234027	0.227139	0.166097	-0.119225	0.204312									0.0355897	0.155838
A0A0A0MTS7	TTN	S20077	DTTIPIECQEKLVPPSVELDVKLIEGLVVKA	Peptide578																														-0.0190744	-0.0905071	0.186282	-0.12236	-0.0672998	-0.0038243									-0.316959	0.0855745
A0A0A0MTS7	TTN	S14683	LDIEDREIKLVRPLHSVEVMETETARFETEI	Peptide579		0.0492243	-0.229593	-0.174046	0.0482527	0.142156	-0.0177149		-0.151904	-0.309234	-0.0978351	0.310731	0.219593	0.185135		-0.183598	-0.3262	-0.00655749	-0.0541438	0.0163566	-0.199283		-0.280569	-0.082306	-0.00322533	-0.113789	0.144374	0.0707395		0.150363	-0.101594	-0.218081	-0.0384734	-0.10144	0.175958		0.117848	0.125359	0.208383	0.0946814	-0.170431	-0.26208		-0.199646	-0.00969876
A0A0A0MTS7	TTN	S1400	APLGAPTYIPTLEPVSRIRSLSPRSVSRSPI	Peptide580																-0.217954	-0.319808	-0.372422	-0.215252	0.0767075	-0.225393		-0.560764	-0.304502	-0.369736	-0.388635	-0.283633	-0.341689		-0.380028	-0.504967	-0.27337	-0.298531	-0.288194	-0.297872		-0.367944	-0.135445	-0.519033	0.0861518	0.0999595	-0.192765		0.120042	-0.631254
A0A0A0MTS7	TTN	S34488	VQKQIDKTLRMAEILSGTESVPLTQVAKEAL	Peptide581																0.211524	-0.0581821	0.18174	0.193599	0.103541	0.167607		-0.0201128	-0.0420845	0.158077	0.0735409	-0.00108665	-0.0233219		0.0304497	-0.0814175	0.182513	-0.00439753	-0.0700747	-0.0537233		0.0903977	0.0205463	0.133668	0.158439	0.410604	0.259012		-0.139091	0.0639241
A0A0A0MTS7	TTN	S34492	IDKTLRMAEILSGTESVPLTQVAKEALREAA	Peptide582									0.192187	0.260747	0.505091	0.455989	0.257112	0.473755									0.0606045	-0.149292	0.328689	0.202727	0.250141	0.267254		0.0519758	-0.145536	0.412283	0.0880768	0.0544907	0.111044		-0.214693	-0.33581	-0.074596	-0.206066	0.0596859	0.16041		-0.128642	-0.212599
A0A0A0MTS7	TTN	S3208	RHKYVVERRIHRMFISETRQSDAGEYTFVAG	Peptide583		-0.280991	0.0581248	-0.000605969	0.0218375	0.136229	0.186763		0.0754781	0.0224742	0.204922	-0.22361	-0.119116	-0.0653809		-0.0617732	0.229403	-0.0984182	0.0142768	0.184819	-0.0766015		0.0171698	-0.011922	-0.0247143	-0.000507389	-0.0544127	0.0116617		-0.0516394	0.028731	0.140856	-0.0538691	0.0288107	-0.0219472		0.0244016	-0.0492749	-0.0905974	0.0957309	0.0930416	-0.0215542		-0.00676034	0.183878
A0A0A0MTS7	TTN	S3213	VERRIHRMFISETRQSDAGEYTFVAGRNRSS	Peptide584		-0.056881	-0.152552	0.236976	0.0513564	0.210368	0.159721		0.0164259	-0.0813774	0.230178	-0.0185596	0.0287214	0.0613285		-0.31149	0.108716	0.0192963	0.183823	0.315871	0.236684		0.0234658	-0.128726	0.115933	0.0939227	0.0379377	0.163999		-0.0287779	-0.0416536	0.110308	0.0326809	0.190998	0.137047		0.0794859	-0.0057484	0.0423586	0.134249	0.131446	0.025297		0.0374061	-0.0809067
A0A0A0MTS7	TTN	S2363	KLKMKPRPIAILQGLSDQKVCEGDIVQLEVK	Peptide585		0.673939	-0.523066	1.07675	0.778057	0.435757	0.614047		0.754433	0.195783	1.17155	0.304856	0.572744	0.460159		0.581354	0.144453	0.673211	0.458097	0.592367	0.472236		0.751797	0.0741076	1.13828	0.491229	0.429853	0.265987		0.511906	0.206541	0.945794	0.611239	0.462108	0.535555		0.59837	0.153141	0.806407	0.405385	0.4388	0.487065		0.565638	0.338258
A0A0A0MTS7	TTN	S30581	EIEKRMNMEITDVLGSTSLFVRDATRDHRGV	Peptide586									-0.200275	-0.241884	-0.0931355	-0.354925	0.038578	-0.0888716		-0.338385	-0.261724	-0.209063	-0.29611	0.00402971	-0.0995104		-0.180017	-0.311766	-0.108111	-0.178247	-0.102285	-0.0941986		-0.286069	-0.18912	-0.00503854	-0.271067	0.0580298	-0.142908		-0.170647	-0.337829	-0.122631	-0.000895939	0.137088	-0.0223444		-0.10214	-0.34376
A0A0A0MTS7	TTN	S30583	EKRMNMEITDVLGSTSLFVRDATRDHRGVYT	Peptide587																0.0623325	-0.0340373	0.0905514	0.0417629	0.229148	0.156517		-0.253032	-0.23316	-0.225842	-0.0993121	-0.10695	-0.0408381		-0.168436	-0.150177	0.0325806	-0.172343	-0.132546	-0.18729		0.0362274	-0.111503	0.0092653	0.00924474	-0.152491	0.0606987		-0.21625	-0.0195732
A0A0A0MTS7	TTN	S28335	DQRYEFRVFAR ADSVSEPSESTGPIIVKD	Peptide588		-0.124091	-1.41112	0.0135859	0.06959	-0.221538	0.0882105		0.175017	-1.2958	0.260676	-0.235938	-0.389893	-0.381201																							-0.108299	-0.513455	-0.157853	-0.293642	0.429736	-0.159924
A0A0A0MTS7	TTN	S28337	RYEFRVFAR ADSVSEPSESTGPIIVKDDV	Peptide589																							0.156769	-0.297401	0.204743	-0.0207499	-0.233971	-0.0541376		-0.144688	-0.536504	0.348927	-0.229005	0.0372345	-0.0814196									-0.215051	-0.567472
A0A0A0MTS7	TTN	S28342	VFAR ADSVSEPSESTGPIIVKDDVEPPRV	Peptide590									-0.0396896	-0.662371	0.310152	-0.0207918	0.0447139	0.165366		-0.6255	-0.466662	-0.1031	-0.282143	0.171464	-0.00671625		0.0121171	-0.606417	0.135032	-0.0426774	-0.0288785	-0.148018									-0.103402	-0.459007	0.11841	-0.193212	0.022363	-0.134949		-0.359984	-0.336808
A0A0A0MTS7	TTN	S26176	FRVIAK AGAISKPSDSTGPITAKDEVELP	Peptide591									0.662579	0.448486	0.706797	0.221669	0.431512	0.497076		0.271962	-0.0591553	-0.0426531	0.0223362	0.0970313	0.221473									0.204477	0.00297752	0.443493	0.416395	-0.133973	0.405055
A0A0A0MTS7	TTN	S26178	VIAK AGAISKPSDSTGPITAKDEVELPRI	Peptide592		0.145103	-0.491138	0.587705	0.210053	0.0656658	0.178184		0.671835	0.383111	1.08606	0.531544	0.435315	0.685159		0.329964	0.0931452	0.608473	0.186473	0.420965	0.461495									0.51935	0.292189	0.789474	0.505143	-0.00401457	0.649542									0.259176	0.363609
A0A0A0MTS7	TTN	S27260	VIAR AGNFSEPSDSSGAITARDEIDAP	Peptide593																0.0769781	0.0253125	0.0741331	0.114955	0.00972108	0.138798		-0.0636011	-0.0306913	-0.0609086	0.0108308	-0.0669918	-0.0735065		-0.0773509	0.00553401	0.110857	-0.0574119	-0.137655	-0.0146451									-0.104634	-0.0663192
A0A0A0MTS7	TTN	S25096	VIAR AGVFSEPSESTGAITARDEVDPPRI	Peptide594		-0.258372	-0.897797	0.0766681	0.0556766	0.323187	0.0786761		-0.411004	-1.03268	0.0127549	-0.613845	-0.238257	-0.357549		-0.598051	-0.351597	-0.169208	-0.348194	0.0398103	-0.244506		-0.490405	-0.680861	-0.150721	-0.33955	-0.261917	-0.265577									0.0427708	-0.235758	0.136143	0.0380782	0.011546	-0.135641		-0.338446	-0.51971
A0A0A0MTS7	TTN	S19865	EDGGIYSLTVENPAGSKTVSVKVLVLDKPGP	Peptide595		0.153478	-1.23902	0.161896	0.450161	0.0340666	0.241159		-0.252509	-1.06347	0.298667	0.156387	0.110307	0.0238048																							0.332476	-0.385099	0.411283	0.0205368	-0.140057	0.185733		-0.514369	-0.414218
A0A0A0MTS7	TTN	S29521	LNSGCYELKLR MGSASATIRVQILDKPGP	Peptide596		0.227786	-0.197622	0.379984	0.33624	0.17291	0.301219		0.235898	-0.014935	0.442256	0.193599	0.176499	0.239234		0.222318	0.182095	0.231907	0.174397	0.284488	0.276161		0.25729	0.0297198	0.293076	0.227709	0.105203	0.206419		0.223182	0.130918	0.384067	0.16074	0.157234	0.23805		0.303095	0.193263	0.349672	0.202075	-0.128732	0.260732		0.295006	0.209031
A0A0A0MTS7	TTN	S35767	RSRNVYSLEIR SVSDSGKYTIKAKNFRGQ	Peptide597																0.123846	0.185559	0.17331	-0.0284316	0.088072	0.147676		0.212246	-0.229663	0.351603	0.0548687	-0.0860883	0.0711152		0.0554343	0.00705195	0.351732	-0.064213	-0.095318	0.150767									0.0858874	-0.125861
A0A0A0MTS7	TTN	S30511	IIAR VGTISPPSQSSGIIMTRDENVPPIV	Peptide598																							-0.59662	-1.0797	-0.505125	-0.475159	-0.520602	-0.276401									-0.165736	-0.236715	-0.0144596	0.0370807	0.317458	-0.25916		-0.768423	-0.588552
A0A0A0MTS7	TTN	S31004	NDAGKYTLTVENNSGSKSITFTVKVLDTPGP	Peptide599		0.243845	0.180476	0.0675025	0.195124	0.32124	0.303509									0.823256	0.0950347	0.36539	0.395354	0.189742	0.340963		-0.0171787	-0.392345	0.0793677	-0.375155	-0.314265	-0.159899		-0.384988	-0.479982	0.170481	-0.257255	0.0362341	-0.241625		0.0705359	-0.104521	0.114322	0.230915	0.501496	0.110654
A0A0A0MTS7	TTN	S17009	EVKASDRLTMKNDHISAHLEVPKSVRADAGI	Peptide600									-0.289299	-0.793811	-0.110536	-0.123885	-0.017932	-0.307956																							-0.180926	-0.672613	-0.211711	-0.46586	-0.524733	-0.0892867
A0A0A0MTS7	TTN	S15250	GAKAKWFRNEEAIFDSSKYIILQKDLVYTLR	Peptide601		0.777122	-0.267059	0.952615	0.837681	0.480267	0.573164		0.761607	0.0805851	1.11385	0.336417	0.616077	0.57414		0.603448	0.128659	0.665768	0.359182	0.572236	0.511151		0.720054	0.151321	0.962729	0.474159	0.53344	0.415484		0.528369	0.172327	1.01592	0.474558	0.625658	0.554144		0.763622	0.136533	0.846114	0.481484	0.501145	0.733319		0.534704	0.412991
A0A0A0MTS7	TTN	S15251	AKAKWFRNEEAIFDSSKYIILQKDLVYTLRI	Peptide602		0.712892	-0.119783	0.794913	0.677747	0.36391	0.529616		0.666172	0.331435	1.00664	0.484946	0.557325	0.67361		0.577586	0.121473	0.705843	0.412084	0.648274	0.587597		0.692223	0.202682	0.96408	0.541574	0.606231	0.398907		0.557768	0.260089	0.971109	0.484084	0.557778	0.583195		0.624901	0.100744	0.709246	0.360863	0.458101	0.506569		0.498308	0.326124
A0A0A0MTS7	TTN	S29051	KEQLEPPEIDMKNFPSHTVYVRAGSNLKVDI	Peptide603		-0.433523	-1.63674	0.146615	0.0307008	-0.141409	-0.146021		-0.284418	-0.63054	0.486752	0.105469	-0.134032	0.177686																														-0.554751	-0.671553
A0A0A0MTS7	TTN	S15348	KWTKNGEEVPFDNRVSYRVDKYKHMLTIKDC	Peptide604		0.0228346	-0.2442	0.366701	0.180064	0.214226	0.217694		0.1713	0.251282	0.433804	0.069994	0.270517	0.21121		0.0768189	0.0396837	0.211084	0.11015	0.352221	0.193696		0.125128	0.0122413	0.337025	0.243095	0.231747	0.181166		0.31248	0.0105935	0.437097	0.00978472	0.221288	0.245903		0.162674	-0.0130671	0.319808	0.0692856	0.0105527	0.0445339		0.179484	0.0346494
A0A0A0MTS7	TTN	S16882	KHIAIAWKPPEKNGGSPIIGYHVEMCPVGTE	Peptide605		-0.275531	-1.77394	-0.264269	0.0959899	-0.0890433	-0.0836994																																					-0.760305	-0.456602
A0A0A0MTS7	TTN	S23877	HVERKERNGILWQTVSKALVPGNIFKSSGLT	Peptide606																							-0.134089	-0.675702	-0.419735	-0.381162	-0.584587	-0.469858
A0A0A0MTS7	TTN	S2749	NVKGVQWIKNGVVLESNEKYAISVKGTIYSL	Peptide607		0.0897944	-0.506032	0.606182	0.160193	0.297607	0.207536		0.680493	0.361068	1.19673	0.346312	0.595353	0.620382		-0.0358878	0.121484	0.282331	0.172359	0.511125	0.426058		0.538666	0.0316077	0.791684	0.520533	0.415813	0.334185		0.640622	0.281639	0.774818	0.376046	0.130953	0.510881									0.472966	0.145549
A0A0A0MTS7	TTN	S15043	EEEAVFTKNLANIEVSETDTIKLVCEVSKPG	Peptide608																0.302979	-0.100706	0.176719	0.0478196	0.144971	0.202182		-0.255417	-0.312641	0.175759	-0.416654	-0.308909	-0.110419		-0.402353	-0.120635	-0.300295	-0.45373	0.20134	-0.306867		0.217431	-0.234182	0.269979	0.301736	0.462229	0.321077
A0A0A0MTS7	TTN	S21925	IKMAMQRNLCTLELFSVNRKDSGDYTITAEN	Peptide609																0.444519	0.255824	0.222693	0.243667	0.107736	0.30871		0.0301367	0.13974	-0.064474	-0.0918032	-0.0447632	-0.1597		-0.0334686	0.136492	0.0228249	-0.00545114	-0.168912	-0.0960887									-0.114741	0.257445
A0A0A0MTS7	TTN	S18883	GEPLDSEPETARNLFSVPGAPDKPTVSSVTR	Peptide610		0.176696	-1.0654	0.00394342	0.122225	-0.0788432	0.226372		0.0248092	-0.65574	0.28514	-0.0212416	0.14297	-0.042889		-0.226023	-0.639603	-0.00287265	-0.394784	-0.207452	-0.302321		-0.187906	-0.621283	0.116964	-0.0812046	0.154775	-0.0850475		0.0782367	-0.571759	0.170209	0.0245428	-0.000856165	-0.28449		0.0361855	-0.426024	0.190223	-0.0770223	0.0819671	-0.134583		-0.35704	-0.422471
A0A0A0MTS7	TTN	S18894	RNLFSVPGAPDKPTVSSVTRNSMTVNWEEPE	Peptide611									-0.150268	-1.11108	-0.203548	-0.423299	-0.423879	-0.394971									-0.323351	-0.79157	-0.239129	-0.469962	-0.529411	-0.387438									-0.511287	-1.05174	-0.600407	-0.552623	-0.261603	-0.296096		-0.271489	-0.802431
A0A0A0MTS7	TTN	S18895	NLFSVPGAPDKPTVSSVTRNSMTVNWEEPEY	Peptide612		0.120271	-0.386452	0.417221	0.179935	0.322708	0.163818		0.689278	0.496249	0.860503	0.397913	0.417186	0.547896		0.333191	0.186037	0.305059	0.141002	0.377956	0.174113		0.507529	0.412598	0.617243	0.289104	0.397089	0.188551		0.547041	0.309253	0.674316	0.442872	0.113914	0.370425									0.409259	0.247216
A0A0A0MTS7	TTN	S29882	PPPTVTWRKDEKNLGSDARYSIENTDSSSLL	Peptide613																0.279707	0.229335	0.148135	0.163211	0.0858564	0.221631		0.117179	0.176747	0.106244	0.0806846	-0.102817	-0.0448343		0.0600608	0.236196	0.160239	0.0837897	-0.24529	-0.028437									0.0316973	-0.0357647
A0A0A0MTS7	TTN	S23610	LTEGEEYTFQVMAVNSAGRSAPRESRPVIVK	Peptide614		-0.0170028	-0.102042	0.147219	0.161736	0.113092	0.141871		0.0330459	-0.198018	0.296408	0.0697812	0.0621624	0.0959676		-0.0404389	-0.0439607	0.0458772	0.160438	0.175416	0.265301		0.0129796	-0.0857071	0.120472	0.0625781	0.0735149	0.13131		-0.0275115	0.0104717	0.155568	0.0408638	0.0974971	0.149929		0.115856	-0.034839	0.120843	0.0688101	0.0699883	0.0448077		0.0547218	0.0242074
A0A0A0MTS7	TTN	S35743	EPSPEIEWFKNNLPISISSNVSISRSRNVYS	Peptide615																														-0.338313	-0.37369	-0.0315363	-0.516011	-0.239587	-0.192173		-0.223237	-0.487183	-0.151674	0.0376195	0.119675	0.150215
A0A0A0MTS7	TTN	S35745	SPEIEWFKNNLPISISSNVSISRSRNVYSLE	Peptide616									0.0138053	-0.515059	0.083356	-0.202747	0.100648	-0.115162
A0A0A0MTS7	TTN	S35746	PEIEWFKNNLPISISSNVSISRSRNVYSLEI	Peptide617		0.0948967	-0.0555743	0.399828	0.334835	0.328649	0.195234		0.320755	-0.0360321	0.529275	0.206826	0.166394	0.404153		-0.180872	-0.266465	0.0371503	-0.156311	0.152471	0.0408487		0.315412	0.0670449	0.401515	0.152599	0.252753	0.212402		0.229022	0.136151	0.2925	0.126784	0.156914	0.282636		0.164172	0.014013	0.34063	0.328742	0.921963	0.0357329		0.245153	0.14089
A0A0A0MTS7	TTN	S35500	SDSGLYTCTVKNSAGSVSSSCKLTIKAIKDT	Peptide618																0.00981681	-0.296813	0.00363798	-0.244291	-0.184785	-0.111195		-0.0608132	-0.737392	-0.117691	-0.284562	-0.447655	-0.295935																-0.192154	-0.407662
A0A0A0MTS7	TTN	S35502	SGLYTCTVKNSAGSVSSSCKLTIKAIKDTEA	Peptide619																0.641996	0.14186	0.470489	0.244146	0.202208	0.322875		0.390133	0.0585211	0.206772	0.0056718	-0.161163	0.0594026		0.0958872	-0.00439054	0.483084	0.00313431	-0.109464	0.20817									0.10713	0.0611014
A0A0A0MTS7	TTN	S1593	RATGNPNPDIVWLKNSDIIVPHKYPKIRIEG	Peptide620									0.135678	-0.142899	0.346265	0.388159	0.124484	0.166724																														-0.438911	-0.189261
A0A0A0MTS7	TTN	S31804	GPGVPVESEPIVARNSFTIPSPPGIPEEVGT	Peptide621																																												-0.7657	-0.406735
A0A0A0MTS7	TTN	S31809	VESEPIVARNSFTIPSPPGIPEEVGTGKEHI	Peptide622																																												-0.617306	-0.350718
A0A0A0MTS7	TTN	S20561	KYIISAKNSSGHAQGSAIVNVLDRPGPCQNL	Peptide623		0.367312	-0.321111	0.39854	0.548549	0.291302	0.583759		0.364463	-0.0846831	0.580373	0.0625317	-0.00732883	0.247223		0.502989	0.112029	0.431242	0.372098	0.330191	0.377495		0.269504	0.000743413	0.394317	0.239143	0.195613	0.177603		0.296764	0.0567984	0.373199	0.137307	0.174296	0.468443		0.350001	0.142295	0.468816	0.233445	0.0875608	0.356581		0.246102	0.200628
A0A0A0MTS7	TTN	S22931	IRAKNTAGAISAPSESTETIICKDEYEAPTI	Peptide624									0.243338	0.01251	0.598025	0.380891	0.0980046	0.37665																														-0.544116	0.120301
A0A0A0MTS7	TTN	S32389	TGEYTLELKNVTGTTSETIKVIILDKPGPPT	Peptide625		0.62565	0.0460644	0.742942	0.711031	0.464972	0.575748									0.471069	0.561495	0.907675	0.737241	0.699465	0.814009		0.142298	-0.258428	0.358958	0.0506723	0.0314578	0.0404167		0.0931492	-0.119791	0.555286	-0.0860704	0.167519	0.17219		0.528219	0.162563	0.681743	0.372164	0.666608	0.437976		0.0630124	0.163434
A0A0A0MTS7	TTN	S755	RISAAKVAEPPQRPASEPHVVPKAVKPRVIQ	Peptide626		0.411562	-0.482037	0.624144	0.533855	0.195823	0.392205		0.101948	-0.43373	0.122602	0.273521	0.138868	0.390897		0.346436	-0.436389	0.616179	0.395823	0.295828	0.345513		0.320756	-0.495634	0.438947	0.175099	0.160798	0.206845		0.372183	-0.427742	0.606417	0.286197	0.0012249	0.167977		0.231846	-0.0877923	0.583089	0.421465	0.475599	0.076541		0.0679131	-0.347265
A0A0A0MTS7	TTN	S22186	SSVSLSWGKPAYDGGSPIIGYLVEVKRADSD	Peptide627									0.669253	-0.0579084	1.0423	0.557682	0.604053	0.84223									0.383276	-0.143477	0.769407	0.264084	0.484221	0.426336		-0.00423778	-0.160755	0.551479	-0.0661612	0.629648	0.521722		-0.0589007	-0.48705	0.521974	0.179232	0.90523	0.031784		-0.216165	-0.164049
A0A0A0MTS7	TTN	S29663	NSMTVVWSRPIADGGSDISGYFLEKRDKKSL	Peptide628																														-0.284614	-0.460474	0.372168	-0.251053	0.284658	0.0739412		-0.0332938	-0.53566	0.30943	0.201891	0.65982	0.13677		-0.537649	-0.357175
A0A0A0MTS7	TTN	S29666	TVVWSRPIADGGSDISGYFLEKRDKKSLGWF	Peptide629																1.03476	0.0978199	0.788619	0.839321	0.535672	0.727467									-0.35596	-0.564522	0.549227	-0.191002	-0.103344	-0.0579999		0.219795	-0.216908	0.431529	0.126843	0.137114	0.504694
A0A0A0MTS7	TTN	S34876	RPQPAEEYEDDTERRSPTPERTRPRSPSPVS	Peptide630		0.616752	-0.0788617	0.658865	0.425312	0.22341	0.292512									0.911514	0.310062	0.796385	0.673828	0.585163	0.579636		0.306193	-0.0838759	0.727676	0.224996	0.139433	0.0603811		0.347101	-0.132183	0.761799	0.214077	0.0530271	0.360665									0.256391	0.0779311
A0A0A0MTS7	TTN	S34886	DTERRSPTPERTRPRSPSPVSSERSLSRFER	Peptide631		0.182274	0.418064	-0.00847517	0.0357635	0.00979309	-0.0899228		0.139767	0.0515453	0.120505	-0.0956537	0.0463556	0.0363593		0.0878319	0.0914463	0.058744	0.147665	0.186155	0.061583		0.103512	0.0863687	0.0492016	0.102027	0.0145345	0.0640016		0.104064	0.0594232	0.0801524	-0.00747638	0.217389	-0.0174369		0.147254	0.0941976	-0.0213503	0.0237213	0.188324	0.147987		-0.0158211	0.152244
A0A0A0MTS7	TTN	S34888	ERRSPTPERTRPRSPSPVSSERSLSRFERSA	Peptide632		-0.169717	0.422623	-0.133531	-0.229405	-0.424086	-0.136416		-0.215977	-0.22166	-0.0462689	-0.382212	-0.0136182	0.212889		-0.287807	-0.166479	-0.376298	-0.333936	-0.133249	-0.153515		0.0319685	-0.0486914	-0.0484872	-0.113145	-0.123343	-0.1062		-0.0563204	-0.0488654	-0.201555	-0.208296	-0.119717	-0.195127		0.035506	-0.0681437	-0.093972	-0.00693893	-0.0867807	0.0182504
A0A0A0MTS7	TTN	S20359	RVFAENLAGLSKPSPSSDPIKACRPIKPPGP	Peptide633																							0.293929	-0.194375	0.598018	0.239966	0.117142	0.177717		0.13064	-0.158288	0.599715	0.0410119	0.210891	0.0761275									-0.0266126	-0.235688
A0A0A0MTS7	TTN	S1465	QLERLYKPVFVLKPVSFKCLEGQTARFDLKV	Peptide634																0.018776	-0.106657	0.0571079	-0.275843	0.0380273	-0.01923		-0.111393	-0.667121	-0.0369348	-0.495736	-0.704473	-0.870591
A0A0A0MTS7	TTN	S29764	SSITLGWSKPVYDGGSAVTGYVVEIRQGEEE	Peptide635									-0.295634	-0.804817	-0.00787429	-0.382056	0.117159	-0.355815									-0.444667	-0.880336	-0.147639	-0.373726	-0.323332	-0.438863									-0.507342	-0.851641	-0.340488	-0.384293	-0.124735	-0.410947
A0A0A0MTS7	TTN	S35834	QSVQMSASKQEASFSSFSSSSASSMTEMKFA	Peptide636																							-0.316132	-0.497403	0.212019	-0.348788	-0.162224	-0.394827		-0.43631	-0.617629	0.113301	-0.646783	0.441384	-0.535277
A0A0A0MTS7	TTN	S353	GPEVPPPWKQEGYVASSSEAEMRETTLTTST	Peptide637																														-0.302492	-0.369415	-0.304317	-0.460441	0.337844	-0.372905									-0.487809	0.022844
A0A0A0MTS7	TTN	S354	PEVPPPWKQEGYVASSSEAEMRETTLTTSTQ	Peptide638		0.174848	0.143774	0.0145622	0.0910052	0.487929	-0.0577054		0.0373183	0.0870179	0.10743	-0.288525	0.153515	0.117426		-0.196984	0.0244969	-0.161943	0.160874	0.297799	0.0365501		0.0209588	0.245489	-0.0104881	0.191304	0.22531	-0.0424036		-0.169744	0.0850802	-0.261456	-0.365674	0.990268	0.193702		0.271737	0.331897	0.0193623	-0.0686746	0.454103	0.0295184		0.173905	0.0556419
A0A0A0MTS7	TTN	S355	EVPPPWKQEGYVASSSEAEMRETTLTTSTQI	Peptide639		0.159661	0.367425	0.101664	0.0919028	0.180888	-0.139854		-0.010859	-0.00406977	0.224333	-0.23352	-0.0301455	-0.330939		-0.126883	0.000198243	-0.113567	0.248219	0.270803	-0.0110428		-0.0814484	0.0452235	-0.0233673	0.0290526	0.210094	0.0056263		-0.185355	-0.0244265	-0.251168	-0.285458	0.971355	-0.133133		0.190009	0.272105	0.254885	-0.0664667	0.441185	-0.196468		0.0243395	0.195124
A0A0A0MTS7	TTN	S32057	PPPVITWSKQGIDLASRAIIDTTESYSLLIV	Peptide640		-0.0809986	-0.0904975	0.124728	-0.121588	0.117775	-0.213244		0.186819	0.43993	0.468398	0.27522	0.0665138	0.317671		-0.247877	0.462874	-0.131425	0.12605	0.276808	0.26746		0.211276	0.216544	0.0736452	0.328973	0.0807834	0.140633		0.271073	0.404072	0.260536	0.170777	-0.226315	0.232242									0.185424	0.200301
A0A0A0MTS7	TTN	S29702	TIRDTRQKVTGLTENSDYQYRVCAV AGQG	Peptide641		-0.0523501	0.353009	-0.0110403	-0.0748238	0.126207	0.0151548		0.200196	-0.111093	0.0831916	-0.188508	-0.028983	-0.0350612		0.454465	0.223517	0.0439146	0.278238	0.156261	0.254553		0.0311083	0.0102981	0.118615	0.0604684	-0.146167	0.0996275		-0.0447747	0.0470318	0.0741914	0.114568	-0.000678773	0.00238791		0.0443412	-0.0502249	-0.121583	-0.00345263	0.00980736	0.0938647		0.204051	0.34909
A0A0A0MTS7	TTN	S17820	DAKMHTWRQPIETERSKCDITGLLEGQEYKF	Peptide642																-0.227937	0.11231	0.137808	-0.121742	0.0931454	0.236859																							-0.46222	-0.538596
A0A0A0MTS7	TTN	S282	TPPSIAAKAQLARQQSPSPIRHSPSPVRHVR	Peptide643		0.0866031	0.115331	0.0450536	0.266796	0.156012	0.255902		0.0857054	-0.130408	-0.119534	-0.00496986	-0.100264	0.0814646		0.178162	0.0972241	0.0924347	0.127881	0.216768	0.254833		-0.00225079	-0.0842856	-0.08443	0.0480607	0.00362371	0.286924		0.115435	0.00783686	0.0521317	0.0128567	-0.0190944	0.141657		0.211909	0.0940569	0.0642601	0.218112	0.126815	0.277974		-0.0476627	-0.0262047
A0A0A0MTS7	TTN	S284	PSIAAKAQLARQQSPSPIRHSPSPVRHVRAP	Peptide644		-0.120061	-0.297186	-0.107265	0.109877	0.0327092	0.06406		-0.00102205	-0.503679	-0.214612	-0.0208174	-0.25765	0.0411815		-0.0614632	-0.284437	-0.0510919	0.0368571	-0.0353683	0.013324		-0.0602443	-0.29008	-0.166958	-0.146942	-0.259654	0.025484		-0.0375357	-0.409564	-0.0814163	-0.0871981	-0.0945854	0.0341336		0.165077	-0.175895	-0.0734975	-0.00955935	-0.212254	0.0583042		-0.139905	-0.146677
A0A0A0MTS7	TTN	S289	KAQLARQQSPSPIRHSPSPVRHVRAPTPSPV	Peptide645																0.0601086	0.0438162	0.106105	0.140333	0.0522122	0.192619		-0.238396	-0.128155	-0.287538	-0.212092	-0.239695	-0.146914		-0.273419	-0.171545	-0.116821	-0.199915	-0.208125	-0.30467		-0.149503	-0.125698	0.00367038	0.291493	0.16316	-0.0706327		-0.369454	-0.113171
A0A0A0MTS7	TTN	S23771	GVPISNYVVEMRQTDSTTWVELATTVIRTTY	Peptide646																-0.324014	-0.22094	-0.078095	-0.281593	-0.0161319	-0.0203181																							-0.49566	-0.415164
A0A0A0MTS7	TTN	S20698	TFVYLKWRRPDYDGGSPNLSYHVERRLKGSD	Peptide647		-0.170273	0.144606	0.0405544	-0.0364747	0.323018	0.0710453									0.125198	0.166442	-0.074453	0.0226338	0.042184	0.230456		-0.0804203	0.0430899	0.00275757	-0.135133	-0.316406	0.089191		-0.173597	-0.0265094	-0.118245	-0.167576	0.148377	-0.0475344									0.179698	-0.330669
A0A0A0MTS7	TTN	S20702	LKWRRPDYDGGSPNLSYHVERRLKGSDDWER	Peptide648		-0.193083	-0.343887	0.100813	0.0249406	0.0394266	0.0616776									-0.131557	-0.240297	0.234204	0.037736	0.0660691	0.108569		-0.12827	-0.486336	-0.151236	0.0412735	-0.114955	-0.0866373																-0.398086	-0.334525
A0A0A0MTS7	TTN	S30776	KKSTRWVKVISKRPISETRFKVTGLTEGNEY	Peptide649																0.212977	0.165656	0.142015	0.177531	0.0364132	0.205434		-0.199265	-0.178281	-0.307572	-0.172721	-0.139381	-0.135177		-0.133674	-0.128805	-0.0061683	-0.252749	-0.0797629	-0.307546		0.107366	0.0542525	0.030785	0.185868	0.173658	0.229468		-0.320416	-0.00213541
A0A0A0MTS7	TTN	S23169	NTATVSWKRPVDDGGSEITGYHVERREKKSL	Peptide650		-0.154289	0.104442	0.0268721	0.0297762	-0.0245094	-0.0416461		0.229154	-0.168246	0.255183	-0.286373	-0.0446853	0.124852		0.0624608	-0.0373865	-0.102168	0.109485	0.122052	0.0889806		0.0264812	0.00650887	0.00701322	0.0223948	-0.0426912	0.0637968		0.0284461	-0.0555949	0.0569163	0.00685085	0.0687102	0.0214023		0.0925985	-0.0471531	0.0127174	-0.104451	-0.0847952	-0.0362707		0.160938	-0.0935866
A0A0A0MTS7	TTN	S34641	QDDLEIVRPARRRTPSPDYDFYYRPRRRSLG	Peptide651		0.100547	0.144662	0.136229	0.0254515	0.190371	0.170134		0.220572	0.148808	0.234846	0.224694	0.140645	0.296871		0.408765	0.0481036	0.171997	0.219014	0.108784	0.107703		0.109157	0.192815	0.220595	0.161319	0.174489	0.262187		0.25923	0.258778	0.233415	0.212923	-0.00625194	0.106843		0.123976	0.0712226	0.145872	0.168353	0.0439553	0.110224		0.389393	0.172521
A0A0A0MTS7	TTN	S18757	VVDDTCTLVIPQSRRSDTGLYTITAVNNLGT	Peptide652		0.115293	-0.165048	0.341682	0.393095	0.315099	0.15198		0.157957	-0.155942	0.33714	0.031409	0.194262	0.117877		0.134155	0.0168101	0.253929	0.188687	0.418471	0.391908		0.122462	-0.147404	0.324937	0.142306	0.177658	0.145647		0.127429	-0.025045	0.327974	0.124312	0.216646	0.175776		0.244196	-0.059493	0.324796	0.219638	0.131946	0.234665		0.132679	0.0119366
A0A0A0MTS7	TTN	S18774	TGLYTITAVNNLGTASKEMRLNVLGRPGPPV	Peptide653									0.0845512	-0.0382125	0.286598	0.237721	0.20345	0.260351																0.0221947	-0.337505	0.352571	0.0420381	-0.140995	0.10621		-0.259981	-0.58692	-0.295123	-0.299647	0.0567307	0.0322113
A0A0A0MTS7	TTN	S16324	NVPKKSTVTIVDSKRSDTGTYIIEAVNVCGR	Peptide654									0.366976	0.250804	0.297625	0.0944564	0.0954523	0.305375		0.32274	-0.138351	0.167779	0.0510773	0.0291857	0.205764		0.254351	0.246354	0.259972	0.137048	0.0544764	0.0676976		-0.0143086	0.0841395	0.3056	0.236378	0.116027	0.11087		-0.0759848	0.0112934	-0.0237994	-0.125889	-0.151113	-0.0080377		0.0850968	0.22643
A0A0A0MTS7	TTN	S34654	TPSPDYDFYYRPRRRSLGDISDEELLLPIDD	Peptide655		0.398738	-0.44069	0.482023	0.528457	0.372577	0.244763		0.292357	-0.0703945	0.470415	0.317986	0.364784	0.320825		0.379185	-0.0934052	0.528669	0.135029	0.424449	0.253706		0.198067	0.0236977	0.262693	0.167405	0.528021	0.2538		0.357359	-0.012945	0.518513	0.309148	0.193542	0.299581		0.287472	0.0889688	0.506251	0.32183	0.0338287	0.347578		0.107198	0.148527
A0A0A0MTS7	TTN	S34659	YDFYYRPRRRSLGDISDEELLLPIDDYLAMK	Peptide656		0.435983	-0.446201	0.507212	0.4495	0.301838	0.276877		0.277956	-0.202243	0.410944	0.267837	0.187855	0.380408		0.308823	-0.116262	0.493753	0.199464	0.361894	0.292061		0.247526	-0.197002	0.484129	0.210375	0.286714	0.20104		0.312362	-0.119872	0.479011	0.231783	0.233132	0.245203		0.293337	-0.0842121	0.418694	0.258274	0.281225	0.268019		0.0225062	0.0609914
A0A0A0MTS7	TTN	S34842	RESSSSASRLLRRRRSLSPTYIELMRPVSEL	Peptide657		-0.0404071	0.0221539	0.107166	0.0820803	0.143804	0.153546		-0.170854	0.0624834	0.0666442	-0.281113	0.0431299	-0.0817262		0.0263508	0.0334538	0.0858874	0.0483758	0.158259	0.0376195		-0.0613878	-0.0805398	-0.0293759	-0.0290841	0.032284	0.0415845		-0.00877554	0.204411	-0.153877	-0.0469016	-0.0607655	0.073096		0.0647783	0.0925854	0.0273061	0.139704	0.224724	-0.0159025		-0.108884	-0.0444288
A0A0A0MTS7	TTN	S34844	SSSSASRLLRRRRSLSPTYIELMRPVSELIR	Peptide658		0.0850652	-0.147058	0.0637377	0.153997	0.225744	0.396769		0.0707894	-0.330963	0.177618	0.00517898	0.0661515	0.065769		0.0442875	0.0726931	0.0134853	0.0613601	0.206755	0.0575066		-0.0394363	-0.0694074	0.0808793	0.0396467	0.0602047	0.120189		0.0855312	-0.213257	0.205975	-0.0131037	0.220997	0.0105029		0.196724	0.138048	0.120186	0.0793965	0.206182	0.127161		-0.0613872	-0.0792049
A0A0A0MTS7	TTN	S34855	RRSLSPTYIELMRPVSELIRSRPQPAEEYED	Peptide659																0.32805	0.163145	0.245477	0.310365	0.352789	0.438044		-1.21034	0.0308235	0.0979029	0.0510851	0.114332	0.204594		-0.131783	-0.253087	0.0355266	-0.102842	-0.0458277	-0.0239504		0.0862558	-0.020143	0.0533396	0.123582	0.168344	0.133428		-0.195612	0.0902696
A0A0A0MTS7	TTN	S17099	LERREAGRRTYIPVMSGENKLSWTVKDLIPN	Peptide660																							-0.423335	-0.85111	-0.183206	-0.367899	-0.247447	-0.385458									-0.0934955	-0.545816	0.245163	0.0908893	0.418769	-0.225526		-0.203605	-1.05655
A0A0A0MTS7	TTN	S14468	FELIKDGTKHSMVIKSAAFEDEAKYMFEAED	Peptide661									0.298233	-0.166289	0.380187	0.107827	0.0636711	0.0804349
A0A0A0MTS7	TTN	S35583	SKVLISEEVKKSAATSLEKSIVHEEITKTSQ	Peptide662																0.413904	0.190655	0.187869	-0.114306	0.28067	0.091848									-0.398739	-0.127929	0.0518207	-0.623603	-0.131974	-0.427407
A0A0A0MTS7	TTN	S423	AVATGAKEVKQDADKSAAVATVVAAVDMARV	Peptide663																																												-0.878149	-0.424598
A0A0A0MTS7	TTN	S24509	SGKYILTVENSSGSKSAFVNVRVLDTPGPPQ	Peptide664		-0.120063	0.285529	0.0105655	-0.116794	0.195939	-0.170887		0.226503	-0.0438856	0.235516	-0.185758	-0.0191052	0.059212		0.346526	0.168912	-0.0675514	0.0846218	0.177241	0.179929		0.161634	0.104599	0.0850782	0.0236638	-0.153248	-0.0297776		0.0714052	0.057298	0.195306	0.0417842	0.0151213	-0.0468554		0.208442	0.053298	-0.117671	-0.0121473	-0.349335	0.0609409
A0A0A0MTS7	TTN	S26673	AGKYILKLENSSGSKSAFVTVKVLDTPGPPQ	Peptide665		0.192946	-0.277719	0.229586	0.291892	0.280254	0.151089		0.254761	0.0624517	0.499253	0.147605	0.317995	0.189124		-0.0441021	-0.104864	0.182769	0.182046	0.312353	0.24481		0.164129	-0.171821	0.469974	0.253583	0.189065	0.198423		0.168042	0.0111536	0.415236	0.161451	0.251371	0.266373		0.207093	0.0332195	0.256119	0.273327	-0.00841242	0.153695		0.130523	0.120329
A0A0A0MTS7	TTN	S25591	SGKYTLTLENSSGTKSAFVTVRVLDTPSPPV	Peptide666		0.172968	0.0938191	-0.0210029	0.157181	0.102912	0.125038		0.139832	0.0863075	0.326143	-0.0198278	0.0794018	0.0557168		0.109383	0.127701	0.0233145	0.0611725	0.18586	0.142731		0.127848	0.00302023	0.0963409	0.265235	0.0511647	0.116217		0.192164	0.0792285	0.169474	0.0653307	0.0934683	0.0984831		0.203576	0.17525	0.127001	0.174441	-0.0664244	0.0552486		0.179643	0.120697
A0A0A0MTS7	TTN	S21016	EKKEKHSTRWVPVNKSAIPERRMKVQNLLPD	Peptide667																0.541185	0.317722	0.168759	0.168442	0.241971	0.286239		-0.138913	0.015905	-0.159802	-0.125219	-0.315124	-0.220884		-0.120209	0.0545247	0.0699028	-0.276035	-0.30807	-0.298161									-0.151445	0.106002
A0A0A0MTS7	TTN	S32095	AGKYTIEAENQSGKKSATVLVKVYDTPGPCP	Peptide668		0.0511489	0.0163823	0.112722	-0.0806743	0.195231	0.0896588		0.380743	0.099425	0.277973	-0.0962185	-0.0267956	0.0482475		0.45293	0.0747913	0.132101	0.230825	0.141031	0.220887		0.19642	0.161836	0.265208	0.0459065	-0.0534609	-0.0158886		0.110471	-0.00727457	0.319338	0.158372	-0.034877	0.102198		0.212382	-0.0535462	-0.105389	0.0160769	-0.235212	0.145725
A0A0A0MTS7	TTN	S28243	RVYAENIAGIGKCSKSCEPVPARDPCDPPGQ	Peptide669																														-0.0500068	-0.256462	0.0236095	-0.12528	-0.478693	-0.214829									-0.698364	-0.00519382
A0A0A0MTS7	TTN	S28704	EYKKSDDTDWKTSIQSLRGTEYTISGLTTGA	Peptide670		-0.0213106	-0.128768	0.35412	0.018907	0.165624	-0.151587		0.506673	0.406607	0.671792	0.180527	0.160136	0.360612		0.143336	0.220355	0.0906836	0.0228918	0.2725	0.207902		0.398057	0.255674	0.347056	0.282624	0.161828	0.124451		0.396286	0.261147	0.456997	0.325665	-0.139083	0.256374									0.278277	0.215863
A0A0A0MTS7	TTN	S20297	DITE ATVSWTLPKSDGGSPITGYYMERRE	Peptide671		0.201537	-0.263014	0.260962	0.324093	0.270392	0.352511		0.249903	-0.119572	0.319469	0.166542	0.15413	0.163035		0.149383	-0.127794	0.218564	0.147492	0.137116	0.0708658		0.127243	-0.054073	0.213223	0.203316	0.141987	0.199798		0.206064	-0.141301	0.247977	0.1294	0.293447	0.233615		0.29244	0.165205	0.368387	0.250053	0.119475	0.105732		0.0973214	0.0788815
A0A0A0MTS7	TTN	S20301	ATVSWTLPKSDGGSPITGYYMERREVTGK	Peptide672																														-0.349226	-0.598944	-0.0287626	-0.477291	-0.105995	-0.221746		-0.20306	-0.249218	-0.193555	-0.111593	0.166295	-0.104313
A0A0A0MTS7	TTN	S23699	TTATSTILNINECVRSDSGPYPLTARNIVGE	Peptide673		0.0715634	0.0164965	0.331677	0.125899	0.195921	0.194055		0.188398	-0.0552536	0.394764	-0.0427105	0.139556	0.147483		0.193599	0.161613	0.216337	0.196307	0.307006	0.203427		0.175539	0.0142427	0.246491	0.112703	0.140974	0.0547084		0.203678	0.0127974	0.295318	0.134124	0.169279	0.096503		0.252545	0.0847313	0.202138	0.161067	0.0214887	0.100285		0.109443	0.101478
A0A0A0MTS7	TTN	S23701	ATSTILNINECVRSDSGPYPLTARNIVGEVG	Peptide674		-0.350959	-1.10949	-0.268925	-0.370222	-0.162426	-0.24976		-0.00209249	-0.102977	0.211449	0.0301471	0.0779739	0.0949096									-0.163736	-0.389996	-0.043136	-0.10971	-0.111672	-0.102821																-0.410253	-0.368438
A0A0A0MTS7	TTN	S33489	GESEWSEISEPITPKSDVPIQAPHFKEELRN	Peptide675		0.262139	-0.235754	0.451312	0.433489	0.23366	0.386075		0.282936	0.143303	0.646902	0.204062	0.335722	0.473116		0.301866	0.0497216	0.369417	0.260281	0.417094	0.249088		0.358828	0.057098	0.507282	0.32656	0.281595	0.203102		0.342975	0.183026	0.439992	0.365911	0.221301	0.32806		0.323075	0.127344	0.42041	0.270462	0.0712234	0.19608		0.248843	0.196303
A0A0A0MTS7	TTN	S26276	GGQYILRASNVAGSKSFPVNVKVLDRPGPPE	Peptide676		0.214474	-0.148087	0.412449	0.440555	0.355878	0.332538		0.30838	-0.0509063	0.499477	0.109267	0.196247	0.166458		0.231509	0.189285	0.391459	0.326651	0.364555	0.421042		0.333802	-0.0684497	0.364509	0.269328	0.139989	0.179487		0.32401	0.150883	0.432323	0.126809	0.178712	0.264217		0.459765	0.212788	0.345695	0.30537	-0.0336335	0.216814		0.300804	0.179808
A0A0A0MTS7	TTN	S33649	DLIDNNGHYQVIVTRSFTSLVFPNGVERKDA	Peptide677		0.10495	0.220865	0.0323993	0.305178	0.185097	0.199875		0.0703216	-0.0827241	0.268035	-0.143215	-0.071947	-0.0385974		0.62179	-0.109628	0.235218	0.267159	0.359185	-0.0215317		0.0918474	-0.132591	0.204774	-0.0041255	0.297134	-0.158418		0.328837	-0.0747804	0.200435	0.163164	-0.000922402	-0.116516		0.165597	0.148279	0.185705	0.559431	0.0524759	-0.0244862		0.181653	0.136753
A0A0A0MTS7	TTN	S1118	CQVGGNPKPHVYWKKSGVPLTTGYRYKVSYN	Peptide678		-0.184271	0.179845	0.0263714	-0.0626561	0.273651	0.0146665		-0.0386804	0.133363	0.103557	0.0202775	0.0234574	-0.0183955		0.222355	0.113123	0.00392895	0.176394	0.265656	0.168494		0.0691098	0.0611023	0.0732407	0.0804183	-0.106856	0.098115		0.0352493	0.0508531	0.170939	0.0884073	-0.0870417	0.0616482		0.0847182	0.0447784	-0.0650222	-0.0258568	-0.0935244	0.00149881
A0A0A0MTS7	TTN	S19156	TTAISSSMVIKNCQRSHQGVYSLLAKNEAGE	Peptide679		0.23408	-0.0633958	0.257364	0.386638	0.271912	0.271175		0.194233	-0.0429017	0.337113	0.117331	0.162341	0.144234		0.354106	0.0946627	0.216642	0.310303	0.310635	0.230636		0.236375	-0.134931	0.345622	0.172654	0.261429	0.123697		0.230763	0.00163546	0.213746	0.279822	0.122129	0.254457		0.323454	0.112824	0.315481	0.239385	0.123813	0.173761		0.144007	0.084969
A0A0A0MTS7	TTN	S233	QTRIEKKIEAHFDARSIATVEMVIDGAAGQQ	Peptide680		0.351987	0.310017	0.254463	0.11992	-0.118247	0.0546984		0.211439	-0.244468	0.520553	0.257039	-0.22285	0.23181		0.148261	-0.0486867	0.32123	0.23029	0.0689812	0.191773		0.213535	0.0287969	0.5081	0.243209	-0.173429	0.118651		0.0941094	-0.154175	0.319624	0.106653	0.36872	0.0532361		0.234358	-0.037301	0.292677	-0.00786689	0.313743	0.115058		0.0701352	0.134702
A0A0A0MTS7	TTN	S27359	GGQYILKLSNVGGTKSIPITVKVLDRPGPPE	Peptide681		-0.0904485	-0.757672	-0.0335323	0.268656	-0.00446588	0.0780107		0.346169	-0.0517012	0.577273	0.219937	0.300168	0.262717									0.0304306	-0.276906	0.313463	0.136218	0.219908	0.175017		0.080593	-0.274602	0.331093	-0.157056	0.466753	0.0290396		0.159744	-0.292841	0.145936	0.264901	0.212964	-0.00195393		-0.0676597	-0.00855728
A0A0A0MTS7	TTN	S31006	AGKYTLTVENNSGSKSITFTVKVLDTPGPPG	Peptide682		0.209525	-0.111132	0.391025	0.301999	0.331308	0.261019		0.17719	0.103234	0.39894	0.105283	0.141592	0.228782		0.246472	0.231671	0.306461	0.284847	0.401655	0.273384		0.296835	0.000951397	0.302994	0.187156	0.192323	0.182437		0.292659	0.137068	0.317384	0.157068	0.24486	0.173429		0.315394	0.183489	0.266442	0.165918	0.0681827	0.20561		0.153843	0.226349
A0A0A0MTS7	TTN	S20994	EMTVVWNPPEYDGGKSITGYFLEKKEKHSTR	Peptide683		0.0860398	-0.720188	0.0955939	0.259828	-0.0598019	0.145384		0.410586	0.141157	0.582965	0.410831	0.368048	0.318923									0.201314	-0.0831326	0.325378	0.141389	0.279784	0.280621		0.21504	-0.173254	0.395762	0.0713236	0.417481	0.106339		0.194284	-0.180208	0.081532	0.206028	-0.032648	0.0958643		-0.0821484	0.0712764
A0A0A0MTS7	TTN	S35587	ISEEVKKSAATSLEKSIVHEEITKTSQASEE	Peptide684		-0.0674131	-0.791616	0.349986	0.341857	-0.139984	0.449835		0.823272	-0.34925	0.739233	0.577494	0.122129	0.137315									0.17353	-0.09242	0.681422	0.0281865	0.169477	0.297839		0.172813	-0.325054	0.710616	-0.162921	0.582689	-0.0529351		0.0791002	-0.0495829	-0.0527331	0.349645	0.415247	0.147794		-0.0584972	0.0191122
A0A0A0MTS7	TTN	S15754	GTGEPVETDNPVEARSKYDVPGPPLNVTITD	Peptide685									0.0906987	-0.183657	0.279505	0.133137	0.270473	0.222158		-0.809485	-0.889461	-0.421802	-0.692698	-0.235507	-0.453236									-0.0384413	-0.257188	-0.040497	-0.14131	0.207556	0.0266549		-0.234818	-0.302209	-0.041313	0.0559288	0.305754	-0.129494		-0.31941	0.09685
A0A0A0MTS7	TTN	S25784	FRVVAVNEKGRSDPRSLAVPIVAKDLVIEPD	Peptide686		0.116011	-0.105366	0.288248	0.302459	0.354912	0.295876		0.327229	0.0711276	0.422388	0.133577	0.102453	0.189508		0.191287	0.158566	0.214859	0.177597	0.182372	0.243999		0.25741	0.0263105	0.338394	0.192518	0.106535	0.236465		0.293423	0.0805159	0.353738	0.172478	0.232455	0.167996		0.34293	0.165333	0.233731	0.248544	0.0439507	0.182099		0.185692	0.035831
A0A0A0MTS7	TTN	S26392	PVLMKNPFVLPGPPKSLEVTNIAKDSMTVCW	Peptide687		0.333934	0.00377039	0.429147	0.385112	0.305572	0.30275		0.355983	0.090523	0.56983	0.134183	0.243734	0.257974		0.387625	0.188765	0.412621	0.360798	0.409383	0.352596		0.362038	0.0546143	0.493805	0.294278	0.228204	0.170103		0.300312	0.153358	0.471339	0.269091	0.313955	0.248003		0.394547	0.11984	0.40459	0.253211	0.138934	0.26501		0.191197	0.263627
A0A0A0MTS7	TTN	S17522	EKREVNSTHWSRVNKSLL LKANVDGLLEG	Peptide688									0.548934	0.423123	0.534077	0.515642	0.369767	0.310758		0.45774	-0.16272	0.294826	0.0665003	0.0511049	0.0360025		0.439008	0.246211	0.429266	0.239667	0.495549	0.364243		0.47873	0.0948369	0.475542	0.333782	0.272461	0.326483		0.307119	0.0167461	0.32201	0.218453	0.232041	0.260047		0.0435953	0.27818
A0A0A0MTS7	TTN	S25753	QAKHSEKWSECARVKSLQAVITNLTQGEEYL	Peptide689									-0.085993	-0.335447	-0.110311	-0.209526	-0.165258	-0.199375		-0.349358	-0.272835	-0.249016	-0.182556	0.0243147	-0.127468		-0.266396	-0.527149	-0.119769	-0.201745	0.0606513	-0.216538		-0.169364	-0.366526	-0.34389	0.0514155	-0.189239	-0.183881		-0.20658	-0.342233	-0.3603	-0.201685	-0.316073	-0.177522
A0A0A0MTS7	TTN	S22503	VDFLTEENKWQRVMKSLSLQYSAKDLTEGKE	Peptide690		0.30358	-0.210359	0.429893	0.4047	0.268703	0.311336		0.356023	0.120057	0.54004	0.172802	0.256227	0.286711		0.0547471	0.140298	0.340971	0.271399	0.34997	0.376103		0.326812	0.0297873	0.467101	0.243651	0.235098	0.227304		0.338918	0.134448	0.483826	0.188744	0.271697	0.283293		0.408783	0.136906	0.353775	0.240316	0.0751125	0.251212		0.267583	0.185716
A0A0A0MTS7	TTN	S22505	FLTEENKWQRVMKSLSLQYSAKDLTEGKEYT	Peptide691		0.0984111	-0.863989	0.0343451	0.317063	0.0672749	0.288904		0.324929	0.103776	0.562729	0.461236	0.233852	0.339154																0.108811	-0.0764936	0.276679	0.198976	0.225846	0.304964		0.112453	-0.177144	0.298431	-0.00121797	-0.00258762	0.0613764		-0.117106	0.137719
A0A0A0MTS7	TTN	S22509	ENKWQRVMKSLSLQYSAKDLTEGKEYTFRVS	Peptide692		0.233428	-0.427737	0.248561	0.201831	0.181971	0.220843		0.423229	0.040265	0.660098	0.190236	0.338214	0.267497		-0.108354	-0.0333894	0.0268936	0.0104325	0.341241	0.158826		0.382306	-0.036639	0.404372	0.215286	0.221282	0.135261		0.211965	0.0646619	0.370405	0.242405	0.249478	0.255866		0.274186	-0.141222	0.273645	0.132411	0.000911671	0.0934746		0.0581445	0.151312
A0A0A0MTS7	TTN	S1799	GTDHTSATLIVKDEKSLVEESQLPEGRKGLQ	Peptide693		-0.318704	-0.643823	0.185601	-0.352148	0.92542	-0.231479		-0.0425699	-0.956844	0.187063	-0.695811	0.415993	-0.482086		-0.188183	-0.391512	-0.372406	-0.382234	0.606121	-0.411917		-0.331607	-0.593493	-0.240148	-0.294997	0.891073	-0.326407		-0.24622	-0.348082	-0.583489	-0.464031	0.890463	-0.49089		-0.148475	0.0467384	-0.529013	-0.111936	0.989731	-0.429477		-0.176881	-0.2916
A0A0A0MTS7	TTN	S35137	KIKTTLAARILTKPRSMTVYEGESARFSCDT	Peptide694									0.204654	0.0295674	0.438433	0.32038	0.273436	0.60429									0.111493	0.119407	0.0187555	0.101174	0.10263	0.259139		0.115781	0.0723407	0.14613	-0.0112443	0.0643417	0.0706932		-0.0971901	-0.216778	-0.134378	0.0623255	-0.0622797	0.0369434		0.179399	0.176685
A0A0A0MTS7	TTN	S35145	RILTKPRSMTVYEGESARFSCDTDGEPVPTV	Peptide695		-0.146295	0.285013	0.00976322	-0.173262	-0.0880387	-0.0912955		0.0322881	0.00236705	-0.142694	-0.352344	-0.165435	-0.284486		0.348001	0.428439	0.00350587	0.245893	0.314793	0.255381		-0.0139474	0.0550369	-0.182089	-0.136521	-0.211682	-0.115612		-0.134356	0.0799379	-0.0496737	0.0821817	-0.245098	-0.135322		0.0194315	0.0371176	-0.169881	0.00519396	-0.573226	-0.0304908
A0A0A0MTS7	TTN	S17888	ERTKSTITLDWKEPRSNGGSPIQGYIIEKRR	Peptide696		-0.0131998	-0.63247	0.290028	0.459486	0.218517	0.299856		0.228242	-0.31842	0.357738	-0.0237776	0.166081	0.312884		-0.395771	-0.353802	0.0292718	-0.193456	0.0202799	-0.0333818		0.222155	-0.262736	0.309295	0.0920966	0.0957944	0.00960401		-0.0352204	-0.205497	0.22643	-0.15568	0.377717	0.320071		0.184689	-0.0532707	0.217556	0.31042	0.305765	0.151855		0.00356226	-0.172762
A0A0A0MTS7	TTN	S17892	STITLDWKEPRSNGGSPIQGYIIEKRRHDKP	Peptide697		-0.0889393	-1.51946	-0.178068	0.072864	-0.138475	0.204425		-0.425442	-1.27924	-0.334524	0.569884	0.0598428	0.888961									-0.869206	-1.18773	-0.456355	-0.478064	-0.232277	2.0296									-0.546295	-0.984577	-0.436675	-0.350536	0.0589144	1.20623		-0.676773	-0.621129
A0A0A0MTS7	TTN	S35243	VTSPPRVKSPEPRVKSPEAVKSPKRVKSPEP	Peptide698		1.05849	-0.300298	1.04871	1.01665	0.610806	0.731866		0.85414	0.323824	1.02939	0.643956	0.709679	0.737181		0.833258	0.18796	1.01454	0.573489	0.631952	0.606375		0.861436	0.202372	1.21407	0.620141	0.632681	0.569309		0.832212	0.310654	1.09039	0.664071	0.500263	0.739394		0.813356	0.266794	1.03273	0.641898	0.637082	0.710786		0.533973	0.557308
A0A0A0MTS7	TTN	S35249	VKSPEPRVKSPEAVKSPKRVKSPEPSHPKAV	Peptide699		0.929075	0.592025	0.442417	0.91089	0.56577	0.343011									1.17855	0.782583	1.13103	0.975062	0.758498	0.99339									0.52236	-0.0498599	0.358902	0.101269	-0.210362	-0.0275669									0.145649	0.422901
A0A0A0MTS7	TTN	S35255	RVKSPEAVKSPKRVKSPEPSHPKAVSPTETK	Peptide700		0.84307	-0.362401	0.837299	0.83855	0.384005	0.631386		0.625066	0.15503	0.797475	0.553297	0.492805	0.600601		0.636082	0.126835	0.722843	0.492308	0.531624	0.416035		0.632033	0.165561	0.850994	0.50172	0.492343	0.376033		0.656086	0.112742	0.826765	0.608389	0.21463	0.693998		0.686094	0.182705	0.780614	0.450901	0.454082	0.570829		0.335695	0.404695
A0A0A0MTS7	TTN	S35259	PEAVKSPKRVKSPEPSHPKAVSPTETKPTPT	Peptide701		0.565983	-0.957956	0.669891	0.784351	0.299361	0.548955		0.538506	-0.309593	0.753303	0.281109	0.571273	0.485278		0.429282	0.0107718	0.737968	0.314551	0.565711	0.320872		0.51224	-0.280062	0.822054	0.354162	0.367478	0.314352		0.902677	-1.23358	0.831168	0.733639	-0.718906	1.57347		0.382777	-0.312353	0.617643	0.200335	0.443601	0.286308		0.109945	-0.0762735
A0A0A0MTS7	TTN	S1413	PVSRIRSLSPRSVSRSPIRMSPARMSPARMS	Peptide702																0.152245	-0.0371855	0.0351651	0.06012	-0.358077	0.0581473		0.205323	-0.0816723	0.00922889	-0.0465423	-0.568381	-0.230717		0.247856	-0.350967	0.168042	0.156842	-0.586245	-0.35631									-0.034226	-0.271885
A0A0A0MTS7	TTN	S265	PHKTPPRIPPKPKSRSPTPPSIAAKAQLARQ	Peptide703		0.654897	-0.137273	0.621482	0.484998	0.210257	0.351082		0.570726	0.186006	0.614597	0.442159	0.313732	0.515275		0.506666	0.0781067	0.446113	0.459983	0.382011	0.301179		0.574136	0.116857	0.573797	0.538572	0.338407	0.343275		0.598214	0.107577	0.547885	0.528273	0.268612	0.38117		0.508137	-0.023171	0.424247	0.399948	0.428816	0.324713		0.439663	0.142832
A0A0A0MTS7	TTN	S263	QLPHKTPPRIPPKPKSRSPTPPSIAAKAQLA	Peptide704		0.476701	0.279088	0.309172	0.473519	0.160477	0.12573		0.29481	0.277539	0.161286	0.117166	-0.0342005	0.265003		0.565213	0.267753	0.211553	0.426117	0.198838	0.345827		0.45793	0.214093	0.0949093	0.445593	0.145438	0.228143		0.450261	-0.0388907	0.265217	0.41826	0.216971	0.124287		0.491401	0.0916144	0.208969	0.26857	0.386952	0.286674		0.436986	-0.0481493
A0A0A0MTS7	TTN	S19003	APPGPPFPKVTDWTKSSADLEWSPPLKDGGS	Peptide705																							0.0512808	-0.434027	0.128679	0.00032432	0.101081	0.0305778		-0.142939	-0.362667	0.210139	-0.243311	0.225846	0.0786678		-0.0472851	-0.33166	0.211091	0.0703201	0.280361	-0.0566063		-0.345075	-0.243716
A0A0A0MTS7	TTN	S19010	PKVTDWTKSSADLEWSPPLKDGGSKVTGYIV	Peptide706																							0.0744555	-0.355045	0.184348	0.060424	0.164652	0.237937		-0.0724232	-0.484453	0.28582	-0.178078	0.47742	-0.0881812		-0.025097	-0.377578	0.0857456	0.143598	0.626712	-0.0152781		-0.145783	-0.293617
A0A0A0MTS7	TTN	S22466	TPGPVVDLKVRSVSKSSCSIGWKKPHSDGGS	Peptide707																							-0.509457	-0.979137	-0.423677	-0.683167	-0.807437	-0.52432									-0.259545	-0.680916	-0.213167	-0.255527	0.144866	-0.256448
A0A0A0MTS7	TTN	S14094	REANVIWSKGPDIIKSSDKFDIIADGKKHIL	Peptide708																0.631645	-0.0129327	0.570384	0.393417	0.311041	0.468485		0.181414	-0.657716	0.507323	-0.263516	-0.29849	-0.368667		-0.401108	-0.489797	0.326306	-0.389041	0.34464	-0.108402		0.315931	-0.345082	0.585137	0.440078	0.668436	0.528856
A0A0A0MTS7	TTN	S23888	WQTVSKALVPGNIFKSSGLTDGIAYEFRVIA	Peptide709									0.0580119	-0.0474468	0.180267	-0.0192314	0.202581	0.044058		-0.1588	-0.197596	-0.0302503	-0.032833	-0.0846411	0.0208647		0.113285	-0.0795347	0.0345099	-0.0366532	-0.0486918	0.0690255		-0.0361477	-0.0918	0.154781	0.00701156	0.0568563	-0.000304162		0.0280006	-0.178032	-0.0432925	-0.00577643	-0.172639	-0.0743242		-0.102919	-0.0645169
A0A0A0MTS7	TTN	S23889	QTVSKALVPGNIFKSSGLTDGIAYEFRVIAE	Peptide710		-0.113234	-0.588753	0.19127	0.0863085	0.0450982	0.00309727									-0.106248	0.0727564	0.265612	0.135121	0.267712	0.243242																							-0.385487	-0.529904
A0A0A0MTS7	TTN	S32495	FGIGSYLQSEVIECRSSIRIPGPPETLQIFD	Peptide711		-0.364756	-0.632901	-0.276845	-0.213603	-0.0796598	-0.247091		0.594067	-0.441608	0.575094	0.153776	0.225919	0.396058																0.0313291	-0.114624	0.105493	-0.124292	0.161604	0.102811
A0A0A0MTS7	TTN	S32496	GIGSYLQSEVIECRSSIRIPGPPETLQIFDV	Peptide712																-0.231629	-0.215711	-0.213804	-0.237333	-0.00359441	-0.154188		-0.381511	-0.756031	-0.497983	-0.525746	-0.423245	-0.40693									-0.260813	-0.27393	-0.4244	-0.400652	0.433889	-0.39869
A0A0A0MTS7	TTN	S24338	KPGPPGNPRVLDTSRSSISIAWNKPIYDGGS	Peptide713																							-0.643052	-0.932676	-0.508492	-0.662769	-0.589897	-0.537775									-0.254588	-0.522866	-0.129224	-0.151202	0.0871759	-0.0992993
A0A0A0MTS7	TTN	S18287	PPGPPSCPEVKDKTKSSISLGWKPPAKDGGS	Peptide714																-0.293084	-0.43439	-0.0901157	-0.238048	0.0299262	-0.130459																-0.11267	-0.371099	-0.0995325	-0.151085	-0.0155148	-0.119874
A0A0A0MTS7	TTN	S29756	IRIADSTKSSITLGWSKPVYDGGSAVTGYVV	Peptide715									0.395645	0.27356	0.294243	-0.120605	-0.13468	0.203446		0.236483	-0.0118259	-0.22792	-0.0630584	0.122708	0.279674									0.124351	0.143352	0.13099	0.259459	-0.478578	0.166348
A0A0A0MTS7	TTN	S25427	PKVIDITRSSVFLSWSKPIYDGGCEIQGYIV	Peptide716																							0.196382	-0.230832	0.339727	0.162407	0.0132928	-0.0382591		-0.053533	-0.217006	0.43694	-0.0491055	-0.0106487	0.00740395									-0.0989791	-0.117104
A0A0A0MTS7	TTN	S27585	PPGPPSNPKVTDTSRSSVSLAWSKPIYDGGA	Peptide717																							-0.501697	-1.26599	-0.370117	-0.529536	-0.341595	-0.334096									-0.343246	-0.60274	-0.0396123	-0.176944	0.267706	-0.473325		-0.625537	-0.829867
A0A0A0MTS7	TTN	S27592	PKVTDTSRSSVSLAWSKPIYDGGAPVKGYVV	Peptide718		-0.00242927	-0.718583	0.445981	0.0437723	0.164663	-0.00631618		-0.0536759	-0.442339	0.31667	-0.0673769	0.00154685	0.0421772		-0.127256	0.0602233	0.257597	-0.038143	0.432326	0.213444																							-0.285285	0.0280498
A0A0A0MTS7	TTN	S28139	EYQFRVCAENRYGKSSYSESSAVVAEYPFSP	Peptide719																-0.345938	-0.273169	0.319596	0.0482503	0.329947	0.308413																							-0.461361	-0.494488
A0A0A0MTS7	TTN	S28144	VCAENRYGKSSYSESSAVVAEYPFSPPGPPG	Peptide720																0.171336	-0.0286134	0.283582	0.133367	0.168309	0.185044		0.0900978	-0.0453555	0.062539	0.0627766	-0.172363	-0.046272		-0.180268	-0.0985125	0.180078	0.0390574	0.048693	-0.0228085									-0.195095	0.0919729
A0A0A0MTS7	TTN	S25162	KGDQELSNTARLEIKSTDFATSLSVKDAVRV	Peptide721		0.0319508	-1.02184	0.478373	0.607958	0.159758	0.200601		-0.392293	-1.01401	0.031316	-0.324451	-0.220718	-0.296352		-0.304236	-0.185946	0.184943	-0.207642	0.173979	0.0443115																0.207076	-0.0880748	0.398199	0.229584	0.0444426	0.0726961		-0.41341	-0.424861
A0A0A0MTS7	TTN	S25168	SNTARLEIKSTDFATSLSVKDAVRVDSGNYI	Peptide722																0.240859	0.0952244	0.0447017	0.0713473	0.0723743	0.193266		0.0935603	-0.216726	0.153148	-0.301582	-0.284059	-0.266771		-0.255259	-0.148702	0.0720479	-0.265367	-0.260934	-0.174928
A0A0A0MTS7	TTN	S25170	TARLEIKSTDFATSLSVKDAVRVDSGNYILK	Peptide723		-0.132845	-0.978409	-0.314977	-0.222329	0.10513	0.169536																-0.451154	-1.07468	-0.459838	-0.547866	-0.631511	-0.493439									-0.291902	-0.737923	-0.00861051	-0.0685133	0.135108	-0.0487633
A0A0A0MTS7	TTN	S16539	RVLAENLAGPGKPSKSTEPILIKDPIDPPWP	Peptide724		0.163128	-0.933219	0.375251	0.297675	0.0937059	0.252213		0.0595028	-0.734763	0.294706	-0.0900849	0.14134	-0.182931		-0.260929	-0.122267	0.184445	0.0243535	0.415036	0.0904723		-0.0293299	-0.444035	0.265158	-0.0586219	-0.0226548	-0.288662									0.156743	-0.0975858	0.257969	-0.0661925	-0.154724	0.101796		-0.248213	-0.416811
A0A0A0MTS7	TTN	S21716	RNSLLWVKANDTLVRSTEYPCAGLVEGLEYS	Peptide725																0.0701807	-0.0852719	0.00588562	0.105624	0.0183814	0.215406
A0A0A0MTS7	TTN	S32561	WVRVNKVPVTMTRYRSTGLTEGLEYEHRVTA	Peptide726																																												-0.608685	-0.392782
A0A0A0MTS7	TTN	S28997	LEKGQKNWVKCAVAKSTHHVVSGLRENSEYF	Peptide727																0.145994	0.361098	-0.0476802	0.149784	0.151451	0.207465		-0.0823543	0.00731029	-0.207957	-0.197783	-0.281993	-0.302276		-0.136642	0.0209061	-0.124895	-0.0908175	-0.37778	-0.155496									-0.130086	0.019815
A0A0A0MTS7	TTN	S29003	NWVKCAVAKSTHHVVSGLRENSEYFFRVFAE	Peptide728		-0.117739	0.00414961	0.0146217	-0.1074	-0.0481052	-0.183143									0.0397302	0.168633	0.080768	0.0890978	0.129739	0.146434		-0.0533706	-0.249306	-0.114456	-0.0215179	-0.173032	-0.0984232		0.0367997	-0.0925399	-0.0868076	-0.167423	-0.074977	-0.0954401									0.0344541	-0.456243
A0A0A0MTS7	TTN	S28169	PPGPPGTPKVVHATKSTMLVTWQVPVNDGGS	Peptide729																							-0.458657	-0.936981	-0.245005	-0.438369	-0.407083	-0.362649									-0.255303	-0.573874	-0.387208	-0.323586	0.0446589	-0.25563
A0A0A0MTS7	TTN	S23547	APSPPDSLNIMDITKSTVSLAWPKPKHDGGS	Peptide730									0.0339011	-0.461034	-0.0191974	-0.153107	-0.0241513	-0.147598		0.0161613	-0.208534	0.0254812	-0.0940047	0.1506	-0.119648		-0.0362059	-0.432122	0.0383668	-0.0585452	-0.0294534	-0.19025									0.0878952	-0.200804	-0.0422637	-0.122004	-0.147025	-0.136667		-0.165766	-0.181793
A0A0A0MTS7	TTN	S31521	PVDAPGRPEVTDVTRSTVSLIWSAPAYDGGS	Peptide731																0.117679	0.0319533	-0.0515378	0.118163	0.203796	0.0861828
A0A0A0MTS7	TTN	S28440	TGQYVLTLKNVAGTRSVAVNCKVLDKPGPPA	Peptide732		-0.286615	-0.861047	-0.120138	-0.130403	-0.132758	-0.180324																-0.0899173	-0.5141	-0.000102462	-0.147693	-0.524902	-0.318358																-0.301203	-0.514458
A0A0A0MTS7	TTN	S2831	VSVSHDTVPVKWFHKSVEIKPSDKHRLVSER	Peptide733		0.314092	-0.907808	0.611236	0.457439	0.253813	0.342975		1.62448	1.03358	1.77395	1.26766	0.960487	1.3903									1.04452	0.595546	1.51485	0.850287	0.937308	0.595453		0.922043	0.499492	1.34912	0.758522	0.638146	0.789908									0.706814	0.586891
A0A0A0MTS7	TTN	S323	SPAARISTSPIRSVRSPLLMRKTQASTVATG	Peptide734		0.444165	0.0780687	0.269438	0.410661	-0.161854	0.106333		0.326097	-0.181596	0.111026	0.316868	-0.268099	0.261035		0.303534	0.0553035	0.259905	0.084821	-0.256061	0.163262		0.385416	-0.119323	0.256813	0.362149	-0.390027	0.250939		0.422431	-0.343755	0.371722	0.210909	0.0367084	0.0747117		0.495803	-0.163454	0.314971	0.381596	0.244522	0.0619391		0.368638	-0.234356
A0A0A0MTS7	TTN	S14541	RVKWFKNDQRLHTTRSVSMQDEGKTHSITFK	Peptide735		0.749828	0.159483	0.532147	0.771074	0.815134	0.28155									1.18384	0.689297	1.10007	0.869581	0.812043	0.618418		0.198224	0.153465	0.638727	0.319428	0.212771	0.394672		0.39512	0.26459	0.394589	0.198058	0.262515	0.837591									0.273862	0.702901
A0A0A0MTS7	TTN	S14543	KWFKNDQRLHTTRSVSMQDEGKTHSITFKDL	Peptide736		0.348115	-0.0728386	0.43535	0.228063	0.609431	-0.0108103		0.900016	0.690496	0.849053	1.20193	0.740852	1.56239		0.678817	0.365088	0.524504	0.358249	0.522175	0.250149		0.609434	0.584854	1.05952	0.71929	0.551212	0.676994		0.765709	0.659789	0.637564	0.671483	0.219939	1.17386									0.542275	0.966229
A0A0A0MTS7	TTN	S25194	SGNYILKAKNVAGERSVTVNVKVLDRPGPPE	Peptide737		0.00545493	-0.130973	0.411477	-0.0108215	0.217396	-0.0715049		0.582467	0.58728	0.774597	0.260641	0.1937	0.530443		0.256623	0.364303	0.0672881	0.040584	0.381694	0.204078		0.438766	0.39352	0.434251	0.392169	0.231632	0.104175		0.459883	0.441936	0.467899	0.456958	-0.0207719	0.246174									0.510596	0.343398
A0A0A0MTS7	TTN	S31062	RIHHYVVEKREASRRSWQVISEKCTRQIFKV	Peptide738																							-0.0488076	-0.358705	0.0396603	-0.174348	-0.227237	-0.244377		-0.271127	-0.342624	-0.00355983	-0.457739	-0.028636	-0.244164									-0.308978	-0.526039
A0A0A0MTS7	TTN	S22409	RDAERKSWSTVTTECSKTSFRVANLEEGKSY	Peptide739																-0.159119	-0.173833	-0.185665	-0.248544	-0.159036	-0.137038		-0.253488	-0.629403	-0.255371	-0.621911	-0.772302	-0.52122
A0A0A0MTS7	TTN	S1904	VRYDGIHYLDIVDCKSYDTGEVKVTAENPEG	Peptide740																0.0676046	0.0677242	0.482151	0.239367	0.389125	0.389978																							-0.526537	-0.228746
A0A0A0MTS7	TTN	S23481	RITNYIVEKREATRKSYSTATTKCHKCTYKV	Peptide741		-0.123075	0.0557987	0.519346	0.220656	0.275471	-0.144583									0.18141	0.546592	0.40754	0.459431	0.538646	0.509998		0.0422726	-0.174369	0.0284667	0.0189811	-0.191493	-0.281048		-0.155092	0.00929383	0.396211	-0.211983	-0.207268	-0.133702									-0.0973797	-0.124078
A0A0A0MTS7	TTN	S23483	TNYIVEKREATRKSYSTATTKCHKCTYKVTG	Peptide742		-0.217484	-0.91142	0.14736	0.115593	-0.28239	-0.183802																							-0.266598	-0.42015	0.264186	-0.624473	-0.140589	-0.135702									-0.557241	-0.309222
A0A0A0MTS7	TTN	S17569	KFSPPSDPKTAHDPISPPGPPIPRVTDTSST	Peptide743		-0.399511	-1.19255	-0.05083	-0.177361	-0.396318	-0.148184		-0.289401	-0.465056	0.128037	-0.0195278	-0.000465967	0.0779901																														-0.476594	-0.204322
A0A0A0MTS7	TTN	S813	TTERLVHVDKRPRTASPHFTVSKISVPKTEH	Peptide744		0.972478	0.331935	0.809632	1.00221	0.428705	0.527948		0.340943	-0.428832	-0.0224846	0.218474	0.139378	0.0817289		1.01211	0.292256	0.96067	0.849917	0.729528	0.601248		0.60456	-0.201422	0.639161	0.323986	0.290844	0.0195288		0.485729	-0.158418	0.714075	0.438738	0.212936	0.180211		0.744412	0.0457508	0.755431	0.982783	1.00068	0.560351		0.374604	-0.124419
A0A0A0MTS7	TTN	S30091	TWSHAGISKTCEIEVSQLKEQSVLEFRVFAK	Peptide745		0.428799	-1.05133	0.296959	0.617798	-0.122804	0.412708		0.266574	0.144103	0.659275	0.602953	0.184923	0.359272																0.275033	-0.325065	0.757874	0.109331	0.224085	0.361849		0.290084	-0.276435	0.435152	0.156989	0.234519	0.278313		-0.321138	0.333871
A0A0A0MTS7	TTN	S833	VSKISVPKTEHGYEASIAGSAIATLQKELSA	Peptide746		0.457657	0.0842774	0.469585	0.245324	0.157913	0.281045		0.303426	-0.0545862	0.635298	0.23204	-0.0663191	0.411601		0.177056	0.143269	0.288711	0.250668	0.134993	0.41979		0.384924	0.0369152	0.559871	0.147521	0.0801969	0.357334		0.236923	0.162424	0.232913	0.236836	0.292125	0.308851		0.254298	0.154975	0.43867	0.0596113	0.530886	0.188552		0.393403	0.359845
A0A0A0MTS7	TTN	S837	SVPKTEHGYEASIAGSAIATLQKELSATSSA	Peptide747																0.0706265	-0.287716	0.302346	0.112647	-0.182276	-0.0793374		0.260288	-0.344182	0.338982	-0.0467605	-0.261021	-0.200707		-0.22437	-0.421029	0.132365	-0.14047	0.371876	0.0416634		0.100371	-0.300514	0.548028	0.192522	0.982161	0.178153		0.0879359	-0.159394
A0A0A0MTS7	TTN	S2510	VKGTKQRLVINRTHASDEGPYKLIVGRVETN	Peptide748		0.437812	-0.154858	0.626902	0.305097	0.404259	0.152489									0.568897	0.480899	0.463045	0.442105	0.363896	0.495146		0.101793	0.0631367	0.187167	0.0490249	-0.0574486	-0.0900976		-0.0131918	0.127661	0.257138	-0.00902859	-0.0973412	0.21457									0.0386004	0.164622
A0A0A0MTS7	TTN	S15621	EPLSTKTIDTTAEQTSFRILEAKKGDKGRYK	Peptide749		-0.367923	-0.658916	-0.174162	-0.183866	-0.195464	-0.192412																-0.386782	-0.569634	-0.385672	-0.325195	-0.413715	-0.261974																-0.380983	-0.509504
A0A0A0MTS7	TTN	S214	VPAKKTKTIVSTAQISESRQTRIEKKIEAHF	Peptide750		-0.822189	0.00646868	-0.540118	-0.894445	0.829217	-0.543514		-0.0898785	0.260736	0.0070878	-0.595752	0.281421	-0.407684		-0.437277	0.127895	-0.64491	-0.566265	0.521495	-0.401257		-0.667611	0.0360884	-0.605717	-0.405238	0.716439	0.192648		-0.503457	-0.0506842	-0.627819	-0.68092	0.606317	0.34957									-0.328658	-0.0838945
A0A0A0MTS7	TTN	S216	AKKTKTIVSTAQISESRQTRIEKKIEAHFDA	Peptide751									-0.234306	0.215172	-0.389262	-0.246842	-0.0284141	-0.461568																							-0.544639	-0.239768	-0.643301	-0.488334	-0.388807	-0.388311
A0A0A0MTS7	TTN	S17423	KKDKTKPDSEWIVVTSTLRHCKYSVTKLIEG	Peptide752									-0.270586	-0.932655	-0.122665	0.035009	-0.000294123	-0.155635		-0.254699	-0.267099	0.175633	-0.0503488	0.232506	0.10346																0.0916298	-0.218018	0.198685	-0.0265064	-0.151354	0.0792394		-0.567691	-0.142584
A0A0A0MTS7	TTN	S27924	KWSTCTQVKTLEATISGLTAGEEYVFRVAAV	Peptide753									-0.000755353	-0.140338	0.0726361	-0.331201	0.0208273	-0.00464822		-0.194638	-0.214644	-0.408684	-0.115078	-0.0379608	-0.174898		-0.0908159	-0.128506	-0.184706	-0.0692708	-0.157531	-0.124663		-0.294515	-0.133936	-0.0655567	-0.095502	-0.0959283	-0.133566		-0.336015	-0.383812	-0.443925	-0.257026	-0.319554	-0.132561
A0A0A0MTS7	TTN	S16015	DKVLETGDRVKMKTLSAYAELVISPSERSDK	Peptide754																0.391554	0.0641291	0.227767	0.228994	0.185192	0.234173		-0.0496318	-0.139994	-0.036512	-0.176547	-0.180793	-0.24624		-0.332345	-0.229846	0.113438	-0.0537289	-0.0663564	-0.221484		0.0105695	-0.138064	-0.0653507	-0.061884	-0.0346267	0.0937966
A0A0A0MTS7	TTN	S16023	RVKMKTLSAYAELVISPSERSDKGIYTLKLE	Peptide755																0.427604	-0.0114484	0.229785	0.262319	0.0241393	0.422852		0.0367064	-0.193781	-0.039897	0.0206514	0.00287074	0.0513579		-0.0967382	-0.213759	0.0405987	0.0324228	-0.0726018	0.0787052		0.0602503	0.0665838	0.212526	0.0297031	0.332886	0.132711		0.0674566	-0.11074
A0A0A0MTS7	TTN	S16028	TLSAYAELVISPSERSDKGIYTLKLENRVKT	Peptide756																							-0.482847	-1.0221	-0.329021	-0.60103	-0.52049	-0.263263									-0.156158	-0.521083	-0.0263645	-0.13423	0.0115432	-0.298735
A0A0A0MTS7	TTN	S32901	EPVTPKTPLNPPEPPSNPPEVLDVTKSSVSL	Peptide757		0.11711	-0.270313	0.307291	0.345873	0.216323	0.223671		0.198855	-0.208181	0.469091	-0.0282902	0.148242	0.285529		0.159425	-0.0460361	0.249068	0.103611	0.265294	0.266458		0.204262	-0.225867	0.362593	0.140421	0.149591	0.186523		0.0626548	-0.0870946	0.432873	0.0955944	0.232799	0.17979		0.189543	-0.0763973	0.206859	0.161862	0.230102	0.154827		0.0771554	-0.0163419
A0A0A0MTS7	TTN	S35077	YAVSSFKKTSEMEASSSVREVKSQMTETRES	Peptide758																-0.371918	-0.371698	-0.0560669	-0.49352	-0.287366	-0.225983																-0.299446	-0.547976	-0.604806	-0.240245	0.341146	-0.164858
A0A0A0MTS7	TTN	S35078	AVSSFKKTSEMEASSSVREVKSQMTETRESL	Peptide759									0.695808	0.0352216	0.575117	0.238673	0.105468	-0.251919									-0.280552	-0.287169	0.269053	-0.183838	0.109909	0.0147995		-0.230092	-0.422646	0.321889	-0.484436	-0.0419027	0.0457125
A0A0A0MTS7	TTN	S35807	LPLVEEPSREVVLRTSGDTSLQGSFSSQSVQ	Peptide760																							-0.114271	-0.277385	0.0404311	-0.367496	-0.360749	-0.0214479		-0.593431	-0.361901	0.12264	-0.393363	-0.249399	0.0791219
A0A0A0MTS7	TTN	S35815	REVVLRTSGDTSLQGSFSSQSVQMSASKQEA	Peptide761																							0.0174709	-0.38122	0.516304	0.191378	0.271505	0.0284066		0.212992	-0.474204	0.666882	-0.289865	0.395082	-0.1475									0.0102451	-0.173932
A0A0A0MTS7	TTN	S35817	VVLRTSGDTSLQGSFSSQSVQMSASKQEASF	Peptide762		-0.324505	-0.450179	0.303017	0.348614	0.4951	0.278204									0.508241	-0.199425	0.344816	0.0460256	0.449271	0.24231		-0.223432	-0.6954	0.373912	-0.0903541	-0.112813	-0.427048		-0.167923	-0.533513	0.242695	-0.375176	0.399208	-0.314922									-0.0191272	-0.164945
A0A0A0MTS7	TTN	S35818	VLRTSGDTSLQGSFSSQSVQMSASKQEASFS	Peptide763		-0.519287	-0.466634	-0.260607	-0.16159	0.587446	0.0139063																																					-0.605355	-0.657465
A0A0A0MTS7	TTN	S35820	RTSGDTSLQGSFSSQSVQMSASKQEASFSSF	Peptide764		-0.476735	-1.28417	0.751212	0.0349636	0.0612179	0.328444		-0.140976	-0.84419	-0.019245	-0.287217	-0.350471	-0.528437		0.492432	-0.113156	0.248378	-0.0991814	0.281398	0.0839291
A0A0A0MTS7	TTN	S35824	DTSLQGSFSSQSVQMSASKQEASFSSFSSSS	Peptide765		-0.854542	-0.989301	-0.1647	-0.166533	0.573987	0.185953		0.488133	-0.188503	0.472591	-0.271213	0.17463	-0.750279		-0.379419	-0.115181	-0.654219	-0.759466	0.406379	-0.41233		-0.212775	-0.587629	0.217033	-0.240145	0.0938537	-0.117743
A0A0A0MTS7	TTN	S32622	PRVTDTTRTSVSLAWSVPEDEGGSKVTGYLI	Peptide766																-0.0304326	-0.230377	0.40835	0.167569	0.308878	0.214095																0.212006	-0.288957	0.467394	0.103404	-0.0543792	0.187538		-0.799078	-0.452181
A0A0A0MTS7	TTN	S29798	TVSTKGEVRTTEYVVSNLKPGVNYYFRVSAV	Peptide767		0.242583	-0.317534	0.398311	0.358784	0.299441	0.40537		0.279511	-0.048942	0.487893	0.0566137	0.21643	0.21213		0.298567	0.0296936	0.353431	0.253792	0.348827	0.271051		0.28621	-0.057029	0.37353	0.269033	0.194687	0.122081		0.207349	-0.0131059	0.372605	0.223394	0.244893	0.273044		0.312441	0.00181431	0.326717	0.221601	0.0724586	0.305434		0.139295	0.0829095
A0A0A0MTS7	TTN	S14191	KNDAKLHTSRTVLISSEGKTHKLEMKEVTLD	Peptide768									0.467782	0.340436	0.556406	0.226395	0.341202	0.462585		0.322564	-0.145444	0.312344	0.118433	0.170268	0.258552		0.458651	0.126968	0.476394	0.321001	0.264197	0.215928		0.20988	0.1582	0.516182	0.298042	0.0896796	0.440455		0.198558	-0.173209	0.252124	0.0851823	-0.0406726	0.0904437		0.219011	0.0666861
A0A0A0MTS7	TTN	S28021	TTRVNVSSSKTVTSLSIKEASKEDVGTYELC	Peptide769																														-0.258284	-0.857926	0.151821	-0.65653	0.177181	0.124982		-0.0392695	-0.38422	0.353499	0.178322	0.241568	0.083139		-0.53697	-0.420929
A0A0A0MTS7	TTN	S18837	IEKREANRKTWVHVSSEPKECTYTIPKLLEG	Peptide770									-0.0710701	-0.152404	-0.173972	-0.27692	-0.0833867	-0.227237		0.082803	-0.0257808	-0.287815	-0.134494	-0.055284	-0.0718259		-0.204516	-0.268766	-0.358058	-0.00468837	-0.058956	0.00471432									-0.0949032	-0.243385	-0.298906	-0.299527	-0.403487	-0.140931
A0A0A0MTS7	TTN	S1248	TVVVRTYVEDQEFHISSFEERLIKEIEYRII	Peptide771									-0.165901	-0.172658	-0.190277	-0.0634761	-0.0562251	0.0908803																-0.2032	-0.405577	-0.221959	-0.0142987	-0.404234	-0.105106
A0A0A0MTS7	TTN	S1249	VVVRTYVEDQEFHISSFEERLIKEIEYRIIK	Peptide772		-0.116207	-0.316985	0.150932	-0.0473519	0.275884	0.00324706		-0.142665	-0.0382777	0.121203	0.143618	-0.00792945	0.292821		0.481979	-0.0483179	0.101862	0.316214	0.433974	0.094539									0.267219	-0.280355	-0.161359	0.608035	-0.37846	0.241134									-0.142464	0.10515
A0A0A0MTS7	TTN	S16440	VAAENMYGVGEPVQASPITAKYQFDPPGPPT	Peptide773		0.052597	-0.212858	0.321493	0.285834	0.334128	0.207781		0.309155	-0.131127	0.415608	0.311602	0.230902	0.572668		0.161161	0.0808414	0.229784	0.172079	0.287906	0.242243		0.246065	0.0246586	0.426041	0.225923	0.190986	0.241479		0.152482	0.0215898	0.378717	0.377123	0.199553	0.253898		0.18577	0.0321277	0.209959	0.0945771	0.116627	0.174145		0.197402	0.158067
A0A0A0MTS7	TTN	S15869	ADPIERPSPPVNLTSSDQTQSSVQLKWEPPL	Peptide774		0.19096	-1.50652	0.168971	0.808324	0.120908	0.598061		-0.0433156	-0.482326	0.238115	0.458131	0.244362	0.346964									-0.19138	-0.487297	0.181831	0.0251792	0.237366	0.143522		0.140395	-0.43387	0.124114	-0.303759	0.446189	0.311835		0.181802	-0.121693	0.464724	0.377675	0.46234	0.140675		-0.673196	-0.420814
A0A0A0MTS7	TTN	S15874	RPSPPVNLTSSDQTQSSVQLKWEPPLKDGGS	Peptide775		0.593721	-0.965757	0.392525	0.761239	-0.00136943	0.717375		0.0570186	-0.250245	0.152546	0.713956	0.283889	0.44316																0.434696	-0.233689	0.460683	0.0379102	0.0806031	0.510284		0.438673	0.311668	0.673945	0.321176	-0.1139	0.4999		-0.572311	0.0525791
A0A0A0MTS7	TTN	S34132	IRSQKGVSVAKVKVASIEIGPVSGQIMHAVG	Peptide776		0.170498	-0.0622968	0.0046203	0.131273	0.158841	0.380288		-0.0624586	-0.427845	-0.0635656	-0.0222019	-0.131123	-0.0912822		0.353945	-0.0885974	0.428805	0.454767	0.514085	0.153224		-0.0227502	-0.5617	0.312905	0.0911222	-0.046061	0.0116302									0.306588	-0.0752675	0.259835	0.0444574	-0.121658	0.047774		-0.132423	-0.355886
A0A0A0MTS7	TTN	S26844	IVAESKVC VVTGLSSGQEYQFRVKAYNEK	Peptide777		0.0192113	-0.324394	0.106945	0.213339	0.253845	0.30272		0.098498	-0.382316	0.378283	-0.123225	0.00711783	0.0650103		-0.0439989	-0.0700902	-0.012957	0.00466445	0.061521	-0.0431508		0.0900559	-0.193626	0.131892	-0.00912986	-0.0202812	0.0347653		-0.0385812	-0.111809	0.144772	-0.173057	0.310231	0.145058		0.110771	-0.00097154	0.19217	0.159444	0.255855	0.0858845		0.250194	-0.364402
A0A0A0MTS7	TTN	S26845	VAESKVC VVTGLSSGQEYQFRVKAYNEKG	Peptide778																-0.249021	-0.224107	-0.331678	-0.294595	-0.245272	-0.12467		-0.288855	-0.572364	-0.405888	-0.487999	-0.631377	-0.499107
A0A0A0MTS7	TTN	S29069	VYVRAGSNLKVDIPISGKPLPKVTLSRDGVP	Peptide779									-0.0786507	-0.59154	0.338348	-0.0614327	-0.0989577	0.24992		-0.543321	-0.471164	-0.200083	-0.381395	-0.0836774	-0.172708																							-0.435522	-0.360445
A0A0A0MTS7	TTN	S24588	CHKTSWKVDQLQEGCSYYFRVLAENEYGIGL	Peptide780		-0.151376	-0.0437112	0.0636951	-0.0396039	-0.0574225	0.14937		-0.0339828	-0.157259	0.332347	-0.212778	0.0146826	-0.0987855		0.0768616	-0.115579	-0.0906083	-0.0837419	-0.10559	-0.0145378		0.207611	-0.11588	0.203107	-0.0668499	-0.171213	-0.00919183		-0.217246	-0.0578695	0.0422397	-0.0935017	0.201114	-0.00127408		0.00253326	-0.203235	0.00392933	0.00861214	0.177766	-0.00371089
A0A0A0MTS7	TTN	S2529	PYKLIVGRVETNCNLSVEKIKIIRGLRDLTC	Peptide781		-0.385588	-1.42954	0.0343835	0.0259655	-0.177225	0.0531067		-0.127253	-0.62248	0.451809	0.00619303	-0.122206	0.132606																														-0.482602	-0.303434
A0A0A0MTS7	TTN	S28739	RVKSVNKVGASDPSDSSDPQIAKEREEEPLF	Peptide782		0.297323	-0.140895	0.729513	0.341902	0.479693	0.179164									0.698585	0.557846	0.73533	0.702295	0.689852	0.689182		0.145431	0.0116507	0.458297	0.249588	0.0375477	0.0671606		0.250676	0.0595577	0.571974	0.178839	0.0256385	0.194332									0.105701	0.15532
A0A0A0MTS7	TTN	S28740	VKSVNKVGASDPSDSSDPQIAKEREEEPLFD	Peptide783		0.210748	0.0797484	0.454856	-0.14274	0.315659	-0.0341128									0.921419	0.499471	0.389612	0.655151	0.444233	0.643341		0.073944	0.00731915	0.219922	-0.0526897	-0.295296	-0.177079		-0.116564	-0.123264	0.43046	0.0546496	-0.298701	-0.030604
A0A0A0MTS7	TTN	S26576	IRVCALNKVGLGEATSVPGTVKPEDKLEAPE	Peptide784		0.860001	-0.467809	0.90669	0.879754	0.471252	0.707663		0.461555	-0.214126	0.836204	0.270055	0.447812	0.48595		0.487479	-0.0333264	0.775439	0.429775	0.624943	0.472959		0.582927	-0.326238	1.10793	0.354382	0.478413	0.266905		0.420746	-0.129097	0.880555	0.416139	0.479545	0.55549		0.660754	-0.0260568	1.11734	0.520674	0.561056	0.685384		0.283978	0.123321
A0A0A0MTS7	TTN	S15124	TDGKVKVHELAAEFISKPQNLEILEGEKAEF	Peptide785		0.464355	-0.534331	0.763133	0.577083	0.558461	0.518403		0.280333	-0.081232	0.754295	0.0620333	0.327408	0.212159		0.414904	0.0296271	0.679718	0.338797	0.493335	0.412598		0.509102	-0.339874	0.812937	0.222696	0.251966	0.241967		0.283219	-0.0460306	0.611451	0.269308	0.383923	0.3785		0.380941	0.104991	0.720804	0.317036	0.307382	0.383584		0.168968	0.0981072
A0A0A0MTS7	TTN	S32795	KCGKKAVYIKVRVIGSPNSPEGPLEYDDIQV	Peptide786		-0.210985	-0.600311	-0.0446533	0.0563562	-0.0930651	-0.00756337																							-0.568708	-0.619204	-0.272721	-0.598716	-0.000697314	-0.198167		-0.0529385	-0.369038	-0.00707123	-0.0857768	-0.0260337	-0.0738809		-0.752718	-0.483246
A0A0A0MTS7	TTN	S32798	KKAVYIKVRVIGSPNSPEGPLEYDDIQVRSV	Peptide787		-0.197233	0.09185	0.0920856	0.0637949	0.0965921	0.102805		-0.213397	-0.0140674	0.10105	-0.175415	-0.0865919	-0.0362219		-0.132865	-0.0671848	0.0723038	0.155265	0.211762	0.163591		-0.103084	-0.131072	-0.00317823	0.0348738	0.0112888	0.0421499		-0.13192	-0.070671	0.101683	-0.0376112	0.0778758	0.00283124		0.0219973	-0.100614	0.0871422	0.0453943	0.10267	0.0843313		-0.113392	-0.116925
A0A0A0MTS7	TTN	S773	HVVPKAVKPRVIQAPSETHIKTTDQKGMHIS	Peptide788		-0.0853379	-0.0517184	-0.170767	-0.337673	0.653945	-0.16433		-0.101654	-0.00974859	0.250879	-0.338429	0.445996	-0.156917		-0.287299	-0.0099286	-0.144002	-0.171495	0.3284	-0.134053		-0.312456	0.0166921	-0.0849952	-0.272257	0.617662	0.18747		-0.415529	-0.119645	-0.209206	-0.463677	0.632403	0.545587		-0.176734	7.57772e-05	0.0398465	-0.471493	0.55374	-0.111767		-0.145272	0.217483
A0A0A0MTS7	TTN	S35236	ARVTEKAVTSPPRVKSPEPRVKSPEAVKSPK	Peptide789		0.65121	-0.118694	0.61064	0.607216	0.342422	0.448719		0.514124	0.138515	0.592741	0.386691	0.389938	0.412597		0.581236	0.17652	0.622557	0.391355	0.451069	0.332378		0.515471	0.174584	0.651268	0.379485	0.491305	0.111231		0.595822	-0.0814115	0.725301	0.529385	0.056657	0.611505		0.551081	0.217638	0.554947	0.372159	0.386581	0.39222		0.276534	0.346801
A0A0A0MTS7	TTN	S24610	AENEYGIGLPAETAESVKASERPLPPGKITL	Peptide790																-0.573665	-0.304144	0.0141011	-0.386723	0.219855	-0.0583168																							-0.680348	-0.500593
A0A0A0MTS7	TTN	S21962	ATIKLKVLDKPGPPASVKINKMYSDRAMLSW	Peptide791		0.508648	-0.814902	0.648874	0.689719	0.34367	0.521584		-0.328348	-0.828601	0.0852817	-0.108505	0.0173735	-0.164264		0.269384	-0.0861727	0.606617	0.285514	0.512642	0.371903		0.0500938	-0.688073	0.253784	-0.0177635	0.0148898	-0.0517458									0.4795	0.0224429	0.626225	0.195208	0.212051	0.289641		-0.129844	-0.267203
A0A0A0MTS7	TTN	S24137	RPGPPEGPLAVTEVTSEKCVLSWFPPLDDGG	Peptide792									-0.189888	-0.835713	0.236092	-0.0847289	-0.0255627	-0.0669654																							-0.417298	-0.830538	-0.288895	-0.352678	-0.23315	-0.272517
A0A0A0MTS7	TTN	S25215	KVLDRPGPPEGPVVISGVTAEKCTLAWKPPL	Peptide793									-0.361785	-0.532249	0.154878	-0.0258338	0.174435	-0.059877																														-0.900307	-0.293993
A0A0A0MTS7	TTN	S21271	AVFVNVRVLDTPGPVSDLKVSDVTKTSCHVS	Peptide794									0.50062	0.256758	0.639886	0.157029	0.335976	0.434693		0.143589	-0.185482	0.200959	0.0459928	0.0842769	0.118463		0.404723	0.075564	0.535341	0.286493	0.296048	0.122544		0.316337	0.0545531	0.494538	0.294921	0.253655	0.24556		0.232254	-0.127686	0.331164	0.128159	0.0815935	0.199583		0.17616	0.0157379
A0A0A0MTS7	TTN	S21276	VRVLDTPGPVSDLKVSDVTKTSCHVSWAPPE	Peptide795									0.169517	-0.75429	0.382883	-0.362849	0.130679	-0.18466		0.501852	-0.232294	0.406573	0.120107	0.413635	0.344794		0.168681	-0.690544	0.538388	-0.00907683	-0.110708	-0.21411									0.121185	-0.526935	0.132626	-0.320405	-0.218795	0.10179
A0A0A0MTS7	TTN	S32309	AVTVQDLRVLPTIDLSTMPQKTIHVPAGRPV	Peptide796									-0.409367	-0.834318	-0.320009	-0.442565	-0.109971	-0.262233		-0.753767	-0.363003	-0.0561962	-0.27662	0.101378	-0.120717																-0.0319854	-0.312132	0.0445796	-0.00941537	-0.353812	-0.190469		-0.347013	-0.569592
A0A0A0MTS7	TTN	S16904	VEMCPVGTEKWMRVNSRPIKDLKFKVEEGVV	Peptide797		0.360783	-0.460108	0.387882	0.298002	0.196463	-0.030011																0.248585	-0.0259111	0.635462	0.215149	0.254163	0.309601		0.186661	-0.139224	0.848736	-0.0879424	0.0907909	0.532237									0.00940964	0.0554147
A0A0A0MTS7	TTN	S30377	EKKERNSILWQKVNTSPISGREYRATGLVEG	Peptide798		0.146916	0.321961	0.327941	0.249696	0.299108	0.160084									0.569774	0.450238	0.610016	0.504801	0.395076	0.474554		0.0942831	0.0108541	0.102144	0.0767594	-0.0207702	-0.0922367		0.161057	0.0573474	0.253524	-0.0577989	-0.0653796	0.0480965									0.0208575	-0.00469169
A0A0A0MTS7	TTN	S30380	ERNSILWQKVNTSPISGREYRATGLVEGLDY	Peptide799		-0.42783	-0.0584203	-0.0649789	-0.0451827	0.188103	-0.0659668									-0.0740608	0.274768	-0.0962056	-0.154556	0.262829	-0.176361		-0.0181311	-0.11557	-0.096177	-0.134233	-0.143095	-0.239672		-0.167315	-0.0372956	0.0380241	-0.289061	-0.0600074	-0.176123									-0.0112264	0.0543352
A0A0A0MTS7	TTN	S25394	VSAE AGLSEPSPPSAYQKACDPIYKPGPP	Peptide800		0.0582914	-1.20785	0.198319	0.0619437	-0.449321	0.0163298																																					-0.742764	-0.0725078
A0A0A0MTS7	TTN	S22535	TFRVSAENENGEGTPSEITVVARDDVVAPDL	Peptide801		0.0867303	-0.356325	0.158083	0.153281	0.0486616	0.131157		-0.014436	-0.118558	0.196531	0.175937	-0.132802	0.214265		0.101816	0.130285	0.271822	0.235521	0.184082	0.236012									0.0838448	0.154278	0.126191	0.0568822	-0.234706	0.21445									-0.139889	-0.00599662
A0A0A0MTS7	TTN	S33381	VSAQNTFGISDPLEVSSVVIIKSPFEKPGAP	Peptide802																-0.134843	0.0403044	0.299384	0.315224	0.285122	0.367007		-0.125005	-0.431642	-0.0223698	-0.163059	-0.148649	-0.167347		-0.269964	-0.356343	0.101486	-0.181871	-0.00939328	0.0775937		0.151127	-0.0605064	0.347828	0.253086	-0.12052	0.175771		-0.274189	-0.326476
A0A0A0MTS7	TTN	S33382	SAQNTFGISDPLEVSSVVIIKSPFEKPGAPG	Peptide803									-0.334728	-0.453485	-0.0145974	0.137076	0.210897	0.0925225									-0.21358	-0.722801	-0.0582942	-0.144843	-0.095537	-0.140564									-0.123994	-0.555253	-0.147128	-0.199133	-0.572915	-0.115187		-0.551339	-0.608546
A0A0A0MTS7	TTN	S24285	IKCNKKTLTDLRYKVSGLTEGHEYEFRIMAE	Peptide804		0.112528	0.248663	0.169869	0.304669	0.312812	0.312331									0.53784	0.224192	0.288064	0.432327	0.378345	0.529246		-0.163026	-0.372845	0.0744745	-0.165802	-0.134304	-0.136113		-0.234662	-0.327946	0.142119	-0.241698	0.204203	-0.23419		0.332997	-0.0050492	0.262599	0.205605	0.179999	0.322769
A0A0A0MTS7	TTN	S31663	IWTKGDKELDLCEKVSLQYTGKRATAVIKFC	Peptide805		0.319604	-0.275421	0.4877	0.412941	0.286592	0.366329		0.267692	0.0558038	0.558288	0.117361	0.28205	0.341994		0.307281	-0.0388764	0.434098	0.28137	0.281923	0.344316		0.375517	-0.0998701	0.50955	0.230543	0.311	0.161379		0.213132	0.131868	0.461783	0.195443	0.367261	0.265979		0.360806	0.0646279	0.397786	0.370117	0.103593	0.262749		0.261538	0.116807
A0A0A0MTS7	TTN	S2475	TKAVLECKVSVPDVTSVKWYLNDEQIKPDDR	Peptide806																																												-0.624066	-0.830915
A0A0A0MTS7	TTN	S2444	IPALGLSTSGRVSVYSVDVITPLKDVNVIEG	Peptide807																0.161252	-0.0942769	-0.041639	-0.0804925	0.224164	0.117239		-0.177384	-0.867756	-0.247445	-0.475865	-0.483857	-0.665349									0.0987084	-0.266107	0.181829	0.0444049	0.158808	0.0601568
A0A0A0MTS7	TTN	S34444	EDTGYYRVTATNTAGSTSCQAHLQVERLRYK	Peptide808		-0.288205	-0.35691	0.0800645	0.189515	0.108547	0.197912		0.101206	-0.284435	0.372791	-0.250362	0.161373	0.199446		-0.439796	-0.387808	-0.0231421	-0.236234	-0.0295015	-0.100246		0.0601305	-0.237121	-0.0134078	0.112314	0.191052	0.0478169		0.115307	-0.324071	-0.101791	-0.222302	0.405354	0.21394		-0.224562	0.0106775	0.246526	0.165367	0.352818	-0.222446		0.0542796	-0.660636
A0A0A0MTS7	TTN	S31902	AGNSEPSEASNFISCREPSYTPGPPSAPR	Peptide809									-0.446362	-0.183134	-0.0138899	0.242392	-0.166055	0.095012																-0.197146	-0.157515	-0.183656	-0.126225	-0.472758	-0.0429538									-0.466846	-0.357104
A0A0A0MTS7	TTN	S21361	YGPGVPTDVPKPVLASDPLSEPDPPRKLEVT	Peptide810																							-0.543687	-0.631843	-0.119911	-0.30576	-0.650398	-0.387841
A0A0A0MTS7	TTN	S21365	VPTDVPKPVLASDPLSEPDPPRKLEVTEMTK	Peptide811																-0.161881	-0.151511	-0.0777356	-0.0326103	-0.0279266	0.0154669									-0.278715	-0.237551	-0.152073	-0.235003	-0.215187	-0.158643									-0.352334	-0.330343
A0A0A0MTS7	TTN	S18957	MTLGVSYKVTGLIEGSDYQFRVYAI AGVG	Peptide812																0.30105	-0.115774	0.170393	0.0244761	-0.227531	-0.00834705		0.0189494	0.00311979	0.175429	-0.104481	0.135907	0.0212977		0.144962	0.0838628	-0.00865625	0.0238659	0.00637597	0.118663		0.10929	0.00449291	0.296792	0.269374	0.128519	-0.164361		0.267662	0.21618
A0A0A0MTS7	TTN	S23208	PVSDLRCKVTGLQEGSTYEFRVSAENRAGIG	Peptide813		-0.28457	-0.492076	-0.232035	-0.291184	-0.200548	-0.140058		0.176318	-0.0143304	0.320428	0.32562	0.0867512	0.319837																-0.0124811	-0.0646997	0.273004	-0.136907	-0.0657088	0.121301									-0.0362992	0.0865735
A0A0A0MTS7	TTN	S23500	ATTKCHKCTYKVTGLSEGCEYFFRVMAENEY	Peptide814																0.385734	-0.118788	0.348025	0.190776	-0.0472442	0.234434		-0.0901423	-0.28289	-0.0355888	-0.256758	-0.191716	-0.0988133		-0.252241	-0.242765	0.201808	-0.299528	-0.0747024	-0.100612		0.219957	0.0668801	0.154629	0.196564	-0.0393276	0.141549		-0.242503	-0.113999
A0A0A0MTS7	TTN	S31872	VNKDYVVYDTRLKVTSLMEGCDYQFRVTAVN	Peptide815																														-0.262217	-0.43029	-0.0636662	-0.329488	-0.225096	0.0499408									-0.408898	-0.430389
A0A0A0MTS7	TTN	S23050	VTVLDVPGPPGPVEISNVSAEKATLTWTPPL	Peptide816		0.106677	-0.61151	0.290476	0.454655	0.360597	0.229507		0.179209	-0.394403	0.51349	-0.145137	0.323077	0.303665		-0.184696	-0.258238	0.149518	-0.104792	0.241818	-0.133901		0.210061	-0.399332	0.4105	0.119912	0.152455	0.0182268		0.0560358	-0.0751723	0.259325	0.020418	0.360919	0.0965636		0.205963	-0.0943054	0.387354	0.2507	0.283238	0.211947		0.121144	-0.128531
A0A0A0MTS7	TTN	S23053	LDVPGPPGPVEISNVSAEKATLTWTPPLEDG	Peptide817																0.229377	-0.0735923	0.652934	0.326898	0.509533	0.459904																0.272455	-0.146816	0.422547	0.140053	-0.0527531	0.235098		-0.620119	-0.337083
A0A0A0MTS7	TTN	S30408	LDYQFRVYAENSAGLSSPSDPSKFTLAVSPV	Peptide818									0.00336539	-0.495881	0.311818	-0.161402	-0.0845213	0.33266																														-0.508402	-0.444002
A0A0A0MTS7	TTN	S30409	DYQFRVYAENSAGLSSPSDPSKFTLAVSPVD	Peptide819		0.349653	-0.212307	0.545161	0.494062	0.38362	0.3978		0.332542	-0.208271	0.582482	0.0921783	0.248913	0.320101		0.285488	0.00631287	0.412112	0.304701	0.368746	0.357669		0.295745	-0.0856773	0.513147	0.252641	0.285696	0.242835		0.115311	-0.0520523	0.492024	0.228921	0.289458	0.472563		0.29961	0.0519417	0.406473	0.223656	0.640276	0.285991		0.153335	0.149981
A0A0A0MTS7	TTN	S27889	DVTRNTATIKWEKPESDGGSKITGYVVEMQT	Peptide820									0.147559	-0.503907	0.385532	-0.376604	0.0116832	-0.167467		-0.277821	-0.424503	-0.433742	-0.51501	-0.0128678	-0.178746		0.0575673	-0.646031	0.141633	-0.199194	-0.366452	-0.306141
A0A0A0MTS7	TTN	S17399	TSVLCKWEPPLDDGGSEIINYTLEKKDKTKP	Peptide821																-0.0843764	-0.357339	-0.0907924	-0.180678	-0.0191275	-0.142489		-0.524892	-0.978938	-0.423949	-0.478256	-0.197985	-0.36546									-0.0716994	-0.320781	-0.0526913	-0.0169638	-0.0464853	-0.0567686
A0A0A0MTS7	TTN	S20117	IRGVPVPTAKWTTDGSEIKTDEHYTVETDNF	Peptide822																																					-0.0732815	-0.495171	-0.119166	-0.218133	-0.0997176	0.00778038
A0A0A0MTS7	TTN	S34985	TAEVKWYHNGVELQESSKIHYTNTSGVLTLE	Peptide823																							-0.414606	-1.10556	-0.2888	-0.333706	-0.277569	-0.162942									-0.27965	-0.583889	-0.11621	-0.279701	0.0306497	-0.100868
A0A0A0MTS7	TTN	S19464	AKRSDSGKYCVVVENSTGSRKGFCQVNVVDR	Peptide824									0.336433	0.551911	0.352904	-0.0396113	-0.058243	0.328748		0.0390651	-0.0262035	-0.301972	-0.119053	-0.298176	0.0303152		0.0590576	0.446701	0.119869	-0.0187494	-0.162722	0.0246705		0.0647992	0.312322	0.13937	0.167263	-0.220978	0.0280509									0.111563	0.239788
A0A0A0MTS7	TTN	S19467	SDSGKYCVVVENSTGSRKGFCQVNVVDRPGP	Peptide825		-0.147512	-0.704166	-0.269678	-0.142332	-0.16977	-0.0896181																																					-0.66365	-0.403486
A0A0A0MTS7	TTN	S19314	NTVTLTWNPPKYDGGSEIINYVLESRLIGTE	Peptide826									0.0297421	0.0954616	0.279508	0.362843	0.0351295	0.360076																0.0405349	-0.0564179	0.112303	-0.0302441	-0.267885	-0.0296659									-0.376055	0.10995
A0A0A0MTS7	TTN	S29168	ESVTLKWEPPKYDGGSQVTNYILLKRETSTA	Peptide827									0.159586	-0.0110045	0.314922	0.176114	0.554351	0.392829		-0.626666	-0.438454	-0.246153	-0.323402	0.1067	-0.245499		0.146063	-0.363524	0.355258	0.387474	0.0651144	0.126085		-0.020239	-0.245627	0.18984	0.0416638	0.351612	0.160456		-0.132977	-0.42242	0.00270786	-0.021193	0.19167	-0.062876		-0.279745	-0.102015
A0A0A0MTS7	TTN	S24839	DSITLSWGPPKYDGGSSINNYIVEKRDTSTT	Peptide828									0.117956	-0.0814864	0.243863	0.125537	0.242574	0.21269		0.0702342	-0.125618	0.0795784	-0.0132961	0.195768	0.0659871		0.185129	-0.221521	0.239614	0.182119	0.0979838	0.075746		0.149668	-0.00646043	0.208506	-0.0401657	0.213245	-0.048068		0.00395101	-0.255474	0.0625623	-0.0127291	-0.0243432	0.0197945		-0.147218	0.0969221
A0A0A0MTS7	TTN	S24840	SITLSWGPPKYDGGSSINNYIVEKRDTSTTT	Peptide829		0.245035	-0.208811	0.367281	0.342627	0.279814	0.23177		0.120776	-0.131615	0.38129	0.0862771	0.160155	0.245247		0.245845	0.0202502	0.312036	0.240981	0.357561	0.209476		0.19574	-0.138139	0.303907	0.209846	0.211322	0.123145		0.155241	-0.0320899	0.359887	0.150228	0.247958	0.159547		0.268264	0.00776144	0.32959	0.240848	0.132875	0.202906		0.0300941	0.122195
A0A0A0MTS7	TTN	S29122	SVTADAGRYEITAANSSGTTKAFINIVVLDR	Peptide830		-0.201951	-1.41912	-0.0313991	-0.352261	-0.35608	-0.361336		-0.17258	-0.518118	0.122753	-0.0258069	-0.156803	-0.0067021
A0A0A0MTS7	TTN	S18873	RIMAQNKYGIGEPLDSEPETARNLFSVPGAP	Peptide831		-0.0392915	-0.262381	-0.105294	-0.0173098	0.138346	-0.0348874		0.647055	0.767332	0.609049	0.767429	0.454802	0.980432									0.382071	0.403922	0.608901	0.365758	0.360531	0.429224		0.294203	0.20773	0.665229	0.325028	0.220975	0.525571									0.397138	0.728298
A0A0A0MTS7	TTN	S29624	RAVNKYGIGEPLESDSVVAK FVTPGPPGI	Peptide832		-0.000432341	-0.987986	-0.00911449	0.229068	0.019234	0.113651		0.0468106	-0.335495	0.436813	0.435294	0.227897	0.441345																-0.0532414	-0.349131	0.413046	-0.0132506	0.0369648	0.229839		-0.0624041	-0.372196	-0.000811705	0.0990371	0.139057	-0.0734077		-0.344843	-0.149416
A0A0A0MTS7	TTN	S35658	VELTNSEEYRYGVSGSDQTLTIKQASHRDEG	Peptide833		0.123063	-1.22331	-0.108598	0.0531906	-0.188289	0.0539693																														-0.127208	-0.519049	-0.249602	-0.099969	0.136788	-0.081524
A0A0A0MTS7	TTN	S30313	RVRAENRYGVSQPLVSSIIVAKHQFRIPGPP	Peptide834																0.0725385	0.00311391	0.136936	0.173257	0.163848	0.102524									-0.479432	-0.494772	-0.154725	-0.288132	-0.26508	-0.306669		-0.287057	-0.337889	-0.217483	-0.084574	0.0787566	-0.0349276
A0A0A0MTS7	TTN	S30314	VRAENRYGVSQPLVSSIIVAKHQFRIPGPPG	Peptide835																-0.323133	-0.220436	-0.0167541	-0.0863962	0.0808805	-0.127124		-0.361828	-0.861486	-0.421014	-0.424358	-0.508188	-0.558853									-0.289074	-0.433241	-0.110118	-0.140302	0.122604	-0.212108
A0A0A0MTS7	TTN	S22339	VNKYDAGKYILTLENSCGKKEYTIVVKVLDT	Peptide836		0.085484	0.150005	0.235176	0.316229	0.187507	0.280667		0.443112	0.025262	0.774503	0.189941	0.117383	0.341459		0.528514	0.00215838	0.418829	0.240696	0.133868	0.277201		0.377564	0.131651	0.57097	0.222219	0.0810887	0.263947		0.254013	0.0453079	0.552799	0.292582	0.240043	0.273997		0.311128	-0.0612624	0.356638	0.105558	-0.0242978	0.313123		0.227202	0.111915
A0A0A0MTS7	TTN	S24504	VNRFDSGKYILTVENSSGSKSAFVNVRVLDT	Peptide837																-0.381259	-0.139151	-0.0558739	-0.169762	-0.0908074	-0.163059		-0.307846	-0.496742	-0.440657	-0.346298	-0.376453	-0.414361																-0.360879	-0.677558
A0A0A0MTS7	TTN	S24507	FDSGKYILTVENSSGSKSAFVNVRVLDTPGP	Peptide838		0.121921	-0.206929	0.208135	-0.263419	0.122896	-0.238142									0.483313	0.296546	0.160099	0.219527	0.214086	0.382328		-0.059482	-0.42843	-0.0543723	-0.324237	-0.578405	-0.485955
A0A0A0MTS7	TTN	S4756	YESDKCSIRSSKYISSLEILRTQVVDCGEYT	Peptide839																														-0.298204	-0.194467	-0.196057	-0.336295	-0.321104	-0.29452									-0.468583	0.0399158
A0A0A0MTS7	TTN	S35469	TKDGKAITQGGKYKLSEDKGGFFLEIHKTDT	Peptide840		0.0793338	-1.45071	0.296719	-0.475461	-0.336179	-0.395024		0.243688	-0.21137	0.631014	0.3237	0.198604	0.428974
A0A0A0MTS7	TTN	S1131	KKSGVPLTTGYRYKVSYNKQTGECKLVISMT	Peptide841		0.750668	-0.598501	0.924785	0.800871	0.485972	0.57537		0.629219	0.361179	1.00371	0.511749	0.559673	0.604178		0.316902	0.120541	0.740387	0.420381	0.458331	0.699276		0.615089	0.298689	0.942802	0.519273	0.467512	0.370446		0.576983	0.336856	0.807776	0.509621	0.566016	0.547335		0.526431	0.299059	0.681387	0.522783	0.332235	0.419315		0.393246	0.476999
A0A0A0MTS7	TTN	S27752	TRFDSGRYNLTLENNSGSKTAFVNVRVLDSP	Peptide842		0.159932	-0.685769	0.23969	-0.0121401	-0.182035	-0.011004																							-0.114533	-0.436465	0.346247	-0.0178188	-0.350686	-0.0326305
A0A0A0MTS7	TTN	S27754	FDSGRYNLTLENNSGSKTAFVNVRVLDSPSA	Peptide843		-0.315133	-1.58111	0.241904	0.036116	-0.0705773	-0.0544345		0.128182	-0.5529	0.644672	-0.0391909	0.0273138	0.219385									0.135788	-0.583383	0.313155	-0.0807823	-0.210923	-0.290607																-0.313038	-0.481253
A0A0A0MTS7	TTN	S33511	PHFKEELRNLNVRYQS TLVCKVTGHPKPI	Peptide844		0.134542	0.141406	0.114698	-0.0849014	0.160991	0.139786		0.499721	0.0185545	0.486926	-0.112821	-0.121318	0.152199		0.871751	0.0610623	0.107488	0.305202	0.0610062	0.178311		0.418611	0.246985	0.501368	0.0361801	-0.260822	-0.0226854		0.0962799	0.0724116	0.386882	0.226353	-0.0307308	0.0709466		0.196657	0.0326006	-0.116638	-0.116107	-0.125119	0.136903
A0A0A0MTS7	TTN	S29887	TWRKDEKNLGSDARYSIENTDSSSLLTIPQV	Peptide845																																												-0.811756	-0.582602
A0A0A0MTS7	TTN	S29893	KNLGSDARYSIENTDSSSLLTIPQVTRNDTG	Peptide846									-0.178566	-0.282407	-0.197351	-0.108384	-0.0832981	-0.152598									-0.314067	-0.464016	-0.313678	-0.083022	-0.114151	-0.106484									-0.33578	-0.754113	-0.230261	-0.308682	0.203484	-0.142493		-0.458375	-0.239667
A0A0A0MTS7	TTN	S34711	PSRSPPHFELSSLRYSSPQAHVKVEETRKDF	Peptide847		0.337461	-0.629153	0.144794	0.390835	-0.0205201	0.073897		0.325459	0.119212	0.32908	0.686152	0.356296	0.485799		-0.107932	-0.509888	-0.0023327	-0.194118	-0.207887	-0.39195		0.0136724	0.218526	-0.087316	0.419598	0.233172	0.48604		0.339623	0.0371131	0.492245	0.126868	0.0951802	0.190565		0.321275	-0.107357	0.17095	0.303427	0.0491026	0.129348		-0.101568	0.165485
A0A0A0MTS7	TTN	S34712	SRSPPHFELSSLRYSSPQAHVKVEETRKDFR	Peptide848		0.31843	-0.53468	0.147031	0.448173	0.0718011	0.133105		0.384414	0.115565	0.405052	0.563643	0.368661	0.455544		-0.113711	-0.448847	0.0284324	-0.169387	-0.160138	-0.36283		0.269867	-0.0425877	0.370066	0.253268	0.354844	0.185705		0.355877	-0.0503941	0.519693	0.144426	0.178881	0.235272		0.327962	-0.1291	0.272026	0.365282	0.135312	0.221101		-0.0628069	0.111289
A0A0A0MTS7	TTN	S2612	DDEGKYTFYAGENMTSGKLTVAGGAISKPLT	Peptide849									-0.0158687	-0.323707	0.293967	0.0206125	0.291929	0.147669									-0.142782	-0.463585	0.00929017	-0.033579	0.0690179	0.037524									-0.238727	-0.496817	-0.118623	-0.171923	0.121479	-0.120438		-0.427673	-0.35705
A0A0A0MTS7	TTN	S32091	NRYDAGKYTIEAENQSGKKSATVLVKVYDTP	Peptide850		0.128442	-0.434807	0.371716	0.0199132	0.208732	0.129397		0.533682	0.431301	0.851385	0.24035	0.397807	0.718536		0.110744	0.0329095	0.257634	0.22815	0.163055	0.522778		0.528379	-0.0098997	0.867929	0.262199	0.331776	0.204828		0.469389	0.0615712	0.796279	0.391602	0.0427987	0.435179									0.520645	-0.050125
A0A0A0MTS7	TTN	S25586	VNRYDSGKYTLTLENSSGTKSAFVTVRVLDT	Peptide851		0.304396	-0.53423	0.510722	0.793439	0.342886	0.504294									0.0992134	-0.367797	0.368993	-0.0259892	0.0571545	0.166234									-0.127845	-0.525639	-0.058892	-0.41313	0.395763	-0.0335597		0.480612	-0.0324753	0.634713	0.557067	0.577789	0.373354		-0.311393	-0.222199
A0A0A0MTS7	TTN	S25587	NRYDSGKYTLTLENSSGTKSAFVTVRVLDTP	Peptide852																-0.183589	-0.494118	0.0476727	-0.171391	-0.204277	-0.0761717																0.057364	-0.360425	0.210544	-0.0492207	-0.144972	-0.0568784
A0A0A0MTS7	TTN	S17749	ALRKDHGRYVITATNSCGSKFAAARVEVFDV	Peptide853									-0.251512	-0.994308	-0.0576882	-0.607095	-0.0380255	-0.78147																							-0.289235	-0.709865	-0.190718	-0.351681	-0.211714	-0.343408
A0A0A0MTS7	TTN	S17752	KDHGRYVITATNSCGSKFAAARVEVFDVPGP	Peptide854																-0.0803224	-0.242638	0.237943	-0.0826745	0.00160714	0.0189991																							-0.49181	-0.504865
A0A0A0MTS7	TTN	S33212	HPGYPLKEKYYGAVGSTLRLHVMYIGRPVPA	Peptide855									-0.0521008	-0.12138	0.0966106	-0.0398076	-0.0560072	0.00993811									-0.18905	-0.416086	-0.239154	-0.126533	-0.22981	-0.236558																-0.435915	-0.482828
M0R3F1	HNRNPUL1	S567	PPQPPPQQPPPPPSYSPARNPPGASTYNKNS	Peptide856																							-0.400774	-0.422325	-0.169971	-0.273556	-0.280641	-0.266104		-0.636887	-0.476219	-0.389796	-0.623552	0.0118621	-0.237004
M0R3F1	HNRNPUL1	S43	RGRGYFEHREDRRGRSPQPPAEEDEDDFDDT	Peptide857																0.34779	-0.0411887	0.0721098	0.226355	-0.0405682	0.0944644
A0A0A0MRA8	EPB41L3	S478	AAEVGTGQYATTKGISQTNLITTVTPEKKAE	Peptide858																-0.979235	-0.61473	-0.316999	-0.436683	-0.830084	-0.543225		-0.151277	-0.781222	-0.430134	-0.618492	-1.10151	-0.606196
A0A0A0MRA8	EPB41L3	S88	AAKQLEYQQLEDDKLSQKSSSSKLSRSPLKI	Peptide859		-0.0850795	-1.51045	0.243204	0.00483076	0.099454	-0.182672		1.1319	-0.422387	0.929288	-0.421406	0.941789	-0.404404		-0.606459	-0.579167	-0.163459	-0.416349	-0.339877	-0.287706									-0.0208862	-0.407158	0.220767	0.114604	0.465917	0.0672313
A0A0A0MRA8	EPB41L3	S448	SSSKRYTMSRSLDGASVNENHEIYMKDSMSA	Peptide860		0.0492893	-0.312137	0.27727	-0.157851	0.161349	-0.0304007		0.365049	0.122532	0.309979	0.192277	0.192554	0.153056		-0.521153	-0.191324	-0.128223	-0.0272661	-0.263717	0.0171191									0.167378	-0.365302	0.193526	0.153605	0.243863	0.249848									0.459065	-0.327683
A0A0A0MSC0	KCNQ5	S78	TRAATLGGGGGGLRESRRGKQGARMSLLGKP	Peptide861		0.106744	0.684505	0.326764	0.137684	0.0572842	-0.0549043									0.0829601	0.284927	-0.0629916	-0.0133668	-0.0378776	0.0873179		-0.135983	0.278231	-0.109155	0.0627818	0.044431	-0.0545314		-0.354021	-0.293573	-0.243389	-0.429771	1.26862	-0.311372									-0.388189	-0.0300467
A0A0A0MSC0	KCNQ5	S820	TLLSVCPMVPKDLGKSLSVQNLIRSTEELNI	Peptide862									0.348542	0.325464	0.113782	-0.215453	-0.449024	-0.282163																-0.540233	-0.157554	-0.394966	-0.456789	1.04067	-0.330988
A0A0A0MSC0	KCNQ5	S822	LSVCPMVPKDLGKSLSVQNLIRSTEELNIQL	Peptide863																-0.0302085	0.093472	-0.0800202	-0.0145333	-0.0324299	0.0644456		-0.179024	-0.0815034	-0.435406	-0.105441	-0.0305503	-0.0721094									0.298059	0.204201	0.419151	0.014173	1.3815	-0.0220856		-0.447578	-0.234344
A0A0A0MSC0	KCNQ5	S438	GQSIKSRQASVGDRRSPSTDITAEGSPTKVQ	Peptide864																																												0.0575299	-1.15081
G3V5X4	SYNE2	S6331	QTDSWRKRGESEEPSSPQSLCHLVAPGHERS	Peptide865		-0.440813	-1.10938	-0.518808	-0.653327	0.776621	-0.446346		-0.428505	-0.556083	-0.256449	-0.354138	0.21902	-0.0160634
H0YBF7	ASAP1	S949	PERKGVFPVSFVHILSD______________	Peptide866																																					-0.249924	-0.479402	-0.257845	-0.118184	0.234583	-0.245425		-0.102272	-0.798218
H0YBF7	ASAP1	S731	PKLPQKVALRKTDHLSLDKATIPPEIFQKSS	Peptide867									0.124109	-0.754851	0.471289	-0.41451	0.311127	-0.421837																														0.228935	-0.982871
H0YBF7	ASAP1	S862	LSPNVQSRDAIQKQASEDSNDLTPTLPETPV	Peptide868																														-0.0761265	-0.292303	-0.323995	-0.196082	0.246331	-0.227501									0.332962	-0.626389
A0A0A0MRF6	AKAP9	S3845	RHTTYRSRSDLDYIRSPLPFQNRYPGTPADF	Peptide869									-0.109096	-0.436117	-0.144908	-0.119521	-0.101145	-0.040129									-0.200669	-0.748026	-0.396045	-0.136756	-0.242724	0.0283415																-0.551175	-0.537598
A0A0A0MRF6	AKAP9	S1653	QEEIKRLNRQLAQRSSIDNENLVSERERVLL	Peptide870																																												-0.581662	-0.362826
A0A494C179	CHD1L	S506	IYYFPRSKSAVLHSQSSSSSSRQLVP_____	Peptide871																-0.611256	-0.191306	-0.451818	-0.131341	0.214706	-0.236189									-0.160844	-0.00176116	-0.764751	-0.452922	0.0631497	-0.263032									-0.273938	-0.492181
A0A494C179	CHD1L	S507	YYFPRSKSAVLHSQSSSSSSRQLVP______	Peptide872																-0.56868	-0.188417	-0.332465	-0.445501	0.192031	-0.347253		-0.0723075	-0.359859	-0.400314	-0.400987	0.49857	-0.108788		-0.127134	-0.249114	-0.559345	-0.390435	0.75809	-0.426361									-0.339055	-0.493768
A0A0A0MRI1	GPALPP1	S103	FFGPALPPGFKKQDDSPPRPIIGPALPPGFI	Peptide873									0.526119	0.147305	0.381854	0.104176	0.458456	0.146799		-0.0260884	-0.329711	0.0859376	-0.0444182	-0.105895	0.00810358		0.293472	0.0458626	0.437134	0.225027	0.25509	0.175528		0.171833	0.0128664	0.247317	0.189161	0.3714	0.122236		0.046266	0.0286529	0.121823	0.0196452	0.505377	0.0772342		0.297871	-0.0154218
H0Y7V8	CDC42BPA	S908	QNGSALKREFSGGSYSAKRQPMPSPSEGSLS	Peptide874																														-0.0806034	-0.360121	0.102398	-0.0324939	-0.0657058	0.0799189									0.25321	-0.395737
A0A0A0MRJ3	V1	S661	KSSGIPVKPVNGRKTSLDVSNSAEPGFLAPG	Peptide875		0.00968718	-0.665316	0.0104856	-0.04715	0.120057	0.0624712																							-0.231235	-0.352406	-0.148888	-0.326201	0.102856	0.0456841									-0.318656	-0.50621
A0A0A0MRJ3	V1	S821	VKPPSLANLDKVNSNSLDLPSSSDTTHASKV	Peptide876		-0.748007	-1.41076	-0.814358	-0.389284	-0.217709	-0.245444		-0.0832014	-1.11266	-0.0966788	-0.581229	-0.149177	-0.588297
C9JM61	TNNT2	S62	EEEEAKEAEDGPMEESKPKPRSFMPNLVPPK	Peptide877		0.153123	-0.238541	-0.385144	-0.123491	-0.374318	-0.0549845																																					-0.414615	-0.328171
A0A0A0MRL6	ABLIM1	S394	TSGYDDKQERQSLGESPRTLSPTPSAEGYQD	Peptide878																-0.0978184	-0.390608	0.115647	-0.0934533	0.109176	-0.570425		0.258057	-0.352235	0.109743	0.103604	-0.154439	-0.149398		-0.00215725	-0.465509	-0.38585	-0.0334238	0.601361	-0.17395									0.00379297	-0.425487
A0A0A0MRL6	ABLIM1	S554	GPPSFAVVGPDMKRRSSGREEDDEELLRRRQ	Peptide879		-0.270355	-0.218599	0.181612	0.017045	0.170664	0.0692104		0.297239	0.412577	0.397619	-0.0529779	0.423495	0.32428		-0.320596	0.0673645	-0.164654	-0.304766	0.540562	-0.505942		0.281363	0.210042	0.298979	0.0585726	0.329841	-0.092936		0.149069	0.131827	-0.11848	0.333922	0.388994	0.153566									0.378231	-9.2773e-06
A0A0A0MRL6	ABLIM1	S555	PPSFAVVGPDMKRRSSGREEDDEELLRRRQL	Peptide880		-0.180038	0.121418	0.199214	-0.00817087	0.274116	0.253287		0.0094111	-0.0860467	-0.0413996	-0.255105	0.319839	-0.0135309		-0.456088	0.02606	-0.243405	-0.300857	0.458324	-0.76709		0.213533	-0.215137	-0.135307	0.0625255	0.452364	-0.221302		0.0967875	-0.166437	-0.514542	0.136543	0.374558	0.00980035		-0.318445	0.313503	0.0172473	0.338804	1.60877	-0.620113		-0.161373	-0.104499
A0A0A0MRL6	ABLIM1	S294	STKTEEKLRLPNIRRSSSDFFYSKSLIRRTG	Peptide881									-0.503692	-0.838307	-0.895875	-0.869447	0.0851466	0.0956151																							-0.356845	-0.487042	-0.129777	0.464121	2.09238	-0.573237		-0.597165	-0.638406
A0A0A0MRL6	ABLIM1	S295	TKTEEKLRLPNIRRSSSDFFYSKSLIRRTGR	Peptide882		-0.351104	0.0604507	0.25099	0.17803	-0.0715388	0.465715		-0.258956	-0.520479	-1.03249	-1.10278	0.215447	0.134335		-0.0887338	-0.0299971	-0.875077	-0.292437	0.690717	-1.20183		0.173062	-0.627556	-0.117165	0.0897097	-0.307619	-0.556153		0.107119	-0.535109	-1.2705	0.104971	0.198374	-0.354512		-0.226416	-0.396955	-0.0171062	0.470802	1.95424	-0.419957		-0.202119	-0.587702
A0A0A0MRL6	ABLIM1	S296	KTEEKLRLPNIRRSSSDFFYSKSLIRRTGRS	Peptide883																							-0.295097	-0.642006	-0.4833	-0.647868	0.486398	-0.159613		-0.491606	-0.768916	-0.610081	-0.581216	0.823045	-0.563708
A0A0A0MRL6	ABLIM1	S441	SPVYSRHSYTPTTSRSPQHFHRPGNEPSSGR	Peptide884																-0.418298	-0.275412	-0.34435	-0.66363	0.224572	-1.4267									0.115107	-0.547064	-1.07132	-0.184954	0.865223	-0.927303									-0.100526	-0.819276
A0A0A0MRL6	ABLIM1	S311	SDFFYSKSLIRRTGRSPSLQPTRTSSESIYS	Peptide885																							-0.296537	-1.08429	-0.577409	-0.750715	-0.29385	-0.691209																-0.440513	-1.5898
A0A0A0MRL6	ABLIM1	S313	FFYSKSLIRRTGRSPSLQPTRTSSESIYSRP	Peptide886																							0.148982	-0.433407	-0.278227	-0.536525	0.0883331	-0.513751		0.0715216	-0.484509	-1.11641	0.0211881	0.236415	-0.519117									-0.178786	-0.331758
A0A0A0MRL6	ABLIM1	S420	EGYQDVRDRMIHRSTSQGSINSPVYSRHSYT	Peptide887		-0.564911	0.21299	-0.347867	-0.215315	0.619339	-0.272267									-0.335004	0.259736	-0.150934	-0.398891	0.988691	-0.346013		-0.219026	-0.0153539	-0.299378	-0.110392	0.704319	-0.282186		-0.133817	0.0930956	-0.327678	-0.228801	0.678925	-0.257877									0.100297	-0.208625
A0A0A0MRL6	ABLIM1	S423	QDVRDRMIHRSTSQGSINSPVYSRHSYTPTT	Peptide888		-0.553564	-0.673252	-0.552911	-0.419531	-0.056164	-0.25319																-0.364613	-0.381818	-0.507402	-0.313544	-0.37528	-0.443506																-0.354099	-0.657612
A0A0A0MRL6	ABLIM1	S426	RDRMIHRSTSQGSINSPVYSRHSYTPTTSRS	Peptide889																-0.357135	-0.764174	-0.469805	-0.295436	-0.589079	-0.517468		-0.0740305	-0.880091	0.0888179	-0.124999	-0.823	-0.112299		-0.0642746	-1.20726	-0.264929	-0.157252	0.0141581	-0.333302									-0.0712984	-0.847082
A0A0A0MRL6	ABLIM1	S623	SPINSASHIPSSKTASLPGYGRNGLHRPVST	Peptide890		0.305919	-1.01252	0.120432	0.389173	0.0908971	0.120296																							0.0417313	-0.869062	0.265906	-0.0715242	0.279349	0.203154									0.268848	-0.905582
A0A0A0MRL6	ABLIM1	S399	DKQERQSLGESPRTLSPTPSAEGYQDVRDRM	Peptide891		-0.0873617	0.345238	0.108476	0.195898	0.365865	0.396974		0.259744	-0.222156	-0.0252718	-0.424878	0.104651	0.0885641		-0.166328	0.152619	0.114155	-0.108843	0.388866	-0.46482		0.192836	-0.047519	0.0964136	0.0964595	-0.0123402	0.193207		0.0170494	-0.076713	-0.357649	-0.0380312	0.628829	0.0395101		0.0662693	0.0435838	0.244816	0.282384	1.05728	0.135588		0.102736	-0.0680358
A0A0A0MRL6	ABLIM1	S320	CLVNFNKNPRQPTRTSSESIYSRPGSSIPGS	Peptide892																																												-0.334069	-0.562419
A0A0A0MRL6	ABLIM1	S608	KESRERSSLLASRYDSPINSASHIPSSKTAS	Peptide893									0.381066	-1.23755	0.0271049	-0.231301	-0.708486	0.47532		-0.419112	-0.498764	-0.0580677	-0.519063	-0.142592	-0.258021																							-0.214332	-0.756152
A0A0A0MRM2	NRAP	S482	TAMKLVPLKDANYRQSIDKLKYSSVTDTPQI	Peptide894		0.185591	-0.777971	0.0354066	0.149495	0.29917	0.451048		0.157234	-0.907833	0.407798	0.481408	0.767555	0.148551									-0.143442	-0.100154	0.516936	-0.15585	0.585205	0.076256		0.208785	-0.242752	0.243893	-0.177815	0.370348	-0.256128		0.059571	0.00307227	-0.0657101	-0.260151	1.07264	-0.112436		-0.193978	0.0399902
A0A0A0MRM2	NRAP	S384	SEVEYKKDLESSRGHSINYCETPQFRNVSKI	Peptide895		-0.528118	0.102072	-0.392616	-0.640154	0.045172	-0.509731		0.081795	-0.0039928	0.224085	-0.14163	-0.127581	0.209444		-0.0767314	0.0274415	-0.277455	-0.120824	0.10366	-0.0198945		0.00331852	-0.0785094	0.0118161	-0.0171313	-0.139081	-0.033446		-0.338049	-0.101504	0.0940751	0.183571	-0.338288	0.0038387
A0A0A0MRM2	NRAP	S152	ALPDPEIVRMVEARKSLGEEYTEDYEQPRGK	Peptide896		-0.262612	-0.519638	0.0757257	-0.0735482	0.41449	0.0975418		-0.660122	-0.318302	-0.390259	-0.763393	0.177564	-0.619506		-0.573834	0.896287	-0.64777	-0.703299	0.447786	-0.980941		-0.701884	-0.242265	-0.479316	-0.156724	0.310602	-0.457629		-0.586809	-0.0690647	-0.617159	-0.498558	0.100395	-0.149546		-0.368703	-0.16455	-0.158439	-0.150954	1.28979	-0.411041		-0.526864	-0.348912
A0A0A0MRM2	NRAP	S1602	NEYKKDFAKSRSQFHSSTDQPGLLQAKRSQQ	Peptide897																-0.308477	-0.368078	-0.105205	-0.421802	0.0958398	-0.399169																							-0.392965	-0.492058
A0A0A0MRM2	NRAP	S1603	EYKKDFAKSRSQFHSSTDQPGLLQAKRSQQL	Peptide898		0.0517033	-0.0733831	0.182381	0.024235	0.614483	0.251127		-0.390177	-1.05963	-0.103435	-0.136282	0.534609	-0.165822		0.182425	0.0386516	0.18182	-0.104038	0.414528	0.0547978		-0.32986	-0.194017	0.177028	-0.323958	0.618586	-0.326617		-0.128374	-0.333374	0.0430531	-0.307388	0.394227	-0.347814		0.0647402	0.293226	-0.0437351	-0.125499	1.08813	-0.17205		-0.255398	-0.163972
A0A0A0MRM2	NRAP	S437	GVGMDRRTLHAMKVGSLASNVAYKADYKHDI	Peptide899		0.398858	-0.321685	0.340627	0.447098	0.153154	0.334116		0.0769923	-1.31477	0.642105	-0.340435	0.0742656	0.359245		0.168718	-0.1273	0.263427	-0.432302	0.131363	-0.297566		0.0795896	-0.34546	0.454872	-0.184506	-0.217034	0.0977029		0.0967211	-0.337706	0.177858	-0.277212	0.505574	-0.207797		0.281693	0.0248265	0.302561	0.093389	1.25827	-0.152901		0.038425	-0.232919
A0A0A0MRM9	NOLC1	S572	GTSALTAQNGKAAKNSEEEEEEKKKAAVVVS	Peptide900																0.660906	0.194743	0.929799	0.416634	0.616066	0.740747		0.825216	0.312734	1.09864	0.486243	0.468018	0.359028		0.587712	0.133717	0.877466	0.421808	0.627619	0.46612									0.523885	0.0288896
A0A0A0MRM9	NOLC1	S632	PNTFPKRKKGEKRASSPFRRVREEEIEVDSR	Peptide901																0.0110408	-0.0216503	0.00166264	0.0901637	-0.0017521	0.0973801		-0.0256637	0.15647	-0.268754	0.0304953	-0.0797815	0.0608444		-0.0742398	0.0205821	-0.132114	-0.123162	0.216182	-0.229805									0.0398274	-0.00137854
A0A0A0MRM9	NOLC1	S707	RGGSISVQVNSIKFDSE______________	Peptide902																																					-0.171795	-0.570483	-0.157116	-0.143238	0.0664309	-0.255844		-0.964437	-0.898741
A0A0A0MRM9	NOLC1	S547	DDSSEEEEEKLKGKGSPRPQAPKANGTSALT	Peptide903																-0.381348	-0.295449	-0.0860966	-0.240212	-0.0782287	-0.0255541																							-0.462033	-0.401746
A0A0A0MRN0	PRPF38B	S416	HSDSKDQSDKHDRRRSQSIEQESQEKQHKNK	Peptide904																0.264075	0.0818226	0.368388	0.284526	-0.0910521	0.249603		0.323528	0.266193	0.388084	0.281073	0.0785461	0.484446		0.253699	0.0734927	0.376947	0.124933	0.427455	0.0710021									0.484598	0.00589245
A0A0A0MRN0	PRPF38B	S418	DSKDQSDKHDRRRSQSIEQESQEKQHKNKDE	Peptide905																0.0180668	-0.787968	0.535407	0.080044	-0.0832726	-0.0123215		0.292752	-0.830063	0.49206	0.177406	-0.520674	-0.500069																-0.0815953	-0.867905
A0A0A0MRN0	PRPF38B	S423	SDKHDRRRSQSIEQESQEKQHKNKDETV___	Peptide906																														0.357331	-0.541502	0.693682	0.159489	0.481479	0.027287									0.184666	-0.318086
A0A0A0MRN5	OGFR	S263	LPHPLEGSRKVEEEGSPGDPDHEASTQGRTC	Peptide907																														-0.1565	-0.622466	-0.0241496	-0.120655	0.224765	-0.00882992									-0.435492	-0.0477712
A0A0A0MRN5	OGFR	S326	GDEAGGHGEDRPEPLSPKESKKRKLELSRRE	Peptide908		0.311415	-0.759555	0.0525568	-0.0542746	0.0850718	0.0198425																-0.190039	-0.601313	0.0218627	-0.16254	-0.0610342	0.249872																-0.254532	-0.68432
Q5T457	ANKRD2	S106	LRKKRKQKKRDALAASHEPPPEPEEITGPVD	Peptide909																							-0.605376	-0.729527	-0.324878	-0.429267	0.162956	-0.466685									-0.269199	-0.686739	-0.362902	-0.624883	0.952266	-0.593993
Q5T457	ANKRD2	S289	PEPGAEHNGLEGPNDSGRETPQPVPAQ____	Peptide910		0.830071	-0.241754	0.404299	0.132228	-0.461149	-0.188564		-0.204307	-0.923733	-0.0965304	-0.422099	-1.01406	-0.370595		0.73383	-1.12829	0.211469	-0.144969	-0.39396	-0.276893		-0.229111	-0.625888	0.245779	-0.0260211	-0.123328	-0.501152		-0.327072	-1.2793	-0.0973542	-0.272949	0.817329	-0.763048		0.274305	-0.652563	0.342527	-0.115123	1.16689	-0.246877		-0.181461	-0.684087
Q5T457	ANKRD2	S72	AALQKVKGQERVRKTSLDLRREIIDVGGIQN	Peptide911		1.14668	0.770674	0.651867	0.48244	0.0955805	-0.0673213		-0.0347603	-0.278698	-0.0216602	-0.398	-0.710622	-0.380296		1.30345	0.106889	0.35578	0.555259	0.444127	-0.0405956		0.0969212	-0.113921	0.199409	0.222704	0.520497	-0.619597		0.0662368	-0.354602	-0.0311123	0.186126	1.00231	-0.842752		0.592715	0.0450733	0.502577	0.318453	1.61832	-0.0206029		-0.224779	0.301349
A0A0A0MRP0	MAP7D3	S229	RKTDKERSSSLNRRDSNLHSSTDKEQAERKP	Peptide912																-0.127627	-0.303762	-0.757399	-0.617753	0.151701	-0.447068		0.0390832	-0.40165	0.0217186	-0.527771	-0.23016	-0.788312		-0.59471	-0.528164	-0.554735	-0.405917	0.426223	-0.253977
B6VEX4	ABI1	S222	PTVPNDYMTSPARLGSQHSPGRTASLNQRPR	Peptide913																-0.42085	-0.391346	-0.234026	-0.508828	0.106877	-0.370655		0.155001	-0.486433	0.0499699	-0.113452	0.171709	-0.227283		-0.00674353	-0.0226805	-0.173953	-0.0895661	0.13551	-0.111398									0.729669	-0.519243
B6VEX4	ABI1	S225	PNDYMTSPARLGSQHSPGRTASLNQRPRTHS	Peptide914																-0.372043	-0.488517	-0.148205	-0.137856	-0.332489	-0.234639		0.135541	-0.486672	-0.0223748	0.0716271	-0.312709	-0.0619196		-0.166053	-0.78	-0.0940154	-0.181006	0.396437	-0.176536									0.401587	-1.03663
B6VEX4	ABI1	S231	SPARLGSQHSPGRTASLNQRPRTHSGSSGGS	Peptide915																-0.182776	-0.182396	-0.208253	-0.0230509	0.0738686	-0.0155057		-0.00644997	-0.227685	-0.036466	0.215969	0.311653	0.0109598		0.325859	-0.15516	-0.136703	-0.0564642	0.0795287	0.0424859									0.720572	-0.388151
B6VEX4	ABI1	S183	TGTLSRTNPPTQKPPSPPMSGRGTLGRNTPY	Peptide916																-0.191625	-0.201099	0.290604	-0.0780077	-0.0636881	0.0423771		0.259384	-0.160566	0.458316	0.247746	0.100923	0.289072		0.244097	-0.216115	0.316885	-0.0734581	0.385937	0.138314									0.519406	-0.418931
A0A0A0MRW1	FAM219A	S69	VMARTRLVVPNKGYSSLDQSPDEKPLVALDT	Peptide917																-0.354646	-0.146031	-0.0455255	-0.0898835	0.250428	-0.239689									-0.154513	-0.330564	-0.391924	-0.301713	0.408866	-0.431336									-0.389185	-0.381795
Q5VW31	NFIB	S13	___MNSGVNLQRSLSSPPSSKRPKTISIDEN	Peptide918		-0.226926	-0.486174	-0.272429	-0.10998	0.803315	-0.150065																-0.637039	-0.0670296	-0.710122	-0.0981303	1.44329	0.00598335		-0.199462	0.201214	-0.0839193	-0.523809	0.339941	0.148447									0.174887	-0.420565
F8WDP1	TBC1D22A	S132	GPGLQQKPRPEAEPPSPPSGDLRLVKSVSES	Peptide919																																												-0.538116	-0.273054
F8WDP1	TBC1D22A	S171	ASDAAPLQRSQSLPHSATVTLGGTSDPSTLS	Peptide920		-0.459962	-0.677684	-0.236158	-0.116716	0.14642	0.053813		-0.314818	-0.225641	0.184884	0.0400694	0.117787	0.0656504																-0.302259	-0.296099	-0.266477	-0.708303	0.731638	0.0227384									-0.287957	-0.452722
J3KQJ8	SPATA13	S38	YKAVSARFRPFTFSQSTPIGLDRVGRRRQMR	Peptide921																							-0.344992	-0.3374	-0.226358	-0.221116	-0.493432	-0.229421		-0.473829	-0.552028	-0.161602	-0.458215	-0.439754	-0.128093
E7EW15	TNIP1	S213	LMSNGNKEGASGRPGSPKMEGTGKKAVAGQQ	Peptide922																0.430639	0.0215784	0.219278	0.0246013	-0.00104243	0.0487577									-0.157981	-0.541707	-0.17896	-0.337121	0.272041	-0.312224
A0A0A0MS29	MFF	S96	SE VRQNGQLVRNDSLVTPSPQQARVCPPH	Peptide923																-0.468418	-0.265033	0.0787155	-0.149707	-0.0215683	-0.22903		-0.224865	-0.257296	-0.121281	-0.145602	0.0317418	-0.0393492																0.088222	-0.685048
A0A0A0MS29	MFF	S79	QNEEIRAVGRLKRERSMSE VRQNGQLVRN	Peptide924																0.21519	0.28985	-0.0426401	-0.16088	0.532163	-0.245281		-0.0950418	0.169987	-0.253858	-0.250094	0.258924	-0.172214		-0.115604	0.200224	-0.0689884	-0.0323284	0.0713032	-0.130984									0.0925769	-0.0249099
A0A0A0MS29	MFF	S81	EEIRAVGRLKRERSMSE VRQNGQLVRNDS	Peptide925																-0.147778	-0.335882	-0.0269614	-0.0638294	-0.984207	0.34533
A0A0A0MS58	LRRC20	S22	LRELHLEGNFLHRLPSEVSALQHLKAIDLSR	Peptide926		-0.130085	0.0122381	0.0687541	-0.126469	-0.121875	0.0500789		0.175349	-0.242781	0.130636	-0.00945715	0.183408	-0.0177517		0.0197932	0.20259	0.185239	0.265706	0.340424	0.298902		-0.0492346	-0.237725	0.0625035	0.0990649	-0.0559269	0.054644		0.0807099	0.243885	0.110258	0.0129564	-0.347628	0.178514		0.0824374	-0.103704	0.0628171	0.09619	-0.761275	-0.0103146		0.0132498	-0.0383133
K7EPZ6	MBD1	S196	ARRRPGAQPLPPPPPSQSPEPTEPHPRALAP	Peptide927																																												-0.492287	-0.801914
K7EPZ6	MBD1	S198	RRPGAQPLPPPPPSQSPEPTEPHPRALAPSP	Peptide928																-0.542438	-0.306842	-0.246304	-0.0916009	0.0646037	0.0861228									-0.133458	-0.580127	-0.215702	-0.302641	0.129855	-0.115678									-0.292237	-0.320153
A0A0A0MS99	ABCC1	S614	SSSSSYSGDISRHHNSTAELQKAEAKKEETW	Peptide929																0.382143	-0.144352	0.343035	0.153182	-0.212523	0.00178305		0.123124	0.219978	0.329878	0.0226424	-0.15504	0.120717		0.125854	0.0150958	0.270929	0.0545324	0.0861476	-0.130115									0.158588	-0.00240076
A0A0A0MSA7	EIF4G3	S1445	HNFLLEQKLDFIESDSPCSSEALSKKELSAE	Peptide930																																					-0.234213	-0.596885	-0.17967	-0.258437	0.16045	-0.105106
A0A0A0MSA7	EIF4G3	S494	QTEEILDSQNLNSRRSPVPAQIAITVPKTWK	Peptide931									0.0291069	-0.580115	-0.244734	-0.0416903	-0.369186	-0.160203		0.0829509	-0.363722	-0.356341	-0.141058	-0.241586	-0.121524									-0.25035	-0.198801	-0.440093	0.0325435	-0.658135	-0.340505
A0A0A0MSA7	EIF4G3	S229	DQKQEEKPKPDPVLKSPSPVLRLVLSGEKKE	Peptide932																																												-0.489402	-0.447587
A0A0A0MSA7	EIF4G3	S231	KQEEKPKPDPVLKSPSPVLRLVLSGEKKEQE	Peptide933																-0.161162	-0.229668	-0.122176	-0.0149718	-0.186635	-0.271739		-0.191886	-0.548991	-0.231558	-0.188406	-0.321063	-0.229132		-0.131871	-0.528784	-0.406985	-0.354495	0.0877795	-0.436951									-0.187346	-0.663232
A0A0A0MSB8	EXOC7	S283	RPGTIRKAQNLLKQYSQHGLDGKKGGSNLIP	Peptide934		0.299311	-0.98045	0.19266	0.17794	-0.108565	0.00382821																																					-0.679057	-0.483932
A0A0A0MSB8	EXOC7	S250	KEHFHKSSSSSGVPYSPAIPNKRKDTPTKKP	Peptide935									0.955616	-0.589768	0.572287	0.356726	-0.526969	0.270918		0.340984	-0.478464	0.0398155	0.21072	-0.702016	0.186156		0.548461	-0.131905	0.552146	-0.0251742	-0.373676	0.289594		0.0460746	-0.560117	0.211649	0.255341	0.121682	-0.057033
A0A1W2PQV5	HADH	S13	___MAFVTRQFMRSVSSSSTASASAKKIIVK	Peptide936									-0.642465	-0.322676	-0.949978	-0.6243	0.391618	-0.35538																							-0.618219	-0.617747	-1.21485	-0.51784	0.372562	-0.413895
D3DNG8	AGTR1	S366	LLKYIPPKAKSHSNLSTKMSTLSYRPSDNVS	Peptide937																														-0.188797	-0.628619	0.0269755	-0.36512	0.106875	-0.0225063									-0.0393011	-0.653916
A0A0A0MSG0	WIPF3	S383	AGGGKLNPPPAPPARSPTTELSSKSQQATAW	Peptide938																-0.0913979	-0.189093	0.0970883	-0.0732125	-0.165651	0.430631																							-0.135624	-1.16265
A0A0A0MSG0	WIPF3	S149	RLPNKTISGPLIPPASPRLGNTSEAHGAART	Peptide939		0.446246	0.160338	0.365286	0.351067	-0.00883413	0.523836		0.173783	-0.283734	0.35654	0.162627	-0.119837	0.224297		0.0404405	-0.0716387	0.301016	0.0350312	0.101583	0.0145677		0.18254	0.0703663	0.265542	0.227305	0.103784	0.234276		0.104336	-0.152392	0.0181147	-0.0329702	0.70697	0.12845		0.294764	0.201192	0.578752	0.168894	0.780165	0.171504		-0.0263384	0.147291
A0A0A0MSI0	PRDX1	S30	FKATAVMPDGQFKDISLSDYKGKYVVFFFYP	Peptide940		0.623659	-0.13046	0.682512	0.517616	0.424642	0.443946		0.616571	-0.0610328	0.70531	0.190264	0.361838	0.366827		0.782178	0.241481	0.715677	0.51717	0.51377	0.397655		0.602148	0.0499922	0.761648	0.273723	0.298133	0.173624		0.505689	0.180926	0.738396	0.390398	0.303905	0.245081		0.625649	0.0738703	0.671435	0.372466	0.13691	0.348883		0.373415	0.303409
A0A0A0MSI0	PRDX1	S32	ATAVMPDGQFKDISLSDYKGKYVVFFFYPLD	Peptide941		0.477546	-0.131489	0.563469	0.253614	0.263655	0.282494		0.49756	-0.204012	0.540051	0.0998468	0.217369	0.215924		0.723957	0.2744	0.514617	0.506424	0.417548	0.390822		0.380278	0.107127	0.55303	0.171804	0.109729	0.110551		0.274499	0.117563	0.528954	0.320041	0.263429	0.0716832		0.474538	0.00938716	0.331114	0.203192	-0.0759055	0.261581
D6R9B0	CDK18	S141	SPDLPKPLSRMSRRASLSDIGFGKLETYVKL	Peptide942																							-0.2024	-0.60001	-0.284931	-0.0491867	-0.0232407	-0.261338									-0.111687	-0.162372	0.255478	-0.264781	0.30415	-0.436665		-0.0537142	-0.897698
H0YK04	ARHGAP5	S96	PVETWKGGIDNPAITSDQELDDKKMKKKTHK	Peptide943									0.178261	-0.603866	0.709887	0.149344	0.271462	0.204716																														-0.11782	-1.14804
A2ABK4	NELFE	S115	EKGPVPTFQPFQRSISADDDLQESSRRPQRK	Peptide944		-0.0494078	0.551884	-0.189273	-0.0842971	0.589933	-0.011072		0.0508868	0.297044	0.383367	0.047861	0.49436	0.202602		-0.308028	0.191783	-0.289938	-0.29746	0.443563	-0.196188		0.0218131	0.548087	-0.25825	0.175579	0.739441	0.284336		-0.0240647	0.373425	-0.268667	-0.077366	0.809432	0.178686		-0.0236275	0.51366	-0.0620235	-0.00988835	0.936645	-0.13386		0.131961	0.0940649
A0A0A0MSQ2	RFX5	S185	VSMPPLPGLDLKGSESPEMGPEVTPAPRDEL	Peptide945																-0.0363687	0.0847041	0.0322588	-0.0482202	-0.060044	0.264471									-0.120973	-0.302065	0.0834803	-0.180874	0.0502224	-0.01367									-0.0121808	-0.255864
A0A0A0MSQ9	MON1A	S39	GTLTPSDGQSMERAESPTPGMAQGMEPGAGQ	Peptide946		-0.581762	-0.0591262	-0.169787	-0.403894	-0.152421	-0.206686		0.386857	0.0235532	0.411395	0.0340419	-0.173147	0.0253366		-0.178245	-0.117539	-0.355597	-0.137592	-0.25516	-0.216646		0.049477	-0.0389641	0.0760326	0.113721	-0.146735	-0.065773		0.0516276	0.100481	-0.240019	-0.0851801	-0.0174965	0.126948									0.209303	-0.394015
A0A0A0MSQ9	MON1A	S64	EPGAGQEGAMFVHARSYEDLTESEDGAASGD	Peptide947		0.236997	0.11676	0.500752	0.273543	0.228356	0.0896729									0.440395	0.218873	0.367936	0.421506	0.256224	0.322208		0.179261	0.24942	0.279722	0.202111	0.125613	0.118065		0.221056	0.161267	0.159406	0.176564	-0.011396	0.215664									0.230318	0.0520896
A0A0A0MSU2	ELMSAN1	S461	LRGGVIQSTRRRRRASQEANLLTLAQKAVEL	Peptide948									-0.187889	-0.569734	-0.222057	-0.346415	0.175695	-0.375662																							-0.435252	-0.353485	-0.660973	-0.312193	0.358154	-0.312722
Q5TCC6	IARS	S100	FIFTTIKAPLKPYPVSPSDKVLIQEKTQLKG	Peptide949																														-0.410796	-0.389442	0.144734	-0.432221	0.546213	0.42637		0.00540405	0.0167862	0.0140372	-0.0630466	1.21638	0.103743		-0.270317	-0.0612384
A0A0A0MSY4	DOCK9	S926	RSYVKYAYKAEPYVASEYKTVHEELTKSMTT	Peptide950		0.279327	-0.098901	0.410575	0.214377	0.244722	0.0628264		0.481844	0.26369	0.616745	0.202774	0.464431	0.336374		0.112915	0.154673	0.298693	0.0805868	0.162953	0.343336		0.540053	0.172025	0.655684	0.37938	0.158214	0.196189		0.304073	0.0516619	0.478272	0.308941	0.471414	0.290418									0.645694	-0.0179318
A0A0A0MSY4	DOCK9	S1254	STPNINSVR DSRGSLISTDSGNSLPERNS	Peptide951		0.0295633	0.101208	0.531638	0.149316	0.486269	0.264556									0.271335	0.280352	0.528143	0.305544	0.558488	0.31185									-0.237599	0.150256	-0.115541	-0.0390146	0.0822226	0.453443									0.00614857	0.0366048
A0A0A0MT33	SCAF8	S695	VKSSEPVKETVQTTQSPTPVEKETVVTTQAE	Peptide952		0.330481	-0.149497	0.296447	0.286366	0.408942	0.298975									0.128081	0.134339	0.454737	0.221474	0.0883639	0.188957		0.106076	-0.133074	0.246392	0.0200705	-0.049884	0.231131		-0.0488121	-0.282797	0.146195	-0.0467762	0.428774	0.0665289									0.266119	-0.249755
O75369-2	FLNB	S2454	VGSPFKAKVTGQRLVSPGSANETSSILVESV	Peptide953																-0.550476	0.990147	0.669735	-0.402363	-0.34978	-0.224052		-0.496591	1.19124	0.581559	-0.373583	-0.178984	-0.149876		-0.370644	1.21857	0.667832	-0.304276	-0.170412	-0.30736									0.0910927	0.763785
A0A0C4DG88	POU2F1	S355	QKEKRINPPSSGGTSSSPIKAIFPSPTSLVA	Peptide954																														-0.319809	-0.422084	0.191151	-0.25303	-0.0148309	-0.185309
A0A0A0MT60	FKBP15	S1004	SSGQPQAPLNRERPESPMVPSEQVVEEAVPL	Peptide955		-0.300143	-0.704263	0.279332	0.186296	-0.00806413	-0.103175		-0.031738	-0.251162	0.42799	0.162097	0.117037	0.413339		-0.508776	-0.548716	-0.50729	-0.373866	-0.224051	-0.111253									0.0380421	-0.223393	0.0427928	-0.216757	-0.0395934	0.357291									-0.119216	-0.161422
A0A0A0MT60	FKBP15	S1139	TSDPEEGDPLALGPESPGEPQPPQLKKDDVT	Peptide956																																												-0.526098	-0.562686
A0A0A0MT60	FKBP15	S981	SEEEEEKAEERPRRPSQEQSASASSGQPQAP	Peptide957		-0.0532683	-0.0319345	0.0159313	0.160778	0.0148599	0.136178		-0.0211111	0.0189192	-0.155592	0.223166	-0.297147	-0.387903		-0.431099	0.272223	0.015039	-0.137994	-0.126259	-0.140068		-0.260577	0.183036	-0.0538525	-0.00586888	-0.137293	0.0343556		-0.145535	-0.0595611	0.0286136	-0.0831313	0.081306	-0.101224		0.443396	-0.098787	0.448155	0.166017	-0.016514	-0.428114		0.23573	-0.261717
C9JUH3	CCM2	S287	LETIGVKDGRGIITDSFGRHRRALSTTSSST	Peptide958									-0.0108007	-0.454739	-0.178161	-0.123329	0.162207	-0.512991																														0.0489796	-0.78195
A0A0A0MTR7	RNF213	S1258	PLSEPKEDQEAAELLSEPEEESERHILELEE	Peptide959									0.118837	-0.207129	0.13732	0.100505	0.126809	-0.243149																														-0.234293	-0.313725
A0A0A0MTD1	STAU2	S448	NGTSSTAEAIGLKGSSPTPPCSPVQPSKQLE	Peptide960		0.337663	-0.880566	0.242675	0.148885	-0.312468	0.126002																0.171279	-0.555409	0.280581	0.160626	-0.400166	0.211782		0.011523	-0.975943	0.617401	0.150453	-0.00276927	-0.120674									-0.0809597	-0.887128
Q8WWI1	LMO7	S1010	SLSQDQAATSKATLSSTSGLDLMSESGEGEI	Peptide961																-0.208694	-0.223247	-0.153586	-0.180408	-0.257444	-0.135115		-0.229445	-0.550623	-0.330424	-0.30651	-0.543348	-0.409965
Q8WWI1	LMO7	S1018	TSKATLSSTSGLDLMSESGEGEISPQREVSR	Peptide962		0.0210184	0.0781904	0.102193	0.179767	0.0235915	0.0584152		0.0886487	-0.00976188	0.173915	0.168594	-0.172697	0.219592									0.0531693	0.10721	-0.129122	-0.0450159	0.186717	0.579227		-0.0652353	-0.286784	-0.118642	-0.0484211	0.466274	0.163587		0.11015	-0.00343236	-0.0753651	0.0492839	0.991166	0.039686		-0.166775	0.0683939
Q8WWI1	LMO7	S1026	TSGLDLMSESGEGEISPQREVSRSQDQFSDM	Peptide963		0.157888	0.656758	-0.201279	-0.453234	-0.00526763	0.0110643									-0.0446885	-0.147298	-0.410284	-0.0913339	-0.239672	-0.234635		-0.17555	0.00972431	-0.405483	-0.0407435	0.0873667	-0.224404		-0.594347	-0.502112	-0.536576	-0.417178	0.524495	-0.031704		-0.0831305	-0.25381	-0.268019	-0.241708	1.31029	0.010914		-0.600017	-0.200341
Q8WWI1	LMO7	S988	QKEVAATEEDVTRLPSPTSPFSSLSQDQAAT	Peptide964																							0.086953	-0.330498	0.0182158	-0.213741	-0.141659	-0.703485		-0.381068	-0.469654	-0.207247	-0.412437	0.863409	-0.741236									-0.697265	-0.537456
Q8WWI1	LMO7	S991	VAATEEDVTRLPSPTSPFSSLSQDQAATSKA	Peptide965									0.35761	0.0549941	0.619082	0.076644	-0.0935524	0.0838292																-0.114945	-0.275467	-0.134465	-0.152148	0.860772	-0.414913									-0.546027	-0.224681
Q8WWI1	LMO7	S1510	NKEPVSLPGIMRRGESLDNLDSPRSNSWRQP	Peptide966		0.361335	0.524951	0.28733	0.138766	0.0199296	0.104281		0.360522	0.173328	0.332915	-0.0824587	-0.221879	-0.0802026		0.133	0.0343607	0.0895084	0.135561	0.0714128	-0.00729215		0.293517	0.249465	0.191449	0.159831	0.170072	0.111725		0.0755784	-0.0194931	0.0220144	0.0125604	0.760053	-0.132892		0.329556	0.209192	0.286193	0.0717752	0.643088	0.143214		0.0198244	0.145097
Q8WWI1	LMO7	S1516	LPGIMRRGESLDNLDSPRSNSWRQPPWLNQP	Peptide967																-0.035687	-0.0456741	-0.243159	-0.0505736	-0.0291117	-0.197857		-0.0507908	0.236099	-0.254694	-0.107898	-0.15283	-0.212717		-0.290646	-0.0757525	-0.213414	-0.145177	0.198047	-0.267949									-0.0997278	-0.0321096
Q8WWI1	LMO7	S540	ANPYVLRAFEDFRKFSEQDDSVERDIILQCR	Peptide968		-0.30642	0.395142	-0.0373373	-0.376242	0.266547	0.402762									-0.207214	0.68024	-0.162796	-0.252198	0.0391614	0.601605		-0.262575	0.193831	-0.237475	-0.202394	-0.028231	0.891903		-0.449048	-0.291733	-0.364702	-0.481971	0.495378	1.06335									-0.223861	-0.11143
Q8WWI1	LMO7	S919	DTVRLTSVVTPRPFGSQTRGISSLPRSYTMD	Peptide969									-0.0566506	-0.494472	0.0639312	-0.174516	0.131069	0.245637									-0.154305	-0.817399	-0.0973047	-0.162837	-0.0147224	-0.109057									-0.559466	-0.630675	-0.287337	-0.37398	0.37561	-0.52376		-0.54534	-0.600112
Q8WWI1	LMO7	S805	SQNQKSTVPSRRRMYSFDDVLEEGKRPPTMT	Peptide970		0.727245	-0.0388265	0.970809	0.475218	0.574499	0.456155		0.57419	0.244933	0.922208	-0.0359348	0.353734	0.148777		0.194874	0.0299599	0.310209	0.117693	0.590707	-0.014366		0.527827	0.19932	0.644763	0.330515	0.905229	0.311035		0.247926	0.1305	0.20631	0.273789	1.15304	0.246146		0.371973	0.307996	0.488317	0.202671	1.93645	0.206408		0.1233	0.26999
Q8WWI1	LMO7	S491	DPTSGPRLITRRKNLSYAPGYRRDDLEMAAL	Peptide971		0.125264	-0.701618	-0.0795587	-0.493842	-0.816534	-0.310147		-0.0307402	-0.601017	0.211963	-0.129068	-0.759148	-0.265096
Q8WWI1	LMO7	S1563	PQLVSTSNRAYMRNPSSSVPPPSAGSVKTST	Peptide972																0.381187	0.416515	-0.220531	-0.201945	0.627555	-0.0762298		-0.44815	-0.127552	-0.342359	-0.127614	0.658241	-0.0882087		-0.552668	-0.394888	-0.515532	-0.294336	0.572264	0.450563
Q8WWI1	LMO7	S1565	LVSTSNRAYMRNPSSSVPPPSAGSVKTSTTG	Peptide973																																												-0.687274	-0.624874
Q8WWI1	LMO7	S322	ALPFNRFLPNKSRQPSYVPAPLRKKKPDKHE	Peptide974									0.373214	0.255798	0.386676	0.402885	0.128711	0.210302																0.0156695	0.0217426	-0.00981279	-0.0162089	0.54967	0.0491394		-0.154789	0.0492153	0.147908	-0.139813	1.05467	-0.156235		-0.114748	0.327644
Q8WWI1	LMO7	S300	KMQDYNKDDMSYRRISAVEPKTALPFNRFLP	Peptide975																0.541208	0.114208	0.226722	0.277835	0.46187	0.362352		0.476429	-0.361755	0.0843612	-0.0637654	0.336738	-0.270089		0.123498	0.134039	-0.1133	0.175241	-0.15184	0.0244927									-0.131248	0.292961
Q8WWI1	LMO7	S1491	KRTPLHNDNSWIRQRSASVNKEPVSLPGIMR	Peptide976																																												-0.995647	-0.521798
Q8WWI1	LMO7	S1493	TPLHNDNSWIRQRSASVNKEPVSLPGIMRRG	Peptide977		0.426705	-0.476683	0.480469	0.389784	0.0866811	0.271577		0.397788	-0.101614	0.579113	0.305116	0.177816	0.121247																0.106087	-0.275179	0.0967641	0.109665	0.81202	0.106243		0.211977	0.176625	0.217669	0.0334036	1.10734	0.062939		-0.232446	0.173922
Q8WWI1	LMO7	S1500	SWIRQRSASVNKEPVSLPGIMRRGESLDNLD	Peptide978		0.0580878	-0.77591	0.344908	0.0665258	0.017	0.0708587		0.603043	0.0255484	1.07392	0.465773	0.324567	0.446567																0.25952	0.0307027	0.187827	0.0889446	0.61355	0.212149									-0.215925	0.134768
Q8WWI1	LMO7	S1591	TSTTGVATTQSPTPRSHSPSASQSGSQLRNR	Peptide979																							-0.223358	-0.130152	-0.310289	-0.325926	-0.279614	-0.0983508		-0.256091	-0.456192	-0.251942	-0.434495	0.0677796	-0.177339
Q8WWI1	LMO7	S392	SKSSCYLEEEKAKTRSIPNIVKDDLYVRKLS	Peptide980									0.131421	-0.637082	0.301741	0.336994	-0.313565	0.137961																							0.119282	-0.0815453	-0.164553	-0.293006	0.950887	-0.147555		-0.6193	-0.166899
Q8WWI1	LMO7	S704	SPVYTEADGTFSRSKSMSDVSAEDVQNLRQL	Peptide981		0.227092	-0.0241814	0.211722	-0.0130983	-0.0331125	0.084249		0.545913	0.00367836	0.343962	0.177774	-0.153996	0.252925		-0.0847573	-0.0107636	-0.0806372	0.0824223	0.0202738	0.120454									0.118653	-0.0395094	-0.0361078	0.128593	0.421264	0.182671									0.0148629	-0.0365006
Q8WWI1	LMO7	S1034	ESGEGEISPQREVSRSQDQFSDMRISINQTP	Peptide982																							0.175595	-0.0836401	0.212783	0.0220271	0.0669819	0.224651		-0.159643	-0.305392	0.178016	-0.193339	0.449425	0.0730933									0.00544626	-0.151903
Q8WWI1	LMO7	S1039	EISPQREVSRSQDQFSDMRISINQTPGKSLD	Peptide983																-0.178333	-0.330519	-0.334843	-0.262012	-0.20464	-0.331413		-0.0688952	-0.705982	-0.346253	-0.486036	-0.701967	-0.429833
Q8WWI1	LMO7	S1423	EASSGFLPGDRNKSRSTTELDDYSTNKNGNN	Peptide984		0.697748	0.0403352	0.861148	0.353975	0.0203537	0.214224		1.01062	0.64804	1.15355	0.468214	0.111342	0.650373		0.461855	0.0745113	0.456829	0.351358	0.111799	0.154466		0.602727	0.948381	0.399734	0.645452	0.516406	0.575012		0.533943	0.392434	0.597367	0.590192	0.610031	0.435937									0.349768	0.462814
Q8WWI1	LMO7	S342	PLRKKKPDKHEDNRRSWASPVYTEADGTFSS	Peptide985																							0.222736	-0.517542	-0.139632	-0.136902	-0.13004	-0.228125		-0.536514	-0.626104	-0.451995	-0.291115	0.840528	-0.292093
Q8WWI1	LMO7	S751	QKWQDDLAKWKDRRKSYTSDLQKKKEEREEI	Peptide986		0.0132427	-0.312572	1.14878	-0.0533901	0.0604161	0.258492		0.395545	1.37621	0.692634	0.0385979	0.736395	0.290861		0.515242	0.679237	-0.639578	0.0258545	0.935444	-0.419896		0.891361	0.343825	0.592443	0.390697	0.782263	-0.184549		0.460354	0.634541	-0.417941	0.750141	0.390745	0.642452									0.237685	0.542576
Q8WWI1	LMO7	S960	DIKRTPNNVVSTPAPSPDASQLASSLSSQKE	Peptide987																																												-0.732675	-0.377014
Q8WWI1	LMO7	S1586	AGSVKTSTTGVATTQSPTPRSHSPSASQSGS	Peptide988																-0.45214	-0.434564	-0.304827	-0.335965	-0.392512	-0.343297		-0.0957479	-0.681407	-0.275143	-0.197931	-0.176253	-0.207439		-0.265124	-0.733814	-0.500229	-0.581115	0.275579	-0.142367		-0.128878	-0.226642	-0.14073	0.078006	1.04866	0.0439938		-0.167755	-0.929849
Q8WWI1	LMO7	S865	FAKREDRVTTEIQLPSQSPVEEQSPASLSSL	Peptide989		-0.195753	-0.695059	-0.419334	-0.336437	-0.0201956	0.116555		-0.738083	-1.11979	-0.6486	-0.293195	-0.631027	-0.126733																							-0.0463489	-0.417806	-0.302391	-0.381525	-0.0893002	-0.125323
Q8WWI1	LMO7	S867	KREDRVTTEIQLPSQSPVEEQSPASLSSLRS	Peptide990		0.019027	0.00457246	0.0898145	-0.0235283	0.381409	0.308806		-0.286933	-0.179042	-0.0763958	0.101662	-0.37358	0.478222		-0.410621	-0.00915066	-0.249893	-0.0341959	-0.186935	0.0987521		-0.159497	-0.0837607	-0.291598	-0.125974	0.127163	0.966243		-0.324047	-0.276289	-0.341601	-0.159742	0.414157	0.5223		-0.1564	-0.0773483	-0.296522	-0.164215	1.38197	0.429833		-0.342901	-0.0541053
H3BMG9	FAM65A	S305	AASSVNKASTVTKRFSTYSQSPPDTPSLREQ	Peptide991		0.240008	0.0237376	0.281075	-0.368408	-0.0298274	-0.018797									0.603874	0.306695	0.0618257	0.518762	0.310751	0.508407									-0.104049	-0.162655	0.0125456	-0.156982	-0.352326	-0.112853
H3BMG9	FAM65A	S310	NKASTVTKRFSTYSQSPPDTPSLREQAFYNM	Peptide992		-0.363403	-1.30719	-0.114475	0.0125619	-0.0702334	-0.0181068		0.322199	-0.519851	0.490983	0.0507446	0.277509	0.237662																-0.0946435	-0.577994	0.111478	-0.269789	0.419068	0.0812953									0.0477052	-0.769785
H3BMG9	FAM65A	S36	RPQRRLLSARVNRSQSFAGVLGSHERGPRAY	Peptide993		-0.428773	-1.00164	-0.00538763	-0.162355	-0.142584	0.0721494		-0.430619	-1.45153	-0.241257	-0.61427	-0.373413	-0.558925																							-0.354125	-0.538587	-0.190313	-0.150989	0.207426	-0.412665
A0A0A0MTP7	SCAF11	S842	TSRENKRSQPRVKDSSPGEKSRSQSRERESD	Peptide994		0.323051	-0.0877442	0.0872329	0.157543	0.13486	0.00541286																0.233884	0.165761	0.377029	-0.0287904	-0.118351	0.0267142		-0.0720722	-0.313885	0.450933	0.0222299	0.310658	-0.0499425
A0A0A0MTS2	GPI	S37	DPQFQKLQQWYREHRSELNLRRLFDANKDRF	Peptide995		-0.107912	0.174448	-0.0317848	-0.0627934	0.0765641	-0.0578294		-0.174228	0.0264825	-0.0982782	-0.156679	-0.510479	-0.0578377		-0.056371	0.283598	0.129856	0.203705	0.168284	0.191602		-0.0292152	-0.0495624	-0.210569	-0.0664906	-0.174549	-0.0591685		-0.0700479	0.00328613	0.0783557	-0.154914	-0.0892914	-0.105332		0.365497	-0.151018	-0.00191228	-0.349579	-0.292343	0.0858729		-0.0920567	0.0242996
A0A0A0MTS2	GPI	S470	KSTEEARKELQAAGKSPEDLERLLPHKVFEG	Peptide996		0.0772378	-0.291721	0.334707	0.157875	0.298186	0.0751741		0.425666	0.364825	0.886452	0.159501	0.215623	0.398389		0.126576	0.216574	0.249432	0.0571424	0.248951	0.254435		0.435353	0.32339	0.466486	0.208064	0.20043	0.130151		0.349504	0.367502	0.516521	0.240459	0.106616	0.245086									0.336101	0.160325
A0A0A0MTS2	GPI	S547	LGKQLAKKIEPELDGSAQVTSHDASTNGLIN	Peptide997									-0.185804	-0.249859	0.0442331	-0.121246	0.0749786	-0.0606578		-0.316964	-0.284546	0.0573853	-0.0494856	0.108313	0.0524987		-0.00920101	-0.507906	0.0307366	-0.0291009	-0.0261383	-0.0542259									-0.0738388	-0.231999	0.0608601	-0.123912	-0.151079	-0.02568		-0.290722	-0.285719
A0A0A0MTS2	GPI	S552	AKKIEPELDGSAQVTSHDASTNGLINFIKQQ	Peptide998																							-0.0214438	-0.396929	0.087781	-0.121998	-0.145945	0.0361835		-0.171937	-0.247664	0.127707	-0.229535	-0.127482	-0.0576663									-0.273742	-0.438522
A0A0A0MTS2	GPI	S122	YTEGRAVLHVALRNRSNTPILVDGKDVMPEV	Peptide999		0.422415	-0.185486	0.605514	0.415403	0.34497	0.400909		0.463471	0.113349	0.738405	0.0898493	0.282277	0.221992		0.255086	0.117913	0.60376	0.389497	0.472757	0.438972		0.418087	0.0193852	0.577115	0.340245	0.297379	0.271324		0.275231	0.127097	0.691627	0.234967	0.341297	0.37032		0.432731	0.0854061	0.56029	0.277926	0.0853329	0.407791		0.270864	0.168156
A0A0A0MTS2	GPI	S191	DLGPLMVTEALKPYSSGGPRVWYVSNIDGTH	Peptide1000																-0.197548	-0.137728	0.344224	0.140893	0.191201	0.134862																							-0.714974	-0.303368
A0A0A0MTS2	GPI	S218	DGTHIAKTLAQLNPESSLFIIASKTFTTQET	Peptide1001									0.0837839	-0.0189842	0.290932	-0.178037	-0.173659	0.0240418		-0.340939	-0.139557	-0.189506	-0.00594746	-0.143257	0.0512682		-0.0162512	-0.226648	0.0481084	0.0387009	-0.0637664	-0.0347049		-0.166919	-0.161097	0.121115	-0.0923965	-0.120405	0.125665		-0.119227	-0.346767	-0.13159	-0.121203	-0.329347	0.0198143
A0A0A0MTS2	GPI	S219	GTHIAKTLAQLNPESSLFIIASKTFTTQETI	Peptide1002																																					-0.228149	-0.596432	-0.136251	-0.185649	-0.443198	-0.11624
A0A0A0MTS2	GPI	S225	TLAQLNPESSLFIIASKTFTTQETIT ETA	Peptide1003																0.157763	0.0374826	0.0497684	-0.0399192	-0.126071	0.0967344		0.0790008	-0.20513	0.217178	-0.0824351	-0.241742	-0.234372		-0.146647	-0.0706406	0.04655	-0.154672	-0.196898	-0.0828471
A0A0A0MTS7	TTN	S8341	VDHSDVGEYSCKADNSVGAVASSAVLVIKAR	Peptide1004									0.326366	-0.164434	0.406363	0.210598	0.255093	0.390836									0.172577	-0.259801	0.183458	0.0953126	0.159292	0.0464678		-0.0464529	-0.376395	0.07694	0.0838242	0.164806	-0.00116232		-0.163425	-0.57285	-0.103754	-0.137002	0.395508	-0.0552015		-0.0794231	-0.207375
A0A0A0MTS7	TTN	S9282	VDINDSGEYICKAENSVGEVSASTFLTVQEQ	Peptide1005																							-0.0898232	-0.202751	0.133136	-0.084082	-0.31947	-0.0724619		-0.291211	-0.325344	0.365223	-0.23689	-0.254176	-0.0813449
A0A0A0MTS7	TTN	S9287	SGEYICKAENSVGEVSASTFLTVQEQKLPPS	Peptide1006																																					-0.125741	-0.669549	0.197246	0.109084	0.223315	0.0371301		-0.949741	-0.847095
A0A0A0MTS7	TTN	S13232	VLEEKPAVPVPERAESPPPEVYEEPEEIAPE	Peptide1007		0.432708	-1.2069	0.436907	1.01199	0.263052	0.575214																							-0.286323	-0.577069	0.246155	-0.368054	0.53708	0.0222098		0.4436	-0.260304	0.780579	0.585804	0.912103	0.227681		-0.396255	-0.523826
A0A0A0MTS7	TTN	S6003	TYTCSATNKAGHNQCSGHLTVKEPPYFVEKP	Peptide1008		-0.226538	-0.476089	-0.229376	0.0186132	-0.0401773	0.110956		0.614668	0.331965	1.02861	0.687582	0.35178	0.588502									0.330113	0.0503528	0.477121	0.30319	0.217285	0.456068		0.308195	0.01057	0.537592	0.257191	0.34246	0.179734		0.017141	-0.425572	0.127938	-0.157403	-0.346691	0.156783		0.0411918	0.115936
A0A0A0MTS7	TTN	S6393	FLLVQEPAQIVEKAKSVDVTEKDPMTLECVV	Peptide1009																0.816814	0.248555	0.555825	0.505206	0.503841	0.421394		0.0520393	0.220822	0.267316	-0.122742	0.113032	-0.0945222		0.231657	0.121423	0.331679	0.246541	-0.455441	0.0749469									0.0636181	0.246715
A0A0A0MTS7	TTN	S10276	TTLIPAKAPEIIDVSSKAEEVKIMTITRKKE	Peptide1010		0.122322	0.479939	0.166246	0.311531	0.441681	0.12932		0.00641782	0.482713	0.161851	0.147001	0.227389	0.0530615		0.437326	0.174288	0.425316	0.230703	0.618644	0.231477		0.0979329	0.290508	0.191203	0.0588767	0.425289	0.144642		0.19361	0.337701	0.348921	0.12873	0.215093	0.173937		0.119665	0.526193	0.313087	0.135126	0.243461	0.183149		-0.044403	0.486009
A0A0A0MTS7	TTN	S7709	TALTVKAPPVFTQKPSPVGALKGSDVILQCE	Peptide1011		0.36914	-0.229848	0.51183	0.568646	0.345281	0.406897		0.402705	0.0613744	0.716301	0.266329	0.327086	0.314127		0.305517	0.0437309	0.474675	0.265084	0.395618	0.310313		0.420581	0.00192294	0.640687	0.323984	0.336723	0.212015		0.360273	0.0606422	0.523039	0.316103	0.404122	0.370529		0.396497	0.121716	0.496415	0.277654	0.341671	0.295896		0.247667	0.124499
A0A0A0MTS7	TTN	S6841	SDIGEYHCKAQNEVGSDTCVCTVKLKEPPRF	Peptide1012		-0.204924	-1.21226	0.0147517	0.372873	-0.0850181	0.211778																																					-0.938062	-0.49922
A0A0A0MTS7	TTN	S13395	EVEETPEEIIYEEKASITIGRKETPPVEERE	Peptide1013																																												-0.467554	-0.177897
A0A0A0MTS7	TTN	S9665	RDVAKADSGDYVCKASNVAGSDTTKSKVTIK	Peptide1014																0.548801	0.385897	0.535426	0.464132	0.356181	0.527323		0.214466	0.257538	0.350714	0.175413	0.0218494	0.0156933		0.305714	0.257393	0.394395	0.113377	-0.169896	0.109241									0.154851	0.180208
A0A0A0MTS7	TTN	S9670	ADSGDYVCKASNVAGSDTTKSKVTIKDKPAV	Peptide1015																0.430547	0.406943	0.402707	0.350454	0.344404	0.400412		0.339299	0.156524	0.39423	0.143626	0.055532	-0.0837619		0.267745	0.219611	0.501314	0.171625	-0.137593	0.0942709									0.16673	0.313152
A0A0A0MTS7	TTN	S6087	FAAKATDSGTYICQLSNDVGTATSKATLFVK	Peptide1016																0.149339	-0.158935	-0.127485	-0.0794752	-0.0399453	-0.0738671		-0.31031	-0.415809	-0.322626	-0.45176	-0.524101	-0.530458
A0A0A0MTS7	TTN	S8723	ADIGEYQCKATNDVGSDTCVGSIALKAPPRF	Peptide1017									-0.102527	-0.0955444	0.154063	-0.112607	0.0276154	0.138384		0.477235	-0.0166309	0.312857	0.298893	0.014794	0.209719		0.247295	-0.111549	0.265607	0.00451036	-0.0488252	0.0699124		-0.031691	-0.120139	0.181904	0.0601123	0.226273	0.0903824		0.202492	-0.123335	0.201119	0.110136	0.302405	0.192775		-0.114719	0.179227
A0A0A0MTS7	TTN	S7782	SDVGEYHCKATNEVGSDTCSCSVKFKEPPRF	Peptide1018																							0.0240136	-0.14939	-0.000294264	-0.368474	-0.803214	-0.294746		-0.511181	-0.554783	-0.0353617	-0.453647	-0.123359	-0.457014
A0A0A0MTS7	TTN	S5437	NDAGNFTCRATNSVGSKDSSGALIVQEPPSF	Peptide1019																							0.110455	-0.156224	0.265847	-0.0846843	-0.0106529	-0.293998		-0.112881	-0.19588	0.208184	-0.302346	0.0385188	-0.16178									-0.203279	-0.230353
A0A0A0MTS7	TTN	S10982	MEEKERAYTLEEEAVSVQREEEYEEYEEYDY	Peptide1020		-0.209108	0.0866606	0.0716504	-0.0690904	0.309437	-0.112524		-0.109215	-0.188432	-0.0612986	-0.0377378	0.101421	-0.119418		-0.00420639	0.00551894	0.00127257	0.0803823	0.356603	0.0401086		-0.234482	-0.0841924	-0.148165	-0.00134585	0.408381	-0.213475		-0.0057093	-0.0316803	0.0359297	-0.0757518	0.102793	-0.180535		-0.0708795	0.160609	-0.00901186	0.0377138	-0.0367878	-0.023561		-0.175472	0.0384549
A0A0A0MTS7	TTN	S5960	SHPISIQWFKDDQEISASEKYKFSFHDNTAF	Peptide1021																							0.461326	0.04747	0.77414	0.244656	0.191693	0.0785529		0.196264	-0.0101561	0.808688	0.049009	0.162616	0.0905076									0.104555	0.00460239
A0A0A0MTS7	TTN	S5962	PISIQWFKDDQEISASEKYKFSFHDNTAFLE	Peptide1022																0.712101	0.386947	0.714197	0.509374	0.335847	0.505752									0.150259	0.0436559	0.58604	0.0956884	-0.211246	0.193402									0.0419037	0.114328
A0A0A0MTS7	TTN	S6616	PPFKIKWFKDDVELVSGPKCFIGLEGSTSFL	Peptide1023																0.499654	0.00223415	0.814167	0.602308	0.468946	0.616421									0.180115	-0.273238	0.180369	-0.024115	0.306733	0.148014		0.451911	0.0130023	0.604566	0.304115	0.443769	0.460889		-0.120264	0.0163558
A0A0A0MTS7	TTN	S8593	EIKVLWYKDETEIQESSKFRMSFVDSVAVLE	Peptide1024																1.06962	0.402932	0.84072	0.677692	0.572083	0.734441		0.612874	0.397698	0.909731	0.47013	0.389288	0.274548		0.5025	0.377756	0.989693	0.570447	-0.0450271	0.44087									0.316437	0.471186
A0A0A0MTS7	TTN	S8594	IKVLWYKDETEIQESSKFRMSFVDSVAVLEM	Peptide1025																0.799606	0.439838	0.716743	0.50009	0.483308	0.62616		0.411286	0.16746	0.716635	0.40585	0.354924	0.278739		0.363132	0.24391	0.805012	0.408849	-0.0405988	0.359091									0.102276	0.34816
A0A0A0MTS7	TTN	S8212	TPPISVSWIKDEYLISQSERCSITMTEKSTI	Peptide1026		0.45805	-0.0283659	0.533521	0.394547	0.189148	0.339816		0.278578	0.194209	0.527751	0.267922	0.297114	0.37717		0.192959	0.130507	0.411975	0.314118	0.355061	0.342317		0.332904	0.103649	0.551981	0.350492	0.240255	0.307292		0.318527	0.229345	0.467793	0.218256	0.393233	0.296423		0.491322	0.196516	0.418692	0.242295	0.240474	0.316785		0.283201	0.103507
A0A0A0MTS7	TTN	S8214	PISVSWIKDEYLISQSERCSITMTEKSTILE	Peptide1027									-0.131944	-0.082213	0.329285	0.0431442	-0.0317375	0.156021		-0.385296	-0.352134	-0.120673	-0.339564	-0.204436	-0.0900933																							-0.377079	-0.100973
A0A0A0MTS7	TTN	S4836	TPVIETIWQKDGAALSPSPNWRISDAENKHI	Peptide1028																0.0983545	-0.0225841	0.00857881	0.155055	0.0600591	0.0832912		0.00108703	-0.0978022	-0.169511	0.0435084	-0.0367403	0.0418158		0.0165098	-0.0157787	0.0712712	-0.0450706	-0.248694	-0.236808									-0.178939	0.166524
A0A0A0MTS7	TTN	S9344	PISVSWYKDGKPLKDSPNVQTSFLDNTATLN	Peptide1029																0.330049	-0.194136	0.135226	0.110512	0.101769	0.145095		-0.123167	-0.365158	0.343296	-0.304055	-0.340497	-0.369593		-0.242879	-0.715953	0.250897	-0.419855	0.112468	-0.0708689		-0.0535649	-0.368891	-0.0278352	0.108226	0.619803	0.148646
A0A0A0MTS7	TTN	S5867	ITAKWFKDGQELTLGSKYKISVTDTVSILKI	Peptide1030		0.886716	-0.325044	1.03261	0.81827	0.525613	0.631861		0.526051	0.160553	0.912794	0.342803	0.461016	0.550179		0.620195	0.290414	0.827172	0.587199	0.6041	0.675968		0.610202	0.0887086	0.873308	0.480372	0.577814	0.452661		0.611025	0.218287	0.888118	0.512306	0.563437	0.404804		0.690407	0.252426	0.859767	0.415794	0.657946	0.51396		0.476156	0.337404
A0A0A0MTS7	TTN	S5304	ELKPKWYKDGRPLVASKKYRISFKNNVAQLK	Peptide1031		0.39108	-0.0642243	0.620568	0.182843	0.684504	-0.0535951									0.528787	0.608701	0.758739	0.628505	0.499575	0.583992		0.396644	0.055059	0.568654	0.271971	0.0783161	-0.0799908		0.320204	0.272018	0.732742	0.168982	-0.191791	0.22714									0.134939	0.255685
A0A0A0MTS7	TTN	S7603	QATNDVGKDMCSAQLSVKEPPKFVKKLEASK	Peptide1032																							0.172395	-0.168441	0.470366	-0.255772	-0.136053	-0.23453		-0.376699	-0.201478	0.338666	-0.52029	0.388734	-0.16497									-0.125874	-0.342747
A0A0A0MTS7	TTN	S7839	ISVVWLKDRGEVIRESENTRISFIDNIATLQ	Peptide1033		-0.371515	0.0940268	0.353855	0.410399	0.0350081	0.24764		0.23903	0.0290117	0.320324	0.154151	-0.0595423	0.105706		0.0502856	0.179928	0.0685888	0.132039	0.298799	0.152671		0.133916	0.0195621	0.173498	0.163945	0.0771943	0.152765		0.115858	0.0985765	0.282983	0.151505	0.118584	0.109261		0.467227	0.19632	-0.127497	0.0307778	0.05767	0.120132		0.138508	0.0521126
A0A0A0MTS7	TTN	S9196	QYNCYIE SGKDSCSAQILILEPPYFVKQL	Peptide1034		0.137206	0.151303	0.28168	0.404158	0.137907	0.350444		0.355042	0.00995631	0.681451	0.17394	0.044113	0.341718		0.519325	-0.00765261	0.402243	0.366305	0.144334	0.331607		0.389851	0.0374295	0.604038	0.206332	0.0497615	0.261992		0.144338	0.0471533	0.497553	0.226195	0.314611	0.345614		0.318556	-0.0237506	0.31915	0.125318	0.186224	0.277991		0.21469	0.101627
A0A0A0MTS7	TTN	S8916	SFEVQNPVGKDSCTASLQVSDRTVPPSFTRK	Peptide1035																0.1041	-0.0182288	0.240028	0.136949	-0.0380269	-0.10947									0.0133457	-0.184846	0.058054	-0.0813778	-0.254154	0.0218881									-0.275526	0.138941
A0A0A0MTS7	TTN	S8920	QNPVGKDSCTASLQVSDRTVPPSFTRKLKET	Peptide1036		0.111353	0.0433771	0.093993	0.269226	0.219925	0.308109		0.226411	0.0313994	0.369254	0.12431	-0.0656892	0.218508		0.249497	0.101196	0.128652	0.15195	0.0236998	0.19218		0.2105	0.169747	0.218933	0.124562	-0.0603426	0.224042		0.122238	0.152084	0.254747	0.0999323	0.189428	0.142522		0.278947	0.233744	0.137603	0.116892	0.117587	0.152301		0.313367	-0.0093545
A0A0A0MTS7	TTN	S5890	DTVSILKIISTEKKDSGEYTFEVQNDVGRSS	Peptide1037		0.486289	-0.330428	0.699748	0.677106	0.392954	0.504146		0.502756	-0.0381296	0.714149	0.185414	0.302082	0.38007		0.384098	0.0433021	0.592664	0.347272	0.418193	0.405936		0.447588	-0.0505088	0.714123	0.287988	0.38249	0.28454		0.362646	0.0151709	0.637853	0.325864	0.46318	0.36556		0.553872	0.0110956	0.793083	0.305003	0.323798	0.39456		0.207401	0.175182
A0A0A0MTS7	TTN	S4968	KDSGTYVCTASNEAGSSSCSATVTVREPPSF	Peptide1038																							-0.21197	-0.330281	-0.0802277	-0.328411	-0.468081	-0.111253		-0.471037	-0.529469	0.0159115	-0.554061	0.245664	-0.296713		-0.0395513	-0.267467	0.101315	0.0763719	0.252888	-0.0182129		-0.682634	-0.377528
A0A0A0MTS7	TTN	S4969	DSGTYVCTASNEAGSSSCSATVTVREPPSFV	Peptide1039																0.43404	0.0963265	0.148912	0.103497	-0.199304	0.0219718									-0.432048	-0.102445	-0.200036	-0.324112	-0.476427	-0.0839002
A0A0A0MTS7	TTN	S5440	GNFTCRATNSVGSKDSSGALIVQEPPSFVTK	Peptide1040																-0.252038	-0.38463	-0.220484	-0.146967	-0.03458	0.0367514		0.00701866	-0.835491	0.024371	-0.40695	-0.452639	-0.512111
A0A0A0MTS7	TTN	S5441	NFTCRATNSVGSKDSSGALIVQEPPSFVTKP	Peptide1041		0.282248	-1.06712	0.279982	0.514554	0.0172642	0.340586		0.622227	0.280648	1.01575	0.576551	0.547131	0.691264									0.412925	-0.108686	0.817025	0.40852	0.415295	0.439328		0.347061	-0.0710266	0.759407	0.147486	0.59867	0.325582		0.194086	-0.457199	0.373796	0.218077	0.285258	0.205062		0.220427	-0.0367625
A0A0A0MTS7	TTN	S5451	GSKDSSGALIVQEPPSFVTKPGSKDVLPGSA	Peptide1042		0.297074	-1.77853	0.56099	0.274919	-0.0299551	-0.0250954																																					-0.568207	-0.501537
A0A0A0MTS7	TTN	S5458	ALIVQEPPSFVTKPGSKDVLPGSAVCLKSTF	Peptide1043		0.498512	-0.977883	0.505206	0.341946	-0.0398344	0.272463		0.374701	0.0275444	0.630142	0.398223	0.390994	0.380715									0.296126	-0.0834083	0.648639	0.230711	0.26361	0.251789		0.203621	-0.36749	0.665612	0.244112	0.347147	0.282567		0.135544	-0.488086	0.324369	0.0385745	0.240232	0.364494
A0A0A0MTS7	TTN	S7880	KYICQIKNDAGMRECSAVLTVLEPARIIEKP	Peptide1044																0.145192	-0.109021	0.288639	-0.0328208	-0.013343	0.142893		0.0518568	-0.355407	0.176865	-0.122667	-0.296273	-0.0496731		-0.161491	-0.471789	0.267997	-0.353498	-0.0572497	0.173856		0.10286	-0.0726975	0.412502	0.221383	0.399359	0.355594		-0.195367	-0.171456
A0A0A0MTS7	TTN	S10950	KVTEFRKRVVKEEKVSIEAPKREPQPIKEVT	Peptide1045		-0.145683	-1.08875	-0.0220207	0.0291545	0.931939	-0.173448		-0.139781	-0.562196	-0.0396515	-0.577019	0.775703	-0.626403		-0.14826	-0.411453	-0.247711	-0.454693	1.01348	-0.515828		-0.448142	-0.575708	-0.0026692	-0.5492	1.15211	-0.432376		-0.296766	-0.324872	-0.143952	-0.457932	0.575003	-0.314442		-0.233709	0.00877081	-0.191309	-0.282521	0.699848	-0.376371		-0.557724	-0.317963
A0A0A0MTS7	TTN	S10638	VVTEEKITIVTQREESPPPAVPEIPKKKVPE	Peptide1046		0.688767	-0.309822	0.730421	0.717661	0.426683	0.508375		0.410752	0.067151	0.644288	0.398266	0.429208	0.474899		0.450872	0.14883	0.67809	0.350791	0.571723	0.452986		0.445536	-0.010273	0.753198	0.395119	0.429889	0.378616		0.516902	0.161334	0.652545	0.405518	0.39087	0.393338		0.588896	0.190366	0.682871	0.50086	0.396566	0.364715		0.28796	0.286827
A0A0A0MTS7	TTN	S9888	IERSERDEKEFEELVSFIQQRLSQTEPVTLI	Peptide1047									0.0827072	-0.0353734	0.226183	-0.0760067	0.254942	-0.201682		0.246439	-0.22384	-0.369042	-0.408057	-0.0869124	-0.0577782									-0.167079	-0.0566219	0.123702	0.000856364	-0.474829	0.0877723
A0A0A0MTS7	TTN	S7930	TPELSAKWFKDGRELSADSKHHITFINKVAS	Peptide1048																							0.344104	-0.048254	0.552149	0.188485	0.214875	0.140104		0.217988	-0.144612	0.755064	0.0432072	0.0197659	0.120389									-0.133934	-0.13294
A0A0A0MTS7	TTN	S7933	LSAKWFKDGRELSADSKHHITFINKVASLKI	Peptide1049		0.535126	0.0817783	0.703374	0.522481	0.422685	0.2946									1.03511	0.542064	0.976245	0.734124	0.687562	0.725902		0.334216	0.0429484	0.46881	0.169398	0.0979512	0.0874934		0.337601	0.103491	0.7131	0.230012	0.0376045	0.169785									0.169697	0.107402
A0A0A0MTS7	TTN	S5023	SPVIQVTWFKNNKELSESNTVRMYFVNSEAI	Peptide1050		-0.0451266	-0.645225	0.0129935	-0.0502551	-0.214381	0.0199333		-0.206817	-0.601134	0.0969571	-0.183697	-0.193032	-0.193015									-0.245146	-0.626002	-0.161364	-0.0432214	-0.100843	-0.152273									0.0860211	-0.219174	0.0483465	-0.150319	-0.236438	-0.19994		-0.385535	-0.316193
A0A0A0MTS7	TTN	S5025	VIQVTWFKNNKELSESNTVRMYFVNSEAILD	Peptide1051									0.429328	0.385776	0.667763	-0.165083	0.0631696	0.348928		-0.471219	-0.153313	-0.287486	-0.425835	-0.124189	-0.121153		0.285125	0.183386	0.208651	0.119785	0.0182378	-0.0131688		0.0999996	0.294524	0.109452	0.0377779	-0.0140296	0.0935072									0.126384	0.127461
A0A0A0MTS7	TTN	S6020	HLTVKEPPYFVEKPQSQDVNPNTRVQLKALV	Peptide1052		0.493529	-0.0613894	0.49898	0.512865	0.283359	0.421926		0.350617	0.0334367	0.604909	0.15116	0.254556	0.280684		0.373296	0.0316498	0.523607	0.345891	0.400597	0.349922		0.375117	-0.0115012	0.608302	0.23445	0.297946	0.279406		0.298594	0.0580997	0.582156	0.237085	0.38525	0.314364		0.431595	0.0982687	0.547226	0.344275	0.340857	0.40966		0.314039	0.200661
A0A0A0MTS7	TTN	S5636	EAGSDHCSSIVIVKESPYFTKEFKPIEVLKE	Peptide1053		-0.187142	-1.16979	-0.103959	-0.302782	-0.321898	-0.232916
A0A0A0MTS7	TTN	S9950	YKGTEKLEPSDKFEISIDGDRHTLRVKNCQL	Peptide1054		0.293308	-0.260092	0.502505	0.510457	0.399616	0.41724		0.31497	-0.0315598	0.532138	0.175564	0.199888	0.246268		0.341881	0.0730862	0.371565	0.350978	0.397163	0.350005		0.341172	-0.0876579	0.546037	0.255626	0.246789	0.184953		0.26233	0.0588674	0.511968	0.25795	0.285495	0.244579		0.378265	0.0622676	0.42483	0.314025	0.247714	0.329538		0.191986	0.138308
A0A0A0MTS7	TTN	S7582	GNTPHLRILKVGKGDSGQYTCQATNDVGKDM	Peptide1055		0.353891	-0.142794	0.532792	0.408648	0.32592	0.380013									0.852471	0.380613	0.573244	0.655661	0.233996	0.51796		0.186071	0.240478	0.353727	0.139818	-0.147715	0.00109703		0.101936	0.187731	0.445058	0.177397	-0.0369621	0.159893									-0.0345329	-0.00694248
A0A0A0MTS7	TTN	S9464	ENSAHLTVLKVDKGDSGQYTCYAVNEVGKDS	Peptide1056									0.176755	-0.61447	0.210501	-0.202382	0.135155	-0.00886837		0.152632	-0.336499	-0.243993	-0.0867513	-0.268643	-0.171812									-0.347912	-0.237443	-7.30632e-05	0.0695506	-0.0525217	0.0643407		-0.0233528	-0.353606	0.0350736	-0.0196568	0.11754	0.0868716
A0A0A0MTS7	TTN	S9860	TDFRGLLQAFELLKQSQEEETHRLEIEEIER	Peptide1057		-0.785688	-0.922	-0.136931	-0.460691	0.885373	-0.325278		-0.275363	-0.963762	-0.135601	-0.592875	0.431633	-0.622994		-0.31017	-0.24041	-0.50623	-0.318752	0.377624	-0.262008		-0.650683	-0.628	-0.559293	-0.543156	1.10634	-0.649732		-0.325037	-0.314374	-0.34713	-0.423168	0.0917604	-0.628563		-0.464788	-0.0731788	-0.493096	-0.323387	0.196756	-0.673116		-0.400377	-0.604562
A0A0A0MTS7	TTN	S9056	IVKGTPPFSVSWFKGSSELVPGDRCNVSLED	Peptide1058																																												-0.799281	0.0677243
A0A0A0MTS7	TTN	S9057	VKGTPPFSVSWFKGSSELVPGDRCNVSLEDS	Peptide1059		-0.00984774	0.37161	-0.134965	-0.417828	0.190142	-0.0949858									0.488878	0.341859	0.19669	0.0907942	0.545639	0.403572		-0.342062	0.0841035	-0.231809	-0.438851	0.0507979	-0.0278309		-0.0295836	0.232563	-0.0762503	-0.0955558	-0.496989	0.0186858									-0.204506	0.318642
A0A0A0MTS7	TTN	S6166	KHGISFIDGLATFQISGARVENSGTYVCEAR	Peptide1060																							-0.139108	-0.422309	-0.123749	-0.121018	0.0196075	-0.0315958		-0.172341	-0.422216	0.0943521	-0.362167	0.0713379	-0.193628		-0.0949956	-0.462853	-0.0625451	-0.131375	0.20863	-0.229312		-0.322086	-0.426172
A0A0A0MTS7	TTN	S4855	NWRISDAENKHILELSNLTIQDRGVYSCKAS	Peptide1061		-0.305501	-0.294829	0.102838	-0.13326	0.0626253	0.0435294		0.0335505	-0.198561	0.396774	-0.211708	-0.154293	0.0471165		-0.354963	-0.102651	-0.106269	-0.124787	0.0368404	-0.108024		-0.00164048	-0.115289	-0.119742	-0.0987246	0.00568107	0.0141223		-0.00166108	-0.0607106	-0.049788	-0.0968566	-0.000787112	0.0039334		-0.0378576	-0.0807045	-0.222905	-0.0036443	0.0782119	-0.202724		-0.000185172	-0.131681
A0A0A0MTS7	TTN	S5593	FANDREIKESSKHRMSFVESTAVLRLTDVGI	Peptide1062									0.147903	0.214554	0.210936	0.244673	-0.0433281	0.225158									0.0967055	-0.0460459	0.179697	-0.105832	-0.125653	-0.103929		0.000150153	-0.0163219	0.0629097	-0.0360463	-0.362454	-0.00929549									-0.124627	0.0298682
A0A0A0MTS7	TTN	S5597	REIKESSKHRMSFVESTAVLRLTDVGIEDSG	Peptide1063		-0.495813	0.205303	-0.170581	-0.658529	-0.0895707	-0.349617		0.0263442	0.0252795	0.206958	-0.152027	-0.15144	-0.0536865		-0.055398	0.196296	-0.243473	0.00350164	0.0622112	0.0560028		-0.0238206	0.125623	-0.0567479	0.0277296	-0.115074	-0.288841
A0A0A0MTS7	TTN	S6694	VKAGDSSRLECKIAGSPEIRVVWFRNEHELP	Peptide1064		-0.238699	-1.01118	0.120907	0.113059	0.0749621	0.057441		-0.432414	-0.959688	-0.0960539	-0.529972	-0.296502	-0.309351		-0.335164	-0.127902	-0.0582295	-0.289371	0.257656	0.0454571																							-0.472573	-0.342485
A0A0A0MTS7	TTN	S5738	RVTLREPPSFIKKIESTSSLRGGTAAFQATL	Peptide1065																-0.184867	-0.0649439	0.0871399	-0.295604	0.218279	-0.0792144		-0.215085	-0.444969	-0.247625	-0.253545	-0.197393	-0.432458																-0.386002	-0.389354
A0A0A0MTS7	TTN	S5740	TLREPPSFIKKIESTSSLRGGTAAFQATLKG	Peptide1066		-0.225008	-0.148388	0.276921	-0.0242318	0.152231	-0.0448305		0.503332	0.429289	0.454777	0.287827	0.15356	0.347942		0.0272677	0.225866	-0.0139723	0.069407	0.182346	0.156217		0.241091	0.319465	0.143427	0.292235	0.121658	0.152973		0.378442	0.327271	0.203344	0.288915	0.038986	0.169577									0.322021	0.273201
A0A0A0MTS7	TTN	S8576	VKQDEFTRYECKIGGSPEIKVLWYKDETEIQ	Peptide1067		0.883246	-0.350833	0.912644	0.784321	0.358803	0.540508		0.116289	0.00965428	0.330985	0.303697	0.11001	0.464489		0.812576	0.288274	0.791378	0.61255	0.59065	0.4723									0.357478	0.493466	0.413438	0.228098	0.196013	0.350309		0.486847	0.501034	0.726539	0.258274	0.36765	0.478029		0.0944253	0.267714
A0A0A0MTS7	TTN	S10523	VQKEIVTEEKIHVAISKRVEPPPKVPELPEK	Peptide1068		0.112145	0.269285	0.513897	0.391618	0.468445	0.260542		-0.00622248	0.899726	0.135141	0.153534	0.613505	0.106937		0.320503	0.464329	0.438842	0.224283	1.07329	0.292104									0.266754	0.672047	0.330103	0.298554	0.0955731	0.445577		0.2058	0.775015	0.182522	0.292779	0.2012	0.162717		-0.302331	0.879522
A0A0A0MTS7	TTN	S8895	FFNKVSGLKIINVAPSDSGVYSFEVQNPVGK	Peptide1069									0.0120914	-0.178609	0.0297621	0.441691	0.417984	0.30294									-0.165277	-0.30288	0.037625	-0.00770577	0.225856	0.0785688		-0.0913004	-0.252521	0.12332	0.0596117	0.0359937	0.0894667		0.0637054	-0.262596	-0.0507094	-0.055158	-0.307658	-0.0571054		-0.388957	-0.293455
A0A0A0MTS7	TTN	S8897	NKVSGLKIINVAPSDSGVYSFEVQNPVGKDS	Peptide1070																-0.507983	-0.702403	-0.174954	-0.419278	-0.0986826	-0.410415		-0.533358	-0.90613	-0.378669	-0.398099	-0.130217	-0.373901									-0.199368	-0.517984	-0.0314753	-0.0285067	0.168396	-0.302604		-0.535092	-0.703263
A0A0A0MTS7	TTN	S5884	YKISVTDTVSILKIISTEKKDSGEYTFEVQN	Peptide1071									0.452037	-0.242094	0.881342	-0.170365	0.038793	0.221299									0.208005	-0.406855	0.217303	-0.127478	-0.305452	-0.162784
A0A0A0MTS7	TTN	S7484	FVDNVATLKILQTDLSHSGQYSCSASNPLGT	Peptide1072		-0.347834	-0.563998	-0.303325	-0.618553	-0.0687344	-0.333287
A0A0A0MTS7	TTN	S7490	TLKILQTDLSHSGQYSCSASNPLGTASSSAR	Peptide1073		-0.529335	-0.925975	-0.585412	-0.52188	-0.193945	-0.536512																-0.456963	-1.03756	-0.352029	-0.429837	-0.547811	-0.424968
A0A0A0MTS7	TTN	S5920	SCKARINVLDLIIPPSFTKKLKKMDSIKGSF	Peptide1074																-0.163872	-0.439068	0.212679	-0.0477811	0.221817	0.0554106																-0.0189918	-0.471281	0.0297829	-0.0430163	0.375866	-0.138984
A0A0A0MTS7	TTN	S11098	VPEEPKKVFEEKIRISITKREKEQVTEPAAK	Peptide1075									-0.547662	-0.168839	-0.633271	-0.397367	-0.204688	-0.602336
A0A0A0MTS7	TTN	S4844	QKDGAALSPSPNWRISDAENKHILELSNLTI	Peptide1076		0.181505	-0.157862	0.878767	0.496532	0.679436	0.463925									0.548039	0.241601	0.775782	0.376884	0.249367	0.449614		0.431927	-0.102521	0.64955	0.128466	0.0883865	-0.0625239		0.212684	0.044837	0.507213	0.0853871	0.109313	0.327472									0.367792	0.0566836
A0A0A0MTS7	TTN	S7857	TRISFIDNIATLQLGSPEASNSGKYICQIKN	Peptide1077									0.134647	-0.0123508	0.275365	0.370189	0.312039	0.7442		0.588552	-0.129338	0.373073	0.557229	0.321745	0.300947		0.231213	0.286165	0.410399	0.203351	0.497542	0.294094		0.194179	0.322078	0.2723	0.141569	0.267674	0.430044		0.154533	0.282799	0.234694	-0.0576059	0.811011	0.170409		-0.00731056	0.52616
A0A0A0MTS7	TTN	S7861	FIDNIATLQLGSPEASNSGKYICQIKNDAGM	Peptide1078																							-0.490432	-1.18484	-0.535501	-0.518635	-0.514895	-0.348761									-0.404548	-0.873358	-0.376514	-0.255166	0.0573344	-0.0916492
A0A0A0MTS7	TTN	S7633	KVAKQGESIQLECKISGSPEIKVSWFRNDSE	Peptide1079																0.746236	0.195815	0.883152	0.593088	0.518702	0.599848		0.369422	-0.229027	0.624923	0.106526	0.27223	0.0759373		0.127818	-0.102857	0.650763	0.0941848	0.336951	0.151285		0.554721	0.0496911	0.771258	0.416736	0.625169	0.50891		0.0857419	0.0949094
A0A0A0MTS7	TTN	S7635	AKQGESIQLECKISGSPEIKVSWFRNDSELH	Peptide1080		0.27881	-0.103138	0.436303	0.188652	0.156583	0.37702		0.302599	-0.568545	0.403207	-0.270385	-0.230881	0.066878		0.396027	-0.0185669	0.365102	0.228574	0.313554	0.257387									-0.0630091	-0.147755	0.20955	-0.0622734	0.151968	0.308424		0.184888	-0.0304387	0.140642	0.0937766	0.488673	0.309296
A0A0A0MTS7	TTN	S10463	TKVPEVSKKIVPQKPSRTPVQEEVIEVKVPA	Peptide1081		-0.195982	0.957363	0.255215	-0.048859	0.477435	0.00350051		-0.0470342	1.60484	-0.0285857	-0.00196	0.704819	-0.0686841		0.340818	0.47777	0.162118	0.165727	0.762163	0.123552		-0.0559332	1.04657	0.094295	0.121298	0.604482	0.0966268		0.16322	1.06026	0.187978	0.0993034	0.29445	0.208251		-0.0383029	0.965586	-0.141836	0.130759	0.3348	0.0334026		-0.177497	0.93728
A0A0A0MTS7	TTN	S12278	KVPEAPKEVVLEKKASVAVPKKPEAPRAKVP	Peptide1082		-0.878514	-0.931249	0.375343	0.202282	0.362279	0.378028																-0.0369904	-1.05193	0.672302	0.563895	-0.330292	-0.432051		-1.00404	-0.495386	0.697095	0.0381495	0.428772	-0.854997									0.275859	-0.446918
A0A0A0MTS7	TTN	S9944	EIKLSWYKGTEKLEPSDKFEISIDGDRHTLR	Peptide1083		0.305013	-1.32564	0.449807	0.292425	-0.128604	0.0768287																0.0632243	-0.624075	0.356469	-0.12625	-0.163373	-0.18872																0.0301085	-0.673649
A0A0A0MTS7	TTN	S12229	VPEKKLPEAIPPKPESPPPEVPEVLPPKEVV	Peptide1084		0.954243	-0.713708	1.01509	1.05145	0.691913	0.795872		0.557104	0.125425	0.725323	0.57126	0.652205	0.64202		0.705279	0.201778	0.814231	0.551688	0.551186	0.52453		0.534664	0.11698	0.970984	0.445586	0.581499	0.578383		0.493448	0.17671	0.907369	0.621253	0.503739	0.686667		0.69863	0.252309	0.865598	0.664611	0.605471	0.695644		0.491637	0.34513
A0A0A0MTS7	TTN	S8743	GSIALKAPPRFVKKLSDISTVVGKEVQLQTT	Peptide1085		0.620018	-0.298897	0.740157	0.658445	0.374489	0.472562		0.582779	0.147018	0.896251	0.400049	0.423969	0.516051		0.531802	0.0848029	0.48283	0.353324	0.511786	0.391213		0.557511	0.121185	0.857403	0.384377	0.4605	0.349653		0.465039	0.203273	0.676254	0.47297	0.472352	0.451412		0.435899	0.211157	0.653245	0.365201	0.416372	0.401783		0.376063	0.262864
A0A0A0MTS7	TTN	S8746	ALKAPPRFVKKLSDISTVVGKEVQLQTTIEG	Peptide1086									0.439795	0.24948	0.384658	0.10978	0.0243576	0.221114		0.735713	0.228684	0.019332	0.235295	0.363094	0.427442		0.279364	0.197362	0.412959	0.14734	-0.0646373	-0.0799377		0.195923	0.212819	0.244314	0.433075	-0.441294	0.0747541
A0A0A0MTS7	TTN	S7802	CSVKFKEPPRFVKKLSDTSTLIGDAVELRAI	Peptide1087		0.367362	-0.445477	0.551471	0.354268	0.189904	0.406296		0.293208	-0.460786	0.56548	0.153746	0.17291	0.316239		0.241884	-0.0288052	0.333397	0.192462	0.289545	0.19267		0.181034	-0.134598	0.378712	0.17737	0.182366	0.152881		0.253885	0.0351641	0.281924	0.137503	0.22249	0.199598		0.296761	0.167054	0.387541	0.291565	0.112416	0.218778		0.0667504	0.11168
A0A0A0MTS7	TTN	S6112	ATLFVKEPPQFIKKPSPVLVLRNGQSTTFEC	Peptide1088		0.218935	0.0462704	0.284064	0.286216	0.412992	0.121658		0.0225111	-0.000148782	0.339617	-0.0181875	0.146412	-0.0528632		0.247847	0.265964	0.429068	0.296699	0.428064	0.436143		0.197949	-0.00935161	0.25237	0.0667797	0.125253	0.0372927		0.206958	0.0297802	0.269303	0.117256	0.171274	0.175922		0.299455	0.200808	0.421765	0.260118	-0.0859745	0.0613157		0.113665	0.109655
A0A0A0MTS7	TTN	S7514	TASSSARLTAREPKKSPFFDIKPVSIDVIAG	Peptide1089		0.406036	-1.9125	0.497614	0.669921	-0.150639	0.333015		-0.0864077	-0.818847	0.605937	-0.0188036	0.272465	0.0422289									0.0520856	-0.991484	0.523499	-0.0113154	0.0473463	-0.168244									0.117206	-0.515187	0.600331	-0.0017189	0.196231	0.0345265		-0.542987	-0.463152
A0A0A0MTS7	TTN	S11956	IPEGETPIVKRRKTPSPTVPESPREIVPVKE	Peptide1090																							0.575212	-0.966442	0.652534	1.12895	-0.917395	-0.813127		-0.951301	-0.0758133	-0.0506867	0.905207	-0.0105661	-0.820902
A0A0A0MTS7	TTN	S4998	FVKKVDPSYLMLPGESARLHCKLKGSPVIQV	Peptide1091																0.0606513	-0.187179	0.110541	0.153348	0.0175143	0.158683		-0.282677	-0.0954395	-0.066613	-0.155861	-0.271354	-0.195584		-0.16103	-0.319753	-0.164624	-0.131259	-0.160175	-0.0127094		-0.0219961	-0.0392602	0.158841	-0.0313951	0.0727939	-0.123502		-0.0537936	-0.182258
A0A0A0MTS7	TTN	S11597	PTPVPKKVEAPPAKVSKKIPEEKVPVPVQKK	Peptide1092																0.321846	0.48685	-0.248819	-0.0525683	0.138236	0.113909		-0.113811	0.709859	0.211249	-0.226639	0.032945	-0.467824		-0.411537	0.918811	0.0947845	-0.360391	-0.237491	-0.317135
A0A0A0MTS7	TTN	S12480	VPEKKVPEAIPPKPESPPPEVPEVLPPKEVV	Peptide1093		0.66529	-0.610971	0.867682	0.75556	0.577511	0.611876		0.599976	0.219426	0.866474	0.403036	0.558181	0.630698		0.567838	0.153374	0.677345	0.438529	0.474762	0.440093		0.614945	0.0541976	0.938471	0.47306	0.46249	0.465727		0.525406	0.300309	0.830245	0.604332	0.309832	0.475327		0.558998	0.129622	0.721395	0.394504	0.421807	0.43586		0.467461	0.308062
A0A0A0MTS7	TTN	S9876	QEEETHRLEIEEIERSERDEKEFEELVSFIQ	Peptide1094		-0.146417	0.99599	-0.26645	-0.330039	0.912794	-0.383677		-0.395576	1.28865	0.230078	-0.601638	0.812093	-0.416366		-0.545025	0.54672	-0.149542	-0.330339	0.798165	-0.201567		-0.479066	1.18447	0.136782	-0.280416	0.929623	-0.440756		-0.362022	0.656493	-0.132345	-0.190576	1.08356	-0.268692		-0.454606	0.787173	-0.0719166	-0.453822	1.50518	-0.470233		-0.355467	0.999563
A0A0A0MTS7	TTN	S5552	LFVKEPATFVEKLEPSQLLKKGDATQLACKV	Peptide1095																0.556597	0.150834	0.69624	0.40582	0.365563	0.451123		0.0802398	-0.26568	0.199573	-0.0662432	0.00314282	-0.0699088		-0.00781852	-0.188117	0.284142	-0.107005	0.0639545	-0.0172634		0.309841	-0.0412094	0.434213	0.231128	0.296792	0.211013		0.00461704	-0.0424052
A0A0A0MTS7	TTN	S9702	PATKKAAVDGRLFFVSEPQSIRVVEKTTATF	Peptide1096																-0.150285	-0.0546707	-0.0884202	-0.0800186	0.700832	-0.0639856									-0.342076	-0.253753	-0.320192	-0.232238	0.151327	-0.0684154		-0.0275099	-0.0414166	-0.0736546	-0.0135571	0.829071	0.0738147		-0.419626	0.0184155
A0A0A0MTS7	TTN	S9706	KAAVDGRLFFVSEPQSIRVVEKTTATFIAKV	Peptide1097									-0.0807795	0.200465	0.0037884	0.0784693	0.0463248	0.0848197		-0.0375027	0.00862892	-0.131305	-0.00546104	-0.00906174	-0.0140649		-0.0405336	0.131626	-0.0694222	0.0728991	0.127711	-0.0366077		0.0201338	0.235781	-0.140392	0.0658044	0.0831233	-0.0454772		0.0302736	0.075485	-0.195469	-0.1166	0.416454	-0.00544116		-0.060452	0.188631
A0A0A0MTS7	TTN	S6990	PELSVEWYKDGKLLTSSQKHKFSFYNKISSL	Peptide1098		0.370758	0.0570208	0.625736	0.50174	0.344083	0.188924		0.25843	0.204279	0.497602	0.134994	0.374681	0.189236		0.367523	0.33992	0.519215	0.46853	0.609207	0.40612		0.337745	0.0805146	0.468242	0.339273	0.190344	0.281498		0.409148	0.122463	0.566246	0.246359	0.15069	0.475741		0.493911	0.215822	0.440529	0.282898	0.191889	0.27436		0.243182	0.290525
A0A0A0MTS7	TTN	S6991	ELSVEWYKDGKLLTSSQKHKFSFYNKISSLR	Peptide1099																							-0.0704993	-0.256607	-0.00119384	-0.110862	-0.109688	-0.120813		-0.32649	-0.328968	0.251806	-0.29262	0.00899016	-0.340647		0.0404116	-0.355697	-0.228382	-0.00461219	-0.0455016	-0.00783245
A0A0A0MTS7	TTN	S9122	YIKAPAKFVKRLNDYSIEKGKPLILEGTFTG	Peptide1100									0.484014	0.0507717	0.497107	-0.0892116	0.296918	0.125608		0.262926	-0.26548	-0.232461	-0.277791	-0.0509502	-0.146797		0.432556	-0.141269	0.503142	0.034898	0.09494	0.0470808		0.0652209	-0.0751197	0.288026	0.202222	0.102907	0.111493		0.0755073	-0.336164	0.0128631	0.0428575	0.225193	0.11277
A0A0A0MTS7	TTN	S7237	TRLFVKEPAAFLKRLSDHSVEPGKSIILEST	Peptide1101		0.529209	-0.210783	0.353146	0.399019	0.193698	0.332465		0.19442	-0.228992	0.154155	0.133248	-0.0317714	0.0801463		0.367244	-0.0913723	0.52308	0.218781	0.122195	0.0643742		0.0629364	-0.122017	0.279447	-0.00446468	0.246916	0.0979524		0.131211	0.00318088	0.206806	0.067858	0.137661	0.189096		0.341915	0.170336	0.458773	0.127339	0.370182	0.194075		-0.178146	0.127243
A0A0A0MTS7	TTN	S7240	FVKEPAAFLKRLSDHSVEPGKSIILESTYTG	Peptide1102		0.320512	-0.765608	-0.00739478	0.137314	-0.0855608	-0.165624																-0.0487649	-0.347428	0.303142	-0.297682	-0.126596	-0.0448119		-0.127655	-0.345187	0.313494	-0.151439	-0.00944326	-0.0244765									-0.390888	-0.223979
A0A0A0MTS7	TTN	S9500	NIKERLIPPSFTKRLSETVEETEGNSFKLEG	Peptide1103		0.309175	-0.516409	0.206606	0.321373	0.0586987	0.199917		0.0880376	-0.300098	0.279287	0.186442	0.396604	0.179981		-0.00515089	-0.48035	0.217318	0.0928862	0.161474	-0.0202966		-0.0467448	-0.18897	0.199106	0.0261122	0.26344	0.175727		0.174574	-0.0149001	0.00518405	0.076395	0.180535	0.177078		0.208991	0.195131	0.309708	-0.0135809	-0.00771303	0.117555		-0.0727914	-0.0553509
A0A0A0MTS7	TTN	S9510	FTKRLSETVEETEGNSFKLEGRVAGSQPITV	Peptide1104		0.419532	-0.278278	0.636761	0.519318	0.33729	0.526018		0.508165	0.0338992	0.775919	0.480034	0.382497	0.520102		0.279733	0.127019	0.587017	0.299484	0.524583	0.3316		0.408089	0.158892	0.71872	0.375395	0.355466	0.34413		0.482533	0.145167	0.663451	0.431439	0.33094	0.41972		0.42991	0.0759322	0.56136	0.307477	0.225736	0.465597		0.349314	0.184973
A0A0A0MTS7	TTN	S10719	KTVVEEKRFVAEEKLSFAVPQRVEVTRHEVS	Peptide1105		-0.659806	-0.650295	0.355093	-0.411848	-0.192799	0.0160677		0.0922112	-0.373688	0.165118	-0.0702886	-0.0151143	-0.805181									-0.380157	-0.475241	0.167406	-0.240676	0.266776	-0.536475		-0.203797	-0.477398	-0.0292836	-0.456874	0.314722	-0.536931		-0.540636	0.0442992	-0.434144	0.110345	0.204727	-0.594699		-0.498568	-0.0453897
A0A0A0MTS7	TTN	S9895	EKEFEELVSFIQQRLSQTEPVTLIKDIENQT	Peptide1106		-0.867752	0.312137	-0.279989	-0.828366	1.43254	-0.783538		-0.635259	1.58042	-0.687578	-0.916192	0.93827	-0.879826		-0.198503	1.22465	-0.506028	-0.546855	0.796781	-0.543037		-0.965023	0.694898	-0.911288	-0.0740692	1.40793	-0.655637		-0.794867	0.512398	-0.614625	-0.562973	0.326581	0.768589		-0.678555	0.340611	-0.621921	-0.215466	0.583595	-0.733339		-0.381084	0.216009
A0A0A0MTS7	TTN	S9981	KDQGNYRLVCGPHIASAKLTVIEPAWERHLQ	Peptide1107		0.0066402	-1.19154	-0.0959316	0.271944	-0.141806	0.220751		-0.124786	-0.760854	0.327009	0.145171	-0.201722	-0.209049																							0.252593	-0.179528	0.160669	-0.0325554	-0.513857	-0.106861		-0.46918	-0.222867
A0A0A0MTS7	TTN	S10495	HTKKMVISEEKMFFASHTEEEVSVTVPEVQK	Peptide1108		-0.148648	0.0170776	-0.358274	-0.423598	0.21911	-0.0360468		0.0952389	-0.326002	0.262118	0.0551271	0.353848	-0.0484609		0.0564108	-0.601443	-0.403152	-0.247105	0.0864137	-0.530836		-0.0550097	0.0995853	-0.229438	-0.0662548	0.520027	-0.138036		-0.14672	-0.185913	-0.0763608	-0.0912914	0.381251	-0.23898		-0.129899	-0.0986826	-0.325223	-0.219561	0.616916	-0.408755		-0.118242	0.507083
A0A0A0MTS7	TTN	S6190	TYVCEARNDAGTASCSIELKVKEPPTFIREL	Peptide1109		-0.119012	-1.63765	0.224863	0.00273542	-0.322545	-0.0844503		0.0376763	-0.355931	0.630105	0.231221	0.0836171	0.345464																														-0.476625	-0.316037
A0A0A0MTS7	TTN	S9155	PISVTWKKNGINVTPSQRCNITTTEKSAILE	Peptide1110																																												-0.688084	-0.300063
A0A0A0MTS7	TTN	S9538	ITVAWYKNNIEIQPTSNCEITFKNNTLVLQV	Peptide1111		0.221491	-0.19058	-0.0428213	0.113094	-0.0367879	0.207141																-0.0379093	-0.400183	0.129669	-0.18009	-0.482937	-0.11222		-0.412866	-0.51738	0.320242	-0.327581	0.00472115	-0.298557		0.122446	-0.31643	0.0936348	0.0241009	0.110357	0.233484
A0A0A0MTS7	TTN	S8320	RSAPAYKMQFKNNVASLVINKVDHSDVGEYS	Peptide1112		-0.263638	-0.824161	-0.53449	-0.565122	-0.504067	-0.285935		0.0775605	-0.577684	0.322804	0.255021	-0.197313	0.156475
A0A0A0MTS7	TTN	S6452	NNVASFRIQSVMKQDSGQYTFKVENDFGSSS	Peptide1113		0.370821	-0.606543	0.202674	0.334433	0.0372834	0.280029		0.416417	0.121408	0.503255	0.572166	0.531985	0.595666									0.232642	-0.147876	0.566993	0.212656	0.560595	0.384183		0.336005	-0.226153	0.737905	0.208825	0.282952	0.387552		0.315744	-0.313224	0.258313	0.159774	0.248652	0.277938		0.121205	-0.0554821
A0A0A0MTS7	TTN	S9381	SLAGQYSCTATNPIGSASSSARLILTEGKNP	Peptide1114		-0.410445	-0.513406	-0.209895	-0.143033	-0.139379	-0.0183975		-0.217423	-0.591446	0.0150822	-0.285207	-0.137783	-0.0548787		-0.41439	-0.229687	-0.486632	-0.44544	-0.0878383	-0.414958		-0.2148	-0.406362	-0.174385	-0.152986	-0.310821	-0.14011																-0.31712	-0.526975
A0A0A0MTS7	TTN	S4803	TVTEAYPPTFLSRPKSLTTFVGKAAKFICTV	Peptide1115		0.24096	0.23364	0.379344	0.222389	0.205387	0.183935		0.24609	0.304716	0.475274	0.138179	0.0982054	0.30274		0.294503	0.238971	0.310667	0.401602	0.441236	0.196902		0.329502	0.228888	0.299575	0.264328	0.213731	0.25187		0.252089	0.28022	0.350639	0.22425	0.20401	0.305658		0.252034	0.295325	0.178902	0.254469	0.15361	0.169311		0.360664	0.302873
A0A0A0MTS7	TTN	S7970	DKGLYSFEVKNSVGKSNCTVSVHVSDRIVPP	Peptide1116									0.0484362	-0.309924	-0.169933	-0.167317	-0.28547	-0.195032									-0.249588	-0.407813	-0.512637	-0.37804	-0.43007	-0.254664
A0A0A0MTS7	TTN	S7979	KNSVGKSNCTVSVHVSDRIVPPSFIRKLKDV	Peptide1117		-0.0329681	0.167137	0.106434	0.142507	0.0513041	0.110527		0.073545	-0.157141	0.0367616	-0.193439	-0.277857	-0.05772		0.32222	0.0992166	0.130629	0.161099	0.117696	0.0750007		0.161728	-0.11028	-0.0537823	-0.0125775	-0.158044	-0.0673618		0.0642506	-0.0451677	0.0805447	-0.0464195	0.0144001	-0.0824216		0.337789	0.0440427	0.0340412	0.0316476	-0.104106	0.0980272		0.0297292	-0.0604755
A0A0A0MTS7	TTN	S7038	QNNVGKSSCTAVVDVSDRAVPPSFTRRLKNT	Peptide1118																							0.0904933	0.209807	0.100425	0.115921	-0.0756003	0.0820043		0.0960133	-0.0846648	0.00698932	-0.113401	0.148164	0.0722404									-0.0605474	-0.23346
A0A0A0MTS7	TTN	S6465	QDSGQYTFKVENDFGSSSCDAYLRVLDQNIP	Peptide1119																														-0.495722	-0.444449	-0.164343	-0.411522	-0.109791	-0.154134									-0.439592	-0.718058
A0A0A0MTS7	TTN	S6466	DSGQYTFKVENDFGSSSCDAYLRVLDQNIPP	Peptide1120		-0.288578	-0.549494	-0.158171	-0.418669	-0.277926	-0.21824		0.105263	0.0633644	0.190197	0.171297	-0.0818342	0.120029																-0.118994	-0.29065	0.0758735	0.0687739	-0.151512	-0.0535555
A0A0A0MTS7	TTN	S6467	SGQYTFKVENDFGSSSCDAYLRVLDQNIPPS	Peptide1121		-0.165807	-0.628401	-0.335998	-0.361541	-0.235205	-0.177055
A0A0A0MTS7	TTN	S7390	NNVATLVFNKVNINDSGEYTCKAENSIGTAS	Peptide1122		-0.411491	-0.55347	-0.193583	-0.344289	-0.183911	-0.187758		0.637386	0.223864	0.541962	0.106117	-0.134125	0.484958									0.261154	0.132025	0.254296	0.0636614	-0.135288	0.140346		-0.102827	-0.0326408	0.140914	-0.0193692	0.0320475	-0.0754811
A0A0A0MTS7	TTN	S6565	NYTCKVSNVAGDDACSGILTVKEPPSFLVKP	Peptide1123									0.377043	0.0885231	0.399473	0.284596	0.04613	0.408935		0.669783	-0.0762554	0.500592	0.436412	0.134708	0.379183		0.354133	0.11812	0.542552	0.297116	0.0977552	0.268666		0.282724	0.0055992	0.484557	0.279679	0.218473	0.329076		0.314475	-0.0978904	0.223344	0.224835	0.367822	0.386345		-0.0334775	0.326542
A0A0A0MTS7	TTN	S5731	GSSICSARVTLREPPSFIKKIESTSSLRGGT	Peptide1124									0.0358722	-0.375139	0.100986	-0.144909	-0.039603	0.0356845									-0.0226973	-0.644222	-0.190092	-0.317213	-0.402123	-0.169327
A0A0A0MTS7	TTN	S5717	ADAGEYQCRVTNEVGSSICSARVTLREPPSF	Peptide1125		-0.346091	0.093656	-0.42775	-0.262569	-0.17356	-0.292976																0.0374167	0.0669554	-0.0617071	-0.0456423	-0.345563	0.0558788		-0.132431	-0.153516	0.127523	-0.261685	0.0154891	-0.151908									-0.235731	-0.101877
A0A0A0MTS7	TTN	S5718	DAGEYQCRVTNEVGSSICSARVTLREPPSFI	Peptide1126		-0.20747	0.42643	-0.193098	-0.132053	0.00565108	-0.168656									0.309861	0.203062	-0.0829098	0.163106	-0.252881	0.0871395		0.0436015	-0.0380899	-0.0255047	-0.0737192	-0.030616	-0.0235318		-0.105822	-0.0719983	0.102508	-0.0956999	-0.0604142	-0.00364605									-0.0880441	0.00985325
A0A0A0MTS7	TTN	S5721	EYQCRVTNEVGSSICSARVTLREPPSFIKKI	Peptide1127																																												-0.392462	-0.42858
A0A0A0MTS7	TTN	S10068	EDQGQYTCKYEDLETSAELRIEAEPIQFTKR	Peptide1128																																												-0.594772	-0.255491
A0A0A0MTS7	TTN	S6432	KWLKDGKQIVPSRYFSMSFENNVASFRIQSV	Peptide1129																-0.0480354	-0.0732892	-0.20066	-0.0798025	0.0420524	0.19236		-0.509345	-0.42482	-0.402327	-0.501841	-0.271652	0.637988		-0.461107	-0.17997	-0.305581	-0.367571	-0.344485	0.244296
A0A0A0MTS7	TTN	S6434	LKDGKQIVPSRYFSMSFENNVASFRIQSVMK	Peptide1130		-0.28833	-1.02406	-0.381384	0.00908739	0.155635	0.162189		-0.455474	-0.923118	-0.100316	-0.0699588	-0.511561	0.130011																							-0.270786	-0.20928	-0.206759	-0.428145	0.0108194	0.0729039		-0.62767	-0.417734
A0A1B0GWJ0	ADSL	S151	ARVISRLADFAKERASLPTLGFTHFQPAQLT	Peptide1131									-0.104943	-0.309086	0.174141	0.154527	0.214168	0.0720551		-0.497609	-0.369685	-0.20531	-0.402306	-0.108007	-0.210007									-0.223223	-0.134523	-0.040205	-0.0879254	-0.200085	0.357369		-0.141529	-0.444669	-0.0645728	0.142904	0.00623131	0.136983		-0.249742	-0.106486
A0A1B0GWJ0	ADSL	S207	DLRFRGVKGTTGTQASFLQLFEGDDHKVEQL	Peptide1132									-0.0329468	-0.357161	0.116198	0.106848	0.237924	-0.0263307									-0.272116	-0.615447	0.00117451	-0.0372603	0.0385186	-0.0195079									-0.10809	-0.570273	0.0392534	-0.177577	-0.25102	-0.112388		-0.493951	-0.445345
A0A1B0GWJ0	ADSL	S334	LQTASVQWFERTLDDSANRRICLAEAFLTAD	Peptide1133																0.131323	0.27056	0.0812325	0.137845	0.0972701	0.155697		-0.147958	-0.130513	-0.228566	-0.104695	-0.334708	-0.353157		-0.191445	0.056009	-0.0331942	-0.184476	-0.3995	-0.16615									-0.209304	-0.0634919
A0A0A6YYC7	ZFP91-CNTF	S82	AVSRRRKAEYPRRRRSSPSARPPDVPGQQPQ	Peptide1134																							0.0633121	-0.80955	0.199155	-0.135175	-0.54057	-0.489675																-0.317419	-0.959905
A0A0A6YYC7	ZFP91-CNTF	S83	VSRRRKAEYPRRRRSSPSARPPDVPGQQPQA	Peptide1135		0.123518	-0.319036	0.307545	-0.170795	-0.220996	-0.0907158									0.481108	0.0931364	0.303789	0.249387	0.11631	0.362715		0.0562692	-0.75662	0.139007	-0.178096	-0.826015	-0.697347
A0A0A6YYC7	ZFP91-CNTF	S101	ARPPDVPGQQPQAAKSPSPVQGKKSPRLLCI	Peptide1136																0.00579111	-0.246678	-0.182545	-0.225201	-0.144261	-0.103617		0.225257	0.121791	0.220791	-0.117453	-0.21695	-0.418581		-0.0341124	-0.140272	-0.00380336	-0.032321	0.322797	-0.463835
A0A0A6YYC7	ZFP91-CNTF	S103	PPDVPGQQPQAAKSPSPVQGKKSPRLLCIEK	Peptide1137																0.0475393	-0.121474	0.428902	0.155001	0.287242	0.311446																							-0.360079	-0.431794
H7BYZ6	GPR75-ASB3	S28	EGNVKVLRKLLKKGRSVDVADNRGWMPIHEA	Peptide1138																							-0.575517	-0.0545828	-0.433733	-0.598938	0.596273	-0.476779		-0.246105	0.190484	-0.644971	-0.607275	0.169247	-0.505302									-0.554975	0.137485
H7C446	PPAN	S119	RKKSLEGMKKARVGGSDEEASGIPSRTASLE	Peptide1139		0.13905	-0.593118	0.256	0.250093	0.162726	0.0655002									-0.0648777	-0.0880523	0.526224	0.118059	0.0808146	0.355567																							-0.342339	-0.645865
A0A286YES6	MACF1	S802	LNVASSEGGEMERRDSDSFLNIFPEKQVTKA	Peptide1140									0.303641	0.371014	0.1328	0.115278	0.480571	0.263408		0.226707	-0.250389	-0.00898024	-0.141818	0.229413	-0.253211		0.319812	0.188033	0.47998	0.250175	0.31718	0.0151773		0.186393	0.100469	0.0659729	0.25882	0.228853	0.116396		0.0885832	0.0662105	0.0325468	-0.0792152	0.806293	-0.127685		0.373109	0.312743
A0A0C4DFM5	MYOT	S260	EKFYPPRFIQVPENMSIDEGRFCRMDFKVSG	Peptide1141		-0.310868	-0.505198	-0.251923	-0.0281937	0.149494	0.294899									-0.103494	-0.0115027	0.0419232	-0.0299886	0.165229	0.168783		-0.391307	-0.767305	-0.0955979	-0.31974	-0.706467	-0.193496
A0A0C4DFM5	MYOT	S53	SSIIIQPRQCTEQRFSASSTLSSHITMSSSA	Peptide1142																																					-0.211873	-0.405301	-0.434775	-0.201047	-0.138329	-0.361862
A0A0C4DFM5	MYOT	S56	IIQPRQCTEQRFSASSTLSSHITMSSSAFPA	Peptide1143									0.186289	-0.0801703	-0.0245634	-0.0424374	0.038013	0.254577		-0.144681	0.167121	-0.26604	-0.00593837	-0.137901	0.116473									0.173317	0.130113	-0.201759	0.177593	-0.198383	-0.105523									0.0648937	0.126903
A0A0C4DFM5	MYOT	S65	QRFSASSTLSSHITMSSSAFPASPQQHAGSN	Peptide1144																														-0.918565	-1.43441	-0.246051	-0.696377	-0.0984808	0.827996		-0.333933	-0.473005	-0.369482	-0.211484	-0.038862	-0.0742963
A0A0C4DFM5	MYOT	S66	RFSASSTLSSHITMSSSAFPASPQQHAGSNP	Peptide1145																							-0.742258	-1.34577	-0.553817	-0.529196	-0.482789	0.727037									-0.475878	-0.839592	-0.27874	-0.356714	0.253642	0.193267		-0.607831	-1.59306
A0A0C4DFM5	MYOT	S67	FSASSTLSSHITMSSSAFPASPQQHAGSNPG	Peptide1146		-0.589012	-1.15181	-0.653163	-0.875619	0.678228	0.720778																-0.125135	-0.49541	-0.246281	-0.363319	-0.365929	-0.00908215		-0.627679	-1.01922	-0.648056	-0.451767	-0.000553851	0.623988
A0A0C4DFM5	MYOT	S72	TLSSHITMSSSAFPASPQQHAGSNPGQRVTT	Peptide1147		-0.20893	-0.596123	-0.0465803	-0.166866	0.671992	0.553158		-0.281173	-0.553029	-0.00624968	-0.15763	0.0434451	0.52659		-0.176251	0.1155	-0.0615974	-0.14303	-0.20933	0.37307		-0.219024	-0.538949	-0.170948	-0.0874642	-0.0042697	0.865029		-0.209931	-0.641874	-0.289538	-0.109458	-0.00385078	1.07456		-0.0888709	-0.42238	-0.00764322	0.0336038	0.25235	0.519978		0.0102127	-0.637312
A0A0C4DFM5	MYOT	S19	YERPKHFIQSQNPCGSRLQPPGPETSSFSSQ	Peptide1148																0.0900803	-0.155972	-0.16367	-0.251773	-0.297952	0.0162531		-0.179573	-0.0561405	-0.151702	-0.37444	-0.152121	0.171356		-0.254789	-0.321396	-0.269181	-0.284513	-0.114367	0.162463
A0A0C4DFM5	MYOT	S118	SQPDYNSSKIPSAMDSNYQQSSAGQPI KP	Peptide1149		-0.0099961	0.205733	-0.0791182	-0.460561	0.370222	-0.065391									0.787772	0.00757867	0.373914	0.38283	0.244586	0.553152									-0.51117	-0.264302	-0.07496	0.0423305	-0.59306	0.74779
A0A0C4DFM5	MYOT	S123	NSSKIPSAMDSNYQQSSAGQPI KPSQTAN	Peptide1150		0.132776	-0.0736051	0.0837479	-0.160248	0.220487	0.472803		0.277896	0.251402	0.276619	0.299406	0.00439621	0.649747		0.41176	-0.115507	0.192654	0.0225518	-0.190375	0.604349		0.11733	0.142872	0.404122	0.0178141	-0.0778654	0.906308		0.158962	-0.0922869	0.20462	0.245968	-0.290306	1.01352									0.171701	0.305834
A0A0C4DFM5	MYOT	S134	NYQQSSAGQPI KPSQTA KPIPRTPDHE	Peptide1151																																												-0.670988	0.222025
A0A0C4DFM5	MYOT	S495	EGEFQRLAAQSGLYESEEL____________	Peptide1152																																												-0.651292	-0.347416
A0A0C4DFM5	MYOT	S205	LGPQ AAVFQAQDDSGAQDSQQHNSEHARL	Peptide1153		-0.0374347	-0.387047	-0.0999733	-0.00664685	0.0914528	0.0543725									-0.107687	-0.274892	0.0617281	0.0482899	0.146629	-0.00902083		-0.318563	-0.810342	-0.509865	-0.21592	-0.443215	-0.175124									-0.157322	-0.120371	-0.0262409	-0.0183653	0.198886	-0.203178		-0.392943	-0.612064
A0A0C4DFM5	MYOT	S210	AAAVFQAQDDSGAQDSQQHNSEHARLQVPTS	Peptide1154		-0.212751	-0.00324072	-0.0764696	-0.0611795	0.345964	0.186341		-0.186342	-0.130198	-0.0666104	-0.0526992	0.11104	0.26105		0.0455339	-0.191096	0.0753207	-0.0217792	-0.00895144	0.175822		-0.197202	-0.00783304	-0.101209	-0.0737776	0.0657294	0.354474		-0.115129	-0.00448537	-0.045646	-0.176032	-0.0374329	0.402405		-0.0910113	0.00120391	-0.00430865	-0.000992112	0.220629	0.124644		0.229164	-0.12317
A0A0C4DFM5	MYOT	S29	QNPCGSRLQPPGPETSSFSSQTKQSSIIIQP	Peptide1155		-0.142294	-1.18367	-0.316962	-0.239118	0.664131	-0.0239049		-0.0278156	-0.675658	0.0972917	0.147818	0.320548	-0.0163177									-0.374544	-0.664892	-0.0207728	-0.24369	0.571073	0.0476984									-0.261124	-0.176966	-0.195663	-0.44053	0.393008	-0.2644		-0.0592488	-0.402441
A0A0C4DFM5	MYOT	S30	NPCGSRLQPPGPETSSFSSQTKQSSIIIQPR	Peptide1156																-0.0707289	-0.527792	0.0214479	-0.124075	0.194512	-0.312538																							-0.560398	-0.409397
A0A0C4DFM5	MYOT	S225	SQQHNSEHARLQVPTSQVRSRSTSRGDVNDQ	Peptide1157									-0.7705	-0.118266	-0.307265	-0.33606	-0.235333	-0.290041																														-0.778856	0.0101554
A0A0C4DFM5	MYOT	S39	PGPETSSFSSQTKQSSIIIQPRQCTEQRFSA	Peptide1158		0.117034	-0.0614302	-0.11091	0.295171	0.309686	0.482251		0.963019	0.388631	0.750173	0.520816	-0.177485	0.136024		0.541702	0.0118287	0.203806	-0.0726217	-0.192201	-0.0360775		0.305007	0.201007	0.74304	0.167532	0.136069	0.477392		0.599493	0.247419	0.39895	0.127244	0.209609	0.25662									0.438505	0.548077
A0A0C4DFM5	MYOT	S231	EHARLQVPTSQVRSRSTSRGDVNDQDAIQEK	Peptide1159		-0.141944	-0.0816518	0.423782	-0.305644	0.16646	-0.0810826		0.492641	0.629087	0.354651	-0.188298	-0.076023	0.246975		0.480288	0.968692	-0.147572	-0.115887	-0.16764	-0.0423743		0.4622	0.208446	0.40074	0.499768	-0.287647	-0.0247523		0.244966	0.267659	0.242178	0.438711	-0.478722	0.265138
A0A0C4DFM5	MYOT	S233	ARLQVPTSQVRSRSTSRGDVNDQDAIQEKFY	Peptide1160		0.766213	-0.0611727	0.876701	0.78358	0.140731	0.539302		0.380348	0.590169	0.31351	0.616859	0.210873	0.646901		0.793955	0.501554	0.53193	0.546941	0.204293	0.347011		0.517459	0.0667213	0.691	0.661525	0.2079	0.466968		0.709468	0.363653	0.554566	0.7598	-0.305248	0.760288		0.549473	0.231142	0.821364	0.765631	0.362888	0.299435		0.30236	0.299431
A0A0C4DFM5	MYOT	S153	KPIPRTPDHEIQGSKEALIQDLERKLKCK	Peptide1161																0.889497	-0.368256	0.65794	0.422028	0.217813	0.443691		0.601888	-0.394545	0.782176	0.154552	-0.0139594	-0.180963		0.298132	-0.573283	0.579536	0.268607	0.0480187	0.204054									0.120919	-0.342006
A0A0C4DFM5	MYOT	S292	PAPDVSWYLNGRTVQSDDLHKMIVSEKGLHS	Peptide1162		-0.00585539	-1.18407	-0.0568867	-0.176053	-0.135518	0.0384684																																					-0.785263	-0.428792
A0A0C4DFM5	MYOT	S461	QTLPAPKQLRVRPTFSKYLALNGKGLNVKQA	Peptide1163		0.816878	-1.82888	0.474265	0.797512	-0.741791	0.779796		0.505658	-1.07756	0.325129	1.10682	0.157693	0.527503		0.64886	-1.23369	0.915014	-0.106599	-0.594052	-0.374869		0.565785	-0.681593	0.959519	0.113243	-0.403277	-0.369519		1.0124	-0.964816	1.08485	0.522895	-0.76097	-0.142459		0.453575	-0.324481	0.508915	0.714766	-0.893091	0.273861		0.268691	-0.195048
A0A0C4DFM5	MYOT	S92	AGSNPGQRVTTTYNQSPASFLSSILPSQPDY	Peptide1164		0.647645	-2.33007	0.77126	0.560385	0.413919	0.478533		-0.0743392	-2.26039	-0.276447	0.758885	-0.01891	0.654548		0.4098	-1.18335	0.569237	0.33058	-0.191358	0.0910422		0.0794949	-1.40767	0.254414	-0.179213	-0.160314	0.242027		0.0396697	-1.33761	0.556951	0.20461	-0.565108	0.34357		0.210408	-1.23798	0.665419	0.598788	0.172733	0.230214		-0.0649872	-1.07118
A0A0C4DFM5	MYOT	S95	NPGQRVTTTYNQSPASFLSSILPSQPDYNSS	Peptide1165																0.284862	-0.371767	-0.12298	-0.199963	-0.127161	0.0999408		0.132776	-1.57291	0.183137	-0.200471	-0.464906	-0.0758116		-0.670459	-0.798032	-0.198524	-0.478285	-0.283058	0.309601		-0.120731	-0.543092	-0.360262	-0.332106	0.576849	0.157494
G3XAC1	SLC26A6	S509	AASPKGASVSINVNTSLEDMRSNNVEDCKMM	Peptide1166									-0.326601	-0.579605	-0.201693	-0.411763	-0.248101	-0.370174		-0.634294	-0.411393	-0.518205	-0.537749	-0.349724	-0.378936
G3XAC1	SLC26A6	S644	DAVTFALQHPRPVPDSPVSVTRL________	Peptide1167																0.0161912	-0.0130133	-0.0494095	-0.0357108	-0.103177	-0.0185818									-0.363453	-0.369068	-0.33295	-0.442969	-0.256572	-0.0428584
A0A2R8YCY2	FRY	S2599	GEEKGNRALDQFTLASFGEGDRGVSPPPSPF	Peptide1168																																												-0.327968	-0.312946
A0A2R8YCY2	FRY	S2758	TLSWLANCKATFAGGSRDGVITCQPGDSEEK	Peptide1169																-0.00874786	0.309467	0.095232	0.126659	-0.00756825	0.0285443									0.00410698	0.148228	-0.0635729	0.0882244	-0.976683	-0.11809									0.121465	-0.212971
A0A2R8YCY2	FRY	S1886	NLSDCLKNSDLLTVLSRSSSPDLSSSSKLTA	Peptide1170																							0.0375816	-0.558945	0.0426315	-0.016243	-0.256483	-0.165874		-0.261416	-0.570097	0.127929	-0.115005	-0.0747862	-0.0796118		-0.154097	-0.569934	0.128811	0.247462	0.135994	-0.3524		0.073514	-0.917258
A0A2R8YCY2	FRY	S1890	CLKNSDLLTVLSRSSSPDLSSSSKLTASRKS	Peptide1171																-0.02844	-0.000919759	0.300902	0.066188	0.0601143	0.0702025		0.334176	-0.286534	0.220118	0.134171	0.14505	-0.230795		0.281141	-0.0701896	0.24826	0.22921	-0.520437	0.0488363									0.436655	-0.603025
A0A2R8YCY2	FRY	S1905	SPDLSSSSKLTASRKSTGQLNMNPGTTSGNT	Peptide1172																							-0.077298	0.211234	0.206191	0.203169	-0.208516	-0.11452		-0.131726	0.0550732	0.0290723	0.112551	-0.216244	0.163107
J9JIE0	GPRC5C	S68	SVYQPTEMALMHKVPSEGAYDIILPRATANS	Peptide1173																-0.0851548	-0.00633463	-0.167141	-0.134599	0.298728	-0.19764									-0.197027	-0.0362813	0.0713304	-0.322765	0.282398	-0.161556									0.0463332	0.0721488
A0A0C4DG33	PEX1	S1159	SIIKGRYRSQSGEDESMNQPGPIKTRLAISQ	Peptide1174																																												-0.504197	0.0845631
E7ENN3	SYNE1	S7900	DLSRDLESAMSRALPSEDEEGQDDKDFYLRG	Peptide1175		0.60548	0.140593	0.703302	0.336785	0.0954303	0.196125									0.412863	0.350954	0.706363	0.586084	0.0805652	0.454166		0.265747	0.0581437	0.376774	0.301263	0.0142577	0.171837		0.118812	-0.0970185	0.459701	0.11018	0.288743	0.0996988									0.0574515	5.24653e-05
E7ENN3	SYNE1	S7818	KKLIRLPLPDDEHDLSDRELELEDSAALSDL	Peptide1176		0.30393	0.139738	0.397758	0.152714	-0.0288941	0.271519		0.0993732	-0.0348188	0.093928	0.143141	0.0451861	0.157484		0.19901	-0.0931291	0.217531	0.316646	-0.0800527	-0.007756		0.253406	0.104454	0.248563	0.31235	-0.0564728	0.0453519		0.105563	-0.0477454	-0.0372632	0.187809	0.317853	0.0767783		0.181006	0.256157	0.264897	0.190405	0.442144	0.0455673		0.107609	0.00615471
E7ENN3	SYNE1	S5825	WLAQARTTWTQQRQSSLQQQKELEQELAEQK	Peptide1177																-0.400582	0.0476157	-0.00243852	-0.505083	0.489468	-0.41468									-0.268221	-0.208147	-0.373738	-0.398937	1.05856	-0.151237									-0.00264103	-0.264096
A0A0U1RQY6	RABGAP1L	S119	ILDPSNTEISTPRPSSPGGLPEEDSVLFNKL	Peptide1178																																					-0.130917	-0.686824	0.380312	-0.00858888	0.697451	-0.230565		-0.52332	-1.21842
F5GYV5	ARL6IP4	S140	QVEALPGPSLDQWHRSAGEEEDGPVLTDEQK	Peptide1179		0.423177	0.0577974	0.595429	0.531667	0.291238	0.129446		0.93107	1.20047	1.09691	0.536013	0.554929	0.561772		0.444709	0.467832	0.468323	0.184394	0.247868	0.22714		0.783353	0.997054	0.940549	0.620196	0.576306	0.178572		0.569855	0.799986	0.756816	0.716279	0.43061	0.459333									0.825891	0.440972
A0A0C4DGG1	PACSIN3	S383	VRALYDYAGQEADELSFRAGEELLKMSEEDE	Peptide1180		-0.104908	0.108409	0.163909	0.0908458	0.00683346	0.00380999		-0.0136287	0.0185472	-0.0821927	-0.0406708	9.12011e-05	-0.10757		-0.301264	-0.155638	-0.0230793	0.017782	0.123448	-0.0133531		-0.0537234	0.00895991	-0.0569856	0.0474778	0.0450064	0.0180862		-0.0652726	-0.122616	0.100097	-0.114595	0.28867	-0.135408		0.00167137	0.0213268	-0.0480593	0.125118	0.360575	0.0669984		-0.316563	-0.149719
A0A0C4DGG1	PACSIN3	S354	PQSPGSPGTGQDEEWSDEESPRKAATGVRVR	Peptide1181		0.100391	0.0827065	0.468813	0.331419	0.23353	0.342382									0.259642	0.240891	0.473299	0.491698	0.396447	0.418515		0.235425	0.136389	0.347243	0.272759	0.122517	-0.127289		0.214695	0.0432554	0.387302	0.118149	0.449942	-0.326459									0.0438164	-0.0864464
A0A0C4DGG1	PACSIN3	S276	FHELHRDLHQGIEAASDEEDLRWWRSTHGPG	Peptide1182		0.190168	-0.13361	0.281209	0.234079	0.146413	0.231063		0.133991	-0.0187721	0.163165	0.000742588	0.0696795	0.0517935		-0.00424583	-0.0537712	0.0367383	0.0130199	0.1154	-0.0106583		0.133146	-0.0136143	0.102265	0.182529	0.0983864	0.168219		0.0111458	-0.0637542	0.109815	-0.085486	0.383518	0.160319		0.193931	0.176143	0.212772	0.138124	0.334015	0.142717		0.0304056	-0.0795723
A0A0C4DGG1	PACSIN3	S319	LDTQRTISRKEKGGRSPDEVTLTSIVPTRDG	Peptide1183		-0.0905614	0.419874	-0.025316	-0.0906845	0.148411	0.375046		0.0631773	-0.0963109	0.327045	-0.0645114	-0.218222	0.33142		-0.213323	0.10175	-0.0697487	0.0657428	0.0293331	0.272641		0.00573573	0.122507	-0.136757	0.00875026	-0.124503	0.973038		-0.268889	-0.208917	-0.272668	-0.235514	0.467357	0.930703		-0.0230795	0.19007	-0.0276836	-0.141041	0.609037	0.192502		-0.0230495	0.0661948
Q14839-2	CHD4	S428	HCEKEGIQWEAKEDNSEGEEILEEVGGDLEE	Peptide1184																0.217755	-0.089545	0.384434	0.17619	0.21078	0.221176									-0.153901	-0.385381	0.0684432	-0.125861	0.30016	-0.0608174		0.151209	0.164784	0.599526	0.379577	0.852702	0.225477		-0.170212	-0.214001
Q14839-2	CHD4	S1563	ELAEVEENKKMSQPGSPSPKTPTPSTPGDTQ	Peptide1185																0.234877	0.143344	0.438916	0.117513	-0.167872	0.0930355		0.402061	0.0740421	0.385533	0.201142	0.17153	0.137844		0.121184	0.0153467	0.312107	0.111602	0.389784	0.0483605									0.508252	-0.076119
O75390	CS	S190	LNSESNFARAYAQGISRTKYWELIYEDSMDL	Peptide1186		0.127497	0.202086	-0.0607625	0.186166	0.164728	-0.0396711									0.233072	0.251521	0.314426	0.123964	0.0538564	0.0844507		0.0271259	0.129807	-0.0693673	0.0190611	-0.0147226	0.110685		0.148876	0.203488	0.133664	-0.0398635	-0.0899895	0.065246									-0.0268199	0.304867
A0A0C4DGM5	ZNF106	S555	LRKKKSLRAAHVPENSDTEQDVLTVKPVRKV	Peptide1187									0.0238439	-0.0100092	0.194654	0.26304	0.289306	0.283971																-0.0207034	-0.243328	0.102453	-0.159865	0.393891	0.131764		0.017082	-0.196133	-0.0733116	-0.0918382	0.425668	0.104251		-0.273392	0.0299662
A0A0C4DGM5	ZNF106	S464	LKFSVEQRNTRNRENSPSSQSAGLSSINKEG	Peptide1188																																												-0.585134	-0.547867
A0A0C4DGM5	ZNF106	S513	RLSFASETPLEKEPHSPADQPEQQAESTLTS	Peptide1189									0.0839588	0.0598184	0.405409	0.26928	0.20285	0.254828																-2.2237e-05	-0.374803	0.268645	0.0338575	-0.0258448	0.160201									-0.207593	-0.196265
A0A0C4DGQ6	RPRD1A	S156	EQIKVDENENCSSLGSPSEPPQTLDLVRALQ	Peptide1190																														-0.568411	-0.608478	-0.169867	-0.30312	0.25542	-0.233588		-0.228338	-0.218361	-0.397498	0.312891	0.969016	0.20306
U3KQ84	DDOST	S144	ADTENLLKAPTIVGKSSLNPILFRGV_____	Peptide1191									-0.108676	-0.412183	0.0539755	-0.105058	0.0774691	0.0144152									-0.186374	-0.51193	-0.240003	-0.135585	-0.17971	-0.048858									-0.232229	-0.398277	-0.0708499	-0.0709915	0.0099602	-0.30242		-0.430723	-0.650378
A0A0C4DGT3	IQSEC1	S803	SYASGEGLKRSALSSSLRDLSEAGVHH____	Peptide1192		0.301062	0.181795	0.0457093	0.0771045	-0.00108236	0.0750241									0.115547	0.0364145	0.318321	0.165902	0.0610795	0.270839									-0.0488261	-0.118461	0.0703626	-0.0913014	0.0567577	-0.0145192									0.373259	-0.13627
E5RG30	SNX16	S29	NSASSFTTNRNQRSSSFGSVSTSSNSSKGQL	Peptide1193		-0.242118	-0.301728	0.0573466	-0.0425406	0.282988	0.107584									-0.354925	-0.076208	0.0970838	-0.174101	0.013478	0.142747		-0.131104	-0.222597	0.0697675	-0.106673	0.0735506	0.0576343		-0.0874693	-0.240403	0.0207491	-0.0727695	0.00409105	0.0756526									0.137597	-0.363031
A0A0C4DGZ8	GP1BA	S606	GRVGPLVAGRRPSALSQGRGQDLLSTVSIRY	Peptide1194																																												1.42247	-0.86004
H7BXT7	BET1L	S9	_______MADWARAQSPGAVEEILDRENKRM	Peptide1195																-0.0708185	-0.114414	0.0690342	0.0717165	0.0700882	0.135564																							-0.34508	-0.667864
A0A0C4DH22	EPB41L1	S510	EFLDKPEDVLLKHQASINELKRTLKEPNSKL	Peptide1196		0.450898	-0.60928	0.0348651	0.271936	-0.0438004	0.135131		0.158993	0.233332	0.0235006	0.0555711	-0.228613	0.0330396																0.154348	-0.479071	0.318444	-0.117201	0.19456	0.18183									0.871402	-0.715059
A0A0C4DH22	EPB41L1	S639	VIGDYHGSAFEDFSRSLPELDRDKSDSDTEG	Peptide1197									-0.213238	-1.04177	-0.155478	-0.297507	-0.0164231	-0.413141																														0.346037	-1.11862
A0A0C4DH22	EPB41L1	S783	MIPGPQTVATEIRSLSPIIGKDVLTSTYGAT	Peptide1198									0.0879557	-0.30481	0.0448261	-0.168362	0.0799756	-0.322129																														0.000343904	-0.786427
A0A0D9SEI0	C6orf203	S111	TKSTKKSLQKVDEEDSDEESHHDEMSEQEEE	Peptide1199		0.523485	-0.171098	0.379306	0.70211	0.25131	0.32754		-0.0546243	-0.203825	0.362434	0.175215	0.37036	0.17175		0.205225	-0.0830998	0.827727	0.23755	0.404301	0.316174		0.0387776	-0.343326	0.666097	0.200898	0.197738	0.305048		0.20852	-0.170901	0.432372	0.143394	0.446191	0.267606		0.419179	-0.0650467	0.761002	0.297153	0.258414	0.455113		0.137923	-0.166303
A0A0D9SEI0	C6orf203	S115	KKSLQKVDEEDSDEESHHDEMSEQEEELEDD	Peptide1200		0.714719	-0.407193	0.571382	0.832554	0.327795	0.557267		0.367252	0.145328	0.480391	0.29851	0.393142	0.442258		0.226873	-0.0174053	0.739118	0.224796	0.294526	0.229916		0.446249	-0.234354	0.852263	0.263343	0.384333	0.336084		0.379065	-0.010633	0.730436	0.344136	0.226856	0.557162		0.51378	-0.027423	0.819608	0.534506	0.526149	0.515499		0.200247	0.134212
A0A0D9SEI0	C6orf203	S121	VDEEDSDEESHHDEMSEQEEELEDDPTVVKN	Peptide1201		0.713908	-0.087894	0.505294	0.741405	0.483077	0.38569		0.215363	0.119387	0.392498	0.382755	0.40999	0.42603		0.375428	-0.0674844	0.979601	0.402406	0.47043	0.453173		0.519679	-0.254188	0.914588	0.146774	0.42816	0.2871		0.447606	-0.0012046	0.792034	0.32514	0.170916	0.518866		0.43031	0.130453	0.897871	0.552815	0.457057	0.345479		0.163732	0.0672737
P21127	CDK11B	S283	EKMEERDLLSDLQDISDSERKTSSAESSSAE	Peptide1202																0.430134	0.00805769	0.378716	0.261285	-0.077023	0.236078		0.229173	0.402882	0.558624	0.225726	0.44196	0.519058		0.0186883	-0.0275045	0.387531	0.0701607	0.979575	0.264704		0.187229	0.294463	0.389649	0.444027	1.11982	0.317612		0.214995	0.172367
P21127	CDK11B	S589	GILKVGDFGLAREYGSPLKAYTPVVVTLWYR	Peptide1203		0.419242	-0.624534	0.225981	0.220336	-0.0120198	0.174984		1.02082	0.704113	1.05169	0.730802	0.462955	0.698765									0.693874	0.381147	0.802415	0.466259	0.439761	0.441965		0.500663	0.130935	0.659268	0.342644	0.783856	0.255748									0.457119	-0.00989438
P21127	CDK11B	S752	TWPAKSEQQRVKRGTSPRPPEGGLGYSQLGD	Peptide1204									0.371175	-0.59182	0.423066	-0.0868564	-0.0766485	-0.0342254									-0.0328918	-0.605962	-0.00777813	-0.292926	-0.402537	-0.378151
P21127	CDK11B	S47	IKRLKNSDDRDSKRDSLEEGELRDHRMEITI	Peptide1205		-0.251381	-0.58272	-0.00524718	-0.108125	-0.255716	0.0943745																																					-0.562323	-0.544539
A0A0D9SEU5	RANBP10	S365	SLSSRSPKSQDSYPGSPSLSPRHGPSSSHMH	Peptide1206		0.227084	-0.488625	0.121559	0.24612	0.0327753	-0.246052									-0.000354617	-0.435379	0.220627	0.207462	-0.355143	0.0771149		0.115104	-0.362717	0.0953677	-0.24777	-0.489271	-0.394526		-0.0592857	-0.678567	0.0712239	-0.0310549	-0.0131681	-0.410871									-0.0452026	-0.402266
H7C0P6	MAP4K4	S717	GMRPEAIRQDPTRKGSVVNVNPTNTRPQSDT	Peptide1207		0.287874	0.0231891	0.725551	-0.243209	0.255973	0.0370599									0.636831	0.325779	0.389808	0.451419	0.545642	0.303682		0.375314	-0.188951	0.311541	0.115213	0.155699	-0.272268		0.0295987	-0.0100314	-0.15589	0.388013	-0.111406	0.1523									0.18263	0.0384759
H7C0P6	MAP4K4	S456	PVRTTSRSPVLSRRDSPLQGSGQQNSQAGQR	Peptide1208																0.109595	-0.413215	-0.142615	-0.205912	-0.227867	-0.291137		0.0084555	-0.521677	-0.0958428	-0.420119	-0.554666	-0.413105		-0.590682	-0.632775	-0.278232	-0.157176	0.231232	-0.859463
H7C0P6	MAP4K4	S448	PADRAREVPVRTTSRSPVLSRRDSPLQGSGQ	Peptide1209																														-0.297247	-0.356674	-0.364101	-0.444283	0.0291729	-0.605858									-0.392529	-0.339572
O00571	DDX3X	S594	HYKGSSRGRSKSSRFSGGFGARDYRQSSGAS	Peptide1210									0.0487487	-0.579367	0.158186	-0.231202	0.0994298	-0.165498									0.327675	-0.523283	-0.0869279	-0.0562033	-0.24039	-0.169031		-0.46931	-0.37187	-0.373801	-0.148627	0.333183	-0.34566		-0.637566	-0.590529	-0.353038	-0.224298	0.607496	-0.26856
O00571	DDX3X	S82	DAYSSFGSRSDSRGKSSFFSDRGSGSRGRFD	Peptide1211									0.129132	-0.0797928	-0.194562	0.042925	0.333229	0.149653		0.0566762	-0.281328	-0.551608	-0.0333894	0.0708834	-0.289134		0.284698	-0.108754	0.141178	-0.230625	0.00185918	-0.0235274		-0.199887	-0.117884	-0.104504	0.210985	0.00966269	-0.00051582		-0.301599	-0.0563653	0.125533	-0.360793	0.216609	-0.144519
O00571	DDX3X	S83	AYSSFGSRSDSRGKSSFFSDRGSGSRGRFDD	Peptide1212									-0.209208	-0.917921	-0.316584	-0.0683488	-0.105785	-0.321687																							-0.485669	-0.476201	-0.0630151	-0.626746	0.121939	-0.294903
O00571	DDX3X	S606	SRFSGGFGARDYRQSSGASSSSFSSSRASSS	Peptide1213																-0.359945	-0.566846	-0.221246	-0.594169	-0.383929	-0.561418		-0.29462	-0.392043	0.0786084	-0.433288	-0.137124	-0.034688		-0.303319	-0.940822	-0.615943	-0.51146	1.1053	-0.787071		0.0175136	-0.139515	-0.561018	-0.483499	1.13173	0.0847827		-0.146479	-0.320854
O00571	DDX3X	S612	FGARDYRQSSGASSSSFSSSRASSSRSGGGG	Peptide1214																-0.422521	-0.446544	-0.640218	-0.485315	-0.527832	-0.476913		0.205971	-0.358969	-0.0258572	-0.576139	-0.282223	-0.209677		-0.336672	-0.616604	-0.448075	-0.130904	0.584276	-0.579364
O00571	DDX3X	S90	RSDSRGKSSFFSDRGSGSRGRFDDRGRSDYD	Peptide1215		0.152855	-0.0486093	0.541043	-0.482261	-0.242469	0.299336		0.568514	0.0603354	0.238643	0.381304	-0.15754	0.320407		0.200909	0.0310306	-0.240896	0.201746	-0.154289	0.0531529		0.904789	0.0327944	0.229853	-0.0303294	-0.148791	0.14444		0.15223	0.199455	-0.0824912	0.521592	-0.0469007	-0.0247777		-0.261943	0.248273	0.296552	-0.277475	0.286542	-0.281472
A0A0D9SF54	SPTAN1	S1029	GFVPAAYVKKLDPAQSASRENLLEEQGSIAL	Peptide1216									-0.103352	-0.693857	0.061463	-0.46632	0.00703382	-0.0397172																														-0.356607	-0.845935
A0A0D9SF54	SPTAN1	S1031	VPAAYVKKLDPAQSASRENLLEEQGSIALRQ	Peptide1217		0.290922	-0.567684	-0.303963	0.316874	-0.171293	0.230807		0.382317	-0.477277	0.26184	0.125272	0.195857	-0.0284027		-0.533851	-1.0339	-0.111767	-0.277876	-0.712602	-0.288938		0.250861	-0.332955	0.501958	-0.124861	-0.199819	0.296855		0.18383	-0.761299	0.18459	-0.0155837	0.379011	-0.12637		0.215221	-0.166526	0.245658	-0.0637661	0.588144	-0.171524		0.770949	-1.03367
A0A0D9SF54	SPTAN1	S1197	VATFNSIKELNERWRSLQQLAEERSQLLGSA	Peptide1218		0.512544	-0.0427722	0.084306	0.407814	0.203626	0.116107		0.40725	0.00154898	0.153747	0.0158698	0.490926	-0.0614907		0.109373	-0.119149	0.156425	0.0181066	0.0320971	0.0188553		0.400063	0.0529746	0.335537	0.212842	0.151729	0.0886805		0.138894	-0.119825	0.232908	0.180355	0.42225	0.141483		0.176676	0.201679	0.355287	0.442464	0.397314	0.17072		0.703406	-0.198099
A0A0D9SF60	PKP4	S336	AQTRVASPSQGQVGSSSPKRSGMTAVPQHLG	Peptide1219																														-0.19874	-0.446739	0.207921	-0.237714	0.43393	0.123743									0.0273999	-0.629101
A0A0D9SF60	PKP4	S337	QTRVASPSQGQVGSSSPKRSGMTAVPQHLGP	Peptide1220																							-0.179207	-0.683998	0.0396484	-0.176305	-0.389773	-0.282987																-0.313422	-0.844852
A0A0D9SF70	ARFGAP2	S296	ESSEARQKFAGAKAISSDMFFGREVDAEYEA	Peptide1221									0.382054	0.247333	0.102095	-0.17072	0.0295596	0.0231337		0.154754	-0.0988783	-0.204467	-0.167435	-0.107659	-0.234264		0.193818	0.391768	-0.0234192	0.0494068	0.116861	0.104891		-0.0705017	0.0663814	-0.185522	0.134834	0.358249	-0.160463		-0.113559	0.0967137	-0.453567	-0.106902	0.872113	-0.351234
A0A0D9SF70	ARFGAP2	S297	SSEARQKFAGAKAISSDMFFGREVDAEYEAR	Peptide1222		0.0554048	0.52419	0.11133	0.0720479	0.11082	0.263168		0.29532	-0.0750575	0.18648	-0.0237646	-0.0261849	0.0425208		0.269935	0.0695113	0.15561	0.0314048	0.123814	-0.116452		0.22251	0.21389	0.170233	0.0190161	0.145165	0.216779		0.0327777	-0.0387719	0.00414168	0.0613447	0.570089	-0.077451		0.144868	0.21295	0.0288462	0.146282	0.720741	0.0125801		0.259343	-0.00725559
A0A0D9SF70	ARFGAP2	S232	SGPPKYKDNPFSLGESFGSRWDTDAAWGMDR	Peptide1223		-0.124394	0.246112	0.109621	0.095043	0.394514	0.172859		0.597039	-0.111611	0.664879	-0.00338106	0.261978	0.0306205		0.0444087	0.05147	-0.0990155	-0.266263	0.315747	-0.297222		0.214066	0.269184	0.326854	0.0563683	0.587065	0.20286		0.125433	-0.151619	0.0439798	0.125611	1.05663	-0.22333		-0.0148236	0.271715	-0.207241	-0.0849202	1.22996	-0.118881		0.41175	0.0962765
A0A0D9SF70	ARFGAP2	S104	LGAKKGLGAQKVSSQSFSEIERQAQVAEKLR	Peptide1224																														-0.319988	-0.534757	-0.373873	-0.268928	0.699133	-0.459211		-0.209865	0.0842229	-0.344247	-0.200766	1.09045	-0.280423
A0A0D9SGF3	MEF2C	S96	GAGTSAGNGYGNPRNSPGLLVSPGNLNKNMQ	Peptide1225																														0.147427	-0.607549	0.246785	0.0139771	1.08368	0.232008									-0.140646	-0.0395853
B0ZBF6	NR3C2	S703	QPQQQQPPPPPPPPQSPEEGTTYIAPAKEPS	Peptide1226																														-0.287554	-0.37708	-0.223349	-0.127916	-0.0713333	-0.193576
B0ZBF6	NR3C2	S299	PVSSPNNVTLRSSVSSPANINNSRCSVSSPS	Peptide1227																														-0.358642	-0.521096	-0.216612	-0.185159	-0.202385	-0.42064
A0A0X1KG75	COBLL1	S828	VKETAIQTEDSAISESPEEPLPNLKPKPNLR	Peptide1228									-0.347551	-0.278807	0.258346	-0.100775	0.229752	-0.0964492																														0.175079	-0.834722
A0A0D9SGJ6	SYNJ1	S1344	MPPIPARSQSQENMRSSPNPFITGLTRTNPF	Peptide1229									0.520981	-0.0230103	0.449935	0.364469	-0.00623852	0.493629									0.412768	-0.577663	0.480482	0.0353949	-0.169568	0.161075		0.0218355	-0.765392	0.332613	0.109761	0.195669	0.14927									0.206386	-0.645548
A0A0G2JIW1	HSPA1B	S255	NHFVEEFKRKHKKDISQNKRAVRRLRTACER	Peptide1230																0.90523	0.545041	0.688207	0.500749	0.470228	0.502574		0.458944	0.204925	0.524724	0.164211	0.115856	-0.0574286		0.33166	0.234928	0.604634	0.330738	-0.176608	0.092487									0.482875	0.299267
A0A0G2JIW1	HSPA1B	S308	DFYTSITRARFEELCSDLFRSTLEPVEKALR	Peptide1231									0.0989332	-0.229122	0.253395	-0.240396	-0.12302	0.160756		0.701949	-0.0348685	0.290885	0.252976	-0.0569306	0.154212		0.152608	-0.120449	0.241231	-0.0290326	-0.148354	-0.0721585		0.00955923	0.0693914	0.126252	0.124287	-0.0594136	0.0123498		0.0684538	-0.230369	0.0950336	0.134253	0.0235696	0.219837		0.0210698	0.196115
A0A0G2JIW1	HSPA1B	S632	GPGPGGFGAQGPKGGSGSGPTIEEVD_____	Peptide1232		0.119252	0.120523	0.236422	0.113515	0.198415	0.147969									0.391729	0.472959	0.300885	0.430125	0.27356	0.442426		-0.0352477	-0.308511	0.0625484	-0.0774902	-0.0579052	0.0282518		0.182834	-0.168188	0.055902	-0.0678597	0.0322505	-0.141808									0.0710071	-0.0885293
A0A0G2JIW1	HSPA1B	S634	GPGGFGAQGPKGGSGSGPTIEEVD_______	Peptide1233		-0.132377	-0.223214	-0.192678	-0.0390871	0.055387	0.0157754																							-0.256606	-0.389074	-0.146416	-0.228435	-0.0368332	0.0934884									-0.11825	-0.217007
A0A0G2JIW1	HSPA1B	S107	PFQVINDGDKPKVQVSYKGETKAFYPEEISS	Peptide1234		-0.330512	-0.805865	0.251148	-0.0860933	0.440063	-0.117324		0.384559	-0.506748	0.577723	-0.553278	-0.044104	0.0386301		0.0355679	0.0783574	0.0539958	-0.110242	0.269653	-0.0128205		0.256074	-0.379478	0.360772	-0.106195	-0.291062	-0.421105
A0A0G2JMS7	SCRIB	S1272	AQPPTPGPAASPEQLSFRERQKYFELEVRVP	Peptide1235																-0.736879	-0.759011	-0.00111478	-0.275512	0.0300478	-0.171298																-0.499739	-0.217217	0.0443754	0.137795	0.841085	-0.0976161		-0.655763	-1.14576
A0A0G2JMS7	SCRIB	S794	RHVACLARSERGLGFSIAGGKGSTPYRAGDA	Peptide1236																							-0.0342767	-0.565803	-0.0651266	-0.350853	-0.103964	-0.301553		-0.633166	-0.42168	-0.360587	-0.379604	0.25933	-0.464842		-0.272858	-0.280922	-0.0275855	-0.232337	0.537395	-0.105922
A0A0G2JMS7	SCRIB	S627	DKEGAVVSAPSVKGVSFDQANNLLIEPARIE	Peptide1237																-0.284746	-0.156806	-0.252318	-0.244442	0.0489471	-0.208039		-0.409843	-0.212388	-0.350986	-0.46062	0.43387	-0.30214		-0.479545	-0.240479	-0.55231	-0.441326	0.526927	-0.541531		-0.199385	0.0538374	-0.109964	-0.179908	0.811803	-0.206377		-0.201754	-0.14306
A0A0G2JMS7	SCRIB	S772	ERRGGGLRLPLLPPESPGPLRQRHVACLARS	Peptide1238		0.339422	0.0324121	-0.373926	0.00832127	0.0354715	0.282959		-0.0937985	-0.205501	-0.00648701	-0.0742239	-0.107575	0.158101		-0.144206	0.0982207	0.0184909	-0.0700065	0.0586112	-0.0553836		-0.0746252	-0.140157	-0.019917	-0.0265598	0.0930547	0.149989		0.0033418	-0.263242	0.189364	-0.0847901	-0.0390197	0.0840949		0.0600669	-0.0850359	0.0762512	0.120248	0.191752	0.163339		-0.0343387	-0.265034
A0A0G2JMS7	SCRIB	S754	E VTITPLRPEDDYSPRERRGGGLRLPLLP	Peptide1239		-0.0593435	-0.20779	-0.0355806	-0.337554	0.290272	0.238037		-0.198368	-0.38412	-0.0971194	0.0632401	-0.0254695	0.268616		-0.4299	-0.0835098	-0.0995815	0.118122	0.109122	0.113495		-0.0960684	-0.296364	-0.353979	-0.0520962	0.0527497	0.623746		-0.192751	-0.472284	-0.12498	-0.0223471	0.137551	0.380639		-0.179765	-0.182014	-0.139404	0.0332713	0.318085	0.11536		-0.0552504	-0.497275
A0A0G2JMS7	SCRIB	S1139	GVIANPFAAGIGHRNSLESISSIDRELSPEG	Peptide1240		-0.129451	-1.10079	0.0854461	0.328675	0.087228	-0.00815078																							-0.205878	-0.238243	0.0345538	-0.439187	0.369778	-0.103949									-0.201523	-0.506951
A0A0G2JMS7	SCRIB	S1142	ANPFAAGIGHRNSLESISSIDRELSPEGPGK	Peptide1241																							-0.261807	-0.450537	-0.502046	-0.244455	-0.363106	-0.795691
A0A0G2JMS7	SCRIB	S1364	DEQPPWASPSPTSRQSPASPPPLGGGAPVRT	Peptide1242		-0.213669	-0.225733	-0.199872	-0.363624	0.130321	-0.180161									0.0398262	-0.0172066	0.069909	0.0196606	0.101259	0.0766959
A0A0G2JMS7	SCRIB	S1367	PPWASPSPTSRQSPASPPPLGGGAPVRTAKA	Peptide1243																							-0.150625	-0.0185761	-0.280259	-0.0778216	0.180082	0.0643859		-0.115649	-0.117446	-0.0372082	-0.309676	0.0985606	0.0617563									-0.171105	-0.211694
A0A0G2JMS7	SCRIB	S1498	RLSPDFAEELRSLEPSPSPGPQEEDGEVALV	Peptide1244																							-0.412518	-1.10127	-0.490577	-0.37507	-0.47183	-0.474741																-0.637107	-1.09272
A0A0G2JMS7	SCRIB	S1500	SPDFAEELRSLEPSPSPGPQEEDGEVALVLL	Peptide1245									-0.285895	-0.972015	-0.366765	-0.376672	-0.268531	-0.346913		-0.432081	-0.155853	-0.1491	-0.181214	-0.0508642	-0.196134		-0.19661	-0.779811	-0.315216	-0.206959	-0.313745	-0.326018									-0.357614	-0.322843	-0.101609	-0.0711428	0.200313	-0.201362		-0.340198	-0.80965
A0A0G2JMS7	SCRIB	S1427	LEAEKRALWRAARMKSLEQDALRAQMVLSRS	Peptide1246		0.117136	0.423965	0.04091	-0.0528097	0.20871	0.0744383		0.559269	0.383093	0.550817	0.121993	0.189025	0.341667		0.154167	0.153497	0.157786	0.0749949	0.151674	0.0945471		0.280716	0.506274	0.361954	0.151616	0.264477	0.358702		0.340343	0.315721	0.210267	0.117337	0.464	0.150278									0.324601	0.337254
A0A0G2JMS7	SCRIB	S1394	TAKAERRHQERLRVQSPEPPAPERALSPAEL	Peptide1247																0.218856	0.604749	0.0807832	-0.0336254	0.286266	0.244725		-0.143916	0.228428	-0.472146	-0.0834882	0.16142	0.291896		-0.102965	0.2535	-0.314435	-0.131002	-0.0838762	0.345107									-0.0182525	0.16524
A0A0G2JQJ7	MAPT	S721	GAEIVYKSPVVSGDTSPRHLSNVSSTGSIDM	Peptide1248		0.32184	1.48253	-0.173842	0.042641	0.374493	0.125976									0.375693	0.853347	0.0845696	0.280078	0.206384	0.270932		-0.194057	0.458749	-0.294849	-0.134498	-0.00497088	-0.184989		-0.144646	0.403442	-0.335505	-0.38109	0.445711	-0.438749		0.76474	0.670214	0.163677	0.0258301	0.769445	-0.11461		-0.158481	0.595328
A0A0G2JQJ7	MAPT	S227	PGSKEEVDEDRDVDESSPQDSPPSKASPAQD	Peptide1249																0.148915	-0.0399086	-0.129595	-0.132242	-0.201596	0.213505		-0.496201	-0.658449	-0.159023	-0.569495	-0.511058	1.43035		-0.94237	-0.742764	-0.461232	-0.591483	1.06062	0.626962
A0A0G2JQJ7	MAPT	S228	GSKEEVDEDRDVDESSPQDSPPSKASPAQDG	Peptide1250																-0.231599	-0.198426	-0.180927	-0.161071	-0.278136	0.146732		-0.161956	-0.168509	0.13259	-0.126766	-0.0873537	1.1824		-0.770831	-0.567765	-0.270237	-0.528788	1.24749	1.02567									-0.324093	-0.266559
A0A0G2JQJ7	MAPT	S232	EVDEDRDVDESSPQDSPPSKASPAQDGRPPQ	Peptide1251																-0.0374425	0.265321	0.472483	0.0884717	0.234315	0.349205																							-0.561878	-0.381609
A0A0G2JQJ7	MAPT	S56	AGLKESPLQTPTEDGSEEPGSETSDAKSTPT	Peptide1252																							-0.0599004	-0.291408	0.0908917	-0.435819	-0.270976	-0.576342		-0.531825	-0.489415	-0.0363468	-0.44059	0.34401	-0.38642
A0A0G2JQJ7	MAPT	S61	SPLQTPTEDGSEEPGSETSDAKSTPTAEAEE	Peptide1253																0.151406	0.0974412	0.717223	0.29515	0.463759	0.311571																							-0.684976	0.0395745
A0A0G2JQJ7	MAPT	S733	GDTSPRHLSNVSSTGSIDMVDSPQLATLADE	Peptide1254		-0.305945	-0.318871	-0.196175	-0.399541	0.196452	-0.398682									-0.109807	-0.882974	-0.193152	-0.464496	0.193666	-0.879662		-0.362747	-0.631872	-0.324039	-0.625265	0.199982	-0.653291		-0.274565	-0.749715	-0.642629	-0.792119	0.758395	-1.27485		-0.42896	-0.499622	-0.366688	-0.472938	1.12635	-0.650187		-0.468334	-0.566552
A0A0G2JQJ7	MAPT	S437	PLIQPSSPAVCPEPPSSPKYVSSVTPRTGSS	Peptide1255									0.125332	-0.942399	0.534727	0.0473016	0.130786	0.248658									0.17258	-0.945711	0.344215	0.109327	0.0334626	0.218479									-0.00870659	-0.937187	0.129577	-0.161204	0.990008	-0.0927604		-0.524209	-0.750218
A0A0G2JQJ7	MAPT	S438	LIQPSSPAVCPEPPSSPKYVSSVTPRTGSSG	Peptide1256																							-0.127108	-1.17408	-0.00923924	-0.236755	-0.424289	-0.182315																-0.265558	-0.917684
A0A0G2JQJ7	MAPT	S673	SEKLDFKDRVQSKIGSLDNITHVPGGGNKKI	Peptide1257		0.608174	-0.223985	0.533773	0.408089	0.220588	0.428645		0.387065	0.00744484	0.524931	0.117641	0.218006	0.134573		0.0131233	-0.348755	0.0885476	-0.0583092	-0.00528732	0.0527754		0.382161	-0.0936254	0.732891	0.185541	0.607745	0.114453		0.123041	-0.317586	0.157643	0.115695	1.28534	-0.164127		0.249207	0.269839	0.401443	0.0942295	1.31189	0.136206		0.121431	0.208754
A0A0G2JQJ7	MAPT	S411	STRSSAKTLKNRPCLSPKHPTPGSSDPLIQP	Peptide1258		0.590716	-0.0815702	0.476975	0.186577	0.590949	0.819339									0.70003	0.49993	0.506689	0.431625	0.240168	0.359746									-0.0645548	-0.493481	0.117239	-0.0658953	0.521943	0.998123									-0.0775111	0.00741292
A0A0G2JQJ7	MAPT	S516	SSGEPPKSGDRSGYSSPGSPGTPGSRSRTPS	Peptide1259																-0.329749	-0.196915	-0.157884	-0.193874	0.0259123	-0.163536		-0.331106	-0.434166	-0.216368	-0.111706	0.217907	-0.388684		-0.285915	-0.406412	-0.266173	-0.45698	0.398426	-0.351378		0.254776	-0.738901	0.256047	0.17752	0.612568	-0.241757		-0.410101	0.00890429
A0A0G2JQJ7	MAPT	S519	EPPKSGDRSGYSSPGSPGTPGSRSRTPSLPT	Peptide1260		0.151601	0.178398	0.145504	0.100788	0.720713	0.126639		0.291605	-0.195023	0.231665	0.340343	0.247567	-0.0434438		0.00111986	0.211954	0.0143897	-0.156173	-0.0942968	0.135796		0.0422489	0.445786	0.158277	0.212121	-0.0375572	0.183202		0.129311	0.443393	-0.0111913	-0.16905	0.382414	-0.04264		0.434069	0.489889	0.291809	0.103485	0.558532	-0.205419		-0.0970186	0.680529
A0A0G2JQJ7	MAPT	S527	SGYSSPGSPGTPGSRSRTPSLPTPPTREPKK	Peptide1261																-0.293139	-0.453017	0.28774	-0.257076	-0.237652	-0.083368		-0.0796112	-0.747546	-0.135916	-0.363144	-0.0806444	-0.196006																-0.329968	-0.662076
A0A0G2JQJ7	MAPT	S531	SPGSPGTPGSRSRTPSLPTPPTREPKKVAVV	Peptide1262																																												-0.750743	0.284701
A0A0G2JQJ7	MAPT	S68	EDGSEEPGSETSDAKSTPTAEDVTAPLVDEG	Peptide1263																							-0.590292	-0.871173	-0.284937	-0.813966	-0.589606	1.61607		-1.21989	-1.06236	-0.659531	-1.19593	0.789386	1.38144
F6RP06	BNIP3	S125	QTPQDTNRASETDTHSIGEKNSSQSEEDDIE	Peptide1264		0.55561	0.0176133	0.492787	0.656449	0.337671	0.458263									0.517037	0.127332	0.752406	0.562064	0.444948	0.523677		0.111229	-0.287333	0.451499	0.156885	-0.0163848	-0.00867335		-0.0415392	0.149663	0.442215	0.0110942	0.279505	-0.179331		0.598969	0.544679	0.789611	0.3788	-0.020175	0.12254		0.0257733	0.123423
F6RP06	BNIP3	S93	YNGDMEKILLDAQHESGRSSSKSSHCDSPPR	Peptide1265									-0.216177	-0.530521	-0.140792	-0.42853	-0.283358	-0.435893
A0A0J9YX88	PHRF1	S1202	TRSHSPERKGAVREASPAPLAQGEPGREDLP	Peptide1266		-0.113084	0.0122376	0.0621942	-0.0437234	0.0808777	0.0297341									-0.0540546	0.19632	0.234459	0.127207	0.0624852	0.283255		-0.0749688	0.000304577	0.0268707	-0.103644	-0.0124317	0.0325087		-0.0544029	-0.136369	0.0470128	-0.173367	0.252799	-0.0406755									0.113738	-0.232848
A0A0J9YX88	PHRF1	S915	SAMSKLRGAVAAEGASDTEREEPTESQGLAA	Peptide1267		-0.042996	0.574324	-0.0551675	-0.0766517	-0.00858367	-0.0781075									-0.0207076	0.154587	0.0729589	0.222135	0.041125	0.0936395		-0.107137	0.0665129	-0.077699	0.0304085	-0.179357	-0.0751353		-0.189111	-0.259441	-0.0915974	-0.0774313	0.284823	-0.15286									0.310049	-0.376509
A0A0J9YX88	PHRF1	S991	VLQAATHRVVELRPPSRSRSTSSSRSRKKAK	Peptide1268		0.0282287	0.373416	-0.0335575	0.0120386	0.0120407	0.285054		0.124869	0.0780345	0.14802	-0.0696051	0.108454	-0.148453		-0.115088	0.0314118	-0.10164	-0.186769	0.0488175	0.0799029		0.109778	0.231841	-0.0411153	0.140271	0.0515156	0.0204791		0.143635	-0.0298015	-0.24296	-0.00723544	0.374278	0.0708809		0.382684	0.289209	0.0346881	0.0783118	0.394692	-0.147067		0.190767	-0.0460715
A0A0J9YWK3	COBL	S47	HVHSDQKPPHDGALGSQQNLVRMKEALRAST	Peptide1269		0.332106	-0.0698636	0.173336	0.265555	0.0134443	0.180292		0.25868	0.427882	0.371196	0.240391	0.126728	0.165931		-0.363215	-0.500487	-0.0235606	0.0820973	0.0307609	-0.298442		0.168159	0.535779	0.286577	0.0632172	0.370752	-0.0368818		0.103281	0.0014926	0.338586	-0.00593602	0.768278	-0.109784		0.295587	0.135176	0.302476	0.249068	0.364339	0.146407		-0.0549321	0.00176369
A0A0J9YWK3	COBL	S362	KRRAPAPPPPQPPPPSPLIPNRTEDKEENRK	Peptide1270		0.282783	-0.0402108	0.239846	0.274355	0.117411	0.264757		0.0542202	-0.149796	0.214397	-0.0132914	-0.0709978	0.0497738		-0.153155	-0.0487661	0.0514234	0.0968441	0.0929882	0.141309		0.0547709	-0.128396	0.0800507	0.157991	0.030994	0.351377		-0.0370219	-0.131245	0.113419	-0.105173	0.37411	0.216525		0.320901	0.0952555	0.373788	-0.0472571	0.528657	0.145192		0.067796	-0.188156
A0A0J9YWK3	COBL	S332	APPPPGSGPPVQDKASEKVSLGSQIDLQKKK	Peptide1271		-0.0720735	-0.739906	0.475792	-0.220955	-0.414448	-0.0542515									0.310497	-0.0719205	0.194701	0.268958	0.253165	0.0563096
A0A0J9YWK3	COBL	S336	PGSGPPVQDKASEKVSLGSQIDLQKKKRRAP	Peptide1272		0.657847	-0.4662	0.572924	0.640979	0.143042	0.517622																							-0.199705	-0.462461	0.368869	-0.418926	0.685798	0.120493		0.387912	0.201916	0.541591	0.494755	0.556158	0.487314		-0.515545	-0.22457
A0A0J9YWK3	COBL	S339	GPPVQDKASEKVSLGSQIDLQKKKRRAPAPP	Peptide1273		0.642508	0.158379	0.433735	0.520028	0.199348	0.320674		0.662061	0.494326	0.415855	0.0831181	0.207104	0.146875		0.129706	-0.0262271	0.35277	0.285529	0.297071	0.117812		0.62429	0.291978	0.583157	0.221383	0.297068	0.239691		0.221018	0.123726	0.514995	0.15546	0.597813	0.368901		0.528948	0.303831	0.48367	0.233861	0.587194	0.40231		0.0843244	0.233638
A0A0J9YWK3	COBL	S61	GSQQNLVRMKEALRASTMDVTVVLPSGLEKR	Peptide1274		0.436909	0.445323	0.400734	0.483753	0.039369	0.447915									0.186919	0.197658	0.436643	0.452962	0.237508	0.464547		0.0959845	0.121488	0.122288	0.0232319	-0.0453688	-0.100588		-0.111265	-0.0333887	0.266453	-0.264341	0.555682	-0.253584		0.394813	0.311116	0.533701	0.478213	0.440287	0.285234		-0.0692534	-0.0162961
A0A0J9YWK3	COBL	S284	VNKRSNSKGCLTTPNSPSMHSRSLTLGPSLS	Peptide1275		-0.180513	0.222426	0.318557	0.0836329	0.186326	-0.100245									0.0531857	0.284918	0.0442087	0.239644	0.105938	0.197327		-0.104463	-0.0471965	-0.288495	-0.173862	-0.328579	0.0147383		-0.25091	-0.00910601	-0.0675343	-0.302155	-0.039125	-0.0542799									-0.357073	0.0420248
A0A0J9YWK3	COBL	S286	KRSNSKGCLTTPNSPSMHSRSLTLGPSLSLG	Peptide1276		-0.218149	-0.0127512	-0.0509185	-0.053645	0.0129189	0.0563781									-0.333957	-0.0195388	-0.125189	-0.237753	-0.24263	-0.0216097		-0.161166	-0.0854542	-0.398115	-0.0696831	-0.192803	0.142253		-0.302887	-0.355675	0.0949134	-0.365158	0.188355	-0.144685									-0.262622	-0.238353
A0A0J9YWK3	COBL	S249	TQSEPSLSCQETFRKSSLGNDETDKEKKKFL	Peptide1277		0.588804	-0.0862173	0.94463	0.379178	0.0783854	0.276128									0.348391	0.59563	0.524265	0.308098	0.541452	0.385465		0.487587	0.114708	0.55302	0.40872	0.250906	0.0716477		0.377357	0.258705	0.581596	0.172984	0.112012	0.402785									-0.164254	0.0720323
A0A0J9YWK3	COBL	S250	QSEPSLSCQETFRKSSLGNDETDKEKKKFLG	Peptide1278		0.683075	-0.329692	1.14044	0.478416	0.0984495	0.339595									0.487328	0.443212	0.678117	0.491445	0.611387	0.440918		0.558981	0.185024	0.815195	0.475029	0.43114	0.12671		0.411243	0.240088	0.852337	0.277902	0.316077	0.409526									-0.109234	0.102567
A0A0J9YWK3	COBL	S212	LLRDNIAGEELELSKSLNELGIKELYAWDNR	Peptide1279		0.671377	0.299656	0.649439	0.521938	0.165887	0.42329		0.603923	0.543952	0.630261	0.34559	0.217837	0.411252		0.122098	0.168854	0.453054	0.355428	0.462929	0.331936		0.720552	0.296268	0.626246	0.484467	0.401572	0.395357		0.425502	0.319547	0.631735	0.269731	0.573986	0.439984		0.506048	0.333672	0.564449	0.494948	0.581185	0.489656		0.136119	0.251079
A0A0J9YWK3	COBL	S299	SPSMHSRSLTLGPSLSLGSISGVSVKSEMKK	Peptide1280																-0.0551936	-0.0923082	0.161046	-0.0546462	-0.00465541	0.0901897		-0.120056	-0.309229	0.0482194	-0.0933793	0.104271	-0.0515589		-0.0161373	-0.383372	0.07245	-0.421973	0.251265	0.0924552		0.0237151	-0.034066	0.0434562	0.161433	0.518495	0.205185		-0.243992	-0.0795511
A0A0J9YWK3	COBL	S302	MHSRSLTLGPSLSLGSISGVSVKSEMKKRRA	Peptide1281																							-0.162864	-0.315101	-0.0732232	-0.146963	0.417353	-0.137394		-0.422659	-0.135896	-0.160837	-0.474944	0.533484	-0.0793197		-0.237456	0.0117441	0.142965	0.0303788	0.549734	-0.155463		-0.662821	-0.0442516
A0A0J9YWK3	COBL	S304	SRSLTLGPSLSLGSISGVSVKSEMKKRRAPP	Peptide1282																-0.353183	-0.53237	0.181938	-0.127522	0.00829425	-0.121118									-0.175229	-0.280334	0.158311	-0.298819	0.13337	0.130808									-0.326382	-0.309742
A0A0J9YWK3		S236	LYAWDNRRVRLSKTQSEPSLSCQETFRKSSL	Peptide1283		0.342557	0.00799948	0.427734	0.566607	0.250392	0.447101		0.504456	0.0922975	0.431462	0.0366367	0.0462354	0.0659254		0.292926	-0.0506561	0.331371	0.244753	0.105588	0.184477		0.432186	0.15865	0.418136	0.234517	0.0374615	0.237666		0.146397	0.085385	0.395715	0.0760391	0.42391	0.277309		0.409692	0.272019	0.46247	0.310989	0.479609	0.290173		0.0655461	0.116164
I3L1U0	RILP	S180	AESSFGLWYRGKAESSEDETSSPAPSKLGGE	Peptide1284																-0.226452	-0.55396	-0.0878562	-0.274572	0.0672415	-0.344019		0.10361	-0.382853	0.211424	-0.142704	0.110003	-0.538415																-0.245137	-0.375236
A0A0J9YWT2	MPZ	S83	RYCWLRRQAALQRRLSAMEKGKLHKPGKDAS	Peptide1285									-1.43598	-1.91805	-1.86287	-1.53149	3.72093	-0.737377		-1.53939	0.42653	-0.856659	-0.472312	-0.842442	-1.01041		-0.768737	-1.23599	-0.0378942	-0.888056	-0.877349	-0.595703
A0A0J9YX62	D JB6	S315	GVQREAAVEQAQSETSLGARGQRGHKPRLGC	Peptide1286																0.283186	0.692472	-0.141745	0.0598103	0.0330532	-0.0710046		0.143209	1.03222	-0.0492631	0.149103	0.287156	-0.228124		-0.0238081	0.808965	-0.236302	-0.00101759	0.555364	-0.114892									-0.00517229	0.707724
A0A0J9YX62	D JB6	S277	PPRPASLLRHAPHCLSEEEGEQDRPRAPGPW	Peptide1287																0.832048	-0.390319	0.323879	0.201462	-0.279243	-0.219171		0.217204	0.0228517	0.0850183	-0.195414	-0.335763	-0.448354		0.0133755	-0.0801871	-0.108743	-0.246526	0.0422389	-0.535914									-0.0159495	-0.0713146
A0A0J9YXN7	PLIN4	S253	AVSTGLTGAVNVARGSIQTGVDTSKTVLTGT	Peptide1288		0.243932	-0.740436	0.797043	0.254798	-0.150606	0.797619		0.513646	0.0478541	0.679297	0.402439	0.372354	0.303574		0.47029	-0.189395	-0.389148	0.391175	0.263885	0.0074336		0.87651	-0.359777	0.594341	0.0774895	0.236159	0.0898647		0.39086	0.306201	-0.0151975	0.368356	0.1588	0.449301		-0.164989	0.532235	0.883464	0.0357027	0.0517408	-0.190116		0.460028	0.346864
A0A0J9YXN7	PLIN4	S719	GLMGAVNVAKGTVQTSVDTTKTVLTGTKDTV	Peptide1289		-0.293339	-0.264177	0.24226	-0.0601818	0.218597	0.218905		0.715384	-0.429793	0.579902	0.187552	0.0124709	-0.210085		0.117414	-0.131057	-0.122323	-0.143249	0.145708	-0.142651		0.0530102	-0.0229647	0.495901	0.168489	0.0917957	-0.0250355		0.0669313	-0.109797	0.364618	-0.224906	0.662961	-0.22869
A0A0J9YXN7	PLIN4	S1253	KAQQAPEGQPRLDQGSGASAEDAAVQEERDA	Peptide1290																														-0.303272	-0.36852	-0.115451	-0.40652	-0.0928239	-0.0778304									-0.34196	-0.573793
A0A0J9YXN7	PLIN4	S1256	QAPEGQPRLDQGSGASAEDAAVQEERDAGVL	Peptide1291		-0.283071	0.506964	-0.289077	-0.393794	0.281056	-0.151185									0.188803	0.207901	0.0684523	0.39019	0.374815	0.35365		0.0481061	0.315165	-0.0782863	0.0122963	-0.21545	0.0312461		-0.0225363	0.120228	0.158902	-0.0173851	-0.217137	0.088346
A0A0J9YXN7	PLIN4	S41	LPGFSSARNLVA HSSARARPAADPTGAPA	Peptide1292		0.270565	0.180521	0.0074122	-0.0398183	-0.067979	0.512407		0.186221	-0.308232	-0.0596079	-0.215484	-0.0933119	0.468185		0.309806	-0.117743	-0.105901	0.28606	0.419922	0.182006		0.246387	-0.100905	0.108691	-0.0457104	-0.0138534	0.120168		0.0982842	0.0715354	0.0699995	0.00312125	0.0974714	-0.081655		0.0907364	0.455568	0.437641	-0.159908	-0.145548	0.117302		0.0955961	0.000392546
A0A0J9YXN7	PLIN4	S42	PGFSSARNLVA HSSARARPAADPTGAPAA	Peptide1293		0.127224	-0.351513	-0.0767521	0.062284	-0.0170995	0.426822		0.362203	-0.0826536	0.62701	0.518599	0.584891	0.525435		-0.035598	-0.504362	-0.481192	0.0994921	0.221912	-0.108068		0.628989	-0.165602	0.539594	-0.0846183	0.436576	0.00142964		0.326612	0.124412	0.077973	0.422384	0.0848268	0.255543		-0.121398	0.345488	0.669032	-0.334295	-0.0769533	-0.160865		0.306192	0.258648
A0A0J9YXN7	PLIN4	S21	EGRRDPPKPKGKTLGSFFGSLPGFSSARNLV	Peptide1294									-0.077991	-0.245084	-0.0504487	0.0431988	0.0180904	0.0325835		-0.585635	-0.651381	-0.640999	-0.196125	-0.125182	-0.255053		-0.387001	-0.558316	-0.0674067	-0.412124	0.102616	0.0396963																-0.27588	-0.0828342
A0A0J9YXN7	PLIN4	S25	DPPKPKGKTLGSFFGSLPGFSSARNLVA H	Peptide1295									0.435587	-0.459026	0.526932	0.350048	0.0620791	0.234987									0.221341	-0.236225	0.160973	-0.115864	-0.0169514	0.13058		-0.101424	-0.13321	0.0560067	0.0510043	-0.0551018	0.131491		-0.28021	-0.212893	0.104184	-0.126743	-0.324446	-0.194904		-0.234444	-0.12127
A0A0J9YXN7	PLIN4	S31	GKTLGSFFGSLPGFSSARNLVA HSSARAR	Peptide1296									0.0246066	-1.16098	-0.0138718	0.137546	0.136497	-0.070591		-0.609422	-1.03879	-0.271635	-0.663874	-0.70046	-0.38652		-0.161799	-0.708542	0.273861	-0.211621	-0.480912	-0.20948		0.0187757	-0.996666	0.0521352	-0.0467248	-0.115945	-0.481432		-0.0893195	-0.621945	0.0306372	-0.0751056	-0.413896	-0.285865		0.923844	-1.25516
A0A0J9YY72	NHSL2	S939	LKTTNPLARRIIAQFSKDYETTDNPST____	Peptide1297																-0.714064	-0.383776	-0.0464124	-0.500955	-0.327682	-0.522462		0.295762	-0.163611	0.122573	-0.134162	-0.176547	0.0217851		-0.134187	-0.148149	-0.0866683	-0.222479	0.446119	-0.149959		0.0327738	0.293358	0.238165	0.0418241	1.03285	-0.0517841		0.831393	-0.626566
A0A0J9YYF7	DAAM2	S665	HQELITNPSQQKELGSTEDIYLASRKVKELS	Peptide1298									-0.379217	-0.6745	-0.105823	-0.190137	0.332203	-0.140036									-0.252175	-0.698633	-0.201809	-0.235045	-0.137694	-0.186641									-0.160407	-0.11758	0.129452	-0.236671	-0.249403	-0.360386		0.0192442	-0.906898
A0A0J9YYF7	DAAM2	S1059	VFDKDLCKLKRSRKRSGSQALEVTRERAINR	Peptide1299																																												-0.289061	-0.482278
A0A0J9YYF7	DAAM2	S1025	RERWQRQRKVLAAGSSLEEGGEFDDLVSALR	Peptide1300																							-0.0163574	-0.413963	0.00676956	-0.3403	-0.0388832	-0.0662082		-0.342152	-0.384703	-0.354646	-0.243486	0.0868485	-0.11474		-0.261791	0.01267	-0.0946667	-0.473706	-0.0177974	-0.389678		-0.124025	-0.686648
A0A0J9YYJ3	TMEM184B	S329	GPTWRGGAHGLSRSHSLSGARDNEKTLLLSS	Peptide1301																-0.532879	-0.343392	-0.57392	-0.654495	-0.447608	-0.475209		0.115208	0.165968	-0.345776	-0.181606	-0.0608189	-0.166901		-0.255729	-0.123779	-0.451137	-0.554721	0.532065	-0.335175
A0A0M3HER2	CENPV	S44	AAALAPSATRTRRSASQAGSKSQAVEKPPSE	Peptide1302																-0.855168	0.491094	-1.56609	-1.60247	0.605535	0.015975		-1.60464	0.253577	-2.07143	-0.709395	1.41109	0.860623		-0.910937	0.265137	-1.66801	-1.06278	0.301239	1.42965
D6REM6	MATR3	S188	VPRDDWEEKRHFRRDSFDDRGPSLNPVLDYD	Peptide1303		-0.198408	0.0293845	0.156443	-0.180833	0.597041	0.0649433		-0.12681	0.524514	-0.00225065	-0.490543	0.575665	0.078618		-0.294268	0.572764	-0.332755	-0.32593	0.332794	0.236455		-0.661628	0.507234	-0.706172	-0.235462	0.931373	0.903139		-0.30396	0.549553	-0.612942	-0.347383	0.40199	0.892645		-0.266194	0.347488	-0.376504	-0.153609	0.801762	0.236418		0.0799404	0.151909
D6REM6	MATR3	S195	EKRHFRRDSFDDRGPSLNPVLDYDHGSRSQE	Peptide1304																-0.32633	-0.384567	-0.336496	-0.317051	-0.179053	-0.168148																-0.155659	-0.482903	-0.265043	-0.182171	0.00536555	-0.334221
D6REM6	MATR3	S206	DRGPSLNPVLDYDHGSRSQESGYYDRMDYED	Peptide1305									0.263953	0.147797	0.372596	-0.149247	0.193355	0.283286									0.142905	-0.434943	0.145398	-0.0627422	0.043377	0.0111553		-0.176315	-0.410439	0.148089	-0.126668	0.213069	-0.141705									0.407984	-0.645397
D6REM6	MATR3	S766	ADDPNKDTSE DGQSDENKDDYTIPDEYRI	Peptide1306		1.05429	-0.480271	1.02334	0.871651	0.653915	0.785077		0.649858	0.128456	0.808218	0.445107	0.56367	0.479522		0.461692	0.0189064	0.773934	0.386091	0.480655	0.46575		0.662151	0.13161	1.1054	0.538934	0.591229	0.39733		0.561216	0.0467357	0.753984	0.458981	0.825251	0.493036		0.565483	0.35252	0.935599	0.562828	1.12854	0.576591		0.454592	0.195532
D6REM6	MATR3	S9	_______MSKSFQQSSLSRDSQGHGRDLSAA	Peptide1307		-0.130753	-0.80722	-0.351362	0.202374	-0.235834	0.173408																																					-0.528089	-0.39787
D6REM6	MATR3	S208	GPSLNPVLDYDHGSRSQESGYYDRMDYEDDR	Peptide1308																0.255309	-0.0124365	0.318469	0.297573	0.140458	0.211221		0.208702	0.163965	0.337373	0.0752804	-0.0835863	0.277958		0.195849	-0.17147	0.395384	0.0821579	0.232658	0.116348									0.106461	-0.0756089
D6REM6	MATR3	S596	NRGIDLLKKDKSRKRSYSPDGKESPSDKKSK	Peptide1309		0.708514	-0.0591546	0.559285	0.63273	0.392231	0.260142									0.608683	0.40396	0.782799	0.558503	0.555868	0.607357									0.402171	0.0967229	0.484788	0.146571	0.30055	0.0498451									0.298707	0.13226
D6REM6	MATR3	S598	GIDLLKKDKSRKRSYSPDGKESPSDKKSKTD	Peptide1310		0.688679	0.195084	0.602533	0.488845	0.408209	0.146176									0.611682	0.25866	0.700369	0.649417	0.403871	0.493413		0.517368	0.266878	0.544631	0.332312	0.243342	-0.0115523		0.439288	0.0732371	0.535466	0.23647	0.477559	-0.0142254									0.375624	-0.033452
A0A0S2Z4A4	MLF1	S255	NPGSRELKRREKPQQSPAIEHGRRSNVLGDK	Peptide1311																-0.697231	-0.183524	-0.302822	-0.237007	-0.197865	0.0381895		-0.220071	-1.03543	-0.162713	-0.590155	-0.67461	-0.408213
A0A0S2Z4A4	MLF1	S7	_________MFRMLNSSFEDDPFFSESILAH	Peptide1312																-0.201854	0.0309375	-0.247827	-0.114117	0.306173	-0.421345		-0.560208	-0.281449	-0.429189	-0.29038	-0.131534	-0.769261		-0.555153	-0.0357411	-0.163038	-0.232323	-0.675591	-0.561924
A0A0S2Z4A4	MLF1	S8	________MFRMLNSSFEDDPFFSESILAHR	Peptide1313									-0.162061	0.040265	-0.140706	-0.170294	0.225789	-0.404452		-0.462928	-0.0956894	-0.1963	-0.250829	0.312467	-0.502318		-0.402039	-0.147425	-0.283538	-0.101192	0.230513	-0.542282		-0.287917	0.0943963	-0.0119576	-0.0840817	-0.429035	-0.317975									-0.342592	-0.523219
A0A0S2Z4A4	MLF1	S34	ILAHRENMRQMIRSFSEPFGRDLLSISDGRG	Peptide1314																							-0.573207	-0.454286	-1.52712	-0.197438	-0.498508	-0.504634		-0.441025	0.0316125	-0.894169	-0.609575	-0.95411	-0.516411		-0.327188	-0.850311	-0.907775	-0.163375	-0.742869	-0.651292		-0.57141	-0.842466
A0A0S2Z4G6	TPM1	S186	IIESDLERAEERAELSEGKCAELEEELKTVT	Peptide1315		0.217253	-0.0392438	0.739051	0.54155	0.0837723	0.156713									0.354946	0.599653	0.904336	0.705134	0.516145	0.829128		0.276408	-0.151364	0.510219	0.0922388	-0.17973	-0.115866		0.1381	0.106624	0.769689	-0.0416543	-0.253514	0.17548									0.0679916	-0.18961
A0A0S2Z4G6	TPM1	S283	KAISEELDHALNDMTSM______________	Peptide1316		0.52671	0.595504	-0.0244151	0.209993	0.452424	0.329438		-0.0797876	-0.550612	-0.077822	-0.00718888	-0.511191	-0.1273		0.622801	0.0567049	0.267777	0.361726	0.298363	0.200432		-0.103691	-0.0425984	-0.00795812	0.000304792	0.135593	0.113824		0.00228296	-0.0107157	-0.0213649	-0.133053	0.245368	-0.170351		0.217641	0.246419	0.265525	0.375537	0.916721	0.216694		0.054266	0.176628
A0A0S2Z4G6	TPM1	S61	LQKKLKGTEDELDKYSEALKDAQEKLELAEK	Peptide1317		0.680609	-0.583538	0.907099	0.794592	0.40066	0.665624		0.83082	-0.0288587	1.34043	0.531991	0.750283	0.615094		0.486425	-0.0923681	0.848497	0.298642	0.565245	0.534537		0.584383	0.0298913	1.19652	0.413585	0.638791	0.572632		0.589312	0.0549202	1.18676	0.510365	0.541756	0.633565		0.606202	-0.0306096	0.956937	0.440973	0.211739	0.647245		0.447385	0.181294
A0A0S2Z4G6	TPM1	S174	DRKYEEVARKLVIIESDLERAEERAELSEGK	Peptide1318		-0.663149	-0.100327	-0.0674854	-0.17256	-0.198049	-0.26454		-0.0926849	-0.178246	-0.00360096	-0.555612	-0.067039	-0.347609		-0.770098	0.109977	-0.235649	-0.0312572	0.125802	0.0909863		-0.297852	-0.300331	-0.187322	-0.186255	-0.271075	-0.224105		-0.243473	-0.0943113	0.147194	-0.336073	-0.320745	-0.160365		-0.147419	-0.197932	-0.226835	-0.121933	-0.61918	-0.209185		-0.203965	-0.43056
A0A0S2Z4G6	TPM1	S45	KAAEDRSKQLEDELVSLQKKLKGTEDELDKY	Peptide1319		-0.0899408	-0.620771	0.493427	0.450325	0.0261484	0.230619		0.1338	-0.207558	0.496694	-0.143422	0.209453	0.0686015		-0.495663	-0.00777096	0.360296	0.237621	0.375679	0.33732		0.120932	-0.412237	0.382068	0.0556665	0.0170882	0.0628469		0.0240384	-0.0813618	0.652133	-0.114819	-0.0811339	0.345793		0.212934	-0.131517	0.379983	0.0730774	-0.319337	0.19638		-0.0996725	-0.283122
A0A0S2Z4G6	TPM1	S252	TRAEFAERSVTKLEKSIDDLEDELYAQKLKY	Peptide1320		0.0376166	-0.773018	0.609991	0.628407	0.127125	0.391729		0.206358	-0.455975	0.487876	-0.0606067	0.227499	0.0239109		-0.162218	-0.00587255	0.649437	0.356364	0.520054	0.596934		0.111268	-0.509969	0.517277	0.0465717	0.0435926	0.0286733		0.143006	-0.120393	0.845375	-0.0440833	-0.158039	0.280194		0.426133	-0.162556	0.543268	0.235539	-0.59873	0.357938		-0.0241998	-0.299044
A0A0S2Z4G6	TPM1	S206	AELEEELKTVTNNLKSLEAQAEKYSQKEDRY	Peptide1321		0.385761	-0.0445237	0.479021	0.431337	0.253545	0.139271		0.735113	0.621303	0.853242	0.24688	0.0563207	0.48693		0.529514	0.392208	0.435605	0.347251	0.318112	0.383873		0.568811	0.411237	0.760343	0.366238	0.206717	0.171041		0.550206	0.557452	0.747264	0.327837	-0.0257393	0.424507									0.518453	0.46313
A0A0S2Z4G6	TPM1	S215	VTNNLKSLEAQAEKYSQKEDRYEEEIKVLSD	Peptide1322		0.707676	-0.571433	0.767947	0.831929	0.500942	0.57218		0.701101	0.0139874	1.01072	0.368288	0.589113	0.487188		0.397859	0.0432815	0.74952	0.333918	0.482356	0.468796		0.563635	0.0473444	0.971383	0.405458	0.497421	0.357478		0.696013	0.209936	0.791215	0.422875	0.410839	0.48957		0.672408	0.212179	0.804296	0.446708	0.247708	0.45866		0.803239	0.00341933
A0A1B0GW73	CLN6	S31	PGAQLGASFLQARHGSVSADEAARTAPFHLD	Peptide1323																0.249228	0.423747	0.366595	0.0728574	0.577847	0.153322									-0.167736	-0.00556405	-0.148047	0.254465	-0.178879	0.244924									-0.263081	0.199983
A0A1B0GW73	CLN6	S23	QHLGATGGPGAQLGASFLQARHGSVSADEAA	Peptide1324		0.0235771	0.67853	0.141495	-0.198256	0.439019	0.0730201		0.311017	-0.442956	0.0539257	-0.450255	-0.243926	-0.158869		0.221264	0.0684731	-0.177086	-0.0310386	0.203614	-0.154857		0.0771325	0.213704	-0.0516536	-0.0409145	0.0808901	0.189132		-0.382669	-0.0306931	-0.347669	-0.0949249	0.760065	-0.321777		-0.0751439	0.105379	-0.234286	-0.0599861	1.77668	-0.296714		0.184413	0.277184
A0A494C1M0	SH3D19	S590	ATRRSNKKLPFNRSSSDMDLQKKQSNLATGL	Peptide1325																-0.137929	-0.234802	0.0241062	-0.0990609	-0.205057	-0.106971		0.255023	0.129862	0.184572	-0.150136	-0.0762227	-0.160984		-0.110756	-0.489331	0.0381103	-0.115164	0.705866	-0.219448									0.646299	-0.56931
A0A494C1M0		S10	______MPRGRASRTSIQSELHRDRRRPEIT	Peptide1326		-0.140956	-0.706259	-0.165096	0.26532	-0.28151	0.137659																																					-0.293982	-0.639695
A0A0U1RQK4		S1135	VASRATPAPAPGSTQSPGDRTAGEPETLGQW	Peptide1327																														-0.916003	-0.607159	-0.703275	-0.62807	0.550365	0.806273
A0A0U1RQK4		S1029	LRGNTSHASSSQQVPSPTGRNPTGAPTSLAA	Peptide1328																-0.692262	-0.492031	-0.855724	-0.530045	-0.900053	0.359635		-0.709679	-0.791925	-1.01682	-0.416454	-0.156599	1.66477		-1.10451	-1.10419	-1.04733	-0.783674	1.32899	0.763413		0.132771				0.927009	0.187802
A0A0U1RQK4		S915	VELSKLSGMQAGLSASSPQGPRAAPRLAAAR	Peptide1329		-0.0902359	-1.23904	0.0721236	-0.122535	-0.575385	-0.13831																																					-0.657925	-1.16341
[truncated: 12,341 more rows]
[truncated: 18 more columns]

## Sheet: Blazev - Pre PhosR
Uniprot	Gene Name	Site	Sequence	Peptide #		Pre END Subject 1	0 hr END Subject 1	3 hr END Subject 1	Pre RE Subject 1	0 hr RE Subject 1	3 hr RE Subject 1		Pre END Subject 2	0 hr END Subject 2	3 hr END Subject 2	Pre RE Subject 2	0 hr RE Subject 2	3 hr RE Subject 2		Pre END Subject 3	0 hr END Subject 3	3 hr END Subject 3	Pre RE Subject 3	0 hr RE Subject 3	3 hr RE Subject 3		Pre END Subject 4	0 hr END Subject 4	3 hr END Subject 4	Pre RE Subject 4	0 hr RE Subject 4	3 hr RE Subject 4		Pre END Subject 5	0 hr END Subject 5	3 hr END Subject 5	Pre RE Subject 5	0 hr RE Subject 5	3 hr RE Subject 5		Pre END Subject 6	0 hr END Subject 6	3 hr END Subject 6	Pre RE Subject 6	0 hr RE Subject 6	3 hr RE Subject 6		Pre END Subject 7	0 hr END Subject 7
[truncated: 13,670 more rows]
[truncated: 10 more columns]
