# Supplementary material for: Identification of a Resistance Exercise-Specific Signaling Pathway that Drives Skeletal Muscle Growth
Source: Research Square preprint supplement (doi:10.21203/rs.3.rs-4997138/v1), 2024-11-12
Supplement: Supplementary file 8 [file c8a9c85b06e098ade9df6920.xlsx]

## Sheet: Antibody List
Primary Antibody	Source Species	Vendor	Product #	Dilution
P-MKK3b/6(S218/S207)	Rabbit	Cell Signaling	9236P	1:1000
T-MKK3b	Rabbit	Cell Signaling	8535S	1:1000
T-MKK3b	Rabbit	Cell Signaling	9238S	1:1000
T-MKK6	Rabbit	Cell Signaling	8550S	1:1000
P-MKK4(S257)	Rabbit	Cell Signaling	4514P	1:1000
T-MKK4	Rabbit	Cell Signaling	3346S	1:1000
P-p38(T180_2)	Rabbit	Cell Signaling	9211S	1:1000
T-p38	Rabbit	Cell Signaling	8690S	1:1000
P-MK2(T222)	Rabbit	Cell Signaling	3316T	1:1000
P-MK2(T334)	Rabbit	Cell Signaling	3007T	1:1000
T-MK2	Rabbit	Cell Signaling	12155	1:1000
P-HSPB1(S82)	Rabbit	Cell Signaling	9709	1:1000
T-HSPB1	Rabbit	Cell Signaling	50353S	1:1000
P-CRAB(S59)	Rabbit	Enzo Life Sciences Inc	ADI-SPA-227-D	1:1000
T-CRYAB	Mouse IgG1	Enzo Life Sciences Inc	ADI-SPA-222-D	1:1000
P-p70(T389)	Rabbit	Cell Signaling	9234	1:1000
T-p70	Rabbit	Cell Signaling	2708	1:1000
Total OXPHOS	Mouse	Abcam	ab110413	1:1000
CytoC	Rabbit	Cell Signaling	4280	1:1000
NRF1	Mouse IgG2a	Santa Cruz	sc-28379	1:1000
HSP60	Mouse IgG3	Santa Cruz	sc-13115	1:1000
TFAM	Mouse IgG2b	Santa Cruz	sc-166965	1:1000
No-Stain™ Protein Labeling Reagent		Invitrogen	A44449	1:1000
Myosin	Mouse IgG2b	DSHB	MF 20	1:1000
LDH	Rabbit	Cell Signaling	3558	1:1000
FLAG-Tag	Rabbit	Cell Signaling	2368P	1:1000
P-JNK(T183_5)	Rabbit	Cell Signaling	4668T	1:1000
Anti-laminin	Rabbit	MilliporeSigma	L9393	1:500
Anti-Type I MHC	Mouse IgG2b	Developmental Studies Hybridoma Bank	BA-D5-s	1:100
Anti-Type IIB MHC	Mouse IgM	Developmental Studies Hybridoma Bank	BF-F3-s	1:10
Anti-CD31	Rat	BD Biosciences	550274	1:25
P-S6(240_4)	Rabbit	Cell Signaling	5364	1:300
Anti-dystrophin	Rabbit	Invitrogen	PA532388	1:100
Secondary Antibody	Source Species	Vendor	Product #	Dilution
Anti-mouse IgG(H+L), Peroxidase	Horse	Vector	PI-2000	1:25000
Anti-rabbit IgG (H+L), Peroxidase	Goat	Vector	PI-1000	1:1000
Alexa 568 Anti-rabbit IgG	Goat	Invitrogen	A11011	1:5000
Alexa 647 Anti-mouse IgG2b	Goat	Jackson Immunoresearch	115-605-207	1:100
Alexa 488 Anti-mouse IgG1	Goat	Jackson Immunoresearch	115-545-205	1:3000
Alexa 350 Anti-mouse IgM	Goat	Invitrogen	A-31552	1:500
Alexa 488 Anti-rat	Goat	Jackson Immunoresearch	112-545-167	1:1000
Alexa 568 anti-rabbit IgG	Goat	Invitrogen	A11011	1:5000
Anti-rabbit Alexa Fluor® 405 Plus	Goat	Invitrogen	A48254	1:2000
Anti-rabbit CF®640R	Goat	Biotium	20202	1:2000
WGA-640R		Biotium	29026-1	1:30
Hoescht		BD Pharmingen	561908	1:3000
