# Supplementary material for: Identification of a Resistance Exercise-Specific Signaling Pathway that Drives Skeletal Muscle Growth
Source: Research Square preprint supplement (doi:10.21203/rs.3.rs-4997138/v1), 2024-11-12
Supplement: Supplementary file 9 [file d24616d1b8948902fd65d141.xlsx]

## Sheet: Inferred Kinase Activity
mS - mean log2(fold change) vs. pre-exercise of all the kinase's substrates		0 hr END						0 hr RE						3 hr END						3 hr RE
m - total # of substrates		0hr END Kinase	mS	m	z.score	FDR		0hr RE Kinase	mS	m	z.score	FDR		3hr END Kinase	mS	m	z.score	FDR		3hr RE Kinase	mS	m	z.score	FDR
z.score - normalized score for each kinase		MAPKAPK2	0.570775	5	4.71874	4.81819e-05		MAPKAPK2	1.29182	5	6.87954	6.48499e-10		MAPKAPK2	-0.0671024	5	-1.78433	0.297478		MAPKAPK2	0.861455	5	5.65965	1.63815e-06
FDR - P-value adjusted for multiple hypothesis testing using the Benjamini & Hochberg method		MAPK14	-0.0647896	18	1.92984	0.134073		MAPK14	0.497877	18	3.99377	0.000638489		MAPK14	0.0751871	18	-1.18021	0.385813		MAPK14	0.465667	18	5.43652	2.93392e-06
		MAPKAPK5	0.312796	8	4.06825	0.000568415		MAPKAPK5	0.786012	8	4.85435	2.60895e-05		MAPKAPK5	-0.132899	8	-2.93687	0.0716133		MAPKAPK5	0.657518	8	5.33768	3.38915e-06
		DMPK	0.0762035	21	3.76735	0.00161987		DMPK	0.473334	21	4.01127	0.000638489		DMPK	-0.0614309	21	-3.56185	0.0397712		DMPK	0.405098	21	4.99572	1.51205e-05
		MAPKAPK3	0.178338	9	3.26439	0.00740485		MAPKAPK3	0.710646	9	4.54073	8.64935e-05		MAPKAPK3	-0.129496	9	-3.07773	0.0716133		MAPKAPK3	0.583607	9	4.96136	1.51205e-05
		MAPK3	-0.229781	386	0.493621	0.445228		MAPK3	0.20477	386	3.00671	0.0177008		MAPK3	0.174219	386	1.64247	0.32717		MAPK3	0.130988	386	4.41415	0.000136901
		MAPK8	-0.204767	48	0.625462	0.434514		MAPK8	0.262769	48	2.14098	0.0829942		MAPK8	0.223844	48	1.83516	0.287202		MAPK8	0.262419	48	4.43167	0.000136901
		MAPK1	-0.206795	228	1.28338	0.331243		MAPK1	0.203444	228	2.25697	0.0710561		MAPK1	0.162897	228	0.637786	0.494272		MAPK1	0.147847	228	4.19625	0.000325639
		CHUK	-0.166038	55	1.41762	0.278906		CHUK	0.245575	55	1.94884	0.114069		CHUK	0.122292	55	-0.786829	0.475401		CHUK	0.232374	55	4.04028	0.000576579
		CDK4	-0.242294	20	-0.0333891	0.488571		CDK4	0.283769	20	1.63458	0.190187		CDK4	0.25228	20	1.64916	0.32717		CDK4	0.342413	20	3.99019	0.000648195
		IKBKB	-0.192634	61	0.951907	0.363794		IKBKB	0.230402	61	1.73367	0.169085		IKBKB	0.121385	61	-0.854517	0.466239		IKBKB	0.217288	61	3.88293	0.000928838
		MAP2K3	0.02415	18	2.91267	0.0184294		MAP2K3	0.51668	18	4.20832	0.000347323		MAP2K3	0.0470494	18	-1.61631	0.32717		MAP2K3	0.32174	18	3.50849	0.0037439
		ARAF	-0.186524	26	0.702615	0.430479		ARAF	0.365926	26	2.99039	0.0177008		ARAF	0.135235	26	-0.299892	0.494272		ARAF	0.271491	26	3.40768	0.00505417
		MAP2K6	-0.0591871	31	2.61384	0.0386769		MAP2K6	0.457802	31	4.64106	6.23915e-05		MAP2K6	0.039372	31	-2.2773	0.166736		MAP2K6	0.223857	31	2.88354	0.026543
		MAP2K4	0.0342591	19	3.10726	0.0119963		MAP2K4	0.606202	19	5.37311	2.08951e-06		MAP2K4	0.00478856	19	-2.33354	0.166736		MAP2K4	0.266737	19	2.84763	0.0279823
		RPS6KA3	0.0893797	17	3.53112	0.0034377		RPS6KA3	0.399617	17	2.79164	0.0233173		RPS6KA3	0.123179	17	-0.424098	0.494272		RPS6KA3	0.276701	17	2.8233	0.0285195
		PRKG1	-0.185181	37	0.859441	0.387219		PRKG1	0.213049	37	1.06633	0.347387		PRKG1	0.0818689	37	-1.54361	0.348677		PRKG1	0.201558	37	2.72198	0.0368856
		CDK5	-0.203962	48	0.63998	0.434514		CDK5	0.2802	48	2.46578	0.0476297		CDK5	0.263574	48	2.84071	0.0810245		CDK5	0.178993	48	2.6067	0.0470161
		ROCK1	-0.264392	80	-0.581591	0.434514		ROCK1	0.213818	80	1.58647	0.203191		ROCK1	0.189639	80	1.25156	0.382716		ROCK1	0.147593	80	2.47847	0.0647732
		CSNK1D	-0.340678	79	-2.34402	0.0792435		CSNK1D	0.303657	79	3.72407	0.00162863		CSNK1D	0.222049	79	2.29605	0.166736		CSNK1D	0.140626	79	2.26741	0.0905517
		MAPK9	-0.206215	13	0.311898	0.471866		MAPK9	0.184659	13	0.356772	0.484158		MAPK9	0.178015	13	0.35141	0.494272		MAPK9	0.258842	13	2.26559	0.0905517
		MAPK10	-0.291518	9	-0.407033	0.456252		MAPK10	0.0952969	9	-0.424161	0.484158		MAPK10	0.227147	9	0.830849	0.466239		MAPK10	0.296258	9	2.23951	0.0935608
		PKD1	-0.158623	28	1.11369	0.341206		PKD1	0.331559	28	2.61417	0.0333467		PKD1	0.263867	28	2.17529	0.199856		PKD1	0.192089	28	2.2097	0.0976536
		MAPK12	-0.184669	20	0.637844	0.434514		MAPK12	0.233637	20	1.03161	0.354822		MAPK12	0.104849	20	-0.759446	0.483393		MAPK12	0.214831	20	2.18867	0.0997117
		CDK2	-0.271988	89	-0.800097	0.403263		CDK2	0.205219	89	1.45513	0.227946		CDK2	0.207168	89	1.92421	0.255109		CDK2	0.127675	89	2.02088	0.141684
		CSNK2A1	-0.327216	168	-2.96376	0.016411		CSNK2A1	0.21238	168	2.24888	0.0710561		CSNK2A1	0.219151	168	3.21109	0.0714061		CSNK2A1	0.0158721	168	-1.79902	0.216044
		CAMK1	-0.285512	18	-0.509268	0.445228		CAMK1	0.209977	18	0.708703	0.474154		CAMK1	0.170901	18	0.303251	0.494272		CAMK1	-0.0693466	18	-1.73045	0.23746
		PRKD1	0.0611596	5	1.75066	0.183839		PRKD1	0.379995	5	1.39598	0.247429		PRKD1	0.0362544	5	-0.940051	0.461194		PRKD1	0.29627	5	1.66931	0.26323
		AKT1	-0.219803	100	0.511129	0.445228		AKT1	0.174918	100	0.727516	0.474154		AKT1	0.135804	100	-0.56737	0.494272		AKT1	0.108909	100	1.5496	0.319355
		EGFR	0.231767	8	3.4713	0.00399551		EGFR	0.141255	8	-0.050304	0.496703		EGFR	0.0730788	8	-0.808589	0.466239		EGFR	-0.104209	8	-1.46498	0.367528
		PDK1	-0.270573	63	-0.643901	0.434514		PDK1	0.124221	63	-0.504779	0.484158		PDK1	0.173412	63	0.640132	0.494272		PDK1	0.116401	63	1.41772	0.388149
		GSK3A	-0.218165	111	0.583474	0.434514		GSK3A	0.187972	111	1.13637	0.321239		GSK3A	0.197792	111	1.78804	0.297478		GSK3A	0.101432	111	1.38387	0.390676
		PDK2	-0.10199	7	0.94711	0.363794		PDK2	0.35442	7	1.46976	0.224937		PDK2	0.288215	7	1.32298	0.382716		PDK2	0.220384	7	1.34122	0.399298
		CDK6	-0.268147	11	-0.248097	0.471866		CDK6	0.0539693	11	-0.837569	0.425936		CDK6	0.184899	11	0.406659	0.494272		CDK6	-0.0689487	11	-1.34858	0.399298
		AURKB	-0.371778	39	-2.15282	0.11007		AURKB	0.312763	39	2.76955	0.0233173		AURKB	0.161024	39	0.221036	0.494272		AURKB	-0.00798363	39	-1.33718	0.399298
		AURKA	-0.247613	23	-0.102258	0.475783		AURKA	0.22952	23	1.05317	0.350717		AURKA	0.322872	23	3.00529	0.0716133		AURKA	0.145118	23	1.29145	0.409843
		MTOR	-0.578493	16	-3.53258	0.0034377		MTOR	-0.229424	16	-4.05886	0.000591763		MTOR	0.199888	16	0.709472	0.493034		MTOR	-0.0405019	16	-1.26718	0.410183
		MAP2K2	0.0571009	16	3.0894	0.0120339		MAP2K2	0.303779	16	1.67728	0.183575		MAP2K2	0.0713288	16	-1.16909	0.385813		MAP2K2	0.160482	16	1.27119	0.410183
		RAF1	-0.290054	84	-1.20855	0.33559		RAF1	0.208168	84	1.48637	0.224477		RAF1	0.147414	84	-0.131296	0.49459		RAF1	0.103232	84	1.25596	0.410655
		ADRBK1	-0.284174	82	-1.05541	0.349487		ADRBK1	0.21586	82	1.65591	0.1885		ADRBK1	0.182986	82	1.04703	0.427048		ADRBK1	0.102463	82	1.21892	0.415877
		CAMK2D	-0.310728	28	-0.982701	0.362696		CAMK2D	0.234712	28	1.23592	0.298371		CAMK2D	0.216644	28	1.26245	0.382716		CAMK2D	-0.0125226	28	-1.20885	0.415877
		PLK1	-0.27595	55	-0.705487	0.430479		PLK1	0.137801	55	-0.200775	0.485877		PLK1	0.214	55	1.69774	0.322408		PLK1	0.00825892	55	-1.20762	0.415877
		RPS6KB2	-0.0607105	12	1.61251	0.226809		RPS6KB2	0.242559	12	0.8822	0.416835		RPS6KB2	-0.00182716	12	-1.93823	0.255109		RPS6KB2	0.1625	12	1.12295	0.420058
		EIF2AK2	-0.15515	24	1.07538	0.343699		EIF2AK2	0.321856	24	2.29241	0.0695072		EIF2AK2	0.144981	24	-0.113723	0.49459		EIF2AK2	0.131692	24	1.11156	0.420058
		SRC	0.146028	8	2.83966	0.0221703		SRC	0.106351	8	-0.315815	0.484158		SRC	0.129241	8	-0.228288	0.494272		SRC	-0.0673761	8	-1.13603	0.420058
		PRKACB	-0.267034	21	-0.329513	0.471866		PRKACB	0.239016	21	1.12338	0.324343		PRKACB	0.154596	21	0.0545832	0.49459		PRKACB	-0.00746327	21	-0.973695	0.468789
		AKT2	-0.20298	38	0.585196	0.434514		AKT2	0.0147696	38	-2.20663	0.0738175		AKT2	0.133478	38	-0.402124	0.494272		AKT2	0.0688426	38	0.175395	0.48805
		AKT3	-0.207174	20	0.375697	0.464507		AKT3	0.112036	20	-0.430965	0.484158		AKT3	0.166852	20	0.253512	0.494272		AKT3	0.0639604	20	0.0583059	0.48805
		CDC42BPA	-0.106356	11	1.14955	0.341206		CDC42BPA	0.390113	11	2.16082	0.0808918		CDC42BPA	0.0824456	11	-0.834667	0.466239		CDC42BPA	0.0134856	11	-0.485331	0.48805
		CDC42BPB	0.0529956	8	2.15429	0.11007		CDC42BPB	0.462068	8	2.39012	0.0568454		CDC42BPB	0.0828752	8	-0.707367	0.493034		CDC42BPB	0.0322517	8	-0.2463	0.48805
		GRK5	-0.213653	7	0.177617	0.471866		GRK5	0.101825	7	-0.327625	0.484158		GRK5	0.148161	7	-0.0306799	0.49459		GRK5	0.0363524	7	-0.196137	0.48805
		LATS1	-0.354799	5	-0.671941	0.434514		LATS1	0.227579	5	0.479373	0.484158		LATS1	0.160096	5	0.0715662	0.49459		LATS1	0.0741105	5	0.100815	0.48805
		PRKACA	-0.181288	54	1.11279	0.341206		PRKACA	0.29487	54	2.90527	0.0190771		PRKACA	0.0637252	54	-2.35187	0.166736		PRKACA	0.0360577	54	-0.551599	0.48805
		PRKCA	-0.280469	129	-1.21415	0.33559		PRKCA	0.211584	129	1.9463	0.114069		PRKCA	0.146828	129	-0.186996	0.49459		PRKCA	0.0468948	129	-0.463918	0.48805
		PRKCD	-0.283455	56	-0.858159	0.387219		PRKCD	0.145647	56	-0.0446884	0.496703		PRKCD	0.20306	56	1.41402	0.369443		PRKCD	0.0499581	56	-0.233282	0.48805
		PRKCE	-0.340008	61	-2.0461	0.111215		PRKCE	0.222397	61	1.56553	0.204604		PRKCE	0.152543	61	0.0344516	0.49459		PRKCE	0.0464799	61	-0.329246	0.48805
		PRKCH	-0.327643	27	-1.19393	0.339187		PRKCH	0.25861	27	1.54762	0.205392		PRKCH	0.193971	27	0.809318	0.466239		PRKCH	0.0502749	27	-0.156784	0.48805
		ROCK2	-0.312957	42	-1.24118	0.33559		ROCK2	0.298142	42	2.61924	0.0333467		ROCK2	0.164099	42	0.30218	0.494272		ROCK2	0.0886616	42	0.589943	0.48805
		RPS6KA1	0.0394589	7	1.92187	0.134073		RPS6KA1	0.343015	7	1.38861	0.247429		RPS6KA1	0.0807043	7	-0.682663	0.494272		RPS6KA1	0.0815763	7	0.181654	0.48805
		RPS6KA2	-0.227261	55	0.23501	0.471866		RPS6KA2	0.068796	55	-1.57713	0.203191		RPS6KA2	0.169367	55	0.488539	0.494272		RPS6KA2	0.0433221	55	-0.386578	0.48805
		RPS6KB1	-0.163396	28	1.0479	0.349734		RPS6KB1	0.107772	28	-0.57061	0.480217		RPS6KB1	0.102747	28	-0.939222	0.461194		RPS6KB1	0.0485471	28	-0.18853	0.48805
		ATR	-0.0624139	8	1.30406	0.326081		ATR	0.298992	8	1.1496	0.321239		ATR	0.266897	8	1.19405	0.385813		ATR	0.0404698	8	-0.172908	0.48805
		BCKDK	-0.248418	5	-0.0523649	0.488159		BCKDK	0.108296	5	-0.237975	0.485877		BCKDK	0.325281	5	1.4209	0.369443		BCKDK	-0.0478222	5	-0.760058	0.48805
		PRKDC	-0.282064	43	-0.728227	0.423355		PRKDC	0.224063	43	1.34378	0.261272		PRKDC	0.256863	43	2.52793	0.154893		PRKDC	0.0729479	43	0.271578	0.48805
		CAMK2A	-0.11874	223	4.69418	4.81819e-05		CAMK2A	0.306256	223	6.36125	1.08067e-08		CAMK2A	0.144362	223	-0.380416	0.494272		CAMK2A	0.0550128	223	-0.227189	0.48805
		CAMK2B	-0.249116	31	-0.140508	0.471866		CAMK2B	0.253697	31	1.58473	0.203191		CAMK2B	0.172927	31	0.439172	0.494272		CAMK2B	0.103114	31	0.760905	0.48805
		CAMK2G	-0.262566	11	-0.199885	0.471866		CAMK2G	0.180414	11	0.29031	0.484158		CAMK2G	0.131499	11	-0.24033	0.494272		CAMK2G	-0.00628346	11	-0.692354	0.48805
		MARK1	-0.408291	5	-0.983491	0.362696		MARK1	0.146283	5	-0.00952794	0.49747		MARK1	0.280812	5	1.05765	0.427048		MARK1	0.0910997	5	0.220763	0.48805
		MARK3	-0.381897	11	-1.23074	0.33559		MARK3	0.0792912	11	-0.611698	0.474794		MARK3	0.0384688	11	-1.36749	0.377938		MARK3	0.0306588	11	-0.305493	0.48805
		MARK4	-0.216168	13	0.218426	0.471866		MARK4	0.384319	13	2.29288	0.0695072		MARK4	0.150028	13	-0.0172174	0.49459		MARK4	0.0663911	13	0.07468	0.48805
		PRKAA1	-0.0552188	30	2.62795	0.0386552		PRKAA1	0.249601	30	1.49862	0.222602		PRKAA1	0.17064	30	0.386272	0.494272		PRKAA1	0.0140001	30	-0.792601	0.48805
		PRKAA2	-0.197661	70	0.910174	0.370872		PRKAA2	0.0189054	70	-2.90187	0.0190771		PRKAA2	0.166004	70	0.448335	0.494272		PRKAA2	0.0499024	70	-0.262289	0.48805
		STK11	-0.189842	13	0.465665	0.452792		STK11	0.162452	13	0.141429	0.490949		STK11	0.243681	13	1.21633	0.382716		STK11	0.110697	13	0.579069	0.48805
		CSNK1A1	-0.314799	83	-1.78852	0.173015		CSNK1A1	0.229217	83	1.99324	0.109629		CSNK1A1	0.206662	83	1.84135	0.287202		CSNK1A1	0.0717141	83	0.34182	0.48805
		CSNK1E	-0.425534	17	-1.99864	0.120243		CSNK1E	0.111609	17	-0.402069	0.484158		CSNK1E	0.228069	17	1.15578	0.385813		CSNK1E	0.0856311	17	0.335874	0.48805
		CSNK1G2	-0.514447	9	-2.14898	0.11007		CSNK1G2	0.229248	9	0.65661	0.474154		CSNK1G2	0.240623	9	0.978543	0.45978		CSNK1G2	0.106044	9	0.437737	0.48805
		CSNK1G3	-0.812349	5	-3.33678	0.00610234		CSNK1G3	0.177348	5	0.177288	0.485877		CSNK1G3	0.293092	5	1.15796	0.385813		CSNK1G3	0.151306	5	0.645833	0.48805
		CDK3	-0.211484	5	0.162745	0.471866		CDK3	0.121398	5	-0.159185	0.486291		CDK3	0.152995	5	0.0135617	0.49459		CDK3	0.0815595	5	0.153407	0.48805
		CDK7	-0.335185	38	-1.5375	0.235273		CDK7	0.217762	38	1.15878	0.321239		CDK7	0.211026	38	1.3442	0.382716		CDK7	0.0733265	38	0.262669	0.48805
		CSNK2A2	-0.478281	41	-3.98357	0.000733194		CSNK2A2	0.161871	41	0.241161	0.485877		CSNK2A2	0.25693	41	2.47002	0.162127		CSNK2A2	0.0388441	41	-0.424305	0.48805
		GSK3B	-0.231886	122	0.216947	0.471866		GSK3B	0.113904	122	-1.00893	0.363495		GSK3B	0.188383	122	1.49489	0.369443		GSK3B	0.062357	122	0.0880877	0.48805
		HIPK1	-0.143604	5	0.558088	0.434514		HIPK1	0.160971	5	0.0788018	0.492566		HIPK1	0.306389	5	1.26658	0.382716		HIPK1	0.107193	5	0.334384	0.48805
		ICK	-0.022513	8	1.59801	0.226809		ICK	0.309717	8	1.23119	0.298371		ICK	0.268908	8	1.21483	0.382716		ICK	0.0268772	8	-0.294297	0.48805
		NEK1	-0.172316	33	1.00416	0.362263		NEK1	0.225177	33	1.19441	0.313627		NEK1	0.152146	33	0.0170085	0.49459		NEK1	0.0247973	33	-0.635446	0.48805
		MAP2K1	-0.189429	53	0.94807	0.363794		MAP2K1	0.173416	53	0.500237	0.484158		MAP2K1	0.139377	53	-0.318034	0.494272		MAP2K1	0.0441014	53	-0.361572	0.48805
		MAP2K5	-0.423757	11	-1.59236	0.226809		MAP2K5	0.152673	11	0.042862	0.496703		MAP2K5	0.313451	11	1.9642	0.254608		MAP2K5	0.095654	11	0.375137	0.48805
		MAP2K7	-0.211764	12	0.249593	0.471866		MAP2K7	0.42842	12	2.6138	0.0333467		MAP2K7	0.133669	12	-0.223554	0.494272		MAP2K7	0.00956523	12	-0.549792	0.48805
		PAK1	-0.236624	96	0.0715432	0.482655		PAK1	0.263678	96	3.05177	0.0163798		PAK1	0.160463	96	0.326715	0.494272		PAK1	0.0647086	96	0.150891	0.48805
		PAK2	-0.225895	49	0.246726	0.471866		PAK2	0.435369	49	5.41259	2.08951e-06		PAK2	0.128453	49	-0.585143	0.494272		PAK2	0.0668219	49	0.154509	0.48805
		PAK4	-0.186883	29	0.737007	0.42204		PAK4	0.193723	29	0.664132	0.474154		PAK4	0.215105	29	1.25453	0.382716		PAK4	0.0398072	29	-0.340474	0.48805
		ERBB2	-0.195602	5	0.255245	0.471866		ERBB2	0.0997963	5	-0.289092	0.484158		ERBB2	0.148779	5	-0.020883	0.49459		ERBB2	0.0213904	5	-0.271401	0.48805
		ATM	-0.217066	25	0.291213	0.471866		ATM	0.244086	25	1.29388	0.278108		ATM	0.166249	25	0.272407	0.494272		ATM	0.0635668	25	0.0589744	0.48805
		TGFBR2	-0.119032	18	1.33043	0.319432		TGFBR2	0.390675	18	2.77055	0.0233173		TGFBR2	0.205024	18	0.832111	0.466239		TGFBR2	0.118327	18	0.783607	0.48805
		CSNK1G1	-0.456824	13	-2.04161	0.111215		CSNK1G1	0.201847	13	0.523444	0.484158		CSNK1G1	0.35805	13	2.72275	0.0998873		CSNK1G1	0.0641274	13	0.0489098	0.489562

## Sheet: Kinase Substrate Links
Kinase - Gene name for each kinase		0 hr END						0 hr RE						3 hr END						3 hr RE
Substrate - Gene name for each substrate linked to that kinase		Kinase	Substrate	Site	Source	log2(fold change)		Kinase	Substrate	Site	Source	log2(fold change)		Kinase	Substrate	Site	Source	log2(fold change)		Kinase	Substrate	Site	Source	log2(fold change)
Site - Substrate's specific amino acid residue		ABL1	STAT5B	Y699	NetworKIN	2.4341		ABL1	STAT5B	Y699	NetworKIN	0.320074		ABL1	STAT5B	Y699	NetworKIN	-0.40952		ABL1	STAT5B	Y699	NetworKIN	-0.192927
Source - Source database (i.e., NetworKIN or PhosphoSitePlus)		ACTR2	RALBP1	S29	NetworKIN	-0.23029		ACTR2	RALBP1	S29	NetworKIN	-0.0559788		ACTR2	RALBP1	S29	NetworKIN	0.113793		ACTR2	RALBP1	S29	NetworKIN	-0.276344
log2(fold change) vs. pre-exercise		ACTR2	RALBP1	S463	NetworKIN	-0.303863		ACTR2	RALBP1	S463	NetworKIN	0.343468		ACTR2	RALBP1	S463	NetworKIN	0.379396		ACTR2	RALBP1	S463	NetworKIN	0.0789378
		ACTR2	RALBP1	S62	NetworKIN	-0.944775		ACTR2	RALBP1	S62	NetworKIN	0.201429		ACTR2	RALBP1	S62	NetworKIN	0.26437		ACTR2	RALBP1	S62	NetworKIN	0.137594
		ACVR2B	GJA1	S364	NetworKIN	-0.396878		ACVR2B	GJA1	S364	NetworKIN	0.120775		ACVR2B	GJA1	S364	NetworKIN	-0.163518		ACVR2B	GJA1	S364	NetworKIN	-0.0740805
		ADRBK1	RPLP2	S102	NetworKIN	-0.317135		ADRBK1	RPLP2	S102	NetworKIN	0.234016		ADRBK1	RPLP2	S102	NetworKIN	0.345615		ADRBK1	RPLP2	S102	NetworKIN	0.0232729
		ADRBK1	RPLP2	S105	NetworKIN	-0.364578		ADRBK1	RPLP2	S105	NetworKIN	0.229282		ADRBK1	RPLP2	S105	NetworKIN	0.365796		ADRBK1	RPLP2	S105	NetworKIN	0.0353029
		ADRBK1	EGFR	S1166	NetworKIN	-0.742695		ADRBK1	EGFR	S1166	NetworKIN	0.181343		ADRBK1	EGFR	S1166	NetworKIN	0.0455547		ADRBK1	EGFR	S1166	NetworKIN	-0.0388756
		ADRBK1	NOS3	S1177	NetworKIN	-0.0131306		ADRBK1	NOS3	S1177	NetworKIN	0.327432		ADRBK1	NOS3	S1177	NetworKIN	0.293683		ADRBK1	NOS3	S1177	NetworKIN	0.281374
		ADRBK1	NOS3	S1179	NetworKIN	0.0407712		ADRBK1	NOS3	S1179	NetworKIN	-0.127781		ADRBK1	NOS3	S1179	NetworKIN	-0.00861523		ADRBK1	NOS3	S1179	NetworKIN	-0.227752
		ADRBK1	IRS1	S1222	NetworKIN	-0.550182		ADRBK1	IRS1	S1222	NetworKIN	0.0800258		ADRBK1	IRS1	S1222	NetworKIN	-0.124302		ADRBK1	IRS1	S1222	NetworKIN	0.000435909
		ADRBK1	MTOR	S1261	NetworKIN	0.846938		ADRBK1	MTOR	S1261	NetworKIN	0.611645		ADRBK1	MTOR	S1261	NetworKIN	0.184585		ADRBK1	MTOR	S1261	NetworKIN	-0.263957
		ADRBK1	LYN	S13	NetworKIN	-0.87172		ADRBK1	LYN	S13	NetworKIN	0.377426		ADRBK1	LYN	S13	NetworKIN	0.549313		ADRBK1	LYN	S13	NetworKIN	0.203068
		ADRBK1	PXN	S130	NetworKIN	0.134353		ADRBK1	PXN	S130	NetworKIN	0.244504		ADRBK1	PXN	S130	NetworKIN	0.271262		ADRBK1	PXN	S130	NetworKIN	0.474685
		ADRBK1	MYLPF	S15	NetworKIN	-0.473482		ADRBK1	MYLPF	S15	NetworKIN	0.484913		ADRBK1	MYLPF	S15	NetworKIN	0.42383		ADRBK1	MYLPF	S15	NetworKIN	-0.0714735
		ADRBK1	SRC	S17	NetworKIN	-0.963667		ADRBK1	SRC	S17	NetworKIN	0.12108		ADRBK1	SRC	S17	NetworKIN	-0.415743		ADRBK1	SRC	S17	NetworKIN	-0.00328094
		ADRBK1	TPM1	S174	NetworKIN	0.165028		ADRBK1	TPM1	S174	NetworKIN	-0.0505616		ADRBK1	TPM1	S174	NetworKIN	0.151142		ADRBK1	TPM1	S174	NetworKIN	0.0754178
		ADRBK1	CAV2	S18	NetworKIN	-0.539708		ADRBK1	CAV2	S18	NetworKIN	-0.0193082		ADRBK1	CAV2	S18	NetworKIN	0.18474		ADRBK1	CAV2	S18	NetworKIN	0.0452571
		ADRBK1	CAV2	S20	NetworKIN	-0.265725		ADRBK1	CAV2	S20	NetworKIN	0.314066		ADRBK1	CAV2	S20	NetworKIN	0.175747		ADRBK1	CAV2	S20	NetworKIN	0.0494448
		ADRBK1	CIR1	S202	NetworKIN	-0.525648		ADRBK1	CIR1	S202	NetworKIN	0.2406		ADRBK1	CIR1	S202	NetworKIN	0.596659		ADRBK1	CIR1	S202	NetworKIN	0.192097
		ADRBK1	PTRF	S202	NetworKIN	-0.372603		ADRBK1	PTRF	S202	NetworKIN	0.352702		ADRBK1	PTRF	S202	NetworKIN	0.255949		ADRBK1	PTRF	S202	NetworKIN	0.0413826
		ADRBK1	YWHAZ	S207	NetworKIN	-0.494625		ADRBK1	YWHAZ	S207	NetworKIN	0.570137		ADRBK1	YWHAZ	S207	NetworKIN	0.665094		ADRBK1	YWHAZ	S207	NetworKIN	0.242573
		ADRBK1	PRKCA	S226	NetworKIN	-0.366373		ADRBK1	PRKCA	S226	NetworKIN	0.287196		ADRBK1	PRKCA	S226	NetworKIN	0.302473		ADRBK1	PRKCA	S226	NetworKIN	0.144232
		ADRBK1	IGF2R	S2409	NetworKIN	-0.0205041		ADRBK1	IGF2R	S2409	NetworKIN	0.275884		ADRBK1	IGF2R	S2409	NetworKIN	0.256789		ADRBK1	IGF2R	S2409	NetworKIN	-0.037122
		ADRBK1	ADRB2	S246	NetworKIN	0.0153979		ADRBK1	ADRB2	S246	NetworKIN	0.273078		ADRBK1	ADRB2	S246	NetworKIN	0.382648		ADRBK1	ADRB2	S246	NetworKIN	0.148041
		ADRBK1	MTOR	S2478	NetworKIN	-0.0634422		ADRBK1	MTOR	S2478	NetworKIN	0.471664		ADRBK1	MTOR	S2478	NetworKIN	0.711956		ADRBK1	MTOR	S2478	NetworKIN	0.287632
		ADRBK1	TPM1	S252	NetworKIN	-0.451067		ADRBK1	TPM1	S252	NetworKIN	-0.165036		ADRBK1	TPM1	S252	NetworKIN	0.352059		ADRBK1	TPM1	S252	NetworKIN	0.0563045
		ADRBK1	PXN	S258	NetworKIN	-0.492495		ADRBK1	PXN	S258	NetworKIN	0.297687		ADRBK1	PXN	S258	NetworKIN	0.219456		ADRBK1	PXN	S258	NetworKIN	0.00413909
		ADRBK1	RAF1	S259	NetworKIN	-0.209507		ADRBK1	RAF1	S259	NetworKIN	0.134276		ADRBK1	RAF1	S259	NetworKIN	0.0495004		ADRBK1	RAF1	S259	NetworKIN	0.0638142
		ADRBK1	CAMK2D	S276	NetworKIN	-0.306649		ADRBK1	CAMK2D	S276	NetworKIN	-0.197038		ADRBK1	CAMK2D	S276	NetworKIN	-0.0797914		ADRBK1	CAMK2D	S276	NetworKIN	-0.159815
		ADRBK1	CAMK2D	S280	NetworKIN	-0.450589		ADRBK1	CAMK2D	S280	NetworKIN	-0.001264		ADRBK1	CAMK2D	S280	NetworKIN	-0.11103		ADRBK1	CAMK2D	S280	NetworKIN	0.0656312
		ADRBK1	TPM1	S283	NetworKIN	-0.0259459		ADRBK1	TPM1	S283	NetworKIN	0.201651		ADRBK1	TPM1	S283	NetworKIN	0.138882		ADRBK1	TPM1	S283	NetworKIN	0.0773781
		ADRBK1	PRKCA	S319	NetworKIN	0.305493		ADRBK1	PRKCA	S319	NetworKIN	0.672694		ADRBK1	PRKCA	S319	NetworKIN	0.100497		ADRBK1	PRKCA	S319	NetworKIN	1.36503
		ADRBK1	CAMK2D	S333	NetworKIN	-0.560425		ADRBK1	CAMK2D	S333	NetworKIN	-0.211429		ADRBK1	CAMK2D	S333	NetworKIN	0.338293		ADRBK1	CAMK2D	S333	NetworKIN	-0.229111
		ADRBK1	IRS1	S337	NetworKIN	-0.0672215		ADRBK1	IRS1	S337	NetworKIN	-0.317853		ADRBK1	IRS1	S337	NetworKIN	-0.125926		ADRBK1	IRS1	S337	NetworKIN	-0.127212
		ADRBK1	PRKACA	S339	NetworKIN	-0.413614		ADRBK1	PRKACA	S339	NetworKIN	0.155225		ADRBK1	PRKACA	S339	NetworKIN	0.215381		ADRBK1	PRKACA	S339	NetworKIN	-0.0109695
		ADRBK1	IRS1	S341	NetworKIN	-0.0864353		ADRBK1	IRS1	S341	NetworKIN	-0.287902		ADRBK1	IRS1	S341	NetworKIN	0.111322		ADRBK1	IRS1	S341	NetworKIN	-0.0952166
		ADRBK1	TPPP	S35	NetworKIN	-0.365854		ADRBK1	TPPP	S35	NetworKIN	0.486777		ADRBK1	TPPP	S35	NetworKIN	0.110598		ADRBK1	TPPP	S35	NetworKIN	0.194025
		ADRBK1	CCR1	S352	NetworKIN	-0.361419		ADRBK1	CCR1	S352	NetworKIN	0.219652		ADRBK1	CCR1	S352	NetworKIN	0.27856		ADRBK1	CCR1	S352	NetworKIN	0.182122
		ADRBK1	PCYT1A	S362	NetworKIN	-0.0877105		ADRBK1	PCYT1A	S362	NetworKIN	-0.168145		ADRBK1	PCYT1A	S362	NetworKIN	0.107214		ADRBK1	PCYT1A	S362	NetworKIN	0.06689
		ADRBK1	GJA1	S364	NetworKIN	-0.396878		ADRBK1	GJA1	S364	NetworKIN	0.120775		ADRBK1	GJA1	S364	NetworKIN	-0.163518		ADRBK1	GJA1	S364	NetworKIN	-0.0740805
		ADRBK1	CAV1	S37	NetworKIN	-0.463054		ADRBK1	CAV1	S37	NetworKIN	0.146723		ADRBK1	CAV1	S37	NetworKIN	0.153348		ADRBK1	CAV1	S37	NetworKIN	-0.0553476
		ADRBK1	PTRF	S379	NetworKIN	-0.564183		ADRBK1	PTRF	S379	NetworKIN	0.428811		ADRBK1	PTRF	S379	NetworKIN	0.15545		ADRBK1	PTRF	S379	NetworKIN	0.198573
		ADRBK1	HDAC1	S393	NetworKIN	-0.535049		ADRBK1	HDAC1	S393	NetworKIN	0.0270764		ADRBK1	HDAC1	S393	NetworKIN	0.202641		ADRBK1	HDAC1	S393	NetworKIN	0.0174936
		ADRBK1	CAMK2B	S397	NetworKIN	-0.166574		ADRBK1	CAMK2B	S397	NetworKIN	0.268789		ADRBK1	CAMK2B	S397	NetworKIN	0.0803756		ADRBK1	CAMK2B	S397	NetworKIN	-0.739609
		ADRBK1	CRK	S41	NetworKIN	-0.969545		ADRBK1	CRK	S41	NetworKIN	-0.224398		ADRBK1	CRK	S41	NetworKIN	-0.0408678		ADRBK1	CRK	S41	NetworKIN	0.0296198
		ADRBK1	HDAC3	S424	NetworKIN	-0.416101		ADRBK1	HDAC3	S424	NetworKIN	0.254998		ADRBK1	HDAC3	S424	NetworKIN	0.174618		ADRBK1	HDAC3	S424	NetworKIN	0.0248345
		ADRBK1	PRPF31	S445	NetworKIN	-0.22321		ADRBK1	PRPF31	S445	NetworKIN	0.404261		ADRBK1	PRPF31	S445	NetworKIN	0.584552		ADRBK1	PRPF31	S445	NetworKIN	0.116631
		ADRBK1	TPM1	S45	NetworKIN	-0.239137		ADRBK1	TPM1	S45	NetworKIN	-0.122809		ADRBK1	TPM1	S45	NetworKIN	0.375461		ADRBK1	TPM1	S45	NetworKIN	0.0695807
		ADRBK1	PEBP1	S52	NetworKIN	-0.213757		ADRBK1	PEBP1	S52	NetworKIN	0.322299		ADRBK1	PEBP1	S52	NetworKIN	0.489625		ADRBK1	PEBP1	S52	NetworKIN	0.165104
		ADRBK1	IRS1	S527	NetworKIN	-0.352686		ADRBK1	IRS1	S527	NetworKIN	-0.281124		ADRBK1	IRS1	S527	NetworKIN	0.150522		ADRBK1	IRS1	S527	NetworKIN	0.123649
		ADRBK1	SLC9A1	S605	NetworKIN	0.0530052		ADRBK1	SLC9A1	S605	NetworKIN	-0.0569849		ADRBK1	SLC9A1	S605	NetworKIN	0.386313		ADRBK1	SLC9A1	S605	NetworKIN	0.126775
		ADRBK1	TPM1	S61	NetworKIN	-0.710878		ADRBK1	TPM1	S61	NetworKIN	0.0422036		ADRBK1	TPM1	S61	NetworKIN	0.404958		ADRBK1	TPM1	S61	NetworKIN	0.0370043
		ADRBK1	ARHGEF6	S640	NetworKIN	0.0708929		ADRBK1	ARHGEF6	S640	NetworKIN	0.76165		ADRBK1	ARHGEF6	S640	NetworKIN	0.268595		ADRBK1	ARHGEF6	S640	NetworKIN	0.0364919
		ADRBK1	PRKCD	S645	NetworKIN	-1.07038		ADRBK1	PRKCD	S645	NetworKIN	0.459041		ADRBK1	PRKCD	S645	NetworKIN	-0.229784		ADRBK1	PRKCD	S645	NetworKIN	0.165523
		ADRBK1	PRKCD	S664	NetworKIN	-1.16106		ADRBK1	PRKCD	S664	NetworKIN	0.575361		ADRBK1	PRKCD	S664	NetworKIN	-0.543803		ADRBK1	PRKCD	S664	NetworKIN	0.419736
		ADRBK1	ADRBK1	S670	NetworKIN	-0.205351		ADRBK1	ADRBK1	S670	NetworKIN	0.747069		ADRBK1	ADRBK1	S670	NetworKIN	0.216521		ADRBK1	ADRBK1	S670	NetworKIN	0.847164
		ADRBK1	VCL	S721	NetworKIN	-0.905743		ADRBK1	VCL	S721	NetworKIN	0.860026		ADRBK1	VCL	S721	NetworKIN	0.129287		ADRBK1	VCL	S721	NetworKIN	0.237827
		ADRBK1	PRKAR2A	S78	NetworKIN	-0.334124		ADRBK1	PRKAR2A	S78	NetworKIN	0.163518		ADRBK1	PRKAR2A	S78	NetworKIN	0.130566		ADRBK1	PRKAR2A	S78	NetworKIN	0.0710053
		ADRBK1	PRKAR2A	S80	NetworKIN	-0.182898		ADRBK1	PRKAR2A	S80	NetworKIN	0.127132		ADRBK1	PRKAR2A	S80	NetworKIN	0.0832369		ADRBK1	PRKAR2A	S80	NetworKIN	0.0238706
		ADRBK1	PXN	S83	NetworKIN	-0.276617		ADRBK1	PXN	S83	NetworKIN	0.425102		ADRBK1	PXN	S83	NetworKIN	0.176491		ADRBK1	PXN	S83	NetworKIN	0.0728466
		ADRBK1	PXN	S84	NetworKIN	-0.289844		ADRBK1	PXN	S84	NetworKIN	0.335265		ADRBK1	PXN	S84	NetworKIN	-0.155781		ADRBK1	PXN	S84	NetworKIN	0.0987701
		ADRBK1	PXN	S85	NetworKIN	-0.250337		ADRBK1	PXN	S85	NetworKIN	0.354932		ADRBK1	PXN	S85	NetworKIN	0.234233		ADRBK1	PXN	S85	NetworKIN	0.164829
		ADRBK1	TPM1	S87	NetworKIN	-2.22824		ADRBK1	TPM1	S87	NetworKIN	0.686265		ADRBK1	TPM1	S87	NetworKIN	-0.822472		ADRBK1	TPM1	S87	NetworKIN	0.475184
		ADRBK1	NCK1	S89	NetworKIN	0.241652		ADRBK1	NCK1	S89	NetworKIN	0.571778		ADRBK1	NCK1	S89	NetworKIN	0.109347		ADRBK1	NCK1	S89	NetworKIN	-0.00576668
		ADRBK1	NCK1	S91	NetworKIN	-0.191871		ADRBK1	NCK1	S91	NetworKIN	0.0540699		ADRBK1	NCK1	S91	NetworKIN	0.21753		ADRBK1	NCK1	S91	NetworKIN	0.492387
		ADRBK1	PRKAR2A	S99	NetworKIN	-0.0930411		ADRBK1	PRKAR2A	S99	NetworKIN	-0.0209813		ADRBK1	PRKAR2A	S99	NetworKIN	-0.0103187		ADRBK1	PRKAR2A	S99	NetworKIN	-0.0161239
		ADRBK1	PRKAR2A	T104	NetworKIN	-0.076431		ADRBK1	PRKAR2A	T104	NetworKIN	-0.196348		ADRBK1	PRKAR2A	T104	NetworKIN	0.0190854		ADRBK1	PRKAR2A	T104	NetworKIN	-0.0991012
		ADRBK1	NOS3	T1175	NetworKIN	-0.0383629		ADRBK1	NOS3	T1175	NetworKIN	0.379728		ADRBK1	NOS3	T1175	NetworKIN	0.37282		ADRBK1	NOS3	T1175	NetworKIN	0.342871
		ADRBK1	RICTOR	T1222	NetworKIN	0.168128		ADRBK1	RICTOR	T1222	NetworKIN	0.141872		ADRBK1	RICTOR	T1222	NetworKIN	0.579505		ADRBK1	RICTOR	T1222	NetworKIN	0.179528
		ADRBK1	PXN	T132	NetworKIN	0.274383		ADRBK1	PXN	T132	NetworKIN	0.0720247		ADRBK1	PXN	T132	NetworKIN	0.165727		ADRBK1	PXN	T132	NetworKIN	0.36934
		ADRBK1	MAPK1	T185	NetworKIN	0.577583		ADRBK1	MAPK1	T185	NetworKIN	0.291315		ADRBK1	MAPK1	T185	NetworKIN	0.0295839		ADRBK1	MAPK1	T185	NetworKIN	-0.341029
		ADRBK1	MAPK1	T190	NetworKIN	-0.183651		ADRBK1	MAPK1	T190	NetworKIN	0.217473		ADRBK1	MAPK1	T190	NetworKIN	0.0605159		ADRBK1	MAPK1	T190	NetworKIN	0.123523
		ADRBK1	TPM3	T253	NetworKIN	-0.00567383		ADRBK1	TPM3	T253	NetworKIN	0.305148		ADRBK1	TPM3	T253	NetworKIN	0.210938		ADRBK1	TPM3	T253	NetworKIN	0.0625842
		ADRBK1	CAMK2B	T254	NetworKIN	-0.879206		ADRBK1	CAMK2B	T254	NetworKIN	-0.074599		ADRBK1	CAMK2B	T254	NetworKIN	0.366121		ADRBK1	CAMK2B	T254	NetworKIN	-0.319747
		ADRBK1	TPM1	T282	NetworKIN	-0.00810859		ADRBK1	TPM1	T282	NetworKIN	0.216526		ADRBK1	TPM1	T282	NetworKIN	0.127813		ADRBK1	TPM1	T282	NetworKIN	0.0543856
		ADRBK1	CAMK2D	T306	NetworKIN	0.215898		ADRBK1	CAMK2D	T306	NetworKIN	0.210011		ADRBK1	CAMK2D	T306	NetworKIN	0.0687733		ADRBK1	CAMK2D	T306	NetworKIN	0.0784329
		ADRBK1	CAMK2D	T307	NetworKIN	-0.0448173		ADRBK1	CAMK2D	T307	NetworKIN	0.330909		ADRBK1	CAMK2D	T307	NetworKIN	0.179988		ADRBK1	CAMK2D	T307	NetworKIN	0.13051
		ADRBK1	CAMK2D	T336	NetworKIN	-0.362752		ADRBK1	CAMK2D	T336	NetworKIN	0.179348		ADRBK1	CAMK2D	T336	NetworKIN	0.253256		ADRBK1	CAMK2D	T336	NetworKIN	-0.241091
		ADRBK1	CAMK2B	T366	NetworKIN	0.572024		ADRBK1	CAMK2B	T366	NetworKIN	0.641335		ADRBK1	CAMK2B	T366	NetworKIN	0.251736		ADRBK1	CAMK2B	T366	NetworKIN	2.11882
		ADRBK1	CAMK2B	T371	NetworKIN	-0.261706		ADRBK1	CAMK2B	T371	NetworKIN	0.101328		ADRBK1	CAMK2B	T371	NetworKIN	0.179021		ADRBK1	CAMK2B	T371	NetworKIN	-0.100347
		ADRBK1	PTRF	T376	NetworKIN	-0.497867		ADRBK1	PTRF	T376	NetworKIN	0.297398		ADRBK1	PTRF	T376	NetworKIN	0.427882		ADRBK1	PTRF	T376	NetworKIN	-0.0533161
		ADRBK1	CAMK2B	T381	NetworKIN	-0.143447		ADRBK1	CAMK2B	T381	NetworKIN	0.419645		ADRBK1	CAMK2B	T381	NetworKIN	0.484393		ADRBK1	CAMK2B	T381	NetworKIN	0.188785
		ADRBK1	CAMK2B	T382	NetworKIN	-0.0504069		ADRBK1	CAMK2B	T382	NetworKIN	0.155978		ADRBK1	CAMK2B	T382	NetworKIN	0.205695		ADRBK1	CAMK2B	T382	NetworKIN	-0.0566949
		ADRBK1	CAMK2B	T400	NetworKIN	-0.237087		ADRBK1	CAMK2B	T400	NetworKIN	0.230772		ADRBK1	CAMK2B	T400	NetworKIN	0.397914		ADRBK1	CAMK2B	T400	NetworKIN	-0.176592
		ADRBK1	IRS1	T530	NetworKIN	-0.60952		ADRBK1	IRS1	T530	NetworKIN	-0.248466		ADRBK1	IRS1	T530	NetworKIN	0.346346		ADRBK1	IRS1	T530	NetworKIN	0.0823952
		ADRBK1	DAG1	T790	NetworKIN	-0.32009		ADRBK1	DAG1	T790	NetworKIN	0.299652		ADRBK1	DAG1	T790	NetworKIN	0.20142		ADRBK1	DAG1	T790	NetworKIN	-0.120034
		ADRBK2	ADRB2	S246	NetworKIN	0.0153979		ADRBK2	ADRB2	S246	NetworKIN	0.273078		ADRBK2	ADRB2	S246	NetworKIN	0.382648		ADRBK2	ADRB2	S246	NetworKIN	0.148041
		ADRBK2	CCR1	S352	NetworKIN	-0.361419		ADRBK2	CCR1	S352	NetworKIN	0.219652		ADRBK2	CCR1	S352	NetworKIN	0.27856		ADRBK2	CCR1	S352	NetworKIN	0.182122
		ADRBK2	PRKAR2A	S78	NetworKIN	-0.334124		ADRBK2	PRKAR2A	S78	NetworKIN	0.163518		ADRBK2	PRKAR2A	S78	NetworKIN	0.130566		ADRBK2	PRKAR2A	S78	NetworKIN	0.0710053
		ADRBK2	PRKAR2A	S80	NetworKIN	-0.182898		ADRBK2	PRKAR2A	S80	NetworKIN	0.127132		ADRBK2	PRKAR2A	S80	NetworKIN	0.0832369		ADRBK2	PRKAR2A	S80	NetworKIN	0.0238706
		ADRBK2	PRKAR2A	S99	NetworKIN	-0.0930411		ADRBK2	PRKAR2A	S99	NetworKIN	-0.0209813		ADRBK2	PRKAR2A	S99	NetworKIN	-0.0103187		ADRBK2	PRKAR2A	S99	NetworKIN	-0.0161239
		ADRBK2	PRKAR2A	T104	NetworKIN	-0.076431		ADRBK2	PRKAR2A	T104	NetworKIN	-0.196348		ADRBK2	PRKAR2A	T104	NetworKIN	0.0190854		ADRBK2	PRKAR2A	T104	NetworKIN	-0.0991012
		AKT1	IRS1	S1100	NetworKIN	0.124628		AKT1	IRS1	S1100	NetworKIN	0.142147		AKT1	IRS1	S1100	NetworKIN	-0.489783		AKT1	IRS1	S1100	NetworKIN	-0.178021
		AKT1	IRS1	S1101	NetworKIN	-0.436822		AKT1	IRS1	S1101	NetworKIN	-0.460267		AKT1	IRS1	S1101	NetworKIN	0.223994		AKT1	IRS1	S1101	NetworKIN	0.132442
		AKT1	NOS3	S1179	NetworKIN	0.0407712		AKT1	NOS3	S1179	NetworKIN	-0.127781		AKT1	NOS3	S1179	NetworKIN	-0.00861523		AKT1	NOS3	S1179	NetworKIN	-0.227752
		AKT1	MTOR	S1261	NetworKIN	0.846938		AKT1	MTOR	S1261	NetworKIN	0.611645		AKT1	MTOR	S1261	NetworKIN	0.184585		AKT1	MTOR	S1261	NetworKIN	-0.263957
		AKT1	INPPL1	S132	NetworKIN	-0.346892		AKT1	INPPL1	S132	NetworKIN	0.139435		AKT1	INPPL1	S132	NetworKIN	0.327169		AKT1	INPPL1	S132	NetworKIN	-0.0381828
		AKT1	TNS1	S1400	NetworKIN	-0.610619		AKT1	TNS1	S1400	NetworKIN	0.366748		AKT1	TNS1	S1400	NetworKIN	-0.0882265		AKT1	TNS1	S1400	NetworKIN	0.408224
		AKT1	CLIP1	S147	NetworKIN	-0.0369325		AKT1	CLIP1	S147	NetworKIN	-0.292005		AKT1	CLIP1	S147	NetworKIN	0.521495		AKT1	CLIP1	S147	NetworKIN	0.0356213
		AKT1	HSPB1	S15	NetworKIN	1.34119		AKT1	HSPB1	S15	NetworKIN	1.87711		AKT1	HSPB1	S15	NetworKIN	-0.573784		AKT1	HSPB1	S15	NetworKIN	1.55372
		AKT1	IQGAP2	S16	NetworKIN	-0.321261		AKT1	IQGAP2	S16	NetworKIN	0.432463		AKT1	IQGAP2	S16	NetworKIN	0.447431		AKT1	IQGAP2	S16	NetworKIN	0.15399
		AKT1	WNK1	S167	NetworKIN	-0.472643		AKT1	WNK1	S167	NetworKIN	0.0166875		AKT1	WNK1	S167	NetworKIN	0.209389		AKT1	WNK1	S167	NetworKIN	0.409463
		AKT1	SRC	S17	NetworKIN	-0.963667		AKT1	SRC	S17	NetworKIN	0.12108		AKT1	SRC	S17	NetworKIN	-0.415743		AKT1	SRC	S17	NetworKIN	-0.00328094
		AKT1	ABI1	S222	NetworKIN	-0.469195		AKT1	ABI1	S222	NetworKIN	0.27634		AKT1	ABI1	S222	NetworKIN	-0.179344		AKT1	ABI1	S222	NetworKIN	0.109508
		AKT1	HSP90AB1	S226	NetworKIN	-0.488558		AKT1	HSP90AB1	S226	NetworKIN	0.235037		AKT1	HSP90AB1	S226	NetworKIN	0.311117		AKT1	HSP90AB1	S226	NetworKIN	0.0091175
		AKT1	ABI1	S231	NetworKIN	-0.783871		AKT1	ABI1	S231	NetworKIN	0.16816		AKT1	ABI1	S231	NetworKIN	-0.385477		AKT1	ABI1	S231	NetworKIN	0.0553834
		AKT1	MTOR	S2481	NetworKIN	-0.168194		AKT1	MTOR	S2481	NetworKIN	0.40866		AKT1	MTOR	S2481	NetworKIN	0.62331		AKT1	MTOR	S2481	NetworKIN	0.16587
		AKT1	PPP1R3D	S25	NetworKIN	-0.0500735		AKT1	PPP1R3D	S25	NetworKIN	0.327999		AKT1	PPP1R3D	S25	NetworKIN	0.155957		AKT1	PPP1R3D	S25	NetworKIN	0.0760808
		AKT1	RAF1	S259	NetworKIN	-0.209507		AKT1	RAF1	S259	NetworKIN	0.134276		AKT1	RAF1	S259	NetworKIN	0.0495004		AKT1	RAF1	S259	NetworKIN	0.0638142
		AKT1	CTNND1	S269	NetworKIN	-0.619402		AKT1	CTNND1	S269	NetworKIN	-0.282514		AKT1	CTNND1	S269	NetworKIN	0.272228		AKT1	CTNND1	S269	NetworKIN	0.077411
		AKT1	SIRT1	S27	NetworKIN	-0.628387		AKT1	SIRT1	S27	NetworKIN	-0.0211236		AKT1	SIRT1	S27	NetworKIN	-0.0238376		AKT1	SIRT1	S27	NetworKIN	0.168533
		AKT1	IRS1	S270	NetworKIN	-0.202046		AKT1	IRS1	S270	NetworKIN	-0.191829		AKT1	IRS1	S270	NetworKIN	-0.130835		AKT1	IRS1	S270	NetworKIN	0.060301
		AKT1	VCL	S288	NetworKIN	-0.504292		AKT1	VCL	S288	NetworKIN	0.777274		AKT1	VCL	S288	NetworKIN	0.15941		AKT1	VCL	S288	NetworKIN	0.550138
		AKT1	VCL	S290	NetworKIN	-0.435359		AKT1	VCL	S290	NetworKIN	0.323061		AKT1	VCL	S290	NetworKIN	0.163129		AKT1	VCL	S290	NetworKIN	0.175895
		AKT1	IRS1	S3	NetworKIN	-0.20939		AKT1	IRS1	S3	NetworKIN	-0.130666		AKT1	IRS1	S3	NetworKIN	-0.0778996		AKT1	IRS1	S3	NetworKIN	0.0320856
		AKT1	CARHSP1	S30	NetworKIN	-0.0499919		AKT1	CARHSP1	S30	NetworKIN	0.360125		AKT1	CARHSP1	S30	NetworKIN	-0.0206541		AKT1	CARHSP1	S30	NetworKIN	0.154167
		AKT1	SMARCC2	S302	NetworKIN	-0.330767		AKT1	SMARCC2	S302	NetworKIN	0.145453		AKT1	SMARCC2	S302	NetworKIN	0.249347		AKT1	SMARCC2	S302	NetworKIN	0.0365512
		AKT1	SMARCC2	S304	NetworKIN	-0.287456		AKT1	SMARCC2	S304	NetworKIN	0.039453		AKT1	SMARCC2	S304	NetworKIN	0.101936		AKT1	SMARCC2	S304	NetworKIN	-0.0934361
		AKT1	IRS2	S306	NetworKIN	-0.540501		AKT1	IRS2	S306	NetworKIN	-0.024748		AKT1	IRS2	S306	NetworKIN	0.333409		AKT1	IRS2	S306	NetworKIN	0.212404
		AKT1	IRS1	S307	NetworKIN	-0.0764391		AKT1	IRS1	S307	NetworKIN	0.104714		AKT1	IRS1	S307	NetworKIN	0.315593		AKT1	IRS1	S307	NetworKIN	0.0779247
		AKT1	CARHSP1	S32	NetworKIN	0.0609504		AKT1	CARHSP1	S32	NetworKIN	0.30682		AKT1	CARHSP1	S32	NetworKIN	0.101456		AKT1	CARHSP1	S32	NetworKIN	0.225644
		AKT1	SMARCC1	S328	NetworKIN	-0.0714152		AKT1	SMARCC1	S328	NetworKIN	-0.109884		AKT1	SMARCC1	S328	NetworKIN	0.0516016		AKT1	SMARCC1	S328	NetworKIN	-0.371145
		AKT1	IRS1	S330	NetworKIN	-0.0270253		AKT1	IRS1	S330	NetworKIN	0.221561		AKT1	IRS1	S330	NetworKIN	-0.141524		AKT1	IRS1	S330	NetworKIN	0.330103
		AKT1	SMARCC1	S330	NetworKIN	-0.0767636		AKT1	SMARCC1	S330	NetworKIN	-0.0953771		AKT1	SMARCC1	S330	NetworKIN	0.112454		AKT1	SMARCC1	S330	NetworKIN	-0.353169
		AKT1	TNS1	S338	NetworKIN	-0.436889		AKT1	TNS1	S338	NetworKIN	0.224662		AKT1	TNS1	S338	NetworKIN	0.101515		AKT1	TNS1	S338	NetworKIN	-0.0245911
		AKT1	ARHGDIA	S34	NetworKIN	-0.229601		AKT1	ARHGDIA	S34	NetworKIN	0.997827		AKT1	ARHGDIA	S34	NetworKIN	0.0886555		AKT1	ARHGDIA	S34	NetworKIN	-0.157747
		AKT1	IRS1	S341	NetworKIN	-0.0864353		AKT1	IRS1	S341	NetworKIN	-0.287902		AKT1	IRS1	S341	NetworKIN	0.111322		AKT1	IRS1	S341	NetworKIN	-0.0952166
		AKT1	TBC1D4	S341	NetworKIN	-0.776788		AKT1	TBC1D4	S341	NetworKIN	-0.635231		AKT1	TBC1D4	S341	NetworKIN	0.618757		AKT1	TBC1D4	S341	NetworKIN	0.357357
		AKT1	VCL	S346	NetworKIN	-0.514843		AKT1	VCL	S346	NetworKIN	0.448954		AKT1	VCL	S346	NetworKIN	0.115108		AKT1	VCL	S346	NetworKIN	0.349025
		AKT1	CLIP1	S348	NetworKIN	0.00813111		AKT1	CLIP1	S348	NetworKIN	0.605414		AKT1	CLIP1	S348	NetworKIN	0.683204		AKT1	CLIP1	S348	NetworKIN	-0.372141
		AKT1	CTNND1	S349	NetworKIN	-0.27484		AKT1	CTNND1	S349	NetworKIN	0.0381353		AKT1	CTNND1	S349	NetworKIN	0.105504		AKT1	CTNND1	S349	NetworKIN	0.0298407
		AKT1	ARHGEF12	S41	NetworKIN	-0.140217		AKT1	ARHGEF12	S41	NetworKIN	1.00542		AKT1	ARHGEF12	S41	NetworKIN	1.03224		AKT1	ARHGEF12	S41	NetworKIN	0.0462674
		AKT1	CRK	S41	NetworKIN	-0.969545		AKT1	CRK	S41	NetworKIN	-0.224398		AKT1	CRK	S41	NetworKIN	-0.0408678		AKT1	CRK	S41	NetworKIN	0.0296198
		AKT1	HTT	S417	NetworKIN	-0.278153		AKT1	HTT	S417	NetworKIN	-0.0363678		AKT1	HTT	S417	NetworKIN	0.661751		AKT1	HTT	S417	NetworKIN	0.175984
		AKT1	PPP1R3A	S46	NetworKIN	-0.158085		AKT1	PPP1R3A	S46	NetworKIN	0.0849297		AKT1	PPP1R3A	S46	NetworKIN	0.13213		AKT1	PPP1R3A	S46	NetworKIN	0.125561
		AKT1	PPP1R3A	S48	NetworKIN	-0.293158		AKT1	PPP1R3A	S48	NetworKIN	-0.105707		AKT1	PPP1R3A	S48	NetworKIN	0.111095		AKT1	PPP1R3A	S48	NetworKIN	-0.000904266
		AKT1	SLC2A4	S488	NetworKIN	-0.216969		AKT1	SLC2A4	S488	NetworKIN	0.252813		AKT1	SLC2A4	S488	NetworKIN	0.114474		AKT1	SLC2A4	S488	NetworKIN	0.033741
		AKT1	TBC1D1	S507	NetworKIN	-0.529961		AKT1	TBC1D1	S507	NetworKIN	-0.444726		AKT1	TBC1D1	S507	NetworKIN	0.206646		AKT1	TBC1D1	S507	NetworKIN	-0.204508
		AKT1	IRS1	S527	NetworKIN	-0.352686		AKT1	IRS1	S527	NetworKIN	-0.281124		AKT1	IRS1	S527	NetworKIN	0.150522		AKT1	IRS1	S527	NetworKIN	0.123649
		AKT1	PSMA5	S56	NetworKIN	-0.278007		AKT1	PSMA5	S56	NetworKIN	0.164546		AKT1	PSMA5	S56	NetworKIN	0.226747		AKT1	PSMA5	S56	NetworKIN	0.505129
		AKT1	IRS2	S560	NetworKIN	-0.170712		AKT1	IRS2	S560	NetworKIN	0.162723		AKT1	IRS2	S560	NetworKIN	0.0504492		AKT1	IRS2	S560	NetworKIN	0.277245
		AKT1	TBC1D4	S570	NetworKIN	-0.262862		AKT1	TBC1D4	S570	NetworKIN	-0.126642		AKT1	TBC1D4	S570	NetworKIN	0.154913		AKT1	TBC1D4	S570	NetworKIN	0.259523
		AKT1	SLC9A1	S605	NetworKIN	0.0530052		AKT1	SLC9A1	S605	NetworKIN	-0.0569849		AKT1	SLC9A1	S605	NetworKIN	0.386313		AKT1	SLC9A1	S605	NetworKIN	0.126775
		AKT1	TNS1	S621	NetworKIN	-0.102972		AKT1	TNS1	S621	NetworKIN	0.402856		AKT1	TNS1	S621	NetworKIN	0.146157		AKT1	TNS1	S621	NetworKIN	0.142345
		AKT1	TBC1D4	S673	NetworKIN	0.413375		AKT1	TBC1D4	S673	NetworKIN	-0.0185669		AKT1	TBC1D4	S673	NetworKIN	-0.0576211		AKT1	TBC1D4	S673	NetworKIN	-0.0986661
		AKT1	TNS1	S701	NetworKIN	-0.129597		AKT1	TNS1	S701	NetworKIN	0.310395		AKT1	TNS1	S701	NetworKIN	0.195686		AKT1	TNS1	S701	NetworKIN	0.147504
		AKT1	BRAF	S729	NetworKIN	-0.157515		AKT1	BRAF	S729	NetworKIN	-0.0881678		AKT1	BRAF	S729	NetworKIN	-0.0611345		AKT1	BRAF	S729	NetworKIN	-0.334362
		AKT1	PPP1R3D	S74	NetworKIN	-0.197319		AKT1	PPP1R3D	S74	NetworKIN	-0.068637		AKT1	PPP1R3D	S74	NetworKIN	-0.104662		AKT1	PPP1R3D	S74	NetworKIN	-0.228887
		AKT1	BAD	S75	NetworKIN	-0.425042		AKT1	BAD	S75	NetworKIN	0.0516968		AKT1	BAD	S75	NetworKIN	0.16052		AKT1	BAD	S75	NetworKIN	0.130798
		AKT1	TBC1D4	S751	NetworKIN	0.0114425		AKT1	TBC1D4	S751	NetworKIN	-0.157216		AKT1	TBC1D4	S751	NetworKIN	0.344072		AKT1	TBC1D4	S751	NetworKIN	0.0455869
		AKT1	PPP1R3D	S78	NetworKIN	-0.212123		AKT1	PPP1R3D	S78	NetworKIN	-0.0847178		AKT1	PPP1R3D	S78	NetworKIN	-0.101799		AKT1	PPP1R3D	S78	NetworKIN	-0.236894
		AKT1	TNS1	S794	NetworKIN	-0.831448		AKT1	TNS1	S794	NetworKIN	0.280398		AKT1	TNS1	S794	NetworKIN	0.35947		AKT1	TNS1	S794	NetworKIN	0.214737
		AKT1	NCK1	S85	NetworKIN	0.147193		AKT1	NCK1	S85	NetworKIN	0.570691		AKT1	NCK1	S85	NetworKIN	0.231727		AKT1	NCK1	S85	NetworKIN	0.00109545
		AKT1	TNS1	S899	NetworKIN	0.261606		AKT1	TNS1	S899	NetworKIN	0.240631		AKT1	TNS1	S899	NetworKIN	0.205066		AKT1	TNS1	S899	NetworKIN	0.104694
		AKT1	CTNND1	S920	NetworKIN	-1.01323		AKT1	CTNND1	S920	NetworKIN	-0.244811		AKT1	CTNND1	S920	NetworKIN	0.757792		AKT1	CTNND1	S920	NetworKIN	0.148452
		AKT1	ARHGAP29	S949	NetworKIN	-0.135891		AKT1	ARHGAP29	S949	NetworKIN	0.20842		AKT1	ARHGAP29	S949	NetworKIN	0.155722		AKT1	ARHGAP29	S949	NetworKIN	0.107883
		AKT1	NOS3	T1175	NetworKIN	-0.0383629		AKT1	NOS3	T1175	NetworKIN	0.379728		AKT1	NOS3	T1175	NetworKIN	0.37282		AKT1	NOS3	T1175	NetworKIN	0.342871
		AKT1	TNS1	T1406	NetworKIN	-0.864196		AKT1	TNS1	T1406	NetworKIN	0.271921		AKT1	TNS1	T1406	NetworKIN	0.129707		AKT1	TNS1	T1406	NetworKIN	0.502688
		AKT1	CYBA	T147	NetworKIN	-0.432519		AKT1	CYBA	T147	NetworKIN	0.359092		AKT1	CYBA	T147	NetworKIN	0.347421		AKT1	CYBA	T147	NetworKIN	0.0361157
		AKT1	CLIP1	T350	NetworKIN	0.287849		AKT1	CLIP1	T350	NetworKIN	0.732263		AKT1	CLIP1	T350	NetworKIN	0.049306		AKT1	CLIP1	T350	NetworKIN	-0.358921
		AKT1	IRS1	T446	NetworKIN	-0.259285		AKT1	IRS1	T446	NetworKIN	-0.069643		AKT1	IRS1	T446	NetworKIN	-0.0732817		AKT1	IRS1	T446	NetworKIN	-0.00385424
		AKT1	TBC1D1	T505	NetworKIN	-0.475075		AKT1	TBC1D1	T505	NetworKIN	-0.260992		AKT1	TBC1D1	T505	NetworKIN	-0.0627883		AKT1	TBC1D1	T505	NetworKIN	0.0927957
		AKT1	TBC1D4	T568	NetworKIN	-0.774701		AKT1	TBC1D4	T568	NetworKIN	-0.275171		AKT1	TBC1D4	T568	NetworKIN	-0.128521		AKT1	TBC1D4	T568	NetworKIN	-0.124287
		AKT2	CDKN1B	S10	NetworKIN	-0.528298		AKT2	CDKN1B	S10	NetworKIN	-0.157325		AKT2	CDKN1B	S10	NetworKIN	-0.0046816		AKT2	CDKN1B	S10	NetworKIN	-0.180952
		AKT2	IRS1	S1100	NetworKIN	0.124628		AKT2	IRS1	S1100	NetworKIN	0.142147		AKT2	IRS1	S1100	NetworKIN	-0.489783		AKT2	IRS1	S1100	NetworKIN	-0.178021
		AKT2	IRS1	S1101	NetworKIN	-0.436822		AKT2	IRS1	S1101	NetworKIN	-0.460267		AKT2	IRS1	S1101	NetworKIN	0.223994		AKT2	IRS1	S1101	NetworKIN	0.132442
		AKT2	NOS3	S1177	NetworKIN	-0.0131306		AKT2	NOS3	S1177	NetworKIN	0.327432		AKT2	NOS3	S1177	NetworKIN	0.293683		AKT2	NOS3	S1177	NetworKIN	0.281374
		AKT2	NOS3	S1179	NetworKIN	0.0407712		AKT2	NOS3	S1179	NetworKIN	-0.127781		AKT2	NOS3	S1179	NetworKIN	-0.00861523		AKT2	NOS3	S1179	NetworKIN	-0.227752
		AKT2	INPPL1	S132	NetworKIN	-0.346892		AKT2	INPPL1	S132	NetworKIN	0.139435		AKT2	INPPL1	S132	NetworKIN	0.327169		AKT2	INPPL1	S132	NetworKIN	-0.0381828
		AKT2	GSK3A	S21	NetworKIN	-0.549143		AKT2	GSK3A	S21	NetworKIN	-0.0638136		AKT2	GSK3A	S21	NetworKIN	0.423193		AKT2	GSK3A	S21	NetworKIN	0.0381005
		AKT2	PPP1R3D	S25	NetworKIN	-0.0500735		AKT2	PPP1R3D	S25	NetworKIN	0.327999		AKT2	PPP1R3D	S25	NetworKIN	0.155957		AKT2	PPP1R3D	S25	NetworKIN	0.0760808
		AKT2	FOXO3	S253	NetworKIN	-0.0652574		AKT2	FOXO3	S253	NetworKIN	-0.250179		AKT2	FOXO3	S253	NetworKIN	0.573233		AKT2	FOXO3	S253	NetworKIN	0.244162
		AKT2	FOXO1	S256	NetworKIN	-0.417025		AKT2	FOXO1	S256	NetworKIN	-0.161306		AKT2	FOXO1	S256	NetworKIN	0.339167		AKT2	FOXO1	S256	NetworKIN	0.175884
		AKT2	IRS1	S270	NetworKIN	-0.202046		AKT2	IRS1	S270	NetworKIN	-0.191829		AKT2	IRS1	S270	NetworKIN	-0.130835		AKT2	IRS1	S270	NetworKIN	0.060301
		AKT2	IRS2	S306	NetworKIN	-0.540501		AKT2	IRS2	S306	NetworKIN	-0.024748		AKT2	IRS2	S306	NetworKIN	0.333409		AKT2	IRS2	S306	NetworKIN	0.212404
		AKT2	IRS1	S307	NetworKIN	-0.0764391		AKT2	IRS1	S307	NetworKIN	0.104714		AKT2	IRS1	S307	NetworKIN	0.315593		AKT2	IRS1	S307	NetworKIN	0.0779247
		AKT2	IRS1	S330	NetworKIN	-0.0270253		AKT2	IRS1	S330	NetworKIN	0.221561		AKT2	IRS1	S330	NetworKIN	-0.141524		AKT2	IRS1	S330	NetworKIN	0.330103
		AKT2	IRS1	S341	NetworKIN	-0.0864353		AKT2	IRS1	S341	NetworKIN	-0.287902		AKT2	IRS1	S341	NetworKIN	0.111322		AKT2	IRS1	S341	NetworKIN	-0.0952166
		AKT2	TBC1D4	S341	NetworKIN	-0.776788		AKT2	TBC1D4	S341	NetworKIN	-0.635231		AKT2	TBC1D4	S341	NetworKIN	0.618757		AKT2	TBC1D4	S341	NetworKIN	0.357357
		AKT2	PPP1R3A	S46	NetworKIN	-0.158085		AKT2	PPP1R3A	S46	NetworKIN	0.0849297		AKT2	PPP1R3A	S46	NetworKIN	0.13213		AKT2	PPP1R3A	S46	NetworKIN	0.125561
		AKT2	AKT2	S474	NetworKIN	-0.218463		AKT2	AKT2	S474	NetworKIN	-0.0712267		AKT2	AKT2	S474	NetworKIN	0.148073		AKT2	AKT2	S474	NetworKIN	0.0791953
		AKT2	PPP1R3A	S48	NetworKIN	-0.293158		AKT2	PPP1R3A	S48	NetworKIN	-0.105707		AKT2	PPP1R3A	S48	NetworKIN	0.111095		AKT2	PPP1R3A	S48	NetworKIN	-0.000904266
		AKT2	SLC2A4	S488	NetworKIN	-0.216969		AKT2	SLC2A4	S488	NetworKIN	0.252813		AKT2	SLC2A4	S488	NetworKIN	0.114474		AKT2	SLC2A4	S488	NetworKIN	0.033741
		AKT2	IRS1	S527	NetworKIN	-0.352686		AKT2	IRS1	S527	NetworKIN	-0.281124		AKT2	IRS1	S527	NetworKIN	0.150522		AKT2	IRS1	S527	NetworKIN	0.123649
		AKT2	IRS2	S560	NetworKIN	-0.170712		AKT2	IRS2	S560	NetworKIN	0.162723		AKT2	IRS2	S560	NetworKIN	0.0504492		AKT2	IRS2	S560	NetworKIN	0.277245
		AKT2	TBC1D4	S570	NetworKIN	-0.262862		AKT2	TBC1D4	S570	NetworKIN	-0.126642		AKT2	TBC1D4	S570	NetworKIN	0.154913		AKT2	TBC1D4	S570	NetworKIN	0.259523
		AKT2	TBC1D4	S588	NetworKIN	0.0462341		AKT2	TBC1D4	S588	NetworKIN	0.245317		AKT2	TBC1D4	S588	NetworKIN	0.16768		AKT2	TBC1D4	S588	NetworKIN	0.0320536
		AKT2	TBC1D4	S673	NetworKIN	0.413375		AKT2	TBC1D4	S673	NetworKIN	-0.0185669		AKT2	TBC1D4	S673	NetworKIN	-0.0576211		AKT2	TBC1D4	S673	NetworKIN	-0.0986661
		AKT2	PPP1R3D	S74	NetworKIN	-0.197319		AKT2	PPP1R3D	S74	NetworKIN	-0.068637		AKT2	PPP1R3D	S74	NetworKIN	-0.104662		AKT2	PPP1R3D	S74	NetworKIN	-0.228887
		AKT2	BAD	S75	NetworKIN	-0.425042		AKT2	BAD	S75	NetworKIN	0.0516968		AKT2	BAD	S75	NetworKIN	0.16052		AKT2	BAD	S75	NetworKIN	0.130798
		AKT2	TBC1D4	S751	NetworKIN	0.0114425		AKT2	TBC1D4	S751	NetworKIN	-0.157216		AKT2	TBC1D4	S751	NetworKIN	0.344072		AKT2	TBC1D4	S751	NetworKIN	0.0455869
		AKT2	PPP1R3D	S78	NetworKIN	-0.212123		AKT2	PPP1R3D	S78	NetworKIN	-0.0847178		AKT2	PPP1R3D	S78	NetworKIN	-0.101799		AKT2	PPP1R3D	S78	NetworKIN	-0.236894
		AKT2	MAP2K4	S80	NetworKIN	0.0993864		AKT2	MAP2K4	S80	NetworKIN	1.3882		AKT2	MAP2K4	S80	NetworKIN	0.226514		AKT2	MAP2K4	S80	NetworKIN	0.180813
		AKT2	TSC2	S939	NetworKIN	-0.179627		AKT2	TSC2	S939	NetworKIN	-0.197138		AKT2	TSC2	S939	NetworKIN	-0.00135892		AKT2	TSC2	S939	NetworKIN	-0.0365394
		AKT2	NOS3	T1175	NetworKIN	-0.0383629		AKT2	NOS3	T1175	NetworKIN	0.379728		AKT2	NOS3	T1175	NetworKIN	0.37282		AKT2	NOS3	T1175	NetworKIN	0.342871
		AKT2	TSC2	T1462	NetworKIN	0.0392118		AKT2	TSC2	T1462	NetworKIN	0.223093		AKT2	TSC2	T1462	NetworKIN	0.100408		AKT2	TSC2	T1462	NetworKIN	-0.0246047
		AKT2	IRS1	T446	NetworKIN	-0.259285		AKT2	IRS1	T446	NetworKIN	-0.069643		AKT2	IRS1	T446	NetworKIN	-0.0732817		AKT2	IRS1	T446	NetworKIN	-0.00385424
		AKT2	TBC1D4	T568	NetworKIN	-0.774701		AKT2	TBC1D4	T568	NetworKIN	-0.275171		AKT2	TBC1D4	T568	NetworKIN	-0.128521		AKT2	TBC1D4	T568	NetworKIN	-0.124287
		AKT2	TBC1D4	T642	NetworKIN	-0.0579316		AKT2	TBC1D4	T642	NetworKIN	-0.353735		AKT2	TBC1D4	T642	NetworKIN	0.149074		AKT2	TBC1D4	T642	NetworKIN	0.313352
		AKT3	CDKN1B	S10	NetworKIN	-0.528298		AKT3	CDKN1B	S10	NetworKIN	-0.157325		AKT3	CDKN1B	S10	NetworKIN	-0.0046816		AKT3	CDKN1B	S10	NetworKIN	-0.180952
		AKT3	NOS3	S1177	NetworKIN	-0.0131306		AKT3	NOS3	S1177	NetworKIN	0.327432		AKT3	NOS3	S1177	NetworKIN	0.293683		AKT3	NOS3	S1177	NetworKIN	0.281374
		AKT3	NOS3	S1179	NetworKIN	0.0407712		AKT3	NOS3	S1179	NetworKIN	-0.127781		AKT3	NOS3	S1179	NetworKIN	-0.00861523		AKT3	NOS3	S1179	NetworKIN	-0.227752
		AKT3	GSK3A	S21	NetworKIN	-0.549143		AKT3	GSK3A	S21	NetworKIN	-0.0638136		AKT3	GSK3A	S21	NetworKIN	0.423193		AKT3	GSK3A	S21	NetworKIN	0.0381005
		AKT3	PPP1R3D	S25	NetworKIN	-0.0500735		AKT3	PPP1R3D	S25	NetworKIN	0.327999		AKT3	PPP1R3D	S25	NetworKIN	0.155957		AKT3	PPP1R3D	S25	NetworKIN	0.0760808
		AKT3	FOXO3	S253	NetworKIN	-0.0652574		AKT3	FOXO3	S253	NetworKIN	-0.250179		AKT3	FOXO3	S253	NetworKIN	0.573233		AKT3	FOXO3	S253	NetworKIN	0.244162
		AKT3	FOXO1	S256	NetworKIN	-0.417025		AKT3	FOXO1	S256	NetworKIN	-0.161306		AKT3	FOXO1	S256	NetworKIN	0.339167		AKT3	FOXO1	S256	NetworKIN	0.175884
		AKT3	IRS2	S306	NetworKIN	-0.540501		AKT3	IRS2	S306	NetworKIN	-0.024748		AKT3	IRS2	S306	NetworKIN	0.333409		AKT3	IRS2	S306	NetworKIN	0.212404
		AKT3	PPP1R3A	S46	NetworKIN	-0.158085		AKT3	PPP1R3A	S46	NetworKIN	0.0849297		AKT3	PPP1R3A	S46	NetworKIN	0.13213		AKT3	PPP1R3A	S46	NetworKIN	0.125561
		AKT3	PPP1R3A	S48	NetworKIN	-0.293158		AKT3	PPP1R3A	S48	NetworKIN	-0.105707		AKT3	PPP1R3A	S48	NetworKIN	0.111095		AKT3	PPP1R3A	S48	NetworKIN	-0.000904266
		AKT3	SLC2A4	S488	NetworKIN	-0.216969		AKT3	SLC2A4	S488	NetworKIN	0.252813		AKT3	SLC2A4	S488	NetworKIN	0.114474		AKT3	SLC2A4	S488	NetworKIN	0.033741
		AKT3	IRS2	S560	NetworKIN	-0.170712		AKT3	IRS2	S560	NetworKIN	0.162723		AKT3	IRS2	S560	NetworKIN	0.0504492		AKT3	IRS2	S560	NetworKIN	0.277245
		AKT3	PPP1R3D	S74	NetworKIN	-0.197319		AKT3	PPP1R3D	S74	NetworKIN	-0.068637		AKT3	PPP1R3D	S74	NetworKIN	-0.104662		AKT3	PPP1R3D	S74	NetworKIN	-0.228887
		AKT3	BAD	S75	NetworKIN	-0.425042		AKT3	BAD	S75	NetworKIN	0.0516968		AKT3	BAD	S75	NetworKIN	0.16052		AKT3	BAD	S75	NetworKIN	0.130798
		AKT3	PPP1R3D	S78	NetworKIN	-0.212123		AKT3	PPP1R3D	S78	NetworKIN	-0.0847178		AKT3	PPP1R3D	S78	NetworKIN	-0.101799		AKT3	PPP1R3D	S78	NetworKIN	-0.236894
		AKT3	MAP2K4	S80	NetworKIN	0.0993864		AKT3	MAP2K4	S80	NetworKIN	1.3882		AKT3	MAP2K4	S80	NetworKIN	0.226514		AKT3	MAP2K4	S80	NetworKIN	0.180813
		AKT3	TSC2	S939	NetworKIN	-0.179627		AKT3	TSC2	S939	NetworKIN	-0.197138		AKT3	TSC2	S939	NetworKIN	-0.00135892		AKT3	TSC2	S939	NetworKIN	-0.0365394
		AKT3	NOS3	T1175	NetworKIN	-0.0383629		AKT3	NOS3	T1175	NetworKIN	0.379728		AKT3	NOS3	T1175	NetworKIN	0.37282		AKT3	NOS3	T1175	NetworKIN	0.342871
		AKT3	TSC2	T1462	NetworKIN	0.0392118		AKT3	TSC2	T1462	NetworKIN	0.223093		AKT3	TSC2	T1462	NetworKIN	0.100408		AKT3	TSC2	T1462	NetworKIN	-0.0246047
		ARAF	UBA1	S13	NetworKIN	0.446359		ARAF	UBA1	S13	NetworKIN	0.658326		ARAF	UBA1	S13	NetworKIN	0.396066		ARAF	UBA1	S13	NetworKIN	0.592907
		ARAF	HERC1	S1428	NetworKIN	0.213874		ARAF	HERC1	S1428	NetworKIN	0.117946		ARAF	HERC1	S1428	NetworKIN	0.204768		ARAF	HERC1	S1428	NetworKIN	-0.0319589
		ARAF	HERC1	S1510	NetworKIN	-0.21539		ARAF	HERC1	S1510	NetworKIN	0.0692845		ARAF	HERC1	S1510	NetworKIN	-0.0511151		ARAF	HERC1	S1510	NetworKIN	0.0231062
		ARAF	HERC1	S1512	NetworKIN	0.00776248		ARAF	HERC1	S1512	NetworKIN	0.216814		ARAF	HERC1	S1512	NetworKIN	0.102683		ARAF	HERC1	S1512	NetworKIN	0.218772
		ARAF	ARAF	S157	NetworKIN	0.00373955		ARAF	ARAF	S157	NetworKIN	-0.170938		ARAF	ARAF	S157	NetworKIN	0.0555277		ARAF	ARAF	S157	NetworKIN	0.0575498
		ARAF	ARAF	S186	NetworKIN	-0.0510334		ARAF	ARAF	S186	NetworKIN	0.315746		ARAF	ARAF	S186	NetworKIN	0.048951		ARAF	ARAF	S186	NetworKIN	0.60593
		ARAF	YWHAZ	S207	NetworKIN	-0.494625		ARAF	YWHAZ	S207	NetworKIN	0.570137		ARAF	YWHAZ	S207	NetworKIN	0.665094		ARAF	YWHAZ	S207	NetworKIN	0.242573
		ARAF	ARAF	S214	NetworKIN	0.00338245		ARAF	ARAF	S214	NetworKIN	0.12485		ARAF	ARAF	S214	NetworKIN	0.165682		ARAF	ARAF	S214	NetworKIN	0.0676598
		ARAF	PRKCA	S226	NetworKIN	-0.366373		ARAF	PRKCA	S226	NetworKIN	0.287196		ARAF	PRKCA	S226	NetworKIN	0.302473		ARAF	PRKCA	S226	NetworKIN	0.144232
		ARAF	MAP2K2	S23	NetworKIN	-0.220085		ARAF	MAP2K2	S23	NetworKIN	0.941257		ARAF	MAP2K2	S23	NetworKIN	-0.228346		ARAF	MAP2K2	S23	NetworKIN	1.23413
		ARAF	ARAF	S257	NetworKIN	-0.649631		ARAF	ARAF	S257	NetworKIN	-0.444648		ARAF	ARAF	S257	NetworKIN	0.344117		ARAF	ARAF	S257	NetworKIN	-0.0566116
		ARAF	MAP2K2	S295	NetworKIN	0.32474		ARAF	MAP2K2	S295	NetworKIN	0.12501		ARAF	MAP2K2	S295	NetworKIN	0.000823958		ARAF	MAP2K2	S295	NetworKIN	0.738015
		ARAF	PRKCA	S319	NetworKIN	0.305493		ARAF	PRKCA	S319	NetworKIN	0.672694		ARAF	PRKCA	S319	NetworKIN	0.100497		ARAF	PRKCA	S319	NetworKIN	1.36503
		ARAF	PRKCE	S337	NetworKIN	-0.40447		ARAF	PRKCE	S337	NetworKIN	0.774299		ARAF	PRKCE	S337	NetworKIN	0.0879153		ARAF	PRKCE	S337	NetworKIN	0.0835642
		ARAF	BRAF	S365	NetworKIN	-0.268018		ARAF	BRAF	S365	NetworKIN	0.283472		ARAF	BRAF	S365	NetworKIN	0.171114		ARAF	BRAF	S365	NetworKIN	0.0967049
		ARAF	PRKCE	S368	NetworKIN	0.326971		ARAF	PRKCE	S368	NetworKIN	1.48311		ARAF	PRKCE	S368	NetworKIN	0.640517		ARAF	PRKCE	S368	NetworKIN	0.191239
		ARAF	TBC1D25	S506	NetworKIN	-0.0987205		ARAF	TBC1D25	S506	NetworKIN	0.232678		ARAF	TBC1D25	S506	NetworKIN	0.049204		ARAF	TBC1D25	S506	NetworKIN	0.0806785
		ARAF	PRKCD	S645	NetworKIN	-1.07038		ARAF	PRKCD	S645	NetworKIN	0.459041		ARAF	PRKCD	S645	NetworKIN	-0.229784		ARAF	PRKCD	S645	NetworKIN	0.165523
		ARAF	PRKCD	S664	NetworKIN	-1.16106		ARAF	PRKCD	S664	NetworKIN	0.575361		ARAF	PRKCD	S664	NetworKIN	-0.543803		ARAF	PRKCD	S664	NetworKIN	0.419736
		ARAF	BRAF	S729	NetworKIN	-0.157515		ARAF	BRAF	S729	NetworKIN	-0.0881678		ARAF	BRAF	S729	NetworKIN	-0.0611345		ARAF	BRAF	S729	NetworKIN	-0.334362
		ARAF	PRKCE	S729	NetworKIN	0.115593		ARAF	PRKCE	S729	NetworKIN	0.169051		ARAF	PRKCE	S729	NetworKIN	0.63326		ARAF	PRKCE	S729	NetworKIN	0.0836982
		ARAF	UBA1	S816	NetworKIN	-0.119804		ARAF	UBA1	S816	NetworKIN	0.74557		ARAF	UBA1	S816	NetworKIN	0.147538		ARAF	UBA1	S816	NetworKIN	0.435282
		ARAF	UBA1	S820	NetworKIN	-0.118002		ARAF	UBA1	S820	NetworKIN	0.815733		ARAF	UBA1	S820	NetworKIN	0.135843		ARAF	UBA1	S820	NetworKIN	0.452004
		ARAF	ARAF	T181	NetworKIN	-0.26486		ARAF	ARAF	T181	NetworKIN	0.649239		ARAF	ARAF	T181	NetworKIN	-0.0173303		ARAF	ARAF	T181	NetworKIN	0.248859
		ARAF	HERC1	T2701	NetworKIN	-0.512518		ARAF	HERC1	T2701	NetworKIN	-0.120665		ARAF	HERC1	T2701	NetworKIN	0.235041		ARAF	HERC1	T2701	NetworKIN	-0.196292
		ATM	UBE4B	S101	NetworKIN	1.03231		ATM	UBE4B	S101	NetworKIN	1.19473		ATM	UBE4B	S101	NetworKIN	-0.0311297		ATM	UBE4B	S101	NetworKIN	0.369109
		ATM	SMC3	S1067	NetworKIN	-0.264537		ATM	SMC3	S1067	NetworKIN	0.154629		ATM	SMC3	S1067	NetworKIN	0.18749		ATM	SMC3	S1067	NetworKIN	-0.23773
		ATM	TP53BP1	S1073	NetworKIN	-0.0419283		ATM	TP53BP1	S1073	NetworKIN	0.0558922		ATM	TP53BP1	S1073	NetworKIN	0.220768		ATM	TP53BP1	S1073	NetworKIN	-0.0987133
		ATM	TP53BP1	S1224	NetworKIN	-0.296648		ATM	TP53BP1	S1224	NetworKIN	0.0950661		ATM	TP53BP1	S1224	NetworKIN	0.199023		ATM	TP53BP1	S1224	NetworKIN	-0.310979
		ATM	MAPK14	S2	NetworKIN	-0.121063		ATM	MAPK14	S2	NetworKIN	-0.329715		ATM	MAPK14	S2	NetworKIN	-0.225855		ATM	MAPK14	S2	NetworKIN	-0.339047
		ATM	HNRNPA2B1	S212	NetworKIN	-0.319171		ATM	HNRNPA2B1	S212	NetworKIN	0.308178		ATM	HNRNPA2B1	S212	NetworKIN	-0.15236		ATM	HNRNPA2B1	S212	NetworKIN	-0.163519
		ATM	UBE4B	S23	NetworKIN	-0.00524594		ATM	UBE4B	S23	NetworKIN	0.136588		ATM	UBE4B	S23	NetworKIN	0.637113		ATM	UBE4B	S23	NetworKIN	0.317689
		ATM	ADRB2	S246	NetworKIN	0.0153979		ATM	ADRB2	S246	NetworKIN	0.273078		ATM	ADRB2	S246	NetworKIN	0.382648		ATM	ADRB2	S246	NetworKIN	0.148041
		ATM	PRKD1	S249	NetworKIN	-0.00509026		ATM	PRKD1	S249	NetworKIN	0.611221		ATM	PRKD1	S249	NetworKIN	0.634209		ATM	PRKD1	S249	NetworKIN	-0.137526
		ATM	TAOK3	S324	NetworKIN	-0.231611		ATM	TAOK3	S324	NetworKIN	0.415671		ATM	TAOK3	S324	NetworKIN	0.090306		ATM	TAOK3	S324	NetworKIN	-0.013295
		ATM	NUP107	S37	NetworKIN	-0.113072		ATM	NUP107	S37	NetworKIN	0.700341		ATM	NUP107	S37	NetworKIN	0.117119		ATM	NUP107	S37	NetworKIN	0.132865
		ATM	LMNA	S407	NetworKIN	-0.221268		ATM	LMNA	S407	NetworKIN	0.647283		ATM	LMNA	S407	NetworKIN	-0.0541878		ATM	LMNA	S407	NetworKIN	0.351411
		ATM	PPP2R5A	S42	NetworKIN	-0.388945		ATM	PPP2R5A	S42	NetworKIN	-0.161755		ATM	PPP2R5A	S42	NetworKIN	-0.0970852		ATM	PPP2R5A	S42	NetworKIN	-0.103596
		ATM	EPB41L1	S437	NetworKIN	-0.976887		ATM	EPB41L1	S437	NetworKIN	0.0865176		ATM	EPB41L1	S437	NetworKIN	0.198538		ATM	EPB41L1	S437	NetworKIN	0.150127
		ATM	VIM	S459	NetworKIN	-0.66396		ATM	VIM	S459	NetworKIN	0.300807		ATM	VIM	S459	NetworKIN	0.252476		ATM	VIM	S459	NetworKIN	0.252128
		ATM	SLC2A1	S490	NetworKIN	-0.849588		ATM	SLC2A1	S490	NetworKIN	0.390369		ATM	SLC2A1	S490	NetworKIN	-0.325881		ATM	SLC2A1	S490	NetworKIN	0.333732
		ATM	TRIM28	S501	NetworKIN	-0.388521		ATM	TRIM28	S501	NetworKIN	0.0729459		ATM	TRIM28	S501	NetworKIN	0.0786794		ATM	TRIM28	S501	NetworKIN	0.394748
		ATM	CLASP1	S559	NetworKIN	-0.748901		ATM	CLASP1	S559	NetworKIN	-0.0712713		ATM	CLASP1	S559	NetworKIN	0.139206		ATM	CLASP1	S559	NetworKIN	-0.0432786
		ATM	CLASP1	S598	NetworKIN	-0.0870856		ATM	CLASP1	S598	NetworKIN	0.106178		ATM	CLASP1	S598	NetworKIN	0.338795		ATM	CLASP1	S598	NetworKIN	0.0286844
		ATM	CTNNA1	S652	NetworKIN	0.148053		ATM	CTNNA1	S652	NetworKIN	0.121792		ATM	CTNNA1	S652	NetworKIN	0.106366		ATM	CTNNA1	S652	NetworKIN	-0.11012
		ATM	CD44	S706	NetworKIN	-0.529749		ATM	CD44	S706	NetworKIN	0.155817		ATM	CD44	S706	NetworKIN	0.105141		ATM	CD44	S706	NetworKIN	0.0277723
		ATM	TP53BP1	S836	NetworKIN	0.287126		ATM	TP53BP1	S836	NetworKIN	0.302219		ATM	TP53BP1	S836	NetworKIN	0.839244		ATM	TP53BP1	S836	NetworKIN	0.280365
		ATM	PURA	T183	NetworKIN	-0.227077		ATM	PURA	T183	NetworKIN	0.295569		ATM	PURA	T183	NetworKIN	0.112736		ATM	PURA	T183	NetworKIN	0.151407
		ATM	LMNA	T409	NetworKIN	-0.15288		ATM	LMNA	T409	NetworKIN	0.331106		ATM	LMNA	T409	NetworKIN	0.223486		ATM	LMNA	T409	NetworKIN	0.19879
		ATR	TP53BP1	S1073	NetworKIN	-0.0419283		ATR	TP53BP1	S1073	NetworKIN	0.0558922		ATR	TP53BP1	S1073	NetworKIN	0.220768		ATR	TP53BP1	S1073	NetworKIN	-0.0987133
		ATR	TP53BP1	S1224	NetworKIN	-0.296648		ATR	TP53BP1	S1224	NetworKIN	0.0950661		ATR	TP53BP1	S1224	NetworKIN	0.199023		ATR	TP53BP1	S1224	NetworKIN	-0.310979
		ATR	NUP107	S37	NetworKIN	-0.113072		ATR	NUP107	S37	NetworKIN	0.700341		ATR	NUP107	S37	NetworKIN	0.117119		ATR	NUP107	S37	NetworKIN	0.132865
		ATR	TP53BP1	S836	NetworKIN	0.287126		ATR	TP53BP1	S836	NetworKIN	0.302219		ATR	TP53BP1	S836	NetworKIN	0.839244		ATR	TP53BP1	S836	NetworKIN	0.280365
		AURKA	PSMD11	S14	NetworKIN	-0.0281957		AURKA	PSMD11	S14	NetworKIN	1.16118		AURKA	PSMD11	S14	NetworKIN	-0.0572608		AURKA	PSMD11	S14	NetworKIN	-0.0966174
		AURKA	PSMD2	S16	NetworKIN	-0.186299		AURKA	PSMD2	S16	NetworKIN	0.213397		AURKA	PSMD2	S16	NetworKIN	0.386097		AURKA	PSMD2	S16	NetworKIN	0.730443
		AURKA	PSMA3	S243	NetworKIN	-0.487006		AURKA	PSMA3	S243	NetworKIN	0.0727218		AURKA	PSMA3	S243	NetworKIN	0.197631		AURKA	PSMA3	S243	NetworKIN	-0.0012723
		AURKA	PSMC4	S28	NetworKIN	0.297668		AURKA	PSMC4	S28	NetworKIN	0.831791		AURKA	PSMC4	S28	NetworKIN	0.014569		AURKA	PSMC4	S28	NetworKIN	0.427154
		AURKA	PSMD1	S315	NetworKIN	-0.690712		AURKA	PSMD1	S315	NetworKIN	0.0135218		AURKA	PSMD1	S315	NetworKIN	0.916527		AURKA	PSMD1	S315	NetworKIN	0.0847997
		AURKA	PRKACA	S339	NetworKIN	-0.413614		AURKA	PRKACA	S339	NetworKIN	0.155225		AURKA	PRKACA	S339	NetworKIN	0.215381		AURKA	PRKACA	S339	NetworKIN	-0.0109695
		AURKA	CDC26	S42	NetworKIN	-0.28092		AURKA	CDC26	S42	NetworKIN	0.197652		AURKA	CDC26	S42	NetworKIN	0.808221		AURKA	CDC26	S42	NetworKIN	0.022477
		AURKA	HDAC3	S424	NetworKIN	-0.416101		AURKA	HDAC3	S424	NetworKIN	0.254998		AURKA	HDAC3	S424	NetworKIN	0.174618		AURKA	HDAC3	S424	NetworKIN	0.0248345
		AURKA	CLASP1	S559	NetworKIN	-0.748901		AURKA	CLASP1	S559	NetworKIN	-0.0712713		AURKA	CLASP1	S559	NetworKIN	0.139206		AURKA	CLASP1	S559	NetworKIN	-0.0432786
		AURKA	PSMA5	S56	NetworKIN	-0.278007		AURKA	PSMA5	S56	NetworKIN	0.164546		AURKA	PSMA5	S56	NetworKIN	0.226747		AURKA	PSMA5	S56	NetworKIN	0.505129
		AURKA	CLASP1	S598	NetworKIN	-0.0870856		AURKA	CLASP1	S598	NetworKIN	0.106178		AURKA	CLASP1	S598	NetworKIN	0.338795		AURKA	CLASP1	S598	NetworKIN	0.0286844
		AURKA	CLASP1	S600	NetworKIN	-0.134784		AURKA	CLASP1	S600	NetworKIN	0.202894		AURKA	CLASP1	S600	NetworKIN	0.135309		AURKA	CLASP1	S600	NetworKIN	-0.0439373
		AURKA	PSMA6	S63	NetworKIN	-0.149762		AURKA	PSMA6	S63	NetworKIN	0.119621		AURKA	PSMA6	S63	NetworKIN	0.0719525		AURKA	PSMA6	S63	NetworKIN	-0.0815405
		AURKA	PSMA6	S64	NetworKIN	0.0054813		AURKA	PSMA6	S64	NetworKIN	-0.146147		AURKA	PSMA6	S64	NetworKIN	0.0121572		AURKA	PSMA6	S64	NetworKIN	-0.133372
		AURKA	CTNNA1	S655	NetworKIN	0.265894		AURKA	CTNNA1	S655	NetworKIN	0.274197		AURKA	CTNNA1	S655	NetworKIN	0.234132		AURKA	CTNNA1	S655	NetworKIN	-0.122773
		AURKA	CLASP1	S687	NetworKIN	-0.0993369		AURKA	CLASP1	S687	NetworKIN	-0.0819915		AURKA	CLASP1	S687	NetworKIN	-0.0107218		AURKA	CLASP1	S687	NetworKIN	-0.0586988
		AURKA	ANAPC4	S779	NetworKIN	-0.448973		AURKA	ANAPC4	S779	NetworKIN	0.448792		AURKA	ANAPC4	S779	NetworKIN	0.881416		AURKA	ANAPC4	S779	NetworKIN	-0.17674
		AURKA	CLASP1	S797	NetworKIN	-0.546852		AURKA	CLASP1	S797	NetworKIN	0.110213		AURKA	CLASP1	S797	NetworKIN	0.280086		AURKA	CLASP1	S797	NetworKIN	0.0709818
		AURKA	NME1	T119	NetworKIN	-0.282849		AURKA	NME1	T119	NetworKIN	-0.0167096		AURKA	NME1	T119	NetworKIN	0.121139		AURKA	NME1	T119	NetworKIN	-0.0015777
		AURKA	PSMD1	T273	NetworKIN	-0.119107		AURKA	PSMD1	T273	NetworKIN	0.612823		AURKA	PSMD1	T273	NetworKIN	0.831272		AURKA	PSMD1	T273	NetworKIN	1.77765
		AURKA	PSMD1	T311	NetworKIN	-0.664552		AURKA	PSMD1	T311	NetworKIN	-0.00262254		AURKA	PSMD1	T311	NetworKIN	0.832123		AURKA	PSMD1	T311	NetworKIN	0.0750764
		AURKB	PSMD11	S14	NetworKIN	-0.0281957		AURKB	PSMD11	S14	NetworKIN	1.16118		AURKB	PSMD11	S14	NetworKIN	-0.0572608		AURKB	PSMD11	S14	NetworKIN	-0.0966174
		AURKB	CLIP1	S195	NetworKIN	-0.423109		AURKB	CLIP1	S195	NetworKIN	0.364029		AURKB	CLIP1	S195	NetworKIN	0.116205		AURKB	CLIP1	S195	NetworKIN	0.0534907
		AURKB	CLIP1	S197	NetworKIN	-1.00793		AURKB	CLIP1	S197	NetworKIN	-0.379959		AURKB	CLIP1	S197	NetworKIN	0.370521		AURKB	CLIP1	S197	NetworKIN	-0.163016
		AURKB	CLIP1	S200	NetworKIN	-0.583199		AURKB	CLIP1	S200	NetworKIN	0.235591		AURKB	CLIP1	S200	NetworKIN	0.506674		AURKB	CLIP1	S200	NetworKIN	0.0716068
		AURKB	PSMA3	S243	NetworKIN	-0.487006		AURKB	PSMA3	S243	NetworKIN	0.0727218		AURKB	PSMA3	S243	NetworKIN	0.197631		AURKB	PSMA3	S243	NetworKIN	-0.0012723
		AURKB	VIM	S25	NetworKIN	-0.346223		AURKB	VIM	S25	NetworKIN	0.452175		AURKB	VIM	S25	NetworKIN	0.404373		AURKB	VIM	S25	NetworKIN	0.0636407
		AURKB	PSMC4	S28	NetworKIN	0.297668		AURKB	PSMC4	S28	NetworKIN	0.831791		AURKB	PSMC4	S28	NetworKIN	0.014569		AURKB	PSMC4	S28	NetworKIN	0.427154
		AURKB	CLIP1	S348	NetworKIN	0.00813111		AURKB	CLIP1	S348	NetworKIN	0.605414		AURKB	CLIP1	S348	NetworKIN	0.683204		AURKB	CLIP1	S348	NetworKIN	-0.372141
		AURKB	VIM	S39	NetworKIN	-0.196733		AURKB	VIM	S39	NetworKIN	0.750871		AURKB	VIM	S39	NetworKIN	0.182388		AURKB	VIM	S39	NetworKIN	-0.0635193
		AURKB	VIM	S419	NetworKIN	-0.449961		AURKB	VIM	S419	NetworKIN	0.117757		AURKB	VIM	S419	NetworKIN	0.100985		AURKB	VIM	S419	NetworKIN	-0.076825
		AURKB	VIM	S420	NetworKIN	-0.304302		AURKB	VIM	S420	NetworKIN	0.382184		AURKB	VIM	S420	NetworKIN	0.177381		AURKB	VIM	S420	NetworKIN	-0.0792213
		AURKB	VIM	S459	NetworKIN	-0.66396		AURKB	VIM	S459	NetworKIN	0.300807		AURKB	VIM	S459	NetworKIN	0.252476		AURKB	VIM	S459	NetworKIN	0.252128
		AURKB	VIM	S47	NetworKIN	-0.452957		AURKB	VIM	S47	NetworKIN	0.356683		AURKB	VIM	S47	NetworKIN	0.169109		AURKB	VIM	S47	NetworKIN	-0.132172
		AURKB	VIM	S5	NetworKIN	-0.855256		AURKB	VIM	S5	NetworKIN	0.380469		AURKB	VIM	S5	NetworKIN	0.163493		AURKB	VIM	S5	NetworKIN	0.685498
		AURKB	PEBP1	S52	NetworKIN	-0.213757		AURKB	PEBP1	S52	NetworKIN	0.322299		AURKB	PEBP1	S52	NetworKIN	0.489625		AURKB	PEBP1	S52	NetworKIN	0.165104
		AURKB	CLASP1	S559	NetworKIN	-0.748901		AURKB	CLASP1	S559	NetworKIN	-0.0712713		AURKB	CLASP1	S559	NetworKIN	0.139206		AURKB	CLASP1	S559	NetworKIN	-0.0432786
		AURKB	CLASP1	S600	NetworKIN	-0.134784		AURKB	CLASP1	S600	NetworKIN	0.202894		AURKB	CLASP1	S600	NetworKIN	0.135309		AURKB	CLASP1	S600	NetworKIN	-0.0439373
		AURKB	PSMA6	S63	NetworKIN	-0.149762		AURKB	PSMA6	S63	NetworKIN	0.119621		AURKB	PSMA6	S63	NetworKIN	0.0719525		AURKB	PSMA6	S63	NetworKIN	-0.0815405
		AURKB	DES	S68	NetworKIN	-0.290582		AURKB	DES	S68	NetworKIN	0.0493451		AURKB	DES	S68	NetworKIN	-0.00276076		AURKB	DES	S68	NetworKIN	-0.0587937
		AURKB	CLASP1	S687	NetworKIN	-0.0993369		AURKB	CLASP1	S687	NetworKIN	-0.0819915		AURKB	CLASP1	S687	NetworKIN	-0.0107218		AURKB	CLASP1	S687	NetworKIN	-0.0586988
		AURKB	VIM	S72	NetworKIN	-0.772996		AURKB	VIM	S72	NetworKIN	0.257668		AURKB	VIM	S72	NetworKIN	-0.10468		AURKB	VIM	S72	NetworKIN	0.294279
		AURKB	ANAPC4	S779	NetworKIN	-0.448973		AURKB	ANAPC4	S779	NetworKIN	0.448792		AURKB	ANAPC4	S779	NetworKIN	0.881416		AURKB	ANAPC4	S779	NetworKIN	-0.17674
		AURKB	CLASP1	S797	NetworKIN	-0.546852		AURKB	CLASP1	S797	NetworKIN	0.110213		AURKB	CLASP1	S797	NetworKIN	0.280086		AURKB	CLASP1	S797	NetworKIN	0.0709818
		AURKB	TAOK1	S965	NetworKIN	-0.481127		AURKB	TAOK1	S965	NetworKIN	-0.130136		AURKB	TAOK1	S965	NetworKIN	0.169644		AURKB	TAOK1	S965	NetworKIN	-0.152023
		AURKB	CLIP1	T182	NetworKIN	-0.664763		AURKB	CLIP1	T182	NetworKIN	0.141083		AURKB	CLIP1	T182	NetworKIN	0.326972		AURKB	CLIP1	T182	NetworKIN	-0.048835
		AURKB	CLIP1	T191	NetworKIN	-0.760161		AURKB	CLIP1	T191	NetworKIN	-0.109779		AURKB	CLIP1	T191	NetworKIN	0.301468		AURKB	CLIP1	T191	NetworKIN	-0.453582
		AURKB	CLIP1	T350	NetworKIN	0.287849		AURKB	CLIP1	T350	NetworKIN	0.732263		AURKB	CLIP1	T350	NetworKIN	0.049306		AURKB	CLIP1	T350	NetworKIN	-0.358921
		AURKB	VIM	T48	NetworKIN	-0.384247		AURKB	VIM	T48	NetworKIN	0.645736		AURKB	VIM	T48	NetworKIN	0.147022		AURKB	VIM	T48	NetworKIN	0.173799
		BCKDK	CKB	S163	NetworKIN	-0.203197		BCKDK	CKB	S163	NetworKIN	-0.0266167		BCKDK	CKB	S163	NetworKIN	0.293155		BCKDK	CKB	S163	NetworKIN	-0.017729
		BCKDK	CKB	S178	NetworKIN	-0.204237		BCKDK	CKB	S178	NetworKIN	0.395192		BCKDK	CKB	S178	NetworKIN	0.551751		BCKDK	CKB	S178	NetworKIN	0.0203519
		BCKDK	SUMO1	S2	NetworKIN	-0.816545		BCKDK	SUMO1	S2	NetworKIN	-0.0337032		BCKDK	SUMO1	S2	NetworKIN	0.391683		BCKDK	SUMO1	S2	NetworKIN	-0.317001
		BCKDK	BCKDK	S31	NetworKIN	-0.00892275		BCKDK	BCKDK	S31	NetworKIN	0.00709128		BCKDK	BCKDK	S31	NetworKIN	0.137387		BCKDK	BCKDK	S31	NetworKIN	-0.015688
		BCKDK	BCKDK	T35	NetworKIN	-0.00918954		BCKDK	BCKDK	T35	NetworKIN	0.199518		BCKDK	BCKDK	T35	NetworKIN	0.252426		BCKDK	BCKDK	T35	NetworKIN	0.0909552
		BMX	CAV1	Y14	NetworKIN	-0.184943		BMX	CAV1	Y14	NetworKIN	-0.0917786		BMX	CAV1	Y14	NetworKIN	-0.0999114		BMX	CAV1	Y14	NetworKIN	-0.231833
		CAMK1	GAPDH	S148	NetworKIN	-0.403012		CAMK1	GAPDH	S148	NetworKIN	-0.610898		CAMK1	GAPDH	S148	NetworKIN	-0.124703		CAMK1	GAPDH	S148	NetworKIN	-0.209602
		CAMK1	GAPDH	S151	NetworKIN	-0.323501		CAMK1	GAPDH	S151	NetworKIN	-0.131475		CAMK1	GAPDH	S151	NetworKIN	-0.0220425		CAMK1	GAPDH	S151	NetworKIN	0.0134128
		CAMK1	HDAC4	S210	NetworKIN	-0.363097		CAMK1	HDAC4	S210	NetworKIN	0.406476		CAMK1	HDAC4	S210	NetworKIN	0.273035		CAMK1	HDAC4	S210	NetworKIN	-0.138032
		CAMK1	HDAC4	S246	NetworKIN	-0.888715		CAMK1	HDAC4	S246	NetworKIN	-0.127961		CAMK1	HDAC4	S246	NetworKIN	0.635048		CAMK1	HDAC4	S246	NetworKIN	-0.109519
		CAMK1	HDAC4	S467	NetworKIN	-0.210882		CAMK1	HDAC4	S467	NetworKIN	0.581791		CAMK1	HDAC4	S467	NetworKIN	0.405821		CAMK1	HDAC4	S467	NetworKIN	-0.162936
		CAMK1	HDAC4	S565	NetworKIN	0.115336		CAMK1	HDAC4	S565	NetworKIN	0.395555		CAMK1	HDAC4	S565	NetworKIN	0.267743		CAMK1	HDAC4	S565	NetworKIN	-0.125586
		CAMK1	HDAC4	S632	NetworKIN	-0.373879		CAMK1	HDAC4	S632	NetworKIN	0.633305		CAMK1	HDAC4	S632	NetworKIN	0.53748		CAMK1	HDAC4	S632	NetworKIN	-0.305869
		CAMK1	HDAC4	S633	NetworKIN	-0.218031		CAMK1	HDAC4	S633	NetworKIN	0.378919		CAMK1	HDAC4	S633	NetworKIN	0.194868		CAMK1	HDAC4	S633	NetworKIN	-0.142645
		CAMK1	HDAC4	S636	NetworKIN	-0.0154359		CAMK1	HDAC4	S636	NetworKIN	2.17983		CAMK1	HDAC4	S636	NetworKIN	0.300433		CAMK1	HDAC4	S636	NetworKIN	0.1324
		CAMK1	PRKAR2A	S78	NetworKIN	-0.334124		CAMK1	PRKAR2A	S78	NetworKIN	0.163518		CAMK1	PRKAR2A	S78	NetworKIN	0.130566		CAMK1	PRKAR2A	S78	NetworKIN	0.0710053
		CAMK1	PRKAR2A	S80	NetworKIN	-0.182898		CAMK1	PRKAR2A	S80	NetworKIN	0.127132		CAMK1	PRKAR2A	S80	NetworKIN	0.0832369		CAMK1	PRKAR2A	S80	NetworKIN	0.0238706
		CAMK1	GAPDH	S83	NetworKIN	-0.341329		CAMK1	GAPDH	S83	NetworKIN	-0.0671924		CAMK1	GAPDH	S83	NetworKIN	0.130685		CAMK1	GAPDH	S83	NetworKIN	-0.0366405
		CAMK1	PRKAR2A	S99	NetworKIN	-0.0930411		CAMK1	PRKAR2A	S99	NetworKIN	-0.0209813		CAMK1	PRKAR2A	S99	NetworKIN	-0.0103187		CAMK1	PRKAR2A	S99	NetworKIN	-0.0161239
		CAMK1	PRKAR2A	T104	NetworKIN	-0.076431		CAMK1	PRKAR2A	T104	NetworKIN	-0.196348		CAMK1	PRKAR2A	T104	NetworKIN	0.0190854		CAMK1	PRKAR2A	T104	NetworKIN	-0.0991012
		CAMK1	GAPDH	T182	NetworKIN	-0.198968		CAMK1	GAPDH	T182	NetworKIN	-0.136713		CAMK1	GAPDH	T182	NetworKIN	0.118191		CAMK1	GAPDH	T182	NetworKIN	-0.0399335
		CAMK1	GAPDH	T184	NetworKIN	-0.132569		CAMK1	GAPDH	T184	NetworKIN	0.0186549		CAMK1	GAPDH	T184	NetworKIN	0.000878795		CAMK1	GAPDH	T184	NetworKIN	-0.102206
		CAMK1	GAPDH	T211	NetworKIN	-0.214885		CAMK1	GAPDH	T211	NetworKIN	0.0239421		CAMK1	GAPDH	T211	NetworKIN	-0.0124752		CAMK1	GAPDH	T211	NetworKIN	-0.0239877
		CAMK1D	CAMK2D	S276	NetworKIN	-0.306649		CAMK1D	CAMK2D	S276	NetworKIN	-0.197038		CAMK1D	CAMK2D	S276	NetworKIN	-0.0797914		CAMK1D	CAMK2D	S276	NetworKIN	-0.159815
		CAMK1D	CAMK2D	S280	NetworKIN	-0.450589		CAMK1D	CAMK2D	S280	NetworKIN	-0.001264		CAMK1D	CAMK2D	S280	NetworKIN	-0.11103		CAMK1D	CAMK2D	S280	NetworKIN	0.0656312
		CAMK1D	CAMK2D	S333	NetworKIN	-0.560425		CAMK1D	CAMK2D	S333	NetworKIN	-0.211429		CAMK1D	CAMK2D	S333	NetworKIN	0.338293		CAMK1D	CAMK2D	S333	NetworKIN	-0.229111
		CAMK1D	CAMK2D	T287	NetworKIN	-0.43146		CAMK1D	CAMK2D	T287	NetworKIN	-0.108585		CAMK1D	CAMK2D	T287	NetworKIN	0.182799		CAMK1D	CAMK2D	T287	NetworKIN	-0.321167
		CAMK1D	CAMK2D	T306	NetworKIN	0.215898		CAMK1D	CAMK2D	T306	NetworKIN	0.210011		CAMK1D	CAMK2D	T306	NetworKIN	0.0687733		CAMK1D	CAMK2D	T306	NetworKIN	0.0784329
		CAMK1D	CAMK2D	T307	NetworKIN	-0.0448173		CAMK1D	CAMK2D	T307	NetworKIN	0.330909		CAMK1D	CAMK2D	T307	NetworKIN	0.179988		CAMK1D	CAMK2D	T307	NetworKIN	0.13051
		CAMK1D	CAMK2D	T336	NetworKIN	-0.362752		CAMK1D	CAMK2D	T336	NetworKIN	0.179348		CAMK1D	CAMK2D	T336	NetworKIN	0.253256		CAMK1D	CAMK2D	T336	NetworKIN	-0.241091
		CAMK2A	OTUD7B	S100	NetworKIN	0.169617		CAMK2A	OTUD7B	S100	NetworKIN	0.270463		CAMK2A	OTUD7B	S100	NetworKIN	0.0730626		CAMK2A	OTUD7B	S100	NetworKIN	-0.0693833
		CAMK2A	PPP1R9B	S100	NetworKIN	-0.48468		CAMK2A	PPP1R9B	S100	NetworKIN	0.409231		CAMK2A	PPP1R9B	S100	NetworKIN	-0.0241021		CAMK2A	PPP1R9B	S100	NetworKIN	0.141376
		CAMK2A	PHKA2	S1015	NetworKIN	0.0683123		CAMK2A	PHKA2	S1015	NetworKIN	0.360924		CAMK2A	PHKA2	S1015	NetworKIN	0.494919		CAMK2A	PHKA2	S1015	NetworKIN	0.142923
		CAMK2A	ARHGAP12	S103	NetworKIN	-0.329309		CAMK2A	ARHGAP12	S103	NetworKIN	0.207912		CAMK2A	ARHGAP12	S103	NetworKIN	0.30152		CAMK2A	ARHGAP12	S103	NetworKIN	-0.0994734
		CAMK2A	UBE4B	S105	NetworKIN	-0.152933		CAMK2A	UBE4B	S105	NetworKIN	0.0737037		CAMK2A	UBE4B	S105	NetworKIN	0.0562551		CAMK2A	UBE4B	S105	NetworKIN	-0.053079
		CAMK2A	MYO18A	S1067	NetworKIN	0.731464		CAMK2A	MYO18A	S1067	NetworKIN	0.407714		CAMK2A	MYO18A	S1067	NetworKIN	0.0268157		CAMK2A	MYO18A	S1067	NetworKIN	-0.0332869
		CAMK2A	MPP1	S110	NetworKIN	-0.635461		CAMK2A	MPP1	S110	NetworKIN	0.105609		CAMK2A	MPP1	S110	NetworKIN	0.0480904		CAMK2A	MPP1	S110	NetworKIN	-0.203966
		CAMK2A	SRRM2	S1101	NetworKIN	-0.268351		CAMK2A	SRRM2	S1101	NetworKIN	-0.0847799		CAMK2A	SRRM2	S1101	NetworKIN	0.0838235		CAMK2A	SRRM2	S1101	NetworKIN	-0.202119
		CAMK2A	SGPP1	S112	NetworKIN	-0.301893		CAMK2A	SGPP1	S112	NetworKIN	0.0669711		CAMK2A	SGPP1	S112	NetworKIN	0.444076		CAMK2A	SGPP1	S112	NetworKIN	0.00127569
		CAMK2A	PRKAR2B	S114	NetworKIN	-0.177597		CAMK2A	PRKAR2B	S114	NetworKIN	0.0739622		CAMK2A	PRKAR2B	S114	NetworKIN	-0.020849		CAMK2A	PRKAR2B	S114	NetworKIN	-0.0592513
		CAMK2A	EGFR	S1166	NetworKIN	-0.742695		CAMK2A	EGFR	S1166	NetworKIN	0.181343		CAMK2A	EGFR	S1166	NetworKIN	0.0455547		CAMK2A	EGFR	S1166	NetworKIN	-0.0388756
		CAMK2A	BCL9L	S118	NetworKIN	-0.036619		CAMK2A	BCL9L	S118	NetworKIN	0.151742		CAMK2A	BCL9L	S118	NetworKIN	0.0326799		CAMK2A	BCL9L	S118	NetworKIN	0.0778603
		CAMK2A	RPL34	S12	NetworKIN	0.615236		CAMK2A	RPL34	S12	NetworKIN	0.159717		CAMK2A	RPL34	S12	NetworKIN	0.0620708		CAMK2A	RPL34	S12	NetworKIN	-0.241305
		CAMK2A	ZRANB2	S120	NetworKIN	-0.176926		CAMK2A	ZRANB2	S120	NetworKIN	0.0964374		CAMK2A	ZRANB2	S120	NetworKIN	0.132108		CAMK2A	ZRANB2	S120	NetworKIN	-0.026678
		CAMK2A	MAST2	S1256	NetworKIN	-0.127985		CAMK2A	MAST2	S1256	NetworKIN	-0.21237		CAMK2A	MAST2	S1256	NetworKIN	0.430809		CAMK2A	MAST2	S1256	NetworKIN	0.0181836
		CAMK2A	EHBP1L1	S1257	NetworKIN	-0.211727		CAMK2A	EHBP1L1	S1257	NetworKIN	0.132898		CAMK2A	EHBP1L1	S1257	NetworKIN	-0.0274223		CAMK2A	EHBP1L1	S1257	NetworKIN	0.04469
		CAMK2A	WDR33	S1279	NetworKIN	0.621308		CAMK2A	WDR33	S1279	NetworKIN	0.637582		CAMK2A	WDR33	S1279	NetworKIN	-0.0774855		CAMK2A	WDR33	S1279	NetworKIN	0.174856
		CAMK2A	NCBP2	S13	NetworKIN	-0.165972		CAMK2A	NCBP2	S13	NetworKIN	0.435596		CAMK2A	NCBP2	S13	NetworKIN	0.233655		CAMK2A	NCBP2	S13	NetworKIN	0.0160392
		CAMK2A	MAST2	S1337	NetworKIN	-0.208965		CAMK2A	MAST2	S1337	NetworKIN	0.144706		CAMK2A	MAST2	S1337	NetworKIN	0.259195		CAMK2A	MAST2	S1337	NetworKIN	0.073815
		CAMK2A	AHNAK	S135	NetworKIN	0.762756		CAMK2A	AHNAK	S135	NetworKIN	1.19147		CAMK2A	AHNAK	S135	NetworKIN	0.335223		CAMK2A	AHNAK	S135	NetworKIN	0.316187
		CAMK2A	TOR1AIP1	S135	NetworKIN	0.0770837		CAMK2A	TOR1AIP1	S135	NetworKIN	0.684217		CAMK2A	TOR1AIP1	S135	NetworKIN	0.105547		CAMK2A	TOR1AIP1	S135	NetworKIN	0.393843
		CAMK2A	PSMD11	S14	NetworKIN	-0.0281957		CAMK2A	PSMD11	S14	NetworKIN	1.16118		CAMK2A	PSMD11	S14	NetworKIN	-0.0572608		CAMK2A	PSMD11	S14	NetworKIN	-0.0966174
		CAMK2A	LEMD3	S140	NetworKIN	0.148568		CAMK2A	LEMD3	S140	NetworKIN	0.496256		CAMK2A	LEMD3	S140	NetworKIN	0.570096		CAMK2A	LEMD3	S140	NetworKIN	-0.0705634
		CAMK2A	TNS1	S1400	NetworKIN	-0.610619		CAMK2A	TNS1	S1400	NetworKIN	0.366748		CAMK2A	TNS1	S1400	NetworKIN	-0.0882265		CAMK2A	TNS1	S1400	NetworKIN	0.408224
		CAMK2A	HERC1	S1428	NetworKIN	0.213874		CAMK2A	HERC1	S1428	NetworKIN	0.117946		CAMK2A	HERC1	S1428	NetworKIN	0.204768		CAMK2A	HERC1	S1428	NetworKIN	-0.0319589
		CAMK2A	DIDO1	S1456	NetworKIN	-0.146193		CAMK2A	DIDO1	S1456	NetworKIN	0.597471		CAMK2A	DIDO1	S1456	NetworKIN	0.24774		CAMK2A	DIDO1	S1456	NetworKIN	0.325686
		CAMK2A	TNKS1BP1	S1473	NetworKIN	0.228144		CAMK2A	TNKS1BP1	S1473	NetworKIN	0.532877		CAMK2A	TNKS1BP1	S1473	NetworKIN	0.619774		CAMK2A	TNKS1BP1	S1473	NetworKIN	0.233983
		CAMK2A	PLIN5	S148	NetworKIN	0.0997802		CAMK2A	PLIN5	S148	NetworKIN	0.410689		CAMK2A	PLIN5	S148	NetworKIN	0.0759631		CAMK2A	PLIN5	S148	NetworKIN	-0.170501
		CAMK2A	HSPB1	S15	NetworKIN	1.34119		CAMK2A	HSPB1	S15	NetworKIN	1.87711		CAMK2A	HSPB1	S15	NetworKIN	-0.573784		CAMK2A	HSPB1	S15	NetworKIN	1.55372
		CAMK2A	ARFGEF1	S1569	NetworKIN	-0.619246		CAMK2A	ARFGEF1	S1569	NetworKIN	-0.156557		CAMK2A	ARFGEF1	S1569	NetworKIN	-0.176973		CAMK2A	ARFGEF1	S1569	NetworKIN	-0.0893954
		CAMK2A	HRC	S159	NetworKIN	-0.0923608		CAMK2A	HRC	S159	NetworKIN	-0.00397716		CAMK2A	HRC	S159	NetworKIN	-0.00286513		CAMK2A	HRC	S159	NetworKIN	0.108838
		CAMK2A	IQGAP2	S16	NetworKIN	-0.321261		CAMK2A	IQGAP2	S16	NetworKIN	0.432463		CAMK2A	IQGAP2	S16	NetworKIN	0.447431		CAMK2A	IQGAP2	S16	NetworKIN	0.15399
		CAMK2A	SIPA1L2	S160	NetworKIN	-0.0123162		CAMK2A	SIPA1L2	S160	NetworKIN	-0.00116505		CAMK2A	SIPA1L2	S160	NetworKIN	0.292348		CAMK2A	SIPA1L2	S160	NetworKIN	0.13706
		CAMK2A	TNKS1BP1	S1666	NetworKIN	-0.569693		CAMK2A	TNKS1BP1	S1666	NetworKIN	0.205916		CAMK2A	TNKS1BP1	S1666	NetworKIN	0.423344		CAMK2A	TNKS1BP1	S1666	NetworKIN	0.322208
		CAMK2A	FAM53B	S167	NetworKIN	-0.0363829		CAMK2A	FAM53B	S167	NetworKIN	0.0802461		CAMK2A	FAM53B	S167	NetworKIN	0.179391		CAMK2A	FAM53B	S167	NetworKIN	0.0372282
		CAMK2A	PRKRA	S167	NetworKIN	-0.0455332		CAMK2A	PRKRA	S167	NetworKIN	1.4823		CAMK2A	PRKRA	S167	NetworKIN	0.0100196		CAMK2A	PRKRA	S167	NetworKIN	0.115753
		CAMK2A	SRRM2	S1690	NetworKIN	0.235969		CAMK2A	SRRM2	S1690	NetworKIN	0.431382		CAMK2A	SRRM2	S1690	NetworKIN	-0.232013		CAMK2A	SRRM2	S1690	NetworKIN	0.101571
		CAMK2A	SRC	S17	NetworKIN	-0.963667		CAMK2A	SRC	S17	NetworKIN	0.12108		CAMK2A	SRC	S17	NetworKIN	-0.415743		CAMK2A	SRC	S17	NetworKIN	-0.00328094
		CAMK2A	EMD	S171	NetworKIN	-0.0574362		CAMK2A	EMD	S171	NetworKIN	0.116211		CAMK2A	EMD	S171	NetworKIN	0.102871		CAMK2A	EMD	S171	NetworKIN	0.0700021
		CAMK2A	TAF7	S171	NetworKIN	0.0131584		CAMK2A	TAF7	S171	NetworKIN	0.726044		CAMK2A	TAF7	S171	NetworKIN	0.229248		CAMK2A	TAF7	S171	NetworKIN	0.238955
		CAMK2A	MFF	S172	NetworKIN	-0.264048		CAMK2A	MFF	S172	NetworKIN	0.286398		CAMK2A	MFF	S172	NetworKIN	0.00460875		CAMK2A	MFF	S172	NetworKIN	-0.11537
		CAMK2A	OSBPL11	S174	NetworKIN	-0.0465518		CAMK2A	OSBPL11	S174	NetworKIN	0.07471		CAMK2A	OSBPL11	S174	NetworKIN	0.0864875		CAMK2A	OSBPL11	S174	NetworKIN	0.0600572
		CAMK2A	ARHGAP12	S176	NetworKIN	0.0994501		CAMK2A	ARHGAP12	S176	NetworKIN	0.719746		CAMK2A	ARHGAP12	S176	NetworKIN	0.275169		CAMK2A	ARHGAP12	S176	NetworKIN	-0.169353
		CAMK2A	NSFL1C	S176	NetworKIN	-0.0118047		CAMK2A	NSFL1C	S176	NetworKIN	0.876181		CAMK2A	NSFL1C	S176	NetworKIN	0.00185882		CAMK2A	NSFL1C	S176	NetworKIN	0.574824
		CAMK2A	PDAP1	S176	NetworKIN	-0.153463		CAMK2A	PDAP1	S176	NetworKIN	0.802759		CAMK2A	PDAP1	S176	NetworKIN	0.156931		CAMK2A	PDAP1	S176	NetworKIN	-0.0457348
		CAMK2A	PRKRA	S18	NetworKIN	-0.053805		CAMK2A	PRKRA	S18	NetworKIN	0.884508		CAMK2A	PRKRA	S18	NetworKIN	-0.0921893		CAMK2A	PRKRA	S18	NetworKIN	0.139469
		CAMK2A	PLEKHA2	S184	NetworKIN	-0.476518		CAMK2A	PLEKHA2	S184	NetworKIN	0.330326		CAMK2A	PLEKHA2	S184	NetworKIN	0.529607		CAMK2A	PLEKHA2	S184	NetworKIN	0.372844
		CAMK2A	CACNB1	S186	NetworKIN	0.328755		CAMK2A	CACNB1	S186	NetworKIN	0.22033		CAMK2A	CACNB1	S186	NetworKIN	0.248328		CAMK2A	CACNB1	S186	NetworKIN	0.0124528
		CAMK2A	MATR3	S188	NetworKIN	0.599357		CAMK2A	MATR3	S188	NetworKIN	0.806054		CAMK2A	MATR3	S188	NetworKIN	-0.039341		CAMK2A	MATR3	S188	NetworKIN	0.593131
		CAMK2A	MATR3	S195	NetworKIN	-0.19274		CAMK2A	MATR3	S195	NetworKIN	0.162767		CAMK2A	MATR3	S195	NetworKIN	-0.0597753		CAMK2A	MATR3	S195	NetworKIN	-0.00157356
		CAMK2A	EIF2S2	S2	NetworKIN	-0.149912		CAMK2A	EIF2S2	S2	NetworKIN	0.0584529		CAMK2A	EIF2S2	S2	NetworKIN	0.108725		CAMK2A	EIF2S2	S2	NetworKIN	0.00290924
		CAMK2A	KHDRBS1	S20	NetworKIN	-0.100007		CAMK2A	KHDRBS1	S20	NetworKIN	0.795914		CAMK2A	KHDRBS1	S20	NetworKIN	-0.0653256		CAMK2A	KHDRBS1	S20	NetworKIN	-0.236142
		CAMK2A	PAK2	S20	NetworKIN	-0.477815		CAMK2A	PAK2	S20	NetworKIN	0.273671		CAMK2A	PAK2	S20	NetworKIN	0.091791		CAMK2A	PAK2	S20	NetworKIN	-0.170021
		CAMK2A	ACTA1	S201	NetworKIN	0.105598		CAMK2A	ACTA1	S201	NetworKIN	-0.211244		CAMK2A	ACTA1	S201	NetworKIN	-0.000799117		CAMK2A	ACTA1	S201	NetworKIN	0.0908211
		CAMK2A	SPAG9	S203	NetworKIN	0.591595		CAMK2A	SPAG9	S203	NetworKIN	1.02222		CAMK2A	SPAG9	S203	NetworKIN	-0.228817		CAMK2A	SPAG9	S203	NetworKIN	0.426945
		CAMK2A	ZNF318	S207	NetworKIN	-0.155081		CAMK2A	ZNF318	S207	NetworKIN	0.842289		CAMK2A	ZNF318	S207	NetworKIN	0.168719		CAMK2A	ZNF318	S207	NetworKIN	0.176076
		CAMK2A	GSK3A	S21	NetworKIN	-0.549143		CAMK2A	GSK3A	S21	NetworKIN	-0.0638136		CAMK2A	GSK3A	S21	NetworKIN	0.423193		CAMK2A	GSK3A	S21	NetworKIN	0.0381005
		CAMK2A	AHNAK	S210	NetworKIN	0.285991		CAMK2A	AHNAK	S210	NetworKIN	0.712626		CAMK2A	AHNAK	S210	NetworKIN	0.104169		CAMK2A	AHNAK	S210	NetworKIN	0.17643
		CAMK2A	LYST	S2105	NetworKIN	-0.168243		CAMK2A	LYST	S2105	NetworKIN	0.713034		CAMK2A	LYST	S2105	NetworKIN	0.0432869		CAMK2A	LYST	S2105	NetworKIN	-0.095587
		CAMK2A	STBD1	S211	NetworKIN	0.277231		CAMK2A	STBD1	S211	NetworKIN	0.658905		CAMK2A	STBD1	S211	NetworKIN	0.241258		CAMK2A	STBD1	S211	NetworKIN	-0.184315
		CAMK2A	TJP1	S212	NetworKIN	0.0490277		CAMK2A	TJP1	S212	NetworKIN	0.4694		CAMK2A	TJP1	S212	NetworKIN	0.202576		CAMK2A	TJP1	S212	NetworKIN	-0.279641
		CAMK2A	ARAF	S214	NetworKIN	0.00338245		CAMK2A	ARAF	S214	NetworKIN	0.12485		CAMK2A	ARAF	S214	NetworKIN	0.165682		CAMK2A	ARAF	S214	NetworKIN	0.0676598
		CAMK2A	JPH1	S216	NetworKIN	-0.367486		CAMK2A	JPH1	S216	NetworKIN	0.0444138		CAMK2A	JPH1	S216	NetworKIN	0.209908		CAMK2A	JPH1	S216	NetworKIN	-0.0839266
		CAMK2A	QDPR	S223	NetworKIN	-0.0996794		CAMK2A	QDPR	S223	NetworKIN	-0.0401568		CAMK2A	QDPR	S223	NetworKIN	0.142118		CAMK2A	QDPR	S223	NetworKIN	0.0805215
		CAMK2A	FAM53C	S232	NetworKIN	0.00669828		CAMK2A	FAM53C	S232	NetworKIN	-0.0407357		CAMK2A	FAM53C	S232	NetworKIN	0.265071		CAMK2A	FAM53C	S232	NetworKIN	0.0553859
		CAMK2A	MYOT	S233	NetworKIN	-0.4707		CAMK2A	MYOT	S233	NetworKIN	-0.505823		CAMK2A	MYOT	S233	NetworKIN	0.108318		CAMK2A	MYOT	S233	NetworKIN	0.0362808
		CAMK2A	TALDO1	S237	NetworKIN	0.0456495		CAMK2A	TALDO1	S237	NetworKIN	0.0570539		CAMK2A	TALDO1	S237	NetworKIN	0.0897204		CAMK2A	TALDO1	S237	NetworKIN	0.0328804
		CAMK2A	OSBP	S238	NetworKIN	-0.0394686		CAMK2A	OSBP	S238	NetworKIN	0.412566		CAMK2A	OSBP	S238	NetworKIN	-0.0445274		CAMK2A	OSBP	S238	NetworKIN	0.0858031
		CAMK2A	SVIL	S238	NetworKIN	0.597902		CAMK2A	SVIL	S238	NetworKIN	0.309912		CAMK2A	SVIL	S238	NetworKIN	0.387675		CAMK2A	SVIL	S238	NetworKIN	0.139947
		CAMK2A	CFL2	S24	NetworKIN	-0.159658		CAMK2A	CFL2	S24	NetworKIN	-0.10492		CAMK2A	CFL2	S24	NetworKIN	0.313797		CAMK2A	CFL2	S24	NetworKIN	-0.177407
		CAMK2A	SH3BP4	S246	NetworKIN	-0.408547		CAMK2A	SH3BP4	S246	NetworKIN	0.292793		CAMK2A	SH3BP4	S246	NetworKIN	0.178207		CAMK2A	SH3BP4	S246	NetworKIN	-0.0363572
		CAMK2A	PPP1R3D	S25	NetworKIN	-0.0500735		CAMK2A	PPP1R3D	S25	NetworKIN	0.327999		CAMK2A	PPP1R3D	S25	NetworKIN	0.155957		CAMK2A	PPP1R3D	S25	NetworKIN	0.0760808
		CAMK2A	CTNND1	S252	NetworKIN	-0.142381		CAMK2A	CTNND1	S252	NetworKIN	-0.204011		CAMK2A	CTNND1	S252	NetworKIN	0.0409315		CAMK2A	CTNND1	S252	NetworKIN	0.0847367
		CAMK2A	FOXO3	S253	NetworKIN	-0.0652574		CAMK2A	FOXO3	S253	NetworKIN	-0.250179		CAMK2A	FOXO3	S253	NetworKIN	0.573233		CAMK2A	FOXO3	S253	NetworKIN	0.244162
		CAMK2A	FOXO1	S256	NetworKIN	-0.417025		CAMK2A	FOXO1	S256	NetworKIN	-0.161306		CAMK2A	FOXO1	S256	NetworKIN	0.339167		CAMK2A	FOXO1	S256	NetworKIN	0.175884
		CAMK2A	LARP7	S258	NetworKIN	-0.0392348		CAMK2A	LARP7	S258	NetworKIN	0.0726833		CAMK2A	LARP7	S258	NetworKIN	0.255761		CAMK2A	LARP7	S258	NetworKIN	-0.596677
		CAMK2A	RAF1	S259	NetworKIN	-0.209507		CAMK2A	RAF1	S259	NetworKIN	0.134276		CAMK2A	RAF1	S259	NetworKIN	0.0495004		CAMK2A	RAF1	S259	NetworKIN	0.0638142
		CAMK2A	SVIL	S263	NetworKIN	0.0226641		CAMK2A	SVIL	S263	NetworKIN	1.06876		CAMK2A	SVIL	S263	NetworKIN	0.589387		CAMK2A	SVIL	S263	NetworKIN	-0.186599
		CAMK2A	PHKB	S27	NetworKIN	-0.196471		CAMK2A	PHKB	S27	NetworKIN	0.402056		CAMK2A	PHKB	S27	NetworKIN	0.302435		CAMK2A	PHKB	S27	NetworKIN	-0.121814
		CAMK2A	IRS1	S270	NetworKIN	-0.202046		CAMK2A	IRS1	S270	NetworKIN	-0.191829		CAMK2A	IRS1	S270	NetworKIN	-0.130835		CAMK2A	IRS1	S270	NetworKIN	0.060301
		CAMK2A	TMX1	S270	NetworKIN	-0.124943		CAMK2A	TMX1	S270	NetworKIN	0.666918		CAMK2A	TMX1	S270	NetworKIN	0.210845		CAMK2A	TMX1	S270	NetworKIN	-0.195146
		CAMK2A	CAMK2D	S276	NetworKIN	-0.306649		CAMK2A	CAMK2D	S276	NetworKIN	-0.197038		CAMK2A	CAMK2D	S276	NetworKIN	-0.0797914		CAMK2A	CAMK2D	S276	NetworKIN	-0.159815
		CAMK2A	ABLIM3	S277	NetworKIN	-0.200543		CAMK2A	ABLIM3	S277	NetworKIN	0.212979		CAMK2A	ABLIM3	S277	NetworKIN	0.239436		CAMK2A	ABLIM3	S277	NetworKIN	0.261346
		CAMK2A	RYR1	S2843	NetworKIN	0.0382651		CAMK2A	RYR1	S2843	NetworKIN	-0.0397729		CAMK2A	RYR1	S2843	NetworKIN	0.2354		CAMK2A	RYR1	S2843	NetworKIN	0.497408
		CAMK2A	VCL	S288	NetworKIN	-0.504292		CAMK2A	VCL	S288	NetworKIN	0.777274		CAMK2A	VCL	S288	NetworKIN	0.15941		CAMK2A	VCL	S288	NetworKIN	0.550138
		CAMK2A	RALBP1	S29	NetworKIN	-0.23029		CAMK2A	RALBP1	S29	NetworKIN	-0.0559788		CAMK2A	RALBP1	S29	NetworKIN	0.113793		CAMK2A	RALBP1	S29	NetworKIN	-0.276344
		CAMK2A	LARP7	S300	NetworKIN	-0.156339		CAMK2A	LARP7	S300	NetworKIN	0.201134		CAMK2A	LARP7	S300	NetworKIN	-0.57176		CAMK2A	LARP7	S300	NetworKIN	-0.394109
		CAMK2A	ZRANB2	S305	NetworKIN	-0.313144		CAMK2A	ZRANB2	S305	NetworKIN	-0.0570354		CAMK2A	ZRANB2	S305	NetworKIN	0.195867		CAMK2A	ZRANB2	S305	NetworKIN	-0.155701
		CAMK2A	BCKDK	S31	NetworKIN	-0.00892275		CAMK2A	BCKDK	S31	NetworKIN	0.00709128		CAMK2A	BCKDK	S31	NetworKIN	0.137387		CAMK2A	BCKDK	S31	NetworKIN	-0.015688
		CAMK2A	ITSN1	S315	NetworKIN	-0.545791		CAMK2A	ITSN1	S315	NetworKIN	-0.0200062		CAMK2A	ITSN1	S315	NetworKIN	0.10188		CAMK2A	ITSN1	S315	NetworKIN	-0.0131988
		CAMK2A	CCNY	S326	NetworKIN	-0.237261		CAMK2A	CCNY	S326	NetworKIN	0.155422		CAMK2A	CCNY	S326	NetworKIN	-0.0345429		CAMK2A	CCNY	S326	NetworKIN	-0.0221388
		CAMK2A	LRRFIP2	S328	NetworKIN	-0.219395		CAMK2A	LRRFIP2	S328	NetworKIN	0.25134		CAMK2A	LRRFIP2	S328	NetworKIN	0.311026		CAMK2A	LRRFIP2	S328	NetworKIN	0.0631652
		CAMK2A	RASIP1	S328	NetworKIN	-0.182841		CAMK2A	RASIP1	S328	NetworKIN	-0.0821491		CAMK2A	RASIP1	S328	NetworKIN	0.24294		CAMK2A	RASIP1	S328	NetworKIN	0.0909277
		CAMK2A	IRS1	S330	NetworKIN	-0.0270253		CAMK2A	IRS1	S330	NetworKIN	0.221561		CAMK2A	IRS1	S330	NetworKIN	-0.141524		CAMK2A	IRS1	S330	NetworKIN	0.330103
		CAMK2A	NDRG2	S332	NetworKIN	-0.526574		CAMK2A	NDRG2	S332	NetworKIN	-0.345824		CAMK2A	NDRG2	S332	NetworKIN	-0.0255165		CAMK2A	NDRG2	S332	NetworKIN	-0.11665
		CAMK2A	MAP4K5	S335	NetworKIN	-0.515361		CAMK2A	MAP4K5	S335	NetworKIN	0.729125		CAMK2A	MAP4K5	S335	NetworKIN	0.368194		CAMK2A	MAP4K5	S335	NetworKIN	0.331945
		CAMK2A	TNS1	S338	NetworKIN	-0.436889		CAMK2A	TNS1	S338	NetworKIN	0.224662		CAMK2A	TNS1	S338	NetworKIN	0.101515		CAMK2A	TNS1	S338	NetworKIN	-0.0245911
		CAMK2A	ARHGDIA	S34	NetworKIN	-0.229601		CAMK2A	ARHGDIA	S34	NetworKIN	0.997827		CAMK2A	ARHGDIA	S34	NetworKIN	0.0886555		CAMK2A	ARHGDIA	S34	NetworKIN	-0.157747
		CAMK2A	IRS1	S341	NetworKIN	-0.0864353		CAMK2A	IRS1	S341	NetworKIN	-0.287902		CAMK2A	IRS1	S341	NetworKIN	0.111322		CAMK2A	IRS1	S341	NetworKIN	-0.0952166
		CAMK2A	TBC1D4	S341	NetworKIN	-0.776788		CAMK2A	TBC1D4	S341	NetworKIN	-0.635231		CAMK2A	TBC1D4	S341	NetworKIN	0.618757		CAMK2A	TBC1D4	S341	NetworKIN	0.357357
		CAMK2A	WDR44	S344	NetworKIN	-0.0911017		CAMK2A	WDR44	S344	NetworKIN	0.394136		CAMK2A	WDR44	S344	NetworKIN	0.171888		CAMK2A	WDR44	S344	NetworKIN	0.0451484
		CAMK2A	CLIP1	S348	NetworKIN	0.00813111		CAMK2A	CLIP1	S348	NetworKIN	0.605414		CAMK2A	CLIP1	S348	NetworKIN	0.683204		CAMK2A	CLIP1	S348	NetworKIN	-0.372141
		CAMK2A	EBAG9	S36	NetworKIN	-0.422586		CAMK2A	EBAG9	S36	NetworKIN	0.0718557		CAMK2A	EBAG9	S36	NetworKIN	0.258707		CAMK2A	EBAG9	S36	NetworKIN	0.0987294
		CAMK2A	DMD	S3623	NetworKIN	-0.198891		CAMK2A	DMD	S3623	NetworKIN	0.378041		CAMK2A	DMD	S3623	NetworKIN	-0.035199		CAMK2A	DMD	S3623	NetworKIN	0.119965
		CAMK2A	PRKCE	S368	NetworKIN	0.326971		CAMK2A	PRKCE	S368	NetworKIN	1.48311		CAMK2A	PRKCE	S368	NetworKIN	0.640517		CAMK2A	PRKCE	S368	NetworKIN	0.191239
		CAMK2A	NUP107	S37	NetworKIN	-0.113072		CAMK2A	NUP107	S37	NetworKIN	0.700341		CAMK2A	NUP107	S37	NetworKIN	0.117119		CAMK2A	NUP107	S37	NetworKIN	0.132865
		CAMK2A	RPS6KA3	S386	NetworKIN	0.127351		CAMK2A	RPS6KA3	S386	NetworKIN	-0.0653226		CAMK2A	RPS6KA3	S386	NetworKIN	0.525839		CAMK2A	RPS6KA3	S386	NetworKIN	0.0785382
		CAMK2A	VIM	S39	NetworKIN	-0.196733		CAMK2A	VIM	S39	NetworKIN	0.750871		CAMK2A	VIM	S39	NetworKIN	0.182388		CAMK2A	VIM	S39	NetworKIN	-0.0635193
		CAMK2A	RAB11FIP5	S395	NetworKIN	0.413851		CAMK2A	RAB11FIP5	S395	NetworKIN	0.751378		CAMK2A	RAB11FIP5	S395	NetworKIN	0.871528		CAMK2A	RAB11FIP5	S395	NetworKIN	0.119181
		CAMK2A	LMNA	S404	NetworKIN	0.230154		CAMK2A	LMNA	S404	NetworKIN	0.598228		CAMK2A	LMNA	S404	NetworKIN	0.090411		CAMK2A	LMNA	S404	NetworKIN	0.30083
		CAMK2A	EIF4B	S406	NetworKIN	0.210231		CAMK2A	EIF4B	S406	NetworKIN	0.213067		CAMK2A	EIF4B	S406	NetworKIN	0.233589		CAMK2A	EIF4B	S406	NetworKIN	0.52935
		CAMK2A	SASH1	S407	NetworKIN	-0.0250153		CAMK2A	SASH1	S407	NetworKIN	0.618337		CAMK2A	SASH1	S407	NetworKIN	0.210081		CAMK2A	SASH1	S407	NetworKIN	-0.0781967
		CAMK2A	ARHGEF12	S41	NetworKIN	-0.140217		CAMK2A	ARHGEF12	S41	NetworKIN	1.00542		CAMK2A	ARHGEF12	S41	NetworKIN	1.03224		CAMK2A	ARHGEF12	S41	NetworKIN	0.0462674
		CAMK2A	CRK	S41	NetworKIN	-0.969545		CAMK2A	CRK	S41	NetworKIN	-0.224398		CAMK2A	CRK	S41	NetworKIN	-0.0408678		CAMK2A	CRK	S41	NetworKIN	0.0296198
		CAMK2A	GOLGA4	S41	NetworKIN	-0.099747		CAMK2A	GOLGA4	S41	NetworKIN	0.327832		CAMK2A	GOLGA4	S41	NetworKIN	0.181275		CAMK2A	GOLGA4	S41	NetworKIN	0.137395
		CAMK2A	ACTR10	S414	NetworKIN	0.0769853		CAMK2A	ACTR10	S414	NetworKIN	0.0827853		CAMK2A	ACTR10	S414	NetworKIN	0.37667		CAMK2A	ACTR10	S414	NetworKIN	0.266435
		CAMK2A	HTT	S417	NetworKIN	-0.278153		CAMK2A	HTT	S417	NetworKIN	-0.0363678		CAMK2A	HTT	S417	NetworKIN	0.661751		CAMK2A	HTT	S417	NetworKIN	0.175984
		CAMK2A	HTT	S419	NetworKIN	-0.189806		CAMK2A	HTT	S419	NetworKIN	0.170238		CAMK2A	HTT	S419	NetworKIN	-0.119449		CAMK2A	HTT	S419	NetworKIN	-0.177909
		CAMK2A	RBM12	S422	NetworKIN	-0.133752		CAMK2A	RBM12	S422	NetworKIN	0.195292		CAMK2A	RBM12	S422	NetworKIN	-0.0136238		CAMK2A	RBM12	S422	NetworKIN	0.147879
		CAMK2A	TNKS1BP1	S429	NetworKIN	-0.337202		CAMK2A	TNKS1BP1	S429	NetworKIN	0.405578		CAMK2A	TNKS1BP1	S429	NetworKIN	0.239864		CAMK2A	TNKS1BP1	S429	NetworKIN	0.00711863
		CAMK2A	EXOC2	S432	NetworKIN	0.0174756		CAMK2A	EXOC2	S432	NetworKIN	0.350124		CAMK2A	EXOC2	S432	NetworKIN	0.0777517		CAMK2A	EXOC2	S432	NetworKIN	-0.0613342
		CAMK2A	TESK1	S437	NetworKIN	-0.205124		CAMK2A	TESK1	S437	NetworKIN	0.0288114		CAMK2A	TESK1	S437	NetworKIN	0.0275463		CAMK2A	TESK1	S437	NetworKIN	-0.104586
		CAMK2A	EPB41L1	S441	NetworKIN	-0.94491		CAMK2A	EPB41L1	S441	NetworKIN	0.0853861		CAMK2A	EPB41L1	S441	NetworKIN	0.193266		CAMK2A	EPB41L1	S441	NetworKIN	0.140796
		CAMK2A	SART1	S448	NetworKIN	0.0864872		CAMK2A	SART1	S448	NetworKIN	0.675988		CAMK2A	SART1	S448	NetworKIN	0.105467		CAMK2A	SART1	S448	NetworKIN	0.353441
		CAMK2A	PDCD4	S457	NetworKIN	0.988134		CAMK2A	PDCD4	S457	NetworKIN	1.01409		CAMK2A	PDCD4	S457	NetworKIN	0.0435367		CAMK2A	PDCD4	S457	NetworKIN	0.25446
		CAMK2A	CD2AP	S458	NetworKIN	-0.461531		CAMK2A	CD2AP	S458	NetworKIN	0.00205792		CAMK2A	CD2AP	S458	NetworKIN	0.142949		CAMK2A	CD2AP	S458	NetworKIN	-0.0302065
		CAMK2A	PFKFB2	S466	NetworKIN	0.0264171		CAMK2A	PFKFB2	S466	NetworKIN	0.129134		CAMK2A	PFKFB2	S466	NetworKIN	0.0175047		CAMK2A	PFKFB2	S466	NetworKIN	0.216271
		CAMK2A	TRIM28	S473	NetworKIN	0.714189		CAMK2A	TRIM28	S473	NetworKIN	1.219		CAMK2A	TRIM28	S473	NetworKIN	0.313871		CAMK2A	TRIM28	S473	NetworKIN	1.14204
		CAMK2A	ARHGAP21	S477	NetworKIN	-0.448011		CAMK2A	ARHGAP21	S477	NetworKIN	0.022152		CAMK2A	ARHGAP21	S477	NetworKIN	0.11667		CAMK2A	ARHGAP21	S477	NetworKIN	-0.012505
		CAMK2A	XRCC6	S477	NetworKIN	-0.161433		CAMK2A	XRCC6	S477	NetworKIN	0.171129		CAMK2A	XRCC6	S477	NetworKIN	-0.0106427		CAMK2A	XRCC6	S477	NetworKIN	0.318139
		CAMK2A	PFKFB2	S483	NetworKIN	-0.226462		CAMK2A	PFKFB2	S483	NetworKIN	0.00807712		CAMK2A	PFKFB2	S483	NetworKIN	0.000705192		CAMK2A	PFKFB2	S483	NetworKIN	0.16562
		CAMK2A	SLC2A4	S488	NetworKIN	-0.216969		CAMK2A	SLC2A4	S488	NetworKIN	0.252813		CAMK2A	SLC2A4	S488	NetworKIN	0.114474		CAMK2A	SLC2A4	S488	NetworKIN	0.033741
		CAMK2A	GPBP1L1	S49	NetworKIN	-0.143084		CAMK2A	GPBP1L1	S49	NetworKIN	-0.0276322		CAMK2A	GPBP1L1	S49	NetworKIN	0.0519567		CAMK2A	GPBP1L1	S49	NetworKIN	0.0225249
		CAMK2A	PRKAA2	S491	NetworKIN	0.711668		CAMK2A	PRKAA2	S491	NetworKIN	0.330242		CAMK2A	PRKAA2	S491	NetworKIN	-0.0565134		CAMK2A	PRKAA2	S491	NetworKIN	-0.399474
		CAMK2A	ABLIM3	S503	NetworKIN	-0.0653698		CAMK2A	ABLIM3	S503	NetworKIN	0.0166645		CAMK2A	ABLIM3	S503	NetworKIN	0.0350573		CAMK2A	ABLIM3	S503	NetworKIN	-0.069325
		CAMK2A	ABLIM3	S504	NetworKIN	-0.148551		CAMK2A	ABLIM3	S504	NetworKIN	-0.00878779		CAMK2A	ABLIM3	S504	NetworKIN	0.049075		CAMK2A	ABLIM3	S504	NetworKIN	-0.00734249
		CAMK2A	TBC1D25	S506	NetworKIN	-0.0987205		CAMK2A	TBC1D25	S506	NetworKIN	0.232678		CAMK2A	TBC1D25	S506	NetworKIN	0.049204		CAMK2A	TBC1D25	S506	NetworKIN	0.0806785
		CAMK2A	EPB41L1	S510	NetworKIN	-0.732374		CAMK2A	EPB41L1	S510	NetworKIN	-0.0330629		CAMK2A	EPB41L1	S510	NetworKIN	-0.052513		CAMK2A	EPB41L1	S510	NetworKIN	0.074323
		CAMK2A	MFAP1	S52	NetworKIN	0.00268242		CAMK2A	MFAP1	S52	NetworKIN	0.385423		CAMK2A	MFAP1	S52	NetworKIN	0.288887		CAMK2A	MFAP1	S52	NetworKIN	0.0271168
		CAMK2A	PEBP1	S52	NetworKIN	-0.213757		CAMK2A	PEBP1	S52	NetworKIN	0.322299		CAMK2A	PEBP1	S52	NetworKIN	0.489625		CAMK2A	PEBP1	S52	NetworKIN	0.165104
		CAMK2A	THRAP3	S53	NetworKIN	-0.00130931		CAMK2A	THRAP3	S53	NetworKIN	-0.478326		CAMK2A	THRAP3	S53	NetworKIN	-0.264496		CAMK2A	THRAP3	S53	NetworKIN	-0.0245493
		CAMK2A	TEX2	S538	NetworKIN	-0.415393		CAMK2A	TEX2	S538	NetworKIN	0.785901		CAMK2A	TEX2	S538	NetworKIN	0.512886		CAMK2A	TEX2	S538	NetworKIN	-0.178563
		CAMK2A	KANK2	S540	NetworKIN	-0.418579		CAMK2A	KANK2	S540	NetworKIN	1.79638		CAMK2A	KANK2	S540	NetworKIN	-0.156739		CAMK2A	KANK2	S540	NetworKIN	-0.356159
		CAMK2A	MAP1B	S541	NetworKIN	-1.10008		CAMK2A	MAP1B	S541	NetworKIN	0.789814		CAMK2A	MAP1B	S541	NetworKIN	0.525507		CAMK2A	MAP1B	S541	NetworKIN	0.526419
		CAMK2A	IRS2	S560	NetworKIN	-0.170712		CAMK2A	IRS2	S560	NetworKIN	0.162723		CAMK2A	IRS2	S560	NetworKIN	0.0504492		CAMK2A	IRS2	S560	NetworKIN	0.277245
		CAMK2A	PHLDB1	S563	NetworKIN	-0.215572		CAMK2A	PHLDB1	S563	NetworKIN	0.0639897		CAMK2A	PHLDB1	S563	NetworKIN	0.0419618		CAMK2A	PHLDB1	S563	NetworKIN	0.00811064
		CAMK2A	THRAP3	S575	NetworKIN	-0.350535		CAMK2A	THRAP3	S575	NetworKIN	0.54518		CAMK2A	THRAP3	S575	NetworKIN	0.0957417		CAMK2A	THRAP3	S575	NetworKIN	-0.0152707
		CAMK2A	AHNAK	S5780	NetworKIN	-0.301504		CAMK2A	AHNAK	S5780	NetworKIN	0.652899		CAMK2A	AHNAK	S5780	NetworKIN	0.0911348		CAMK2A	AHNAK	S5780	NetworKIN	-0.146247
		CAMK2A	AHNAK	S5782	NetworKIN	-0.85589		CAMK2A	AHNAK	S5782	NetworKIN	0.211237		CAMK2A	AHNAK	S5782	NetworKIN	0.140601		CAMK2A	AHNAK	S5782	NetworKIN	-0.210361
		CAMK2A	MTSS1L	S579	NetworKIN	-0.194473		CAMK2A	MTSS1L	S579	NetworKIN	0.65503		CAMK2A	MTSS1L	S579	NetworKIN	0.611691		CAMK2A	MTSS1L	S579	NetworKIN	-0.0486725
		CAMK2A	KLC2	S582	NetworKIN	-0.0767327		CAMK2A	KLC2	S582	NetworKIN	0.32865		CAMK2A	KLC2	S582	NetworKIN	0.145714		CAMK2A	KLC2	S582	NetworKIN	-0.100584
		CAMK2A	TBC1D4	S588	NetworKIN	0.0462341		CAMK2A	TBC1D4	S588	NetworKIN	0.245317		CAMK2A	TBC1D4	S588	NetworKIN	0.16768		CAMK2A	TBC1D4	S588	NetworKIN	0.0320536
		CAMK2A	CRYAB	S59	NetworKIN	0.926314		CAMK2A	CRYAB	S59	NetworKIN	1.30739		CAMK2A	CRYAB	S59	NetworKIN	-0.384713		CAMK2A	CRYAB	S59	NetworKIN	1.62837
		CAMK2A	MATR3	S596	NetworKIN	-0.477697		CAMK2A	MATR3	S596	NetworKIN	0.211322		CAMK2A	MATR3	S596	NetworKIN	0.527872		CAMK2A	MATR3	S596	NetworKIN	-0.00188397
		CAMK2A	CLASP1	S600	NetworKIN	-0.134784		CAMK2A	CLASP1	S600	NetworKIN	0.202894		CAMK2A	CLASP1	S600	NetworKIN	0.135309		CAMK2A	CLASP1	S600	NetworKIN	-0.0439373
		CAMK2A	MINK1	S601	NetworKIN	0.0202803		CAMK2A	MINK1	S601	NetworKIN	0.540196		CAMK2A	MINK1	S601	NetworKIN	-0.0795873		CAMK2A	MINK1	S601	NetworKIN	0.104254
		CAMK2A	MTMR10	S607	NetworKIN	-0.334975		CAMK2A	MTMR10	S607	NetworKIN	0.0797056		CAMK2A	MTMR10	S607	NetworKIN	0.204049		CAMK2A	MTMR10	S607	NetworKIN	-0.483063
		CAMK2A	PRKCDBP	S62	NetworKIN	-0.556251		CAMK2A	PRKCDBP	S62	NetworKIN	0.566314		CAMK2A	PRKCDBP	S62	NetworKIN	0.274797		CAMK2A	PRKCDBP	S62	NetworKIN	0.151471
		CAMK2A	TNS1	S621	NetworKIN	-0.102972		CAMK2A	TNS1	S621	NetworKIN	0.402856		CAMK2A	TNS1	S621	NetworKIN	0.146157		CAMK2A	TNS1	S621	NetworKIN	0.142345
		CAMK2A	TBC1D1	S627	NetworKIN	5.22001e-05		CAMK2A	TBC1D1	S627	NetworKIN	0.085923		CAMK2A	TBC1D1	S627	NetworKIN	-0.122323		CAMK2A	TBC1D1	S627	NetworKIN	-0.182417
		CAMK2A	GIGYF1	S638	NetworKIN	0.18369		CAMK2A	GIGYF1	S638	NetworKIN	0.576856		CAMK2A	GIGYF1	S638	NetworKIN	0.0303661		CAMK2A	GIGYF1	S638	NetworKIN	0.226997
		CAMK2A	ARHGEF6	S640	NetworKIN	0.0708929		CAMK2A	ARHGEF6	S640	NetworKIN	0.76165		CAMK2A	ARHGEF6	S640	NetworKIN	0.268595		CAMK2A	ARHGEF6	S640	NetworKIN	0.0364919
		CAMK2A	ATP5J	S65	NetworKIN	0.0966698		CAMK2A	ATP5J	S65	NetworKIN	-0.0510466		CAMK2A	ATP5J	S65	NetworKIN	-0.110551		CAMK2A	ATP5J	S65	NetworKIN	0.037669
		CAMK2A	C18orf25	S66	NetworKIN	0.20226		CAMK2A	C18orf25	S66	NetworKIN	0.349214		CAMK2A	C18orf25	S66	NetworKIN	0.131883		CAMK2A	C18orf25	S66	NetworKIN	0.377851
		CAMK2A	TBC1D4	S673	NetworKIN	0.413375		CAMK2A	TBC1D4	S673	NetworKIN	-0.0185669		CAMK2A	TBC1D4	S673	NetworKIN	-0.0576211		CAMK2A	TBC1D4	S673	NetworKIN	-0.0986661
		CAMK2A	AGPAT9	S68	NetworKIN	1.31614		CAMK2A	AGPAT9	S68	NetworKIN	0.758173		CAMK2A	AGPAT9	S68	NetworKIN	0.0824952		CAMK2A	AGPAT9	S68	NetworKIN	-0.140703
		CAMK2A	RPL27A	S68	NetworKIN	-0.994357		CAMK2A	RPL27A	S68	NetworKIN	-0.384897		CAMK2A	RPL27A	S68	NetworKIN	-0.00157013		CAMK2A	RPL27A	S68	NetworKIN	-0.403079
		CAMK2A	EPB41L2	S682	NetworKIN	-0.622691		CAMK2A	EPB41L2	S682	NetworKIN	-0.0134336		CAMK2A	EPB41L2	S682	NetworKIN	0.373214		CAMK2A	EPB41L2	S682	NetworKIN	-0.0311727
		CAMK2A	PHKB	S701	NetworKIN	-0.0637767		CAMK2A	PHKB	S701	NetworKIN	0.195929		CAMK2A	PHKB	S701	NetworKIN	0.205574		CAMK2A	PHKB	S701	NetworKIN	0.48382
		CAMK2A	TNS1	S701	NetworKIN	-0.129597		CAMK2A	TNS1	S701	NetworKIN	0.310395		CAMK2A	TNS1	S701	NetworKIN	0.195686		CAMK2A	TNS1	S701	NetworKIN	0.147504
		CAMK2A	SRRM1	S705	NetworKIN	-0.00284531		CAMK2A	SRRM1	S705	NetworKIN	0.0221929		CAMK2A	SRRM1	S705	NetworKIN	0.00205155		CAMK2A	SRRM1	S705	NetworKIN	-0.048394
		CAMK2A	SVIL	S707	NetworKIN	-0.411923		CAMK2A	SVIL	S707	NetworKIN	0.249812		CAMK2A	SVIL	S707	NetworKIN	0.1719		CAMK2A	SVIL	S707	NetworKIN	-0.38901
		CAMK2A	TRAPPC10	S708	NetworKIN	-0.120774		CAMK2A	TRAPPC10	S708	NetworKIN	0.334803		CAMK2A	TRAPPC10	S708	NetworKIN	0.13598		CAMK2A	TRAPPC10	S708	NetworKIN	0.105807
		CAMK2A	VIM	S72	NetworKIN	-0.772996		CAMK2A	VIM	S72	NetworKIN	0.257668		CAMK2A	VIM	S72	NetworKIN	-0.10468		CAMK2A	VIM	S72	NetworKIN	0.294279
		CAMK2A	BRAF	S729	NetworKIN	-0.157515		CAMK2A	BRAF	S729	NetworKIN	-0.0881678		CAMK2A	BRAF	S729	NetworKIN	-0.0611345		CAMK2A	BRAF	S729	NetworKIN	-0.334362
		CAMK2A	PPP1R3D	S74	NetworKIN	-0.197319		CAMK2A	PPP1R3D	S74	NetworKIN	-0.068637		CAMK2A	PPP1R3D	S74	NetworKIN	-0.104662		CAMK2A	PPP1R3D	S74	NetworKIN	-0.228887
		CAMK2A	WRNIP1	S75	NetworKIN	0.339269		CAMK2A	WRNIP1	S75	NetworKIN	0.791185		CAMK2A	WRNIP1	S75	NetworKIN	0.267604		CAMK2A	WRNIP1	S75	NetworKIN	0.337849
		CAMK2A	TBC1D4	S751	NetworKIN	0.0114425		CAMK2A	TBC1D4	S751	NetworKIN	-0.157216		CAMK2A	TBC1D4	S751	NetworKIN	0.344072		CAMK2A	TBC1D4	S751	NetworKIN	0.0455869
		CAMK2A	MYPN	S759	NetworKIN	0.469476		CAMK2A	MYPN	S759	NetworKIN	0.0986674		CAMK2A	MYPN	S759	NetworKIN	0.561959		CAMK2A	MYPN	S759	NetworKIN	0.0245137
		CAMK2A	ATP5A1	S76	NetworKIN	-0.168198		CAMK2A	ATP5A1	S76	NetworKIN	0.0468068		CAMK2A	ATP5A1	S76	NetworKIN	0.168113		CAMK2A	ATP5A1	S76	NetworKIN	0.0467741
		CAMK2A	NES	S768	NetworKIN	-0.0594651		CAMK2A	NES	S768	NetworKIN	0.405961		CAMK2A	NES	S768	NetworKIN	0.357167		CAMK2A	NES	S768	NetworKIN	-0.172988
		CAMK2A	TNS3	S776	NetworKIN	-0.0891327		CAMK2A	TNS3	S776	NetworKIN	0.826093		CAMK2A	TNS3	S776	NetworKIN	-0.0348275		CAMK2A	TNS3	S776	NetworKIN	-0.12575
		CAMK2A	FAM195A	S78	NetworKIN	0.233423		CAMK2A	FAM195A	S78	NetworKIN	0.672456		CAMK2A	FAM195A	S78	NetworKIN	0.153948		CAMK2A	FAM195A	S78	NetworKIN	0.333339
		CAMK2A	CLASP1	S797	NetworKIN	-0.546852		CAMK2A	CLASP1	S797	NetworKIN	0.110213		CAMK2A	CLASP1	S797	NetworKIN	0.280086		CAMK2A	CLASP1	S797	NetworKIN	0.0709818
		CAMK2A	MAP2K4	S80	NetworKIN	0.0993864		CAMK2A	MAP2K4	S80	NetworKIN	1.3882		CAMK2A	MAP2K4	S80	NetworKIN	0.226514		CAMK2A	MAP2K4	S80	NetworKIN	0.180813
		CAMK2A	HSPB1	S82	NetworKIN	0.883518		CAMK2A	HSPB1	S82	NetworKIN	1.25016		CAMK2A	HSPB1	S82	NetworKIN	-0.267891		CAMK2A	HSPB1	S82	NetworKIN	1.14434
		CAMK2A	CWC22	S829	NetworKIN	-0.266738		CAMK2A	CWC22	S829	NetworKIN	0.210523		CAMK2A	CWC22	S829	NetworKIN	0.143703		CAMK2A	CWC22	S829	NetworKIN	-0.014069
		CAMK2A	GAPDH	S83	NetworKIN	-0.341329		CAMK2A	GAPDH	S83	NetworKIN	-0.0671924		CAMK2A	GAPDH	S83	NetworKIN	0.130685		CAMK2A	GAPDH	S83	NetworKIN	-0.0366405
		CAMK2A	SASH1	S839	NetworKIN	-0.0617366		CAMK2A	SASH1	S839	NetworKIN	1.18561		CAMK2A	SASH1	S839	NetworKIN	0.160084		CAMK2A	SASH1	S839	NetworKIN	0.0266996
		CAMK2A	NCK1	S85	NetworKIN	0.147193		CAMK2A	NCK1	S85	NetworKIN	0.570691		CAMK2A	NCK1	S85	NetworKIN	0.231727		CAMK2A	NCK1	S85	NetworKIN	0.00109545
		CAMK2A	SRRM2	S854	NetworKIN	-0.234153		CAMK2A	SRRM2	S854	NetworKIN	-0.0878313		CAMK2A	SRRM2	S854	NetworKIN	-0.0227258		CAMK2A	SRRM2	S854	NetworKIN	-0.166946
		CAMK2A	LIPE	S855	NetworKIN	-0.883762		CAMK2A	LIPE	S855	NetworKIN	0.162042		CAMK2A	LIPE	S855	NetworKIN	0.148686		CAMK2A	LIPE	S855	NetworKIN	0.023254
		CAMK2A	ARHGAP21	S857	NetworKIN	-0.231388		CAMK2A	ARHGAP21	S857	NetworKIN	0.0861655		CAMK2A	ARHGAP21	S857	NetworKIN	-0.11724		CAMK2A	ARHGAP21	S857	NetworKIN	-0.0131284
		CAMK2A	EMD	S87	NetworKIN	-0.252648		CAMK2A	EMD	S87	NetworKIN	0.578563		CAMK2A	EMD	S87	NetworKIN	-0.0962907		CAMK2A	EMD	S87	NetworKIN	0.0804984
		CAMK2A	EPB41L2	S87	NetworKIN	-0.481117		CAMK2A	EPB41L2	S87	NetworKIN	0.332642		CAMK2A	EPB41L2	S87	NetworKIN	-0.00195588		CAMK2A	EPB41L2	S87	NetworKIN	0.0543728
		CAMK2A	ARHGAP21	S881	NetworKIN	-0.558499		CAMK2A	ARHGAP21	S881	NetworKIN	0.277897		CAMK2A	ARHGAP21	S881	NetworKIN	0.263187		CAMK2A	ARHGAP21	S881	NetworKIN	0.133648
		CAMK2A	CTNND1	S899	NetworKIN	-0.37998		CAMK2A	CTNND1	S899	NetworKIN	-0.266413		CAMK2A	CTNND1	S899	NetworKIN	0.048055		CAMK2A	CTNND1	S899	NetworKIN	-0.222407
		CAMK2A	TNS1	S899	NetworKIN	0.261606		CAMK2A	TNS1	S899	NetworKIN	0.240631		CAMK2A	TNS1	S899	NetworKIN	0.205066		CAMK2A	TNS1	S899	NetworKIN	0.104694
		CAMK2A	SASH1	S90	NetworKIN	-0.116003		CAMK2A	SASH1	S90	NetworKIN	0.586287		CAMK2A	SASH1	S90	NetworKIN	0.175232		CAMK2A	SASH1	S90	NetworKIN	-0.23034
		CAMK2A	TSC2	S939	NetworKIN	-0.179627		CAMK2A	TSC2	S939	NetworKIN	-0.197138		CAMK2A	TSC2	S939	NetworKIN	-0.00135892		CAMK2A	TSC2	S939	NetworKIN	-0.0365394
		CAMK2A	IQSEC1	S940	NetworKIN	-0.36476		CAMK2A	IQSEC1	S940	NetworKIN	0.203173		CAMK2A	IQSEC1	S940	NetworKIN	0.106506		CAMK2A	IQSEC1	S940	NetworKIN	0.056377
		CAMK2A	ARHGAP29	S949	NetworKIN	-0.135891		CAMK2A	ARHGAP29	S949	NetworKIN	0.20842		CAMK2A	ARHGAP29	S949	NetworKIN	0.155722		CAMK2A	ARHGAP29	S949	NetworKIN	0.107883
		CAMK2A	LBR	S99	NetworKIN	-0.499213		CAMK2A	LBR	S99	NetworKIN	0.401492		CAMK2A	LBR	S99	NetworKIN	0.262631		CAMK2A	LBR	S99	NetworKIN	0.129055
		CAMK2A	PRKAR2A	S99	NetworKIN	-0.0930411		CAMK2A	PRKAR2A	S99	NetworKIN	-0.0209813		CAMK2A	PRKAR2A	S99	NetworKIN	-0.0103187		CAMK2A	PRKAR2A	S99	NetworKIN	-0.0161239
		CAMK2A	GBF1	T1317	NetworKIN	-0.19708		CAMK2A	GBF1	T1317	NetworKIN	-0.330939		CAMK2A	GBF1	T1317	NetworKIN	0.312305		CAMK2A	GBF1	T1317	NetworKIN	-0.183164
		CAMK2A	TSC2	T1462	NetworKIN	0.0392118		CAMK2A	TSC2	T1462	NetworKIN	0.223093		CAMK2A	TSC2	T1462	NetworKIN	0.100408		CAMK2A	TSC2	T1462	NetworKIN	-0.0246047
		CAMK2A	TPM3	T253	NetworKIN	-0.00567383		CAMK2A	TPM3	T253	NetworKIN	0.305148		CAMK2A	TPM3	T253	NetworKIN	0.210938		CAMK2A	TPM3	T253	NetworKIN	0.0625842
		CAMK2A	CAMK2B	T254	NetworKIN	-0.879206		CAMK2A	CAMK2B	T254	NetworKIN	-0.074599		CAMK2A	CAMK2B	T254	NetworKIN	0.366121		CAMK2A	CAMK2B	T254	NetworKIN	-0.319747
		CAMK2A	CAMK2B	T287	NetworKIN	-0.267764		CAMK2A	CAMK2B	T287	NetworKIN	-0.159508		CAMK2A	CAMK2B	T287	NetworKIN	0.0600786		CAMK2A	CAMK2B	T287	NetworKIN	-0.279602
		CAMK2A	CAMK2D	T287	NetworKIN	-0.43146		CAMK2A	CAMK2D	T287	NetworKIN	-0.108585		CAMK2A	CAMK2D	T287	NetworKIN	0.182799		CAMK2A	CAMK2D	T287	NetworKIN	-0.321167
		CAMK2A	CAMK2B	T382	NetworKIN	-0.0504069		CAMK2A	CAMK2B	T382	NetworKIN	0.155978		CAMK2A	CAMK2B	T382	NetworKIN	0.205695		CAMK2A	CAMK2B	T382	NetworKIN	-0.0566949
		CAMK2A	IRS1	T446	NetworKIN	-0.259285		CAMK2A	IRS1	T446	NetworKIN	-0.069643		CAMK2A	IRS1	T446	NetworKIN	-0.0732817		CAMK2A	IRS1	T446	NetworKIN	-0.00385424
		CAMK2A	VIM	T48	NetworKIN	-0.384247		CAMK2A	VIM	T48	NetworKIN	0.645736		CAMK2A	VIM	T48	NetworKIN	0.147022		CAMK2A	VIM	T48	NetworKIN	0.173799
		CAMK2A	UBXN4	T489	NetworKIN	0.100598		CAMK2A	UBXN4	T489	NetworKIN	0.681064		CAMK2A	UBXN4	T489	NetworKIN	0.0410407		CAMK2A	UBXN4	T489	NetworKIN	0.178887
		CAMK2A	CACNB1	T499	NetworKIN	-0.258062		CAMK2A	CACNB1	T499	NetworKIN	0.0928346		CAMK2A	CACNB1	T499	NetworKIN	0.522344		CAMK2A	CACNB1	T499	NetworKIN	0.0261559
		CAMK2A	TBC1D4	T642	NetworKIN	-0.0579316		CAMK2A	TBC1D4	T642	NetworKIN	-0.353735		CAMK2A	TBC1D4	T642	NetworKIN	0.149074		CAMK2A	TBC1D4	T642	NetworKIN	0.313352
		CAMK2A	CTNNA1	T654	NetworKIN	0.084922		CAMK2A	CTNNA1	T654	NetworKIN	0.0493183		CAMK2A	CTNNA1	T654	NetworKIN	0.0908943		CAMK2A	CTNNA1	T654	NetworKIN	-0.0317831
		CAMK2A	DAG1	T790	NetworKIN	-0.32009		CAMK2A	DAG1	T790	NetworKIN	0.299652		CAMK2A	DAG1	T790	NetworKIN	0.20142		CAMK2A	DAG1	T790	NetworKIN	-0.120034
		CAMK2B	PPP1R9B	S100	NetworKIN	-0.48468		CAMK2B	PPP1R9B	S100	NetworKIN	0.409231		CAMK2B	PPP1R9B	S100	NetworKIN	-0.0241021		CAMK2B	PPP1R9B	S100	NetworKIN	0.141376
		CAMK2B	GAPDH	S148	NetworKIN	-0.403012		CAMK2B	GAPDH	S148	NetworKIN	-0.610898		CAMK2B	GAPDH	S148	NetworKIN	-0.124703		CAMK2B	GAPDH	S148	NetworKIN	-0.209602
		CAMK2B	HDAC4	S210	NetworKIN	-0.363097		CAMK2B	HDAC4	S210	NetworKIN	0.406476		CAMK2B	HDAC4	S210	NetworKIN	0.273035		CAMK2B	HDAC4	S210	NetworKIN	-0.138032
		CAMK2B	CAMK2D	S276	NetworKIN	-0.306649		CAMK2B	CAMK2D	S276	NetworKIN	-0.197038		CAMK2B	CAMK2D	S276	NetworKIN	-0.0797914		CAMK2B	CAMK2D	S276	NetworKIN	-0.159815
		CAMK2B	CAMK2D	S280	NetworKIN	-0.450589		CAMK2B	CAMK2D	S280	NetworKIN	-0.001264		CAMK2B	CAMK2D	S280	NetworKIN	-0.11103		CAMK2B	CAMK2D	S280	NetworKIN	0.0656312
		CAMK2B	RYR1	S2843	NetworKIN	0.0382651		CAMK2B	RYR1	S2843	NetworKIN	-0.0397729		CAMK2B	RYR1	S2843	NetworKIN	0.2354		CAMK2B	RYR1	S2843	NetworKIN	0.497408
		CAMK2B	DMD	S3623	NetworKIN	-0.198891		CAMK2B	DMD	S3623	NetworKIN	0.378041		CAMK2B	DMD	S3623	NetworKIN	-0.035199		CAMK2B	DMD	S3623	NetworKIN	0.119965
		CAMK2B	CAMK2B	S367	NetworKIN	0.669315		CAMK2B	CAMK2B	S367	NetworKIN	0.964214		CAMK2B	CAMK2B	S367	NetworKIN	0.279568		CAMK2B	CAMK2B	S367	NetworKIN	2.45751
		CAMK2B	VIM	S39	NetworKIN	-0.196733		CAMK2B	VIM	S39	NetworKIN	0.750871		CAMK2B	VIM	S39	NetworKIN	0.182388		CAMK2B	VIM	S39	NetworKIN	-0.0635193
		CAMK2B	CAMK2B	S397	NetworKIN	-0.166574		CAMK2B	CAMK2B	S397	NetworKIN	0.268789		CAMK2B	CAMK2B	S397	NetworKIN	0.0803756		CAMK2B	CAMK2B	S397	NetworKIN	-0.739609
		CAMK2B	EPB41L1	S441	NetworKIN	-0.94491		CAMK2B	EPB41L1	S441	NetworKIN	0.0853861		CAMK2B	EPB41L1	S441	NetworKIN	0.193266		CAMK2B	EPB41L1	S441	NetworKIN	0.140796
		CAMK2B	HDAC4	S467	NetworKIN	-0.210882		CAMK2B	HDAC4	S467	NetworKIN	0.581791		CAMK2B	HDAC4	S467	NetworKIN	0.405821		CAMK2B	HDAC4	S467	NetworKIN	-0.162936
		CAMK2B	VIM	S47	NetworKIN	-0.452957		CAMK2B	VIM	S47	NetworKIN	0.356683		CAMK2B	VIM	S47	NetworKIN	0.169109		CAMK2B	VIM	S47	NetworKIN	-0.132172
		CAMK2B	NEFL	S472	NetworKIN	-0.230856		CAMK2B	NEFL	S472	NetworKIN	0.98924		CAMK2B	NEFL	S472	NetworKIN	0.778308		CAMK2B	NEFL	S472	NetworKIN	0.00152455
		CAMK2B	SLC2A4	S488	NetworKIN	-0.216969		CAMK2B	SLC2A4	S488	NetworKIN	0.252813		CAMK2B	SLC2A4	S488	NetworKIN	0.114474		CAMK2B	SLC2A4	S488	NetworKIN	0.033741
		CAMK2B	EPB41L1	S510	NetworKIN	-0.732374		CAMK2B	EPB41L1	S510	NetworKIN	-0.0330629		CAMK2B	EPB41L1	S510	NetworKIN	-0.052513		CAMK2B	EPB41L1	S510	NetworKIN	0.074323
		CAMK2B	HDAC4	S632	NetworKIN	-0.373879		CAMK2B	HDAC4	S632	NetworKIN	0.633305		CAMK2B	HDAC4	S632	NetworKIN	0.53748		CAMK2B	HDAC4	S632	NetworKIN	-0.305869
		CAMK2B	VIM	S72	NetworKIN	-0.772996		CAMK2B	VIM	S72	NetworKIN	0.257668		CAMK2B	VIM	S72	NetworKIN	-0.10468		CAMK2B	VIM	S72	NetworKIN	0.294279
		CAMK2B	GAPDH	S83	NetworKIN	-0.341329		CAMK2B	GAPDH	S83	NetworKIN	-0.0671924		CAMK2B	GAPDH	S83	NetworKIN	0.130685		CAMK2B	GAPDH	S83	NetworKIN	-0.0366405
		CAMK2B	PRKAR2A	S99	NetworKIN	-0.0930411		CAMK2B	PRKAR2A	S99	NetworKIN	-0.0209813		CAMK2B	PRKAR2A	S99	NetworKIN	-0.0103187		CAMK2B	PRKAR2A	S99	NetworKIN	-0.0161239
		CAMK2B	CAMK2B	T254	NetworKIN	-0.879206		CAMK2B	CAMK2B	T254	NetworKIN	-0.074599		CAMK2B	CAMK2B	T254	NetworKIN	0.366121		CAMK2B	CAMK2B	T254	NetworKIN	-0.319747
		CAMK2B	CAMK2B	T287	NetworKIN	-0.267764		CAMK2B	CAMK2B	T287	NetworKIN	-0.159508		CAMK2B	CAMK2B	T287	NetworKIN	0.0600786		CAMK2B	CAMK2B	T287	NetworKIN	-0.279602
		CAMK2B	CAMK2D	T287	NetworKIN	-0.43146		CAMK2B	CAMK2D	T287	NetworKIN	-0.108585		CAMK2B	CAMK2D	T287	NetworKIN	0.182799		CAMK2B	CAMK2D	T287	NetworKIN	-0.321167
		CAMK2B	CAMK2D	T306	NetworKIN	0.215898		CAMK2B	CAMK2D	T306	NetworKIN	0.210011		CAMK2B	CAMK2D	T306	NetworKIN	0.0687733		CAMK2B	CAMK2D	T306	NetworKIN	0.0784329
		CAMK2B	CAMK2B	T366	NetworKIN	0.572024		CAMK2B	CAMK2B	T366	NetworKIN	0.641335		CAMK2B	CAMK2B	T366	NetworKIN	0.251736		CAMK2B	CAMK2B	T366	NetworKIN	2.11882
		CAMK2B	CAMK2B	T371	NetworKIN	-0.261706		CAMK2B	CAMK2B	T371	NetworKIN	0.101328		CAMK2B	CAMK2B	T371	NetworKIN	0.179021		CAMK2B	CAMK2B	T371	NetworKIN	-0.100347
		CAMK2B	CAMK2B	T381	NetworKIN	-0.143447		CAMK2B	CAMK2B	T381	NetworKIN	0.419645		CAMK2B	CAMK2B	T381	NetworKIN	0.484393		CAMK2B	CAMK2B	T381	NetworKIN	0.188785
		CAMK2B	CAMK2B	T382	NetworKIN	-0.0504069		CAMK2B	CAMK2B	T382	NetworKIN	0.155978		CAMK2B	CAMK2B	T382	NetworKIN	0.205695		CAMK2B	CAMK2B	T382	NetworKIN	-0.0566949
		CAMK2B	CAMK2B	T400	NetworKIN	-0.237087		CAMK2B	CAMK2B	T400	NetworKIN	0.230772		CAMK2B	CAMK2B	T400	NetworKIN	0.397914		CAMK2B	CAMK2B	T400	NetworKIN	-0.176592
		CAMK2B	VIM	T48	NetworKIN	-0.384247		CAMK2B	VIM	T48	NetworKIN	0.645736		CAMK2B	VIM	T48	NetworKIN	0.147022		CAMK2B	VIM	T48	NetworKIN	0.173799
		CAMK2D	CKB	S163	NetworKIN	-0.203197		CAMK2D	CKB	S163	NetworKIN	-0.0266167		CAMK2D	CKB	S163	NetworKIN	0.293155		CAMK2D	CKB	S163	NetworKIN	-0.017729
		CAMK2D	CKB	S178	NetworKIN	-0.204237		CAMK2D	CKB	S178	NetworKIN	0.395192		CAMK2D	CKB	S178	NetworKIN	0.551751		CAMK2D	CKB	S178	NetworKIN	0.0203519
		CAMK2D	CAMK2D	S276	NetworKIN	-0.306649		CAMK2D	CAMK2D	S276	NetworKIN	-0.197038		CAMK2D	CAMK2D	S276	NetworKIN	-0.0797914		CAMK2D	CAMK2D	S276	NetworKIN	-0.159815
		CAMK2D	CAMK2D	S280	NetworKIN	-0.450589		CAMK2D	CAMK2D	S280	NetworKIN	-0.001264		CAMK2D	CAMK2D	S280	NetworKIN	-0.11103		CAMK2D	CAMK2D	S280	NetworKIN	0.0656312
		CAMK2D	RYR1	S2843	NetworKIN	0.0382651		CAMK2D	RYR1	S2843	NetworKIN	-0.0397729		CAMK2D	RYR1	S2843	NetworKIN	0.2354		CAMK2D	RYR1	S2843	NetworKIN	0.497408
		CAMK2D	CAMK2D	S333	NetworKIN	-0.560425		CAMK2D	CAMK2D	S333	NetworKIN	-0.211429		CAMK2D	CAMK2D	S333	NetworKIN	0.338293		CAMK2D	CAMK2D	S333	NetworKIN	-0.229111
		CAMK2D	EIF4B	S359	NetworKIN	-0.143805		CAMK2D	EIF4B	S359	NetworKIN	0.493161		CAMK2D	EIF4B	S359	NetworKIN	0.170633		CAMK2D	EIF4B	S359	NetworKIN	-0.0342649
		CAMK2D	DMD	S3623	NetworKIN	-0.198891		CAMK2D	DMD	S3623	NetworKIN	0.378041		CAMK2D	DMD	S3623	NetworKIN	-0.035199		CAMK2D	DMD	S3623	NetworKIN	0.119965
		CAMK2D	VIM	S39	NetworKIN	-0.196733		CAMK2D	VIM	S39	NetworKIN	0.750871		CAMK2D	VIM	S39	NetworKIN	0.182388		CAMK2D	VIM	S39	NetworKIN	-0.0635193
		CAMK2D	EIF4B	S406	NetworKIN	0.210231		CAMK2D	EIF4B	S406	NetworKIN	0.213067		CAMK2D	EIF4B	S406	NetworKIN	0.233589		CAMK2D	EIF4B	S406	NetworKIN	0.52935
		CAMK2D	EPB41L1	S441	NetworKIN	-0.94491		CAMK2D	EPB41L1	S441	NetworKIN	0.0853861		CAMK2D	EPB41L1	S441	NetworKIN	0.193266		CAMK2D	EPB41L1	S441	NetworKIN	0.140796
		CAMK2D	HDAC4	S467	NetworKIN	-0.210882		CAMK2D	HDAC4	S467	NetworKIN	0.581791		CAMK2D	HDAC4	S467	NetworKIN	0.405821		CAMK2D	HDAC4	S467	NetworKIN	-0.162936
		CAMK2D	VIM	S47	NetworKIN	-0.452957		CAMK2D	VIM	S47	NetworKIN	0.356683		CAMK2D	VIM	S47	NetworKIN	0.169109		CAMK2D	VIM	S47	NetworKIN	-0.132172
		CAMK2D	NEFL	S472	NetworKIN	-0.230856		CAMK2D	NEFL	S472	NetworKIN	0.98924		CAMK2D	NEFL	S472	NetworKIN	0.778308		CAMK2D	NEFL	S472	NetworKIN	0.00152455
		CAMK2D	FXR1	S494	NetworKIN	-0.160562		CAMK2D	FXR1	S494	NetworKIN	0.130188		CAMK2D	FXR1	S494	NetworKIN	0.225358		CAMK2D	FXR1	S494	NetworKIN	0.161338
		CAMK2D	EPB41L1	S510	NetworKIN	-0.732374		CAMK2D	EPB41L1	S510	NetworKIN	-0.0330629		CAMK2D	EPB41L1	S510	NetworKIN	-0.052513		CAMK2D	EPB41L1	S510	NetworKIN	0.074323
		CAMK2D	HDAC4	S632	NetworKIN	-0.373879		CAMK2D	HDAC4	S632	NetworKIN	0.633305		CAMK2D	HDAC4	S632	NetworKIN	0.53748		CAMK2D	HDAC4	S632	NetworKIN	-0.305869
		CAMK2D	VIM	S72	NetworKIN	-0.772996		CAMK2D	VIM	S72	NetworKIN	0.257668		CAMK2D	VIM	S72	NetworKIN	-0.10468		CAMK2D	VIM	S72	NetworKIN	0.294279
		CAMK2D	CAMK2B	T254	NetworKIN	-0.879206		CAMK2D	CAMK2B	T254	NetworKIN	-0.074599		CAMK2D	CAMK2B	T254	NetworKIN	0.366121		CAMK2D	CAMK2B	T254	NetworKIN	-0.319747
		CAMK2D	CAMK2B	T287	NetworKIN	-0.267764		CAMK2D	CAMK2B	T287	NetworKIN	-0.159508		CAMK2D	CAMK2B	T287	NetworKIN	0.0600786		CAMK2D	CAMK2B	T287	NetworKIN	-0.279602
		CAMK2D	CAMK2D	T287	NetworKIN	-0.43146		CAMK2D	CAMK2D	T287	NetworKIN	-0.108585		CAMK2D	CAMK2D	T287	NetworKIN	0.182799		CAMK2D	CAMK2D	T287	NetworKIN	-0.321167
		CAMK2D	CAMK2D	T306	NetworKIN	0.215898		CAMK2D	CAMK2D	T306	NetworKIN	0.210011		CAMK2D	CAMK2D	T306	NetworKIN	0.0687733		CAMK2D	CAMK2D	T306	NetworKIN	0.0784329
		CAMK2D	CAMK2D	T307	NetworKIN	-0.0448173		CAMK2D	CAMK2D	T307	NetworKIN	0.330909		CAMK2D	CAMK2D	T307	NetworKIN	0.179988		CAMK2D	CAMK2D	T307	NetworKIN	0.13051
		CAMK2D	CAMK2D	T336	NetworKIN	-0.362752		CAMK2D	CAMK2D	T336	NetworKIN	0.179348		CAMK2D	CAMK2D	T336	NetworKIN	0.253256		CAMK2D	CAMK2D	T336	NetworKIN	-0.241091
		CAMK2D	CAMK2B	T382	NetworKIN	-0.0504069		CAMK2D	CAMK2B	T382	NetworKIN	0.155978		CAMK2D	CAMK2B	T382	NetworKIN	0.205695		CAMK2D	CAMK2B	T382	NetworKIN	-0.0566949
		CAMK2D	CAMK2B	T400	NetworKIN	-0.237087		CAMK2D	CAMK2B	T400	NetworKIN	0.230772		CAMK2D	CAMK2B	T400	NetworKIN	0.397914		CAMK2D	CAMK2B	T400	NetworKIN	-0.176592
		CAMK2D	VIM	T48	NetworKIN	-0.384247		CAMK2D	VIM	T48	NetworKIN	0.645736		CAMK2D	VIM	T48	NetworKIN	0.147022		CAMK2D	VIM	T48	NetworKIN	0.173799
		CAMK2G	EGFR	S1166	NetworKIN	-0.742695		CAMK2G	EGFR	S1166	NetworKIN	0.181343		CAMK2G	EGFR	S1166	NetworKIN	0.0455547		CAMK2G	EGFR	S1166	NetworKIN	-0.0388756
		CAMK2G	CAMK2D	S276	NetworKIN	-0.306649		CAMK2G	CAMK2D	S276	NetworKIN	-0.197038		CAMK2G	CAMK2D	S276	NetworKIN	-0.0797914		CAMK2G	CAMK2D	S276	NetworKIN	-0.159815
		CAMK2G	CAMK2D	S280	NetworKIN	-0.450589		CAMK2G	CAMK2D	S280	NetworKIN	-0.001264		CAMK2G	CAMK2D	S280	NetworKIN	-0.11103		CAMK2G	CAMK2D	S280	NetworKIN	0.0656312
		CAMK2G	RYR1	S2843	NetworKIN	0.0382651		CAMK2G	RYR1	S2843	NetworKIN	-0.0397729		CAMK2G	RYR1	S2843	NetworKIN	0.2354		CAMK2G	RYR1	S2843	NetworKIN	0.497408
		CAMK2G	RRAD	S301	NetworKIN	-0.314325		CAMK2G	RRAD	S301	NetworKIN	-0.0397488		CAMK2G	RRAD	S301	NetworKIN	-0.165484		CAMK2G	RRAD	S301	NetworKIN	0.00976917
		CAMK2G	DMD	S3623	NetworKIN	-0.198891		CAMK2G	DMD	S3623	NetworKIN	0.378041		CAMK2G	DMD	S3623	NetworKIN	-0.035199		CAMK2G	DMD	S3623	NetworKIN	0.119965
		CAMK2G	NEFL	S472	NetworKIN	-0.230856		CAMK2G	NEFL	S472	NetworKIN	0.98924		CAMK2G	NEFL	S472	NetworKIN	0.778308		CAMK2G	NEFL	S472	NetworKIN	0.00152455
		CAMK2G	HDAC4	S632	NetworKIN	-0.373879		CAMK2G	HDAC4	S632	NetworKIN	0.633305		CAMK2G	HDAC4	S632	NetworKIN	0.53748		CAMK2G	HDAC4	S632	NetworKIN	-0.305869
		CAMK2G	PRKAR2A	S99	NetworKIN	-0.0930411		CAMK2G	PRKAR2A	S99	NetworKIN	-0.0209813		CAMK2G	PRKAR2A	S99	NetworKIN	-0.0103187		CAMK2G	PRKAR2A	S99	NetworKIN	-0.0161239
		CAMK2G	CAMK2D	T287	NetworKIN	-0.43146		CAMK2G	CAMK2D	T287	NetworKIN	-0.108585		CAMK2G	CAMK2D	T287	NetworKIN	0.182799		CAMK2G	CAMK2D	T287	NetworKIN	-0.321167
		CAMK2G	CAMK2D	T306	NetworKIN	0.215898		CAMK2G	CAMK2D	T306	NetworKIN	0.210011		CAMK2G	CAMK2D	T306	NetworKIN	0.0687733		CAMK2G	CAMK2D	T306	NetworKIN	0.0784329
		CAMK4	PURB	S100	NetworKIN	-0.063035		CAMK4	PURB	S100	NetworKIN	0.344744		CAMK4	PURB	S100	NetworKIN	0.122944		CAMK4	PURB	S100	NetworKIN	0.294577
		CAMK4	PHKA1	S1018	NetworKIN	0.097129		CAMK4	PHKA1	S1018	NetworKIN	0.0186101		CAMK4	PHKA1	S1018	NetworKIN	0.105809		CAMK4	PHKA1	S1018	NetworKIN	-0.289664
		CAMK4	NOS3	S1177	NetworKIN	-0.0131306		CAMK4	NOS3	S1177	NetworKIN	0.327432		CAMK4	NOS3	S1177	NetworKIN	0.293683		CAMK4	NOS3	S1177	NetworKIN	0.281374
		CAMK4	PXN	S126	NetworKIN	0.250943		CAMK4	PXN	S126	NetworKIN	0.352722		CAMK4	PXN	S126	NetworKIN	0.321774		CAMK4	PXN	S126	NetworKIN	0.637746
		CAMK4	TJP1	S179	NetworKIN	-0.616034		CAMK4	TJP1	S179	NetworKIN	0.223655		CAMK4	TJP1	S179	NetworKIN	0.461425		CAMK4	TJP1	S179	NetworKIN	0.0557959
		CAMK4	EEF2K	S18	NetworKIN	0.328346		CAMK4	EEF2K	S18	NetworKIN	0.397035		CAMK4	EEF2K	S18	NetworKIN	0.0133363		CAMK4	EEF2K	S18	NetworKIN	0.909424
		CAMK4	SRFBP1	S203	NetworKIN	-0.558647		CAMK4	SRFBP1	S203	NetworKIN	0.0387667		CAMK4	SRFBP1	S203	NetworKIN	0.32365		CAMK4	SRFBP1	S203	NetworKIN	-0.740704
		CAMK4	YWHAZ	S207	NetworKIN	-0.494625		CAMK4	YWHAZ	S207	NetworKIN	0.570137		CAMK4	YWHAZ	S207	NetworKIN	0.665094		CAMK4	YWHAZ	S207	NetworKIN	0.242573
		CAMK4	HDAC4	S246	NetworKIN	-0.888715		CAMK4	HDAC4	S246	NetworKIN	-0.127961		CAMK4	HDAC4	S246	NetworKIN	0.635048		CAMK4	HDAC4	S246	NetworKIN	-0.109519
		CAMK4	VCL	S288	NetworKIN	-0.504292		CAMK4	VCL	S288	NetworKIN	0.777274		CAMK4	VCL	S288	NetworKIN	0.15941		CAMK4	VCL	S288	NetworKIN	0.550138
		CAMK4	CAMK2D	S333	NetworKIN	-0.560425		CAMK4	CAMK2D	S333	NetworKIN	-0.211429		CAMK4	CAMK2D	S333	NetworKIN	0.338293		CAMK4	CAMK2D	S333	NetworKIN	-0.229111
		CAMK4	HDAC4	S467	NetworKIN	-0.210882		CAMK4	HDAC4	S467	NetworKIN	0.581791		CAMK4	HDAC4	S467	NetworKIN	0.405821		CAMK4	HDAC4	S467	NetworKIN	-0.162936
		CAMK4	EEF2K	S500	NetworKIN	0.11764		CAMK4	EEF2K	S500	NetworKIN	0.726779		CAMK4	EEF2K	S500	NetworKIN	0.303068		CAMK4	EEF2K	S500	NetworKIN	-0.196356
		CAMK4	PML	S504	NetworKIN	-0.184441		CAMK4	PML	S504	NetworKIN	0.249706		CAMK4	PML	S504	NetworKIN	0.422576		CAMK4	PML	S504	NetworKIN	-0.0821662
		CAMK4	PML	S518	NetworKIN	-0.185972		CAMK4	PML	S518	NetworKIN	0.126151		CAMK4	PML	S518	NetworKIN	0.186494		CAMK4	PML	S518	NetworKIN	0.12446
		CAMK4	ADD2	S596	NetworKIN	-0.782446		CAMK4	ADD2	S596	NetworKIN	0.232002		CAMK4	ADD2	S596	NetworKIN	-0.460793		CAMK4	ADD2	S596	NetworKIN	0.105783
		CAMK4	HDAC4	S632	NetworKIN	-0.373879		CAMK4	HDAC4	S632	NetworKIN	0.633305		CAMK4	HDAC4	S632	NetworKIN	0.53748		CAMK4	HDAC4	S632	NetworKIN	-0.305869
		CAMK4	PRKCD	S645	NetworKIN	-1.07038		CAMK4	PRKCD	S645	NetworKIN	0.459041		CAMK4	PRKCD	S645	NetworKIN	-0.229784		CAMK4	PRKCD	S645	NetworKIN	0.165523
		CAMK4	CLASP1	S687	NetworKIN	-0.0993369		CAMK4	CLASP1	S687	NetworKIN	-0.0819915		CAMK4	CLASP1	S687	NetworKIN	-0.0107218		CAMK4	CLASP1	S687	NetworKIN	-0.0586988
		CAMK4	PHKB	S704	NetworKIN	0.0381902		CAMK4	PHKB	S704	NetworKIN	0.427814		CAMK4	PHKB	S704	NetworKIN	0.785407		CAMK4	PHKB	S704	NetworKIN	0.527899
		CAMK4	BAD	S75	NetworKIN	-0.425042		CAMK4	BAD	S75	NetworKIN	0.0516968		CAMK4	BAD	S75	NetworKIN	0.16052		CAMK4	BAD	S75	NetworKIN	0.130798
		CAMK4	EEF2K	S78	NetworKIN	-0.549207		CAMK4	EEF2K	S78	NetworKIN	-0.573163		CAMK4	EEF2K	S78	NetworKIN	0.0935944		CAMK4	EEF2K	S78	NetworKIN	0.0373495
		CAMK4	PRKAR2A	S78	NetworKIN	-0.334124		CAMK4	PRKAR2A	S78	NetworKIN	0.163518		CAMK4	PRKAR2A	S78	NetworKIN	0.130566		CAMK4	PRKAR2A	S78	NetworKIN	0.0710053
		CAMK4	PRKAR2A	S80	NetworKIN	-0.182898		CAMK4	PRKAR2A	S80	NetworKIN	0.127132		CAMK4	PRKAR2A	S80	NetworKIN	0.0832369		CAMK4	PRKAR2A	S80	NetworKIN	0.0238706
		CAMK4	GAPDH	S83	NetworKIN	-0.341329		CAMK4	GAPDH	S83	NetworKIN	-0.0671924		CAMK4	GAPDH	S83	NetworKIN	0.130685		CAMK4	GAPDH	S83	NetworKIN	-0.0366405
		CAMK4	PRKAR2A	S99	NetworKIN	-0.0930411		CAMK4	PRKAR2A	S99	NetworKIN	-0.0209813		CAMK4	PRKAR2A	S99	NetworKIN	-0.0103187		CAMK4	PRKAR2A	S99	NetworKIN	-0.0161239
		CDC42BPA	MYO18A	S1067	NetworKIN	0.731464		CDC42BPA	MYO18A	S1067	NetworKIN	0.407714		CDC42BPA	MYO18A	S1067	NetworKIN	0.0268157		CDC42BPA	MYO18A	S1067	NetworKIN	-0.0332869
		CDC42BPA	MYO18A	S1068	NetworKIN	0.52072		CDC42BPA	MYO18A	S1068	NetworKIN	0.984168		CDC42BPA	MYO18A	S1068	NetworKIN	0.134973		CDC42BPA	MYO18A	S1068	NetworKIN	0.163369
		CDC42BPA	MYO18A	S1070	NetworKIN	0.737301		CDC42BPA	MYO18A	S1070	NetworKIN	0.952492		CDC42BPA	MYO18A	S1070	NetworKIN	-0.299872		CDC42BPA	MYO18A	S1070	NetworKIN	0.0408424
		CDC42BPA	MYO18A	S140	NetworKIN	0.0630579		CDC42BPA	MYO18A	S140	NetworKIN	0.472569		CDC42BPA	MYO18A	S140	NetworKIN	0.136891		CDC42BPA	MYO18A	S140	NetworKIN	-0.0315597
		CDC42BPA	MYL2	S15	NetworKIN	-0.659829		CDC42BPA	MYL2	S15	NetworKIN	0.459953		CDC42BPA	MYL2	S15	NetworKIN	-0.0305012		CDC42BPA	MYL2	S15	NetworKIN	-0.161087
		CDC42BPA	MYO18A	S1942	NetworKIN	-0.184554		CDC42BPA	MYO18A	S1942	NetworKIN	0.239286		CDC42BPA	MYO18A	S1942	NetworKIN	0.253194		CDC42BPA	MYO18A	S1942	NetworKIN	0.00811084
		CDC42BPA	MYO18A	S1970	NetworKIN	-0.323759		CDC42BPA	MYO18A	S1970	NetworKIN	0.377771		CDC42BPA	MYO18A	S1970	NetworKIN	0.227243		CDC42BPA	MYO18A	S1970	NetworKIN	0.013604
		CDC42BPA	MYO18A	S1974	NetworKIN	-0.657097		CDC42BPA	MYO18A	S1974	NetworKIN	0.141162		CDC42BPA	MYO18A	S1974	NetworKIN	0.252463		CDC42BPA	MYO18A	S1974	NetworKIN	-0.0226923
		CDC42BPA	MYO18A	S2020	NetworKIN	-0.463167		CDC42BPA	MYO18A	S2020	NetworKIN	0.121384		CDC42BPA	MYO18A	S2020	NetworKIN	-0.0687059		CDC42BPA	MYO18A	S2020	NetworKIN	0.119627
		CDC42BPA	ZBTB7A	S526	NetworKIN	-0.0103659		CDC42BPA	ZBTB7A	S526	NetworKIN	0.097822		CDC42BPA	ZBTB7A	S526	NetworKIN	0.0798866		CDC42BPA	ZBTB7A	S526	NetworKIN	0.0224207
		CDC42BPA	ZBTB7A	S549	NetworKIN	-0.923682		CDC42BPA	ZBTB7A	S549	NetworKIN	0.0369261		CDC42BPA	ZBTB7A	S549	NetworKIN	0.194514		CDC42BPA	ZBTB7A	S549	NetworKIN	0.0289946
		CDC42BPB	MYO18A	S1067	NetworKIN	0.731464		CDC42BPB	MYO18A	S1067	NetworKIN	0.407714		CDC42BPB	MYO18A	S1067	NetworKIN	0.0268157		CDC42BPB	MYO18A	S1067	NetworKIN	-0.0332869
		CDC42BPB	MYO18A	S1068	NetworKIN	0.52072		CDC42BPB	MYO18A	S1068	NetworKIN	0.984168		CDC42BPB	MYO18A	S1068	NetworKIN	0.134973		CDC42BPB	MYO18A	S1068	NetworKIN	0.163369
		CDC42BPB	MYO18A	S1070	NetworKIN	0.737301		CDC42BPB	MYO18A	S1070	NetworKIN	0.952492		CDC42BPB	MYO18A	S1070	NetworKIN	-0.299872		CDC42BPB	MYO18A	S1070	NetworKIN	0.0408424
		CDC42BPB	MYO18A	S140	NetworKIN	0.0630579		CDC42BPB	MYO18A	S140	NetworKIN	0.472569		CDC42BPB	MYO18A	S140	NetworKIN	0.136891		CDC42BPB	MYO18A	S140	NetworKIN	-0.0315597
		CDC42BPB	MYO18A	S1942	NetworKIN	-0.184554		CDC42BPB	MYO18A	S1942	NetworKIN	0.239286		CDC42BPB	MYO18A	S1942	NetworKIN	0.253194		CDC42BPB	MYO18A	S1942	NetworKIN	0.00811084
		CDC42BPB	MYO18A	S1970	NetworKIN	-0.323759		CDC42BPB	MYO18A	S1970	NetworKIN	0.377771		CDC42BPB	MYO18A	S1970	NetworKIN	0.227243		CDC42BPB	MYO18A	S1970	NetworKIN	0.013604
		CDC42BPB	MYO18A	S1974	NetworKIN	-0.657097		CDC42BPB	MYO18A	S1974	NetworKIN	0.141162		CDC42BPB	MYO18A	S1974	NetworKIN	0.252463		CDC42BPB	MYO18A	S1974	NetworKIN	-0.0226923
		CDC42BPB	MYO18A	S2020	NetworKIN	-0.463167		CDC42BPB	MYO18A	S2020	NetworKIN	0.121384		CDC42BPB	MYO18A	S2020	NetworKIN	-0.0687059		CDC42BPB	MYO18A	S2020	NetworKIN	0.119627
		CDK1	CDKN1B	S10	NetworKIN	-0.528298		CDK1	CDKN1B	S10	NetworKIN	-0.157325		CDK1	CDKN1B	S10	NetworKIN	-0.0046816		CDK1	CDKN1B	S10	NetworKIN	-0.180952
		CDK1	TCEA1	S100	NetworKIN	-0.226995		CDK1	TCEA1	S100	NetworKIN	0.100738		CDK1	TCEA1	S100	NetworKIN	0.0623581		CDK1	TCEA1	S100	NetworKIN	0.0209023
		CDK1	EIF4EBP1	S101	NetworKIN	-0.266616		CDK1	EIF4EBP1	S101	NetworKIN	-0.00638354		CDK1	EIF4EBP1	S101	NetworKIN	0.127475		CDK1	EIF4EBP1	S101	NetworKIN	0.0756034
		CDK1	MED1	S1021	NetworKIN	-0.252924		CDK1	MED1	S1021	NetworKIN	0.10725		CDK1	MED1	S1021	NetworKIN	-0.133943		CDK1	MED1	S1021	NetworKIN	-0.148017
		CDK1	DNMT3A	S105	NetworKIN	-0.0694348		CDK1	DNMT3A	S105	NetworKIN	0.165683		CDK1	DNMT3A	S105	NetworKIN	0.0213841		CDK1	DNMT3A	S105	NetworKIN	0.0803722
		CDK1	PXN	S106	NetworKIN	0.482801		CDK1	PXN	S106	NetworKIN	0.549764		CDK1	PXN	S106	NetworKIN	0.162662		CDK1	PXN	S106	NetworKIN	0.628238
		CDK1	IRS1	S1078	NetworKIN	-0.388847		CDK1	IRS1	S1078	NetworKIN	-0.342383		CDK1	IRS1	S1078	NetworKIN	0.0418062		CDK1	IRS1	S1078	NetworKIN	-0.156188
		CDK1	SOS1	S1082	NetworKIN	0.0140934		CDK1	SOS1	S1082	NetworKIN	0.381437		CDK1	SOS1	S1082	NetworKIN	0.0260501		CDK1	SOS1	S1082	NetworKIN	0.112974
		CDK1	TP53BP1	S1106	NetworKIN	-0.218392		CDK1	TP53BP1	S1106	NetworKIN	0.0885608		CDK1	TP53BP1	S1106	NetworKIN	0.127199		CDK1	TP53BP1	S1106	NetworKIN	-0.0597254
		CDK1	TP53BP1	S1119	NetworKIN	-0.106117		CDK1	TP53BP1	S1119	NetworKIN	0.378529		CDK1	TP53BP1	S1119	NetworKIN	0.781752		CDK1	TP53BP1	S1119	NetworKIN	0.0416816
		CDK1	NSFL1C	S114	NetworKIN	-0.660207		CDK1	NSFL1C	S114	NetworKIN	0.132375		CDK1	NSFL1C	S114	NetworKIN	0.139799		CDK1	NSFL1C	S114	NetworKIN	0.0334199
		CDK1	DES	S12	NetworKIN	-0.333194		CDK1	DES	S12	NetworKIN	0.213624		CDK1	DES	S12	NetworKIN	-0.0949433		CDK1	DES	S12	NetworKIN	0.299382
		CDK1	MAP1B	S1256	NetworKIN	-0.25409		CDK1	MAP1B	S1256	NetworKIN	0.106134		CDK1	MAP1B	S1256	NetworKIN	0.154528		CDK1	MAP1B	S1256	NetworKIN	0.00145506
		CDK1	MAP1B	S1265	NetworKIN	-0.231074		CDK1	MAP1B	S1265	NetworKIN	0.365886		CDK1	MAP1B	S1265	NetworKIN	0.245004		CDK1	MAP1B	S1265	NetworKIN	0.172535
		CDK1	MCM2	S13	NetworKIN	0.195931		CDK1	MCM2	S13	NetworKIN	0.0810472		CDK1	MCM2	S13	NetworKIN	0.165028		CDK1	MCM2	S13	NetworKIN	-0.0159293
		CDK1	TACC2	S1313	NetworKIN	-0.299232		CDK1	TACC2	S1313	NetworKIN	0.321304		CDK1	TACC2	S1313	NetworKIN	0.150396		CDK1	TACC2	S1313	NetworKIN	0.0172746
		CDK1	TSC2	S1388	NetworKIN	-0.665574		CDK1	TSC2	S1388	NetworKIN	0.312593		CDK1	TSC2	S1388	NetworKIN	0.345871		CDK1	TSC2	S1388	NetworKIN	-0.03507
		CDK1	MAP1B	S1396	NetworKIN	-0.126766		CDK1	MAP1B	S1396	NetworKIN	0.697487		CDK1	MAP1B	S1396	NetworKIN	0.375667		CDK1	MAP1B	S1396	NetworKIN	0.498846
		CDK1	TSC2	S1411	NetworKIN	0.187904		CDK1	TSC2	S1411	NetworKIN	-0.0176994		CDK1	TSC2	S1411	NetworKIN	-0.148274		CDK1	TSC2	S1411	NetworKIN	0.0432427
		CDK1	TSC2	S1449	NetworKIN	-0.550769		CDK1	TSC2	S1449	NetworKIN	-0.231362		CDK1	TSC2	S1449	NetworKIN	-0.101635		CDK1	TSC2	S1449	NetworKIN	0.0690418
		CDK1	NCOR2	S149	NetworKIN	-0.218877		CDK1	NCOR2	S149	NetworKIN	0.0796474		CDK1	NCOR2	S149	NetworKIN	0.0575529		CDK1	NCOR2	S149	NetworKIN	-0.147221
		CDK1	NCOR2	S152	NetworKIN	-0.223786		CDK1	NCOR2	S152	NetworKIN	0.10348		CDK1	NCOR2	S152	NetworKIN	0.100377		CDK1	NCOR2	S152	NetworKIN	-0.126666
		CDK1	FGFR1OP	S156	NetworKIN	-0.964901		CDK1	FGFR1OP	S156	NetworKIN	-0.108109		CDK1	FGFR1OP	S156	NetworKIN	0.523001		CDK1	FGFR1OP	S156	NetworKIN	0.247673
		CDK1	PSMD2	S16	NetworKIN	-0.186299		CDK1	PSMD2	S16	NetworKIN	0.213397		CDK1	PSMD2	S16	NetworKIN	0.386097		CDK1	PSMD2	S16	NetworKIN	0.730443
		CDK1	FGFR1OP	S160	NetworKIN	-1.03775		CDK1	FGFR1OP	S160	NetworKIN	-0.0750489		CDK1	FGFR1OP	S160	NetworKIN	0.546493		CDK1	FGFR1OP	S160	NetworKIN	0.252689
		CDK1	KIF13B	S1644	NetworKIN	-0.308721		CDK1	KIF13B	S1644	NetworKIN	-0.0986579		CDK1	KIF13B	S1644	NetworKIN	0.120185		CDK1	KIF13B	S1644	NetworKIN	0.171322
		CDK1	GTF3C2	S167	NetworKIN	-1.10164		CDK1	GTF3C2	S167	NetworKIN	0.0288951		CDK1	GTF3C2	S167	NetworKIN	0.117044		CDK1	GTF3C2	S167	NetworKIN	-0.285516
		CDK1	MAP1B	S1779	NetworKIN	-0.948941		CDK1	MAP1B	S1779	NetworKIN	0.580999		CDK1	MAP1B	S1779	NetworKIN	0.841979		CDK1	MAP1B	S1779	NetworKIN	0.0737492
		CDK1	CDKN1B	S178	NetworKIN	-0.765252		CDK1	CDKN1B	S178	NetworKIN	-0.0200448		CDK1	CDKN1B	S178	NetworKIN	0.141546		CDK1	CDKN1B	S178	NetworKIN	-0.289854
		CDK1	EEF2K	S18	NetworKIN	0.328346		CDK1	EEF2K	S18	NetworKIN	0.397035		CDK1	EEF2K	S18	NetworKIN	0.0133363		CDK1	EEF2K	S18	NetworKIN	0.909424
		CDK1	TPPP	S18	NetworKIN	-0.122499		CDK1	TPPP	S18	NetworKIN	-0.100004		CDK1	TPPP	S18	NetworKIN	0.0107989		CDK1	TPPP	S18	NetworKIN	0.0617607
		CDK1	ARAF	S186	NetworKIN	-0.0510334		CDK1	ARAF	S186	NetworKIN	0.315746		CDK1	ARAF	S186	NetworKIN	0.048951		CDK1	ARAF	S186	NetworKIN	0.60593
		CDK1	TRIM28	S19	NetworKIN	-0.216339		CDK1	TRIM28	S19	NetworKIN	0.0810884		CDK1	TRIM28	S19	NetworKIN	0.0209304		CDK1	TRIM28	S19	NetworKIN	-0.253461
		CDK1	MAP1B	S1915	NetworKIN	-0.241206		CDK1	MAP1B	S1915	NetworKIN	0.052014		CDK1	MAP1B	S1915	NetworKIN	0.0933937		CDK1	MAP1B	S1915	NetworKIN	0.141555
		CDK1	CD2BP2	S195	NetworKIN	0.00640275		CDK1	CD2BP2	S195	NetworKIN	0.13071		CDK1	CD2BP2	S195	NetworKIN	0.0116779		CDK1	CD2BP2	S195	NetworKIN	-0.29719
		CDK1	NUCKS1	S204	NetworKIN	-0.781334		CDK1	NUCKS1	S204	NetworKIN	0.0487248		CDK1	NUCKS1	S204	NetworKIN	0.387923		CDK1	NUCKS1	S204	NetworKIN	-0.209093
		CDK1	DYNC1LI1	S207	NetworKIN	0.250333		CDK1	DYNC1LI1	S207	NetworKIN	0.403865		CDK1	DYNC1LI1	S207	NetworKIN	0.166757		CDK1	DYNC1LI1	S207	NetworKIN	1.27
		CDK1	NUCKS1	S214	NetworKIN	-0.728939		CDK1	NUCKS1	S214	NetworKIN	0.124331		CDK1	NUCKS1	S214	NetworKIN	0.35538		CDK1	NUCKS1	S214	NetworKIN	-0.123881
		CDK1	NUCKS1	S223	NetworKIN	-0.34186		CDK1	NUCKS1	S223	NetworKIN	0.234185		CDK1	NUCKS1	S223	NetworKIN	0.364457		CDK1	NUCKS1	S223	NetworKIN	-0.0195077
		CDK1	SRF	S224	NetworKIN	0.00155716		CDK1	SRF	S224	NetworKIN	0.127613		CDK1	SRF	S224	NetworKIN	0.066159		CDK1	SRF	S224	NetworKIN	0.0530009
		CDK1	EPS15L1	S229	NetworKIN	-0.0327244		CDK1	EPS15L1	S229	NetworKIN	0.125388		CDK1	EPS15L1	S229	NetworKIN	0.103704		CDK1	EPS15L1	S229	NetworKIN	0.181221
		CDK1	STRN3	S229	NetworKIN	-0.190119		CDK1	STRN3	S229	NetworKIN	0.381712		CDK1	STRN3	S229	NetworKIN	0.234038		CDK1	STRN3	S229	NetworKIN	0.285153
		CDK1	NR1D1	S23	NetworKIN	0.00947981		CDK1	NR1D1	S23	NetworKIN	0.276842		CDK1	NR1D1	S23	NetworKIN	0.358212		CDK1	NR1D1	S23	NetworKIN	0.137758
		CDK1	SVIL	S245	NetworKIN	-0.413411		CDK1	SVIL	S245	NetworKIN	-0.0230588		CDK1	SVIL	S245	NetworKIN	0.14274		CDK1	SVIL	S245	NetworKIN	0.17551
		CDK1	EPS15L1	S255	NetworKIN	-0.353088		CDK1	EPS15L1	S255	NetworKIN	0.0754535		CDK1	EPS15L1	S255	NetworKIN	0.15347		CDK1	EPS15L1	S255	NetworKIN	-0.0240902
		CDK1	ARAF	S257	NetworKIN	-0.649631		CDK1	ARAF	S257	NetworKIN	-0.444648		CDK1	ARAF	S257	NetworKIN	0.344117		CDK1	ARAF	S257	NetworKIN	-0.0566116
		CDK1	BAG3	S264	NetworKIN	-0.412851		CDK1	BAG3	S264	NetworKIN	-0.386924		CDK1	BAG3	S264	NetworKIN	-0.257316		CDK1	BAG3	S264	NetworKIN	-0.171906
		CDK1	XRCC1	S266	NetworKIN	-0.163976		CDK1	XRCC1	S266	NetworKIN	0.0861755		CDK1	XRCC1	S266	NetworKIN	0.531151		CDK1	XRCC1	S266	NetworKIN	-0.0973652
		CDK1	MCM2	S27	NetworKIN	0.110576		CDK1	MCM2	S27	NetworKIN	0.0105636		CDK1	MCM2	S27	NetworKIN	0.0502351		CDK1	MCM2	S27	NetworKIN	-0.0487243
		CDK1	TP53BP1	S270	NetworKIN	-0.218746		CDK1	TP53BP1	S270	NetworKIN	0.019618		CDK1	TP53BP1	S270	NetworKIN	0.125975		CDK1	TP53BP1	S270	NetworKIN	-0.179923
		CDK1	SIN3A	S277	NetworKIN	-0.450337		CDK1	SIN3A	S277	NetworKIN	-0.466927		CDK1	SIN3A	S277	NetworKIN	0.121143		CDK1	SIN3A	S277	NetworKIN	-0.158088
		CDK1	FOXO1	S287	NetworKIN	-0.491937		CDK1	FOXO1	S287	NetworKIN	0.173654		CDK1	FOXO1	S287	NetworKIN	0.225351		CDK1	FOXO1	S287	NetworKIN	-0.0751309
		CDK1	BAG3	S291	NetworKIN	-1.25832		CDK1	BAG3	S291	NetworKIN	-0.70892		CDK1	BAG3	S291	NetworKIN	0.696913		CDK1	BAG3	S291	NetworKIN	-0.0393782
		CDK1	TP53BP1	S299	NetworKIN	-0.427996		CDK1	TP53BP1	S299	NetworKIN	0.256522		CDK1	TP53BP1	S299	NetworKIN	0.268859		CDK1	TP53BP1	S299	NetworKIN	0.0184124
		CDK1	HSF1	S303	NetworKIN	-0.107151		CDK1	HSF1	S303	NetworKIN	0.137637		CDK1	HSF1	S303	NetworKIN	0.269102		CDK1	HSF1	S303	NetworKIN	-0.447623
		CDK1	HSF1	S307	NetworKIN	-0.123465		CDK1	HSF1	S307	NetworKIN	0.130728		CDK1	HSF1	S307	NetworKIN	0.25749		CDK1	HSF1	S307	NetworKIN	-0.424613
		CDK1	UBE4B	S31	NetworKIN	0.251849		CDK1	UBE4B	S31	NetworKIN	1.77879		CDK1	UBE4B	S31	NetworKIN	-0.0331553		CDK1	UBE4B	S31	NetworKIN	1.28354
		CDK1	DNAJB2	S313	NetworKIN	-0.180425		CDK1	DNAJB2	S313	NetworKIN	0.121102		CDK1	DNAJB2	S313	NetworKIN	0.147302		CDK1	DNAJB2	S313	NetworKIN	0.0606692
		CDK1	PSMD1	S315	NetworKIN	-0.690712		CDK1	PSMD1	S315	NetworKIN	0.0135218		CDK1	PSMD1	S315	NetworKIN	0.916527		CDK1	PSMD1	S315	NetworKIN	0.0847997
		CDK1	DES	S32	NetworKIN	-0.538633		CDK1	DES	S32	NetworKIN	0.141197		CDK1	DES	S32	NetworKIN	-0.0167935		CDK1	DES	S32	NetworKIN	-0.486201
		CDK1	BCL6	S333	NetworKIN	-0.384973		CDK1	BCL6	S333	NetworKIN	0.547526		CDK1	BCL6	S333	NetworKIN	0.361654		CDK1	BCL6	S333	NetworKIN	0.623539
		CDK1	IRS1	S348	NetworKIN	-0.186318		CDK1	IRS1	S348	NetworKIN	-0.0961616		CDK1	IRS1	S348	NetworKIN	0.101395		CDK1	IRS1	S348	NetworKIN	-0.0400865
		CDK1	DMD	S3537	NetworKIN	0.150303		CDK1	DMD	S3537	NetworKIN	0.169864		CDK1	DMD	S3537	NetworKIN	0.372196		CDK1	DMD	S3537	NetworKIN	0.793258
		CDK1	DMD	S3541	NetworKIN	0.0623651		CDK1	DMD	S3541	NetworKIN	0.215845		CDK1	DMD	S3541	NetworKIN	0.292398		CDK1	DMD	S3541	NetworKIN	0.937567
		CDK1	DMD	S3549	NetworKIN	-0.0140311		CDK1	DMD	S3549	NetworKIN	1.19087		CDK1	DMD	S3549	NetworKIN	0.21265		CDK1	DMD	S3549	NetworKIN	1.30371
		CDK1	CSNK1D	S356	NetworKIN	-0.51405		CDK1	CSNK1D	S356	NetworKIN	-0.0193089		CDK1	CSNK1D	S356	NetworKIN	0.444564		CDK1	CSNK1D	S356	NetworKIN	-0.169664
		CDK1	DMD	S3613	NetworKIN	0.0179903		CDK1	DMD	S3613	NetworKIN	0.757831		CDK1	DMD	S3613	NetworKIN	-0.143338		CDK1	DMD	S3613	NetworKIN	1.11545
		CDK1	ARID1A	S363	NetworKIN	-0.135824		CDK1	ARID1A	S363	NetworKIN	0.11224		CDK1	ARID1A	S363	NetworKIN	0.00579136		CDK1	ARID1A	S363	NetworKIN	-0.133287
		CDK1	HSF1	S363	NetworKIN	8.89996e-06		CDK1	HSF1	S363	NetworKIN	0.143189		CDK1	HSF1	S363	NetworKIN	0.517889		CDK1	HSF1	S363	NetworKIN	0.235229
		CDK1	PTRF	S366	NetworKIN	-0.62879		CDK1	PTRF	S366	NetworKIN	0.348107		CDK1	PTRF	S366	NetworKIN	0.311701		CDK1	PTRF	S366	NetworKIN	0.102724
		CDK1	CAMK2B	S367	NetworKIN	0.669315		CDK1	CAMK2B	S367	NetworKIN	0.964214		CDK1	CAMK2B	S367	NetworKIN	0.279568		CDK1	CAMK2B	S367	NetworKIN	2.45751
		CDK1	PRKAA2	S377	NetworKIN	-0.748038		CDK1	PRKAA2	S377	NetworKIN	-0.159831		CDK1	PRKAA2	S377	NetworKIN	0.464409		CDK1	PRKAA2	S377	NetworKIN	0.0175332
		CDK1	TP53BP1	S385	NetworKIN	-0.0236709		CDK1	TP53BP1	S385	NetworKIN	0.17987		CDK1	TP53BP1	S385	NetworKIN	0.156123		CDK1	TP53BP1	S385	NetworKIN	0.0765511
		CDK1	BAG3	S386	NetworKIN	0.119887		CDK1	BAG3	S386	NetworKIN	0.0603983		CDK1	BAG3	S386	NetworKIN	-0.0282646		CDK1	BAG3	S386	NetworKIN	0.418831
		CDK1	LMNA	S395	NetworKIN	-0.0416016		CDK1	LMNA	S395	NetworKIN	0.144808		CDK1	LMNA	S395	NetworKIN	0.213163		CDK1	LMNA	S395	NetworKIN	0.167711
		CDK1	MCM2	S41	NetworKIN	0.0346419		CDK1	MCM2	S41	NetworKIN	0.0623795		CDK1	MCM2	S41	NetworKIN	0.137022		CDK1	MCM2	S41	NetworKIN	-0.0603266
		CDK1	LMNA	S414	NetworKIN	0.0867899		CDK1	LMNA	S414	NetworKIN	0.540037		CDK1	LMNA	S414	NetworKIN	-0.0840978		CDK1	LMNA	S414	NetworKIN	0.0322994
		CDK1	TAOK1	S421	NetworKIN	-0.18339		CDK1	TAOK1	S421	NetworKIN	0.104857		CDK1	TAOK1	S421	NetworKIN	0.0129262		CDK1	TAOK1	S421	NetworKIN	0.217805
		CDK1	FOXO3	S425	NetworKIN	0.0562367		CDK1	FOXO3	S425	NetworKIN	0.370337		CDK1	FOXO3	S425	NetworKIN	-0.0204672		CDK1	FOXO3	S425	NetworKIN	0.683467
		CDK1	NUP214	S430	NetworKIN	0.0630411		CDK1	NUP214	S430	NetworKIN	0.561932		CDK1	NUP214	S430	NetworKIN	0.307629		CDK1	NUP214	S430	NetworKIN	0.517858
		CDK1	XRCC1	S447	NetworKIN	-1.14615		CDK1	XRCC1	S447	NetworKIN	-0.0407026		CDK1	XRCC1	S447	NetworKIN	0.644739		CDK1	XRCC1	S447	NetworKIN	-0.304747
		CDK1	FOXO1	S470	NetworKIN	-0.422833		CDK1	FOXO1	S470	NetworKIN	0.488398		CDK1	FOXO1	S470	NetworKIN	0.242123		CDK1	FOXO1	S470	NetworKIN	0.030756
		CDK1	NES	S471	NetworKIN	0.22606		CDK1	NES	S471	NetworKIN	0.343726		CDK1	NES	S471	NetworKIN	0.541035		CDK1	NES	S471	NetworKIN	0.0265833
		CDK1	EMD	S49	NetworKIN	0.0694117		CDK1	EMD	S49	NetworKIN	0.0871672		CDK1	EMD	S49	NetworKIN	0.0940033		CDK1	EMD	S49	NetworKIN	0.105444
		CDK1	TACC2	S493	NetworKIN	-0.00726478		CDK1	TACC2	S493	NetworKIN	-0.0746986		CDK1	TACC2	S493	NetworKIN	-0.0344027		CDK1	TACC2	S493	NetworKIN	0.466992
		CDK1	EEF1D	S499	NetworKIN	-0.0354713		CDK1	EEF1D	S499	NetworKIN	-0.200989		CDK1	EEF1D	S499	NetworKIN	-0.358979		CDK1	EEF1D	S499	NetworKIN	-0.196898
		CDK1	CD2AP	S510	NetworKIN	-0.181175		CDK1	CD2AP	S510	NetworKIN	0.432112		CDK1	CD2AP	S510	NetworKIN	0.60021		CDK1	CD2AP	S510	NetworKIN	0.454547
		CDK1	DYNC1LI1	S516	NetworKIN	0.612647		CDK1	DYNC1LI1	S516	NetworKIN	2.10381		CDK1	DYNC1LI1	S516	NetworKIN	0.244713		CDK1	DYNC1LI1	S516	NetworKIN	0.910572
		CDK1	TP53BP1	S557	NetworKIN	-0.126888		CDK1	TP53BP1	S557	NetworKIN	0.358962		CDK1	TP53BP1	S557	NetworKIN	0.499525		CDK1	TP53BP1	S557	NetworKIN	0.302546
		CDK1	PSMA5	S56	NetworKIN	-0.278007		CDK1	PSMA5	S56	NetworKIN	0.164546		CDK1	PSMA5	S56	NetworKIN	0.226747		CDK1	PSMA5	S56	NetworKIN	0.505129
		CDK1	VIM	S56	NetworKIN	-0.0477292		CDK1	VIM	S56	NetworKIN	0.689617		CDK1	VIM	S56	NetworKIN	0.312762		CDK1	VIM	S56	NetworKIN	0.198222
		CDK1	KHDRBS1	S58	NetworKIN	-0.401757		CDK1	KHDRBS1	S58	NetworKIN	0.353016		CDK1	KHDRBS1	S58	NetworKIN	0.283647		CDK1	KHDRBS1	S58	NetworKIN	-0.314084
		CDK1	TBC1D1	S585	NetworKIN	-0.249347		CDK1	TBC1D1	S585	NetworKIN	-0.1093		CDK1	TBC1D1	S585	NetworKIN	0.161208		CDK1	TBC1D1	S585	NetworKIN	0.257708
		CDK1	RB1CC1	S647	NetworKIN	0.288529		CDK1	RB1CC1	S647	NetworKIN	0.0816848		CDK1	RB1CC1	S647	NetworKIN	0.262503		CDK1	RB1CC1	S647	NetworKIN	0.246929
		CDK1	LMNA	S652	NetworKIN	-0.306669		CDK1	LMNA	S652	NetworKIN	0.914831		CDK1	LMNA	S652	NetworKIN	-0.128259		CDK1	LMNA	S652	NetworKIN	0.479564
		CDK1	NUP214	S666	NetworKIN	-0.332204		CDK1	NUP214	S666	NetworKIN	0.088025		CDK1	NUP214	S666	NetworKIN	0.0501378		CDK1	NUP214	S666	NetworKIN	-0.0137164
		CDK1	NCL	S67	NetworKIN	-0.0292894		CDK1	NCL	S67	NetworKIN	0.129648		CDK1	NCL	S67	NetworKIN	0.140465		CDK1	NCL	S67	NetworKIN	0.247475
		CDK1	NES	S680	NetworKIN	0.576015		CDK1	NES	S680	NetworKIN	0.466154		CDK1	NES	S680	NetworKIN	0.73391		CDK1	NES	S680	NetworKIN	0.0862037
		CDK1	PCM1	S69	NetworKIN	-0.351015		CDK1	PCM1	S69	NetworKIN	-0.144387		CDK1	PCM1	S69	NetworKIN	0.0673816		CDK1	PCM1	S69	NetworKIN	-0.200237
		CDK1	DYNC1I2	S73	NetworKIN	-0.12122		CDK1	DYNC1I2	S73	NetworKIN	0.415249		CDK1	DYNC1I2	S73	NetworKIN	0.227097		CDK1	DYNC1I2	S73	NetworKIN	1.17591
		CDK1	JUN	S73	NetworKIN	0.571589		CDK1	JUN	S73	NetworKIN	0.577378		CDK1	JUN	S73	NetworKIN	0.174698		CDK1	JUN	S73	NetworKIN	0.828948
		CDK1	EEF2K	S74	NetworKIN	-0.986757		CDK1	EEF2K	S74	NetworKIN	-0.909708		CDK1	EEF2K	S74	NetworKIN	0.274442		CDK1	EEF2K	S74	NetworKIN	0.193665
		CDK1	RANBP2	S788	NetworKIN	-0.418299		CDK1	RANBP2	S788	NetworKIN	-0.0984847		CDK1	RANBP2	S788	NetworKIN	0.143333		CDK1	RANBP2	S788	NetworKIN	-0.0834799
		CDK1	GTF3C2	S893	NetworKIN	-0.393442		CDK1	GTF3C2	S893	NetworKIN	0.401038		CDK1	GTF3C2	S893	NetworKIN	0.039109		CDK1	GTF3C2	S893	NetworKIN	-0.0110283
		CDK1	RBL2	S952	NetworKIN	0.0813378		CDK1	RBL2	S952	NetworKIN	0.25072		CDK1	RBL2	S952	NetworKIN	0.0865094		CDK1	RBL2	S952	NetworKIN	0.166277
		CDK1	TAOK1	S965	NetworKIN	-0.481127		CDK1	TAOK1	S965	NetworKIN	-0.130136		CDK1	TAOK1	S965	NetworKIN	0.169644		CDK1	TAOK1	S965	NetworKIN	-0.152023
		CDK1	VCPIP1	S998	NetworKIN	-0.957121		CDK1	VCPIP1	S998	NetworKIN	0.186903		CDK1	VCPIP1	S998	NetworKIN	0.115		CDK1	VCPIP1	S998	NetworKIN	-0.256852
		CDK1	TP53BP1	T1061	NetworKIN	-0.129077		CDK1	TP53BP1	T1061	NetworKIN	0.594749		CDK1	TP53BP1	T1061	NetworKIN	-0.0893377		CDK1	TP53BP1	T1061	NetworKIN	0.188702
		CDK1	TPPP	T14	NetworKIN	-0.292932		CDK1	TPPP	T14	NetworKIN	0.0975464		CDK1	TPPP	T14	NetworKIN	0.169341		CDK1	TPPP	T14	NetworKIN	0.0561692
		CDK1	CLIP1	T140	NetworKIN	-0.132782		CDK1	CLIP1	T140	NetworKIN	0.141952		CDK1	CLIP1	T140	NetworKIN	0.441652		CDK1	CLIP1	T140	NetworKIN	-0.19982
		CDK1	PAK2	T143	NetworKIN	-0.255329		CDK1	PAK2	T143	NetworKIN	0.258572		CDK1	PAK2	T143	NetworKIN	-0.0330861		CDK1	PAK2	T143	NetworKIN	-0.103647
		CDK1	MARCKS	T150	NetworKIN	-1.09794		CDK1	MARCKS	T150	NetworKIN	0.0719006		CDK1	MARCKS	T150	NetworKIN	0.577754		CDK1	MARCKS	T150	NetworKIN	-0.085033
		CDK1	TMPO	T160	NetworKIN	-0.2248		CDK1	TMPO	T160	NetworKIN	0.0317219		CDK1	TMPO	T160	NetworKIN	0.126201		CDK1	TMPO	T160	NetworKIN	0.0238713
		CDK1	NUCKS1	T179	NetworKIN	-0.134828		CDK1	NUCKS1	T179	NetworKIN	0.0932812		CDK1	NUCKS1	T179	NetworKIN	-0.119521		CDK1	NUCKS1	T179	NetworKIN	-0.556374
		CDK1	NUCKS1	T202	NetworKIN	-0.862665		CDK1	NUCKS1	T202	NetworKIN	0.116		CDK1	NUCKS1	T202	NetworKIN	0.43082		CDK1	NUCKS1	T202	NetworKIN	-0.197362
		CDK1	MEPCE	T213	NetworKIN	-0.344407		CDK1	MEPCE	T213	NetworKIN	0.39272		CDK1	MEPCE	T213	NetworKIN	0.105841		CDK1	MEPCE	T213	NetworKIN	0.100678
		CDK1	ACTN2	T237	NetworKIN	-0.247807		CDK1	ACTN2	T237	NetworKIN	0.556761		CDK1	ACTN2	T237	NetworKIN	0.0725644		CDK1	ACTN2	T237	NetworKIN	0.836625
		CDK1	RAF1	T260	NetworKIN	0.00781058		CDK1	RAF1	T260	NetworKIN	0.233051		CDK1	RAF1	T260	NetworKIN	0.0237345		CDK1	RAF1	T260	NetworKIN	0.105397
		CDK1	PSMD1	T273	NetworKIN	-0.119107		CDK1	PSMD1	T273	NetworKIN	0.612823		CDK1	PSMD1	T273	NetworKIN	0.831272		CDK1	PSMD1	T273	NetworKIN	1.77765
		CDK1	MAP2K6	T28	NetworKIN	-0.897324		CDK1	MAP2K6	T28	NetworKIN	0.107718		CDK1	MAP2K6	T28	NetworKIN	-0.102275		CDK1	MAP2K6	T28	NetworKIN	-0.00768202
		CDK1	BAG3	T285	NetworKIN	-1.08621		CDK1	BAG3	T285	NetworKIN	-0.743958		CDK1	BAG3	T285	NetworKIN	0.448082		CDK1	BAG3	T285	NetworKIN	-0.0762546
		CDK1	PTRF	T302	NetworKIN	-0.552625		CDK1	PTRF	T302	NetworKIN	0.129993		CDK1	PTRF	T302	NetworKIN	-0.34209		CDK1	PTRF	T302	NetworKIN	0.0137855
		CDK1	PSMD1	T311	NetworKIN	-0.664552		CDK1	PSMD1	T311	NetworKIN	-0.00262254		CDK1	PSMD1	T311	NetworKIN	0.832123		CDK1	PSMD1	T311	NetworKIN	0.0750764
		CDK1	PPP1CB	T316	NetworKIN	-0.218314		CDK1	PPP1CB	T316	NetworKIN	-0.19495		CDK1	PPP1CB	T316	NetworKIN	0.208652		CDK1	PPP1CB	T316	NetworKIN	-0.140685
		CDK1	MAPKAPK2	T334	NetworKIN	-0.073599		CDK1	MAPKAPK2	T334	NetworKIN	1.13358		CDK1	MAPKAPK2	T334	NetworKIN	0.00633436		CDK1	MAPKAPK2	T334	NetworKIN	-0.0313418
		CDK1	TAF3	T339	NetworKIN	-0.17972		CDK1	TAF3	T339	NetworKIN	0.0302257		CDK1	TAF3	T339	NetworKIN	0.131945		CDK1	TAF3	T339	NetworKIN	-0.0980797
		CDK1	ANXA2	T37	NetworKIN	-0.518883		CDK1	ANXA2	T37	NetworKIN	0.581483		CDK1	ANXA2	T37	NetworKIN	0.195782		CDK1	ANXA2	T37	NetworKIN	0.112396
		CDK1	CDC5L	T385	NetworKIN	-0.392209		CDK1	CDC5L	T385	NetworKIN	0.131912		CDK1	CDC5L	T385	NetworKIN	0.0621706		CDK1	CDC5L	T385	NetworKIN	0.311571
		CDK1	CDC5L	T396	NetworKIN	-0.381902		CDK1	CDC5L	T396	NetworKIN	0.158452		CDK1	CDC5L	T396	NetworKIN	0.0738193		CDK1	CDC5L	T396	NetworKIN	0.315931
		CDK1	NUP214	T437	NetworKIN	0.617433		CDK1	NUP214	T437	NetworKIN	0.811026		CDK1	NUP214	T437	NetworKIN	0.197753		CDK1	NUP214	T437	NetworKIN	0.665608
		CDK1	AKT2	T451	NetworKIN	0.0929033		CDK1	AKT2	T451	NetworKIN	0.398473		CDK1	AKT2	T451	NetworKIN	0.39947		CDK1	AKT2	T451	NetworKIN	0.04948
		CDK1	XRCC1	T453	NetworKIN	-0.995313		CDK1	XRCC1	T453	NetworKIN	0.0140948		CDK1	XRCC1	T453	NetworKIN	0.601803		CDK1	XRCC1	T453	NetworKIN	-0.212166
		CDK1	DYNC1LI1	T513	NetworKIN	0.00976005		CDK1	DYNC1LI1	T513	NetworKIN	1.19955		CDK1	DYNC1LI1	T513	NetworKIN	-0.111995		CDK1	DYNC1LI1	T513	NetworKIN	0.846057
		CDK1	EEF1D	T513	NetworKIN	-0.44125		CDK1	EEF1D	T513	NetworKIN	0.170322		CDK1	EEF1D	T513	NetworKIN	0.623836		CDK1	EEF1D	T513	NetworKIN	0.0704529
		CDK1	TMPO	T74	NetworKIN	0.0079726		CDK1	TMPO	T74	NetworKIN	0.0628416		CDK1	TMPO	T74	NetworKIN	0.0399418		CDK1	TMPO	T74	NetworKIN	-0.0839286
		CDK1	RBL2	T986	NetworKIN	-0.165582		CDK1	RBL2	T986	NetworKIN	0.0777571		CDK1	RBL2	T986	NetworKIN	0.328104		CDK1	RBL2	T986	NetworKIN	0.146114
		CDK2	CDKN1B	S10	NetworKIN	-0.528298		CDK2	CDKN1B	S10	NetworKIN	-0.157325		CDK2	CDKN1B	S10	NetworKIN	-0.0046816		CDK2	CDKN1B	S10	NetworKIN	-0.180952
		CDK2	EIF4EBP1	S101	NetworKIN	-0.266616		CDK2	EIF4EBP1	S101	NetworKIN	-0.00638354		CDK2	EIF4EBP1	S101	NetworKIN	0.127475		CDK2	EIF4EBP1	S101	NetworKIN	0.0756034
		CDK2	MED1	S1021	NetworKIN	-0.252924		CDK2	MED1	S1021	NetworKIN	0.10725		CDK2	MED1	S1021	NetworKIN	-0.133943		CDK2	MED1	S1021	NetworKIN	-0.148017
		CDK2	SOS1	S1082	NetworKIN	0.0140934		CDK2	SOS1	S1082	NetworKIN	0.381437		CDK2	SOS1	S1082	NetworKIN	0.0260501		CDK2	SOS1	S1082	NetworKIN	0.112974
		CDK2	SMARCA2	S1377	NetworKIN	-0.436127		CDK2	SMARCA2	S1377	NetworKIN	0.0665617		CDK2	SMARCA2	S1377	NetworKIN	0.438573		CDK2	SMARCA2	S1377	NetworKIN	0.115689
		CDK2	TSC2	S1388	NetworKIN	-0.665574		CDK2	TSC2	S1388	NetworKIN	0.312593		CDK2	TSC2	S1388	NetworKIN	0.345871		CDK2	TSC2	S1388	NetworKIN	-0.03507
		CDK2	TSC2	S1411	NetworKIN	0.187904		CDK2	TSC2	S1411	NetworKIN	-0.0176994		CDK2	TSC2	S1411	NetworKIN	-0.148274		CDK2	TSC2	S1411	NetworKIN	0.0432427
		CDK2	TSC2	S1449	NetworKIN	-0.550769		CDK2	TSC2	S1449	NetworKIN	-0.231362		CDK2	TSC2	S1449	NetworKIN	-0.101635		CDK2	TSC2	S1449	NetworKIN	0.0690418
		CDK2	NCOR2	S149	NetworKIN	-0.218877		CDK2	NCOR2	S149	NetworKIN	0.0796474		CDK2	NCOR2	S149	NetworKIN	0.0575529		CDK2	NCOR2	S149	NetworKIN	-0.147221
		CDK2	NCOR2	S152	NetworKIN	-0.223786		CDK2	NCOR2	S152	NetworKIN	0.10348		CDK2	NCOR2	S152	NetworKIN	0.100377		CDK2	NCOR2	S152	NetworKIN	-0.126666
		CDK2	PSMD2	S16	NetworKIN	-0.186299		CDK2	PSMD2	S16	NetworKIN	0.213397		CDK2	PSMD2	S16	NetworKIN	0.386097		CDK2	PSMD2	S16	NetworKIN	0.730443
		CDK2	CDKN1B	S178	NetworKIN	-0.765252		CDK2	CDKN1B	S178	NetworKIN	-0.0200448		CDK2	CDKN1B	S178	NetworKIN	0.141546		CDK2	CDKN1B	S178	NetworKIN	-0.289854
		CDK2	SRF	S224	NetworKIN	0.00155716		CDK2	SRF	S224	NetworKIN	0.127613		CDK2	SRF	S224	NetworKIN	0.066159		CDK2	SRF	S224	NetworKIN	0.0530009
		CDK2	ATXN1	S238	NetworKIN	-0.18922		CDK2	ATXN1	S238	NetworKIN	0.465476		CDK2	ATXN1	S238	NetworKIN	0.238694		CDK2	ATXN1	S238	NetworKIN	0.0584527
		CDK2	FOXO1	S287	NetworKIN	-0.491937		CDK2	FOXO1	S287	NetworKIN	0.173654		CDK2	FOXO1	S287	NetworKIN	0.225351		CDK2	FOXO1	S287	NetworKIN	-0.0751309
		CDK2	PSMD1	S315	NetworKIN	-0.690712		CDK2	PSMD1	S315	NetworKIN	0.0135218		CDK2	PSMD1	S315	NetworKIN	0.916527		CDK2	PSMD1	S315	NetworKIN	0.0847997
		CDK2	CCNK	S324	NetworKIN	-0.23042		CDK2	CCNK	S324	NetworKIN	0.0945346		CDK2	CCNK	S324	NetworKIN	0.184538		CDK2	CCNK	S324	NetworKIN	0.00187927
		CDK2	CCNK	S329	NetworKIN	-0.105039		CDK2	CCNK	S329	NetworKIN	0.112446		CDK2	CCNK	S329	NetworKIN	0.268875		CDK2	CCNK	S329	NetworKIN	0.0477753
		CDK2	SMARCA2	S329	NetworKIN	-0.402556		CDK2	SMARCA2	S329	NetworKIN	0.440169		CDK2	SMARCA2	S329	NetworKIN	0.554888		CDK2	SMARCA2	S329	NetworKIN	0.145748
		CDK2	PCYT1A	S331	NetworKIN	-0.00265316		CDK2	PCYT1A	S331	NetworKIN	0.157339		CDK2	PCYT1A	S331	NetworKIN	-0.107051		CDK2	PCYT1A	S331	NetworKIN	6.97e-05
		CDK2	BCL6	S333	NetworKIN	-0.384973		CDK2	BCL6	S333	NetworKIN	0.547526		CDK2	BCL6	S333	NetworKIN	0.361654		CDK2	BCL6	S333	NetworKIN	0.623539
		CDK2	SORBS1	S350	NetworKIN	-1.25414		CDK2	SORBS1	S350	NetworKIN	0.740059		CDK2	SORBS1	S350	NetworKIN	0.668165		CDK2	SORBS1	S350	NetworKIN	0.492761
		CDK2	XRCC1	S447	NetworKIN	-1.14615		CDK2	XRCC1	S447	NetworKIN	-0.0407026		CDK2	XRCC1	S447	NetworKIN	0.644739		CDK2	XRCC1	S447	NetworKIN	-0.304747
		CDK2	FOXO1	S470	NetworKIN	-0.422833		CDK2	FOXO1	S470	NetworKIN	0.488398		CDK2	FOXO1	S470	NetworKIN	0.242123		CDK2	FOXO1	S470	NetworKIN	0.030756
		CDK2	PIAS1	S503	NetworKIN	0.263479		CDK2	PIAS1	S503	NetworKIN	0.0939109		CDK2	PIAS1	S503	NetworKIN	-0.03973		CDK2	PIAS1	S503	NetworKIN	0.0460049
		CDK2	PML	S527	NetworKIN	-0.246481		CDK2	PML	S527	NetworKIN	0.116852		CDK2	PML	S527	NetworKIN	0.16327		CDK2	PML	S527	NetworKIN	0.157432
		CDK2	PSMA5	S56	NetworKIN	-0.278007		CDK2	PSMA5	S56	NetworKIN	0.164546		CDK2	PSMA5	S56	NetworKIN	0.226747		CDK2	PSMA5	S56	NetworKIN	0.505129
		CDK2	COIL	S566	NetworKIN	-0.0310432		CDK2	COIL	S566	NetworKIN	0.166686		CDK2	COIL	S566	NetworKIN	0.237415		CDK2	COIL	S566	NetworKIN	0.209104
		CDK2	JUN	S73	NetworKIN	0.571589		CDK2	JUN	S73	NetworKIN	0.577378		CDK2	JUN	S73	NetworKIN	0.174698		CDK2	JUN	S73	NetworKIN	0.828948
		CDK2	PML	S8	NetworKIN	-0.149804		CDK2	PML	S8	NetworKIN	0.0337018		CDK2	PML	S8	NetworKIN	0.340992		CDK2	PML	S8	NetworKIN	0.0520221
		CDK2	SORBS1	S86	NetworKIN	-0.485012		CDK2	SORBS1	S86	NetworKIN	-0.176313		CDK2	SORBS1	S86	NetworKIN	-0.118233		CDK2	SORBS1	S86	NetworKIN	-0.21369
		CDK2	TP53BP1	T1061	NetworKIN	-0.129077		CDK2	TP53BP1	T1061	NetworKIN	0.594749		CDK2	TP53BP1	T1061	NetworKIN	-0.0893377		CDK2	TP53BP1	T1061	NetworKIN	0.188702
		CDK2	PCNP	T139	NetworKIN	-1.23512		CDK2	PCNP	T139	NetworKIN	0.147844		CDK2	PCNP	T139	NetworKIN	0.30245		CDK2	PCNP	T139	NetworKIN	-0.00819269
		CDK2	RAF1	T260	NetworKIN	0.00781058		CDK2	RAF1	T260	NetworKIN	0.233051		CDK2	RAF1	T260	NetworKIN	0.0237345		CDK2	RAF1	T260	NetworKIN	0.105397
		CDK2	PSMD1	T273	NetworKIN	-0.119107		CDK2	PSMD1	T273	NetworKIN	0.612823		CDK2	PSMD1	T273	NetworKIN	0.831272		CDK2	PSMD1	T273	NetworKIN	1.77765
		CDK2	PSMD1	T311	NetworKIN	-0.664552		CDK2	PSMD1	T311	NetworKIN	-0.00262254		CDK2	PSMD1	T311	NetworKIN	0.832123		CDK2	PSMD1	T311	NetworKIN	0.0750764
		CDK2	MAPKAPK2	T334	NetworKIN	-0.073599		CDK2	MAPKAPK2	T334	NetworKIN	1.13358		CDK2	MAPKAPK2	T334	NetworKIN	0.00633436		CDK2	MAPKAPK2	T334	NetworKIN	-0.0313418
		CDK2	TAF3	T339	NetworKIN	-0.17972		CDK2	TAF3	T339	NetworKIN	0.0302257		CDK2	TAF3	T339	NetworKIN	0.131945		CDK2	TAF3	T339	NetworKIN	-0.0980797
		CDK2	CDC5L	T385	NetworKIN	-0.392209		CDK2	CDC5L	T385	NetworKIN	0.131912		CDK2	CDC5L	T385	NetworKIN	0.0621706		CDK2	CDC5L	T385	NetworKIN	0.311571
		CDK2	CDC5L	T396	NetworKIN	-0.381902		CDK2	CDC5L	T396	NetworKIN	0.158452		CDK2	CDC5L	T396	NetworKIN	0.0738193		CDK2	CDC5L	T396	NetworKIN	0.315931
		CDK2	AKT2	T451	NetworKIN	0.0929033		CDK2	AKT2	T451	NetworKIN	0.398473		CDK2	AKT2	T451	NetworKIN	0.39947		CDK2	AKT2	T451	NetworKIN	0.04948
		CDK2	EIF4EBP1	T70	NetworKIN	-0.588		CDK2	EIF4EBP1	T70	NetworKIN	-0.17976		CDK2	EIF4EBP1	T70	NetworKIN	0.14685		CDK2	EIF4EBP1	T70	NetworKIN	-0.177883
		CDK2	SORBS1	T82	NetworKIN	-0.44568		CDK2	SORBS1	T82	NetworKIN	-0.266188		CDK2	SORBS1	T82	NetworKIN	-0.18265		CDK2	SORBS1	T82	NetworKIN	-0.237212
		CDK2	RBL2	T986	NetworKIN	-0.165582		CDK2	RBL2	T986	NetworKIN	0.0777571		CDK2	RBL2	T986	NetworKIN	0.328104		CDK2	RBL2	T986	NetworKIN	0.146114
		CDK3	CDKN1B	S10	NetworKIN	-0.528298		CDK3	CDKN1B	S10	NetworKIN	-0.157325		CDK3	CDKN1B	S10	NetworKIN	-0.0046816		CDK3	CDKN1B	S10	NetworKIN	-0.180952
		CDK3	CDKN1B	S178	NetworKIN	-0.765252		CDK3	CDKN1B	S178	NetworKIN	-0.0200448		CDK3	CDKN1B	S178	NetworKIN	0.141546		CDK3	CDKN1B	S178	NetworKIN	-0.289854
		CDK3	CCNK	S324	NetworKIN	-0.23042		CDK3	CCNK	S324	NetworKIN	0.0945346		CDK3	CCNK	S324	NetworKIN	0.184538		CDK3	CCNK	S324	NetworKIN	0.00187927
		CDK3	CCNK	S329	NetworKIN	-0.105039		CDK3	CCNK	S329	NetworKIN	0.112446		CDK3	CCNK	S329	NetworKIN	0.268875		CDK3	CCNK	S329	NetworKIN	0.0477753
		CDK4	EIF4EBP1	S101	NetworKIN	-0.266616		CDK4	EIF4EBP1	S101	NetworKIN	-0.00638354		CDK4	EIF4EBP1	S101	NetworKIN	0.127475		CDK4	EIF4EBP1	S101	NetworKIN	0.0756034
		CDK4	SMC3	S1067	NetworKIN	-0.264537		CDK4	SMC3	S1067	NetworKIN	0.154629		CDK4	SMC3	S1067	NetworKIN	0.18749		CDK4	SMC3	S1067	NetworKIN	-0.23773
		CDK4	MCM2	S13	NetworKIN	0.195931		CDK4	MCM2	S13	NetworKIN	0.0810472		CDK4	MCM2	S13	NetworKIN	0.165028		CDK4	MCM2	S13	NetworKIN	-0.0159293
		CDK4	PSMD11	S14	NetworKIN	-0.0281957		CDK4	PSMD11	S14	NetworKIN	1.16118		CDK4	PSMD11	S14	NetworKIN	-0.0572608		CDK4	PSMD11	S14	NetworKIN	-0.0966174
		CDK4	PSMD2	S16	NetworKIN	-0.186299		CDK4	PSMD2	S16	NetworKIN	0.213397		CDK4	PSMD2	S16	NetworKIN	0.386097		CDK4	PSMD2	S16	NetworKIN	0.730443
		CDK4	RAD23B	S160	NetworKIN	0.52465		CDK4	RAD23B	S160	NetworKIN	1.13651		CDK4	RAD23B	S160	NetworKIN	0.297955		CDK4	RAD23B	S160	NetworKIN	1.72294
		CDK4	TJP1	S1619	NetworKIN	-0.0130722		CDK4	TJP1	S1619	NetworKIN	0.16543		CDK4	TJP1	S1619	NetworKIN	0.0600664		CDK4	TJP1	S1619	NetworKIN	0.0966184
		CDK4	TJP1	S175	NetworKIN	-0.560178		CDK4	TJP1	S175	NetworKIN	0.239159		CDK4	TJP1	S175	NetworKIN	0.368379		CDK4	TJP1	S175	NetworKIN	0.00479345
		CDK4	TJP1	S179	NetworKIN	-0.616034		CDK4	TJP1	S179	NetworKIN	0.223655		CDK4	TJP1	S179	NetworKIN	0.461425		CDK4	TJP1	S179	NetworKIN	0.0557959
		CDK4	SUMO1	S2	NetworKIN	-0.816545		CDK4	SUMO1	S2	NetworKIN	-0.0337032		CDK4	SUMO1	S2	NetworKIN	0.391683		CDK4	SUMO1	S2	NetworKIN	-0.317001
		CDK4	FOXO1	S256	NetworKIN	-0.417025		CDK4	FOXO1	S256	NetworKIN	-0.161306		CDK4	FOXO1	S256	NetworKIN	0.339167		CDK4	FOXO1	S256	NetworKIN	0.175884
		CDK4	SIRT1	S27	NetworKIN	-0.628387		CDK4	SIRT1	S27	NetworKIN	-0.0211236		CDK4	SIRT1	S27	NetworKIN	-0.0238376		CDK4	SIRT1	S27	NetworKIN	0.168533
		CDK4	TJP1	S280	NetworKIN	-0.282817		CDK4	TJP1	S280	NetworKIN	0.173075		CDK4	TJP1	S280	NetworKIN	0.272693		CDK4	TJP1	S280	NetworKIN	0.114362
		CDK4	HCFC1	S666	NetworKIN	-0.00351951		CDK4	HCFC1	S666	NetworKIN	0.691187		CDK4	HCFC1	S666	NetworKIN	0.0400353		CDK4	HCFC1	S666	NetworKIN	0.804223
		CDK4	TJP1	S927	NetworKIN	-0.337275		CDK4	TJP1	S927	NetworKIN	0.127776		CDK4	TJP1	S927	NetworKIN	0.146767		CDK4	TJP1	S927	NetworKIN	0.135689
		CDK4	RBL2	S982	NetworKIN	-0.13832		CDK4	RBL2	S982	NetworKIN	0.108639		CDK4	RBL2	S982	NetworKIN	0.512845		CDK4	RBL2	S982	NetworKIN	0.159421
		CDK4	RAD23B	T155	NetworKIN	0.290434		CDK4	RAD23B	T155	NetworKIN	1.1642		CDK4	RAD23B	T155	NetworKIN	0.313471		CDK4	RAD23B	T155	NetworKIN	1.46419
		CDK4	PSMD1	T273	NetworKIN	-0.119107		CDK4	PSMD1	T273	NetworKIN	0.612823		CDK4	PSMD1	T273	NetworKIN	0.831272		CDK4	PSMD1	T273	NetworKIN	1.77765
		CDK4	EIF4EBP1	T46	NetworKIN	-0.936129		CDK4	EIF4EBP1	T46	NetworKIN	-0.391568		CDK4	EIF4EBP1	T46	NetworKIN	0.105494		CDK4	EIF4EBP1	T46	NetworKIN	0.125691
		CDK5	CDKN1B	S10	NetworKIN	-0.528298		CDK5	CDKN1B	S10	NetworKIN	-0.157325		CDK5	CDKN1B	S10	NetworKIN	-0.0046816		CDK5	CDKN1B	S10	NetworKIN	-0.180952
		CDK5	MAP1B	S1256	NetworKIN	-0.25409		CDK5	MAP1B	S1256	NetworKIN	0.106134		CDK5	MAP1B	S1256	NetworKIN	0.154528		CDK5	MAP1B	S1256	NetworKIN	0.00145506
		CDK5	MAP1B	S1260	NetworKIN	0.140396		CDK5	MAP1B	S1260	NetworKIN	0.0562297		CDK5	MAP1B	S1260	NetworKIN	0.124721		CDK5	MAP1B	S1260	NetworKIN	-0.132018
		CDK5	MAP1B	S1262	NetworKIN	0.454568		CDK5	MAP1B	S1262	NetworKIN	0.15554		CDK5	MAP1B	S1262	NetworKIN	0.342966		CDK5	MAP1B	S1262	NetworKIN	0.196901
		CDK5	MAP1B	S1265	NetworKIN	-0.231074		CDK5	MAP1B	S1265	NetworKIN	0.365886		CDK5	MAP1B	S1265	NetworKIN	0.245004		CDK5	MAP1B	S1265	NetworKIN	0.172535
		CDK5	MAP1B	S1389	NetworKIN	-1.2018		CDK5	MAP1B	S1389	NetworKIN	0.390225		CDK5	MAP1B	S1389	NetworKIN	-0.0347509		CDK5	MAP1B	S1389	NetworKIN	0.508869
		CDK5	MAP1B	S1396	NetworKIN	-0.126766		CDK5	MAP1B	S1396	NetworKIN	0.697487		CDK5	MAP1B	S1396	NetworKIN	0.375667		CDK5	MAP1B	S1396	NetworKIN	0.498846
		CDK5	MAP1B	S1400	NetworKIN	0.640696		CDK5	MAP1B	S1400	NetworKIN	0.425232		CDK5	MAP1B	S1400	NetworKIN	0.697381		CDK5	MAP1B	S1400	NetworKIN	0.547198
		CDK5	MAP1B	S1427	NetworKIN	-0.489078		CDK5	MAP1B	S1427	NetworKIN	0.42245		CDK5	MAP1B	S1427	NetworKIN	0.383606		CDK5	MAP1B	S1427	NetworKIN	0.149392
		CDK5	RTN4	S15	NetworKIN	-0.0309254		CDK5	RTN4	S15	NetworKIN	0.232249		CDK5	RTN4	S15	NetworKIN	0.295193		CDK5	RTN4	S15	NetworKIN	-0.0281171
		CDK5	KATNA1	S170	NetworKIN	-0.536841		CDK5	KATNA1	S170	NetworKIN	0.0859127		CDK5	KATNA1	S170	NetworKIN	0.076233		CDK5	KATNA1	S170	NetworKIN	0.18047
		CDK5	MAP1B	S1779	NetworKIN	-0.948941		CDK5	MAP1B	S1779	NetworKIN	0.580999		CDK5	MAP1B	S1779	NetworKIN	0.841979		CDK5	MAP1B	S1779	NetworKIN	0.0737492
		CDK5	CDKN1B	S178	NetworKIN	-0.765252		CDK5	CDKN1B	S178	NetworKIN	-0.0200448		CDK5	CDKN1B	S178	NetworKIN	0.141546		CDK5	CDKN1B	S178	NetworKIN	-0.289854
		CDK5	MAP1B	S1793	NetworKIN	0.769992		CDK5	MAP1B	S1793	NetworKIN	0.230411		CDK5	MAP1B	S1793	NetworKIN	0.530199		CDK5	MAP1B	S1793	NetworKIN	0.68928
		CDK5	MAP1B	S1797	NetworKIN	0.756087		CDK5	MAP1B	S1797	NetworKIN	0.254594		CDK5	MAP1B	S1797	NetworKIN	0.507344		CDK5	MAP1B	S1797	NetworKIN	0.693856
		CDK5	MAP1B	S1819	NetworKIN	-0.891206		CDK5	MAP1B	S1819	NetworKIN	0.226501		CDK5	MAP1B	S1819	NetworKIN	0.0934097		CDK5	MAP1B	S1819	NetworKIN	0.0175228
		CDK5	ABI1	S183	NetworKIN	-0.568127		CDK5	ABI1	S183	NetworKIN	0.191322		CDK5	ABI1	S183	NetworKIN	0.175026		CDK5	ABI1	S183	NetworKIN	0.0719195
		CDK5	STUB1	S19	NetworKIN	-0.478699		CDK5	STUB1	S19	NetworKIN	-0.0767845		CDK5	STUB1	S19	NetworKIN	0.036183		CDK5	STUB1	S19	NetworKIN	-0.558011
		CDK5	MAP1B	S1915	NetworKIN	-0.241206		CDK5	MAP1B	S1915	NetworKIN	0.052014		CDK5	MAP1B	S1915	NetworKIN	0.0933937		CDK5	MAP1B	S1915	NetworKIN	0.141555
		CDK5	SRFBP1	S203	NetworKIN	-0.558647		CDK5	SRFBP1	S203	NetworKIN	0.0387667		CDK5	SRFBP1	S203	NetworKIN	0.32365		CDK5	SRFBP1	S203	NetworKIN	-0.740704
		CDK5	DYNC1LI1	S207	NetworKIN	0.250333		CDK5	DYNC1LI1	S207	NetworKIN	0.403865		CDK5	DYNC1LI1	S207	NetworKIN	0.166757		CDK5	DYNC1LI1	S207	NetworKIN	1.27
		CDK5	ABI1	S225	NetworKIN	-0.724048		CDK5	ABI1	S225	NetworKIN	0.115765		CDK5	ABI1	S225	NetworKIN	0.169283		CDK5	ABI1	S225	NetworKIN	0.0243228
		CDK5	STUB1	S23	NetworKIN	-0.501083		CDK5	STUB1	S23	NetworKIN	-0.0468221		CDK5	STUB1	S23	NetworKIN	0.566963		CDK5	STUB1	S23	NetworKIN	-0.313821
		CDK5	CAST	S326	NetworKIN	-0.129117		CDK5	CAST	S326	NetworKIN	0.760398		CDK5	CAST	S326	NetworKIN	0.741491		CDK5	CAST	S326	NetworKIN	1.4325
		CDK5	CSNK1D	S356	NetworKIN	-0.51405		CDK5	CSNK1D	S356	NetworKIN	-0.0193089		CDK5	CSNK1D	S356	NetworKIN	0.444564		CDK5	CSNK1D	S356	NetworKIN	-0.169664
		CDK5	CAMK2B	S367	NetworKIN	0.669315		CDK5	CAMK2B	S367	NetworKIN	0.964214		CDK5	CAMK2B	S367	NetworKIN	0.279568		CDK5	CAMK2B	S367	NetworKIN	2.45751
		CDK5	TAOK1	S421	NetworKIN	-0.18339		CDK5	TAOK1	S421	NetworKIN	0.104857		CDK5	TAOK1	S421	NetworKIN	0.0129262		CDK5	TAOK1	S421	NetworKIN	0.217805
		CDK5	NES	S471	NetworKIN	0.22606		CDK5	NES	S471	NetworKIN	0.343726		CDK5	NES	S471	NetworKIN	0.541035		CDK5	NES	S471	NetworKIN	0.0265833
		CDK5	TLN2	S473	NetworKIN	-0.361014		CDK5	TLN2	S473	NetworKIN	0.158327		CDK5	TLN2	S473	NetworKIN	0.0787749		CDK5	TLN2	S473	NetworKIN	0.11544
		CDK5	DYNC1LI1	S516	NetworKIN	0.612647		CDK5	DYNC1LI1	S516	NetworKIN	2.10381		CDK5	DYNC1LI1	S516	NetworKIN	0.244713		CDK5	DYNC1LI1	S516	NetworKIN	0.910572
		CDK5	HDAC4	S633	NetworKIN	-0.218031		CDK5	HDAC4	S633	NetworKIN	0.378919		CDK5	HDAC4	S633	NetworKIN	0.194868		CDK5	HDAC4	S633	NetworKIN	-0.142645
		CDK5	NES	S680	NetworKIN	0.576015		CDK5	NES	S680	NetworKIN	0.466154		CDK5	NES	S680	NetworKIN	0.73391		CDK5	NES	S680	NetworKIN	0.0862037
		CDK5	KCNB1	S783	NetworKIN	0.0101976		CDK5	KCNB1	S783	NetworKIN	-0.012394		CDK5	KCNB1	S783	NetworKIN	0.719576		CDK5	KCNB1	S783	NetworKIN	0.00702084
		CDK5	TAOK1	S965	NetworKIN	-0.481127		CDK5	TAOK1	S965	NetworKIN	-0.130136		CDK5	TAOK1	S965	NetworKIN	0.169644		CDK5	TAOK1	S965	NetworKIN	-0.152023
		CDK5	CLIP1	T140	NetworKIN	-0.132782		CDK5	CLIP1	T140	NetworKIN	0.141952		CDK5	CLIP1	T140	NetworKIN	0.441652		CDK5	CLIP1	T140	NetworKIN	-0.19982
		CDK5	PAK2	T143	NetworKIN	-0.255329		CDK5	PAK2	T143	NetworKIN	0.258572		CDK5	PAK2	T143	NetworKIN	-0.0330861		CDK5	PAK2	T143	NetworKIN	-0.103647
		CDK5	CLIP1	T182	NetworKIN	-0.664763		CDK5	CLIP1	T182	NetworKIN	0.141083		CDK5	CLIP1	T182	NetworKIN	0.326972		CDK5	CLIP1	T182	NetworKIN	-0.048835
		CDK5	TLN2	T1843	NetworKIN	-0.491706		CDK5	TLN2	T1843	NetworKIN	0.1583		CDK5	TLN2	T1843	NetworKIN	0.134228		CDK5	TLN2	T1843	NetworKIN	-0.0702489
		CDK5	BIN1	T307	NetworKIN	-0.194792		CDK5	BIN1	T307	NetworKIN	0.334236		CDK5	BIN1	T307	NetworKIN	0.25781		CDK5	BIN1	T307	NetworKIN	0.116499
		CDK5	DYNC1LI1	T513	NetworKIN	0.00976005		CDK5	DYNC1LI1	T513	NetworKIN	1.19955		CDK5	DYNC1LI1	T513	NetworKIN	-0.111995		CDK5	DYNC1LI1	T513	NetworKIN	0.846057
		CDK6	NPM1	S125	NetworKIN	-0.535003		CDK6	NPM1	S125	NetworKIN	0.0958347		CDK6	NPM1	S125	NetworKIN	0.287683		CDK6	NPM1	S125	NetworKIN	-0.00869317
		CDK6	MCM2	S13	NetworKIN	0.195931		CDK6	MCM2	S13	NetworKIN	0.0810472		CDK6	MCM2	S13	NetworKIN	0.165028		CDK6	MCM2	S13	NetworKIN	-0.0159293
		CDK6	CDKN1B	S178	NetworKIN	-0.765252		CDK6	CDKN1B	S178	NetworKIN	-0.0200448		CDK6	CDKN1B	S178	NetworKIN	0.141546		CDK6	CDKN1B	S178	NetworKIN	-0.289854
		CDK6	SUMO1	S2	NetworKIN	-0.816545		CDK6	SUMO1	S2	NetworKIN	-0.0337032		CDK6	SUMO1	S2	NetworKIN	0.391683		CDK6	SUMO1	S2	NetworKIN	-0.317001
		CDK6	AFF1	S212	NetworKIN	-0.0780918		CDK6	AFF1	S212	NetworKIN	0.0351016		CDK6	AFF1	S212	NetworKIN	0.138168		CDK6	AFF1	S212	NetworKIN	0.0499056
		CDK6	CTNNB1	S552	NetworKIN	0.0103464		CDK6	CTNNB1	S552	NetworKIN	0.228096		CDK6	CTNNB1	S552	NetworKIN	0.158061		CDK6	CTNNB1	S552	NetworKIN	0.0525474
		CDK6	RBL2	S982	NetworKIN	-0.13832		CDK6	RBL2	S982	NetworKIN	0.108639		CDK6	RBL2	S982	NetworKIN	0.512845		CDK6	RBL2	S982	NetworKIN	0.159421
		CDK6	PRKAR2A	T104	NetworKIN	-0.076431		CDK6	PRKAR2A	T104	NetworKIN	-0.196348		CDK6	PRKAR2A	T104	NetworKIN	0.0190854		CDK6	PRKAR2A	T104	NetworKIN	-0.0991012
		CDK6	WDR77	T5	NetworKIN	-0.24283		CDK6	WDR77	T5	NetworKIN	0.0367463		CDK6	WDR77	T5	NetworKIN	0.119346		CDK6	WDR77	T5	NetworKIN	-0.0962994
		CDK6	CTNNB1	T551	NetworKIN	0.0248789		CDK6	CTNNB1	T551	NetworKIN	0.415619		CDK6	CTNNB1	T551	NetworKIN	0.105122		CDK6	CTNNB1	T551	NetworKIN	-0.0124792
		CDK7	CDKN1B	S10	NetworKIN	-0.528298		CDK7	CDKN1B	S10	NetworKIN	-0.157325		CDK7	CDKN1B	S10	NetworKIN	-0.0046816		CDK7	CDKN1B	S10	NetworKIN	-0.180952
		CDK7	TCEA1	S100	NetworKIN	-0.226995		CDK7	TCEA1	S100	NetworKIN	0.100738		CDK7	TCEA1	S100	NetworKIN	0.0623581		CDK7	TCEA1	S100	NetworKIN	0.0209023
		CDK7	CDC37	S13	NetworKIN	-0.285085		CDK7	CDC37	S13	NetworKIN	0.123287		CDK7	CDC37	S13	NetworKIN	0.432775		CDK7	CDC37	S13	NetworKIN	-0.12381
		CDK7	NCBP2	S13	NetworKIN	-0.165972		CDK7	NCBP2	S13	NetworKIN	0.435596		CDK7	NCBP2	S13	NetworKIN	0.233655		CDK7	NCBP2	S13	NetworKIN	0.0160392
		CDK7	RAD23B	S160	NetworKIN	0.52465		CDK7	RAD23B	S160	NetworKIN	1.13651		CDK7	RAD23B	S160	NetworKIN	0.297955		CDK7	RAD23B	S160	NetworKIN	1.72294
		CDK7	PTRF	S167	NetworKIN	-0.524395		CDK7	PTRF	S167	NetworKIN	0.542621		CDK7	PTRF	S167	NetworKIN	0.100118		CDK7	PTRF	S167	NetworKIN	-0.0162784
		CDK7	PTRF	S169	NetworKIN	-0.581647		CDK7	PTRF	S169	NetworKIN	0.529582		CDK7	PTRF	S169	NetworKIN	0.549154		CDK7	PTRF	S169	NetworKIN	-0.0282275
		CDK7	TAF7	S171	NetworKIN	0.0131584		CDK7	TAF7	S171	NetworKIN	0.726044		CDK7	TAF7	S171	NetworKIN	0.229248		CDK7	TAF7	S171	NetworKIN	0.238955
		CDK7	PTRF	S175	NetworKIN	-1.34121		CDK7	PTRF	S175	NetworKIN	0.266107		CDK7	PTRF	S175	NetworKIN	0.151587		CDK7	PTRF	S175	NetworKIN	0.0454915
		CDK7	CDKN1B	S178	NetworKIN	-0.765252		CDK7	CDKN1B	S178	NetworKIN	-0.0200448		CDK7	CDKN1B	S178	NetworKIN	0.141546		CDK7	CDKN1B	S178	NetworKIN	-0.289854
		CDK7	LEO1	S179	NetworKIN	-0.414459		CDK7	LEO1	S179	NetworKIN	-0.0104284		CDK7	LEO1	S179	NetworKIN	0.0170071		CDK7	LEO1	S179	NetworKIN	-0.223102
		CDK7	TAF3	S183	NetworKIN	-0.200535		CDK7	TAF3	S183	NetworKIN	0.23671		CDK7	TAF3	S183	NetworKIN	0.16878		CDK7	TAF3	S183	NetworKIN	0.211573
		CDK7	TAF7	S201	NetworKIN	-0.143714		CDK7	TAF7	S201	NetworKIN	0.029418		CDK7	TAF7	S201	NetworKIN	0.35099		CDK7	TAF7	S201	NetworKIN	0.133362
		CDK7	PTRF	S202	NetworKIN	-0.372603		CDK7	PTRF	S202	NetworKIN	0.352702		CDK7	PTRF	S202	NetworKIN	0.255949		CDK7	PTRF	S202	NetworKIN	0.0413826
		CDK7	PTRF	S203	NetworKIN	-0.72949		CDK7	PTRF	S203	NetworKIN	0.28709		CDK7	PTRF	S203	NetworKIN	0.212546		CDK7	PTRF	S203	NetworKIN	0.103515
		CDK7	LEO1	S205	NetworKIN	-0.530445		CDK7	LEO1	S205	NetworKIN	0.0510964		CDK7	LEO1	S205	NetworKIN	0.140625		CDK7	LEO1	S205	NetworKIN	-0.0941154
		CDK7	TAF7	S264	NetworKIN	-0.435357		CDK7	TAF7	S264	NetworKIN	0.196678		CDK7	TAF7	S264	NetworKIN	0.242112		CDK7	TAF7	S264	NetworKIN	0.106912
		CDK7	PTRF	S300	NetworKIN	-0.280368		CDK7	PTRF	S300	NetworKIN	0.313185		CDK7	PTRF	S300	NetworKIN	-0.0453327		CDK7	PTRF	S300	NetworKIN	-0.0458551
		CDK7	GTF2F1	S307	NetworKIN	-0.249161		CDK7	GTF2F1	S307	NetworKIN	-0.00086235		CDK7	GTF2F1	S307	NetworKIN	0.378685		CDK7	GTF2F1	S307	NetworKIN	0.0451874
		CDK7	CCNK	S324	NetworKIN	-0.23042		CDK7	CCNK	S324	NetworKIN	0.0945346		CDK7	CCNK	S324	NetworKIN	0.184538		CDK7	CCNK	S324	NetworKIN	0.00187927
		CDK7	CCNK	S328	NetworKIN	-0.307749		CDK7	CCNK	S328	NetworKIN	-0.030419		CDK7	CCNK	S328	NetworKIN	0.140294		CDK7	CCNK	S328	NetworKIN	0.0558887
		CDK7	CCNK	S329	NetworKIN	-0.105039		CDK7	CCNK	S329	NetworKIN	0.112446		CDK7	CCNK	S329	NetworKIN	0.268875		CDK7	CCNK	S329	NetworKIN	0.0477753
		CDK7	PTRF	S365	NetworKIN	-0.307911		CDK7	PTRF	S365	NetworKIN	0.08698		CDK7	PTRF	S365	NetworKIN	0.127474		CDK7	PTRF	S365	NetworKIN	-0.171256
		CDK7	PTRF	S366	NetworKIN	-0.62879		CDK7	PTRF	S366	NetworKIN	0.348107		CDK7	PTRF	S366	NetworKIN	0.311701		CDK7	PTRF	S366	NetworKIN	0.102724
		CDK7	PTRF	S379	NetworKIN	-0.564183		CDK7	PTRF	S379	NetworKIN	0.428811		CDK7	PTRF	S379	NetworKIN	0.15545		CDK7	PTRF	S379	NetworKIN	0.198573
		CDK7	CCNT2	S601	NetworKIN	-0.10567		CDK7	CCNT2	S601	NetworKIN	0.146518		CDK7	CCNT2	S601	NetworKIN	0.676821		CDK7	CCNT2	S601	NetworKIN	0.141567
		CDK7	CTR9	S970	NetworKIN	-0.269157		CDK7	CTR9	S970	NetworKIN	0.473199		CDK7	CTR9	S970	NetworKIN	0.651773		CDK7	CTR9	S970	NetworKIN	-0.206744
		CDK7	RAD23B	T155	NetworKIN	0.290434		CDK7	RAD23B	T155	NetworKIN	1.1642		CDK7	RAD23B	T155	NetworKIN	0.313471		CDK7	RAD23B	T155	NetworKIN	1.46419
		CDK7	POLR2A	T1919	NetworKIN	-0.31354		CDK7	POLR2A	T1919	NetworKIN	0.241121		CDK7	POLR2A	T1919	NetworKIN	0.324729		CDK7	POLR2A	T1919	NetworKIN	-0.0121591
		CDK7	PTRF	T302	NetworKIN	-0.552625		CDK7	PTRF	T302	NetworKIN	0.129993		CDK7	PTRF	T302	NetworKIN	-0.34209		CDK7	PTRF	T302	NetworKIN	0.0137855
		CDK7	TAF3	T339	NetworKIN	-0.17972		CDK7	TAF3	T339	NetworKIN	0.0302257		CDK7	TAF3	T339	NetworKIN	0.131945		CDK7	TAF3	T339	NetworKIN	-0.0980797
		CDK7	PTRF	T376	NetworKIN	-0.497867		CDK7	PTRF	T376	NetworKIN	0.297398		CDK7	PTRF	T376	NetworKIN	0.427882		CDK7	PTRF	T376	NetworKIN	-0.0533161
		CDK7	LASP1	T68	NetworKIN	-1.61234		CDK7	LASP1	T68	NetworKIN	-0.774579		CDK7	LASP1	T68	NetworKIN	-0.0638404		CDK7	LASP1	T68	NetworKIN	-0.147522
		CDK7	CTR9	T925	NetworKIN	-0.432408		CDK7	CTR9	T925	NetworKIN	0.142768		CDK7	CTR9	T925	NetworKIN	0.36963		CDK7	CTR9	T925	NetworKIN	-0.0750275
		CHUK	IRS1	S1078	NetworKIN	-0.388847		CHUK	IRS1	S1078	NetworKIN	-0.342383		CHUK	IRS1	S1078	NetworKIN	0.0418062		CHUK	IRS1	S1078	NetworKIN	-0.156188
		CHUK	IRS1	S1100	NetworKIN	0.124628		CHUK	IRS1	S1100	NetworKIN	0.142147		CHUK	IRS1	S1100	NetworKIN	-0.489783		CHUK	IRS1	S1100	NetworKIN	-0.178021
		CHUK	IRS1	S1101	NetworKIN	-0.436822		CHUK	IRS1	S1101	NetworKIN	-0.460267		CHUK	IRS1	S1101	NetworKIN	0.223994		CHUK	IRS1	S1101	NetworKIN	0.132442
		CHUK	IRS1	S1222	NetworKIN	-0.550182		CHUK	IRS1	S1222	NetworKIN	0.0800258		CHUK	IRS1	S1222	NetworKIN	-0.124302		CHUK	IRS1	S1222	NetworKIN	0.000435909
		CHUK	CDC37	S13	NetworKIN	-0.285085		CHUK	CDC37	S13	NetworKIN	0.123287		CHUK	CDC37	S13	NetworKIN	0.432775		CHUK	CDC37	S13	NetworKIN	-0.12381
		CHUK	NCOR2	S149	NetworKIN	-0.218877		CHUK	NCOR2	S149	NetworKIN	0.0796474		CHUK	NCOR2	S149	NetworKIN	0.0575529		CHUK	NCOR2	S149	NetworKIN	-0.147221
		CHUK	HSPB1	S15	NetworKIN	1.34119		CHUK	HSPB1	S15	NetworKIN	1.87711		CHUK	HSPB1	S15	NetworKIN	-0.573784		CHUK	HSPB1	S15	NetworKIN	1.55372
		CHUK	MAVS	S152	NetworKIN	0.222677		CHUK	MAVS	S152	NetworKIN	0.867421		CHUK	MAVS	S152	NetworKIN	0.0614832		CHUK	MAVS	S152	NetworKIN	0.880287
		CHUK	NCOR2	S152	NetworKIN	-0.223786		CHUK	NCOR2	S152	NetworKIN	0.10348		CHUK	NCOR2	S152	NetworKIN	0.100377		CHUK	NCOR2	S152	NetworKIN	-0.126666
		CHUK	MAVS	S165	NetworKIN	0.0369255		CHUK	MAVS	S165	NetworKIN	0.376449		CHUK	MAVS	S165	NetworKIN	-0.0258897		CHUK	MAVS	S165	NetworKIN	0.135331
		CHUK	ERC1	S17	NetworKIN	-1.08704		CHUK	ERC1	S17	NetworKIN	-0.0175971		CHUK	ERC1	S17	NetworKIN	0.170902		CHUK	ERC1	S17	NetworKIN	0.0213971
		CHUK	SRC	S17	NetworKIN	-0.963667		CHUK	SRC	S17	NetworKIN	0.12108		CHUK	SRC	S17	NetworKIN	-0.415743		CHUK	SRC	S17	NetworKIN	-0.00328094
		CHUK	HSPB1	S199	NetworKIN	-0.567885		CHUK	HSPB1	S199	NetworKIN	0.101556		CHUK	HSPB1	S199	NetworKIN	0.201722		CHUK	HSPB1	S199	NetworKIN	0.380848
		CHUK	ERC1	S21	NetworKIN	-0.719635		CHUK	ERC1	S21	NetworKIN	-0.218379		CHUK	ERC1	S21	NetworKIN	0.00850111		CHUK	ERC1	S21	NetworKIN	-0.0455032
		CHUK	MAVS	S222	NetworKIN	-0.160477		CHUK	MAVS	S222	NetworKIN	0.558133		CHUK	MAVS	S222	NetworKIN	-0.0458663		CHUK	MAVS	S222	NetworKIN	1.12766
		CHUK	PRKCA	S226	NetworKIN	-0.366373		CHUK	PRKCA	S226	NetworKIN	0.287196		CHUK	PRKCA	S226	NetworKIN	0.302473		CHUK	PRKCA	S226	NetworKIN	0.144232
		CHUK	FOXO3	S253	NetworKIN	-0.0652574		CHUK	FOXO3	S253	NetworKIN	-0.250179		CHUK	FOXO3	S253	NetworKIN	0.573233		CHUK	FOXO3	S253	NetworKIN	0.244162
		CHUK	MAVS	S253	NetworKIN	-0.117502		CHUK	MAVS	S253	NetworKIN	0.271539		CHUK	MAVS	S253	NetworKIN	-0.236466		CHUK	MAVS	S253	NetworKIN	-0.279517
		CHUK	IRS1	S270	NetworKIN	-0.202046		CHUK	IRS1	S270	NetworKIN	-0.191829		CHUK	IRS1	S270	NetworKIN	-0.130835		CHUK	IRS1	S270	NetworKIN	0.060301
		CHUK	SQSTM1	S272	NetworKIN	-0.11742		CHUK	SQSTM1	S272	NetworKIN	0.361298		CHUK	SQSTM1	S272	NetworKIN	0.218637		CHUK	SQSTM1	S272	NetworKIN	0.515269
		CHUK	SQSTM1	S275	NetworKIN	-0.350336		CHUK	SQSTM1	S275	NetworKIN	-0.0351099		CHUK	SQSTM1	S275	NetworKIN	0.338131		CHUK	SQSTM1	S275	NetworKIN	0.0749271
		CHUK	SQSTM1	S276	NetworKIN	-0.545251		CHUK	SQSTM1	S276	NetworKIN	0.146127		CHUK	SQSTM1	S276	NetworKIN	0.458734		CHUK	SQSTM1	S276	NetworKIN	0.25006
		CHUK	SQSTM1	S277	NetworKIN	-0.431583		CHUK	SQSTM1	S277	NetworKIN	-0.325884		CHUK	SQSTM1	S277	NetworKIN	0.855287		CHUK	SQSTM1	S277	NetworKIN	-0.151042
		CHUK	IRS1	S3	NetworKIN	-0.20939		CHUK	IRS1	S3	NetworKIN	-0.130666		CHUK	IRS1	S3	NetworKIN	-0.0778996		CHUK	IRS1	S3	NetworKIN	0.0320856
		CHUK	IRS2	S306	NetworKIN	-0.540501		CHUK	IRS2	S306	NetworKIN	-0.024748		CHUK	IRS2	S306	NetworKIN	0.333409		CHUK	IRS2	S306	NetworKIN	0.212404
		CHUK	IRS1	S307	NetworKIN	-0.0764391		CHUK	IRS1	S307	NetworKIN	0.104714		CHUK	IRS1	S307	NetworKIN	0.315593		CHUK	IRS1	S307	NetworKIN	0.0779247
		CHUK	IRS1	S312	NetworKIN	-0.517916		CHUK	IRS1	S312	NetworKIN	0.0484965		CHUK	IRS1	S312	NetworKIN	0.353662		CHUK	IRS1	S312	NetworKIN	0.348236
		CHUK	PRKCA	S319	NetworKIN	0.305493		CHUK	PRKCA	S319	NetworKIN	0.672694		CHUK	PRKCA	S319	NetworKIN	0.100497		CHUK	PRKCA	S319	NetworKIN	1.36503
		CHUK	IRS1	S323	NetworKIN	-0.558861		CHUK	IRS1	S323	NetworKIN	-0.104917		CHUK	IRS1	S323	NetworKIN	0.297566		CHUK	IRS1	S323	NetworKIN	0.0827386
		CHUK	IRS1	S330	NetworKIN	-0.0270253		CHUK	IRS1	S330	NetworKIN	0.221561		CHUK	IRS1	S330	NetworKIN	-0.141524		CHUK	IRS1	S330	NetworKIN	0.330103
		CHUK	SQSTM1	S332	NetworKIN	-0.380297		CHUK	SQSTM1	S332	NetworKIN	0.0682189		CHUK	SQSTM1	S332	NetworKIN	0.172952		CHUK	SQSTM1	S332	NetworKIN	0.0141704
		CHUK	IRS1	S337	NetworKIN	-0.0672215		CHUK	IRS1	S337	NetworKIN	-0.317853		CHUK	IRS1	S337	NetworKIN	-0.125926		CHUK	IRS1	S337	NetworKIN	-0.127212
		CHUK	PRKCE	S337	NetworKIN	-0.40447		CHUK	PRKCE	S337	NetworKIN	0.774299		CHUK	PRKCE	S337	NetworKIN	0.0879153		CHUK	PRKCE	S337	NetworKIN	0.0835642
		CHUK	IRS1	S341	NetworKIN	-0.0864353		CHUK	IRS1	S341	NetworKIN	-0.287902		CHUK	IRS1	S341	NetworKIN	0.111322		CHUK	IRS1	S341	NetworKIN	-0.0952166
		CHUK	IRS1	S348	NetworKIN	-0.186318		CHUK	IRS1	S348	NetworKIN	-0.0961616		CHUK	IRS1	S348	NetworKIN	0.101395		CHUK	IRS1	S348	NetworKIN	-0.0400865
		CHUK	SQSTM1	S361	NetworKIN	-0.526525		CHUK	SQSTM1	S361	NetworKIN	0.453454		CHUK	SQSTM1	S361	NetworKIN	0.223644		CHUK	SQSTM1	S361	NetworKIN	0.0207315
		CHUK	SQSTM1	S365	NetworKIN	-0.775327		CHUK	SQSTM1	S365	NetworKIN	0.584134		CHUK	SQSTM1	S365	NetworKIN	0.53987		CHUK	SQSTM1	S365	NetworKIN	0.138333
		CHUK	SQSTM1	S366	NetworKIN	-0.777656		CHUK	SQSTM1	S366	NetworKIN	0.30809		CHUK	SQSTM1	S366	NetworKIN	0.292273		CHUK	SQSTM1	S366	NetworKIN	-0.168316
		CHUK	PRKCE	S368	NetworKIN	0.326971		CHUK	PRKCE	S368	NetworKIN	1.48311		CHUK	PRKCE	S368	NetworKIN	0.640517		CHUK	PRKCE	S368	NetworKIN	0.191239
		CHUK	IRS1	S374	NetworKIN	0.0376267		CHUK	IRS1	S374	NetworKIN	0.213023		CHUK	IRS1	S374	NetworKIN	0.018038		CHUK	IRS1	S374	NetworKIN	0.0274635
		CHUK	FOXO3	S425	NetworKIN	0.0562367		CHUK	FOXO3	S425	NetworKIN	0.370337		CHUK	FOXO3	S425	NetworKIN	-0.0204672		CHUK	FOXO3	S425	NetworKIN	0.683467
		CHUK	AKT2	S474	NetworKIN	-0.218463		CHUK	AKT2	S474	NetworKIN	-0.0712267		CHUK	AKT2	S474	NetworKIN	0.148073		CHUK	AKT2	S474	NetworKIN	0.0791953
		CHUK	PIAS1	S503	NetworKIN	0.263479		CHUK	PIAS1	S503	NetworKIN	0.0939109		CHUK	PIAS1	S503	NetworKIN	-0.03973		CHUK	PIAS1	S503	NetworKIN	0.0460049
		CHUK	PEBP1	S52	NetworKIN	-0.213757		CHUK	PEBP1	S52	NetworKIN	0.322299		CHUK	PEBP1	S52	NetworKIN	0.489625		CHUK	PEBP1	S52	NetworKIN	0.165104
		CHUK	IRS1	S527	NetworKIN	-0.352686		CHUK	IRS1	S527	NetworKIN	-0.281124		CHUK	IRS1	S527	NetworKIN	0.150522		CHUK	IRS1	S527	NetworKIN	0.123649
		CHUK	IRS1	S531	NetworKIN	-0.506915		CHUK	IRS1	S531	NetworKIN	-0.328371		CHUK	IRS1	S531	NetworKIN	0.200626		CHUK	IRS1	S531	NetworKIN	-0.0269413
		CHUK	CTNNB1	S552	NetworKIN	0.0103464		CHUK	CTNNB1	S552	NetworKIN	0.228096		CHUK	CTNNB1	S552	NetworKIN	0.158061		CHUK	CTNNB1	S552	NetworKIN	0.0525474
		CHUK	IRS2	S560	NetworKIN	-0.170712		CHUK	IRS2	S560	NetworKIN	0.162723		CHUK	IRS2	S560	NetworKIN	0.0504492		CHUK	IRS2	S560	NetworKIN	0.277245
		CHUK	HSPB1	S65	NetworKIN	-0.282196		CHUK	HSPB1	S65	NetworKIN	1.19051		CHUK	HSPB1	S65	NetworKIN	0.130473		CHUK	HSPB1	S65	NetworKIN	0.87668
		CHUK	PRKCE	S729	NetworKIN	0.115593		CHUK	PRKCE	S729	NetworKIN	0.169051		CHUK	PRKCE	S729	NetworKIN	0.63326		CHUK	PRKCE	S729	NetworKIN	0.0836982
		CHUK	JUN	S73	NetworKIN	0.571589		CHUK	JUN	S73	NetworKIN	0.577378		CHUK	JUN	S73	NetworKIN	0.174698		CHUK	JUN	S73	NetworKIN	0.828948
		CHUK	HSPB1	S82	NetworKIN	0.883518		CHUK	HSPB1	S82	NetworKIN	1.25016		CHUK	HSPB1	S82	NetworKIN	-0.267891		CHUK	HSPB1	S82	NetworKIN	1.14434
		CHUK	HSPB1	S83	NetworKIN	1.07049		CHUK	HSPB1	S83	NetworKIN	1.08315		CHUK	HSPB1	S83	NetworKIN	-0.481017		CHUK	HSPB1	S83	NetworKIN	0.912212
		CHUK	HSPB1	S86	NetworKIN	0.596729		CHUK	HSPB1	S86	NetworKIN	0.813461		CHUK	HSPB1	S86	NetworKIN	-0.046395		CHUK	HSPB1	S86	NetworKIN	0.578559
		CHUK	HSPB1	S98	NetworKIN	-0.418407		CHUK	HSPB1	S98	NetworKIN	0.301862		CHUK	HSPB1	S98	NetworKIN	0.199557		CHUK	HSPB1	S98	NetworKIN	0.152832
		CLK1	SRRM2	S1083	NetworKIN	-0.148088		CLK1	SRRM2	S1083	NetworKIN	0.0465656		CLK1	SRRM2	S1083	NetworKIN	0.130389		CLK1	SRRM2	S1083	NetworKIN	-0.171755
		CLK1	SRRM2	S1101	NetworKIN	-0.268351		CLK1	SRRM2	S1101	NetworKIN	-0.0847799		CLK1	SRRM2	S1101	NetworKIN	0.0838235		CLK1	SRRM2	S1101	NetworKIN	-0.202119
		CLK1	SRRM2	S1102	NetworKIN	-0.246896		CLK1	SRRM2	S1102	NetworKIN	0.341919		CLK1	SRRM2	S1102	NetworKIN	0.213256		CLK1	SRRM2	S1102	NetworKIN	0.230281
		CLK1	SRRM2	S1103	NetworKIN	-0.20543		CLK1	SRRM2	S1103	NetworKIN	-0.0301453		CLK1	SRRM2	S1103	NetworKIN	0.032544		CLK1	SRRM2	S1103	NetworKIN	-0.110259
		CLK1	SRRM2	S1132	NetworKIN	-0.00999798		CLK1	SRRM2	S1132	NetworKIN	0.145407		CLK1	SRRM2	S1132	NetworKIN	-0.111592		CLK1	SRRM2	S1132	NetworKIN	-0.125568
		CLK1	SRRM2	S1179	NetworKIN	0.0161369		CLK1	SRRM2	S1179	NetworKIN	0.0748912		CLK1	SRRM2	S1179	NetworKIN	0.0846751		CLK1	SRRM2	S1179	NetworKIN	0.0142344
		CLK1	SRRM2	S1219	NetworKIN	-0.214272		CLK1	SRRM2	S1219	NetworKIN	0.300965		CLK1	SRRM2	S1219	NetworKIN	0.216941		CLK1	SRRM2	S1219	NetworKIN	-0.0540013
		CLK1	SRRM2	S1320	NetworKIN	-0.0104368		CLK1	SRRM2	S1320	NetworKIN	0.0822963		CLK1	SRRM2	S1320	NetworKIN	-0.023997		CLK1	SRRM2	S1320	NetworKIN	-0.0935147
		CLK1	RBM39	S136	NetworKIN	-0.350426		CLK1	RBM39	S136	NetworKIN	0.168677		CLK1	RBM39	S136	NetworKIN	0.246078		CLK1	RBM39	S136	NetworKIN	-0.031416
		CLK1	SRRM2	S1387	NetworKIN	-0.627059		CLK1	SRRM2	S1387	NetworKIN	-0.0141435		CLK1	SRRM2	S1387	NetworKIN	0.0297056		CLK1	SRRM2	S1387	NetworKIN	-0.0167522
		CLK1	SRRM2	S1444	NetworKIN	-0.740061		CLK1	SRRM2	S1444	NetworKIN	-0.315705		CLK1	SRRM2	S1444	NetworKIN	-0.0400735		CLK1	SRRM2	S1444	NetworKIN	-0.646583
		CLK1	SRRM2	S1463	NetworKIN	-0.478046		CLK1	SRRM2	S1463	NetworKIN	0.13181		CLK1	SRRM2	S1463	NetworKIN	0.0957622		CLK1	SRRM2	S1463	NetworKIN	-0.0329123
		CLK1	MBP	S153	NetworKIN	-0.193926		CLK1	MBP	S153	NetworKIN	0.423331		CLK1	MBP	S153	NetworKIN	-0.278024		CLK1	MBP	S153	NetworKIN	-0.11852
		CLK1	SRRM2	S1690	NetworKIN	0.235969		CLK1	SRRM2	S1690	NetworKIN	0.431382		CLK1	SRRM2	S1690	NetworKIN	-0.232013		CLK1	SRRM2	S1690	NetworKIN	0.101571
		CLK1	SRRM2	S1691	NetworKIN	0.417102		CLK1	SRRM2	S1691	NetworKIN	0.609747		CLK1	SRRM2	S1691	NetworKIN	-0.16484		CLK1	SRRM2	S1691	NetworKIN	0.167421
		CLK1	SRRM2	S1693	NetworKIN	-0.180152		CLK1	SRRM2	S1693	NetworKIN	0.105644		CLK1	SRRM2	S1693	NetworKIN	0.208933		CLK1	SRRM2	S1693	NetworKIN	-0.105961
		CLK1	BCLAF1	S177	NetworKIN	-0.533155		CLK1	BCLAF1	S177	NetworKIN	0.0622513		CLK1	BCLAF1	S177	NetworKIN	0.342672		CLK1	BCLAF1	S177	NetworKIN	-0.186704
		CLK1	MBP	S205	NetworKIN	-0.47847		CLK1	MBP	S205	NetworKIN	0.322056		CLK1	MBP	S205	NetworKIN	0.200129		CLK1	MBP	S205	NetworKIN	0.221698
		CLK1	SRRM2	S2132	NetworKIN	-0.142947		CLK1	SRRM2	S2132	NetworKIN	0.368316		CLK1	SRRM2	S2132	NetworKIN	0.286965		CLK1	SRRM2	S2132	NetworKIN	0.166628
		CLK1	SRRM2	S2398	NetworKIN	-0.207682		CLK1	SRRM2	S2398	NetworKIN	0.353496		CLK1	SRRM2	S2398	NetworKIN	-0.0464463		CLK1	SRRM2	S2398	NetworKIN	-0.00237749
		CLK1	SRRM2	S2581	NetworKIN	-0.191804		CLK1	SRRM2	S2581	NetworKIN	0.0275197		CLK1	SRRM2	S2581	NetworKIN	0.0717068		CLK1	SRRM2	S2581	NetworKIN	-0.0638586
		CLK1	SON	S283	NetworKIN	-0.145524		CLK1	SON	S283	NetworKIN	0.249269		CLK1	SON	S283	NetworKIN	0.428259		CLK1	SON	S283	NetworKIN	0.111612
		CLK1	BCLAF1	S285	NetworKIN	-0.226846		CLK1	BCLAF1	S285	NetworKIN	0.0830291		CLK1	BCLAF1	S285	NetworKIN	0.169602		CLK1	BCLAF1	S285	NetworKIN	-0.0132322
		CLK1	BCLAF1	S287	NetworKIN	-0.34762		CLK1	BCLAF1	S287	NetworKIN	0.0558982		CLK1	BCLAF1	S287	NetworKIN	0.257528		CLK1	BCLAF1	S287	NetworKIN	0.220317
		CLK1	BCLAF1	S290	NetworKIN	-0.190557		CLK1	BCLAF1	S290	NetworKIN	0.0986025		CLK1	BCLAF1	S290	NetworKIN	0.0828602		CLK1	BCLAF1	S290	NetworKIN	-0.00875629
		CLK1	SRRM2	S295	NetworKIN	-0.00590096		CLK1	SRRM2	S295	NetworKIN	-0.0278246		CLK1	SRRM2	S295	NetworKIN	0.0718318		CLK1	SRRM2	S295	NetworKIN	-0.0158708
		CLK1	BCLAF1	S297	NetworKIN	-0.363521		CLK1	BCLAF1	S297	NetworKIN	-0.017846		CLK1	BCLAF1	S297	NetworKIN	0.0982152		CLK1	BCLAF1	S297	NetworKIN	-0.0554437
		CLK1	SRRM2	S297	NetworKIN	-0.0203228		CLK1	SRRM2	S297	NetworKIN	-0.014078		CLK1	SRRM2	S297	NetworKIN	0.0713293		CLK1	SRRM2	S297	NetworKIN	0.0137311
		CLK1	RSRC2	S32	NetworKIN	-0.0179891		CLK1	RSRC2	S32	NetworKIN	0.0283269		CLK1	RSRC2	S32	NetworKIN	-0.016537		CLK1	RSRC2	S32	NetworKIN	-0.0587033
		CLK1	SRRM2	S323	NetworKIN	-0.223811		CLK1	SRRM2	S323	NetworKIN	0.055134		CLK1	SRRM2	S323	NetworKIN	0.105936		CLK1	SRRM2	S323	NetworKIN	-0.121766
		CLK1	SRRM2	S377	NetworKIN	-0.209461		CLK1	SRRM2	S377	NetworKIN	0.0140602		CLK1	SRRM2	S377	NetworKIN	0.0916844		CLK1	SRRM2	S377	NetworKIN	-0.10266
		CLK1	SRRM2	S398	NetworKIN	-0.191225		CLK1	SRRM2	S398	NetworKIN	0.00487065		CLK1	SRRM2	S398	NetworKIN	0.106403		CLK1	SRRM2	S398	NetworKIN	-0.0427323
		CLK1	SRRM2	S404	NetworKIN	-0.670452		CLK1	SRRM2	S404	NetworKIN	0.11816		CLK1	SRRM2	S404	NetworKIN	0.616316		CLK1	SRRM2	S404	NetworKIN	-0.325293
		CLK1	SRRM2	S408	NetworKIN	-0.689126		CLK1	SRRM2	S408	NetworKIN	0.133379		CLK1	SRRM2	S408	NetworKIN	0.639763		CLK1	SRRM2	S408	NetworKIN	-0.327996
		CLK1	PPIG	S413	NetworKIN	-0.248377		CLK1	PPIG	S413	NetworKIN	0.480192		CLK1	PPIG	S413	NetworKIN	0.197927		CLK1	PPIG	S413	NetworKIN	-0.0317953
		CLK1	PPIG	S415	NetworKIN	-0.178552		CLK1	PPIG	S415	NetworKIN	0.285513		CLK1	PPIG	S415	NetworKIN	0.179429		CLK1	PPIG	S415	NetworKIN	-0.0951225
		CLK1	BCLAF1	S496	NetworKIN	-0.418474		CLK1	BCLAF1	S496	NetworKIN	0.0209904		CLK1	BCLAF1	S496	NetworKIN	0.172791		CLK1	BCLAF1	S496	NetworKIN	-0.232134
		CLK1	BCLAF1	S512	NetworKIN	-0.29861		CLK1	BCLAF1	S512	NetworKIN	0.210721		CLK1	BCLAF1	S512	NetworKIN	0.199441		CLK1	BCLAF1	S512	NetworKIN	-0.0390072
		CLK1	BCLAF1	S531	NetworKIN	-0.12976		CLK1	BCLAF1	S531	NetworKIN	0.0325902		CLK1	BCLAF1	S531	NetworKIN	0.0627475		CLK1	BCLAF1	S531	NetworKIN	-0.0423049
		CLK1	BCLAF1	S648	NetworKIN	-0.123323		CLK1	BCLAF1	S648	NetworKIN	0.132971		CLK1	BCLAF1	S648	NetworKIN	0.253085		CLK1	BCLAF1	S648	NetworKIN	-0.127711
		CLK1	BCLAF1	S658	NetworKIN	-0.0418552		CLK1	BCLAF1	S658	NetworKIN	0.124917		CLK1	BCLAF1	S658	NetworKIN	0.0294785		CLK1	BCLAF1	S658	NetworKIN	-0.0371315
		CLK1	BCLAF1	S660	NetworKIN	-0.120494		CLK1	BCLAF1	S660	NetworKIN	0.293439		CLK1	BCLAF1	S660	NetworKIN	0.326104		CLK1	BCLAF1	S660	NetworKIN	0.313162
		CLK1	PPIG	S687	NetworKIN	-0.422687		CLK1	PPIG	S687	NetworKIN	0.0803452		CLK1	PPIG	S687	NetworKIN	0.111548		CLK1	PPIG	S687	NetworKIN	-0.147362
		CLK1	PPIG	S717	NetworKIN	-0.146566		CLK1	PPIG	S717	NetworKIN	0.0959128		CLK1	PPIG	S717	NetworKIN	0.115461		CLK1	PPIG	S717	NetworKIN	-0.177541
		CLK1	SRRM2	S854	NetworKIN	-0.234153		CLK1	SRRM2	S854	NetworKIN	-0.0878313		CLK1	SRRM2	S854	NetworKIN	-0.0227258		CLK1	SRRM2	S854	NetworKIN	-0.166946
		CLK1	SRRM2	S864	NetworKIN	-0.337826		CLK1	SRRM2	S864	NetworKIN	0.167375		CLK1	SRRM2	S864	NetworKIN	0.190861		CLK1	SRRM2	S864	NetworKIN	0.0930722
		CLK1	SRRM2	S876	NetworKIN	-0.423388		CLK1	SRRM2	S876	NetworKIN	0.18276		CLK1	SRRM2	S876	NetworKIN	0.298014		CLK1	SRRM2	S876	NetworKIN	0.0609161
		CLK1	SRRM2	S914	NetworKIN	-0.0467566		CLK1	SRRM2	S914	NetworKIN	0.266851		CLK1	SRRM2	S914	NetworKIN	0.0671774		CLK1	SRRM2	S914	NetworKIN	0.101363
		CLK1	RBM39	S97	NetworKIN	-0.368298		CLK1	RBM39	S97	NetworKIN	-0.0287137		CLK1	RBM39	S97	NetworKIN	0.144205		CLK1	RBM39	S97	NetworKIN	-0.142837
		CLK1	SRRM2	S973	NetworKIN	0.200273		CLK1	SRRM2	S973	NetworKIN	-0.0770296		CLK1	SRRM2	S973	NetworKIN	0.070007		CLK1	SRRM2	S973	NetworKIN	0.0849416
		CLK1	SRRM2	S974	NetworKIN	-0.00053188		CLK1	SRRM2	S974	NetworKIN	0.0322243		CLK1	SRRM2	S974	NetworKIN	0.314505		CLK1	SRRM2	S974	NetworKIN	-0.147283
		CLK1	SRRM2	S994	NetworKIN	-0.0807825		CLK1	SRRM2	S994	NetworKIN	0.108441		CLK1	SRRM2	S994	NetworKIN	0.213364		CLK1	SRRM2	S994	NetworKIN	-0.0297905
		CLK1	SRRM2	T1003	NetworKIN	-0.250603		CLK1	SRRM2	T1003	NetworKIN	0.0788681		CLK1	SRRM2	T1003	NetworKIN	0.124805		CLK1	SRRM2	T1003	NetworKIN	-0.0964928
		CLK1	SRRM2	T1043	NetworKIN	-0.273078		CLK1	SRRM2	T1043	NetworKIN	0.112559		CLK1	SRRM2	T1043	NetworKIN	0.582121		CLK1	SRRM2	T1043	NetworKIN	-0.129784
		CLK1	SRRM2	T1492	NetworKIN	0.0731694		CLK1	SRRM2	T1492	NetworKIN	0.0635836		CLK1	SRRM2	T1492	NetworKIN	0.0584991		CLK1	SRRM2	T1492	NetworKIN	-0.0231521
		CLK1	SRRM2	T2397	NetworKIN	-0.235644		CLK1	SRRM2	T2397	NetworKIN	0.172894		CLK1	SRRM2	T2397	NetworKIN	0.123495		CLK1	SRRM2	T2397	NetworKIN	0.014103
		CLK1	SRRM2	T384	NetworKIN	-0.216222		CLK1	SRRM2	T384	NetworKIN	0.0806646		CLK1	SRRM2	T384	NetworKIN	0.0122689		CLK1	SRRM2	T384	NetworKIN	0.0470003
		CLK1	BCLAF1	T494	NetworKIN	-0.454129		CLK1	BCLAF1	T494	NetworKIN	-0.0934769		CLK1	BCLAF1	T494	NetworKIN	0.232153		CLK1	BCLAF1	T494	NetworKIN	0.00461736
		CLK1	SRRM2	T866	NetworKIN	-0.233633		CLK1	SRRM2	T866	NetworKIN	0.00903057		CLK1	SRRM2	T866	NetworKIN	0.0893169		CLK1	SRRM2	T866	NetworKIN	-0.185852
		CSF1R	NPM1	Y67	NetworKIN	-0.178501		CSF1R	NPM1	Y67	NetworKIN	0.071562		CSF1R	NPM1	Y67	NetworKIN	0.376511		CSF1R	NPM1	Y67	NetworKIN	-0.228698
		CSNK1A1	MED1	S1021	NetworKIN	-0.252924		CSNK1A1	MED1	S1021	NetworKIN	0.10725		CSNK1A1	MED1	S1021	NetworKIN	-0.133943		CSNK1A1	MED1	S1021	NetworKIN	-0.148017
		CSNK1A1	ROCK1	S1105	NetworKIN	-0.281855		CSNK1A1	ROCK1	S1105	NetworKIN	0.593978		CSNK1A1	ROCK1	S1105	NetworKIN	0.244774		CSNK1A1	ROCK1	S1105	NetworKIN	0.086851
		CSNK1A1	RANBP2	S1160	NetworKIN	-0.584612		CSNK1A1	RANBP2	S1160	NetworKIN	0.0547332		CSNK1A1	RANBP2	S1160	NetworKIN	0.117841		CSNK1A1	RANBP2	S1160	NetworKIN	-0.194906
		CSNK1A1	TP53BP1	S1221	NetworKIN	-0.291107		CSNK1A1	TP53BP1	S1221	NetworKIN	0.152675		CSNK1A1	TP53BP1	S1221	NetworKIN	0.232612		CSNK1A1	TP53BP1	S1221	NetworKIN	-0.240301
		CSNK1A1	IRS1	S1222	NetworKIN	-0.550182		CSNK1A1	IRS1	S1222	NetworKIN	0.0800258		CSNK1A1	IRS1	S1222	NetworKIN	-0.124302		CSNK1A1	IRS1	S1222	NetworKIN	0.000435909
		CSNK1A1	TP53BP1	S1224	NetworKIN	-0.296648		CSNK1A1	TP53BP1	S1224	NetworKIN	0.0950661		CSNK1A1	TP53BP1	S1224	NetworKIN	0.199023		CSNK1A1	TP53BP1	S1224	NetworKIN	-0.310979
		CSNK1A1	NPM1	S125	NetworKIN	-0.535003		CSNK1A1	NPM1	S125	NetworKIN	0.0958347		CSNK1A1	NPM1	S125	NetworKIN	0.287683		CSNK1A1	NPM1	S125	NetworKIN	-0.00869317
		CSNK1A1	NES	S1286	NetworKIN	-0.114154		CSNK1A1	NES	S1286	NetworKIN	0.557348		CSNK1A1	NES	S1286	NetworKIN	0.587071		CSNK1A1	NES	S1286	NetworKIN	-0.241965
		CSNK1A1	RNF20	S138	NetworKIN	-0.487295		CSNK1A1	RNF20	S138	NetworKIN	0.215561		CSNK1A1	RNF20	S138	NetworKIN	0.340652		CSNK1A1	RNF20	S138	NetworKIN	0.144877
		CSNK1A1	TSC2	S1388	NetworKIN	-0.665574		CSNK1A1	TSC2	S1388	NetworKIN	0.312593		CSNK1A1	TSC2	S1388	NetworKIN	0.345871		CSNK1A1	TSC2	S1388	NetworKIN	-0.03507
		CSNK1A1	TJP1	S175	NetworKIN	-0.560178		CSNK1A1	TJP1	S175	NetworKIN	0.239159		CSNK1A1	TJP1	S175	NetworKIN	0.368379		CSNK1A1	TJP1	S175	NetworKIN	0.00479345
		CSNK1A1	CDKN1B	S178	NetworKIN	-0.765252		CSNK1A1	CDKN1B	S178	NetworKIN	-0.0200448		CSNK1A1	CDKN1B	S178	NetworKIN	0.141546		CSNK1A1	CDKN1B	S178	NetworKIN	-0.289854
		CSNK1A1	CLIP1	S200	NetworKIN	-0.583199		CSNK1A1	CLIP1	S200	NetworKIN	0.235591		CSNK1A1	CLIP1	S200	NetworKIN	0.506674		CSNK1A1	CLIP1	S200	NetworKIN	0.0716068
		CSNK1A1	ACTA1	S201	NetworKIN	0.105598		CSNK1A1	ACTA1	S201	NetworKIN	-0.211244		CSNK1A1	ACTA1	S201	NetworKIN	-0.000799117		CSNK1A1	ACTA1	S201	NetworKIN	0.0908211
		CSNK1A1	CLIP1	S204	NetworKIN	-1.03375		CSNK1A1	CLIP1	S204	NetworKIN	-0.318561		CSNK1A1	CLIP1	S204	NetworKIN	0.183386		CSNK1A1	CLIP1	S204	NetworKIN	-0.122329
		CSNK1A1	YWHAZ	S207	NetworKIN	-0.494625		CSNK1A1	YWHAZ	S207	NetworKIN	0.570137		CSNK1A1	YWHAZ	S207	NetworKIN	0.665094		CSNK1A1	YWHAZ	S207	NetworKIN	0.242573
		CSNK1A1	VIM	S214	NetworKIN	-0.366171		CSNK1A1	VIM	S214	NetworKIN	0.48033		CSNK1A1	VIM	S214	NetworKIN	0.335307		CSNK1A1	VIM	S214	NetworKIN	0.323682
		CSNK1A1	CTNND1	S230	NetworKIN	-0.739874		CSNK1A1	CTNND1	S230	NetworKIN	-0.268686		CSNK1A1	CTNND1	S230	NetworKIN	-0.0260527		CSNK1A1	CTNND1	S230	NetworKIN	-0.0708824
		CSNK1A1	CTNND1	S232	NetworKIN	-0.480927		CSNK1A1	CTNND1	S232	NetworKIN	0.000867749		CSNK1A1	CTNND1	S232	NetworKIN	0.0263872		CSNK1A1	CTNND1	S232	NetworKIN	0.0425315
		CSNK1A1	ARHGDIA	S24	NetworKIN	-0.160897		CSNK1A1	ARHGDIA	S24	NetworKIN	0.163599		CSNK1A1	ARHGDIA	S24	NetworKIN	0.231078		CSNK1A1	ARHGDIA	S24	NetworKIN	-0.0167068
		CSNK1A1	MTOR	S2481	NetworKIN	-0.168194		CSNK1A1	MTOR	S2481	NetworKIN	0.40866		CSNK1A1	MTOR	S2481	NetworKIN	0.62331		CSNK1A1	MTOR	S2481	NetworKIN	0.16587
		CSNK1A1	VIM	S25	NetworKIN	-0.346223		CSNK1A1	VIM	S25	NetworKIN	0.452175		CSNK1A1	VIM	S25	NetworKIN	0.404373		CSNK1A1	VIM	S25	NetworKIN	0.0636407
		CSNK1A1	CTNND1	S252	NetworKIN	-0.142381		CSNK1A1	CTNND1	S252	NetworKIN	-0.204011		CSNK1A1	CTNND1	S252	NetworKIN	0.0409315		CSNK1A1	CTNND1	S252	NetworKIN	0.0847367
		CSNK1A1	PPP1R14A	S26	NetworKIN	-2.23532		CSNK1A1	PPP1R14A	S26	NetworKIN	-0.184145		CSNK1A1	PPP1R14A	S26	NetworKIN	-0.00627499		CSNK1A1	PPP1R14A	S26	NetworKIN	0.382448
		CSNK1A1	RANBP2	S2668	NetworKIN	-0.554578		CSNK1A1	RANBP2	S2668	NetworKIN	0.165935		CSNK1A1	RANBP2	S2668	NetworKIN	0.244035		CSNK1A1	RANBP2	S2668	NetworKIN	-0.0381855
		CSNK1A1	PSMC4	S28	NetworKIN	0.297668		CSNK1A1	PSMC4	S28	NetworKIN	0.831791		CSNK1A1	PSMC4	S28	NetworKIN	0.014569		CSNK1A1	PSMC4	S28	NetworKIN	0.427154
		CSNK1A1	TJP1	S280	NetworKIN	-0.282817		CSNK1A1	TJP1	S280	NetworKIN	0.173075		CSNK1A1	TJP1	S280	NetworKIN	0.272693		CSNK1A1	TJP1	S280	NetworKIN	0.114362
		CSNK1A1	CTNND1	S288	NetworKIN	-0.691507		CSNK1A1	CTNND1	S288	NetworKIN	0.179026		CSNK1A1	CTNND1	S288	NetworKIN	0.0203607		CSNK1A1	CTNND1	S288	NetworKIN	0.0984581
		CSNK1A1	RANBP2	S2900	NetworKIN	-0.259185		CSNK1A1	RANBP2	S2900	NetworKIN	0.448406		CSNK1A1	RANBP2	S2900	NetworKIN	0.666555		CSNK1A1	RANBP2	S2900	NetworKIN	0.150787
		CSNK1A1	IRS1	S312	NetworKIN	-0.517916		CSNK1A1	IRS1	S312	NetworKIN	0.0484965		CSNK1A1	IRS1	S312	NetworKIN	0.353662		CSNK1A1	IRS1	S312	NetworKIN	0.348236
		CSNK1A1	CTNND1	S349	NetworKIN	-0.27484		CSNK1A1	CTNND1	S349	NetworKIN	0.0381353		CSNK1A1	CTNND1	S349	NetworKIN	0.105504		CSNK1A1	CTNND1	S349	NetworKIN	0.0298407
		CSNK1A1	CTNND1	S352	NetworKIN	-0.14197		CSNK1A1	CTNND1	S352	NetworKIN	0.147211		CSNK1A1	CTNND1	S352	NetworKIN	-0.0328977		CSNK1A1	CTNND1	S352	NetworKIN	-0.0847105
		CSNK1A1	RB1	S37	NetworKIN	-0.190303		CSNK1A1	RB1	S37	NetworKIN	0.329255		CSNK1A1	RB1	S37	NetworKIN	0.377733		CSNK1A1	RB1	S37	NetworKIN	0.222403
		CSNK1A1	GSK3A	S39	NetworKIN	-0.249046		CSNK1A1	GSK3A	S39	NetworKIN	-0.20917		CSNK1A1	GSK3A	S39	NetworKIN	0.305838		CSNK1A1	GSK3A	S39	NetworKIN	-0.211578
		CSNK1A1	VIM	S39	NetworKIN	-0.196733		CSNK1A1	VIM	S39	NetworKIN	0.750871		CSNK1A1	VIM	S39	NetworKIN	0.182388		CSNK1A1	VIM	S39	NetworKIN	-0.0635193
		CSNK1A1	PPP2R5A	S42	NetworKIN	-0.388945		CSNK1A1	PPP2R5A	S42	NetworKIN	-0.161755		CSNK1A1	PPP2R5A	S42	NetworKIN	-0.0970852		CSNK1A1	PPP2R5A	S42	NetworKIN	-0.103596
		CSNK1A1	LMNA	S426	NetworKIN	0.179301		CSNK1A1	LMNA	S426	NetworKIN	1.27365		CSNK1A1	LMNA	S426	NetworKIN	0.233879		CSNK1A1	LMNA	S426	NetworKIN	0.443152
		CSNK1A1	LMNA	S428	NetworKIN	-0.085808		CSNK1A1	LMNA	S428	NetworKIN	0.33868		CSNK1A1	LMNA	S428	NetworKIN	0.0259009		CSNK1A1	LMNA	S428	NetworKIN	0.123374
		CSNK1A1	VIM	S430	NetworKIN	-0.874795		CSNK1A1	VIM	S430	NetworKIN	0.117371		CSNK1A1	VIM	S430	NetworKIN	0.145652		CSNK1A1	VIM	S430	NetworKIN	-0.0101115
		CSNK1A1	MARK1	S468	NetworKIN	-0.448352		CSNK1A1	MARK1	S468	NetworKIN	0.128781		CSNK1A1	MARK1	S468	NetworKIN	0.55749		CSNK1A1	MARK1	S468	NetworKIN	0.155162
		CSNK1A1	FOXO1	S470	NetworKIN	-0.422833		CSNK1A1	FOXO1	S470	NetworKIN	0.488398		CSNK1A1	FOXO1	S470	NetworKIN	0.242123		CSNK1A1	FOXO1	S470	NetworKIN	0.030756
		CSNK1A1	PPP2R5A	S49	NetworKIN	0.0594778		CSNK1A1	PPP2R5A	S49	NetworKIN	0.7497		CSNK1A1	PPP2R5A	S49	NetworKIN	0.230973		CSNK1A1	PPP2R5A	S49	NetworKIN	0.00866888
		CSNK1A1	VIM	S5	NetworKIN	-0.855256		CSNK1A1	VIM	S5	NetworKIN	0.380469		CSNK1A1	VIM	S5	NetworKIN	0.163493		CSNK1A1	VIM	S5	NetworKIN	0.685498
		CSNK1A1	EIF2B5	S544	NetworKIN	-0.162955		CSNK1A1	EIF2B5	S544	NetworKIN	-0.0455541		CSNK1A1	EIF2B5	S544	NetworKIN	-0.035111		CSNK1A1	EIF2B5	S544	NetworKIN	-0.136816
		CSNK1A1	VIM	S55	NetworKIN	-0.609567		CSNK1A1	VIM	S55	NetworKIN	-0.0873968		CSNK1A1	VIM	S55	NetworKIN	0.405851		CSNK1A1	VIM	S55	NetworKIN	0.380735
		CSNK1A1	CTNNB1	S552	NetworKIN	0.0103464		CSNK1A1	CTNNB1	S552	NetworKIN	0.228096		CSNK1A1	CTNNB1	S552	NetworKIN	0.158061		CSNK1A1	CTNNB1	S552	NetworKIN	0.0525474
		CSNK1A1	VIM	S56	NetworKIN	-0.0477292		CSNK1A1	VIM	S56	NetworKIN	0.689617		CSNK1A1	VIM	S56	NetworKIN	0.312762		CSNK1A1	VIM	S56	NetworKIN	0.198222
		CSNK1A1	EMD	S58	NetworKIN	0.0524096		CSNK1A1	EMD	S58	NetworKIN	0.266291		CSNK1A1	EMD	S58	NetworKIN	-0.0374278		CSNK1A1	EMD	S58	NetworKIN	0.120122
		CSNK1A1	EMD	S60	NetworKIN	0.0159123		CSNK1A1	EMD	S60	NetworKIN	0.112049		CSNK1A1	EMD	S60	NetworKIN	0.417349		CSNK1A1	EMD	S60	NetworKIN	-0.117424
		CSNK1A1	LMNA	S616	NetworKIN	-0.00819978		CSNK1A1	LMNA	S616	NetworKIN	0.410313		CSNK1A1	LMNA	S616	NetworKIN	0.323264		CSNK1A1	LMNA	S616	NetworKIN	0.391173
		CSNK1A1	LMNA	S619	NetworKIN	-0.0858659		CSNK1A1	LMNA	S619	NetworKIN	0.0906753		CSNK1A1	LMNA	S619	NetworKIN	0.116084		CSNK1A1	LMNA	S619	NetworKIN	0.00102112
		CSNK1A1	HDAC4	S636	NetworKIN	-0.0154359		CSNK1A1	HDAC4	S636	NetworKIN	2.17983		CSNK1A1	HDAC4	S636	NetworKIN	0.300433		CSNK1A1	HDAC4	S636	NetworKIN	0.1324
		CSNK1A1	LMNA	S636	NetworKIN	-0.129011		CSNK1A1	LMNA	S636	NetworKIN	0.526222		CSNK1A1	LMNA	S636	NetworKIN	0.0986122		CSNK1A1	LMNA	S636	NetworKIN	-0.134011
		CSNK1A1	CTNNA3	S637	NetworKIN	0.196956		CSNK1A1	CTNNA3	S637	NetworKIN	0.13199		CSNK1A1	CTNNA3	S637	NetworKIN	0.0397555		CSNK1A1	CTNNA3	S637	NetworKIN	-0.0300828
		CSNK1A1	CTNNA1	S641	NetworKIN	-0.223934		CSNK1A1	CTNNA1	S641	NetworKIN	0.382668		CSNK1A1	CTNNA1	S641	NetworKIN	0.251905		CSNK1A1	CTNNA1	S641	NetworKIN	0.0378805
		CSNK1A1	CTNNA1	S652	NetworKIN	0.148053		CSNK1A1	CTNNA1	S652	NetworKIN	0.121792		CSNK1A1	CTNNA1	S652	NetworKIN	0.106366		CSNK1A1	CTNNA1	S652	NetworKIN	-0.11012
		CSNK1A1	CTNNA1	S655	NetworKIN	0.265894		CSNK1A1	CTNNA1	S655	NetworKIN	0.274197		CSNK1A1	CTNNA1	S655	NetworKIN	0.234132		CSNK1A1	CTNNA1	S655	NetworKIN	-0.122773
		CSNK1A1	EPB41L2	S682	NetworKIN	-0.622691		CSNK1A1	EPB41L2	S682	NetworKIN	-0.0134336		CSNK1A1	EPB41L2	S682	NetworKIN	0.373214		CSNK1A1	EPB41L2	S682	NetworKIN	-0.0311727
		CSNK1A1	CRTC2	S70	NetworKIN	-0.291858		CSNK1A1	CRTC2	S70	NetworKIN	-0.119446		CSNK1A1	CRTC2	S70	NetworKIN	0.143433		CSNK1A1	CRTC2	S70	NetworKIN	-0.0528032
		CSNK1A1	EPB41L2	S718	NetworKIN	-0.288243		CSNK1A1	EPB41L2	S718	NetworKIN	0.0248213		CSNK1A1	EPB41L2	S718	NetworKIN	0.0267412		CSNK1A1	EPB41L2	S718	NetworKIN	0.147981
		CSNK1A1	VCL	S721	NetworKIN	-0.905743		CSNK1A1	VCL	S721	NetworKIN	0.860026		CSNK1A1	VCL	S721	NetworKIN	0.129287		CSNK1A1	VCL	S721	NetworKIN	0.237827
		CSNK1A1	PRKCE	S729	NetworKIN	0.115593		CSNK1A1	PRKCE	S729	NetworKIN	0.169051		CSNK1A1	PRKCE	S729	NetworKIN	0.63326		CSNK1A1	PRKCE	S729	NetworKIN	0.0836982
		CSNK1A1	PRKAR2A	S78	NetworKIN	-0.334124		CSNK1A1	PRKAR2A	S78	NetworKIN	0.163518		CSNK1A1	PRKAR2A	S78	NetworKIN	0.130566		CSNK1A1	PRKAR2A	S78	NetworKIN	0.0710053
		CSNK1A1	RANBP2	S788	NetworKIN	-0.418299		CSNK1A1	RANBP2	S788	NetworKIN	-0.0984847		CSNK1A1	RANBP2	S788	NetworKIN	0.143333		CSNK1A1	RANBP2	S788	NetworKIN	-0.0834799
		CSNK1A1	PRKAR2A	S80	NetworKIN	-0.182898		CSNK1A1	PRKAR2A	S80	NetworKIN	0.127132		CSNK1A1	PRKAR2A	S80	NetworKIN	0.0832369		CSNK1A1	PRKAR2A	S80	NetworKIN	0.0238706
		CSNK1A1	PRKAR1A	S83	NetworKIN	-0.0772467		CSNK1A1	PRKAR1A	S83	NetworKIN	0.410368		CSNK1A1	PRKAR1A	S83	NetworKIN	0.223662		CSNK1A1	PRKAR1A	S83	NetworKIN	0.205378
		CSNK1A1	CTNND1	S864	NetworKIN	-0.0511112		CSNK1A1	CTNND1	S864	NetworKIN	0.232097		CSNK1A1	CTNND1	S864	NetworKIN	0.0895383		CSNK1A1	CTNND1	S864	NetworKIN	0.0297404
		CSNK1A1	TJP1	S927	NetworKIN	-0.337275		CSNK1A1	TJP1	S927	NetworKIN	0.127776		CSNK1A1	TJP1	S927	NetworKIN	0.146767		CSNK1A1	TJP1	S927	NetworKIN	0.135689
		CSNK1A1	THRAP3	S939	NetworKIN	-0.38642		CSNK1A1	THRAP3	S939	NetworKIN	0.254914		CSNK1A1	THRAP3	S939	NetworKIN	0.310406		CSNK1A1	THRAP3	S939	NetworKIN	-0.0200282
		CSNK1A1	PRKAR2A	T104	NetworKIN	-0.076431		CSNK1A1	PRKAR2A	T104	NetworKIN	-0.196348		CSNK1A1	PRKAR2A	T104	NetworKIN	0.0190854		CSNK1A1	PRKAR2A	T104	NetworKIN	-0.0991012
		CSNK1A1	RANBP2	T2293	NetworKIN	-0.0172852		CSNK1A1	RANBP2	T2293	NetworKIN	-0.102301		CSNK1A1	RANBP2	T2293	NetworKIN	0.0929413		CSNK1A1	RANBP2	T2293	NetworKIN	0.0113576
		CSNK1A1	PSMD1	T273	NetworKIN	-0.119107		CSNK1A1	PSMD1	T273	NetworKIN	0.612823		CSNK1A1	PSMD1	T273	NetworKIN	0.831272		CSNK1A1	PSMD1	T273	NetworKIN	1.77765
		CSNK1A1	MAP2K6	T28	NetworKIN	-0.897324		CSNK1A1	MAP2K6	T28	NetworKIN	0.107718		CSNK1A1	MAP2K6	T28	NetworKIN	-0.102275		CSNK1A1	MAP2K6	T28	NetworKIN	-0.00768202
		CSNK1A1	PCYT1A	T342	NetworKIN	-0.223868		CSNK1A1	PCYT1A	T342	NetworKIN	-0.282748		CSNK1A1	PCYT1A	T342	NetworKIN	-0.0675057		CSNK1A1	PCYT1A	T342	NetworKIN	-0.277039
		CSNK1A1	CSNK1D	T352	NetworKIN	-0.596956		CSNK1A1	CSNK1D	T352	NetworKIN	0.202874		CSNK1A1	CSNK1D	T352	NetworKIN	0.278986		CSNK1A1	CSNK1D	T352	NetworKIN	-0.357026
		CSNK1A1	CDC5L	T396	NetworKIN	-0.381902		CSNK1A1	CDC5L	T396	NetworKIN	0.158452		CSNK1A1	CDC5L	T396	NetworKIN	0.0738193		CSNK1A1	CDC5L	T396	NetworKIN	0.315931
		CSNK1A1	LMNA	T409	NetworKIN	-0.15288		CSNK1A1	LMNA	T409	NetworKIN	0.331106		CSNK1A1	LMNA	T409	NetworKIN	0.223486		CSNK1A1	LMNA	T409	NetworKIN	0.19879
		CSNK1A1	NUP214	T437	NetworKIN	0.617433		CSNK1A1	NUP214	T437	NetworKIN	0.811026		CSNK1A1	NUP214	T437	NetworKIN	0.197753		CSNK1A1	NUP214	T437	NetworKIN	0.665608
		CSNK1A1	IRS1	T530	NetworKIN	-0.60952		CSNK1A1	IRS1	T530	NetworKIN	-0.248466		CSNK1A1	IRS1	T530	NetworKIN	0.346346		CSNK1A1	IRS1	T530	NetworKIN	0.0823952
		CSNK1A1	CTNNB1	T551	NetworKIN	0.0248789		CSNK1A1	CTNNB1	T551	NetworKIN	0.415619		CSNK1A1	CTNNB1	T551	NetworKIN	0.105122		CSNK1A1	CTNNB1	T551	NetworKIN	-0.0124792
		CSNK1A1	CTNNA1	T645	NetworKIN	-0.388193		CSNK1A1	CTNNA1	T645	NetworKIN	0.317286		CSNK1A1	CTNNA1	T645	NetworKIN	0.0166674		CSNK1A1	CTNNA1	T645	NetworKIN	-0.057685
		CSNK1A1	CTNNA1	T658	NetworKIN	-0.29486		CSNK1A1	CTNNA1	T658	NetworKIN	0.026222		CSNK1A1	CTNNA1	T658	NetworKIN	0.340899		CSNK1A1	CTNNA1	T658	NetworKIN	-0.0939826
		CSNK1A1	CTNND1	T869	NetworKIN	-0.709655		CSNK1A1	CTNND1	T869	NetworKIN	-0.374616		CSNK1A1	CTNND1	T869	NetworKIN	0.0673438		CSNK1A1	CTNND1	T869	NetworKIN	0.0436361
		CSNK1D	PRKAR2B	S114	NetworKIN	-0.177597		CSNK1D	PRKAR2B	S114	NetworKIN	0.0739622		CSNK1D	PRKAR2B	S114	NetworKIN	-0.020849		CSNK1D	PRKAR2B	S114	NetworKIN	-0.0592513
		CSNK1D	MAP1B	S1262	NetworKIN	0.454568		CSNK1D	MAP1B	S1262	NetworKIN	0.15554		CSNK1D	MAP1B	S1262	NetworKIN	0.342966		CSNK1D	MAP1B	S1262	NetworKIN	0.196901
		CSNK1D	MAP1B	S1265	NetworKIN	-0.231074		CSNK1D	MAP1B	S1265	NetworKIN	0.365886		CSNK1D	MAP1B	S1265	NetworKIN	0.245004		CSNK1D	MAP1B	S1265	NetworKIN	0.172535
		CSNK1D	TJP1	S131	NetworKIN	-0.151849		CSNK1D	TJP1	S131	NetworKIN	0.161851		CSNK1D	TJP1	S131	NetworKIN	0.240123		CSNK1D	TJP1	S131	NetworKIN	-0.00187957
		CSNK1D	TACC2	S1313	NetworKIN	-0.299232		CSNK1D	TACC2	S1313	NetworKIN	0.321304		CSNK1D	TACC2	S1313	NetworKIN	0.150396		CSNK1D	TACC2	S1313	NetworKIN	0.0172746
		CSNK1D	TSC2	S1388	NetworKIN	-0.665574		CSNK1D	TSC2	S1388	NetworKIN	0.312593		CSNK1D	TSC2	S1388	NetworKIN	0.345871		CSNK1D	TSC2	S1388	NetworKIN	-0.03507
		CSNK1D	MAP1B	S1389	NetworKIN	-1.2018		CSNK1D	MAP1B	S1389	NetworKIN	0.390225		CSNK1D	MAP1B	S1389	NetworKIN	-0.0347509		CSNK1D	MAP1B	S1389	NetworKIN	0.508869
		CSNK1D	CLIP1	S143	NetworKIN	-0.331444		CSNK1D	CLIP1	S143	NetworKIN	0.180319		CSNK1D	CLIP1	S143	NetworKIN	0.0773774		CSNK1D	CLIP1	S143	NetworKIN	-0.0659771
		CSNK1D	FGFR1OP	S156	NetworKIN	-0.964901		CSNK1D	FGFR1OP	S156	NetworKIN	-0.108109		CSNK1D	FGFR1OP	S156	NetworKIN	0.523001		CSNK1D	FGFR1OP	S156	NetworKIN	0.247673
		CSNK1D	TJP1	S175	NetworKIN	-0.560178		CSNK1D	TJP1	S175	NetworKIN	0.239159		CSNK1D	TJP1	S175	NetworKIN	0.368379		CSNK1D	TJP1	S175	NetworKIN	0.00479345
		CSNK1D	CDKN1B	S178	NetworKIN	-0.765252		CSNK1D	CDKN1B	S178	NetworKIN	-0.0200448		CSNK1D	CDKN1B	S178	NetworKIN	0.141546		CSNK1D	CDKN1B	S178	NetworKIN	-0.289854
		CSNK1D	TJP1	S178	NetworKIN	-0.595108		CSNK1D	TJP1	S178	NetworKIN	0.20041		CSNK1D	TJP1	S178	NetworKIN	0.289938		CSNK1D	TJP1	S178	NetworKIN	-0.0289837
		CSNK1D	MAP1B	S1797	NetworKIN	0.756087		CSNK1D	MAP1B	S1797	NetworKIN	0.254594		CSNK1D	MAP1B	S1797	NetworKIN	0.507344		CSNK1D	MAP1B	S1797	NetworKIN	0.693856
		CSNK1D	MAP1B	S1819	NetworKIN	-0.891206		CSNK1D	MAP1B	S1819	NetworKIN	0.226501		CSNK1D	MAP1B	S1819	NetworKIN	0.0934097		CSNK1D	MAP1B	S1819	NetworKIN	0.0175228
		CSNK1D	MAP1B	S1915	NetworKIN	-0.241206		CSNK1D	MAP1B	S1915	NetworKIN	0.052014		CSNK1D	MAP1B	S1915	NetworKIN	0.0933937		CSNK1D	MAP1B	S1915	NetworKIN	0.141555
		CSNK1D	CLIP1	S197	NetworKIN	-1.00793		CSNK1D	CLIP1	S197	NetworKIN	-0.379959		CSNK1D	CLIP1	S197	NetworKIN	0.370521		CSNK1D	CLIP1	S197	NetworKIN	-0.163016
		CSNK1D	CLIP1	S200	NetworKIN	-0.583199		CSNK1D	CLIP1	S200	NetworKIN	0.235591		CSNK1D	CLIP1	S200	NetworKIN	0.506674		CSNK1D	CLIP1	S200	NetworKIN	0.0716068
		CSNK1D	CLIP1	S204	NetworKIN	-1.03375		CSNK1D	CLIP1	S204	NetworKIN	-0.318561		CSNK1D	CLIP1	S204	NetworKIN	0.183386		CSNK1D	CLIP1	S204	NetworKIN	-0.122329
		CSNK1D	YWHAZ	S207	NetworKIN	-0.494625		CSNK1D	YWHAZ	S207	NetworKIN	0.570137		CSNK1D	YWHAZ	S207	NetworKIN	0.665094		CSNK1D	YWHAZ	S207	NetworKIN	0.242573
		CSNK1D	NR1D1	S23	NetworKIN	0.00947981		CSNK1D	NR1D1	S23	NetworKIN	0.276842		CSNK1D	NR1D1	S23	NetworKIN	0.358212		CSNK1D	NR1D1	S23	NetworKIN	0.137758
		CSNK1D	MTOR	S2481	NetworKIN	-0.168194		CSNK1D	MTOR	S2481	NetworKIN	0.40866		CSNK1D	MTOR	S2481	NetworKIN	0.62331		CSNK1D	MTOR	S2481	NetworKIN	0.16587
		CSNK1D	TACC2	S2512	NetworKIN	-0.70079		CSNK1D	TACC2	S2512	NetworKIN	0.258649		CSNK1D	TACC2	S2512	NetworKIN	0.175532		CSNK1D	TACC2	S2512	NetworKIN	-0.215987
		CSNK1D	FOXO1	S256	NetworKIN	-0.417025		CSNK1D	FOXO1	S256	NetworKIN	-0.161306		CSNK1D	FOXO1	S256	NetworKIN	0.339167		CSNK1D	FOXO1	S256	NetworKIN	0.175884
		CSNK1D	PPP1R14A	S26	NetworKIN	-2.23532		CSNK1D	PPP1R14A	S26	NetworKIN	-0.184145		CSNK1D	PPP1R14A	S26	NetworKIN	-0.00627499		CSNK1D	PPP1R14A	S26	NetworKIN	0.382448
		CSNK1D	SIRT1	S27	NetworKIN	-0.628387		CSNK1D	SIRT1	S27	NetworKIN	-0.0211236		CSNK1D	SIRT1	S27	NetworKIN	-0.0238376		CSNK1D	SIRT1	S27	NetworKIN	0.168533
		CSNK1D	CAMK2D	S280	NetworKIN	-0.450589		CSNK1D	CAMK2D	S280	NetworKIN	-0.001264		CSNK1D	CAMK2D	S280	NetworKIN	-0.11103		CSNK1D	CAMK2D	S280	NetworKIN	0.0656312
		CSNK1D	TJP1	S280	NetworKIN	-0.282817		CSNK1D	TJP1	S280	NetworKIN	0.173075		CSNK1D	TJP1	S280	NetworKIN	0.272693		CSNK1D	TJP1	S280	NetworKIN	0.114362
		CSNK1D	FOXO1	S287	NetworKIN	-0.491937		CSNK1D	FOXO1	S287	NetworKIN	0.173654		CSNK1D	FOXO1	S287	NetworKIN	0.225351		CSNK1D	FOXO1	S287	NetworKIN	-0.0751309
		CSNK1D	TJP1	S300	NetworKIN	-0.363663		CSNK1D	TJP1	S300	NetworKIN	0.210798		CSNK1D	TJP1	S300	NetworKIN	0.375077		CSNK1D	TJP1	S300	NetworKIN	0.216429
		CSNK1D	TJP1	S329	NetworKIN	-0.0350704		CSNK1D	TJP1	S329	NetworKIN	0.130097		CSNK1D	TJP1	S329	NetworKIN	-0.0852847		CSNK1D	TJP1	S329	NetworKIN	-0.128609
		CSNK1D	CSNK1D	S331	NetworKIN	-0.280037		CSNK1D	CSNK1D	S331	NetworKIN	-0.387531		CSNK1D	CSNK1D	S331	NetworKIN	0.07		CSNK1D	CSNK1D	S331	NetworKIN	-0.221547
		CSNK1D	CAMK2D	S333	NetworKIN	-0.560425		CSNK1D	CAMK2D	S333	NetworKIN	-0.211429		CSNK1D	CAMK2D	S333	NetworKIN	0.338293		CSNK1D	CAMK2D	S333	NetworKIN	-0.229111
		CSNK1D	PRKCE	S337	NetworKIN	-0.40447		CSNK1D	PRKCE	S337	NetworKIN	0.774299		CSNK1D	PRKCE	S337	NetworKIN	0.0879153		CSNK1D	PRKCE	S337	NetworKIN	0.0835642
		CSNK1D	CAMK2B	S367	NetworKIN	0.669315		CSNK1D	CAMK2B	S367	NetworKIN	0.964214		CSNK1D	CAMK2B	S367	NetworKIN	0.279568		CSNK1D	CAMK2B	S367	NetworKIN	2.45751
		CSNK1D	SIRT2	S368	NetworKIN	-0.464283		CSNK1D	SIRT2	S368	NetworKIN	0.515511		CSNK1D	SIRT2	S368	NetworKIN	-0.0255978		CSNK1D	SIRT2	S368	NetworKIN	0.0735149
		CSNK1D	CAMK2B	S397	NetworKIN	-0.166574		CSNK1D	CAMK2B	S397	NetworKIN	0.268789		CSNK1D	CAMK2B	S397	NetworKIN	0.0803756		CSNK1D	CAMK2B	S397	NetworKIN	-0.739609
		CSNK1D	DYNC1LI1	S419	NetworKIN	0.00358402		CSNK1D	DYNC1LI1	S419	NetworKIN	1.52681		CSNK1D	DYNC1LI1	S419	NetworKIN	0.166913		CSNK1D	DYNC1LI1	S419	NetworKIN	0.704762
		CSNK1D	CDC26	S42	NetworKIN	-0.28092		CSNK1D	CDC26	S42	NetworKIN	0.197652		CSNK1D	CDC26	S42	NetworKIN	0.808221		CSNK1D	CDC26	S42	NetworKIN	0.022477
		CSNK1D	DYNC1H1	S4368	NetworKIN	0.0748846		CSNK1D	DYNC1H1	S4368	NetworKIN	0.323694		CSNK1D	DYNC1H1	S4368	NetworKIN	-0.0301705		CSNK1D	DYNC1H1	S4368	NetworKIN	0.155332
		CSNK1D	FOXO1	S470	NetworKIN	-0.422833		CSNK1D	FOXO1	S470	NetworKIN	0.488398		CSNK1D	FOXO1	S470	NetworKIN	0.242123		CSNK1D	FOXO1	S470	NetworKIN	0.030756
		CSNK1D	NEFL	S472	NetworKIN	-0.230856		CSNK1D	NEFL	S472	NetworKIN	0.98924		CSNK1D	NEFL	S472	NetworKIN	0.778308		CSNK1D	NEFL	S472	NetworKIN	0.00152455
		CSNK1D	CLIP1	S48	NetworKIN	-0.489015		CSNK1D	CLIP1	S48	NetworKIN	0.193961		CSNK1D	CLIP1	S48	NetworKIN	0.123898		CSNK1D	CLIP1	S48	NetworKIN	-0.139983
		CSNK1D	PPP2R5A	S49	NetworKIN	0.0594778		CSNK1D	PPP2R5A	S49	NetworKIN	0.7497		CSNK1D	PPP2R5A	S49	NetworKIN	0.230973		CSNK1D	PPP2R5A	S49	NetworKIN	0.00866888
		CSNK1D	DYNC1LI1	S516	NetworKIN	0.612647		CSNK1D	DYNC1LI1	S516	NetworKIN	2.10381		CSNK1D	DYNC1LI1	S516	NetworKIN	0.244713		CSNK1D	DYNC1LI1	S516	NetworKIN	0.910572
		CSNK1D	SIK2	S534	NetworKIN	-0.703676		CSNK1D	SIK2	S534	NetworKIN	0.0810922		CSNK1D	SIK2	S534	NetworKIN	0.713182		CSNK1D	SIK2	S534	NetworKIN	0.138241
		CSNK1D	CTNNB1	S552	NetworKIN	0.0103464		CSNK1D	CTNNB1	S552	NetworKIN	0.228096		CSNK1D	CTNNB1	S552	NetworKIN	0.158061		CSNK1D	CTNNB1	S552	NetworKIN	0.0525474
		CSNK1D	CLASP1	S559	NetworKIN	-0.748901		CSNK1D	CLASP1	S559	NetworKIN	-0.0712713		CSNK1D	CLASP1	S559	NetworKIN	0.139206		CSNK1D	CLASP1	S559	NetworKIN	-0.0432786
		CSNK1D	TACC2	S571	NetworKIN	-0.221196		CSNK1D	TACC2	S571	NetworKIN	0.0942799		CSNK1D	TACC2	S571	NetworKIN	0.0148107		CSNK1D	TACC2	S571	NetworKIN	1.19173
		CSNK1D	MAP1S	S631	NetworKIN	-0.202049		CSNK1D	MAP1S	S631	NetworKIN	0.0968756		CSNK1D	MAP1S	S631	NetworKIN	0.190553		CSNK1D	MAP1S	S631	NetworKIN	0.195742
		CSNK1D	HDAC4	S636	NetworKIN	-0.0154359		CSNK1D	HDAC4	S636	NetworKIN	2.17983		CSNK1D	HDAC4	S636	NetworKIN	0.300433		CSNK1D	HDAC4	S636	NetworKIN	0.1324
		CSNK1D	PCM1	S644	NetworKIN	0.0514348		CSNK1D	PCM1	S644	NetworKIN	0.281148		CSNK1D	PCM1	S644	NetworKIN	0.69061		CSNK1D	PCM1	S644	NetworKIN	-0.0283061
		CSNK1D	PCM1	S68	NetworKIN	0.0717727		CSNK1D	PCM1	S68	NetworKIN	0.126046		CSNK1D	PCM1	S68	NetworKIN	0.0583785		CSNK1D	PCM1	S68	NetworKIN	0.0898267
		CSNK1D	CLASP1	S687	NetworKIN	-0.0993369		CSNK1D	CLASP1	S687	NetworKIN	-0.0819915		CSNK1D	CLASP1	S687	NetworKIN	-0.0107218		CSNK1D	CLASP1	S687	NetworKIN	-0.0586988
		CSNK1D	PCM1	S69	NetworKIN	-0.351015		CSNK1D	PCM1	S69	NetworKIN	-0.144387		CSNK1D	PCM1	S69	NetworKIN	0.0673816		CSNK1D	PCM1	S69	NetworKIN	-0.200237
		CSNK1D	CRTC2	S70	NetworKIN	-0.291858		CSNK1D	CRTC2	S70	NetworKIN	-0.119446		CSNK1D	CRTC2	S70	NetworKIN	0.143433		CSNK1D	CRTC2	S70	NetworKIN	-0.0528032
		CSNK1D	PRKCE	S729	NetworKIN	0.115593		CSNK1D	PRKCE	S729	NetworKIN	0.169051		CSNK1D	PRKCE	S729	NetworKIN	0.63326		CSNK1D	PRKCE	S729	NetworKIN	0.0836982
		CSNK1D	DYNC1I2	S73	NetworKIN	-0.12122		CSNK1D	DYNC1I2	S73	NetworKIN	0.415249		CSNK1D	DYNC1I2	S73	NetworKIN	0.227097		CSNK1D	DYNC1I2	S73	NetworKIN	1.17591
		CSNK1D	PRKAR2A	S78	NetworKIN	-0.334124		CSNK1D	PRKAR2A	S78	NetworKIN	0.163518		CSNK1D	PRKAR2A	S78	NetworKIN	0.130566		CSNK1D	PRKAR2A	S78	NetworKIN	0.0710053
		CSNK1D	PRKAR2A	S80	NetworKIN	-0.182898		CSNK1D	PRKAR2A	S80	NetworKIN	0.127132		CSNK1D	PRKAR2A	S80	NetworKIN	0.0832369		CSNK1D	PRKAR2A	S80	NetworKIN	0.0238706
		CSNK1D	MAP1B	S828	NetworKIN	-0.251774		CSNK1D	MAP1B	S828	NetworKIN	0.413028		CSNK1D	MAP1B	S828	NetworKIN	0.53591		CSNK1D	MAP1B	S828	NetworKIN	0.0704422
		CSNK1D	PRKAR1A	S83	NetworKIN	-0.0772467		CSNK1D	PRKAR1A	S83	NetworKIN	0.410368		CSNK1D	PRKAR1A	S83	NetworKIN	0.223662		CSNK1D	PRKAR1A	S83	NetworKIN	0.205378
		CSNK1D	TJP1	S927	NetworKIN	-0.337275		CSNK1D	TJP1	S927	NetworKIN	0.127776		CSNK1D	TJP1	S927	NetworKIN	0.146767		CSNK1D	TJP1	S927	NetworKIN	0.135689
		CSNK1D	PCM1	S93	NetworKIN	0.0328982		CSNK1D	PCM1	S93	NetworKIN	1.33252		CSNK1D	PCM1	S93	NetworKIN	-0.312099		CSNK1D	PCM1	S93	NetworKIN	0.205923
		CSNK1D	MAP1B	S937	NetworKIN	-1.83418		CSNK1D	MAP1B	S937	NetworKIN	0.678133		CSNK1D	MAP1B	S937	NetworKIN	-0.17738		CSNK1D	MAP1B	S937	NetworKIN	0.122486
		CSNK1D	TACC2	S962	NetworKIN	-0.561548		CSNK1D	TACC2	S962	NetworKIN	0.516985		CSNK1D	TACC2	S962	NetworKIN	0.0653059		CSNK1D	TACC2	S962	NetworKIN	0.170244
		CSNK1D	TJP1	S968	NetworKIN	0.0556745		CSNK1D	TJP1	S968	NetworKIN	0.606562		CSNK1D	TJP1	S968	NetworKIN	0.201258		CSNK1D	TJP1	S968	NetworKIN	0.208084
		CSNK1D	MAP1B	S995	NetworKIN	-1.08638		CSNK1D	MAP1B	S995	NetworKIN	0.696309		CSNK1D	MAP1B	S995	NetworKIN	0.432385		CSNK1D	MAP1B	S995	NetworKIN	0.381543
		CSNK1D	DEK	T13	NetworKIN	-0.232947		CSNK1D	DEK	T13	NetworKIN	0.0213605		CSNK1D	DEK	T13	NetworKIN	-0.0151221		CSNK1D	DEK	T13	NetworKIN	-0.0895453
		CSNK1D	CLIP1	T182	NetworKIN	-0.664763		CSNK1D	CLIP1	T182	NetworKIN	0.141083		CSNK1D	CLIP1	T182	NetworKIN	0.326972		CSNK1D	CLIP1	T182	NetworKIN	-0.048835
		CSNK1D	CLIP1	T191	NetworKIN	-0.760161		CSNK1D	CLIP1	T191	NetworKIN	-0.109779		CSNK1D	CLIP1	T191	NetworKIN	0.301468		CSNK1D	CLIP1	T191	NetworKIN	-0.453582
		CSNK1D	CAMK2D	T336	NetworKIN	-0.362752		CSNK1D	CAMK2D	T336	NetworKIN	0.179348		CSNK1D	CAMK2D	T336	NetworKIN	0.253256		CSNK1D	CAMK2D	T336	NetworKIN	-0.241091
		CSNK1D	PCYT1A	T342	NetworKIN	-0.223868		CSNK1D	PCYT1A	T342	NetworKIN	-0.282748		CSNK1D	PCYT1A	T342	NetworKIN	-0.0675057		CSNK1D	PCYT1A	T342	NetworKIN	-0.277039
		CSNK1D	CSNK1D	T352	NetworKIN	-0.596956		CSNK1D	CSNK1D	T352	NetworKIN	0.202874		CSNK1D	CSNK1D	T352	NetworKIN	0.278986		CSNK1D	CSNK1D	T352	NetworKIN	-0.357026
		CSNK1D	CAMK2B	T366	NetworKIN	0.572024		CSNK1D	CAMK2B	T366	NetworKIN	0.641335		CSNK1D	CAMK2B	T366	NetworKIN	0.251736		CSNK1D	CAMK2B	T366	NetworKIN	2.11882
		CSNK1D	CAMK2B	T371	NetworKIN	-0.261706		CSNK1D	CAMK2B	T371	NetworKIN	0.101328		CSNK1D	CAMK2B	T371	NetworKIN	0.179021		CSNK1D	CAMK2B	T371	NetworKIN	-0.100347
		CSNK1D	CAMK2B	T400	NetworKIN	-0.237087		CSNK1D	CAMK2B	T400	NetworKIN	0.230772		CSNK1D	CAMK2B	T400	NetworKIN	0.397914		CSNK1D	CAMK2B	T400	NetworKIN	-0.176592
		CSNK1D	EBAG9	T41	NetworKIN	-0.468517		CSNK1D	EBAG9	T41	NetworKIN	0.246776		CSNK1D	EBAG9	T41	NetworKIN	0.359431		CSNK1D	EBAG9	T41	NetworKIN	-0.0447489
		CSNK1D	DYNC1LI1	T513	NetworKIN	0.00976005		CSNK1D	DYNC1LI1	T513	NetworKIN	1.19955		CSNK1D	DYNC1LI1	T513	NetworKIN	-0.111995		CSNK1D	DYNC1LI1	T513	NetworKIN	0.846057
		CSNK1D	CTNNB1	T551	NetworKIN	0.0248789		CSNK1D	CTNNB1	T551	NetworKIN	0.415619		CSNK1D	CTNNB1	T551	NetworKIN	0.105122		CSNK1D	CTNNB1	T551	NetworKIN	-0.0124792
		CSNK1E	PRKAR2B	S114	NetworKIN	-0.177597		CSNK1E	PRKAR2B	S114	NetworKIN	0.0739622		CSNK1E	PRKAR2B	S114	NetworKIN	-0.020849		CSNK1E	PRKAR2B	S114	NetworKIN	-0.0592513
		CSNK1E	FGFR1OP	S156	NetworKIN	-0.964901		CSNK1E	FGFR1OP	S156	NetworKIN	-0.108109		CSNK1E	FGFR1OP	S156	NetworKIN	0.523001		CSNK1E	FGFR1OP	S156	NetworKIN	0.247673
		CSNK1E	DVL3	S192	NetworKIN	-0.0458752		CSNK1E	DVL3	S192	NetworKIN	0.057827		CSNK1E	DVL3	S192	NetworKIN	0.402842		CSNK1E	DVL3	S192	NetworKIN	-0.262417
		CSNK1E	YWHAZ	S207	NetworKIN	-0.494625		CSNK1E	YWHAZ	S207	NetworKIN	0.570137		CSNK1E	YWHAZ	S207	NetworKIN	0.665094		CSNK1E	YWHAZ	S207	NetworKIN	0.242573
		CSNK1E	NR1D1	S23	NetworKIN	0.00947981		CSNK1E	NR1D1	S23	NetworKIN	0.276842		CSNK1E	NR1D1	S23	NetworKIN	0.358212		CSNK1E	NR1D1	S23	NetworKIN	0.137758
		CSNK1E	FOXO1	S256	NetworKIN	-0.417025		CSNK1E	FOXO1	S256	NetworKIN	-0.161306		CSNK1E	FOXO1	S256	NetworKIN	0.339167		CSNK1E	FOXO1	S256	NetworKIN	0.175884
		CSNK1E	PPP1R14A	S26	NetworKIN	-2.23532		CSNK1E	PPP1R14A	S26	NetworKIN	-0.184145		CSNK1E	PPP1R14A	S26	NetworKIN	-0.00627499		CSNK1E	PPP1R14A	S26	NetworKIN	0.382448
		CSNK1E	FOXO1	S287	NetworKIN	-0.491937		CSNK1E	FOXO1	S287	NetworKIN	0.173654		CSNK1E	FOXO1	S287	NetworKIN	0.225351		CSNK1E	FOXO1	S287	NetworKIN	-0.0751309
		CSNK1E	CSNK1D	S331	NetworKIN	-0.280037		CSNK1E	CSNK1D	S331	NetworKIN	-0.387531		CSNK1E	CSNK1D	S331	NetworKIN	0.07		CSNK1E	CSNK1D	S331	NetworKIN	-0.221547
		CSNK1E	DYNC1H1	S4368	NetworKIN	0.0748846		CSNK1E	DYNC1H1	S4368	NetworKIN	0.323694		CSNK1E	DYNC1H1	S4368	NetworKIN	-0.0301705		CSNK1E	DYNC1H1	S4368	NetworKIN	0.155332
		CSNK1E	FOXO1	S470	NetworKIN	-0.422833		CSNK1E	FOXO1	S470	NetworKIN	0.488398		CSNK1E	FOXO1	S470	NetworKIN	0.242123		CSNK1E	FOXO1	S470	NetworKIN	0.030756
		CSNK1E	CLASP1	S559	NetworKIN	-0.748901		CSNK1E	CLASP1	S559	NetworKIN	-0.0712713		CSNK1E	CLASP1	S559	NetworKIN	0.139206		CSNK1E	CLASP1	S559	NetworKIN	-0.0432786
		CSNK1E	CLASP1	S598	NetworKIN	-0.0870856		CSNK1E	CLASP1	S598	NetworKIN	0.106178		CSNK1E	CLASP1	S598	NetworKIN	0.338795		CSNK1E	CLASP1	S598	NetworKIN	0.0286844
		CSNK1E	CLASP1	S600	NetworKIN	-0.134784		CSNK1E	CLASP1	S600	NetworKIN	0.202894		CSNK1E	CLASP1	S600	NetworKIN	0.135309		CSNK1E	CLASP1	S600	NetworKIN	-0.0439373
		CSNK1E	CLASP1	S687	NetworKIN	-0.0993369		CSNK1E	CLASP1	S687	NetworKIN	-0.0819915		CSNK1E	CLASP1	S687	NetworKIN	-0.0107218		CSNK1E	CLASP1	S687	NetworKIN	-0.0586988
		CSNK1E	DYNC1I2	S73	NetworKIN	-0.12122		CSNK1E	DYNC1I2	S73	NetworKIN	0.415249		CSNK1E	DYNC1I2	S73	NetworKIN	0.227097		CSNK1E	DYNC1I2	S73	NetworKIN	1.17591
		CSNK1E	CSNK1D	T352	NetworKIN	-0.596956		CSNK1E	CSNK1D	T352	NetworKIN	0.202874		CSNK1E	CSNK1D	T352	NetworKIN	0.278986		CSNK1E	CSNK1D	T352	NetworKIN	-0.357026
		CSNK1G1	DIDO1	S1260	NetworKIN	0.0411083		CSNK1G1	DIDO1	S1260	NetworKIN	0.36033		CSNK1G1	DIDO1	S1260	NetworKIN	0.695853		CSNK1G1	DIDO1	S1260	NetworKIN	-0.0374908
		CSNK1G1	DIDO1	S1456	NetworKIN	-0.146193		CSNK1G1	DIDO1	S1456	NetworKIN	0.597471		CSNK1G1	DIDO1	S1456	NetworKIN	0.24774		CSNK1G1	DIDO1	S1456	NetworKIN	0.325686
		CSNK1G1	DIDO1	S1714	NetworKIN	-0.551056		CSNK1G1	DIDO1	S1714	NetworKIN	0.379035		CSNK1G1	DIDO1	S1714	NetworKIN	0.221009		CSNK1G1	DIDO1	S1714	NetworKIN	0.245213
		CSNK1G1	DVL3	S192	NetworKIN	-0.0458752		CSNK1G1	DVL3	S192	NetworKIN	0.057827		CSNK1G1	DVL3	S192	NetworKIN	0.402842		CSNK1G1	DVL3	S192	NetworKIN	-0.262417
		CSNK1G1	YWHAZ	S207	NetworKIN	-0.494625		CSNK1G1	YWHAZ	S207	NetworKIN	0.570137		CSNK1G1	YWHAZ	S207	NetworKIN	0.665094		CSNK1G1	YWHAZ	S207	NetworKIN	0.242573
		CSNK1G1	GSK3A	S21	NetworKIN	-0.549143		CSNK1G1	GSK3A	S21	NetworKIN	-0.0638136		CSNK1G1	GSK3A	S21	NetworKIN	0.423193		CSNK1G1	GSK3A	S21	NetworKIN	0.0381005
		CSNK1G1	FOXO1	S256	NetworKIN	-0.417025		CSNK1G1	FOXO1	S256	NetworKIN	-0.161306		CSNK1G1	FOXO1	S256	NetworKIN	0.339167		CSNK1G1	FOXO1	S256	NetworKIN	0.175884
		CSNK1G1	PPP1R14A	S26	NetworKIN	-2.23532		CSNK1G1	PPP1R14A	S26	NetworKIN	-0.184145		CSNK1G1	PPP1R14A	S26	NetworKIN	-0.00627499		CSNK1G1	PPP1R14A	S26	NetworKIN	0.382448
		CSNK1G1	FOXO1	S287	NetworKIN	-0.491937		CSNK1G1	FOXO1	S287	NetworKIN	0.173654		CSNK1G1	FOXO1	S287	NetworKIN	0.225351		CSNK1G1	FOXO1	S287	NetworKIN	-0.0751309
		CSNK1G1	GSK3A	S39	NetworKIN	-0.249046		CSNK1G1	GSK3A	S39	NetworKIN	-0.20917		CSNK1G1	GSK3A	S39	NetworKIN	0.305838		CSNK1G1	GSK3A	S39	NetworKIN	-0.211578
		CSNK1G1	HDAC3	S424	NetworKIN	-0.416101		CSNK1G1	HDAC3	S424	NetworKIN	0.254998		CSNK1G1	HDAC3	S424	NetworKIN	0.174618		CSNK1G1	HDAC3	S424	NetworKIN	0.0248345
		CSNK1G1	FOXO1	S470	NetworKIN	-0.422833		CSNK1G1	FOXO1	S470	NetworKIN	0.488398		CSNK1G1	FOXO1	S470	NetworKIN	0.242123		CSNK1G1	FOXO1	S470	NetworKIN	0.030756
		CSNK1G1	DIDO1	T1255	NetworKIN	0.0393413		CSNK1G1	DIDO1	T1255	NetworKIN	0.360602		CSNK1G1	DIDO1	T1255	NetworKIN	0.718095		CSNK1G1	DIDO1	T1255	NetworKIN	-0.0452219
		CSNK1G2	CDKN1B	S178	NetworKIN	-0.765252		CSNK1G2	CDKN1B	S178	NetworKIN	-0.0200448		CSNK1G2	CDKN1B	S178	NetworKIN	0.141546		CSNK1G2	CDKN1B	S178	NetworKIN	-0.289854
		CSNK1G2	YWHAZ	S207	NetworKIN	-0.494625		CSNK1G2	YWHAZ	S207	NetworKIN	0.570137		CSNK1G2	YWHAZ	S207	NetworKIN	0.665094		CSNK1G2	YWHAZ	S207	NetworKIN	0.242573
		CSNK1G2	FOXO1	S256	NetworKIN	-0.417025		CSNK1G2	FOXO1	S256	NetworKIN	-0.161306		CSNK1G2	FOXO1	S256	NetworKIN	0.339167		CSNK1G2	FOXO1	S256	NetworKIN	0.175884
		CSNK1G2	PPP1R14A	S26	NetworKIN	-2.23532		CSNK1G2	PPP1R14A	S26	NetworKIN	-0.184145		CSNK1G2	PPP1R14A	S26	NetworKIN	-0.00627499		CSNK1G2	PPP1R14A	S26	NetworKIN	0.382448
		CSNK1G2	FOXO1	S287	NetworKIN	-0.491937		CSNK1G2	FOXO1	S287	NetworKIN	0.173654		CSNK1G2	FOXO1	S287	NetworKIN	0.225351		CSNK1G2	FOXO1	S287	NetworKIN	-0.0751309
		CSNK1G2	FOXO1	S470	NetworKIN	-0.422833		CSNK1G2	FOXO1	S470	NetworKIN	0.488398		CSNK1G2	FOXO1	S470	NetworKIN	0.242123		CSNK1G2	FOXO1	S470	NetworKIN	0.030756
		CSNK1G2	NCK1	S85	NetworKIN	0.147193		CSNK1G2	NCK1	S85	NetworKIN	0.570691		CSNK1G2	NCK1	S85	NetworKIN	0.231727		CSNK1G2	NCK1	S85	NetworKIN	0.00109545
		CSNK1G2	NCK1	S89	NetworKIN	0.241652		CSNK1G2	NCK1	S89	NetworKIN	0.571778		CSNK1G2	NCK1	S89	NetworKIN	0.109347		CSNK1G2	NCK1	S89	NetworKIN	-0.00576668
		CSNK1G2	NCK1	S91	NetworKIN	-0.191871		CSNK1G2	NCK1	S91	NetworKIN	0.0540699		CSNK1G2	NCK1	S91	NetworKIN	0.21753		CSNK1G2	NCK1	S91	NetworKIN	0.492387
		CSNK1G3	YWHAZ	S207	NetworKIN	-0.494625		CSNK1G3	YWHAZ	S207	NetworKIN	0.570137		CSNK1G3	YWHAZ	S207	NetworKIN	0.665094		CSNK1G3	YWHAZ	S207	NetworKIN	0.242573
		CSNK1G3	FOXO1	S256	NetworKIN	-0.417025		CSNK1G3	FOXO1	S256	NetworKIN	-0.161306		CSNK1G3	FOXO1	S256	NetworKIN	0.339167		CSNK1G3	FOXO1	S256	NetworKIN	0.175884
		CSNK1G3	PPP1R14A	S26	NetworKIN	-2.23532		CSNK1G3	PPP1R14A	S26	NetworKIN	-0.184145		CSNK1G3	PPP1R14A	S26	NetworKIN	-0.00627499		CSNK1G3	PPP1R14A	S26	NetworKIN	0.382448
		CSNK1G3	FOXO1	S287	NetworKIN	-0.491937		CSNK1G3	FOXO1	S287	NetworKIN	0.173654		CSNK1G3	FOXO1	S287	NetworKIN	0.225351		CSNK1G3	FOXO1	S287	NetworKIN	-0.0751309
		CSNK1G3	FOXO1	S470	NetworKIN	-0.422833		CSNK1G3	FOXO1	S470	NetworKIN	0.488398		CSNK1G3	FOXO1	S470	NetworKIN	0.242123		CSNK1G3	FOXO1	S470	NetworKIN	0.030756
		CSNK2A1	MAP1B	S1016	NetworKIN	-1.06657		CSNK2A1	MAP1B	S1016	NetworKIN	-0.187963		CSNK2A1	MAP1B	S1016	NetworKIN	0.188534		CSNK2A1	MAP1B	S1016	NetworKIN	0.0592261
		CSNK2A1	RPLP2	S105	NetworKIN	-0.364578		CSNK2A1	RPLP2	S105	NetworKIN	0.229282		CSNK2A1	RPLP2	S105	NetworKIN	0.365796		CSNK2A1	RPLP2	S105	NetworKIN	0.0353029
		CSNK2A1	EEF1B2	S106	NetworKIN	-0.649766		CSNK2A1	EEF1B2	S106	NetworKIN	0.0976747		CSNK2A1	EEF1B2	S106	NetworKIN	0.413889		CSNK2A1	EEF1B2	S106	NetworKIN	-0.107054
		CSNK2A1	EIF5B	S107	NetworKIN	-0.384778		CSNK2A1	EIF5B	S107	NetworKIN	0.825926		CSNK2A1	EIF5B	S107	NetworKIN	0.457336		CSNK2A1	EIF5B	S107	NetworKIN	0.530592
		CSNK2A1	MYO18A	S1070	NetworKIN	0.737301		CSNK2A1	MYO18A	S1070	NetworKIN	0.952492		CSNK2A1	MYO18A	S1070	NetworKIN	-0.299872		CSNK2A1	MYO18A	S1070	NetworKIN	0.0408424
		CSNK2A1	TP53BP1	S1073	NetworKIN	-0.0419283		CSNK2A1	TP53BP1	S1073	NetworKIN	0.0558922		CSNK2A1	TP53BP1	S1073	NetworKIN	0.220768		CSNK2A1	TP53BP1	S1073	NetworKIN	-0.0987133
		CSNK2A1	EIF3J	S11	NetworKIN	-0.028939		CSNK2A1	EIF3J	S11	NetworKIN	0.118817		CSNK2A1	EIF3J	S11	NetworKIN	0.0498294		CSNK2A1	EIF3J	S11	NetworKIN	-0.0514954
		CSNK2A1	SSR3	S11	NetworKIN	0.208897		CSNK2A1	SSR3	S11	NetworKIN	0.688432		CSNK2A1	SSR3	S11	NetworKIN	0.0677738		CSNK2A1	SSR3	S11	NetworKIN	-0.0767372
		CSNK2A1	EIF5B	S113	NetworKIN	-0.645943		CSNK2A1	EIF5B	S113	NetworKIN	0.104112		CSNK2A1	EIF5B	S113	NetworKIN	0.278712		CSNK2A1	EIF5B	S113	NetworKIN	-0.0455246
		CSNK2A1	GATAD2A	S113	NetworKIN	0.0725997		CSNK2A1	GATAD2A	S113	NetworKIN	-0.158303		CSNK2A1	GATAD2A	S113	NetworKIN	0.0437316		CSNK2A1	GATAD2A	S113	NetworKIN	-0.198616
		CSNK2A1	NOS3	S1179	NetworKIN	0.0407712		CSNK2A1	NOS3	S1179	NetworKIN	-0.127781		CSNK2A1	NOS3	S1179	NetworKIN	-0.00861523		CSNK2A1	NOS3	S1179	NetworKIN	-0.227752
		CSNK2A1	CLN3	S12	NetworKIN	-0.465844		CSNK2A1	CLN3	S12	NetworKIN	-0.00444418		CSNK2A1	CLN3	S12	NetworKIN	0.434393		CSNK2A1	CLN3	S12	NetworKIN	0.0938032
		CSNK2A1	NAP1L4	S121	NetworKIN	-0.359164		CSNK2A1	NAP1L4	S121	NetworKIN	0.563025		CSNK2A1	NAP1L4	S121	NetworKIN	0.198074		CSNK2A1	NAP1L4	S121	NetworKIN	0.0668469
		CSNK2A1	IRS1	S1222	NetworKIN	-0.550182		CSNK2A1	IRS1	S1222	NetworKIN	0.0800258		CSNK2A1	IRS1	S1222	NetworKIN	-0.124302		CSNK2A1	IRS1	S1222	NetworKIN	0.000435909
		CSNK2A1	TP53BP1	S1224	NetworKIN	-0.296648		CSNK2A1	TP53BP1	S1224	NetworKIN	0.0950661		CSNK2A1	TP53BP1	S1224	NetworKIN	0.199023		CSNK2A1	TP53BP1	S1224	NetworKIN	-0.310979
		CSNK2A1	NAP1L4	S125	NetworKIN	-0.416314		CSNK2A1	NAP1L4	S125	NetworKIN	-0.0119514		CSNK2A1	NAP1L4	S125	NetworKIN	0.187293		CSNK2A1	NAP1L4	S125	NetworKIN	-0.049499
		CSNK2A1	NPM1	S125	NetworKIN	-0.535003		CSNK2A1	NPM1	S125	NetworKIN	0.0958347		CSNK2A1	NPM1	S125	NetworKIN	0.287683		CSNK2A1	NPM1	S125	NetworKIN	-0.00869317
		CSNK2A1	SUPT6H	S125	NetworKIN	-0.705603		CSNK2A1	SUPT6H	S125	NetworKIN	0.00552244		CSNK2A1	SUPT6H	S125	NetworKIN	0.392962		CSNK2A1	SUPT6H	S125	NetworKIN	-0.0944798
		CSNK2A1	TJP1	S125	NetworKIN	-0.173821		CSNK2A1	TJP1	S125	NetworKIN	0.219301		CSNK2A1	TJP1	S125	NetworKIN	0.18529		CSNK2A1	TJP1	S125	NetworKIN	0.0259255
		CSNK2A1	NES	S1286	NetworKIN	-0.114154		CSNK2A1	NES	S1286	NetworKIN	0.557348		CSNK2A1	NES	S1286	NetworKIN	0.587071		CSNK2A1	NES	S1286	NetworKIN	-0.241965
		CSNK2A1	GATAD2B	S129	NetworKIN	-0.142034		CSNK2A1	GATAD2B	S129	NetworKIN	0.0805638		CSNK2A1	GATAD2B	S129	NetworKIN	-0.0847757		CSNK2A1	GATAD2B	S129	NetworKIN	-0.175587
		CSNK2A1	GBF1	S1298	NetworKIN	0.00283392		CSNK2A1	GBF1	S1298	NetworKIN	-0.165864		CSNK2A1	GBF1	S1298	NetworKIN	-0.059116		CSNK2A1	GBF1	S1298	NetworKIN	-0.0638013
		CSNK2A1	LYN	S13	NetworKIN	-0.87172		CSNK2A1	LYN	S13	NetworKIN	0.377426		CSNK2A1	LYN	S13	NetworKIN	0.549313		CSNK2A1	LYN	S13	NetworKIN	0.203068
		CSNK2A1	TJP1	S131	NetworKIN	-0.151849		CSNK2A1	TJP1	S131	NetworKIN	0.161851		CSNK2A1	TJP1	S131	NetworKIN	0.240123		CSNK2A1	TJP1	S131	NetworKIN	-0.00187957
		CSNK2A1	GBF1	S1318	NetworKIN	-0.0118562		CSNK2A1	GBF1	S1318	NetworKIN	-0.0991312		CSNK2A1	GBF1	S1318	NetworKIN	0.08377		CSNK2A1	GBF1	S1318	NetworKIN	-0.167049
		CSNK2A1	INPPL1	S132	NetworKIN	-0.346892		CSNK2A1	INPPL1	S132	NetworKIN	0.139435		CSNK2A1	INPPL1	S132	NetworKIN	0.327169		CSNK2A1	INPPL1	S132	NetworKIN	-0.0381828
		CSNK2A1	MAP1B	S1427	NetworKIN	-0.489078		CSNK2A1	MAP1B	S1427	NetworKIN	0.42245		CSNK2A1	MAP1B	S1427	NetworKIN	0.383606		CSNK2A1	MAP1B	S1427	NetworKIN	0.149392
		CSNK2A1	SMARCA2	S1572	NetworKIN	-0.377138		CSNK2A1	SMARCA2	S1572	NetworKIN	0.261965		CSNK2A1	SMARCA2	S1572	NetworKIN	0.000379105		CSNK2A1	SMARCA2	S1572	NetworKIN	-0.0320052
		CSNK2A1	EIF5B	S164	NetworKIN	-0.446647		CSNK2A1	EIF5B	S164	NetworKIN	0.0109309		CSNK2A1	EIF5B	S164	NetworKIN	0.203677		CSNK2A1	EIF5B	S164	NetworKIN	-0.116638
		CSNK2A1	YBX1	S165	NetworKIN	0.238022		CSNK2A1	YBX1	S165	NetworKIN	0.296087		CSNK2A1	YBX1	S165	NetworKIN	0.388202		CSNK2A1	YBX1	S165	NetworKIN	-0.0981396
		CSNK2A1	GOLGB1	S17	NetworKIN	-0.1928		CSNK2A1	GOLGB1	S17	NetworKIN	0.373761		CSNK2A1	GOLGB1	S17	NetworKIN	0.460269		CSNK2A1	GOLGB1	S17	NetworKIN	0.249253
		CSNK2A1	LEO1	S179	NetworKIN	-0.414459		CSNK2A1	LEO1	S179	NetworKIN	-0.0104284		CSNK2A1	LEO1	S179	NetworKIN	0.0170071		CSNK2A1	LEO1	S179	NetworKIN	-0.223102
		CSNK2A1	ANXA2	S182	NetworKIN	-0.293562		CSNK2A1	ANXA2	S182	NetworKIN	0.12905		CSNK2A1	ANXA2	S182	NetworKIN	0.673136		CSNK2A1	ANXA2	S182	NetworKIN	0.119723
		CSNK2A1	PDAP1	S19	NetworKIN	-0.493745		CSNK2A1	PDAP1	S19	NetworKIN	0.697646		CSNK2A1	PDAP1	S19	NetworKIN	0.546066		CSNK2A1	PDAP1	S19	NetworKIN	-0.0592502
		CSNK2A1	HUWE1	S1907	NetworKIN	-0.0461979		CSNK2A1	HUWE1	S1907	NetworKIN	0.125239		CSNK2A1	HUWE1	S1907	NetworKIN	0.00630649		CSNK2A1	HUWE1	S1907	NetworKIN	-0.0293494
		CSNK2A1	DVL3	S192	NetworKIN	-0.0458752		CSNK2A1	DVL3	S192	NetworKIN	0.057827		CSNK2A1	DVL3	S192	NetworKIN	0.402842		CSNK2A1	DVL3	S192	NetworKIN	-0.262417
		CSNK2A1	MYO18A	S1942	NetworKIN	-0.184554		CSNK2A1	MYO18A	S1942	NetworKIN	0.239286		CSNK2A1	MYO18A	S1942	NetworKIN	0.253194		CSNK2A1	MYO18A	S1942	NetworKIN	0.00811084
		CSNK2A1	SERBP1	S197	NetworKIN	-0.0782634		CSNK2A1	SERBP1	S197	NetworKIN	0.257253		CSNK2A1	SERBP1	S197	NetworKIN	0.113906		CSNK2A1	SERBP1	S197	NetworKIN	-0.0184528
		CSNK2A1	MYO18A	S1970	NetworKIN	-0.323759		CSNK2A1	MYO18A	S1970	NetworKIN	0.377771		CSNK2A1	MYO18A	S1970	NetworKIN	0.227243		CSNK2A1	MYO18A	S1970	NetworKIN	0.013604
		CSNK2A1	MYO18A	S1974	NetworKIN	-0.657097		CSNK2A1	MYO18A	S1974	NetworKIN	0.141162		CSNK2A1	MYO18A	S1974	NetworKIN	0.252463		CSNK2A1	MYO18A	S1974	NetworKIN	-0.0226923
		CSNK2A1	PA2G4	S2	NetworKIN	-0.132373		CSNK2A1	PA2G4	S2	NetworKIN	0.230791		CSNK2A1	PA2G4	S2	NetworKIN	0.116089		CSNK2A1	PA2G4	S2	NetworKIN	0.0455526
		CSNK2A1	PAK2	S2	NetworKIN	-0.303244		CSNK2A1	PAK2	S2	NetworKIN	0.0574775		CSNK2A1	PAK2	S2	NetworKIN	0.144188		CSNK2A1	PAK2	S2	NetworKIN	-0.296711
		CSNK2A1	SUMO1	S2	NetworKIN	-0.816545		CSNK2A1	SUMO1	S2	NetworKIN	-0.0337032		CSNK2A1	SUMO1	S2	NetworKIN	0.391683		CSNK2A1	SUMO1	S2	NetworKIN	-0.317001
		CSNK2A1	CIR1	S202	NetworKIN	-0.525648		CSNK2A1	CIR1	S202	NetworKIN	0.2406		CSNK2A1	CIR1	S202	NetworKIN	0.596659		CSNK2A1	CIR1	S202	NetworKIN	0.192097
		CSNK2A1	PTRF	S202	NetworKIN	-0.372603		CSNK2A1	PTRF	S202	NetworKIN	0.352702		CSNK2A1	PTRF	S202	NetworKIN	0.255949		CSNK2A1	PTRF	S202	NetworKIN	0.0413826
		CSNK2A1	MYO18A	S2020	NetworKIN	-0.463167		CSNK2A1	MYO18A	S2020	NetworKIN	0.121384		CSNK2A1	MYO18A	S2020	NetworKIN	-0.0687059		CSNK2A1	MYO18A	S2020	NetworKIN	0.119627
		CSNK2A1	PTRF	S203	NetworKIN	-0.72949		CSNK2A1	PTRF	S203	NetworKIN	0.28709		CSNK2A1	PTRF	S203	NetworKIN	0.212546		CSNK2A1	PTRF	S203	NetworKIN	0.103515
		CSNK2A1	LEO1	S205	NetworKIN	-0.530445		CSNK2A1	LEO1	S205	NetworKIN	0.0510964		CSNK2A1	LEO1	S205	NetworKIN	0.140625		CSNK2A1	LEO1	S205	NetworKIN	-0.0941154
		CSNK2A1	HNRNPA2B1	S212	NetworKIN	-0.319171		CSNK2A1	HNRNPA2B1	S212	NetworKIN	0.308178		CSNK2A1	HNRNPA2B1	S212	NetworKIN	-0.15236		CSNK2A1	HNRNPA2B1	S212	NetworKIN	-0.163519
		CSNK2A1	EIF5B	S214	NetworKIN	-0.727557		CSNK2A1	EIF5B	S214	NetworKIN	0.0726457		CSNK2A1	EIF5B	S214	NetworKIN	0.368939		CSNK2A1	EIF5B	S214	NetworKIN	-0.0364756
		CSNK2A1	IWS1	S235	NetworKIN	-0.411326		CSNK2A1	IWS1	S235	NetworKIN	-0.123231		CSNK2A1	IWS1	S235	NetworKIN	0.256294		CSNK2A1	IWS1	S235	NetworKIN	-0.0186296
		CSNK2A1	IWS1	S237	NetworKIN	-0.425405		CSNK2A1	IWS1	S237	NetworKIN	-0.130944		CSNK2A1	IWS1	S237	NetworKIN	0.231619		CSNK2A1	IWS1	S237	NetworKIN	-0.0402966
		CSNK2A1	MBD3	S24	NetworKIN	-0.0120114		CSNK2A1	MBD3	S24	NetworKIN	0.441849		CSNK2A1	MBD3	S24	NetworKIN	0.450507		CSNK2A1	MBD3	S24	NetworKIN	0.056791
		CSNK2A1	PSMA3	S243	NetworKIN	-0.487006		CSNK2A1	PSMA3	S243	NetworKIN	0.0727218		CSNK2A1	PSMA3	S243	NetworKIN	0.197631		CSNK2A1	PSMA3	S243	NetworKIN	-0.0012723
		CSNK2A1	SERBP1	S25	NetworKIN	-0.489858		CSNK2A1	SERBP1	S25	NetworKIN	0.140966		CSNK2A1	SERBP1	S25	NetworKIN	0.40058		CSNK2A1	SERBP1	S25	NetworKIN	-0.4785
		CSNK2A1	SERBP1	S252	NetworKIN	0.135436		CSNK2A1	SERBP1	S252	NetworKIN	1.04205		CSNK2A1	SERBP1	S252	NetworKIN	0.304607		CSNK2A1	SERBP1	S252	NetworKIN	-0.127102
		CSNK2A1	SPTBN1	S257	NetworKIN	-0.305444		CSNK2A1	SPTBN1	S257	NetworKIN	0.0844921		CSNK2A1	SPTBN1	S257	NetworKIN	0.171245		CSNK2A1	SPTBN1	S257	NetworKIN	0.0462141
		CSNK2A1	STRN3	S257	NetworKIN	-0.294235		CSNK2A1	STRN3	S257	NetworKIN	0.155906		CSNK2A1	STRN3	S257	NetworKIN	0.282126		CSNK2A1	STRN3	S257	NetworKIN	-0.0449815
		CSNK2A1	HSP90AB1	S261	NetworKIN	-0.531376		CSNK2A1	HSP90AB1	S261	NetworKIN	0.277948		CSNK2A1	HSP90AB1	S261	NetworKIN	0.411971		CSNK2A1	HSP90AB1	S261	NetworKIN	0.106419
		CSNK2A1	RANBP2	S2668	NetworKIN	-0.554578		CSNK2A1	RANBP2	S2668	NetworKIN	0.165935		CSNK2A1	RANBP2	S2668	NetworKIN	0.244035		CSNK2A1	RANBP2	S2668	NetworKIN	-0.0381855
		CSNK2A1	CTNND1	S268	NetworKIN	-0.404501		CSNK2A1	CTNND1	S268	NetworKIN	-0.312127		CSNK2A1	CTNND1	S268	NetworKIN	0.118412		CSNK2A1	CTNND1	S268	NetworKIN	-0.0118007
		CSNK2A1	SQSTM1	S276	NetworKIN	-0.545251		CSNK2A1	SQSTM1	S276	NetworKIN	0.146127		CSNK2A1	SQSTM1	S276	NetworKIN	0.458734		CSNK2A1	SQSTM1	S276	NetworKIN	0.25006
		CSNK2A1	SQSTM1	S277	NetworKIN	-0.431583		CSNK2A1	SQSTM1	S277	NetworKIN	-0.325884		CSNK2A1	SQSTM1	S277	NetworKIN	0.855287		CSNK2A1	SQSTM1	S277	NetworKIN	-0.151042
		CSNK2A1	RANBP2	S2900	NetworKIN	-0.259185		CSNK2A1	RANBP2	S2900	NetworKIN	0.448406		CSNK2A1	RANBP2	S2900	NetworKIN	0.666555		CSNK2A1	RANBP2	S2900	NetworKIN	0.150787
		CSNK2A1	VAMP4	S30	NetworKIN	-0.300813		CSNK2A1	VAMP4	S30	NetworKIN	0.088401		CSNK2A1	VAMP4	S30	NetworKIN	0.238161		CSNK2A1	VAMP4	S30	NetworKIN	0.0165529
		CSNK2A1	IWS1	S300	NetworKIN	-0.243582		CSNK2A1	IWS1	S300	NetworKIN	0.154367		CSNK2A1	IWS1	S300	NetworKIN	0.692346		CSNK2A1	IWS1	S300	NetworKIN	0.0193084
		CSNK2A1	GTF2F1	S307	NetworKIN	-0.249161		CSNK2A1	GTF2F1	S307	NetworKIN	-0.00086235		CSNK2A1	GTF2F1	S307	NetworKIN	0.378685		CSNK2A1	GTF2F1	S307	NetworKIN	0.0451874
		CSNK2A1	SERBP1	S328	NetworKIN	-0.201495		CSNK2A1	SERBP1	S328	NetworKIN	0.648908		CSNK2A1	SERBP1	S328	NetworKIN	0.140324		CSNK2A1	SERBP1	S328	NetworKIN	-0.00700833
		CSNK2A1	IRS1	S330	NetworKIN	-0.0270253		CSNK2A1	IRS1	S330	NetworKIN	0.221561		CSNK2A1	IRS1	S330	NetworKIN	-0.141524		CSNK2A1	IRS1	S330	NetworKIN	0.330103
		CSNK2A1	SERBP1	S330	NetworKIN	0.272322		CSNK2A1	SERBP1	S330	NetworKIN	0.898883		CSNK2A1	SERBP1	S330	NetworKIN	0.0820288		CSNK2A1	SERBP1	S330	NetworKIN	-0.0770999
		CSNK2A1	SQSTM1	S332	NetworKIN	-0.380297		CSNK2A1	SQSTM1	S332	NetworKIN	0.0682189		CSNK2A1	SQSTM1	S332	NetworKIN	0.172952		CSNK2A1	SQSTM1	S332	NetworKIN	0.0141704
		CSNK2A1	LRRFIP2	S333	NetworKIN	-0.246097		CSNK2A1	LRRFIP2	S333	NetworKIN	0.458775		CSNK2A1	LRRFIP2	S333	NetworKIN	0.241063		CSNK2A1	LRRFIP2	S333	NetworKIN	0.0925238
		CSNK2A1	SERBP1	S338	NetworKIN	0.379248		CSNK2A1	SERBP1	S338	NetworKIN	1.16046		CSNK2A1	SERBP1	S338	NetworKIN	0.326787		CSNK2A1	SERBP1	S338	NetworKIN	-0.173159
		CSNK2A1	HNRNPA2B1	S344	NetworKIN	0.0436245		CSNK2A1	HNRNPA2B1	S344	NetworKIN	-0.0125605		CSNK2A1	HNRNPA2B1	S344	NetworKIN	0.0579105		CSNK2A1	HNRNPA2B1	S344	NetworKIN	-0.540065
		CSNK2A1	PCYT1A	S362	NetworKIN	-0.0877105		CSNK2A1	PCYT1A	S362	NetworKIN	-0.168145		CSNK2A1	PCYT1A	S362	NetworKIN	0.107214		CSNK2A1	PCYT1A	S362	NetworKIN	0.06689
		CSNK2A1	IWS1	S363	NetworKIN	-0.357168		CSNK2A1	IWS1	S363	NetworKIN	0.210909		CSNK2A1	IWS1	S363	NetworKIN	0.142673		CSNK2A1	IWS1	S363	NetworKIN	0.108484
		CSNK2A1	IWS1	S365	NetworKIN	-0.344228		CSNK2A1	IWS1	S365	NetworKIN	0.231529		CSNK2A1	IWS1	S365	NetworKIN	0.168628		CSNK2A1	IWS1	S365	NetworKIN	0.156994
		CSNK2A1	CAV1	S37	NetworKIN	-0.463054		CSNK2A1	CAV1	S37	NetworKIN	0.146723		CSNK2A1	CAV1	S37	NetworKIN	0.153348		CSNK2A1	CAV1	S37	NetworKIN	-0.0553476
		CSNK2A1	RB1	S37	NetworKIN	-0.190303		CSNK2A1	RB1	S37	NetworKIN	0.329255		CSNK2A1	RB1	S37	NetworKIN	0.377733		CSNK2A1	RB1	S37	NetworKIN	0.222403
		CSNK2A1	PTRF	S379	NetworKIN	-0.564183		CSNK2A1	PTRF	S379	NetworKIN	0.428811		CSNK2A1	PTRF	S379	NetworKIN	0.15545		CSNK2A1	PTRF	S379	NetworKIN	0.198573
		CSNK2A1	EIF3C	S39	NetworKIN	-0.365832		CSNK2A1	EIF3C	S39	NetworKIN	0.0971073		CSNK2A1	EIF3C	S39	NetworKIN	0.21647		CSNK2A1	EIF3C	S39	NetworKIN	-0.0274892
		CSNK2A1	HDAC1	S393	NetworKIN	-0.535049		CSNK2A1	HDAC1	S393	NetworKIN	0.0270764		CSNK2A1	HDAC1	S393	NetworKIN	0.202641		CSNK2A1	HDAC1	S393	NetworKIN	0.0174936
		CSNK2A1	CTNND1	S4	NetworKIN	0.139553		CSNK2A1	CTNND1	S4	NetworKIN	0.225881		CSNK2A1	CTNND1	S4	NetworKIN	-0.114091		CSNK2A1	CTNND1	S4	NetworKIN	0.307223
		CSNK2A1	CHD4	S428	NetworKIN	-0.106361		CSNK2A1	CHD4	S428	NetworKIN	0.283246		CSNK2A1	CHD4	S428	NetworKIN	0.475437		CSNK2A1	CHD4	S428	NetworKIN	0.0344901
		CSNK2A1	DKC1	S453	NetworKIN	-0.375831		CSNK2A1	DKC1	S453	NetworKIN	0.823685		CSNK2A1	DKC1	S453	NetworKIN	0.66825		CSNK2A1	DKC1	S453	NetworKIN	-0.1368
		CSNK2A1	EEF2K	S470	NetworKIN	-0.45584		CSNK2A1	EEF2K	S470	NetworKIN	-0.51514		CSNK2A1	EEF2K	S470	NetworKIN	0.211905		CSNK2A1	EEF2K	S470	NetworKIN	-0.0364565
		CSNK2A1	NEFL	S472	NetworKIN	-0.230856		CSNK2A1	NEFL	S472	NetworKIN	0.98924		CSNK2A1	NEFL	S472	NetworKIN	0.778308		CSNK2A1	NEFL	S472	NetworKIN	0.00152455
		CSNK2A1	NES	S475	NetworKIN	-0.140277		CSNK2A1	NES	S475	NetworKIN	0.00975472		CSNK2A1	NES	S475	NetworKIN	0.757076		CSNK2A1	NES	S475	NetworKIN	-0.391863
		CSNK2A1	PPP1R3A	S48	NetworKIN	-0.293158		CSNK2A1	PPP1R3A	S48	NetworKIN	-0.105707		CSNK2A1	PPP1R3A	S48	NetworKIN	0.111095		CSNK2A1	PPP1R3A	S48	NetworKIN	-0.000904266
		CSNK2A1	DKC1	S494	NetworKIN	-0.402946		CSNK2A1	DKC1	S494	NetworKIN	0.0796007		CSNK2A1	DKC1	S494	NetworKIN	0.324487		CSNK2A1	DKC1	S494	NetworKIN	-0.139494
		CSNK2A1	NAP1L4	S5	NetworKIN	-0.766135		CSNK2A1	NAP1L4	S5	NetworKIN	0.228944		CSNK2A1	NAP1L4	S5	NetworKIN	0.487889		CSNK2A1	NAP1L4	S5	NetworKIN	0.0515834
		CSNK2A1	PML	S504	NetworKIN	-0.184441		CSNK2A1	PML	S504	NetworKIN	0.249706		CSNK2A1	PML	S504	NetworKIN	0.422576		CSNK2A1	PML	S504	NetworKIN	-0.0821662
		CSNK2A1	NOP56	S520	NetworKIN	-0.244176		CSNK2A1	NOP56	S520	NetworKIN	0.212309		CSNK2A1	NOP56	S520	NetworKIN	0.229172		CSNK2A1	NOP56	S520	NetworKIN	-0.0749552
		CSNK2A1	EEF1D	S528	NetworKIN	-0.507661		CSNK2A1	EEF1D	S528	NetworKIN	0.124343		CSNK2A1	EEF1D	S528	NetworKIN	0.501225		CSNK2A1	EEF1D	S528	NetworKIN	0.0275461
		CSNK2A1	HDAC4	S565	NetworKIN	0.115336		CSNK2A1	HDAC4	S565	NetworKIN	0.395555		CSNK2A1	HDAC4	S565	NetworKIN	0.267743		CSNK2A1	HDAC4	S565	NetworKIN	-0.125586
		CSNK2A1	NOP56	S570	NetworKIN	-0.320594		CSNK2A1	NOP56	S570	NetworKIN	0.193518		CSNK2A1	NOP56	S570	NetworKIN	0.43712		CSNK2A1	NOP56	S570	NetworKIN	-0.0626355
		CSNK2A1	NES	S578	NetworKIN	-0.15228		CSNK2A1	NES	S578	NetworKIN	0.286605		CSNK2A1	NES	S578	NetworKIN	0.941783		CSNK2A1	NES	S578	NetworKIN	-0.151015
		CSNK2A1	PAK2	S58	NetworKIN	-0.160726		CSNK2A1	PAK2	S58	NetworKIN	1.7767		CSNK2A1	PAK2	S58	NetworKIN	0.210934		CSNK2A1	PAK2	S58	NetworKIN	0.193328
		CSNK2A1	PDAP1	S60	NetworKIN	-0.453171		CSNK2A1	PDAP1	S60	NetworKIN	-0.157707		CSNK2A1	PDAP1	S60	NetworKIN	-0.028072		CSNK2A1	PDAP1	S60	NetworKIN	-0.49282
		CSNK2A1	PRPF3	S619	NetworKIN	-0.591709		CSNK2A1	PRPF3	S619	NetworKIN	0.134878		CSNK2A1	PRPF3	S619	NetworKIN	0.533047		CSNK2A1	PRPF3	S619	NetworKIN	-0.205733
		CSNK2A1	PDAP1	S63	NetworKIN	-0.326363		CSNK2A1	PDAP1	S63	NetworKIN	-0.0598838		CSNK2A1	PDAP1	S63	NetworKIN	0.0594847		CSNK2A1	PDAP1	S63	NetworKIN	-0.238844
		CSNK2A1	CTNNA3	S637	NetworKIN	0.196956		CSNK2A1	CTNNA3	S637	NetworKIN	0.13199		CSNK2A1	CTNNA3	S637	NetworKIN	0.0397555		CSNK2A1	CTNNA3	S637	NetworKIN	-0.0300828
		CSNK2A1	NAP1L4	S7	NetworKIN	0.0449157		CSNK2A1	NAP1L4	S7	NetworKIN	-0.125506		CSNK2A1	NAP1L4	S7	NetworKIN	0.0127483		CSNK2A1	NAP1L4	S7	NetworKIN	-0.2034
		CSNK2A1	VCL	S721	NetworKIN	-0.905743		CSNK2A1	VCL	S721	NetworKIN	0.860026		CSNK2A1	VCL	S721	NetworKIN	0.129287		CSNK2A1	VCL	S721	NetworKIN	0.237827
		CSNK2A1	PRKAR2A	S78	NetworKIN	-0.334124		CSNK2A1	PRKAR2A	S78	NetworKIN	0.163518		CSNK2A1	PRKAR2A	S78	NetworKIN	0.130566		CSNK2A1	PRKAR2A	S78	NetworKIN	0.0710053
		CSNK2A1	EMD	S8	NetworKIN	-1.01121		CSNK2A1	EMD	S8	NetworKIN	0.101847		CSNK2A1	EMD	S8	NetworKIN	-0.00175196		CSNK2A1	EMD	S8	NetworKIN	0.530652
		CSNK2A1	IWS1	S80	NetworKIN	0.0507746		CSNK2A1	IWS1	S80	NetworKIN	-0.0597137		CSNK2A1	IWS1	S80	NetworKIN	0.357871		CSNK2A1	IWS1	S80	NetworKIN	0.00589215
		CSNK2A1	PRKAR2A	S80	NetworKIN	-0.182898		CSNK2A1	PRKAR2A	S80	NetworKIN	0.127132		CSNK2A1	PRKAR2A	S80	NetworKIN	0.0832369		CSNK2A1	PRKAR2A	S80	NetworKIN	0.0238706
		CSNK2A1	CTNND1	S847	NetworKIN	-0.00901652		CSNK2A1	CTNND1	S847	NetworKIN	0.200791		CSNK2A1	CTNND1	S847	NetworKIN	0.373288		CSNK2A1	CTNND1	S847	NetworKIN	0.122302
		CSNK2A1	CTNND1	S864	NetworKIN	-0.0511112		CSNK2A1	CTNND1	S864	NetworKIN	0.232097		CSNK2A1	CTNND1	S864	NetworKIN	0.0895383		CSNK2A1	CTNND1	S864	NetworKIN	0.0297404
		CSNK2A1	CTNND1	S868	NetworKIN	-0.526405		CSNK2A1	CTNND1	S868	NetworKIN	-0.21649		CSNK2A1	CTNND1	S868	NetworKIN	0.0203878		CSNK2A1	CTNND1	S868	NetworKIN	-0.011792
		CSNK2A1	EEF1B2	S90	NetworKIN	-0.789506		CSNK2A1	EEF1B2	S90	NetworKIN	0.291506		CSNK2A1	EEF1B2	S90	NetworKIN	0.76578		CSNK2A1	EEF1B2	S90	NetworKIN	0.150633
		CSNK2A1	CTNND1	S920	NetworKIN	-1.01323		CSNK2A1	CTNND1	S920	NetworKIN	-0.244811		CSNK2A1	CTNND1	S920	NetworKIN	0.757792		CSNK2A1	CTNND1	S920	NetworKIN	0.148452
		CSNK2A1	BNIP3	S93	NetworKIN	-0.12656		CSNK2A1	BNIP3	S93	NetworKIN	0.135727		CSNK2A1	BNIP3	S93	NetworKIN	0.0576519		CSNK2A1	BNIP3	S93	NetworKIN	-0.111851
		CSNK2A1	MAP1B	S937	NetworKIN	-1.83418		CSNK2A1	MAP1B	S937	NetworKIN	0.678133		CSNK2A1	MAP1B	S937	NetworKIN	-0.17738		CSNK2A1	MAP1B	S937	NetworKIN	0.122486
		CSNK2A1	EEF1B2	S95	NetworKIN	-0.362552		CSNK2A1	EEF1B2	S95	NetworKIN	-0.0176819		CSNK2A1	EEF1B2	S95	NetworKIN	0.151455		CSNK2A1	EEF1B2	S95	NetworKIN	-0.267177
		CSNK2A1	CTR9	S970	NetworKIN	-0.269157		CSNK2A1	CTR9	S970	NetworKIN	0.473199		CSNK2A1	CTR9	S970	NetworKIN	0.651773		CSNK2A1	CTR9	S970	NetworKIN	-0.206744
		CSNK2A1	MAP1B	S995	NetworKIN	-1.08638		CSNK2A1	MAP1B	S995	NetworKIN	0.696309		CSNK2A1	MAP1B	S995	NetworKIN	0.432385		CSNK2A1	MAP1B	S995	NetworKIN	0.381543
		CSNK2A1	EIF2S2	T111	NetworKIN	0.0127349		CSNK2A1	EIF2S2	T111	NetworKIN	-0.0895508		CSNK2A1	EIF2S2	T111	NetworKIN	0.241284		CSNK2A1	EIF2S2	T111	NetworKIN	0.0619264
		CSNK2A1	PAK2	T169	NetworKIN	-0.155907		CSNK2A1	PAK2	T169	NetworKIN	-0.0423419		CSNK2A1	PAK2	T169	NetworKIN	0.134837		CSNK2A1	PAK2	T169	NetworKIN	-0.120414
		CSNK2A1	RANBP2	T2293	NetworKIN	-0.0172852		CSNK2A1	RANBP2	T2293	NetworKIN	-0.102301		CSNK2A1	RANBP2	T2293	NetworKIN	0.0929413		CSNK2A1	RANBP2	T2293	NetworKIN	0.0113576
		CSNK2A1	CAMK2D	T336	NetworKIN	-0.362752		CSNK2A1	CAMK2D	T336	NetworKIN	0.179348		CSNK2A1	CAMK2D	T336	NetworKIN	0.253256		CSNK2A1	CAMK2D	T336	NetworKIN	-0.241091
		CSNK2A1	EIF4EBP1	T36	NetworKIN	-1.22295		CSNK2A1	EIF4EBP1	T36	NetworKIN	-0.591305		CSNK2A1	EIF4EBP1	T36	NetworKIN	0.202765		CSNK2A1	EIF4EBP1	T36	NetworKIN	0.055227
		CSNK2A1	CAMK2B	T400	NetworKIN	-0.237087		CSNK2A1	CAMK2B	T400	NetworKIN	0.230772		CSNK2A1	CAMK2B	T400	NetworKIN	0.397914		CSNK2A1	CAMK2B	T400	NetworKIN	-0.176592
		CSNK2A1	CTNNA1	T658	NetworKIN	-0.29486		CSNK2A1	CTNNA1	T658	NetworKIN	0.026222		CSNK2A1	CTNNA1	T658	NetworKIN	0.340899		CSNK2A1	CTNNA1	T658	NetworKIN	-0.0939826
		CSNK2A1	CTR9	T925	NetworKIN	-0.432408		CSNK2A1	CTR9	T925	NetworKIN	0.142768		CSNK2A1	CTR9	T925	NetworKIN	0.36963		CSNK2A1	CTR9	T925	NetworKIN	-0.0750275
		CSNK2A1	EEF1B2	T93	NetworKIN	-0.605958		CSNK2A1	EEF1B2	T93	NetworKIN	0.237476		CSNK2A1	EEF1B2	T93	NetworKIN	0.606281		CSNK2A1	EEF1B2	T93	NetworKIN	0.123902
		CSNK2A2	EIF4EBP1	S101	NetworKIN	-0.266616		CSNK2A2	EIF4EBP1	S101	NetworKIN	-0.00638354		CSNK2A2	EIF4EBP1	S101	NetworKIN	0.127475		CSNK2A2	EIF4EBP1	S101	NetworKIN	0.0756034
		CSNK2A2	MAP1B	S1016	NetworKIN	-1.06657		CSNK2A2	MAP1B	S1016	NetworKIN	-0.187963		CSNK2A2	MAP1B	S1016	NetworKIN	0.188534		CSNK2A2	MAP1B	S1016	NetworKIN	0.0592261
		CSNK2A2	EEF1B2	S106	NetworKIN	-0.649766		CSNK2A2	EEF1B2	S106	NetworKIN	0.0976747		CSNK2A2	EEF1B2	S106	NetworKIN	0.413889		CSNK2A2	EEF1B2	S106	NetworKIN	-0.107054
		CSNK2A2	EIF3J	S11	NetworKIN	-0.028939		CSNK2A2	EIF3J	S11	NetworKIN	0.118817		CSNK2A2	EIF3J	S11	NetworKIN	0.0498294		CSNK2A2	EIF3J	S11	NetworKIN	-0.0514954
		CSNK2A2	NAP1L4	S121	NetworKIN	-0.359164		CSNK2A2	NAP1L4	S121	NetworKIN	0.563025		CSNK2A2	NAP1L4	S121	NetworKIN	0.198074		CSNK2A2	NAP1L4	S121	NetworKIN	0.0668469
		CSNK2A2	PPP1R2	S121	NetworKIN	-0.0561437		CSNK2A2	PPP1R2	S121	NetworKIN	0.198228		CSNK2A2	PPP1R2	S121	NetworKIN	0.13907		CSNK2A2	PPP1R2	S121	NetworKIN	0.1577
		CSNK2A2	PPP1R2	S122	NetworKIN	0.0223782		CSNK2A2	PPP1R2	S122	NetworKIN	0.325605		CSNK2A2	PPP1R2	S122	NetworKIN	0.176902		CSNK2A2	PPP1R2	S122	NetworKIN	0.158594
		CSNK2A2	NAP1L4	S125	NetworKIN	-0.416314		CSNK2A2	NAP1L4	S125	NetworKIN	-0.0119514		CSNK2A2	NAP1L4	S125	NetworKIN	0.187293		CSNK2A2	NAP1L4	S125	NetworKIN	-0.049499
		CSNK2A2	NPM1	S125	NetworKIN	-0.535003		CSNK2A2	NPM1	S125	NetworKIN	0.0958347		CSNK2A2	NPM1	S125	NetworKIN	0.287683		CSNK2A2	NPM1	S125	NetworKIN	-0.00869317
		CSNK2A2	MAP1B	S1265	NetworKIN	-0.231074		CSNK2A2	MAP1B	S1265	NetworKIN	0.365886		CSNK2A2	MAP1B	S1265	NetworKIN	0.245004		CSNK2A2	MAP1B	S1265	NetworKIN	0.172535
		CSNK2A2	EIF3J	S127	NetworKIN	-0.350259		CSNK2A2	EIF3J	S127	NetworKIN	0.0574188		CSNK2A2	EIF3J	S127	NetworKIN	0.174686		CSNK2A2	EIF3J	S127	NetworKIN	0.0293693
		CSNK2A2	MAP1B	S1389	NetworKIN	-1.2018		CSNK2A2	MAP1B	S1389	NetworKIN	0.390225		CSNK2A2	MAP1B	S1389	NetworKIN	-0.0347509		CSNK2A2	MAP1B	S1389	NetworKIN	0.508869
		CSNK2A2	MAP1B	S1427	NetworKIN	-0.489078		CSNK2A2	MAP1B	S1427	NetworKIN	0.42245		CSNK2A2	MAP1B	S1427	NetworKIN	0.383606		CSNK2A2	MAP1B	S1427	NetworKIN	0.149392
		CSNK2A2	MAP1B	S1501	NetworKIN	-0.254099		CSNK2A2	MAP1B	S1501	NetworKIN	0.553985		CSNK2A2	MAP1B	S1501	NetworKIN	0.452864		CSNK2A2	MAP1B	S1501	NetworKIN	0.164316
		CSNK2A2	MAP1B	S1819	NetworKIN	-0.891206		CSNK2A2	MAP1B	S1819	NetworKIN	0.226501		CSNK2A2	MAP1B	S1819	NetworKIN	0.0934097		CSNK2A2	MAP1B	S1819	NetworKIN	0.0175228
		CSNK2A2	MAP1B	S1915	NetworKIN	-0.241206		CSNK2A2	MAP1B	S1915	NetworKIN	0.052014		CSNK2A2	MAP1B	S1915	NetworKIN	0.0933937		CSNK2A2	MAP1B	S1915	NetworKIN	0.141555
		CSNK2A2	DVL3	S192	NetworKIN	-0.0458752		CSNK2A2	DVL3	S192	NetworKIN	0.057827		CSNK2A2	DVL3	S192	NetworKIN	0.402842		CSNK2A2	DVL3	S192	NetworKIN	-0.262417
		CSNK2A2	EIF2S2	S2	NetworKIN	-0.149912		CSNK2A2	EIF2S2	S2	NetworKIN	0.0584529		CSNK2A2	EIF2S2	S2	NetworKIN	0.108725		CSNK2A2	EIF2S2	S2	NetworKIN	0.00290924
		CSNK2A2	CAV1	S37	NetworKIN	-0.463054		CSNK2A2	CAV1	S37	NetworKIN	0.146723		CSNK2A2	CAV1	S37	NetworKIN	0.153348		CSNK2A2	CAV1	S37	NetworKIN	-0.0553476
		CSNK2A2	PTEN	S370	NetworKIN	-0.0744926		CSNK2A2	PTEN	S370	NetworKIN	-0.233679		CSNK2A2	PTEN	S370	NetworKIN	0.633936		CSNK2A2	PTEN	S370	NetworKIN	0.369794
		CSNK2A2	EIF3C	S39	NetworKIN	-0.365832		CSNK2A2	EIF3C	S39	NetworKIN	0.0971073		CSNK2A2	EIF3C	S39	NetworKIN	0.21647		CSNK2A2	EIF3C	S39	NetworKIN	-0.0274892
		CSNK2A2	HDAC1	S393	NetworKIN	-0.535049		CSNK2A2	HDAC1	S393	NetworKIN	0.0270764		CSNK2A2	HDAC1	S393	NetworKIN	0.202641		CSNK2A2	HDAC1	S393	NetworKIN	0.0174936
		CSNK2A2	XRCC1	S446	NetworKIN	-1.35147		CSNK2A2	XRCC1	S446	NetworKIN	-0.162166		CSNK2A2	XRCC1	S446	NetworKIN	0.635918		CSNK2A2	XRCC1	S446	NetworKIN	-0.162179
		CSNK2A2	NAP1L4	S5	NetworKIN	-0.766135		CSNK2A2	NAP1L4	S5	NetworKIN	0.228944		CSNK2A2	NAP1L4	S5	NetworKIN	0.487889		CSNK2A2	NAP1L4	S5	NetworKIN	0.0515834
		CSNK2A2	MAP1B	S541	NetworKIN	-1.10008		CSNK2A2	MAP1B	S541	NetworKIN	0.789814		CSNK2A2	MAP1B	S541	NetworKIN	0.525507		CSNK2A2	MAP1B	S541	NetworKIN	0.526419
		CSNK2A2	NAP1L4	S7	NetworKIN	0.0449157		CSNK2A2	NAP1L4	S7	NetworKIN	-0.125506		CSNK2A2	NAP1L4	S7	NetworKIN	0.0127483		CSNK2A2	NAP1L4	S7	NetworKIN	-0.2034
		CSNK2A2	PPP1R2	S77	NetworKIN	0.147756		CSNK2A2	PPP1R2	S77	NetworKIN	-0.0767107		CSNK2A2	PPP1R2	S77	NetworKIN	-0.137344		CSNK2A2	PPP1R2	S77	NetworKIN	-0.262954
		CSNK2A2	MAP1B	S828	NetworKIN	-0.251774		CSNK2A2	MAP1B	S828	NetworKIN	0.413028		CSNK2A2	MAP1B	S828	NetworKIN	0.53591		CSNK2A2	MAP1B	S828	NetworKIN	0.0704422
		CSNK2A2	PPP1R2	S87	NetworKIN	-0.00560038		CSNK2A2	PPP1R2	S87	NetworKIN	-0.0923763		CSNK2A2	PPP1R2	S87	NetworKIN	0.0604324		CSNK2A2	PPP1R2	S87	NetworKIN	-0.0387553
		CSNK2A2	EEF1B2	S90	NetworKIN	-0.789506		CSNK2A2	EEF1B2	S90	NetworKIN	0.291506		CSNK2A2	EEF1B2	S90	NetworKIN	0.76578		CSNK2A2	EEF1B2	S90	NetworKIN	0.150633
		CSNK2A2	MAP1B	S937	NetworKIN	-1.83418		CSNK2A2	MAP1B	S937	NetworKIN	0.678133		CSNK2A2	MAP1B	S937	NetworKIN	-0.17738		CSNK2A2	MAP1B	S937	NetworKIN	0.122486
		CSNK2A2	EEF1B2	S95	NetworKIN	-0.362552		CSNK2A2	EEF1B2	S95	NetworKIN	-0.0176819		CSNK2A2	EEF1B2	S95	NetworKIN	0.151455		CSNK2A2	EEF1B2	S95	NetworKIN	-0.267177
		CSNK2A2	MAP1B	S995	NetworKIN	-1.08638		CSNK2A2	MAP1B	S995	NetworKIN	0.696309		CSNK2A2	MAP1B	S995	NetworKIN	0.432385		CSNK2A2	MAP1B	S995	NetworKIN	0.381543
		CSNK2A2	EIF2S2	T111	NetworKIN	0.0127349		CSNK2A2	EIF2S2	T111	NetworKIN	-0.0895508		CSNK2A2	EIF2S2	T111	NetworKIN	0.241284		CSNK2A2	EIF2S2	T111	NetworKIN	0.0619264
		CSNK2A2	MAP1B	T1503	NetworKIN	-0.269203		CSNK2A2	MAP1B	T1503	NetworKIN	0.334314		CSNK2A2	MAP1B	T1503	NetworKIN	-0.0316029		CSNK2A2	MAP1B	T1503	NetworKIN	0.0393644
		CSNK2A2	EIF4EBP1	T36	NetworKIN	-1.22295		CSNK2A2	EIF4EBP1	T36	NetworKIN	-0.591305		CSNK2A2	EIF4EBP1	T36	NetworKIN	0.202765		CSNK2A2	EIF4EBP1	T36	NetworKIN	0.055227
		CSNK2A2	XRCC1	T453	NetworKIN	-0.995313		CSNK2A2	XRCC1	T453	NetworKIN	0.0140948		CSNK2A2	XRCC1	T453	NetworKIN	0.601803		CSNK2A2	XRCC1	T453	NetworKIN	-0.212166
		CSNK2A2	CTNNB1	T551	NetworKIN	0.0248789		CSNK2A2	CTNNB1	T551	NetworKIN	0.415619		CSNK2A2	CTNNB1	T551	NetworKIN	0.105122		CSNK2A2	CTNNB1	T551	NetworKIN	-0.0124792
		CSNK2A2	EEF1B2	T93	NetworKIN	-0.605958		CSNK2A2	EEF1B2	T93	NetworKIN	0.237476		CSNK2A2	EEF1B2	T93	NetworKIN	0.606281		CSNK2A2	EEF1B2	T93	NetworKIN	0.123902
		DAPK1	TSC2	T1462	NetworKIN	0.0392118		DAPK1	TSC2	T1462	NetworKIN	0.223093		DAPK1	TSC2	T1462	NetworKIN	0.100408		DAPK1	TSC2	T1462	NetworKIN	-0.0246047
		DAPK1	MAP1B	T1503	NetworKIN	-0.269203		DAPK1	MAP1B	T1503	NetworKIN	0.334314		DAPK1	MAP1B	T1503	NetworKIN	-0.0316029		DAPK1	MAP1B	T1503	NetworKIN	0.0393644
		DAPK1	MAPK1	T185	NetworKIN	0.577583		DAPK1	MAPK1	T185	NetworKIN	0.291315		DAPK1	MAPK1	T185	NetworKIN	0.0295839		DAPK1	MAPK1	T185	NetworKIN	-0.341029
		DAPK1	MAPK1	T190	NetworKIN	-0.183651		DAPK1	MAPK1	T190	NetworKIN	0.217473		DAPK1	MAPK1	T190	NetworKIN	0.0605159		DAPK1	MAPK1	T190	NetworKIN	0.123523
		DAPK2	MAPK1	T185	NetworKIN	0.577583		DAPK2	MAPK1	T185	NetworKIN	0.291315		DAPK2	MAPK1	T185	NetworKIN	0.0295839		DAPK2	MAPK1	T185	NetworKIN	-0.341029
		DAPK2	MAPK1	T190	NetworKIN	-0.183651		DAPK2	MAPK1	T190	NetworKIN	0.217473		DAPK2	MAPK1	T190	NetworKIN	0.0605159		DAPK2	MAPK1	T190	NetworKIN	0.123523
		DAPK3	MAPK1	T185	NetworKIN	0.577583		DAPK3	MAPK1	T185	NetworKIN	0.291315		DAPK3	MAPK1	T185	NetworKIN	0.0295839		DAPK3	MAPK1	T185	NetworKIN	-0.341029
		DAPK3	MAPK1	T190	NetworKIN	-0.183651		DAPK3	MAPK1	T190	NetworKIN	0.217473		DAPK3	MAPK1	T190	NetworKIN	0.0605159		DAPK3	MAPK1	T190	NetworKIN	0.123523
		DAPK3	CDC5L	T385	NetworKIN	-0.392209		DAPK3	CDC5L	T385	NetworKIN	0.131912		DAPK3	CDC5L	T385	NetworKIN	0.0621706		DAPK3	CDC5L	T385	NetworKIN	0.311571
		DAPK3	CDC5L	T396	NetworKIN	-0.381902		DAPK3	CDC5L	T396	NetworKIN	0.158452		DAPK3	CDC5L	T396	NetworKIN	0.0738193		DAPK3	CDC5L	T396	NetworKIN	0.315931
		DMPK	CKM	S128	NetworKIN	0.0750169		DMPK	CKM	S128	NetworKIN	-0.0564649		DMPK	CKM	S128	NetworKIN	-0.0614135		DMPK	CKM	S128	NetworKIN	-0.000700274
		DMPK	HSPB1	S15	NetworKIN	1.34119		DMPK	HSPB1	S15	NetworKIN	1.87711		DMPK	HSPB1	S15	NetworKIN	-0.573784		DMPK	HSPB1	S15	NetworKIN	1.55372
		DMPK	CRYAB	S153	NetworKIN	0.0482045		DMPK	CRYAB	S153	NetworKIN	-0.195745		DMPK	CRYAB	S153	NetworKIN	-0.0534792		DMPK	CRYAB	S153	NetworKIN	0.0378321
		DMPK	FTH1	S179	NetworKIN	-0.243802		DMPK	FTH1	S179	NetworKIN	0.158755		DMPK	FTH1	S179	NetworKIN	0.109636		DMPK	FTH1	S179	NetworKIN	-0.0459629
		DMPK	FTH1	S183	NetworKIN	-0.132222		DMPK	FTH1	S183	NetworKIN	0.165988		DMPK	FTH1	S183	NetworKIN	0.0151125		DMPK	FTH1	S183	NetworKIN	-0.0953539
		DMPK	CRYAB	S19	NetworKIN	0.297351		DMPK	CRYAB	S19	NetworKIN	0.166106		DMPK	CRYAB	S19	NetworKIN	-0.0320751		DMPK	CRYAB	S19	NetworKIN	0.741818
		DMPK	HSPB1	S199	NetworKIN	-0.567885		DMPK	HSPB1	S199	NetworKIN	0.101556		DMPK	HSPB1	S199	NetworKIN	0.201722		DMPK	HSPB1	S199	NetworKIN	0.380848
		DMPK	CRYAB	S21	NetworKIN	0.514844		DMPK	CRYAB	S21	NetworKIN	0.522556		DMPK	CRYAB	S21	NetworKIN	0.0799333		DMPK	CRYAB	S21	NetworKIN	0.392073
		DMPK	QDPR	S223	NetworKIN	-0.0996794		DMPK	QDPR	S223	NetworKIN	-0.0401568		DMPK	QDPR	S223	NetworKIN	0.142118		DMPK	QDPR	S223	NetworKIN	0.0805215
		DMPK	RAF1	S233	NetworKIN	-0.0872978		DMPK	RAF1	S233	NetworKIN	0.403251		DMPK	RAF1	S233	NetworKIN	0.6079		DMPK	RAF1	S233	NetworKIN	-0.294329
		DMPK	RAF1	S259	NetworKIN	-0.209507		DMPK	RAF1	S259	NetworKIN	0.134276		DMPK	RAF1	S259	NetworKIN	0.0495004		DMPK	RAF1	S259	NetworKIN	0.0638142
		DMPK	SLC4A1	S350	NetworKIN	-1.25263		DMPK	SLC4A1	S350	NetworKIN	0.214913		DMPK	SLC4A1	S350	NetworKIN	-0.868434		DMPK	SLC4A1	S350	NetworKIN	0.285258
		DMPK	GJA1	S364	NetworKIN	-0.396878		DMPK	GJA1	S364	NetworKIN	0.120775		DMPK	GJA1	S364	NetworKIN	-0.163518		DMPK	GJA1	S364	NetworKIN	-0.0740805
		DMPK	CRYAB	S59	NetworKIN	0.926314		DMPK	CRYAB	S59	NetworKIN	1.30739		DMPK	CRYAB	S59	NetworKIN	-0.384713		DMPK	CRYAB	S59	NetworKIN	1.62837
		DMPK	HSPB1	S65	NetworKIN	-0.282196		DMPK	HSPB1	S65	NetworKIN	1.19051		DMPK	HSPB1	S65	NetworKIN	0.130473		DMPK	HSPB1	S65	NetworKIN	0.87668
		DMPK	CRYAB	S76	NetworKIN	-0.470683		DMPK	CRYAB	S76	NetworKIN	0.1875		DMPK	CRYAB	S76	NetworKIN	0.0829855		DMPK	CRYAB	S76	NetworKIN	0.0832054
		DMPK	HSPB1	S82	NetworKIN	0.883518		DMPK	HSPB1	S82	NetworKIN	1.25016		DMPK	HSPB1	S82	NetworKIN	-0.267891		DMPK	HSPB1	S82	NetworKIN	1.14434
		DMPK	HSPB1	S83	NetworKIN	1.07049		DMPK	HSPB1	S83	NetworKIN	1.08315		DMPK	HSPB1	S83	NetworKIN	-0.481017		DMPK	HSPB1	S83	NetworKIN	0.912212
		DMPK	HSPB1	S86	NetworKIN	0.596729		DMPK	HSPB1	S86	NetworKIN	0.813461		DMPK	HSPB1	S86	NetworKIN	-0.046395		DMPK	HSPB1	S86	NetworKIN	0.578559
		DMPK	HSPB1	S98	NetworKIN	-0.418407		DMPK	HSPB1	S98	NetworKIN	0.301862		DMPK	HSPB1	S98	NetworKIN	0.199557		DMPK	HSPB1	S98	NetworKIN	0.152832
		DMPK	RAF1	T260	NetworKIN	0.00781058		DMPK	RAF1	T260	NetworKIN	0.233051		DMPK	RAF1	T260	NetworKIN	0.0237345		DMPK	RAF1	T260	NetworKIN	0.105397
		EGFR	TJP1	Y132	NetworKIN	-0.103129		EGFR	TJP1	Y132	NetworKIN	0.24448		EGFR	TJP1	Y132	NetworKIN	0.319346		EGFR	TJP1	Y132	NetworKIN	0.0673816
		EGFR	CAV1	Y14	NetworKIN	-0.184943		EGFR	CAV1	Y14	NetworKIN	-0.0917786		EGFR	CAV1	Y14	NetworKIN	-0.0999114		EGFR	CAV1	Y14	NetworKIN	-0.231833
		EGFR	MAPK1	Y187	NetworKIN	0.571604		EGFR	MAPK1	Y187	NetworKIN	0.387487		EGFR	MAPK1	Y187	NetworKIN	0.0231633		EGFR	MAPK1	Y187	NetworKIN	-0.245997
		EGFR	WASL	Y256	NetworKIN	-0.122174		EGFR	WASL	Y256	NetworKIN	0.191811		EGFR	WASL	Y256	NetworKIN	0.234282		EGFR	WASL	Y256	NetworKIN	-0.102169
		EGFR	CTNND1	Y296	NetworKIN	-0.191919		EGFR	CTNND1	Y296	NetworKIN	0.0811938		EGFR	CTNND1	Y296	NetworKIN	0.21516		EGFR	CTNND1	Y296	NetworKIN	0.0324202
		EGFR	IRS1	Y612	NetworKIN	-0.364037		EGFR	IRS1	Y612	NetworKIN	0.109707		EGFR	IRS1	Y612	NetworKIN	0.143815		EGFR	IRS1	Y612	NetworKIN	-0.120175
		EGFR	STAT5B	Y699	NetworKIN	2.4341		EGFR	STAT5B	Y699	NetworKIN	0.320074		EGFR	STAT5B	Y699	NetworKIN	-0.40952		EGFR	STAT5B	Y699	NetworKIN	-0.192927
		EIF2AK2	EIF4EBP1	S101	NetworKIN	-0.266616		EIF2AK2	EIF4EBP1	S101	NetworKIN	-0.00638354		EIF2AK2	EIF4EBP1	S101	NetworKIN	0.127475		EIF2AK2	EIF4EBP1	S101	NetworKIN	0.0756034
		EIF2AK2	NPM1	S125	NetworKIN	-0.535003		EIF2AK2	NPM1	S125	NetworKIN	0.0958347		EIF2AK2	NPM1	S125	NetworKIN	0.287683		EIF2AK2	NPM1	S125	NetworKIN	-0.00869317
		EIF2AK2	MTOR	S1261	NetworKIN	0.846938		EIF2AK2	MTOR	S1261	NetworKIN	0.611645		EIF2AK2	MTOR	S1261	NetworKIN	0.184585		EIF2AK2	MTOR	S1261	NetworKIN	-0.263957
		EIF2AK2	MAVS	S152	NetworKIN	0.222677		EIF2AK2	MAVS	S152	NetworKIN	0.867421		EIF2AK2	MAVS	S152	NetworKIN	0.0614832		EIF2AK2	MAVS	S152	NetworKIN	0.880287
		EIF2AK2	MAVS	S165	NetworKIN	0.0369255		EIF2AK2	MAVS	S165	NetworKIN	0.376449		EIF2AK2	MAVS	S165	NetworKIN	-0.0258897		EIF2AK2	MAVS	S165	NetworKIN	0.135331
		EIF2AK2	PRKRA	S167	NetworKIN	-0.0455332		EIF2AK2	PRKRA	S167	NetworKIN	1.4823		EIF2AK2	PRKRA	S167	NetworKIN	0.0100196		EIF2AK2	PRKRA	S167	NetworKIN	0.115753
		EIF2AK2	PRKRA	S18	NetworKIN	-0.053805		EIF2AK2	PRKRA	S18	NetworKIN	0.884508		EIF2AK2	PRKRA	S18	NetworKIN	-0.0921893		EIF2AK2	PRKRA	S18	NetworKIN	0.139469
		EIF2AK2	EIF2S2	S2	NetworKIN	-0.149912		EIF2AK2	EIF2S2	S2	NetworKIN	0.0584529		EIF2AK2	EIF2S2	S2	NetworKIN	0.108725		EIF2AK2	EIF2S2	S2	NetworKIN	0.00290924
		EIF2AK2	MAVS	S222	NetworKIN	-0.160477		EIF2AK2	MAVS	S222	NetworKIN	0.558133		EIF2AK2	MAVS	S222	NetworKIN	-0.0458663		EIF2AK2	MAVS	S222	NetworKIN	1.12766
		EIF2AK2	MTOR	S2478	NetworKIN	-0.0634422		EIF2AK2	MTOR	S2478	NetworKIN	0.471664		EIF2AK2	MTOR	S2478	NetworKIN	0.711956		EIF2AK2	MTOR	S2478	NetworKIN	0.287632
		EIF2AK2	MTOR	S2481	NetworKIN	-0.168194		EIF2AK2	MTOR	S2481	NetworKIN	0.40866		EIF2AK2	MTOR	S2481	NetworKIN	0.62331		EIF2AK2	MTOR	S2481	NetworKIN	0.16587
		EIF2AK2	MAVS	S253	NetworKIN	-0.117502		EIF2AK2	MAVS	S253	NetworKIN	0.271539		EIF2AK2	MAVS	S253	NetworKIN	-0.236466		EIF2AK2	MAVS	S253	NetworKIN	-0.279517
		EIF2AK2	DNAJB6	S277	NetworKIN	-0.358652		EIF2AK2	DNAJB6	S277	NetworKIN	-0.130353		EIF2AK2	DNAJB6	S277	NetworKIN	-0.163074		EIF2AK2	DNAJB6	S277	NetworKIN	-0.337733
		EIF2AK2	PPP2R5A	S42	NetworKIN	-0.388945		EIF2AK2	PPP2R5A	S42	NetworKIN	-0.161755		EIF2AK2	PPP2R5A	S42	NetworKIN	-0.0970852		EIF2AK2	PPP2R5A	S42	NetworKIN	-0.103596
		EIF2AK2	PPP2R5A	S49	NetworKIN	0.0594778		EIF2AK2	PPP2R5A	S49	NetworKIN	0.7497		EIF2AK2	PPP2R5A	S49	NetworKIN	0.230973		EIF2AK2	PPP2R5A	S49	NetworKIN	0.00866888
		EIF2AK2	NPM1	S70	NetworKIN	0.115171		EIF2AK2	NPM1	S70	NetworKIN	0.176136		EIF2AK2	NPM1	S70	NetworKIN	0.671674		EIF2AK2	NPM1	S70	NetworKIN	0.359465
		EIF2AK2	NCK1	S85	NetworKIN	0.147193		EIF2AK2	NCK1	S85	NetworKIN	0.570691		EIF2AK2	NCK1	S85	NetworKIN	0.231727		EIF2AK2	NCK1	S85	NetworKIN	0.00109545
		EIF2AK2	NCK1	S89	NetworKIN	0.241652		EIF2AK2	NCK1	S89	NetworKIN	0.571778		EIF2AK2	NCK1	S89	NetworKIN	0.109347		EIF2AK2	NCK1	S89	NetworKIN	-0.00576668
		EIF2AK2	NCK1	S91	NetworKIN	-0.191871		EIF2AK2	NCK1	S91	NetworKIN	0.0540699		EIF2AK2	NCK1	S91	NetworKIN	0.21753		EIF2AK2	NCK1	S91	NetworKIN	0.492387
		EIF2AK2	EIF2S2	T111	NetworKIN	0.0127349		EIF2AK2	EIF2S2	T111	NetworKIN	-0.0895508		EIF2AK2	EIF2S2	T111	NetworKIN	0.241284		EIF2AK2	EIF2S2	T111	NetworKIN	0.0619264
		EIF2AK2	PRKRA	T20	NetworKIN	-0.159333		EIF2AK2	PRKRA	T20	NetworKIN	1.06624		EIF2AK2	PRKRA	T20	NetworKIN	-0.132778		EIF2AK2	PRKRA	T20	NetworKIN	0.302778
		EIF2AK2	EIF4EBP1	T36	NetworKIN	-1.22295		EIF2AK2	EIF4EBP1	T36	NetworKIN	-0.591305		EIF2AK2	EIF4EBP1	T36	NetworKIN	0.202765		EIF2AK2	EIF4EBP1	T36	NetworKIN	0.055227
		EIF2AK2	EIF4EBP1	T46	NetworKIN	-0.936129		EIF2AK2	EIF4EBP1	T46	NetworKIN	-0.391568		EIF2AK2	EIF4EBP1	T46	NetworKIN	0.105494		EIF2AK2	EIF4EBP1	T46	NetworKIN	0.125691
		EIF2AK2	EIF4EBP1	T70	NetworKIN	-0.588		EIF2AK2	EIF4EBP1	T70	NetworKIN	-0.17976		EIF2AK2	EIF4EBP1	T70	NetworKIN	0.14685		EIF2AK2	EIF4EBP1	T70	NetworKIN	-0.177883
		EPHA2	CTNND1	Y296	NetworKIN	-0.191919		EPHA2	CTNND1	Y296	NetworKIN	0.0811938		EPHA2	CTNND1	Y296	NetworKIN	0.21516		EPHA2	CTNND1	Y296	NetworKIN	0.0324202
		EPHB1	PXN	Y118	NetworKIN	-0.0266025		EPHB1	PXN	Y118	NetworKIN	0.140056		EPHB1	PXN	Y118	NetworKIN	0.194056		EPHB1	PXN	Y118	NetworKIN	-0.160185
		EPHB2	WASL	Y256	NetworKIN	-0.122174		EPHB2	WASL	Y256	NetworKIN	0.191811		EPHB2	WASL	Y256	NetworKIN	0.234282		EPHB2	WASL	Y256	NetworKIN	-0.102169
		ERBB2	PXN	Y118	NetworKIN	-0.0266025		ERBB2	PXN	Y118	NetworKIN	0.140056		ERBB2	PXN	Y118	NetworKIN	0.194056		ERBB2	PXN	Y118	NetworKIN	-0.160185
		ERBB2	CAV1	Y14	NetworKIN	-0.184943		ERBB2	CAV1	Y14	NetworKIN	-0.0917786		ERBB2	CAV1	Y14	NetworKIN	-0.0999114		ERBB2	CAV1	Y14	NetworKIN	-0.231833
		ERBB2	MAPK1	Y187	NetworKIN	0.571604		ERBB2	MAPK1	Y187	NetworKIN	0.387487		ERBB2	MAPK1	Y187	NetworKIN	0.0231633		ERBB2	MAPK1	Y187	NetworKIN	-0.245997
		ERBB2	CTNND1	Y296	NetworKIN	-0.191919		ERBB2	CTNND1	Y296	NetworKIN	0.0811938		ERBB2	CTNND1	Y296	NetworKIN	0.21516		ERBB2	CTNND1	Y296	NetworKIN	0.0324202
		ERBB2	TNS1	Y798	NetworKIN	-1.14615		ERBB2	TNS1	Y798	NetworKIN	-0.0179771		ERBB2	TNS1	Y798	NetworKIN	0.411425		ERBB2	TNS1	Y798	NetworKIN	0.712546
		ERBB4	STAT5B	Y699	NetworKIN	2.4341		ERBB4	STAT5B	Y699	NetworKIN	0.320074		ERBB4	STAT5B	Y699	NetworKIN	-0.40952		ERBB4	STAT5B	Y699	NetworKIN	-0.192927
		FGR	PXN	Y118	NetworKIN	-0.0266025		FGR	PXN	Y118	NetworKIN	0.140056		FGR	PXN	Y118	NetworKIN	0.194056		FGR	PXN	Y118	NetworKIN	-0.160185
		FGR	CAV1	Y14	NetworKIN	-0.184943		FGR	CAV1	Y14	NetworKIN	-0.0917786		FGR	CAV1	Y14	NetworKIN	-0.0999114		FGR	CAV1	Y14	NetworKIN	-0.231833
		FLT3	NPM1	Y67	NetworKIN	-0.178501		FLT3	NPM1	Y67	NetworKIN	0.071562		FLT3	NPM1	Y67	NetworKIN	0.376511		FLT3	NPM1	Y67	NetworKIN	-0.228698
		FYN	WASL	Y256	NetworKIN	-0.122174		FYN	WASL	Y256	NetworKIN	0.191811		FYN	WASL	Y256	NetworKIN	0.234282		FYN	WASL	Y256	NetworKIN	-0.102169
		FYN	CTNND1	Y296	NetworKIN	-0.191919		FYN	CTNND1	Y296	NetworKIN	0.0811938		FYN	CTNND1	Y296	NetworKIN	0.21516		FYN	CTNND1	Y296	NetworKIN	0.0324202
		GRK1	MAPK14	S2	NetworKIN	-0.121063		GRK1	MAPK14	S2	NetworKIN	-0.329715		GRK1	MAPK14	S2	NetworKIN	-0.225855		GRK1	MAPK14	S2	NetworKIN	-0.339047
		GRK1	ADRB2	S246	NetworKIN	0.0153979		GRK1	ADRB2	S246	NetworKIN	0.273078		GRK1	ADRB2	S246	NetworKIN	0.382648		GRK1	ADRB2	S246	NetworKIN	0.148041
		GRK1	CCR1	S352	NetworKIN	-0.361419		GRK1	CCR1	S352	NetworKIN	0.219652		GRK1	CCR1	S352	NetworKIN	0.27856		GRK1	CCR1	S352	NetworKIN	0.182122
		GRK1	CAV1	S37	NetworKIN	-0.463054		GRK1	CAV1	S37	NetworKIN	0.146723		GRK1	CAV1	S37	NetworKIN	0.153348		GRK1	CAV1	S37	NetworKIN	-0.0553476
		GRK1	PRKAR2A	S78	NetworKIN	-0.334124		GRK1	PRKAR2A	S78	NetworKIN	0.163518		GRK1	PRKAR2A	S78	NetworKIN	0.130566		GRK1	PRKAR2A	S78	NetworKIN	0.0710053
		GRK1	PRKAR2A	S80	NetworKIN	-0.182898		GRK1	PRKAR2A	S80	NetworKIN	0.127132		GRK1	PRKAR2A	S80	NetworKIN	0.0832369		GRK1	PRKAR2A	S80	NetworKIN	0.0238706
		GRK1	PRKAR2A	S99	NetworKIN	-0.0930411		GRK1	PRKAR2A	S99	NetworKIN	-0.0209813		GRK1	PRKAR2A	S99	NetworKIN	-0.0103187		GRK1	PRKAR2A	S99	NetworKIN	-0.0161239
		GRK1	PRKAR2A	T104	NetworKIN	-0.076431		GRK1	PRKAR2A	T104	NetworKIN	-0.196348		GRK1	PRKAR2A	T104	NetworKIN	0.0190854		GRK1	PRKAR2A	T104	NetworKIN	-0.0991012
		GRK4	ADRB2	S246	NetworKIN	0.0153979		GRK4	ADRB2	S246	NetworKIN	0.273078		GRK4	ADRB2	S246	NetworKIN	0.382648		GRK4	ADRB2	S246	NetworKIN	0.148041
		GRK4	CCR1	S352	NetworKIN	-0.361419		GRK4	CCR1	S352	NetworKIN	0.219652		GRK4	CCR1	S352	NetworKIN	0.27856		GRK4	CCR1	S352	NetworKIN	0.182122
		GRK5	ADRB2	S246	NetworKIN	0.0153979		GRK5	ADRB2	S246	NetworKIN	0.273078		GRK5	ADRB2	S246	NetworKIN	0.382648		GRK5	ADRB2	S246	NetworKIN	0.148041
		GRK5	CCR1	S352	NetworKIN	-0.361419		GRK5	CCR1	S352	NetworKIN	0.219652		GRK5	CCR1	S352	NetworKIN	0.27856		GRK5	CCR1	S352	NetworKIN	0.182122
		GRK5	CAV1	S37	NetworKIN	-0.463054		GRK5	CAV1	S37	NetworKIN	0.146723		GRK5	CAV1	S37	NetworKIN	0.153348		GRK5	CAV1	S37	NetworKIN	-0.0553476
		GRK5	PRKAR2A	S78	NetworKIN	-0.334124		GRK5	PRKAR2A	S78	NetworKIN	0.163518		GRK5	PRKAR2A	S78	NetworKIN	0.130566		GRK5	PRKAR2A	S78	NetworKIN	0.0710053
		GRK5	PRKAR2A	S80	NetworKIN	-0.182898		GRK5	PRKAR2A	S80	NetworKIN	0.127132		GRK5	PRKAR2A	S80	NetworKIN	0.0832369		GRK5	PRKAR2A	S80	NetworKIN	0.0238706
		GRK5	PRKAR2A	S99	NetworKIN	-0.0930411		GRK5	PRKAR2A	S99	NetworKIN	-0.0209813		GRK5	PRKAR2A	S99	NetworKIN	-0.0103187		GRK5	PRKAR2A	S99	NetworKIN	-0.0161239
		GRK5	PRKAR2A	T104	NetworKIN	-0.076431		GRK5	PRKAR2A	T104	NetworKIN	-0.196348		GRK5	PRKAR2A	T104	NetworKIN	0.0190854		GRK5	PRKAR2A	T104	NetworKIN	-0.0991012
		GRK6	ADRB2	S246	NetworKIN	0.0153979		GRK6	ADRB2	S246	NetworKIN	0.273078		GRK6	ADRB2	S246	NetworKIN	0.382648		GRK6	ADRB2	S246	NetworKIN	0.148041
		GRK6	CCR1	S352	NetworKIN	-0.361419		GRK6	CCR1	S352	NetworKIN	0.219652		GRK6	CCR1	S352	NetworKIN	0.27856		GRK6	CCR1	S352	NetworKIN	0.182122
		GRK7	ADRB2	S246	NetworKIN	0.0153979		GRK7	ADRB2	S246	NetworKIN	0.273078		GRK7	ADRB2	S246	NetworKIN	0.382648		GRK7	ADRB2	S246	NetworKIN	0.148041
		GRK7	CCR1	S352	NetworKIN	-0.361419		GRK7	CCR1	S352	NetworKIN	0.219652		GRK7	CCR1	S352	NetworKIN	0.27856		GRK7	CCR1	S352	NetworKIN	0.182122
		GRK7	PRKAR2A	S78	NetworKIN	-0.334124		GRK7	PRKAR2A	S78	NetworKIN	0.163518		GRK7	PRKAR2A	S78	NetworKIN	0.130566		GRK7	PRKAR2A	S78	NetworKIN	0.0710053
		GRK7	PRKAR2A	S80	NetworKIN	-0.182898		GRK7	PRKAR2A	S80	NetworKIN	0.127132		GRK7	PRKAR2A	S80	NetworKIN	0.0832369		GRK7	PRKAR2A	S80	NetworKIN	0.0238706
		GRK7	PRKAR2A	S99	NetworKIN	-0.0930411		GRK7	PRKAR2A	S99	NetworKIN	-0.0209813		GRK7	PRKAR2A	S99	NetworKIN	-0.0103187		GRK7	PRKAR2A	S99	NetworKIN	-0.0161239
		GRK7	PRKAR2A	T104	NetworKIN	-0.076431		GRK7	PRKAR2A	T104	NetworKIN	-0.196348		GRK7	PRKAR2A	T104	NetworKIN	0.0190854		GRK7	PRKAR2A	T104	NetworKIN	-0.0991012
		GSK3A	CDKN1B	S10	NetworKIN	-0.528298		GSK3A	CDKN1B	S10	NetworKIN	-0.157325		GSK3A	CDKN1B	S10	NetworKIN	-0.0046816		GSK3A	CDKN1B	S10	NetworKIN	-0.180952
		GSK3A	PXN	S106	NetworKIN	0.482801		GSK3A	PXN	S106	NetworKIN	0.549764		GSK3A	PXN	S106	NetworKIN	0.162662		GSK3A	PXN	S106	NetworKIN	0.628238
		GSK3A	IRS1	S1078	NetworKIN	-0.388847		GSK3A	IRS1	S1078	NetworKIN	-0.342383		GSK3A	IRS1	S1078	NetworKIN	0.0418062		GSK3A	IRS1	S1078	NetworKIN	-0.156188
		GSK3A	IRS1	S1101	NetworKIN	-0.436822		GSK3A	IRS1	S1101	NetworKIN	-0.460267		GSK3A	IRS1	S1101	NetworKIN	0.223994		GSK3A	IRS1	S1101	NetworKIN	0.132442
		GSK3A	MAP1B	S1256	NetworKIN	-0.25409		GSK3A	MAP1B	S1256	NetworKIN	0.106134		GSK3A	MAP1B	S1256	NetworKIN	0.154528		GSK3A	MAP1B	S1256	NetworKIN	0.00145506
		GSK3A	PXN	S126	NetworKIN	0.250943		GSK3A	PXN	S126	NetworKIN	0.352722		GSK3A	PXN	S126	NetworKIN	0.321774		GSK3A	PXN	S126	NetworKIN	0.637746
		GSK3A	MAP1B	S1260	NetworKIN	0.140396		GSK3A	MAP1B	S1260	NetworKIN	0.0562297		GSK3A	MAP1B	S1260	NetworKIN	0.124721		GSK3A	MAP1B	S1260	NetworKIN	-0.132018
		GSK3A	MTOR	S1261	NetworKIN	0.846938		GSK3A	MTOR	S1261	NetworKIN	0.611645		GSK3A	MTOR	S1261	NetworKIN	0.184585		GSK3A	MTOR	S1261	NetworKIN	-0.263957
		GSK3A	MAP1B	S1262	NetworKIN	0.454568		GSK3A	MAP1B	S1262	NetworKIN	0.15554		GSK3A	MAP1B	S1262	NetworKIN	0.342966		GSK3A	MAP1B	S1262	NetworKIN	0.196901
		GSK3A	MAP1B	S1265	NetworKIN	-0.231074		GSK3A	MAP1B	S1265	NetworKIN	0.365886		GSK3A	MAP1B	S1265	NetworKIN	0.245004		GSK3A	MAP1B	S1265	NetworKIN	0.172535
		GSK3A	PXN	S130	NetworKIN	0.134353		GSK3A	PXN	S130	NetworKIN	0.244504		GSK3A	PXN	S130	NetworKIN	0.271262		GSK3A	PXN	S130	NetworKIN	0.474685
		GSK3A	TSC2	S1388	NetworKIN	-0.665574		GSK3A	TSC2	S1388	NetworKIN	0.312593		GSK3A	TSC2	S1388	NetworKIN	0.345871		GSK3A	TSC2	S1388	NetworKIN	-0.03507
		GSK3A	MAP1B	S1389	NetworKIN	-1.2018		GSK3A	MAP1B	S1389	NetworKIN	0.390225		GSK3A	MAP1B	S1389	NetworKIN	-0.0347509		GSK3A	MAP1B	S1389	NetworKIN	0.508869
		GSK3A	MAP1B	S1396	NetworKIN	-0.126766		GSK3A	MAP1B	S1396	NetworKIN	0.697487		GSK3A	MAP1B	S1396	NetworKIN	0.375667		GSK3A	MAP1B	S1396	NetworKIN	0.498846
		GSK3A	MAP1B	S1400	NetworKIN	0.640696		GSK3A	MAP1B	S1400	NetworKIN	0.425232		GSK3A	MAP1B	S1400	NetworKIN	0.697381		GSK3A	MAP1B	S1400	NetworKIN	0.547198
		GSK3A	TSC2	S1411	NetworKIN	0.187904		GSK3A	TSC2	S1411	NetworKIN	-0.0176994		GSK3A	TSC2	S1411	NetworKIN	-0.148274		GSK3A	TSC2	S1411	NetworKIN	0.0432427
		GSK3A	MAP1B	S1427	NetworKIN	-0.489078		GSK3A	MAP1B	S1427	NetworKIN	0.42245		GSK3A	MAP1B	S1427	NetworKIN	0.383606		GSK3A	MAP1B	S1427	NetworKIN	0.149392
		GSK3A	CLIP1	S143	NetworKIN	-0.331444		GSK3A	CLIP1	S143	NetworKIN	0.180319		GSK3A	CLIP1	S143	NetworKIN	0.0773774		GSK3A	CLIP1	S143	NetworKIN	-0.0659771
		GSK3A	CLIP1	S147	NetworKIN	-0.0369325		GSK3A	CLIP1	S147	NetworKIN	-0.292005		GSK3A	CLIP1	S147	NetworKIN	0.521495		GSK3A	CLIP1	S147	NetworKIN	0.0356213
		GSK3A	MAP1B	S1501	NetworKIN	-0.254099		GSK3A	MAP1B	S1501	NetworKIN	0.553985		GSK3A	MAP1B	S1501	NetworKIN	0.452864		GSK3A	MAP1B	S1501	NetworKIN	0.164316
		GSK3A	MAP1B	S1779	NetworKIN	-0.948941		GSK3A	MAP1B	S1779	NetworKIN	0.580999		GSK3A	MAP1B	S1779	NetworKIN	0.841979		GSK3A	MAP1B	S1779	NetworKIN	0.0737492
		GSK3A	CDKN1B	S178	NetworKIN	-0.765252		GSK3A	CDKN1B	S178	NetworKIN	-0.0200448		GSK3A	CDKN1B	S178	NetworKIN	0.141546		GSK3A	CDKN1B	S178	NetworKIN	-0.289854
		GSK3A	MAP1B	S1793	NetworKIN	0.769992		GSK3A	MAP1B	S1793	NetworKIN	0.230411		GSK3A	MAP1B	S1793	NetworKIN	0.530199		GSK3A	MAP1B	S1793	NetworKIN	0.68928
		GSK3A	MAP1B	S1797	NetworKIN	0.756087		GSK3A	MAP1B	S1797	NetworKIN	0.254594		GSK3A	MAP1B	S1797	NetworKIN	0.507344		GSK3A	MAP1B	S1797	NetworKIN	0.693856
		GSK3A	MAP1B	S1819	NetworKIN	-0.891206		GSK3A	MAP1B	S1819	NetworKIN	0.226501		GSK3A	MAP1B	S1819	NetworKIN	0.0934097		GSK3A	MAP1B	S1819	NetworKIN	0.0175228
		GSK3A	MAP1B	S1915	NetworKIN	-0.241206		GSK3A	MAP1B	S1915	NetworKIN	0.052014		GSK3A	MAP1B	S1915	NetworKIN	0.0933937		GSK3A	MAP1B	S1915	NetworKIN	0.141555
		GSK3A	DVL3	S192	NetworKIN	-0.0458752		GSK3A	DVL3	S192	NetworKIN	0.057827		GSK3A	DVL3	S192	NetworKIN	0.402842		GSK3A	DVL3	S192	NetworKIN	-0.262417
		GSK3A	CLIP1	S200	NetworKIN	-0.583199		GSK3A	CLIP1	S200	NetworKIN	0.235591		GSK3A	CLIP1	S200	NetworKIN	0.506674		GSK3A	CLIP1	S200	NetworKIN	0.0716068
		GSK3A	CLIP1	S204	NetworKIN	-1.03375		GSK3A	CLIP1	S204	NetworKIN	-0.318561		GSK3A	CLIP1	S204	NetworKIN	0.183386		GSK3A	CLIP1	S204	NetworKIN	-0.122329
		GSK3A	GSK3A	S21	NetworKIN	-0.549143		GSK3A	GSK3A	S21	NetworKIN	-0.0638136		GSK3A	GSK3A	S21	NetworKIN	0.423193		GSK3A	GSK3A	S21	NetworKIN	0.0381005
		GSK3A	LMNA	S22	NetworKIN	-0.161458		GSK3A	LMNA	S22	NetworKIN	0.0664647		GSK3A	LMNA	S22	NetworKIN	0.0436675		GSK3A	LMNA	S22	NetworKIN	0.0718758
		GSK3A	MTOR	S2481	NetworKIN	-0.168194		GSK3A	MTOR	S2481	NetworKIN	0.40866		GSK3A	MTOR	S2481	NetworKIN	0.62331		GSK3A	MTOR	S2481	NetworKIN	0.16587
		GSK3A	FOXO3	S253	NetworKIN	-0.0652574		GSK3A	FOXO3	S253	NetworKIN	-0.250179		GSK3A	FOXO3	S253	NetworKIN	0.573233		GSK3A	FOXO3	S253	NetworKIN	0.244162
		GSK3A	IRS1	S270	NetworKIN	-0.202046		GSK3A	IRS1	S270	NetworKIN	-0.191829		GSK3A	IRS1	S270	NetworKIN	-0.130835		GSK3A	IRS1	S270	NetworKIN	0.060301
		GSK3A	FOXO1	S287	NetworKIN	-0.491937		GSK3A	FOXO1	S287	NetworKIN	0.173654		GSK3A	FOXO1	S287	NetworKIN	0.225351		GSK3A	FOXO1	S287	NetworKIN	-0.0751309
		GSK3A	IRS1	S3	NetworKIN	-0.20939		GSK3A	IRS1	S3	NetworKIN	-0.130666		GSK3A	IRS1	S3	NetworKIN	-0.0778996		GSK3A	IRS1	S3	NetworKIN	0.0320856
		GSK3A	HSF1	S303	NetworKIN	-0.107151		GSK3A	HSF1	S303	NetworKIN	0.137637		GSK3A	HSF1	S303	NetworKIN	0.269102		GSK3A	HSF1	S303	NetworKIN	-0.447623
		GSK3A	HSF1	S307	NetworKIN	-0.123465		GSK3A	HSF1	S307	NetworKIN	0.130728		GSK3A	HSF1	S307	NetworKIN	0.25749		GSK3A	HSF1	S307	NetworKIN	-0.424613
		GSK3A	IRS1	S312	NetworKIN	-0.517916		GSK3A	IRS1	S312	NetworKIN	0.0484965		GSK3A	IRS1	S312	NetworKIN	0.353662		GSK3A	IRS1	S312	NetworKIN	0.348236
		GSK3A	WFS1	S32	NetworKIN	-0.000206		GSK3A	WFS1	S32	NetworKIN	0.89029		GSK3A	WFS1	S32	NetworKIN	0.243739		GSK3A	WFS1	S32	NetworKIN	0.0684354
		GSK3A	IRS1	S337	NetworKIN	-0.0672215		GSK3A	IRS1	S337	NetworKIN	-0.317853		GSK3A	IRS1	S337	NetworKIN	-0.125926		GSK3A	IRS1	S337	NetworKIN	-0.127212
		GSK3A	IRS1	S341	NetworKIN	-0.0864353		GSK3A	IRS1	S341	NetworKIN	-0.287902		GSK3A	IRS1	S341	NetworKIN	0.111322		GSK3A	IRS1	S341	NetworKIN	-0.0952166
		GSK3A	TBC1D4	S344	NetworKIN	-0.763077		GSK3A	TBC1D4	S344	NetworKIN	-0.225551		GSK3A	TBC1D4	S344	NetworKIN	0.586182		GSK3A	TBC1D4	S344	NetworKIN	0.17067
		GSK3A	IRS1	S348	NetworKIN	-0.186318		GSK3A	IRS1	S348	NetworKIN	-0.0961616		GSK3A	IRS1	S348	NetworKIN	0.101395		GSK3A	IRS1	S348	NetworKIN	-0.0400865
		GSK3A	HSF1	S363	NetworKIN	8.89996e-06		GSK3A	HSF1	S363	NetworKIN	0.143189		GSK3A	HSF1	S363	NetworKIN	0.517889		GSK3A	HSF1	S363	NetworKIN	0.235229
		GSK3A	PSEN1	S367	NetworKIN	-0.351355		GSK3A	PSEN1	S367	NetworKIN	-0.177175		GSK3A	PSEN1	S367	NetworKIN	-0.202733		GSK3A	PSEN1	S367	NetworKIN	-0.492106
		GSK3A	PTEN	S370	NetworKIN	-0.0744926		GSK3A	PTEN	S370	NetworKIN	-0.233679		GSK3A	PTEN	S370	NetworKIN	0.633936		GSK3A	PTEN	S370	NetworKIN	0.369794
		GSK3A	GSK3A	S39	NetworKIN	-0.249046		GSK3A	GSK3A	S39	NetworKIN	-0.20917		GSK3A	GSK3A	S39	NetworKIN	0.305838		GSK3A	GSK3A	S39	NetworKIN	-0.211578
		GSK3A	LMNA	S390	NetworKIN	-0.124019		GSK3A	LMNA	S390	NetworKIN	0.142752		GSK3A	LMNA	S390	NetworKIN	0.00870554		GSK3A	LMNA	S390	NetworKIN	0.0556136
		GSK3A	LMNA	S392	NetworKIN	-0.132101		GSK3A	LMNA	S392	NetworKIN	0.181557		GSK3A	LMNA	S392	NetworKIN	-0.00831588		GSK3A	LMNA	S392	NetworKIN	0.0831362
		GSK3A	LMNA	S403	NetworKIN	0.0837687		GSK3A	LMNA	S403	NetworKIN	0.886862		GSK3A	LMNA	S403	NetworKIN	0.0651848		GSK3A	LMNA	S403	NetworKIN	0.0862561
		GSK3A	LMNA	S407	NetworKIN	-0.221268		GSK3A	LMNA	S407	NetworKIN	0.647283		GSK3A	LMNA	S407	NetworKIN	-0.0541878		GSK3A	LMNA	S407	NetworKIN	0.351411
		GSK3A	FOXO3	S425	NetworKIN	0.0562367		GSK3A	FOXO3	S425	NetworKIN	0.370337		GSK3A	FOXO3	S425	NetworKIN	-0.0204672		GSK3A	FOXO3	S425	NetworKIN	0.683467
		GSK3A	LMNA	S426	NetworKIN	0.179301		GSK3A	LMNA	S426	NetworKIN	1.27365		GSK3A	LMNA	S426	NetworKIN	0.233879		GSK3A	LMNA	S426	NetworKIN	0.443152
		GSK3A	LMNA	S428	NetworKIN	-0.085808		GSK3A	LMNA	S428	NetworKIN	0.33868		GSK3A	LMNA	S428	NetworKIN	0.0259009		GSK3A	LMNA	S428	NetworKIN	0.123374
		GSK3A	LMNA	S429	NetworKIN	-0.18074		GSK3A	LMNA	S429	NetworKIN	0.192988		GSK3A	LMNA	S429	NetworKIN	0.434617		GSK3A	LMNA	S429	NetworKIN	0.265774
		GSK3A	FOXO1	S470	NetworKIN	-0.422833		GSK3A	FOXO1	S470	NetworKIN	0.488398		GSK3A	FOXO1	S470	NetworKIN	0.242123		GSK3A	FOXO1	S470	NetworKIN	0.030756
		GSK3A	AKT2	S474	NetworKIN	-0.218463		GSK3A	AKT2	S474	NetworKIN	-0.0712267		GSK3A	AKT2	S474	NetworKIN	0.148073		GSK3A	AKT2	S474	NetworKIN	0.0791953
		GSK3A	CLIP1	S48	NetworKIN	-0.489015		GSK3A	CLIP1	S48	NetworKIN	0.193961		GSK3A	CLIP1	S48	NetworKIN	0.123898		GSK3A	CLIP1	S48	NetworKIN	-0.139983
		GSK3A	SLC2A4	S488	NetworKIN	-0.216969		GSK3A	SLC2A4	S488	NetworKIN	0.252813		GSK3A	SLC2A4	S488	NetworKIN	0.114474		GSK3A	SLC2A4	S488	NetworKIN	0.033741
		GSK3A	IRS1	S527	NetworKIN	-0.352686		GSK3A	IRS1	S527	NetworKIN	-0.281124		GSK3A	IRS1	S527	NetworKIN	0.150522		GSK3A	IRS1	S527	NetworKIN	0.123649
		GSK3A	IRS1	S531	NetworKIN	-0.506915		GSK3A	IRS1	S531	NetworKIN	-0.328371		GSK3A	IRS1	S531	NetworKIN	0.200626		GSK3A	IRS1	S531	NetworKIN	-0.0269413
		GSK3A	SEC31A	S532	NetworKIN	-0.398931		GSK3A	SEC31A	S532	NetworKIN	0.608005		GSK3A	SEC31A	S532	NetworKIN	0.429472		GSK3A	SEC31A	S532	NetworKIN	0.41263
		GSK3A	EIF2B5	S544	NetworKIN	-0.162955		GSK3A	EIF2B5	S544	NetworKIN	-0.0455541		GSK3A	EIF2B5	S544	NetworKIN	-0.035111		GSK3A	EIF2B5	S544	NetworKIN	-0.136816
		GSK3A	CTNNB1	S552	NetworKIN	0.0103464		GSK3A	CTNNB1	S552	NetworKIN	0.228096		GSK3A	CTNNB1	S552	NetworKIN	0.158061		GSK3A	CTNNB1	S552	NetworKIN	0.0525474
		GSK3A	CLASP1	S559	NetworKIN	-0.748901		GSK3A	CLASP1	S559	NetworKIN	-0.0712713		GSK3A	CLASP1	S559	NetworKIN	0.139206		GSK3A	CLASP1	S559	NetworKIN	-0.0432786
		GSK3A	TBC1D4	S566	NetworKIN	-0.437561		GSK3A	TBC1D4	S566	NetworKIN	0.0901976		GSK3A	TBC1D4	S566	NetworKIN	-0.162263		GSK3A	TBC1D4	S566	NetworKIN	-0.0684936
		GSK3A	TBC1D4	S569	NetworKIN	-0.396769		GSK3A	TBC1D4	S569	NetworKIN	0.0749317		GSK3A	TBC1D4	S569	NetworKIN	0.150896		GSK3A	TBC1D4	S569	NetworKIN	0.213142
		GSK3A	TBC1D4	S570	NetworKIN	-0.262862		GSK3A	TBC1D4	S570	NetworKIN	-0.126642		GSK3A	TBC1D4	S570	NetworKIN	0.154913		GSK3A	TBC1D4	S570	NetworKIN	0.259523
		GSK3A	TBC1D4	S591	NetworKIN	-0.253556		GSK3A	TBC1D4	S591	NetworKIN	-0.109364		GSK3A	TBC1D4	S591	NetworKIN	0.115423		GSK3A	TBC1D4	S591	NetworKIN	-0.160858
		GSK3A	DDX3X	S594	NetworKIN	-0.333649		GSK3A	DDX3X	S594	NetworKIN	0.365012		GSK3A	DDX3X	S594	NetworKIN	0.0187176		GSK3A	DDX3X	S594	NetworKIN	-0.0721046
		GSK3A	CLASP1	S598	NetworKIN	-0.0870856		GSK3A	CLASP1	S598	NetworKIN	0.106178		GSK3A	CLASP1	S598	NetworKIN	0.338795		GSK3A	CLASP1	S598	NetworKIN	0.0286844
		GSK3A	DDX3X	S612	NetworKIN	-0.289632		GSK3A	DDX3X	S612	NetworKIN	0.322193		GSK3A	DDX3X	S612	NetworKIN	-0.186976		GSK3A	DDX3X	S612	NetworKIN	-0.024532
		GSK3A	LMNA	S615	NetworKIN	0.566218		GSK3A	LMNA	S615	NetworKIN	0.34879		GSK3A	LMNA	S615	NetworKIN	0.0755194		GSK3A	LMNA	S615	NetworKIN	0.124563
		GSK3A	LMNA	S616	NetworKIN	-0.00819978		GSK3A	LMNA	S616	NetworKIN	0.410313		GSK3A	LMNA	S616	NetworKIN	0.323264		GSK3A	LMNA	S616	NetworKIN	0.391173
		GSK3A	LMNA	S619	NetworKIN	-0.0858659		GSK3A	LMNA	S619	NetworKIN	0.0906753		GSK3A	LMNA	S619	NetworKIN	0.116084		GSK3A	LMNA	S619	NetworKIN	0.00102112
		GSK3A	LMNA	S652	NetworKIN	-0.306669		GSK3A	LMNA	S652	NetworKIN	0.914831		GSK3A	LMNA	S652	NetworKIN	-0.128259		GSK3A	LMNA	S652	NetworKIN	0.479564
		GSK3A	JUN	S73	NetworKIN	0.571589		GSK3A	JUN	S73	NetworKIN	0.577378		GSK3A	JUN	S73	NetworKIN	0.174698		GSK3A	JUN	S73	NetworKIN	0.828948
		GSK3A	BAD	S75	NetworKIN	-0.425042		GSK3A	BAD	S75	NetworKIN	0.0516968		GSK3A	BAD	S75	NetworKIN	0.16052		GSK3A	BAD	S75	NetworKIN	0.130798
		GSK3A	SEC31A	S799	NetworKIN	-0.66965		GSK3A	SEC31A	S799	NetworKIN	0.105926		GSK3A	SEC31A	S799	NetworKIN	0.107215		GSK3A	SEC31A	S799	NetworKIN	-0.0581276
		GSK3A	DDX3X	S82	NetworKIN	-0.150722		GSK3A	DDX3X	S82	NetworKIN	0.205439		GSK3A	DDX3X	S82	NetworKIN	-0.0725366		GSK3A	DDX3X	S82	NetworKIN	0.021317
		GSK3A	MAP1B	S828	NetworKIN	-0.251774		GSK3A	MAP1B	S828	NetworKIN	0.413028		GSK3A	MAP1B	S828	NetworKIN	0.53591		GSK3A	MAP1B	S828	NetworKIN	0.0704422
		GSK3A	PXN	S83	NetworKIN	-0.276617		GSK3A	PXN	S83	NetworKIN	0.425102		GSK3A	PXN	S83	NetworKIN	0.176491		GSK3A	PXN	S83	NetworKIN	0.0728466
		GSK3A	PXN	S84	NetworKIN	-0.289844		GSK3A	PXN	S84	NetworKIN	0.335265		GSK3A	PXN	S84	NetworKIN	-0.155781		GSK3A	PXN	S84	NetworKIN	0.0987701
		GSK3A	PXN	S85	NetworKIN	-0.250337		GSK3A	PXN	S85	NetworKIN	0.354932		GSK3A	PXN	S85	NetworKIN	0.234233		GSK3A	PXN	S85	NetworKIN	0.164829
		GSK3A	RBL2	S952	NetworKIN	0.0813378		GSK3A	RBL2	S952	NetworKIN	0.25072		GSK3A	RBL2	S952	NetworKIN	0.0865094		GSK3A	RBL2	S952	NetworKIN	0.166277
		GSK3A	RBL2	S981	NetworKIN	-0.18188		GSK3A	RBL2	S981	NetworKIN	0.0690017		GSK3A	RBL2	S981	NetworKIN	0.451126		GSK3A	RBL2	S981	NetworKIN	0.134659
		GSK3A	RBL2	S982	NetworKIN	-0.13832		GSK3A	RBL2	S982	NetworKIN	0.108639		GSK3A	RBL2	S982	NetworKIN	0.512845		GSK3A	RBL2	S982	NetworKIN	0.159421
		GSK3A	MAP1B	S995	NetworKIN	-1.08638		GSK3A	MAP1B	S995	NetworKIN	0.696309		GSK3A	MAP1B	S995	NetworKIN	0.432385		GSK3A	MAP1B	S995	NetworKIN	0.381543
		GSK3A	PXN	T132	NetworKIN	0.274383		GSK3A	PXN	T132	NetworKIN	0.0720247		GSK3A	PXN	T132	NetworKIN	0.165727		GSK3A	PXN	T132	NetworKIN	0.36934
		GSK3A	CLIP1	T140	NetworKIN	-0.132782		GSK3A	CLIP1	T140	NetworKIN	0.141952		GSK3A	CLIP1	T140	NetworKIN	0.441652		GSK3A	CLIP1	T140	NetworKIN	-0.19982
		GSK3A	TSC2	T1462	NetworKIN	0.0392118		GSK3A	TSC2	T1462	NetworKIN	0.223093		GSK3A	TSC2	T1462	NetworKIN	0.100408		GSK3A	TSC2	T1462	NetworKIN	-0.0246047
		GSK3A	MAP1B	T1503	NetworKIN	-0.269203		GSK3A	MAP1B	T1503	NetworKIN	0.334314		GSK3A	MAP1B	T1503	NetworKIN	-0.0316029		GSK3A	MAP1B	T1503	NetworKIN	0.0393644
		GSK3A	CLIP1	T182	NetworKIN	-0.664763		GSK3A	CLIP1	T182	NetworKIN	0.141083		GSK3A	CLIP1	T182	NetworKIN	0.326972		GSK3A	CLIP1	T182	NetworKIN	-0.048835
		GSK3A	LMNA	T19	NetworKIN	-0.289013		GSK3A	LMNA	T19	NetworKIN	-0.0127615		GSK3A	LMNA	T19	NetworKIN	-0.0502744		GSK3A	LMNA	T19	NetworKIN	0.108429
		GSK3A	CLIP1	T191	NetworKIN	-0.760161		GSK3A	CLIP1	T191	NetworKIN	-0.109779		GSK3A	CLIP1	T191	NetworKIN	0.301468		GSK3A	CLIP1	T191	NetworKIN	-0.453582
		GSK3A	CLIP1	T350	NetworKIN	0.287849		GSK3A	CLIP1	T350	NetworKIN	0.732263		GSK3A	CLIP1	T350	NetworKIN	0.049306		GSK3A	CLIP1	T350	NetworKIN	-0.358921
		GSK3A	EIF4EBP1	T36	NetworKIN	-1.22295		GSK3A	EIF4EBP1	T36	NetworKIN	-0.591305		GSK3A	EIF4EBP1	T36	NetworKIN	0.202765		GSK3A	EIF4EBP1	T36	NetworKIN	0.055227
		GSK3A	LMNA	T394	NetworKIN	-0.0510607		GSK3A	LMNA	T394	NetworKIN	0.203896		GSK3A	LMNA	T394	NetworKIN	0.0233978		GSK3A	LMNA	T394	NetworKIN	0.0959941
		GSK3A	HIST1H1B	T4	NetworKIN	-0.223691		GSK3A	HIST1H1B	T4	NetworKIN	0.0259649		GSK3A	HIST1H1B	T4	NetworKIN	0.134536		GSK3A	HIST1H1B	T4	NetworKIN	0.136759
		GSK3A	LMNA	T409	NetworKIN	-0.15288		GSK3A	LMNA	T409	NetworKIN	0.331106		GSK3A	LMNA	T409	NetworKIN	0.223486		GSK3A	LMNA	T409	NetworKIN	0.19879
		GSK3A	LMNA	T424	NetworKIN	0.553987		GSK3A	LMNA	T424	NetworKIN	2.04085		GSK3A	LMNA	T424	NetworKIN	0.511611		GSK3A	LMNA	T424	NetworKIN	0.766013
		GSK3A	AKT2	T451	NetworKIN	0.0929033		GSK3A	AKT2	T451	NetworKIN	0.398473		GSK3A	AKT2	T451	NetworKIN	0.39947		GSK3A	AKT2	T451	NetworKIN	0.04948
		GSK3A	EIF4EBP1	T46	NetworKIN	-0.936129		GSK3A	EIF4EBP1	T46	NetworKIN	-0.391568		GSK3A	EIF4EBP1	T46	NetworKIN	0.105494		GSK3A	EIF4EBP1	T46	NetworKIN	0.125691
		GSK3A	SLC2A1	T478	NetworKIN	-1.39109		GSK3A	SLC2A1	T478	NetworKIN	0.375512		GSK3A	SLC2A1	T478	NetworKIN	-0.691461		GSK3A	SLC2A1	T478	NetworKIN	0.409524
		GSK3A	SLC2A4	T486	NetworKIN	-0.132782		GSK3A	SLC2A4	T486	NetworKIN	0.223433		GSK3A	SLC2A4	T486	NetworKIN	0.0409701		GSK3A	SLC2A4	T486	NetworKIN	-0.0379009
		GSK3A	IRS1	T530	NetworKIN	-0.60952		GSK3A	IRS1	T530	NetworKIN	-0.248466		GSK3A	IRS1	T530	NetworKIN	0.346346		GSK3A	IRS1	T530	NetworKIN	0.0823952
		GSK3A	CTNNB1	T551	NetworKIN	0.0248789		GSK3A	CTNNB1	T551	NetworKIN	0.415619		GSK3A	CTNNB1	T551	NetworKIN	0.105122		GSK3A	CTNNB1	T551	NetworKIN	-0.0124792
		GSK3A	EIF4EBP1	T70	NetworKIN	-0.588		GSK3A	EIF4EBP1	T70	NetworKIN	-0.17976		GSK3A	EIF4EBP1	T70	NetworKIN	0.14685		GSK3A	EIF4EBP1	T70	NetworKIN	-0.177883
		GSK3A	PPP1R2	T73	NetworKIN	0.159015		GSK3A	PPP1R2	T73	NetworKIN	0.303293		GSK3A	PPP1R2	T73	NetworKIN	0.185649		GSK3A	PPP1R2	T73	NetworKIN	-0.092749
		GSK3A	RBL2	T986	NetworKIN	-0.165582		GSK3A	RBL2	T986	NetworKIN	0.0777571		GSK3A	RBL2	T986	NetworKIN	0.328104		GSK3A	RBL2	T986	NetworKIN	0.146114
		GSK3B	CDKN1B	S10	NetworKIN	-0.528298		GSK3B	CDKN1B	S10	NetworKIN	-0.157325		GSK3B	CDKN1B	S10	NetworKIN	-0.0046816		GSK3B	CDKN1B	S10	NetworKIN	-0.180952
		GSK3B	PXN	S106	NetworKIN	0.482801		GSK3B	PXN	S106	NetworKIN	0.549764		GSK3B	PXN	S106	NetworKIN	0.162662		GSK3B	PXN	S106	NetworKIN	0.628238
		GSK3B	IRS1	S1078	NetworKIN	-0.388847		GSK3B	IRS1	S1078	NetworKIN	-0.342383		GSK3B	IRS1	S1078	NetworKIN	0.0418062		GSK3B	IRS1	S1078	NetworKIN	-0.156188
		GSK3B	IRS1	S1101	NetworKIN	-0.436822		GSK3B	IRS1	S1101	NetworKIN	-0.460267		GSK3B	IRS1	S1101	NetworKIN	0.223994		GSK3B	IRS1	S1101	NetworKIN	0.132442
		GSK3B	MAP1B	S1256	NetworKIN	-0.25409		GSK3B	MAP1B	S1256	NetworKIN	0.106134		GSK3B	MAP1B	S1256	NetworKIN	0.154528		GSK3B	MAP1B	S1256	NetworKIN	0.00145506
		GSK3B	PXN	S126	NetworKIN	0.250943		GSK3B	PXN	S126	NetworKIN	0.352722		GSK3B	PXN	S126	NetworKIN	0.321774		GSK3B	PXN	S126	NetworKIN	0.637746
		GSK3B	MAP1B	S1260	NetworKIN	0.140396		GSK3B	MAP1B	S1260	NetworKIN	0.0562297		GSK3B	MAP1B	S1260	NetworKIN	0.124721		GSK3B	MAP1B	S1260	NetworKIN	-0.132018
		GSK3B	MTOR	S1261	NetworKIN	0.846938		GSK3B	MTOR	S1261	NetworKIN	0.611645		GSK3B	MTOR	S1261	NetworKIN	0.184585		GSK3B	MTOR	S1261	NetworKIN	-0.263957
		GSK3B	MAP1B	S1262	NetworKIN	0.454568		GSK3B	MAP1B	S1262	NetworKIN	0.15554		GSK3B	MAP1B	S1262	NetworKIN	0.342966		GSK3B	MAP1B	S1262	NetworKIN	0.196901
		GSK3B	MAP1B	S1265	NetworKIN	-0.231074		GSK3B	MAP1B	S1265	NetworKIN	0.365886		GSK3B	MAP1B	S1265	NetworKIN	0.245004		GSK3B	MAP1B	S1265	NetworKIN	0.172535
		GSK3B	PXN	S130	NetworKIN	0.134353		GSK3B	PXN	S130	NetworKIN	0.244504		GSK3B	PXN	S130	NetworKIN	0.271262		GSK3B	PXN	S130	NetworKIN	0.474685
		GSK3B	TSC2	S1388	NetworKIN	-0.665574		GSK3B	TSC2	S1388	NetworKIN	0.312593		GSK3B	TSC2	S1388	NetworKIN	0.345871		GSK3B	TSC2	S1388	NetworKIN	-0.03507
		GSK3B	MAP1B	S1389	NetworKIN	-1.2018		GSK3B	MAP1B	S1389	NetworKIN	0.390225		GSK3B	MAP1B	S1389	NetworKIN	-0.0347509		GSK3B	MAP1B	S1389	NetworKIN	0.508869
		GSK3B	MAP1B	S1396	NetworKIN	-0.126766		GSK3B	MAP1B	S1396	NetworKIN	0.697487		GSK3B	MAP1B	S1396	NetworKIN	0.375667		GSK3B	MAP1B	S1396	NetworKIN	0.498846
		GSK3B	MAP1B	S1400	NetworKIN	0.640696		GSK3B	MAP1B	S1400	NetworKIN	0.425232		GSK3B	MAP1B	S1400	NetworKIN	0.697381		GSK3B	MAP1B	S1400	NetworKIN	0.547198
		GSK3B	TSC2	S1411	NetworKIN	0.187904		GSK3B	TSC2	S1411	NetworKIN	-0.0176994		GSK3B	TSC2	S1411	NetworKIN	-0.148274		GSK3B	TSC2	S1411	NetworKIN	0.0432427
		GSK3B	MAP1B	S1427	NetworKIN	-0.489078		GSK3B	MAP1B	S1427	NetworKIN	0.42245		GSK3B	MAP1B	S1427	NetworKIN	0.383606		GSK3B	MAP1B	S1427	NetworKIN	0.149392
		GSK3B	CLIP1	S143	NetworKIN	-0.331444		GSK3B	CLIP1	S143	NetworKIN	0.180319		GSK3B	CLIP1	S143	NetworKIN	0.0773774		GSK3B	CLIP1	S143	NetworKIN	-0.0659771
		GSK3B	CLIP1	S147	NetworKIN	-0.0369325		GSK3B	CLIP1	S147	NetworKIN	-0.292005		GSK3B	CLIP1	S147	NetworKIN	0.521495		GSK3B	CLIP1	S147	NetworKIN	0.0356213
		GSK3B	MAP1B	S1501	NetworKIN	-0.254099		GSK3B	MAP1B	S1501	NetworKIN	0.553985		GSK3B	MAP1B	S1501	NetworKIN	0.452864		GSK3B	MAP1B	S1501	NetworKIN	0.164316
		GSK3B	TPPP	S160	NetworKIN	-0.833379		GSK3B	TPPP	S160	NetworKIN	-0.280649		GSK3B	TPPP	S160	NetworKIN	0.0965081		GSK3B	TPPP	S160	NetworKIN	-0.139104
		GSK3B	MAP1B	S1779	NetworKIN	-0.948941		GSK3B	MAP1B	S1779	NetworKIN	0.580999		GSK3B	MAP1B	S1779	NetworKIN	0.841979		GSK3B	MAP1B	S1779	NetworKIN	0.0737492
		GSK3B	CDKN1B	S178	NetworKIN	-0.765252		GSK3B	CDKN1B	S178	NetworKIN	-0.0200448		GSK3B	CDKN1B	S178	NetworKIN	0.141546		GSK3B	CDKN1B	S178	NetworKIN	-0.289854
		GSK3B	MAP1B	S1793	NetworKIN	0.769992		GSK3B	MAP1B	S1793	NetworKIN	0.230411		GSK3B	MAP1B	S1793	NetworKIN	0.530199		GSK3B	MAP1B	S1793	NetworKIN	0.68928
		GSK3B	MAP1B	S1797	NetworKIN	0.756087		GSK3B	MAP1B	S1797	NetworKIN	0.254594		GSK3B	MAP1B	S1797	NetworKIN	0.507344		GSK3B	MAP1B	S1797	NetworKIN	0.693856
		GSK3B	MAP1B	S1819	NetworKIN	-0.891206		GSK3B	MAP1B	S1819	NetworKIN	0.226501		GSK3B	MAP1B	S1819	NetworKIN	0.0934097		GSK3B	MAP1B	S1819	NetworKIN	0.0175228
		GSK3B	JUP	S182	NetworKIN	0.104036		GSK3B	JUP	S182	NetworKIN	-0.0318395		GSK3B	JUP	S182	NetworKIN	0.271787		GSK3B	JUP	S182	NetworKIN	0.024265
		GSK3B	MAP1B	S1915	NetworKIN	-0.241206		GSK3B	MAP1B	S1915	NetworKIN	0.052014		GSK3B	MAP1B	S1915	NetworKIN	0.0933937		GSK3B	MAP1B	S1915	NetworKIN	0.141555
		GSK3B	CLIP1	S200	NetworKIN	-0.583199		GSK3B	CLIP1	S200	NetworKIN	0.235591		GSK3B	CLIP1	S200	NetworKIN	0.506674		GSK3B	CLIP1	S200	NetworKIN	0.0716068
		GSK3B	CLIP1	S204	NetworKIN	-1.03375		GSK3B	CLIP1	S204	NetworKIN	-0.318561		GSK3B	CLIP1	S204	NetworKIN	0.183386		GSK3B	CLIP1	S204	NetworKIN	-0.122329
		GSK3B	CTNND1	S230	NetworKIN	-0.739874		GSK3B	CTNND1	S230	NetworKIN	-0.268686		GSK3B	CTNND1	S230	NetworKIN	-0.0260527		GSK3B	CTNND1	S230	NetworKIN	-0.0708824
		GSK3B	MTOR	S2481	NetworKIN	-0.168194		GSK3B	MTOR	S2481	NetworKIN	0.40866		GSK3B	MTOR	S2481	NetworKIN	0.62331		GSK3B	MTOR	S2481	NetworKIN	0.16587
		GSK3B	FOXO3	S253	NetworKIN	-0.0652574		GSK3B	FOXO3	S253	NetworKIN	-0.250179		GSK3B	FOXO3	S253	NetworKIN	0.573233		GSK3B	FOXO3	S253	NetworKIN	0.244162
		GSK3B	CTNND1	S269	NetworKIN	-0.619402		GSK3B	CTNND1	S269	NetworKIN	-0.282514		GSK3B	CTNND1	S269	NetworKIN	0.272228		GSK3B	CTNND1	S269	NetworKIN	0.077411
		GSK3B	FOXO1	S287	NetworKIN	-0.491937		GSK3B	FOXO1	S287	NetworKIN	0.173654		GSK3B	FOXO1	S287	NetworKIN	0.225351		GSK3B	FOXO1	S287	NetworKIN	-0.0751309
		GSK3B	PPP1R3C	S293	NetworKIN	-0.233192		GSK3B	PPP1R3C	S293	NetworKIN	0.0215583		GSK3B	PPP1R3C	S293	NetworKIN	0.57867		GSK3B	PPP1R3C	S293	NetworKIN	0.0532328
		GSK3B	IRS1	S3	NetworKIN	-0.20939		GSK3B	IRS1	S3	NetworKIN	-0.130666		GSK3B	IRS1	S3	NetworKIN	-0.0778996		GSK3B	IRS1	S3	NetworKIN	0.0320856
		GSK3B	HSF1	S307	NetworKIN	-0.123465		GSK3B	HSF1	S307	NetworKIN	0.130728		GSK3B	HSF1	S307	NetworKIN	0.25749		GSK3B	HSF1	S307	NetworKIN	-0.424613
		GSK3B	IRS1	S312	NetworKIN	-0.517916		GSK3B	IRS1	S312	NetworKIN	0.0484965		GSK3B	IRS1	S312	NetworKIN	0.353662		GSK3B	IRS1	S312	NetworKIN	0.348236
		GSK3B	IRS1	S337	NetworKIN	-0.0672215		GSK3B	IRS1	S337	NetworKIN	-0.317853		GSK3B	IRS1	S337	NetworKIN	-0.125926		GSK3B	IRS1	S337	NetworKIN	-0.127212
		GSK3B	IRS1	S341	NetworKIN	-0.0864353		GSK3B	IRS1	S341	NetworKIN	-0.287902		GSK3B	IRS1	S341	NetworKIN	0.111322		GSK3B	IRS1	S341	NetworKIN	-0.0952166
		GSK3B	TBC1D4	S344	NetworKIN	-0.763077		GSK3B	TBC1D4	S344	NetworKIN	-0.225551		GSK3B	TBC1D4	S344	NetworKIN	0.586182		GSK3B	TBC1D4	S344	NetworKIN	0.17067
		GSK3B	IRS1	S348	NetworKIN	-0.186318		GSK3B	IRS1	S348	NetworKIN	-0.0961616		GSK3B	IRS1	S348	NetworKIN	0.101395		GSK3B	IRS1	S348	NetworKIN	-0.0400865
		GSK3B	CTNND1	S349	NetworKIN	-0.27484		GSK3B	CTNND1	S349	NetworKIN	0.0381353		GSK3B	CTNND1	S349	NetworKIN	0.105504		GSK3B	CTNND1	S349	NetworKIN	0.0298407
		GSK3B	CTNND1	S352	NetworKIN	-0.14197		GSK3B	CTNND1	S352	NetworKIN	0.147211		GSK3B	CTNND1	S352	NetworKIN	-0.0328977		GSK3B	CTNND1	S352	NetworKIN	-0.0847105
		GSK3B	HSF1	S363	NetworKIN	8.89996e-06		GSK3B	HSF1	S363	NetworKIN	0.143189		GSK3B	HSF1	S363	NetworKIN	0.517889		GSK3B	HSF1	S363	NetworKIN	0.235229
		GSK3B	PTEN	S370	NetworKIN	-0.0744926		GSK3B	PTEN	S370	NetworKIN	-0.233679		GSK3B	PTEN	S370	NetworKIN	0.633936		GSK3B	PTEN	S370	NetworKIN	0.369794
		GSK3B	PRKAA2	S377	NetworKIN	-0.748038		GSK3B	PRKAA2	S377	NetworKIN	-0.159831		GSK3B	PRKAA2	S377	NetworKIN	0.464409		GSK3B	PRKAA2	S377	NetworKIN	0.0175332
		GSK3B	PCM1	S386	NetworKIN	-0.585657		GSK3B	PCM1	S386	NetworKIN	0.123412		GSK3B	PCM1	S386	NetworKIN	-0.439165		GSK3B	PCM1	S386	NetworKIN	-0.474929
		GSK3B	CTNND1	S4	NetworKIN	0.139553		GSK3B	CTNND1	S4	NetworKIN	0.225881		GSK3B	CTNND1	S4	NetworKIN	-0.114091		GSK3B	CTNND1	S4	NetworKIN	0.307223
		GSK3B	PPP2R5A	S42	NetworKIN	-0.388945		GSK3B	PPP2R5A	S42	NetworKIN	-0.161755		GSK3B	PPP2R5A	S42	NetworKIN	-0.0970852		GSK3B	PPP2R5A	S42	NetworKIN	-0.103596
		GSK3B	SLC25A4	S42	NetworKIN	0.98526		GSK3B	SLC25A4	S42	NetworKIN	0.0169034		GSK3B	SLC25A4	S42	NetworKIN	0.202377		GSK3B	SLC25A4	S42	NetworKIN	0.107481
		GSK3B	FOXO3	S425	NetworKIN	0.0562367		GSK3B	FOXO3	S425	NetworKIN	0.370337		GSK3B	FOXO3	S425	NetworKIN	-0.0204672		GSK3B	FOXO3	S425	NetworKIN	0.683467
		GSK3B	TPPP	S45	NetworKIN	-0.204712		GSK3B	TPPP	S45	NetworKIN	0.270763		GSK3B	TPPP	S45	NetworKIN	0.0332534		GSK3B	TPPP	S45	NetworKIN	0.0372533
		GSK3B	PI4K2A	S47	NetworKIN	-0.033871		GSK3B	PI4K2A	S47	NetworKIN	0.191235		GSK3B	PI4K2A	S47	NetworKIN	0.104232		GSK3B	PI4K2A	S47	NetworKIN	-0.0021462
		GSK3B	FOXO1	S470	NetworKIN	-0.422833		GSK3B	FOXO1	S470	NetworKIN	0.488398		GSK3B	FOXO1	S470	NetworKIN	0.242123		GSK3B	FOXO1	S470	NetworKIN	0.030756
		GSK3B	AKT2	S474	NetworKIN	-0.218463		GSK3B	AKT2	S474	NetworKIN	-0.0712267		GSK3B	AKT2	S474	NetworKIN	0.148073		GSK3B	AKT2	S474	NetworKIN	0.0791953
		GSK3B	CLIP1	S48	NetworKIN	-0.489015		GSK3B	CLIP1	S48	NetworKIN	0.193961		GSK3B	CLIP1	S48	NetworKIN	0.123898		GSK3B	CLIP1	S48	NetworKIN	-0.139983
		GSK3B	ACLY	S481	NetworKIN	-0.397041		GSK3B	ACLY	S481	NetworKIN	0.270656		GSK3B	ACLY	S481	NetworKIN	0.137411		GSK3B	ACLY	S481	NetworKIN	0.131865
		GSK3B	PPP2R5A	S49	NetworKIN	0.0594778		GSK3B	PPP2R5A	S49	NetworKIN	0.7497		GSK3B	PPP2R5A	S49	NetworKIN	0.230973		GSK3B	PPP2R5A	S49	NetworKIN	0.00866888
		GSK3B	PI4K2A	S51	NetworKIN	-0.0894266		GSK3B	PI4K2A	S51	NetworKIN	0.220696		GSK3B	PI4K2A	S51	NetworKIN	-0.130818		GSK3B	PI4K2A	S51	NetworKIN	-0.0275557
		GSK3B	IRS1	S527	NetworKIN	-0.352686		GSK3B	IRS1	S527	NetworKIN	-0.281124		GSK3B	IRS1	S527	NetworKIN	0.150522		GSK3B	IRS1	S527	NetworKIN	0.123649
		GSK3B	IRS1	S531	NetworKIN	-0.506915		GSK3B	IRS1	S531	NetworKIN	-0.328371		GSK3B	IRS1	S531	NetworKIN	0.200626		GSK3B	IRS1	S531	NetworKIN	-0.0269413
		GSK3B	TBC1D4	S566	NetworKIN	-0.437561		GSK3B	TBC1D4	S566	NetworKIN	0.0901976		GSK3B	TBC1D4	S566	NetworKIN	-0.162263		GSK3B	TBC1D4	S566	NetworKIN	-0.0684936
		GSK3B	TBC1D4	S570	NetworKIN	-0.262862		GSK3B	TBC1D4	S570	NetworKIN	-0.126642		GSK3B	TBC1D4	S570	NetworKIN	0.154913		GSK3B	TBC1D4	S570	NetworKIN	0.259523
		GSK3B	TBC1D4	S591	NetworKIN	-0.253556		GSK3B	TBC1D4	S591	NetworKIN	-0.109364		GSK3B	TBC1D4	S591	NetworKIN	0.115423		GSK3B	TBC1D4	S591	NetworKIN	-0.160858
		GSK3B	DDX3X	S594	NetworKIN	-0.333649		GSK3B	DDX3X	S594	NetworKIN	0.365012		GSK3B	DDX3X	S594	NetworKIN	0.0187176		GSK3B	DDX3X	S594	NetworKIN	-0.0721046
		GSK3B	BCAM	S598	NetworKIN	-0.2807		GSK3B	BCAM	S598	NetworKIN	0.0231721		GSK3B	BCAM	S598	NetworKIN	0.230332		GSK3B	BCAM	S598	NetworKIN	0.204429
		GSK3B	DDX3X	S612	NetworKIN	-0.289632		GSK3B	DDX3X	S612	NetworKIN	0.322193		GSK3B	DDX3X	S612	NetworKIN	-0.186976		GSK3B	DDX3X	S612	NetworKIN	-0.024532
		GSK3B	PCM1	S643	NetworKIN	0.0177486		GSK3B	PCM1	S643	NetworKIN	0.306099		GSK3B	PCM1	S643	NetworKIN	0.860465		GSK3B	PCM1	S643	NetworKIN	-0.0612135
		GSK3B	PCM1	S65	NetworKIN	-0.108178		GSK3B	PCM1	S65	NetworKIN	-0.0117796		GSK3B	PCM1	S65	NetworKIN	0.0883303		GSK3B	PCM1	S65	NetworKIN	-0.0839047
		GSK3B	PCM1	S69	NetworKIN	-0.351015		GSK3B	PCM1	S69	NetworKIN	-0.144387		GSK3B	PCM1	S69	NetworKIN	0.0673816		GSK3B	PCM1	S69	NetworKIN	-0.200237
		GSK3B	CRTC2	S70	NetworKIN	-0.291858		GSK3B	CRTC2	S70	NetworKIN	-0.119446		GSK3B	CRTC2	S70	NetworKIN	0.143433		GSK3B	CRTC2	S70	NetworKIN	-0.0528032
		GSK3B	JUN	S73	NetworKIN	0.571589		GSK3B	JUN	S73	NetworKIN	0.577378		GSK3B	JUN	S73	NetworKIN	0.174698		GSK3B	JUN	S73	NetworKIN	0.828948
		GSK3B	BAD	S75	NetworKIN	-0.425042		GSK3B	BAD	S75	NetworKIN	0.0516968		GSK3B	BAD	S75	NetworKIN	0.16052		GSK3B	BAD	S75	NetworKIN	0.130798
		GSK3B	PPP1R2	S77	NetworKIN	0.147756		GSK3B	PPP1R2	S77	NetworKIN	-0.0767107		GSK3B	PPP1R2	S77	NetworKIN	-0.137344		GSK3B	PPP1R2	S77	NetworKIN	-0.262954
		GSK3B	DDX3X	S82	NetworKIN	-0.150722		GSK3B	DDX3X	S82	NetworKIN	0.205439		GSK3B	DDX3X	S82	NetworKIN	-0.0725366		GSK3B	DDX3X	S82	NetworKIN	0.021317
		GSK3B	MAP1B	S828	NetworKIN	-0.251774		GSK3B	MAP1B	S828	NetworKIN	0.413028		GSK3B	MAP1B	S828	NetworKIN	0.53591		GSK3B	MAP1B	S828	NetworKIN	0.0704422
		GSK3B	PXN	S83	NetworKIN	-0.276617		GSK3B	PXN	S83	NetworKIN	0.425102		GSK3B	PXN	S83	NetworKIN	0.176491		GSK3B	PXN	S83	NetworKIN	0.0728466
		GSK3B	PXN	S84	NetworKIN	-0.289844		GSK3B	PXN	S84	NetworKIN	0.335265		GSK3B	PXN	S84	NetworKIN	-0.155781		GSK3B	PXN	S84	NetworKIN	0.0987701
		GSK3B	CTNND1	S857	NetworKIN	-0.617463		GSK3B	CTNND1	S857	NetworKIN	-0.0668871		GSK3B	CTNND1	S857	NetworKIN	0.173135		GSK3B	CTNND1	S857	NetworKIN	0.231568
		GSK3B	PCM1	S861	NetworKIN	-0.488242		GSK3B	PCM1	S861	NetworKIN	0.00932416		GSK3B	PCM1	S861	NetworKIN	0.210848		GSK3B	PCM1	S861	NetworKIN	0.0311588
		GSK3B	CTNND1	S864	NetworKIN	-0.0511112		GSK3B	CTNND1	S864	NetworKIN	0.232097		GSK3B	CTNND1	S864	NetworKIN	0.0895383		GSK3B	CTNND1	S864	NetworKIN	0.0297404
		GSK3B	PCM1	S866	NetworKIN	-0.204271		GSK3B	PCM1	S866	NetworKIN	0.0937203		GSK3B	PCM1	S866	NetworKIN	0.270798		GSK3B	PCM1	S866	NetworKIN	0.0153778
		GSK3B	CTNND1	S868	NetworKIN	-0.526405		GSK3B	CTNND1	S868	NetworKIN	-0.21649		GSK3B	CTNND1	S868	NetworKIN	0.0203878		GSK3B	CTNND1	S868	NetworKIN	-0.011792
		GSK3B	PPP1R2	S87	NetworKIN	-0.00560038		GSK3B	PPP1R2	S87	NetworKIN	-0.0923763		GSK3B	PPP1R2	S87	NetworKIN	0.0604324		GSK3B	PPP1R2	S87	NetworKIN	-0.0387553
		GSK3B	CTNND1	S899	NetworKIN	-0.37998		GSK3B	CTNND1	S899	NetworKIN	-0.266413		GSK3B	CTNND1	S899	NetworKIN	0.048055		GSK3B	CTNND1	S899	NetworKIN	-0.222407
		GSK3B	PCM1	S93	NetworKIN	0.0328982		GSK3B	PCM1	S93	NetworKIN	1.33252		GSK3B	PCM1	S93	NetworKIN	-0.312099		GSK3B	PCM1	S93	NetworKIN	0.205923
		GSK3B	RBL2	S952	NetworKIN	0.0813378		GSK3B	RBL2	S952	NetworKIN	0.25072		GSK3B	RBL2	S952	NetworKIN	0.0865094		GSK3B	RBL2	S952	NetworKIN	0.166277
		GSK3B	RBL2	S981	NetworKIN	-0.18188		GSK3B	RBL2	S981	NetworKIN	0.0690017		GSK3B	RBL2	S981	NetworKIN	0.451126		GSK3B	RBL2	S981	NetworKIN	0.134659
		GSK3B	RBL2	S982	NetworKIN	-0.13832		GSK3B	RBL2	S982	NetworKIN	0.108639		GSK3B	RBL2	S982	NetworKIN	0.512845		GSK3B	RBL2	S982	NetworKIN	0.159421
		GSK3B	MAP1B	S995	NetworKIN	-1.08638		GSK3B	MAP1B	S995	NetworKIN	0.696309		GSK3B	MAP1B	S995	NetworKIN	0.432385		GSK3B	MAP1B	S995	NetworKIN	0.381543
		GSK3B	PRKAR2A	T104	NetworKIN	-0.076431		GSK3B	PRKAR2A	T104	NetworKIN	-0.196348		GSK3B	PRKAR2A	T104	NetworKIN	0.0190854		GSK3B	PRKAR2A	T104	NetworKIN	-0.0991012
		GSK3B	PXN	T132	NetworKIN	0.274383		GSK3B	PXN	T132	NetworKIN	0.0720247		GSK3B	PXN	T132	NetworKIN	0.165727		GSK3B	PXN	T132	NetworKIN	0.36934
		GSK3B	TPPP	T14	NetworKIN	-0.292932		GSK3B	TPPP	T14	NetworKIN	0.0975464		GSK3B	TPPP	T14	NetworKIN	0.169341		GSK3B	TPPP	T14	NetworKIN	0.0561692
		GSK3B	CLIP1	T140	NetworKIN	-0.132782		GSK3B	CLIP1	T140	NetworKIN	0.141952		GSK3B	CLIP1	T140	NetworKIN	0.441652		GSK3B	CLIP1	T140	NetworKIN	-0.19982
		GSK3B	TSC2	T1462	NetworKIN	0.0392118		GSK3B	TSC2	T1462	NetworKIN	0.223093		GSK3B	TSC2	T1462	NetworKIN	0.100408		GSK3B	TSC2	T1462	NetworKIN	-0.0246047
		GSK3B	MAP1B	T1503	NetworKIN	-0.269203		GSK3B	MAP1B	T1503	NetworKIN	0.334314		GSK3B	MAP1B	T1503	NetworKIN	-0.0316029		GSK3B	MAP1B	T1503	NetworKIN	0.0393644
		GSK3B	PRKAA2	T172	NetworKIN	-0.0931312		GSK3B	PRKAA2	T172	NetworKIN	0.11349		GSK3B	PRKAA2	T172	NetworKIN	0.217997		GSK3B	PRKAA2	T172	NetworKIN	0.134171
		GSK3B	CTNND1	T177	NetworKIN	-0.293461		GSK3B	CTNND1	T177	NetworKIN	-0.110011		GSK3B	CTNND1	T177	NetworKIN	0.316734		GSK3B	CTNND1	T177	NetworKIN	0.195994
		GSK3B	CLIP1	T182	NetworKIN	-0.664763		GSK3B	CLIP1	T182	NetworKIN	0.141083		GSK3B	CLIP1	T182	NetworKIN	0.326972		GSK3B	CLIP1	T182	NetworKIN	-0.048835
		GSK3B	MAPK1	T185	NetworKIN	0.577583		GSK3B	MAPK1	T185	NetworKIN	0.291315		GSK3B	MAPK1	T185	NetworKIN	0.0295839		GSK3B	MAPK1	T185	NetworKIN	-0.341029
		GSK3B	CLIP1	T191	NetworKIN	-0.760161		GSK3B	CLIP1	T191	NetworKIN	-0.109779		GSK3B	CLIP1	T191	NetworKIN	0.301468		GSK3B	CLIP1	T191	NetworKIN	-0.453582
		GSK3B	CLIP1	T350	NetworKIN	0.287849		GSK3B	CLIP1	T350	NetworKIN	0.732263		GSK3B	CLIP1	T350	NetworKIN	0.049306		GSK3B	CLIP1	T350	NetworKIN	-0.358921
		GSK3B	EIF4EBP1	T36	NetworKIN	-1.22295		GSK3B	EIF4EBP1	T36	NetworKIN	-0.591305		GSK3B	EIF4EBP1	T36	NetworKIN	0.202765		GSK3B	EIF4EBP1	T36	NetworKIN	0.055227
		GSK3B	HIST1H1B	T4	NetworKIN	-0.223691		GSK3B	HIST1H1B	T4	NetworKIN	0.0259649		GSK3B	HIST1H1B	T4	NetworKIN	0.134536		GSK3B	HIST1H1B	T4	NetworKIN	0.136759
		GSK3B	AKT2	T451	NetworKIN	0.0929033		GSK3B	AKT2	T451	NetworKIN	0.398473		GSK3B	AKT2	T451	NetworKIN	0.39947		GSK3B	AKT2	T451	NetworKIN	0.04948
		GSK3B	SLC2A1	T478	NetworKIN	-1.39109		GSK3B	SLC2A1	T478	NetworKIN	0.375512		GSK3B	SLC2A1	T478	NetworKIN	-0.691461		GSK3B	SLC2A1	T478	NetworKIN	0.409524
		GSK3B	SLC2A4	T486	NetworKIN	-0.132782		GSK3B	SLC2A4	T486	NetworKIN	0.223433		GSK3B	SLC2A4	T486	NetworKIN	0.0409701		GSK3B	SLC2A4	T486	NetworKIN	-0.0379009
		GSK3B	IRS1	T530	NetworKIN	-0.60952		GSK3B	IRS1	T530	NetworKIN	-0.248466		GSK3B	IRS1	T530	NetworKIN	0.346346		GSK3B	IRS1	T530	NetworKIN	0.0823952
		GSK3B	CTNND1	T59	NetworKIN	-0.516061		GSK3B	CTNND1	T59	NetworKIN	0.212638		GSK3B	CTNND1	T59	NetworKIN	0.4489		GSK3B	CTNND1	T59	NetworKIN	0.256268
		GSK3B	EIF4EBP1	T70	NetworKIN	-0.588		GSK3B	EIF4EBP1	T70	NetworKIN	-0.17976		GSK3B	EIF4EBP1	T70	NetworKIN	0.14685		GSK3B	EIF4EBP1	T70	NetworKIN	-0.177883
		GSK3B	PCM1	T859	NetworKIN	-0.230587		GSK3B	PCM1	T859	NetworKIN	0.0176498		GSK3B	PCM1	T859	NetworKIN	0.239157		GSK3B	PCM1	T859	NetworKIN	-0.312569
		GSK3B	CTNND1	T869	NetworKIN	-0.709655		GSK3B	CTNND1	T869	NetworKIN	-0.374616		GSK3B	CTNND1	T869	NetworKIN	0.0673438		GSK3B	CTNND1	T869	NetworKIN	0.0436361
		GSK3B	RBL2	T986	NetworKIN	-0.165582		GSK3B	RBL2	T986	NetworKIN	0.0777571		GSK3B	RBL2	T986	NetworKIN	0.328104		GSK3B	RBL2	T986	NetworKIN	0.146114
		HIPK1	PML	S403	NetworKIN	-0.231727		HIPK1	PML	S403	NetworKIN	0.307658		HIPK1	PML	S403	NetworKIN	0.189935		HIPK1	PML	S403	NetworKIN	0.0372123
		HIPK1	PML	S518	NetworKIN	-0.185972		HIPK1	PML	S518	NetworKIN	0.126151		HIPK1	PML	S518	NetworKIN	0.186494		HIPK1	PML	S518	NetworKIN	0.12446
		HIPK1	PML	S530	NetworKIN	-0.220377		HIPK1	PML	S530	NetworKIN	0.190638		HIPK1	PML	S530	NetworKIN	0.215315		HIPK1	PML	S530	NetworKIN	0.125387
		HIPK1	PML	S535	NetworKIN	0.0698603		HIPK1	PML	S535	NetworKIN	0.146707		HIPK1	PML	S535	NetworKIN	0.599211		HIPK1	PML	S535	NetworKIN	0.196883
		HIPK1	PML	S8	NetworKIN	-0.149804		HIPK1	PML	S8	NetworKIN	0.0337018		HIPK1	PML	S8	NetworKIN	0.340992		HIPK1	PML	S8	NetworKIN	0.0520221
		HIPK2	RANBP2	S1160	NetworKIN	-0.584612		HIPK2	RANBP2	S1160	NetworKIN	0.0547332		HIPK2	RANBP2	S1160	NetworKIN	0.117841		HIPK2	RANBP2	S1160	NetworKIN	-0.194906
		HIPK2	EGFR	S1166	NetworKIN	-0.742695		HIPK2	EGFR	S1166	NetworKIN	0.181343		HIPK2	EGFR	S1166	NetworKIN	0.0455547		HIPK2	EGFR	S1166	NetworKIN	-0.0388756
		HIPK2	NPM1	S125	NetworKIN	-0.535003		HIPK2	NPM1	S125	NetworKIN	0.0958347		HIPK2	NPM1	S125	NetworKIN	0.287683		HIPK2	NPM1	S125	NetworKIN	-0.00869317
		HIPK2	SIRT1	S14	NetworKIN	-0.212806		HIPK2	SIRT1	S14	NetworKIN	-0.0950274		HIPK2	SIRT1	S14	NetworKIN	0.079182		HIPK2	SIRT1	S14	NetworKIN	-0.0402563
		HIPK2	PARD3	S144	NetworKIN	-0.213186		HIPK2	PARD3	S144	NetworKIN	0.189657		HIPK2	PARD3	S144	NetworKIN	0.337586		HIPK2	PARD3	S144	NetworKIN	0.0780636
		HIPK2	HIVEP2	S1447	NetworKIN	-0.217576		HIPK2	HIVEP2	S1447	NetworKIN	1.20473		HIPK2	HIVEP2	S1447	NetworKIN	0.314521		HIPK2	HIVEP2	S1447	NetworKIN	-0.142532
		HIPK2	RANBP2	S1456	NetworKIN	-0.148508		HIPK2	RANBP2	S1456	NetworKIN	1.13843		HIPK2	RANBP2	S1456	NetworKIN	0.102607		HIPK2	RANBP2	S1456	NetworKIN	-0.0390535
		HIPK2	RANBP2	S1509	NetworKIN	0.0243175		HIPK2	RANBP2	S1509	NetworKIN	0.878701		HIPK2	RANBP2	S1509	NetworKIN	0.227805		HIPK2	RANBP2	S1509	NetworKIN	-0.228987
		HIPK2	MAVS	S152	NetworKIN	0.222677		HIPK2	MAVS	S152	NetworKIN	0.867421		HIPK2	MAVS	S152	NetworKIN	0.0614832		HIPK2	MAVS	S152	NetworKIN	0.880287
		HIPK2	ERC1	S17	NetworKIN	-1.08704		HIPK2	ERC1	S17	NetworKIN	-0.0175971		HIPK2	ERC1	S17	NetworKIN	0.170902		HIPK2	ERC1	S17	NetworKIN	0.0213971
		HIPK2	TRIM28	S19	NetworKIN	-0.216339		HIPK2	TRIM28	S19	NetworKIN	0.0810884		HIPK2	TRIM28	S19	NetworKIN	0.0209304		HIPK2	TRIM28	S19	NetworKIN	-0.253461
		HIPK2	RANBP2	S2447	NetworKIN	-0.74117		HIPK2	RANBP2	S2447	NetworKIN	-0.0239799		HIPK2	RANBP2	S2447	NetworKIN	-0.105209		HIPK2	RANBP2	S2447	NetworKIN	-0.0928537
		HIPK2	FOXO1	S256	NetworKIN	-0.417025		HIPK2	FOXO1	S256	NetworKIN	-0.161306		HIPK2	FOXO1	S256	NetworKIN	0.339167		HIPK2	FOXO1	S256	NetworKIN	0.175884
		HIPK2	RANBP2	S2668	NetworKIN	-0.554578		HIPK2	RANBP2	S2668	NetworKIN	0.165935		HIPK2	RANBP2	S2668	NetworKIN	0.244035		HIPK2	RANBP2	S2668	NetworKIN	-0.0381855
		HIPK2	TP53BP1	S270	NetworKIN	-0.218746		HIPK2	TP53BP1	S270	NetworKIN	0.019618		HIPK2	TP53BP1	S270	NetworKIN	0.125975		HIPK2	TP53BP1	S270	NetworKIN	-0.179923
		HIPK2	LMNA	S277	NetworKIN	-0.0120951		HIPK2	LMNA	S277	NetworKIN	0.119583		HIPK2	LMNA	S277	NetworKIN	-0.0509589		HIPK2	LMNA	S277	NetworKIN	0.0668505
		HIPK2	FOXO1	S287	NetworKIN	-0.491937		HIPK2	FOXO1	S287	NetworKIN	0.173654		HIPK2	FOXO1	S287	NetworKIN	0.225351		HIPK2	FOXO1	S287	NetworKIN	-0.0751309
		HIPK2	LMNA	S301	NetworKIN	-0.303469		HIPK2	LMNA	S301	NetworKIN	0.208566		HIPK2	LMNA	S301	NetworKIN	0.160001		HIPK2	LMNA	S301	NetworKIN	-0.0530102
		HIPK2	MAP4K5	S335	NetworKIN	-0.515361		HIPK2	MAP4K5	S335	NetworKIN	0.729125		HIPK2	MAP4K5	S335	NetworKIN	0.368194		HIPK2	MAP4K5	S335	NetworKIN	0.331945
		HIPK2	CAV1	S37	NetworKIN	-0.463054		HIPK2	CAV1	S37	NetworKIN	0.146723		HIPK2	CAV1	S37	NetworKIN	0.153348		HIPK2	CAV1	S37	NetworKIN	-0.0553476
		HIPK2	LMNA	S392	NetworKIN	-0.132101		HIPK2	LMNA	S392	NetworKIN	0.181557		HIPK2	LMNA	S392	NetworKIN	-0.00831588		HIPK2	LMNA	S392	NetworKIN	0.0831362
		HIPK2	LMNA	S403	NetworKIN	0.0837687		HIPK2	LMNA	S403	NetworKIN	0.886862		HIPK2	LMNA	S403	NetworKIN	0.0651848		HIPK2	LMNA	S403	NetworKIN	0.0862561
		HIPK2	PML	S403	NetworKIN	-0.231727		HIPK2	PML	S403	NetworKIN	0.307658		HIPK2	PML	S403	NetworKIN	0.189935		HIPK2	PML	S403	NetworKIN	0.0372123
		HIPK2	LMNA	S414	NetworKIN	0.0867899		HIPK2	LMNA	S414	NetworKIN	0.540037		HIPK2	LMNA	S414	NetworKIN	-0.0840978		HIPK2	LMNA	S414	NetworKIN	0.0322994
		HIPK2	FOXK1	S416	NetworKIN	-0.319264		HIPK2	FOXK1	S416	NetworKIN	-0.200471		HIPK2	FOXK1	S416	NetworKIN	0.0353875		HIPK2	FOXK1	S416	NetworKIN	-0.0585398
		HIPK2	HDAC3	S424	NetworKIN	-0.416101		HIPK2	HDAC3	S424	NetworKIN	0.254998		HIPK2	HDAC3	S424	NetworKIN	0.174618		HIPK2	HDAC3	S424	NetworKIN	0.0248345
		HIPK2	HDAC4	S467	NetworKIN	-0.210882		HIPK2	HDAC4	S467	NetworKIN	0.581791		HIPK2	HDAC4	S467	NetworKIN	0.405821		HIPK2	HDAC4	S467	NetworKIN	-0.162936
		HIPK2	XRCC6	S475	NetworKIN	-0.580678		HIPK2	XRCC6	S475	NetworKIN	-0.0752871		HIPK2	XRCC6	S475	NetworKIN	-0.0769525		HIPK2	XRCC6	S475	NetworKIN	0.143427
		HIPK2	SLC2A4	S488	NetworKIN	-0.216969		HIPK2	SLC2A4	S488	NetworKIN	0.252813		HIPK2	SLC2A4	S488	NetworKIN	0.114474		HIPK2	SLC2A4	S488	NetworKIN	0.033741
		HIPK2	PML	S530	NetworKIN	-0.220377		HIPK2	PML	S530	NetworKIN	0.190638		HIPK2	PML	S530	NetworKIN	0.215315		HIPK2	PML	S530	NetworKIN	0.125387
		HIPK2	PML	S535	NetworKIN	0.0698603		HIPK2	PML	S535	NetworKIN	0.146707		HIPK2	PML	S535	NetworKIN	0.599211		HIPK2	PML	S535	NetworKIN	0.196883
		HIPK2	CTNNB1	S552	NetworKIN	0.0103464		HIPK2	CTNNB1	S552	NetworKIN	0.228096		HIPK2	CTNNB1	S552	NetworKIN	0.158061		HIPK2	CTNNB1	S552	NetworKIN	0.0525474
		HIPK2	HDAC4	S565	NetworKIN	0.115336		HIPK2	HDAC4	S565	NetworKIN	0.395555		HIPK2	HDAC4	S565	NetworKIN	0.267743		HIPK2	HDAC4	S565	NetworKIN	-0.125586
		HIPK2	LMNA	S615	NetworKIN	0.566218		HIPK2	LMNA	S615	NetworKIN	0.34879		HIPK2	LMNA	S615	NetworKIN	0.0755194		HIPK2	LMNA	S615	NetworKIN	0.124563
		HIPK2	LMNA	S616	NetworKIN	-0.00819978		HIPK2	LMNA	S616	NetworKIN	0.410313		HIPK2	LMNA	S616	NetworKIN	0.323264		HIPK2	LMNA	S616	NetworKIN	0.391173
		HIPK2	LMNA	S619	NetworKIN	-0.0858659		HIPK2	LMNA	S619	NetworKIN	0.0906753		HIPK2	LMNA	S619	NetworKIN	0.116084		HIPK2	LMNA	S619	NetworKIN	0.00102112
		HIPK2	HDAC4	S632	NetworKIN	-0.373879		HIPK2	HDAC4	S632	NetworKIN	0.633305		HIPK2	HDAC4	S632	NetworKIN	0.53748		HIPK2	HDAC4	S632	NetworKIN	-0.305869
		HIPK2	HDAC4	S633	NetworKIN	-0.218031		HIPK2	HDAC4	S633	NetworKIN	0.378919		HIPK2	HDAC4	S633	NetworKIN	0.194868		HIPK2	HDAC4	S633	NetworKIN	-0.142645
		HIPK2	HDAC4	S636	NetworKIN	-0.0154359		HIPK2	HDAC4	S636	NetworKIN	2.17983		HIPK2	HDAC4	S636	NetworKIN	0.300433		HIPK2	HDAC4	S636	NetworKIN	0.1324
		HIPK2	LMNA	S636	NetworKIN	-0.129011		HIPK2	LMNA	S636	NetworKIN	0.526222		HIPK2	LMNA	S636	NetworKIN	0.0986122		HIPK2	LMNA	S636	NetworKIN	-0.134011
		HIPK2	PPM1J	S76	NetworKIN	0.0538109		HIPK2	PPM1J	S76	NetworKIN	-0.23441		HIPK2	PPM1J	S76	NetworKIN	-0.041271		HIPK2	PPM1J	S76	NetworKIN	-0.0176136
		HIPK2	ADAM17	S791	NetworKIN	-0.154722		HIPK2	ADAM17	S791	NetworKIN	0.150687		HIPK2	ADAM17	S791	NetworKIN	0.185104		HIPK2	ADAM17	S791	NetworKIN	-0.053643
		HIPK2	MAPK1	T190	NetworKIN	-0.183651		HIPK2	MAPK1	T190	NetworKIN	0.217473		HIPK2	MAPK1	T190	NetworKIN	0.0605159		HIPK2	MAPK1	T190	NetworKIN	0.123523
		HIPK2	LMNA	T409	NetworKIN	-0.15288		HIPK2	LMNA	T409	NetworKIN	0.331106		HIPK2	LMNA	T409	NetworKIN	0.223486		HIPK2	LMNA	T409	NetworKIN	0.19879
		ICK	SMC3	S1067	NetworKIN	-0.264537		ICK	SMC3	S1067	NetworKIN	0.154629		ICK	SMC3	S1067	NetworKIN	0.18749		ICK	SMC3	S1067	NetworKIN	-0.23773
		ICK	MTOR	S1261	NetworKIN	0.846938		ICK	MTOR	S1261	NetworKIN	0.611645		ICK	MTOR	S1261	NetworKIN	0.184585		ICK	MTOR	S1261	NetworKIN	-0.263957
		ICK	MTOR	S2478	NetworKIN	-0.0634422		ICK	MTOR	S2478	NetworKIN	0.471664		ICK	MTOR	S2478	NetworKIN	0.711956		ICK	MTOR	S2478	NetworKIN	0.287632
		ICK	MTOR	S2481	NetworKIN	-0.168194		ICK	MTOR	S2481	NetworKIN	0.40866		ICK	MTOR	S2481	NetworKIN	0.62331		ICK	MTOR	S2481	NetworKIN	0.16587
		ICK	RPTOR	S722	NetworKIN	1.04311		ICK	RPTOR	S722	NetworKIN	1.18766		ICK	RPTOR	S722	NetworKIN	0.217013		ICK	RPTOR	S722	NetworKIN	-0.0400919
		ICK	RPTOR	S863	NetworKIN	-0.550615		ICK	RPTOR	S863	NetworKIN	0.156942		ICK	RPTOR	S863	NetworKIN	0.282162		ICK	RPTOR	S863	NetworKIN	0.182006
		ICK	RPTOR	S877	NetworKIN	-0.403301		ICK	RPTOR	S877	NetworKIN	-0.0970258		ICK	RPTOR	S877	NetworKIN	0.115499		ICK	RPTOR	S877	NetworKIN	0.14125
		ICK	RPTOR	S881	NetworKIN	-0.620067		ICK	RPTOR	S881	NetworKIN	-0.416429		ICK	RPTOR	S881	NetworKIN	-0.17075		ICK	RPTOR	S881	NetworKIN	-0.0199605
		IGF1R	MAPK1	Y187	NetworKIN	0.571604		IGF1R	MAPK1	Y187	NetworKIN	0.387487		IGF1R	MAPK1	Y187	NetworKIN	0.0231633		IGF1R	MAPK1	Y187	NetworKIN	-0.245997
		IGF1R	CTNND1	Y296	NetworKIN	-0.191919		IGF1R	CTNND1	Y296	NetworKIN	0.0811938		IGF1R	CTNND1	Y296	NetworKIN	0.21516		IGF1R	CTNND1	Y296	NetworKIN	0.0324202
		IGF1R	IRS1	Y612	NetworKIN	-0.364037		IGF1R	IRS1	Y612	NetworKIN	0.109707		IGF1R	IRS1	Y612	NetworKIN	0.143815		IGF1R	IRS1	Y612	NetworKIN	-0.120175
		IKBKB	IRS1	S1078	NetworKIN	-0.388847		IKBKB	IRS1	S1078	NetworKIN	-0.342383		IKBKB	IRS1	S1078	NetworKIN	0.0418062		IKBKB	IRS1	S1078	NetworKIN	-0.156188
		IKBKB	IRS1	S1100	NetworKIN	0.124628		IKBKB	IRS1	S1100	NetworKIN	0.142147		IKBKB	IRS1	S1100	NetworKIN	-0.489783		IKBKB	IRS1	S1100	NetworKIN	-0.178021
		IKBKB	IRS1	S1101	NetworKIN	-0.436822		IKBKB	IRS1	S1101	NetworKIN	-0.460267		IKBKB	IRS1	S1101	NetworKIN	0.223994		IKBKB	IRS1	S1101	NetworKIN	0.132442
		IKBKB	IRS1	S1222	NetworKIN	-0.550182		IKBKB	IRS1	S1222	NetworKIN	0.0800258		IKBKB	IRS1	S1222	NetworKIN	-0.124302		IKBKB	IRS1	S1222	NetworKIN	0.000435909
		IKBKB	TSC2	S1254	NetworKIN	-0.0289847		IKBKB	TSC2	S1254	NetworKIN	0.596952		IKBKB	TSC2	S1254	NetworKIN	0.227074		IKBKB	TSC2	S1254	NetworKIN	0.512923
		IKBKB	CDC37	S13	NetworKIN	-0.285085		IKBKB	CDC37	S13	NetworKIN	0.123287		IKBKB	CDC37	S13	NetworKIN	0.432775		IKBKB	CDC37	S13	NetworKIN	-0.12381
		IKBKB	TSC2	S1388	NetworKIN	-0.665574		IKBKB	TSC2	S1388	NetworKIN	0.312593		IKBKB	TSC2	S1388	NetworKIN	0.345871		IKBKB	TSC2	S1388	NetworKIN	-0.03507
		IKBKB	TSC2	S1411	NetworKIN	0.187904		IKBKB	TSC2	S1411	NetworKIN	-0.0176994		IKBKB	TSC2	S1411	NetworKIN	-0.148274		IKBKB	TSC2	S1411	NetworKIN	0.0432427
		IKBKB	TSC2	S1449	NetworKIN	-0.550769		IKBKB	TSC2	S1449	NetworKIN	-0.231362		IKBKB	TSC2	S1449	NetworKIN	-0.101635		IKBKB	TSC2	S1449	NetworKIN	0.0690418
		IKBKB	NCOR2	S149	NetworKIN	-0.218877		IKBKB	NCOR2	S149	NetworKIN	0.0796474		IKBKB	NCOR2	S149	NetworKIN	0.0575529		IKBKB	NCOR2	S149	NetworKIN	-0.147221
		IKBKB	HSPB1	S15	NetworKIN	1.34119		IKBKB	HSPB1	S15	NetworKIN	1.87711		IKBKB	HSPB1	S15	NetworKIN	-0.573784		IKBKB	HSPB1	S15	NetworKIN	1.55372
		IKBKB	MAVS	S152	NetworKIN	0.222677		IKBKB	MAVS	S152	NetworKIN	0.867421		IKBKB	MAVS	S152	NetworKIN	0.0614832		IKBKB	MAVS	S152	NetworKIN	0.880287
		IKBKB	NCOR2	S152	NetworKIN	-0.223786		IKBKB	NCOR2	S152	NetworKIN	0.10348		IKBKB	NCOR2	S152	NetworKIN	0.100377		IKBKB	NCOR2	S152	NetworKIN	-0.126666
		IKBKB	MAVS	S165	NetworKIN	0.0369255		IKBKB	MAVS	S165	NetworKIN	0.376449		IKBKB	MAVS	S165	NetworKIN	-0.0258897		IKBKB	MAVS	S165	NetworKIN	0.135331
		IKBKB	ERC1	S17	NetworKIN	-1.08704		IKBKB	ERC1	S17	NetworKIN	-0.0175971		IKBKB	ERC1	S17	NetworKIN	0.170902		IKBKB	ERC1	S17	NetworKIN	0.0213971
		IKBKB	SRC	S17	NetworKIN	-0.963667		IKBKB	SRC	S17	NetworKIN	0.12108		IKBKB	SRC	S17	NetworKIN	-0.415743		IKBKB	SRC	S17	NetworKIN	-0.00328094
		IKBKB	HSPB1	S199	NetworKIN	-0.567885		IKBKB	HSPB1	S199	NetworKIN	0.101556		IKBKB	HSPB1	S199	NetworKIN	0.201722		IKBKB	HSPB1	S199	NetworKIN	0.380848
		IKBKB	ERC1	S21	NetworKIN	-0.719635		IKBKB	ERC1	S21	NetworKIN	-0.218379		IKBKB	ERC1	S21	NetworKIN	0.00850111		IKBKB	ERC1	S21	NetworKIN	-0.0455032
		IKBKB	MAVS	S222	NetworKIN	-0.160477		IKBKB	MAVS	S222	NetworKIN	0.558133		IKBKB	MAVS	S222	NetworKIN	-0.0458663		IKBKB	MAVS	S222	NetworKIN	1.12766
		IKBKB	PRKCA	S226	NetworKIN	-0.366373		IKBKB	PRKCA	S226	NetworKIN	0.287196		IKBKB	PRKCA	S226	NetworKIN	0.302473		IKBKB	PRKCA	S226	NetworKIN	0.144232
		IKBKB	FOXO3	S253	NetworKIN	-0.0652574		IKBKB	FOXO3	S253	NetworKIN	-0.250179		IKBKB	FOXO3	S253	NetworKIN	0.573233		IKBKB	FOXO3	S253	NetworKIN	0.244162
		IKBKB	MAVS	S253	NetworKIN	-0.117502		IKBKB	MAVS	S253	NetworKIN	0.271539		IKBKB	MAVS	S253	NetworKIN	-0.236466		IKBKB	MAVS	S253	NetworKIN	-0.279517
		IKBKB	FOXO1	S256	NetworKIN	-0.417025		IKBKB	FOXO1	S256	NetworKIN	-0.161306		IKBKB	FOXO1	S256	NetworKIN	0.339167		IKBKB	FOXO1	S256	NetworKIN	0.175884
		IKBKB	IRS1	S270	NetworKIN	-0.202046		IKBKB	IRS1	S270	NetworKIN	-0.191829		IKBKB	IRS1	S270	NetworKIN	-0.130835		IKBKB	IRS1	S270	NetworKIN	0.060301
		IKBKB	SQSTM1	S272	NetworKIN	-0.11742		IKBKB	SQSTM1	S272	NetworKIN	0.361298		IKBKB	SQSTM1	S272	NetworKIN	0.218637		IKBKB	SQSTM1	S272	NetworKIN	0.515269
		IKBKB	SQSTM1	S275	NetworKIN	-0.350336		IKBKB	SQSTM1	S275	NetworKIN	-0.0351099		IKBKB	SQSTM1	S275	NetworKIN	0.338131		IKBKB	SQSTM1	S275	NetworKIN	0.0749271
		IKBKB	SQSTM1	S276	NetworKIN	-0.545251		IKBKB	SQSTM1	S276	NetworKIN	0.146127		IKBKB	SQSTM1	S276	NetworKIN	0.458734		IKBKB	SQSTM1	S276	NetworKIN	0.25006
		IKBKB	SQSTM1	S277	NetworKIN	-0.431583		IKBKB	SQSTM1	S277	NetworKIN	-0.325884		IKBKB	SQSTM1	S277	NetworKIN	0.855287		IKBKB	SQSTM1	S277	NetworKIN	-0.151042
		IKBKB	FOXO1	S287	NetworKIN	-0.491937		IKBKB	FOXO1	S287	NetworKIN	0.173654		IKBKB	FOXO1	S287	NetworKIN	0.225351		IKBKB	FOXO1	S287	NetworKIN	-0.0751309
		IKBKB	IRS1	S3	NetworKIN	-0.20939		IKBKB	IRS1	S3	NetworKIN	-0.130666		IKBKB	IRS1	S3	NetworKIN	-0.0778996		IKBKB	IRS1	S3	NetworKIN	0.0320856
		IKBKB	IRS2	S306	NetworKIN	-0.540501		IKBKB	IRS2	S306	NetworKIN	-0.024748		IKBKB	IRS2	S306	NetworKIN	0.333409		IKBKB	IRS2	S306	NetworKIN	0.212404
		IKBKB	IRS1	S307	NetworKIN	-0.0764391		IKBKB	IRS1	S307	NetworKIN	0.104714		IKBKB	IRS1	S307	NetworKIN	0.315593		IKBKB	IRS1	S307	NetworKIN	0.0779247
		IKBKB	PRKCA	S319	NetworKIN	0.305493		IKBKB	PRKCA	S319	NetworKIN	0.672694		IKBKB	PRKCA	S319	NetworKIN	0.100497		IKBKB	PRKCA	S319	NetworKIN	1.36503
		IKBKB	IRS1	S323	NetworKIN	-0.558861		IKBKB	IRS1	S323	NetworKIN	-0.104917		IKBKB	IRS1	S323	NetworKIN	0.297566		IKBKB	IRS1	S323	NetworKIN	0.0827386
		IKBKB	IRS1	S330	NetworKIN	-0.0270253		IKBKB	IRS1	S330	NetworKIN	0.221561		IKBKB	IRS1	S330	NetworKIN	-0.141524		IKBKB	IRS1	S330	NetworKIN	0.330103
		IKBKB	SQSTM1	S332	NetworKIN	-0.380297		IKBKB	SQSTM1	S332	NetworKIN	0.0682189		IKBKB	SQSTM1	S332	NetworKIN	0.172952		IKBKB	SQSTM1	S332	NetworKIN	0.0141704
		IKBKB	IRS1	S337	NetworKIN	-0.0672215		IKBKB	IRS1	S337	NetworKIN	-0.317853		IKBKB	IRS1	S337	NetworKIN	-0.125926		IKBKB	IRS1	S337	NetworKIN	-0.127212
		IKBKB	PRKCE	S337	NetworKIN	-0.40447		IKBKB	PRKCE	S337	NetworKIN	0.774299		IKBKB	PRKCE	S337	NetworKIN	0.0879153		IKBKB	PRKCE	S337	NetworKIN	0.0835642
		IKBKB	IRS1	S341	NetworKIN	-0.0864353		IKBKB	IRS1	S341	NetworKIN	-0.287902		IKBKB	IRS1	S341	NetworKIN	0.111322		IKBKB	IRS1	S341	NetworKIN	-0.0952166
		IKBKB	IRS1	S348	NetworKIN	-0.186318		IKBKB	IRS1	S348	NetworKIN	-0.0961616		IKBKB	IRS1	S348	NetworKIN	0.101395		IKBKB	IRS1	S348	NetworKIN	-0.0400865
		IKBKB	SQSTM1	S361	NetworKIN	-0.526525		IKBKB	SQSTM1	S361	NetworKIN	0.453454		IKBKB	SQSTM1	S361	NetworKIN	0.223644		IKBKB	SQSTM1	S361	NetworKIN	0.0207315
		IKBKB	SQSTM1	S365	NetworKIN	-0.775327		IKBKB	SQSTM1	S365	NetworKIN	0.584134		IKBKB	SQSTM1	S365	NetworKIN	0.53987		IKBKB	SQSTM1	S365	NetworKIN	0.138333
		IKBKB	SQSTM1	S366	NetworKIN	-0.777656		IKBKB	SQSTM1	S366	NetworKIN	0.30809		IKBKB	SQSTM1	S366	NetworKIN	0.292273		IKBKB	SQSTM1	S366	NetworKIN	-0.168316
		IKBKB	PRKCE	S368	NetworKIN	0.326971		IKBKB	PRKCE	S368	NetworKIN	1.48311		IKBKB	PRKCE	S368	NetworKIN	0.640517		IKBKB	PRKCE	S368	NetworKIN	0.191239
		IKBKB	IRS1	S374	NetworKIN	0.0376267		IKBKB	IRS1	S374	NetworKIN	0.213023		IKBKB	IRS1	S374	NetworKIN	0.018038		IKBKB	IRS1	S374	NetworKIN	0.0274635
		IKBKB	FOXO3	S425	NetworKIN	0.0562367		IKBKB	FOXO3	S425	NetworKIN	0.370337		IKBKB	FOXO3	S425	NetworKIN	-0.0204672		IKBKB	FOXO3	S425	NetworKIN	0.683467
		IKBKB	FOXO1	S470	NetworKIN	-0.422833		IKBKB	FOXO1	S470	NetworKIN	0.488398		IKBKB	FOXO1	S470	NetworKIN	0.242123		IKBKB	FOXO1	S470	NetworKIN	0.030756
		IKBKB	AKT2	S474	NetworKIN	-0.218463		IKBKB	AKT2	S474	NetworKIN	-0.0712267		IKBKB	AKT2	S474	NetworKIN	0.148073		IKBKB	AKT2	S474	NetworKIN	0.0791953
		IKBKB	IRS1	S527	NetworKIN	-0.352686		IKBKB	IRS1	S527	NetworKIN	-0.281124		IKBKB	IRS1	S527	NetworKIN	0.150522		IKBKB	IRS1	S527	NetworKIN	0.123649
		IKBKB	IRS1	S531	NetworKIN	-0.506915		IKBKB	IRS1	S531	NetworKIN	-0.328371		IKBKB	IRS1	S531	NetworKIN	0.200626		IKBKB	IRS1	S531	NetworKIN	-0.0269413
		IKBKB	CTNNB1	S552	NetworKIN	0.0103464		IKBKB	CTNNB1	S552	NetworKIN	0.228096		IKBKB	CTNNB1	S552	NetworKIN	0.158061		IKBKB	CTNNB1	S552	NetworKIN	0.0525474
		IKBKB	IRS2	S560	NetworKIN	-0.170712		IKBKB	IRS2	S560	NetworKIN	0.162723		IKBKB	IRS2	S560	NetworKIN	0.0504492		IKBKB	IRS2	S560	NetworKIN	0.277245
		IKBKB	HSPB1	S65	NetworKIN	-0.282196		IKBKB	HSPB1	S65	NetworKIN	1.19051		IKBKB	HSPB1	S65	NetworKIN	0.130473		IKBKB	HSPB1	S65	NetworKIN	0.87668
		IKBKB	PRKCE	S729	NetworKIN	0.115593		IKBKB	PRKCE	S729	NetworKIN	0.169051		IKBKB	PRKCE	S729	NetworKIN	0.63326		IKBKB	PRKCE	S729	NetworKIN	0.0836982
		IKBKB	JUN	S73	NetworKIN	0.571589		IKBKB	JUN	S73	NetworKIN	0.577378		IKBKB	JUN	S73	NetworKIN	0.174698		IKBKB	JUN	S73	NetworKIN	0.828948
		IKBKB	HSPB1	S82	NetworKIN	0.883518		IKBKB	HSPB1	S82	NetworKIN	1.25016		IKBKB	HSPB1	S82	NetworKIN	-0.267891		IKBKB	HSPB1	S82	NetworKIN	1.14434
		IKBKB	HSPB1	S83	NetworKIN	1.07049		IKBKB	HSPB1	S83	NetworKIN	1.08315		IKBKB	HSPB1	S83	NetworKIN	-0.481017		IKBKB	HSPB1	S83	NetworKIN	0.912212
		IKBKB	HSPB1	S86	NetworKIN	0.596729		IKBKB	HSPB1	S86	NetworKIN	0.813461		IKBKB	HSPB1	S86	NetworKIN	-0.046395		IKBKB	HSPB1	S86	NetworKIN	0.578559
		IKBKB	TSC2	S939	NetworKIN	-0.179627		IKBKB	TSC2	S939	NetworKIN	-0.197138		IKBKB	TSC2	S939	NetworKIN	-0.00135892		IKBKB	TSC2	S939	NetworKIN	-0.0365394
		IKBKB	HSPB1	S98	NetworKIN	-0.418407		IKBKB	HSPB1	S98	NetworKIN	0.301862		IKBKB	HSPB1	S98	NetworKIN	0.199557		IKBKB	HSPB1	S98	NetworKIN	0.152832
		INSR	CAV1	Y14	NetworKIN	-0.184943		INSR	CAV1	Y14	NetworKIN	-0.0917786		INSR	CAV1	Y14	NetworKIN	-0.0999114		INSR	CAV1	Y14	NetworKIN	-0.231833
		INSR	MAPK1	Y187	NetworKIN	0.571604		INSR	MAPK1	Y187	NetworKIN	0.387487		INSR	MAPK1	Y187	NetworKIN	0.0231633		INSR	MAPK1	Y187	NetworKIN	-0.245997
		INSR	IRS1	Y612	NetworKIN	-0.364037		INSR	IRS1	Y612	NetworKIN	0.109707		INSR	IRS1	Y612	NetworKIN	0.143815		INSR	IRS1	Y612	NetworKIN	-0.120175
		INSR	STAT5B	Y699	NetworKIN	2.4341		INSR	STAT5B	Y699	NetworKIN	0.320074		INSR	STAT5B	Y699	NetworKIN	-0.40952		INSR	STAT5B	Y699	NetworKIN	-0.192927
		KDR	PXN	Y118	NetworKIN	-0.0266025		KDR	PXN	Y118	NetworKIN	0.140056		KDR	PXN	Y118	NetworKIN	0.194056		KDR	PXN	Y118	NetworKIN	-0.160185
		KDR	CAV1	Y14	NetworKIN	-0.184943		KDR	CAV1	Y14	NetworKIN	-0.0917786		KDR	CAV1	Y14	NetworKIN	-0.0999114		KDR	CAV1	Y14	NetworKIN	-0.231833
		KIT	NPM1	Y67	NetworKIN	-0.178501		KIT	NPM1	Y67	NetworKIN	0.071562		KIT	NPM1	Y67	NetworKIN	0.376511		KIT	NPM1	Y67	NetworKIN	-0.228698
		LCK	MAPK1	Y187	NetworKIN	0.571604		LCK	MAPK1	Y187	NetworKIN	0.387487		LCK	MAPK1	Y187	NetworKIN	0.0231633		LCK	MAPK1	Y187	NetworKIN	-0.245997
		MAK	VIM	S25	NetworKIN	-0.346223		MAK	VIM	S25	NetworKIN	0.452175		MAK	VIM	S25	NetworKIN	0.404373		MAK	VIM	S25	NetworKIN	0.0636407
		MAK	VIM	S39	NetworKIN	-0.196733		MAK	VIM	S39	NetworKIN	0.750871		MAK	VIM	S39	NetworKIN	0.182388		MAK	VIM	S39	NetworKIN	-0.0635193
		MAK	VIM	S419	NetworKIN	-0.449961		MAK	VIM	S419	NetworKIN	0.117757		MAK	VIM	S419	NetworKIN	0.100985		MAK	VIM	S419	NetworKIN	-0.076825
		MAK	VIM	S430	NetworKIN	-0.874795		MAK	VIM	S430	NetworKIN	0.117371		MAK	VIM	S430	NetworKIN	0.145652		MAK	VIM	S430	NetworKIN	-0.0101115
		MAK	VIM	S47	NetworKIN	-0.452957		MAK	VIM	S47	NetworKIN	0.356683		MAK	VIM	S47	NetworKIN	0.169109		MAK	VIM	S47	NetworKIN	-0.132172
		MAK	VIM	S5	NetworKIN	-0.855256		MAK	VIM	S5	NetworKIN	0.380469		MAK	VIM	S5	NetworKIN	0.163493		MAK	VIM	S5	NetworKIN	0.685498
		MAK	VIM	S55	NetworKIN	-0.609567		MAK	VIM	S55	NetworKIN	-0.0873968		MAK	VIM	S55	NetworKIN	0.405851		MAK	VIM	S55	NetworKIN	0.380735
		MAK	VIM	S56	NetworKIN	-0.0477292		MAK	VIM	S56	NetworKIN	0.689617		MAK	VIM	S56	NetworKIN	0.312762		MAK	VIM	S56	NetworKIN	0.198222
		MAK	VIM	S72	NetworKIN	-0.772996		MAK	VIM	S72	NetworKIN	0.257668		MAK	VIM	S72	NetworKIN	-0.10468		MAK	VIM	S72	NetworKIN	0.294279
		MAK	VIM	S73	NetworKIN	-0.289426		MAK	VIM	S73	NetworKIN	0.680208		MAK	VIM	S73	NetworKIN	0.0554694		MAK	VIM	S73	NetworKIN	0.188656
		MAK	VIM	T48	NetworKIN	-0.384247		MAK	VIM	T48	NetworKIN	0.645736		MAK	VIM	T48	NetworKIN	0.147022		MAK	VIM	T48	NetworKIN	0.173799
		MAP2K1	PXN	S106	NetworKIN	0.482801		MAP2K1	PXN	S106	NetworKIN	0.549764		MAP2K1	PXN	S106	NetworKIN	0.162662		MAP2K1	PXN	S106	NetworKIN	0.628238
		MAP2K1	SOS1	S1082	NetworKIN	0.0140934		MAP2K1	SOS1	S1082	NetworKIN	0.381437		MAP2K1	SOS1	S1082	NetworKIN	0.0260501		MAP2K1	SOS1	S1082	NetworKIN	0.112974
		MAP2K1	EGFR	S1166	NetworKIN	-0.742695		MAP2K1	EGFR	S1166	NetworKIN	0.181343		MAP2K1	EGFR	S1166	NetworKIN	0.0455547		MAP2K1	EGFR	S1166	NetworKIN	-0.0388756
		MAP2K1	MTOR	S1261	NetworKIN	0.846938		MAP2K1	MTOR	S1261	NetworKIN	0.611645		MAP2K1	MTOR	S1261	NetworKIN	0.184585		MAP2K1	MTOR	S1261	NetworKIN	-0.263957
		MAP2K1	PAK2	S141	NetworKIN	-0.317153		MAP2K1	PAK2	S141	NetworKIN	0.256888		MAP2K1	PAK2	S141	NetworKIN	0.156132		MAP2K1	PAK2	S141	NetworKIN	0.0147804
		MAP2K1	MBP	S153	NetworKIN	-0.193926		MAP2K1	MBP	S153	NetworKIN	0.423331		MAP2K1	MBP	S153	NetworKIN	-0.278024		MAP2K1	MBP	S153	NetworKIN	-0.11852
		MAP2K1	ARAF	S157	NetworKIN	0.00373955		MAP2K1	ARAF	S157	NetworKIN	-0.170938		MAP2K1	ARAF	S157	NetworKIN	0.0555277		MAP2K1	ARAF	S157	NetworKIN	0.0575498
		MAP2K1	ARAF	S186	NetworKIN	-0.0510334		MAP2K1	ARAF	S186	NetworKIN	0.315746		MAP2K1	ARAF	S186	NetworKIN	0.048951		MAP2K1	ARAF	S186	NetworKIN	0.60593
		MAP2K1	PAK2	S19	NetworKIN	-0.293508		MAP2K1	PAK2	S19	NetworKIN	0.688352		MAP2K1	PAK2	S19	NetworKIN	0.108106		MAP2K1	PAK2	S19	NetworKIN	-0.127251
		MAP2K1	PAK2	S197	NetworKIN	-0.600183		MAP2K1	PAK2	S197	NetworKIN	0.000872719		MAP2K1	PAK2	S197	NetworKIN	0.233248		MAP2K1	PAK2	S197	NetworKIN	-0.140304
		MAP2K1	MAPK14	S2	NetworKIN	-0.121063		MAP2K1	MAPK14	S2	NetworKIN	-0.329715		MAP2K1	MAPK14	S2	NetworKIN	-0.225855		MAP2K1	MAPK14	S2	NetworKIN	-0.339047
		MAP2K1	PAK2	S2	NetworKIN	-0.303244		MAP2K1	PAK2	S2	NetworKIN	0.0574775		MAP2K1	PAK2	S2	NetworKIN	0.144188		MAP2K1	PAK2	S2	NetworKIN	-0.296711
		MAP2K1	PAK2	S20	NetworKIN	-0.477815		MAP2K1	PAK2	S20	NetworKIN	0.273671		MAP2K1	PAK2	S20	NetworKIN	0.091791		MAP2K1	PAK2	S20	NetworKIN	-0.170021
		MAP2K1	MBP	S205	NetworKIN	-0.47847		MAP2K1	MBP	S205	NetworKIN	0.322056		MAP2K1	MBP	S205	NetworKIN	0.200129		MAP2K1	MBP	S205	NetworKIN	0.221698
		MAP2K1	YWHAZ	S207	NetworKIN	-0.494625		MAP2K1	YWHAZ	S207	NetworKIN	0.570137		MAP2K1	YWHAZ	S207	NetworKIN	0.665094		MAP2K1	YWHAZ	S207	NetworKIN	0.242573
		MAP2K1	ARAF	S214	NetworKIN	0.00338245		MAP2K1	ARAF	S214	NetworKIN	0.12485		MAP2K1	ARAF	S214	NetworKIN	0.165682		MAP2K1	ARAF	S214	NetworKIN	0.0676598
		MAP2K1	RAF1	S233	NetworKIN	-0.0872978		MAP2K1	RAF1	S233	NetworKIN	0.403251		MAP2K1	RAF1	S233	NetworKIN	0.6079		MAP2K1	RAF1	S233	NetworKIN	-0.294329
		MAP2K1	MTOR	S2481	NetworKIN	-0.168194		MAP2K1	MTOR	S2481	NetworKIN	0.40866		MAP2K1	MTOR	S2481	NetworKIN	0.62331		MAP2K1	MTOR	S2481	NetworKIN	0.16587
		MAP2K1	ARAF	S257	NetworKIN	-0.649631		MAP2K1	ARAF	S257	NetworKIN	-0.444648		MAP2K1	ARAF	S257	NetworKIN	0.344117		MAP2K1	ARAF	S257	NetworKIN	-0.0566116
		MAP2K1	RAF1	S259	NetworKIN	-0.209507		MAP2K1	RAF1	S259	NetworKIN	0.134276		MAP2K1	RAF1	S259	NetworKIN	0.0495004		MAP2K1	RAF1	S259	NetworKIN	0.0638142
		MAP2K1	IRS1	S307	NetworKIN	-0.0764391		MAP2K1	IRS1	S307	NetworKIN	0.104714		MAP2K1	IRS1	S307	NetworKIN	0.315593		MAP2K1	IRS1	S307	NetworKIN	0.0779247
		MAP2K1	IRS1	S330	NetworKIN	-0.0270253		MAP2K1	IRS1	S330	NetworKIN	0.221561		MAP2K1	IRS1	S330	NetworKIN	-0.141524		MAP2K1	IRS1	S330	NetworKIN	0.330103
		MAP2K1	IRS1	S337	NetworKIN	-0.0672215		MAP2K1	IRS1	S337	NetworKIN	-0.317853		MAP2K1	IRS1	S337	NetworKIN	-0.125926		MAP2K1	IRS1	S337	NetworKIN	-0.127212
		MAP2K1	IRS1	S341	NetworKIN	-0.0864353		MAP2K1	IRS1	S341	NetworKIN	-0.287902		MAP2K1	IRS1	S341	NetworKIN	0.111322		MAP2K1	IRS1	S341	NetworKIN	-0.0952166
		MAP2K1	BRAF	S365	NetworKIN	-0.268018		MAP2K1	BRAF	S365	NetworKIN	0.283472		MAP2K1	BRAF	S365	NetworKIN	0.171114		MAP2K1	BRAF	S365	NetworKIN	0.0967049
		MAP2K1	PEBP1	S52	NetworKIN	-0.213757		MAP2K1	PEBP1	S52	NetworKIN	0.322299		MAP2K1	PEBP1	S52	NetworKIN	0.489625		MAP2K1	PEBP1	S52	NetworKIN	0.165104
		MAP2K1	IRS1	S527	NetworKIN	-0.352686		MAP2K1	IRS1	S527	NetworKIN	-0.281124		MAP2K1	IRS1	S527	NetworKIN	0.150522		MAP2K1	IRS1	S527	NetworKIN	0.123649
		MAP2K1	PAK2	S58	NetworKIN	-0.160726		MAP2K1	PAK2	S58	NetworKIN	1.7767		MAP2K1	PAK2	S58	NetworKIN	0.210934		MAP2K1	PAK2	S58	NetworKIN	0.193328
		MAP2K1	BRAF	S729	NetworKIN	-0.157515		MAP2K1	BRAF	S729	NetworKIN	-0.0881678		MAP2K1	BRAF	S729	NetworKIN	-0.0611345		MAP2K1	BRAF	S729	NetworKIN	-0.334362
		MAP2K1	JUN	S73	NetworKIN	0.571589		MAP2K1	JUN	S73	NetworKIN	0.577378		MAP2K1	JUN	S73	NetworKIN	0.174698		MAP2K1	JUN	S73	NetworKIN	0.828948
		MAP2K1	PRKAR2A	S78	NetworKIN	-0.334124		MAP2K1	PRKAR2A	S78	NetworKIN	0.163518		MAP2K1	PRKAR2A	S78	NetworKIN	0.130566		MAP2K1	PRKAR2A	S78	NetworKIN	0.0710053
		MAP2K1	MAP2K4	S80	NetworKIN	0.0993864		MAP2K1	MAP2K4	S80	NetworKIN	1.3882		MAP2K1	MAP2K4	S80	NetworKIN	0.226514		MAP2K1	MAP2K4	S80	NetworKIN	0.180813
		MAP2K1	PXN	S83	NetworKIN	-0.276617		MAP2K1	PXN	S83	NetworKIN	0.425102		MAP2K1	PXN	S83	NetworKIN	0.176491		MAP2K1	PXN	S83	NetworKIN	0.0728466
		MAP2K1	PXN	S85	NetworKIN	-0.250337		MAP2K1	PXN	S85	NetworKIN	0.354932		MAP2K1	PXN	S85	NetworKIN	0.234233		MAP2K1	PXN	S85	NetworKIN	0.164829
		MAP2K1	PRKAR2A	T104	NetworKIN	-0.076431		MAP2K1	PRKAR2A	T104	NetworKIN	-0.196348		MAP2K1	PRKAR2A	T104	NetworKIN	0.0190854		MAP2K1	PRKAR2A	T104	NetworKIN	-0.0991012
		MAP2K1	PXN	T132	NetworKIN	0.274383		MAP2K1	PXN	T132	NetworKIN	0.0720247		MAP2K1	PXN	T132	NetworKIN	0.165727		MAP2K1	PXN	T132	NetworKIN	0.36934
		MAP2K1	PAK2	T143	NetworKIN	-0.255329		MAP2K1	PAK2	T143	NetworKIN	0.258572		MAP2K1	PAK2	T143	NetworKIN	-0.0330861		MAP2K1	PAK2	T143	NetworKIN	-0.103647
		MAP2K1	PAK2	T169	NetworKIN	-0.155907		MAP2K1	PAK2	T169	NetworKIN	-0.0423419		MAP2K1	PAK2	T169	NetworKIN	0.134837		MAP2K1	PAK2	T169	NetworKIN	-0.120414
		MAP2K1	ARAF	T181	NetworKIN	-0.26486		MAP2K1	ARAF	T181	NetworKIN	0.649239		MAP2K1	ARAF	T181	NetworKIN	-0.0173303		MAP2K1	ARAF	T181	NetworKIN	0.248859
		MAP2K1	MAPK1	T190	NetworKIN	-0.183651		MAP2K1	MAPK1	T190	NetworKIN	0.217473		MAP2K1	MAPK1	T190	NetworKIN	0.0605159		MAP2K1	MAPK1	T190	NetworKIN	0.123523
		MAP2K1	RAF1	T260	NetworKIN	0.00781058		MAP2K1	RAF1	T260	NetworKIN	0.233051		MAP2K1	RAF1	T260	NetworKIN	0.0237345		MAP2K1	RAF1	T260	NetworKIN	0.105397
		MAP2K1	HSPA8	T341	NetworKIN	-0.0942683		MAP2K1	HSPA8	T341	NetworKIN	-0.197905		MAP2K1	HSPA8	T341	NetworKIN	0.036287		MAP2K1	HSPA8	T341	NetworKIN	-0.0213783
		MAP2K1	EIF4EBP1	T36	NetworKIN	-1.22295		MAP2K1	EIF4EBP1	T36	NetworKIN	-0.591305		MAP2K1	EIF4EBP1	T36	NetworKIN	0.202765		MAP2K1	EIF4EBP1	T36	NetworKIN	0.055227
		MAP2K1	EIF4EBP1	T46	NetworKIN	-0.936129		MAP2K1	EIF4EBP1	T46	NetworKIN	-0.391568		MAP2K1	EIF4EBP1	T46	NetworKIN	0.105494		MAP2K1	EIF4EBP1	T46	NetworKIN	0.125691
		MAP2K1	IRS1	T530	NetworKIN	-0.60952		MAP2K1	IRS1	T530	NetworKIN	-0.248466		MAP2K1	IRS1	T530	NetworKIN	0.346346		MAP2K1	IRS1	T530	NetworKIN	0.0823952
		MAP2K1	EIF4EBP1	T70	NetworKIN	-0.588		MAP2K1	EIF4EBP1	T70	NetworKIN	-0.17976		MAP2K1	EIF4EBP1	T70	NetworKIN	0.14685		MAP2K1	EIF4EBP1	T70	NetworKIN	-0.177883
		MAP2K1	HSPA8	Y134	NetworKIN	-0.112658		MAP2K1	HSPA8	Y134	NetworKIN	-0.328795		MAP2K1	HSPA8	Y134	NetworKIN	-0.0154791		MAP2K1	HSPA8	Y134	NetworKIN	-0.140692
		MAP2K1	HSPA8	Y15	NetworKIN	-0.0236078		MAP2K1	HSPA8	Y15	NetworKIN	-0.167458		MAP2K1	HSPA8	Y15	NetworKIN	-0.0159687		MAP2K1	HSPA8	Y15	NetworKIN	0.127846
		MAP2K1	PEBP1	Y181	NetworKIN	-0.192132		MAP2K1	PEBP1	Y181	NetworKIN	0.29873		MAP2K1	PEBP1	Y181	NetworKIN	0.448333		MAP2K1	PEBP1	Y181	NetworKIN	0.258933
		MAP2K1	EIF4EBP1	Y34	NetworKIN	-0.954312		MAP2K1	EIF4EBP1	Y34	NetworKIN	-0.383866		MAP2K1	EIF4EBP1	Y34	NetworKIN	0.110614		MAP2K1	EIF4EBP1	Y34	NetworKIN	0.126557
		MAP2K1	IRS1	Y612	NetworKIN	-0.364037		MAP2K1	IRS1	Y612	NetworKIN	0.109707		MAP2K1	IRS1	Y612	NetworKIN	0.143815		MAP2K1	IRS1	Y612	NetworKIN	-0.120175
		MAP2K2	ARAF	S157	NetworKIN	0.00373955		MAP2K2	ARAF	S157	NetworKIN	-0.170938		MAP2K2	ARAF	S157	NetworKIN	0.0555277		MAP2K2	ARAF	S157	NetworKIN	0.0575498
		MAP2K2	MAP2K2	S23	NetworKIN	-0.220085		MAP2K2	MAP2K2	S23	NetworKIN	0.941257		MAP2K2	MAP2K2	S23	NetworKIN	-0.228346		MAP2K2	MAP2K2	S23	NetworKIN	1.23413
		MAP2K2	RAF1	S233	NetworKIN	-0.0872978		MAP2K2	RAF1	S233	NetworKIN	0.403251		MAP2K2	RAF1	S233	NetworKIN	0.6079		MAP2K2	RAF1	S233	NetworKIN	-0.294329
		MAP2K2	RAF1	S259	NetworKIN	-0.209507		MAP2K2	RAF1	S259	NetworKIN	0.134276		MAP2K2	RAF1	S259	NetworKIN	0.0495004		MAP2K2	RAF1	S259	NetworKIN	0.0638142
		MAP2K2	MAP2K2	S295	NetworKIN	0.32474		MAP2K2	MAP2K2	S295	NetworKIN	0.12501		MAP2K2	MAP2K2	S295	NetworKIN	0.000823958		MAP2K2	MAP2K2	S295	NetworKIN	0.738015
		MAP2K2	BRAF	S365	NetworKIN	-0.268018		MAP2K2	BRAF	S365	NetworKIN	0.283472		MAP2K2	BRAF	S365	NetworKIN	0.171114		MAP2K2	BRAF	S365	NetworKIN	0.0967049
		MAP2K2	CTNNB1	S552	NetworKIN	0.0103464		MAP2K2	CTNNB1	S552	NetworKIN	0.228096		MAP2K2	CTNNB1	S552	NetworKIN	0.158061		MAP2K2	CTNNB1	S552	NetworKIN	0.0525474
		MAP2K2	BRAF	S729	NetworKIN	-0.157515		MAP2K2	BRAF	S729	NetworKIN	-0.0881678		MAP2K2	BRAF	S729	NetworKIN	-0.0611345		MAP2K2	BRAF	S729	NetworKIN	-0.334362
		MAP2K2	JUN	S73	NetworKIN	0.571589		MAP2K2	JUN	S73	NetworKIN	0.577378		MAP2K2	JUN	S73	NetworKIN	0.174698		MAP2K2	JUN	S73	NetworKIN	0.828948
		MAP2K2	ARAF	T181	NetworKIN	-0.26486		MAP2K2	ARAF	T181	NetworKIN	0.649239		MAP2K2	ARAF	T181	NetworKIN	-0.0173303		MAP2K2	ARAF	T181	NetworKIN	0.248859
		MAP2K2	MAPK1	T185	NetworKIN	0.577583		MAP2K2	MAPK1	T185	NetworKIN	0.291315		MAP2K2	MAPK1	T185	NetworKIN	0.0295839		MAP2K2	MAPK1	T185	NetworKIN	-0.341029
		MAP2K2	MAPK1	T190	NetworKIN	-0.183651		MAP2K2	MAPK1	T190	NetworKIN	0.217473		MAP2K2	MAPK1	T190	NetworKIN	0.0605159		MAP2K2	MAPK1	T190	NetworKIN	0.123523
		MAP2K2	RAF1	T260	NetworKIN	0.00781058		MAP2K2	RAF1	T260	NetworKIN	0.233051		MAP2K2	RAF1	T260	NetworKIN	0.0237345		MAP2K2	RAF1	T260	NetworKIN	0.105397
		MAP2K2	MAP2K2	T394	NetworKIN	0.212257		MAP2K2	MAP2K2	T394	NetworKIN	0.232654		MAP2K2	MAP2K2	T394	NetworKIN	-0.0116724		MAP2K2	MAP2K2	T394	NetworKIN	0.246421
		MAP2K2	CTNNB1	T551	NetworKIN	0.0248789		MAP2K2	CTNNB1	T551	NetworKIN	0.415619		MAP2K2	CTNNB1	T551	NetworKIN	0.105122		MAP2K2	CTNNB1	T551	NetworKIN	-0.0124792
		MAP2K2	MAPK1	Y187	NetworKIN	0.571604		MAP2K2	MAPK1	Y187	NetworKIN	0.387487		MAP2K2	MAPK1	Y187	NetworKIN	0.0231633		MAP2K2	MAPK1	Y187	NetworKIN	-0.245997
		MAP2K3	HSPB1	S15	NetworKIN	1.34119		MAP2K3	HSPB1	S15	NetworKIN	1.87711		MAP2K3	HSPB1	S15	NetworKIN	-0.573784		MAP2K3	HSPB1	S15	NetworKIN	1.55372
		MAP2K3	HSPB1	S199	NetworKIN	-0.567885		MAP2K3	HSPB1	S199	NetworKIN	0.101556		MAP2K3	HSPB1	S199	NetworKIN	0.201722		MAP2K3	HSPB1	S199	NetworKIN	0.380848
		MAP2K3	MAPK14	S2	NetworKIN	-0.121063		MAP2K3	MAPK14	S2	NetworKIN	-0.329715		MAP2K3	MAPK14	S2	NetworKIN	-0.225855		MAP2K3	MAPK14	S2	NetworKIN	-0.339047
		MAP2K3	TAOK3	S324	NetworKIN	-0.231611		MAP2K3	TAOK3	S324	NetworKIN	0.415671		MAP2K3	TAOK3	S324	NetworKIN	0.090306		MAP2K3	TAOK3	S324	NetworKIN	-0.013295
		MAP2K3	SLC2A4	S488	NetworKIN	-0.216969		MAP2K3	SLC2A4	S488	NetworKIN	0.252813		MAP2K3	SLC2A4	S488	NetworKIN	0.114474		MAP2K3	SLC2A4	S488	NetworKIN	0.033741
		MAP2K3	JUN	S73	NetworKIN	0.571589		MAP2K3	JUN	S73	NetworKIN	0.577378		MAP2K3	JUN	S73	NetworKIN	0.174698		MAP2K3	JUN	S73	NetworKIN	0.828948
		MAP2K3	HSPB1	S82	NetworKIN	0.883518		MAP2K3	HSPB1	S82	NetworKIN	1.25016		MAP2K3	HSPB1	S82	NetworKIN	-0.267891		MAP2K3	HSPB1	S82	NetworKIN	1.14434
		MAP2K3	HSPB1	S83	NetworKIN	1.07049		MAP2K3	HSPB1	S83	NetworKIN	1.08315		MAP2K3	HSPB1	S83	NetworKIN	-0.481017		MAP2K3	HSPB1	S83	NetworKIN	0.912212
		MAP2K3	CAMK2B	T254	NetworKIN	-0.879206		MAP2K3	CAMK2B	T254	NetworKIN	-0.074599		MAP2K3	CAMK2B	T254	NetworKIN	0.366121		MAP2K3	CAMK2B	T254	NetworKIN	-0.319747
[truncated: 3,115 more rows]
