# Supplementary material for: Identification of a Resistance Exercise-Specific Signaling Pathway that Drives Skeletal Muscle Growth
Source: Research Square preprint supplement (doi:10.21203/rs.3.rs-4997138/v1), 2024-11-12
Supplement: Supplementary file 10 [file df563ca12e36cf4a12b5cf0c.xlsx]

## Sheet: Supplementary Table 8
mS - mean log2(fold change) vs. pre-exercise of all the kinase's substrates	Current Study						Blazev et al. 2022
m - total # of substrates	Kinase.Gene	mS	m	z.score	FDR		Kinase.Gene	mS	m	z.score	FDR
z.score - normalized score for each kinase	MAPK3	0.230738	600	8.21564	2.51e-14		DMPK	0.466529	21	6.32476	2.73911e-08
FDR - P-value adjusted for multiple hypothesis testing using the Benjamini & Hochberg method	MAPKAPK3	0.816713	11	6.75024	8.78e-10		MAPKAPK5	0.790417	8	6.16949	3.69946e-08
	MAPK1	0.243851	319	6.66985	1.02e-09		MAPKAPK3	0.713103	9	5.97008	8.537e-08
	MAPKAPK5	0.641404	15	5.91294	8e-08		MAPKAPK2	0.928558	5	5.64139	4.55433e-07
	DMPK	0.439327	28	4.97668	1.28e-05		MAPK14	0.39048	18	5.05759	9.17095e-06
	MAP2K4	0.358377	44	4.68091	4.86e-05		MAP2K3	0.274691	18	3.84258	0.00194903
	MAPK8	0.310566	56	4.24286	0.000328271		MAP2K4	0.261948	19	3.81051	0.00194903
	CDK5	0.278419	78	4.18379	0.000379066		MAP2K6	0.184485	31	3.80056	0.00194903
	MAPK9	0.423656	20	4.00275	0.000745051		CHUK	0.110081	55	3.69756	0.0026122
	MARK3	0.406621	19	3.68599	0.00246452		IKBKB	0.0959024	61	3.62013	0.00318012
	CDK2	0.228596	118	3.5759	0.00346112		CSNK2A1	-0.203279	168	-3.58324	0.00333192
	MAPK12	0.34685	27	3.49303	0.00433137		PRKG1	0.119689	37	3.17727	0.0123508
	MARK1	0.364945	23	3.47567	0.00433137		ARAF	0.136256	26	2.87236	0.030965
	MAPK10	0.410931	16	3.43252	0.0047442		MAPK1	-0.0150504	228	2.85522	0.030965
	RIPK3	1.15369	1	3.01283	0.0192501		RPS6KA3	0.153522	17	2.49868	0.0841424
	CHUK	0.245398	59	2.90292	0.0210709		MAPK3	-0.043231	386	2.3457	0.120652
	LMTK2	-0.896441	1	-2.93447	0.0210709		MAPK12	0.109981	20	2.22861	0.14688
	MAPKAPK2	0.394038	13	2.91733	0.0210709		MAPK8	0.0385754	48	2.22897	0.14688
	NEK3	1.11518	1	2.90111	0.0210709		RPS6KB2	0.164327	12	2.19189	0.153293
	PKD1	0.3122	26	2.9152	0.0210709		PLK1	-0.205741	55	-2.09539	0.178184
	MAPK14	0.304846	27	2.85988	0.0229238		CDK4	0.0901338	20	2.00907	0.194399
	MARK4	0.297541	28	2.80022	0.0264216		CSNK2A2	-0.218086	41	-2.00466	0.194399
	CDK4	0.330458	19	2.72293	0.0308001		PRKD1	0.260016	5	1.94406	0.207553
	MAP2K7	0.336995	18	2.73075	0.0308001		MAPK15	0.65425	1	1.84447	0.227994
	MAP2K6	0.262258	36	2.56103	0.0477664		VRK1	0.65425	1	1.84447	0.227994
	MAP2K3	0.289728	25	2.53263	0.0498961		CAMK2D	-0.229166	28	-1.80164	0.234332
	IKBKB	0.218804	66	2.44356	0.0618088		CSNK1G1	-0.293922	13	-1.80508	0.234332
	RPS6KA3	0.240491	44	2.41247	0.0650191		MAP2K2	0.0891531	16	1.78727	0.234723
	NEK4	0.676721	2	2.30399	0.0841844		AKT1	-0.0268948	100	1.59797	0.3393
	CSNK1D	0.214421	62	2.26824	0.0894979		BCKDK	-0.373103	5	-1.55737	0.3393
	PRKG1	0.216675	54	2.16489	0.113034		CAMK1	-0.240248	18	-1.56081	0.3393
	MAPK13	0.275237	21	2.12856	0.120049		DYRK1A	-0.537918	2	-1.56145	0.3393
	AURKA	0.228265	37	1.99652	0.159938		MAPK9	0.0808271	13	1.53677	0.34435
	GSK3A	0.179353	111	1.96317	0.159938		PRKDC	-0.183915	43	-1.49877	0.361622
	MAP4K4	0.593285	2	1.96169	0.159938		MTOR	-0.240389	16	-1.47295	0.370795
	PRKD1	0.327782	10	1.95087	0.159938		MARK2	-0.502045	2	-1.43597	0.388311
	SRRM1	0.596844	2	1.97629	0.159938		MOK	0.235262	3	1.39982	0.405797
	EEF2K	0.497549	3	1.92154	0.166794		CDK6	-0.253847	11	-1.3317	0.421364
	NEK2	0.197988	60	1.8621	0.186201		EEF2K	-0.402075	3	-1.33045	0.421364
	SGK3	0.396708	5	1.82658	0.196679		NEK2	-0.171325	47	-1.35345	0.421364
	DAPK2	-0.196458	4	-1.80774	0.200168		NME1	-0.640975	1	-1.359	0.421364
	TYK2	0.552082	2	1.79266	0.2021		CHEK2	0.271032	2	1.26806	0.433642
	EPHB2	-0.189486	4	-1.76729	0.208738		CSF1R	-0.605209	1	-1.27054	0.433642
	GRK6	-0.144405	5	-1.68346	0.239512		AURKB	-0.169007	39	-1.1971	0.460066
	MAPK11	0.226699	27	1.68192	0.239512		MAPK10	0.0691116	9	1.19175	0.460066
	CDK7	0.218437	31	1.66875	0.240955		PRKACA	-0.0276675	54	1.16022	0.47435
	CAMK1D	0.340286	6	1.59999	0.271719		PRKCD	-0.153102	56	-1.14008	0.481744
	PRKCQ	0.429646	3	1.58036	0.276917		MAP3K7	-0.414196	2	-1.1287	0.482321
	UHMK1	0.412258	3	1.49299	0.322346		PAK4	-0.175298	29	-1.11606	0.483981
	ATM	-0.00539042	17	-1.44141	0.329388		ROCK1	-0.0420459	80	1.0941	0.493042
	ERBB4	0.617977	1	1.45876	0.329388		RAF1	-0.0441811	84	1.07272	0.49493
	JAK2	-0.237536	2	-1.44678	0.329388		ACTR2	-0.272457	3	-0.775179	0.497021
	PTK6	0.617977	1	1.45876	0.329388		ADRBK1	-0.080523	82	0.245935	0.497021
	MAPK7	0.186663	47	1.42284	0.334892		AKT2	-0.0646356	38	0.409643	0.497021
	DAPK3	-0.0784657	6	-1.37558	0.359021		AKT3	-0.102892	20	-0.125964	0.497021
	PIM3	-0.156663	3	-1.36559	0.359229		ATM	-0.102682	25	-0.138233	0.497021
	CAMK4	0.198896	30	1.33112	0.361667		ATR	-0.226427	8	-0.943859	0.497021
	DAPK1	-0.058855	7	-1.33528	0.361667		AURKA	-0.177755	23	-1.02306	0.497021
	MAP2K1	0.172075	64	1.32179	0.361667		BRAF	-0.0297218	1	0.152805	0.497021
	PRKDC	0.20276	27	1.32107	0.361667		CAMK2A	-0.0893489	223	0.0795925	0.497021
	TBK1	-0.111572	4	-1.31523	0.361667		CAMK2B	-0.0698129	31	0.2987	0.497021
	CSNK1A1	0.170731	65	1.30065	0.365272		CAMK2G	-0.137783	11	-0.379625	0.497021
	PRKCT	0.0556781	56	-1.2904	0.366136		CDC42BPA	-0.0689599	11	0.184927	0.497021
	RET	-0.138917	3	-1.27642	0.36946		CDC42BPB	-0.0506235	8	0.285979	0.497021
	PRKCA	0.078538	140	-1.25564	0.377275		CDK14	-0.0991877	1	-0.0190044	0.497021
	HCK	0.359144	3	1.22612	0.39102		CDK16	-0.0972771	2	-0.0201935	0.497021
	GRK4	-0.12563	3	-1.20966	0.396213		CDK19	-0.260557	1	-0.418116	0.497021
	INSR	-0.0678191	5	-1.18667	0.405909		CDK2	-0.0794931	89	0.280247	0.497021
	PKM	0.519131	1	1.17201	0.40749		CDK3	-0.0714357	5	0.110986	0.497021
	RPS6KB1	0.0506909	39	-1.16721	0.40749		CDK5	-0.0845809	48	0.118628	0.497021
	PAK3	0.230154	12	1.15599	0.409368		CDK7	-0.137699	38	-0.704315	0.497021
	BCKDK	0.270127	6	1.10145	0.412313		CSNK1A1	-0.134947	83	-0.978903	0.497021
	CAMK2B	0.184254	32	1.13451	0.412313		CSNK1D	-0.0814229	79	0.221612	0.497021
	EGFR	-0.0198143	7	-1.03564	0.412313		CSNK1E	-0.142438	17	-0.519403	0.497021
	EPHB3	0.486188	1	1.07644	0.412313		CSNK1G2	-0.13458	9	-0.319618	0.497021
	GRK5	0.00466744	11	-1.0627	0.412313		CSNK1G3	-0.141786	5	-0.278083	0.497021
	HIPK2	0.158352	71	1.05675	0.412313		DAPK2	-0.153803	2	-0.217907	0.497021
	IGF1R	-0.0592003	4	-1.01138	0.412313		DAPK3	0.0459764	4	0.680057	0.497021
	LCK	-0.0611058	4	-1.02244	0.412313		DYRK2	0.0663391	4	0.780783	0.497021
	MAP4K6	0.508497	1	1.14116	0.412313		EGFR	-0.177288	8	-0.600107	0.497021
	MOK	-0.0929219	3	-1.04532	0.412313		EIF2AK2	-0.0132886	24	0.947702	0.497021
	PDGFRB	-0.247918	1	-1.05315	0.412313		EPHA2	-0.18274	1	-0.225654	0.497021
	PIM2	-0.0991309	3	-1.07652	0.412313		EPHB1	-0.35424	1	-0.649823	0.497021
	PRKD3	0.463834	1	1.0116	0.412313		EPHB2	-0.33645	1	-0.605824	0.497021
	RPS6KA1	0.213314	14	1.06584	0.412313		ERBB2	-0.127388	5	-0.198456	0.497021
	RPS6KA2	0.0746556	75	-1.01657	0.412313		FYN	-0.251338	4	-0.790632	0.497021
	SRC	0.271023	6	1.10782	0.412313		GRK5	-0.111808	7	-0.132867	0.497021
	TRKB	-0.247918	1	-1.05315	0.412313		GRK6	-0.165522	2	-0.258899	0.497021
	CAMK2D	0.171499	37	0.994844	0.415428		GSK3A	-0.0963604	111	-0.12655	0.497021
	ICK	-0.0244919	6	-0.992054	0.415428		GSK3B	-0.126026	122	-0.943092	0.497021
	PKD3	0.284808	4	0.984511	0.415687		HIPK1	-0.199197	5	-0.595589	0.497021
	ARAF	0.172381	33	0.954232	0.426398		ICK	-0.242031	8	-1.05301	0.497021
	DYRK2	-0.0308225	5	-0.946682	0.426398		IGF1R	-0.23863	3	-0.630269	0.497021
	TRPM6	-0.211093	1	-0.946321	0.426398		IKBKE	-0.385093	1	-0.72613	0.497021
	AURKB	0.0704983	48	-0.896813	0.430736		INSR	-0.11212	4	-0.101977	0.497021
	CAMK2A	0.100014	393	-0.868696	0.430736		LATS1	-0.0859856	5	0.0305182	0.497021
	CHEK1	0.033537	12	-0.819835	0.430736		LATS2	0.12332	1	0.531322	0.497021
	CSNK1G1	0.220934	8	0.868213	0.430736		LCK	-0.353487	2	-0.916353	0.497021
	DYRK3	0.401165	1	0.829799	0.430736		LIMK1	-0.230356	2	-0.48567	0.497021
	EPHA2	0.401135	1	0.829712	0.430736		LIMK2	-0.230356	2	-0.48567	0.497021
	LYN	0.401135	1	0.829712	0.430736		MAP2K1	-0.0952753	53	-0.067907	0.497021
	MAP3K7	0.323384	2	0.854414	0.430736		MAP2K5	-0.217797	11	-1.03598	0.497021
	MAP3K8	0.34194	2	0.930541	0.430736		MAP2K7	-0.124104	12	-0.279311	0.497021
	PDPK1	0.215774	8	0.825875	0.430736		MAP3K8	-0.324733	1	-0.576844	0.497021
	ROCK1	0.150618	79	0.91529	0.430736		MAP4K4	0.0175229	3	0.467056	0.497021
	TLK1	0.278171	3	0.81926	0.430736		MAP4K5	0.0782946	1	0.419961	0.497021
	TTK	0.150442	69	0.851164	0.430736		MARK1	-0.189712	5	-0.543137	0.497021
	CHEK2	-0.0740746	2	-0.776177	0.447407		MARK3	-0.00780998	11	0.686539	0.497021
	GSK3B	0.139127	123	0.772383	0.447407		MARK4	-0.0836368	13	0.0701554	0.497021
	YES1	-0.0191979	4	-0.779293	0.447407		MET	-0.285648	4	-0.960348	0.497021
	STK38	0.244839	4	0.752615	0.455509		MYLK	-0.130586	1	-0.0966609	0.497021
	PAK1	0.137338	133	0.743325	0.457285		NEK1	-0.127348	33	-0.509275	0.497021
	LATS1	0.241279	4	0.731957	0.460326		NEK9	0.0508222	1	0.352014	0.497021
	ACTR2	-0.0245344	3	-0.701702	0.467923		NLK	-0.159709	3	-0.292181	0.497021
	AKT2	0.0805816	48	-0.694157	0.467923		OXSR1	-0.270121	2	-0.62476	0.497021
	CSNK1E	0.168745	20	0.695698	0.467923		PAK1	-0.0957543	96	-0.103001	0.497021
	FGR	0.255111	3	0.703394	0.467923		PAK2	-0.0616308	49	0.517193	0.497021
	RPS6KB2	0.174138	16	0.684835	0.469762		PDK1	-0.0570107	63	0.677139	0.497021
	ABL1	0.181755	6	0.473494	0.471773		PDK2	-0.0678312	7	0.154907	0.497021
	ATR	0.0267483	5	-0.573238	0.471773		PIK3CA	-0.367954	1	-0.683741	0.497021
	CAMK1	0.166904	19	0.654805	0.471773		PIM1	-0.272822	4	-0.896903	0.497021
	CAMK2G	0.0734164	14	-0.45266	0.471773		PIM3	-0.150115	3	-0.251083	0.497021
	CDC42BPA	0.0628418	14	-0.56744	0.471773		PKD1	-0.071778	28	0.258161	0.497021
	CDC7	0.029959	4	-0.494091	0.471773		PKM	-0.0547879	2	0.128424	0.497021
	CDK14	0.300037	1	0.536433	0.471773		PKN1	0.104994	1	0.485996	0.497021
	CDK6	0.050842	10	-0.589656	0.471773		PRKAA1	-0.15664	30	-0.882382	0.497021
	CDK9	0.241703	3	0.636026	0.471773		PRKAA2	-0.116101	70	-0.508995	0.497021
	CLK1	0.0899662	69	-0.606125	0.471773		PRKACB	-0.162059	21	-0.799673	0.497021
	CSNK2A1	0.0939283	119	-0.670613	0.471773		PRKCA	-0.0999334	129	-0.236795	0.497021
	CSNK2A2	0.0894831	39	-0.464441	0.471773		PRKCE	-0.106063	61	-0.281231	0.497021
	CSNK2B	-0.109291	1	-0.651002	0.471773		PRKCH	-0.143696	27	-0.670749	0.497021
	EIF2AK2	0.154825	30	0.630883	0.471773		PRKCQ	-0.0657593	3	0.110286	0.497021
	FYN	0.220044	4	0.608755	0.471773		ROCK2	-0.0754371	42	0.25753	0.497021
	GRK7	0.0411035	6	-0.525946	0.471773		RPS6KA1	0.000871956	7	0.604481	0.497021
	IKBKE	0.278261	1	0.473262	0.471773		RPS6KA2	-0.126045	55	-0.633574	0.497021
	KDR	0.305876	1	0.553371	0.471773		RPS6KB1	-0.0542004	28	0.488207	0.497021
	KIT	0.219775	2	0.429351	0.471773		SGK3	0.0782946	1	0.419961	0.497021
	MAP2K5	0.0216155	6	-0.664423	0.471773		SRC	-0.196617	8	-0.735322	0.497021
	MAP3K5	0.250285	2	0.554519	0.471773		SRRM1	-0.35424	1	-0.649823	0.497021
	MAP4K5	0.265078	1	0.43502	0.471773		STK11	-0.132984	13	-0.369901	0.497021
	MARK2	0.225693	2	0.45363	0.471773		STK3	0.0155806	3	0.458735	0.497021
	MTOR	0.0781083	20	-0.480162	0.471773		STK38	-0.111061	4	-0.0967385	0.497021
	NEK1	0.0708985	23	-0.615223	0.471773		STK38L	0.12332	1	0.531322	0.497021
	NLK	0.163282	11	0.463382	0.471773		STK39	-0.299555	1	-0.514572	0.497021
	PDGFRA	0.219775	2	0.429351	0.471773		TAF1	-0.1352	1	-0.108073	0.497021
	PDK1	0.138354	66	0.547566	0.471773		TBK1	-0.102829	1	-0.028011	0.497021
	PDK2	0.162238	16	0.546751	0.471773		TESK1	-0.196674	1	-0.260116	0.497021
	PKD2	0.269173	2	0.632011	0.471773		TGFBR2	-0.0866961	18	0.0504493	0.497021
	PRKACB	0.0821732	30	-0.523489	0.471773		TLK1	0.159504	1	0.620816	0.497021
	PRKCB	0.0992468	164	-0.589679	0.471773		TLK2	-0.131508	2	-0.139926	0.497021
	PRKCD	0.139463	65	0.569353	0.471773		TNIK	-0.117601	1	-0.0645454	0.497021
	PRKCG	0.0929775	65	-0.517864	0.471773		TRPM7	-0.0562448	1	0.0872058	0.497021
	PRKCH	0.0821874	28	-0.505521	0.471773		TYK2	-0.0236985	2	0.237167	0.497021
	PRKCI	0.0874684	31	-0.446617	0.471773		ULK1	-0.28628	1	-0.481738	0.497021
	PRKD2	0.222404	2	0.440139	0.471773		YES1	-0.22595	2	-0.47026	0.497021
	RAF1	0.129959	98	0.426152	0.471773		ABL1	-0.089856	3	0.00705921	0.497184
	STK11	0.163321	15	0.541551	0.471773
	STK38L	-0.036349	1	-0.439401	0.471773
	SYK	0.278223	1	0.473153	0.471773
	ZAP70	0.278223	1	0.473153	0.471773
	MST1	-0.0244243	1	-0.404808	0.477126
	PRKCE	0.0977656	65	-0.40588	0.477126
	MYLK	0.252075	1	0.397299	0.478177
	ABL2	0.0256279	2	-0.367144	0.483883
	EPHB1	0.0289791	2	-0.353395	0.483883
	HIPK1	0.178315	4	0.366651	0.483883
	MET	0.068665	7	-0.356547	0.483883
	ROCK2	0.1331	46	0.353771	0.483883
	RPS6KA5	0.240163	1	0.362742	0.483883
	ALK	0.0308911	2	-0.345551	0.485095
	ADRBK1	0.106294	78	-0.226107	0.48543
	AKT1	0.123775	145	0.302338	0.48543
	AKT3	0.0967109	26	-0.272302	0.48543
	BRAF	0.0819518	5	-0.21515	0.48543
	CDK16	0.0753676	2	-0.163085	0.48543
	CLK2	0.145662	4	0.1772	0.48543
	CLK3	0.187398	2	0.296525	0.48543
	CSNK1G2	0.156305	5	0.267153	0.48543
	CSNK1G3	0.148271	3	0.166568	0.48543
	DYRK1A	0.157895	2	0.175488	0.48543
	MAK	0.0926761	10	-0.205888	0.48543
	MST3	0.0227443	1	-0.267975	0.48543
	NEK9	0.224526	1	0.31738	0.48543
	PAK2	0.127592	53	0.263398	0.48543
	PAK4	0.101313	31	-0.222999	0.48543
	PAK5	0.0850887	9	-0.261354	0.48543
	PBK	0.201409	1	0.250319	0.48543
	PDHK4	0.101348	15	-0.154725	0.48543
	PDK3	0.0646555	2	-0.207032	0.48543
	PDK4	0.0646555	2	-0.207032	0.48543
	PKN1	0.185285	2	0.287858	0.48543
	PLK1	0.103811	53	-0.238825	0.48543
	PLK4	0.0926065	7	-0.172792	0.48543
	PRKAA1	0.125075	34	0.168404	0.48543
	PRKAA2	0.106602	70	-0.206729	0.48543
	PRKACA	0.121976	102	0.200876	0.48543
	PRKG2	0.126821	42	0.219983	0.48543
	SGK1	0.0936696	15	-0.240997	0.48543
	STK10	0.208899	1	0.272046	0.48543
	STK3	0.170644	1	0.161072	0.48543
	TGFBR2	0.0885805	13	-0.277586	0.48543
	TLK2	0.156107	3	0.205944	0.48543
	ULK1	0.170622	2	0.227701	0.48543
	PIM1	0.13405	7	0.145296	0.487281
	ADRBK2	0.104824	9	-0.089599	0.489239
	GTF2F1	0.144365	1	0.0848388	0.489239
	IRAK1	0.147602	1	0.0942287	0.489239
	MAP2K2	0.109226	25	-0.0854869	0.489239
	MST4	0.14399	1	0.0837504	0.489239
	NEK6	0.147602	1	0.0942287	0.489239
	PAK6	0.127989	7	0.0987757	0.489239
	PLK2	0.157966	1	0.124295	0.489239
	PRKCZ	0.107858	31	-0.11729	0.489239
	SGK2	0.0767866	1	-0.111202	0.489239
	ULK3	0.0851881	1	-0.0868297	0.489239
	CDC42BPB	0.123595	10	0.0777523	0.489583
	PRKACG	0.119381	34	0.0720806	0.48979
	GRK1	0.109513	11	-0.0539482	0.495131
	ACVR2B	0.117009	3	0.00949225	0.496213
	CDK3	0.1188	3	0.01849	0.496213
	ERBB2	0.110203	9	-0.0427919	0.496213
	FGFR1	0.128844	1	0.0398137	0.496213
	MAP4K3	0.12237	1	0.0210327	0.496213
	SLK	0.12237	1	0.0210327	0.496213
	STK25	0.110691	1	-0.0128489	0.496213
