# Supplementary material for: Identification of a Resistance Exercise-Specific Signaling Pathway that Drives Skeletal Muscle Growth
Source: Research Square preprint supplement (doi:10.21203/rs.3.rs-4997138/v1), 2024-11-12
Supplement: Supplementary file 11 [file eaaaaaf5c7b4119fa23e8047.xlsx]

## Sheet: Supplementary Table 10
Current Proteomic Data	Current Phosphopeptide Data	Potts et al., 2017	Gonzalez-Freire et al., 2017	Deshmukh et al., 2015
Gene Name	Gene Name	Gene Name	Gene Name	Gene Name
A1BG	AAED1	A2m	AAK1	Aaas
A2M	AAK1	Aamdc	AAR2	Aacs
AAMDC	AAMDC	Aars	AASDHPPT	Aagab
AARS	ABCB6	Aarsd1	AASS	Aak1
AASDHPPT	ABCB8	Abcb10	ABCA13	Aamp
AASS	ABCC1	Abcb1a	ABCA5	Aars
ABCB10	ABCC4	Abcb6	ABCB5	Aars2
ABCB7	ABCC5	Abcb7	ABCB8	Aarsd1
ABCB8	ABCC9	Abcb8	ABCC12	Aasdhppt
ABCC9	ABCF1	Abcb9	ABCC8	Aatf
ABCE1	ABI1	Abcc1	ABCC9	Abat
ABCF1	ABI2	Abcc4	ABCD3	Abca2
ABCF2	ABL1	Abcc9	ABCF1	Abca3
ABCF3	ABL2	Abcd1	ABCF2	Abca6
ABHD10	ABLIM1	Abcd2	ABCF3	Abca7
ABHD11	ABLIM2	Abcd3	ABHD5	Abca8a
ABHD14B	ABLIM3	Abce1	ABLIM2	Abca8b
ABHD16A	ABRA	Abcf1	ABRA	Abca9
ABLIM1	ABRAXAS2	Abcf2	ACACA	Abcb10
ABLIM2	ACACB	Abcf3	ACACB	Abcb1b
ABRA	ACAD9	Abhd11	ACAT2	Abcb4
ABRAXAS2	ACADVL	Abhd12	ACBD3	Abcb6
ACAA1	ACAP2	Abhd16a	ACE2	Abcb7
ACAA2	ACAT1	Abi3bp	ACOT11	Abcb8
ACACB	ACBD3	Ablim1	ACSF3	Abcb9
ACAD8	ACBD5	Ablim2	ACSL4	Abcc1
ACAD9	ACIN1	Ablim3	ACTBL2	Abcc10
ACADM	ACLY	Abra	ACTL6A	Abcc12
ACADS	ACO1	Acaa1a	ACTR1B	Abcc4
ACADSB	ACO2	Acaa2	ACVR1B	Abcc5
ACADVL	ACOT2	Acacb	ACYP1	Abcc9
ACAP2	ACSF2	Acad10	ADAD2	Abcd1
ACAT1	ACSL1	Acad11	ADAMTS18	Abcd2
ACBD3	ACSL3	Acad12	ADAMTS4	Abcd3
ACLY	ACSS2	Acad8	ADCK2	Abcd4
ACO1	ACTB	Acad9	ADCY9	Abce1
ACO2	ACTBL2	Acadl	ADGRB3	Abcf1
ACOT1	ACTC1	Acadm	ADH1A	Abcf2
ACOT13	ACTG1	Acads	ADHFE1	Abcf3
ACOT2	ACTN1	Acadsb	ADI1	Abcg2
ACOT9	ACTN2	Acadvl	ADIPOQ	Abhd1
ACP1	ACTN3	Acat1	ADK	Abhd10
ACSF2	ACTN4	Acat2	ADO	Abhd11
ACSF3	ACTR10	Acbd3	ADPRH	Abhd12
ACSL1	ACTR1A	Ace	ADRBK1	Abhd13
ACSL3	ACYP2	Acin1	ADSS	Abhd14a
ACSL4	ADAM17	Acly	AGO1	Abhd14b
ACSS1	ADAM22	Aco1	AGO3	Abhd16a
ACSS2	ADAM9	Aco2	AGPAT5	Abhd4
ACSS3	ADAMTS19	Acot13	AGR3	Abhd5
ACTA1	ADAMTS20	Acot2	AGRN	Abhd6
ACTA2	ADAMTSL4	Acot7	AHCYL1	Abi1
ACTB	ADCY2	Acot9	AHNAK2	Abi3bp
ACTBL2	ADCY6	Acox1	AHRR	Abl1
ACTG1	ADCY9	Acox3	AHSA1	Abl2
ACTN1	ADD1	Acp1	AHSP	Ablim1
ACTN2	ADD2	Acp6	AIG1	Ablim2
ACTN3	ADD3	Acsf3	AIM1	Ablim3
ACTN4	ADPRHL1	Acsl1	AIP	Abr
ACTR10	ADPRHL2	Acsl3	AK9	Abra
ACTR1A	ADRB2	Acsl4	AKAP1	Abt1
ACTR1B	ADRM1	Acsl6	AKAP17A	Abtb1
ACTR2	ADSL	Acss1	AKAP2	Abtb2
ACTR3	ADSSL1	Acta1	AKAP6	Acaa1a;Acaa1b
ACY1	AEBP2	Acta2	AKAP9	Acaa2
ACYP2	AFAP1	Actbl2	AKR1B15	Acaca
ADD1	AFAP1L1	Actc1	AKR1D1	Acacb
ADD3	AFAP1L2	Actg1	AKT1	Acad10
ADH1A	AFDN	Actl6a	AKT1S1	Acad11
ADH1B	AFF4	Actl6b	AKT2	Acad12
ADH5	AGAP1	Actn1	ALDH16A1	Acad8
ADHFE1	AGAP2	Actn2	ALDH1A2	Acad9
ADI1	AGAP3	Actn3	ALDH1A3	Acadl
ADK	AGBL1	Actn4	ALDH3A1	Acadm
ADO	AGFG1	Actr	ALDOB	Acads
ADPRHL1	AGL	Actr10	ALG11	Acadsb
ADPRHL2	AGO2	Actr1a	ALG5	Acadvl
ADRM1	AGPS	Actr1b	ALG9	Acap2
ADSL	AHCTF1	Actr2	ALK	Acat1
ADSSL1	AHCY	Actr3	ALKBH3	Acat2;Acat3
AFG3L2	AHCYL2	Acy1	ALKBH8	Acbd3
AFM	AHDC1	Acy3	ALPK2	Acbd5
AGAP1	AHNAK	Acyp1	ALPK3	Acbd6
AGBL1	AHNAK2	Acyp2	ALYREF	Accs
AGK	AHSG	Ada	AMBP	Ace
AGL	AIFM1	Adal	AMMECR1L	Ache
AGMAT	AIMP1	Adam10	AMOT	Acin1
AGO2	AK1	Adam17	AMOTL1	Acly
AGPAT1	AK2	Adar	AMPH	Acn9
AGPAT3	AK3	Adck1	AMZ2	Aco1
AGRN	AKAP1	Adck3	ANAPC10	Aco2
AGT	AKAP10	Adcy10	ANK2	Acot1
AHCY	AKAP11	Adcy9	ANKHD1	Acot11
AHCYL1	AKAP12	Add1	ANKIB1	Acot13
AHCYL2	AKAP13	Add2	ANKLE2	Acot2
AHNAK	AKAP17A	Add3	ANKMY2	Acot7
AHSA1	AKAP2	Adh1	ANKRD20A1	Acot8
AHSP	AKAP6	Adh5	ANKRD20A4	Acot9;Acot10
AIFM1	AKAP9	Adhfe1	ANKRD28	Acox1
AIMP1	AKIP1	Adi1	ANKRD36C	Acox3
AIMP2	AKR1B1	Adipoq	ANKRD50	Acp1
AK1	AKT1	Adk	ANKRD6	Acp2
AK2	AKT1S1	Ado	ANO1	Acp5
AK3	AKT2	Adprh	ANO10	Acp6
AKAP1	AKTIP	Adprhl1	ANO2	Acpl2
AKAP12	ALAD	Adprhl2	ANO6	Acsf2
AKR1A1	ALB	Adrm1	ANOS1	Acsf3
AKR1B1	ALDH1L1	Adsl	ANP32A	Acsl1
AKR1C1	ALDH3A2	Adss	ANXA2P2	Acsl3
AKR1C3	ALDH5A1	Adssl1	AOC2	Acsl4
AKR7A2	ALDH7A1	Aebp1	AOX1	Acsl5
AKT1S1	ALDH9A1	Aff3	AP1B1	Acsl6
AKT2	ALDOA	Afg3l2	AP1M1	Acss1
AKTIP	ALDOC	Afm	AP1S3	Acss2
ALAD	ALG3	Aga	AP3B1	Acss3
ALB	ALKBH5	Agbl1	AP3D1	Acta1
ALDH16A1	ALOX15B	Agk	AP3S1	Acta2
ALDH1A1	ALPK3	Agl	APC2	Actb
ALDH1A2	ALS2	Ago2	APIP	Actbl2
ALDH1B1	AMFR	Agpat1	APOH	Actg1
ALDH1L1	AMOT	Agpat3	APOL2	Actg1;Actb
ALDH2	AMOTL1	Agpat5	APOL3	Actl6a
ALDH3A2	AMPD1	Agpat6	APOL5	Actn1
ALDH4A1	AMPD2	Agpat9	APOM	Actn2
ALDH5A1	AMPD3	Agps	APOO	Actn3
ALDH6A1	ANAPC1	Agrn	AQP1	Actn4
ALDH7A1	ANAPC4	Agt	AQP4	Actr10
ALDH9A1	ANK1	Ahcy	AR	Actr1a
ALDOA	ANK2	Ahcyl2	ARAF	Actr1b
ALDOC	ANK3	Ahnak	AREL1	Actr2
ALPK3	ANKIB1	Ahnak2	ARFGAP2	Actr3
AMBP	ANKLE2	Ahsa1	ARFGEF2	Actr5
AMPD1	ANKRD13D	Ahsg	ARFGEF3	Actr6
AMPD2	ANKRD17	AI837181	ARFIP1	Actr8
AMPD3	ANKRD2	Aifm1	ARHGAP10	Acvr1
ANK1	ANKRD26	Aim1	ARHGAP17	Acy1
ANK2	ANKRD27	Aimp1	ARHGAP18	Acy3
ANK3	ANKRD28	Aimp2	ARHGAP40	Acyp1
ANKRD1	ANKRD35	Aip	ARHGEF10L	Acyp2
ANKRD2	ANKRD54	Ak1	ARHGEF12	Ada
ANO10	ANKRD9	AK157302	ARHGEF28	Adal
ANO6	ANKS1A	Ak2	ARHGEF37	Adam10
ANP32A	ANKZF1	Ak3	ARHGEF6	Adam15
ANP32B	ANP32B	Ak4	ARHGEF7	Adam17
ANP32E	ANTXR1	Ak6	ARID4B	Adam19
ANXA1	ANXA11	Akap1	ARIH1	Adam23
ANXA11	ANXA2	Akap12	ARIH2	Adam9
ANXA2	ANXA5	Akap13	ARL6IP1	Adamts1
ANXA3	ANXA6	Akap2	ARL8A	Adamts10
ANXA4	ANXA7	Akap6	ARMC1	Adamts4
ANXA5	AP2A1	Akap8l	ARMC8	Adamts5
ANXA6	AP2B1	Akap9	ARMCX2	Adamtsl1
ANXA7	AP3B1	Akr1a1	ARPC1A	Adamtsl2
AOC3	AP3D1	Akr1b10	ARPIN	Adamtsl3
AP1B1	AP4E1	Akr1b3	ARPP19	Adamtsl4
AP1G1	APBA1	Akr1b7	ART1	Adamtsl5
AP1M1	APBB2	Akr1e2	ASB1	Adar
AP2A1	APC	Akr7a2	ASB10	Adarb1
AP2B1	APEH	Akt1	ASB2	Adat2
AP2M1	API5	Akt1s1	ASMTL	Adat3
AP3D1	APIP	Akt2	ASPM	Adck1
APC	APMAP	Aktip	ASPN	Adck2
APCS	APOA2	Alad	ASTN1	Adck3
APEH	APOB	Alas1	ASUN	Adck4
APEX1	APOBEC2	Alb	ATAD1	Adck5
API5	APOL1	Aldh16a1	ATE1	Adcy2
APIP	APOO	Aldh18a1	ATF1	Adcy4
APMAP	APOOL	Aldh1a1	ATG2B	Adcy6
APOA1	APPL1	Aldh1l1	ATG4C	Adcy7
APOA2	APRT	Aldh1l2	ATG7	Adcy9
APOA4	AQP4	Aldh2	ATG9A	Add1
APOB	AR	Aldh3a2	ATL1	Add2
APOBEC2	ARAF	Aldh4a1	ATL2	Add3
APOC1	ARAP1	Aldh5a1	ATP11C	Adh1
APOC3	ARFGAP1	Aldh6a1	ATP12A	Adh5
APOC4-APOC2	ARFGAP2	Aldh7a1	ATP13A1	Adh7
APOD	ARFGEF1	Aldh9a1	ATP2B2	Adhfe1
APOE	ARFGEF2	Aldoa	ATP4A	Adi1
APOH	ARGLU1	Aldoart2	ATP5G1	Adipoq
APOL1	ARHGAP1	Alg9	ATP5L2	Adipor1
APOL2	ARHGAP10	Alkbh3	ATP6V0A1	Adipor2
APOM	ARHGAP12	Alkbh7	ATP6V1B1	Adk
APOO	ARHGAP17	Alpk2	ATP6V1C1	Adnp
APOOL	ARHGAP21	Alpk3	ATP6V1F	Ado
APPL1	ARHGAP25	Alpl	ATP6V1G1	Adpgk
APRT	ARHGAP28	Alyref	ATP6V1H	Adprh
ARAF	ARHGAP29	Amacr	ATP8B2	Adprhl1
ARCN1	ARHGAP31	Ambp	ATRX	Adprhl2
ARF1	ARHGAP32	Amd1	ATXN10	Adrb3
ARF4	ARHGAP35	Amdhd2	ATXN1L	Adrbk1
ARF5	ARHGAP45	Amfr	ATXN2	Adrm1;Gm9774
ARF6	ARHGAP6	Ampd1	ATXN2L	Adsl
ARHGAP1	ARHGDIA	Ampd2	ATXN7	Adss
ARHGAP17	ARHGEF1	Ank1	AUP1	Adssl1
ARHGAP25	ARHGEF10L	Ank2	AVEN	Aebp1
ARHGDIA	ARHGEF11	Ank3	AXDND1	Aen
ARHGDIB	ARHGEF12	Ankrd1	AXIN1	Aes
ARHGEF10L	ARHGEF15	Ankrd13b	AZIN2	Afap1
ARHGEF15	ARHGEF17	Ankrd17	B3GALNT2	Afap1l1
ARHGEF6	ARHGEF2	Ankrd2	BABAM1	Afap1l2
ARHGEF7	ARHGEF40	Ankrd24	BAG1	Afg3l1
ARIH1	ARHGEF6	Ankrd61	BAG2	Afg3l2
ARL1	ARHGEF7	Ano10	BAG3	Afm
ARL3	ARID1A	Ano6	BAG5	Aftph
ARL6IP5	ARID3A	Anp32a	BAIAP2L1	Ag2
ARL8B	ARL6IP4	Anp32b	BANF2	Aga
ARMC1	ARL6IP6	Anp32e	BASP1	Agap1
ARMCX3	ARMCX2	Anpep	BAZ1A	Agap3
ARMT1	ARMCX3	Anxa1	BAZ2A	Agbl1
ARPC1A	ARPC2	Anxa11	BAZ2B	Agfg1
ARPC2	ARPC5L	Anxa2	BBC3	Agfg2
ARPC3	ARPP19	Anxa3	BCAN	Aggf1
ARPC4-TTLL3	ARPP21	Anxa4	BCAS3	Agk
ARPC5L	ARRB1	Anxa5	BCAT1	Agl
ARPP19	ARVCF	Anxa6	BCCIP	Agpat1
ART3	ARX	Anxa7	BCDIN3D	Agpat2
AS3MT	ASAP3	Aoc3	BCKDHA	Agpat3
ASAH1	ASB2	Ap1b1	BCKDHB	Agpat4
ASB10	ASIC3	Ap1g1	BCLAF1	Agpat5
ASB2	ASPSCR1	Ap1m1	BCO2	Agpat6
ASB4	ATAD1	Ap2a1	BCOR	Agpat9
ASNA1	ATAD3A	Ap2a2	BECN1	Agphd1
ASPA	ATAT1	Ap2b1	BICD2	Agps
ASPH	ATF7IP	Ap2m1	BIRC2	Agrn
ASPN	ATG13	Ap2s1	BIRC6	Agt
ASPSCR1	ATG16L1	Ap3b1	BMP15	Agtpbp1
ASS1	ATG2A	Ap3d1	BMPR2	Agxt2l2
ATAD1	ATG2B	Ap3s1	BNIP3	Ahctf1
ATAD3A	ATG9A	Apbb1ip	BOLA1	Ahcy
ATE1	ATIC	Apeh	BOLA2; BOLA2B	Ahcyl1
ATG3	ATL1	Apex1	BOLA3	Ahcyl2
ATG7	ATL2	Api5	BOP1	Ahdc1
ATG9A	ATN1	Apip	BPNT1	Ahnak
ATIC	ATP11A	Apmap	BRCA2	Ahnak2
ATL2	ATP13A1	Apoa1	BRCC3	Ahsa1
ATL3	ATP1A2	Apoa1bp	BRE	Ahsa2
ATP1A1	ATP1B4	Apoa2	BROX	Ahsg
ATP1A2	ATP2A1	Apoa4	BRPF3	AI314976
ATP1B1	ATP2A2	Apob	BRS3	AI481877
ATP2A1	ATP2B1	Apobec2	BSCL2	AI607873
ATP2A2	ATP2B2	Apoc1	BSN	AI837181;Bles03
ATP2A3	ATP5F1	Apoc3	BST2	Aida
ATP2B1	ATP5F1A	Apoe	BTAF1	Aifm1
ATP2B4	ATP5F1B	Apoh	BTBD3	Aifm2
ATP5F1	ATP5F1C	Apom	BTN2A1	Aim1
ATP5F1A	ATP5H	Apoo	BTNL10	Aimp1
ATP5F1B	ATP5J	Apool	BTRC	Aimp2
ATP5F1C	ATP5MC3	Appl1	BUB3	Aip
ATP5F1D	ATP5MF-PTCD1	Aprt	BZW1	Ajuba
ATP5F1E	ATP5PO	Aqp1	C10orf113	Ak1
ATP5H	ATP8A1	Aqp4	C10orf71	Ak2
ATP5IF1	ATRX	Aqr	C11orf57	Ak3
ATP5J	ATXN1	Arcn1	C11orf68	Ak4
ATP5L	ATXN10	Arf2	C12orf57	Akap1
ATP5ME	ATXN1L	Arf3	C12orf73	Akap10
ATP5MF-PTCD1	ATXN2	Arf4	C14orf105	Akap11
ATP5PO	ATXN2L	Arf5	C15orf52	Akap12
ATP5S	AUP1	Arf6	C16orf58	Akap13
ATP6V0A1	AUTS2	Arfgap1	C16orf62	Akap2
ATP6V1A	AVEN	Arfgap2	C16orf96	Akap6
ATP6V1B2	BACH1	Arfgef2	C17orf105	Akap8
ATP6V1C1	BACH2	Arfip1	C17orf62	Akap8l
ATP6V1D	BAD	Arglu1	C17orf89	Akap9
ATP6V1E1	BAG3	Arhgap1	C17orf99	Akr1a1
ATP6V1F	BAG4	Arhgap10	C18orf32	Akr1b1;Gm6736
ATP6V1G1	BAG6	Arhgap15	C19orf25	Akr1b10
ATP6V1H	BAIAP3	Arhgap17	C19orf43	Akr1b7
ATPAF1	BAZ1B	Arhgap29	C19orf47	Akr1b8
ATPAF2	BAZ2A	Arhgap31	C1orf112	Akr1c13
ATXN10	BBX	Arhgdia	C1orf198	Akr1c14
ATXN2L	BCAM	Arhgdib	C1R	Akr1e2;Akr1e1
AUH	BCAP31	Arhgef1	C20orf24	Akr7a2
AUP1	BCAR1	Arhgef10l	C20orf27	Akt1
AVEN	BCAR3	Arhgef12	C20orf62	Akt1s1
AZGP1	BCAS3	Arhgef2	C21orf59	Akt2
BABAM2	BCCIP	Arhgef7	C2orf50	Akt3
BAG2	BCKDK	Arih1	C2orf69	Aktip
BAG3	BCL2L12	Arih2	C3orf20	Alad
BAG6	BCL2L13	Arl1	C3orf30	Alas1
BANF1	BCL6	Arl3	C3orf70	Alb
BCAM	BCL9	Arl6ip1	C4orf3	Alcam
BCAP29	BCL9L	Arl6ip5	C5orf45	Aldh16a1
BCAP31	BCLAF1	Arl8b	C6	Aldh18a1
BCAR1	BCLAF3	Armc1	C6orf120	Aldh1a1
BCAT2	BET1	Armc10	C6orf163	Aldh1a7
BCKDHB	BET1L	Armc6	C7	Aldh1l1
BCKDK	BHLHE40	Arnt2	C7orf55	Aldh1l2
BCL2L13	BIN1	Arpc1b	C8G	Aldh2
BCS1L	BIN2	Arpc2	C9orf64	Aldh3a1
BDH1	BIVM-ERCC5	Arpc3	CA14	Aldh3a2
BGN	BLM	Arpc4	CA4	Aldh3b1
BIN1	BLOC1S1	Arpc5	CA6	Aldh3b2
BLMH	BLVRA	Arpc5l	CACNA1C	Aldh4a1
BLVRA	BLVRB	Arpp19	CACNB3	Aldh5a1
BLVRB	BMP2KL	Arrb1	CADPS2	Aldh6a1
BOLA2	BMPR2	Art1	CALB1	Aldh7a1
BPGM	BNIP2	Art3	CALCOCO2	Aldh9a1
BPHL	BNIP3	As3mt	CALML3	Aldoa
BPNT1	BOD1L1	Asb10	CAMK1G	Aldoa;Aldoart1
BPTF	BOLA1	Asb12	CAMK2G	Aldoart2
BRCC3	BORCS5	Asb15	CAMLG	Alg1
BROX	BORCS6	Asb2	CAP1	Alg10b
BRPF1	BPGM	Asl	CAPG	Alg11
BSG	BPTF	Asna1	CAPN7	Alg12
BST2	BRAF	Asns	CAPRIN2	Alg14
BTF3	BRAP	Asph	CARNS1	Alg2
BTF3L4	BRD3	Aspm	CARS2	Alg3
BZW1	BRD4	Aspn	CASC5	Alg5
BZW2	BRD8	Aspscr1	CAST	Alg6
C11orf54	BRD9	Asrgl1	CATSPER4	Alg8
C11orf68	BRF2	Ass1	CATSPERD	Alg9
C19orf25	BRPF1	Atad1	CBFB	Alkbh3
C19orf70	BSDC1	Atad3	CBLL1	Alkbh5
C1orf123	BSG	Ate1	CBR4	Alkbh7
C1QBP	BTAF1	Atg3	CBX1	Alkbh8
C1S	BTBD2	Atg4a	CC2D1A	Alms1
C3	BTF3	Atg7	CC2D1B	Alox5ap
C4A	BUB3	Atg9a	CCAR1	Alpk1
C4B_2	BUD13	Atic	CCAR2	Alpk2
C4BPA	BZW1	Atl2	CCBL1	Alpk3
C4orf54	C11orf52	Atl3	CCDC103	Alpl
C5	C11orf96	Atox1	CCDC108	Als2
C6	C12orf43	Atp12a	CCDC122	Alyref
C8B	C12orf45	Atp13a1	CCDC125	Amacr
C9	C15orf53	Atp1a1	CCDC13	Ambp
C9orf64	C18orf25	Atp1a2	CCDC134	Amd2;Amd1
CA1	C19orf47	Atp1a3	CCDC141	Amdhd2
CA2	C1orf198	Atp1b1	CCDC151	Amfr
CA3	C1orf21	Atp1b2	CCDC153	Ammecr1
CAB39	C1QBP	Atp1b3	CCDC170	Ammecr1l
CACNA1D	C1R	Atp1b4	CCDC171	Amn1
CACNA1S	C2CD2L	Atp2a1	CCDC177	Amot
CACNA2D1	C2CD5	Atp2a2	CCDC22	Amotl1
CACNB1	C2orf49	Atp2a3	CCDC25	Amotl2
CACNG1	C2orf69	Atp2b1	CCDC40	Ampd1
CACYBP	C3	Atp2b3	CCDC42B	Ampd2
CALM2	C4orf54	Atp2b4	CCDC43	Ampd3
CALR	C5AR1	Atp5a1	CCDC47	Amy1
CALU	C6orf106	Atp5b	CCDC50	Amz2
CAMK2A	C6orf47	Atp5c1	CCDC57	Anapc1
CAMK2B	C7orf43	Atp5d	CCDC6	Anapc13
CAMK2G	C7orf50	Atp5e	CCDC60	Anapc2
CAND1	C9orf135	Atp5f1	CCDC61	Anapc4
CAND2	C9orf40	Atp5i	CCDC62	Anapc5
CANX	C9orf78	Atp5j	CCDC66	Anapc7
CAP1	CA2	Atp5j2	CCDC67	Angel2
CAP2	CA3	Atp5k	CCDC73	Angpt1
CAPG	CACNA1G	Atp5l	CCDC88B	Angptl1
CAPN1	CACNA1S	Atp5o	CCDC88C	Angptl2
CAPN2	CACNB1	Atp5s	CCDC9	Angptl7
CAPN3	CACUL1	Atp6v0a1	CCDC90B	Ank1
CAPN7	CAD	Atp6v0d1	CCDC92	Ank2
CAPNS1	CALD1	Atp6v1a	CCDC93	Ank3
CAPZA1	CALR	Atp6v1b2	CCDC96	Ankfy1
CAPZA2	CAMK2A	Atp6v1c1	CCNE1	Ankh
CAPZB	CAMK2B	Atp6v1d	CCNY	Ankhd1
CARD19	CAMK2D	Atp6v1e1	CCPG1	Ankle2
CARM1	CAMK2G	Atp6v1f	CCS	Ankmy2
CARNS1	CAMKK1	Atp6v1g1	CD34	Ankrd1
CARS	CAMKK2	Atp6v1h	CD47	Ankrd12
CARS2	CAMLG	Atp7a	CD48	Ankrd13a
CASQ1	CAMSAP1	Atp8a1	CD55	Ankrd13b
CASQ2	CAMSAP2	Atpaf1	CD5L	Ankrd17
CAST	CAND1	Atpaf2	CD93	Ankrd2
CAT	CANX	Atpif1	CD99	Ankrd23
CAV1	CAP1	Atxn10	CD99L2	Ankrd27
CAV2	CAP2	Atxn2	CDC34	Ankrd28
CAV3	CAPN1	Atxn2l	CDC37L1	Ankrd39
CAVIN1	CAPN15	Auh	CDH1	Ankrd40
CAVIN2	CAPN3	Aup1	CDH5	Ankrd44
CAVIN3	CAPN7	Aurkaip1	CDHR1	Ankrd46
CAVIN4	CAPZA2	Azgp1	CDK11A	Ankrd50
CBR1	CAPZB	B2m	CDK3	Ankrd52
CBR4	CARHSP1	Babam1	CDK5	Anks1;Anks1a
CBX3	CARS	Bag1	CDK5RAP2	Anks3
CC2D1B	CASC3	Bag2	CDKL5	Ankzf1
CCAR2	CASK	Bag3	CDKN1B	Anln
CCDC124	CASKIN2	Bag6	CDRT1	Ano10
CCDC127	CASP9	Banf1	CDRT15L2	Ano6
CCDC130	CASQ1	Basp1	CDYL	Ano8
CCDC167	CASQ2	Bax	CECR2	Anp32a
CCDC22	CASS4	Baz1b	CELF1	Anp32b
CCDC25	CAST	BC048546	CENPA	Anp32e
CCDC43	CASZ1	Bcam	CENPE	Anpep
CCDC47	CAV1	Bcap29	CENPF	Antxr1
CCDC51	CAV2	Bcap31	CENPQ	Antxr2
CCDC58	CAVIN1	Bcas2	CENPV	Anxa1
CCDC6	CAVIN2	Bcat2	CEP128	Anxa11
CCDC93	CAVIN3	Bckdha	CEP131	Anxa2
CCDC97	CAVIN4	Bckdhb	CEP152	Anxa3
CCDC9B	CBFB	Bckdk	CEP170B	Anxa4
CCPG1	CBL	Bcl11b	CEP290	Anxa5
CCS	CBLL1	Bcl2l1	CEP350	Anxa6
CCT2	CBR1	Bcl2l13	CEP41	Anxa7
CCT3	CBX1	Bclaf1	CEP68	Aoc3
CCT4	CBX3	Bcs1l	CEP83	Aox1
CCT5	CC2D1A	Bdh2	CEP85L	Ap1b1
CCT6A	CC2D1B	Bgn	CEP89	Ap1g1
CCT7	CCAR2	Bin1	CEP95	Ap1m1
CCT8	CCDC124	Bles03	CERS1	Ap1s1
CCZ1	CCDC127	Blmh	CETN1	Ap1s2
CD151	CCDC130	Bloc1s1	CFAP45	Ap2a1
CD34	CCDC136	Blvra	CFAP47	Ap2a2
CD36	CCDC137	Blvrb	CFAP53	Ap2b1
CD38	CCDC22	Bnip1	CFD	Ap2m1
CD44	CCDC28B	Bnip2	CFP	Ap2s1
CD47	CCDC43	Bnip3	CGN	Ap3b1
CD55	CCDC6	Bola1	CHCHD1	Ap3d1
CD63	CCDC69	Bola2	CHCHD10	Ap3m1
CD81	CCDC85A	Bola3	CHCHD5	Ap3m2
CD9	CCDC86	Bpgm	CHCHD7	Ap3s1;Ap3s1-ps2
CD99	CCDC88A	Bphl	CHD2	Ap3s2
CDC34	CCDC9	Bpifa2	CHD3	Ap4b1
CDC37	CCDC91	Bpnt1	CHGB	Ap4e1
CDC37L1	CCDC92	Brcc3	CHI3L1	Ap4m1
CDC42	CCDC97	Brd4	CHID1	Ap4s1
CDH13	CCDC9B	Brix1	CHMP1A	Ap5b1
CDK12	CCM2	Brox	CHMP1B	Ap5m1
CDK5RAP3	CCM2L	Brpf1	CHMP2A	Ap5z1;C330006K01Rik
CDKN2C	CCNK	Bsg	CHMP2B	Apaf1
CDS2	CCNL1	Bst2	CHMP4A	Apba3
CDV3	CCNL2	Btf3	CHMP4BP1	Apbb1
CEFIP	CCNT2	Btf3l4	CHMP7	Apbb1ip
CENPV	CCNY	Bub3	CHORDC1	Apbb2
CES2	CCNYL1	Bud31	CHPF2	Apc
CFH	CCPG1	Bves	CHRNA9	Apeh
CFL1	CCS	Bysl	CHRNB3	Apex1
CFL2	CCT3	Bzw1	CHRND	Api5
CHCHD10	CCT4	Bzw2	CHTOP	Apip
CHCHD2P9	CCZ1	C1qb	CIAO1	Aplp2
CHCHD3	CD248	C1qbp	CIAPIN1	Apmap
CHD4	CD276	C1ra	CILP	Apoa1
CHDH	CD2AP	C2cd2	CISD2	Apoa1bp
CHMP1A	CD2BP2	C3	CISD3	Apoa2
CHMP1B	CD34	C4b	CIT	Apoa4
CHMP2A	CD44	C5	CKAP5	Apob
CHMP4B	CD99	C6	CKMT1A; CKMT1B	Apobec2
CHMP6	CDC123	C7	CLASP1	Apobec3
CHORDC1	CDC42	C8a	CLASP2	Apoc1
CHP1	CDC42BPA	C8b	CLCC1	Apoc3
CHURC1-FNTB	CDC42BPB	C8g	CLCN7	Apoe
CIAPIN1	CDC42BPG	C9	CLEC11A	Apoh
CILP	CDC42EP1	Ca1	CLGN	Apol10b
CIRBP	CDC42EP2	Ca14	CLHC1	Apoo
CISD1	CDC42EP3	Ca2	CLINT1	Apool
CISD2	CDC42EP4	Ca3	CLMN	App
CISD3	CDH15	Cab39	CLNS1A	Appl1
CKAP4	CDIP1	Cacna1s	CLPTM1	Appl2
CKAP5	CDK11B	Cacna2d1	CLTA	Aprt
CKB	CDK12	Cacnb1	CLTB	Aptx
CKM	CDK14	Cacnb3	CLTCL1	Aqp1
CKMT1A	CDK16	Cacng1	CMA1	Aqp4
CKMT2	CDK17	Cacng6	CMAS	Aqp7
CLASP1	CDK18	Cacybp	CMC1	Aqr
CLCC1	CDK7	Cad	CMC2	Araf
CLEC3B	CDK9	Cald1	CMC4	Arap1
CLIC1	CDKN1B	Calm1	CMIP	Arap3
CLIC4	CDS2	Calr	CMPK2	Arcn1
CLIC5	CDV3	Calu	CMTR1	Arf1;Arf3
CLINT1	CECR2	Camk2a	CNDP2	Arf2
CLIP1	CEFIP	Camk2b	CNGB1	Arf4
CLNS1A	CENPB	Camk2d	CNIH4	Arf5
CLPB	CENPC	Camk2g	CNN2	Arf6
CLPP	CENPV	Cand1	CNOT1	Arfgap1
CLTB	CEP128	Cand2	CNOT10	Arfgap2
CLTC	CEP131	Canx	CNOT4	Arfgap3
CLU	CEP170	Cap1	CNP	Arfgef1
CLUH	CEP192	Cap2	CNTFR	Arfgef2
CLYBL	CEP350	Capg	CNTLN	Arfip1
CMAS	CEP68	Capn1	CNTN2	Arglu1
CMBL	CEP85	Capn11	CNTN4	Arhgap1
CMC1	CEPT1	Capn2	CNTROB	Arhgap10
CMC2	CETN2	Capn3	COA4	Arhgap12
CMC4	CFL1	Capn5	COA5	Arhgap17
CMPK1	CFL2	Capns1	COA7	Arhgap18
CMYA5	CHAF1B	Caprin1	COL15A1	Arhgap21
CNBP	CHAMP1	Capza1	COL16A1	Arhgap22
CNDP2	CHCHD3	Capza2	COL22A1	Arhgap23
CNN1	CHD4	Capzb	COL26A1	Arhgap24
CNN3	CHD8	Carhsp1	COL28A1	Arhgap28
CNP	CHGB	Carkd	COL4A1	Arhgap29
CNRIP1	CHMP2B	Carm1	COL4A3	Arhgap31
COA3	CHMP3	Carns1	COL4A6	Arhgap32
COA4	CHMP5	Cars	COL5A1	Arhgap35
COA5	CHMP7	Cars2	COL5A2	Arhgap42
COA6	CHORDC1	Casc3	COL5A3	Arhgap44
COASY	CHP1	Casc5	COL6A6	Arhgap5
COBL	CHRAC1	Casp3	COLGALT2	Arhgap6
COL14A1	CIAPIN1	Casq1	COMMD10	Arhgdia
COL15A1	CIART	Casq2	COMP	Arhgdib
COL18A1	CIC	Cast	COPA	Arhgef1
COL1A1	CIDEA	Cat	COPE	Arhgef10
COL1A2	CIRBP	Cav1	COPS7B	Arhgef10l
COL3A1	CISD1	Cav3	CORO1B	Arhgef11
COL4A1	CIT	Cbfb	CORO1C	Arhgef12
COL4A2	CKAP5	Cbr1	CORO7	Arhgef17
COL6A1	CKB	Cbr2	COX15	Arhgef18
COL6A2	CKM	Cbr3	COX17	Arhgef2
COL6A3	CKMT1A	Cbr4	COX20	Arhgef25
COMT	CKMT2	Cbwd1	COX6A1	Arhgef40
COPA	CLASP1	Cbx1	COX7B	Arhgef5
COPB1	CLASP2	Cbx3	COX8A	Arhgef6
COPB2	CLASRP	Cbx5	CPEB2	Arhgef7
COPE	CLCN1	Cc2d1b	CPEB3	Arid1a
COPG1	CLCN2	Ccar1	CPED1	Arid1b
COPG2	CLDN5	Ccar2	CPNE1	Arid2
COPS2	CLEC16A	Ccbl1	CPPED1	Arid4a
COPS3	CLIC6	Ccbl2	CPSF6	Arid4b
COPS4	CLINT1	Ccdc124	CPSF7	Arid5b
COPS5	CLIP1	Ccdc127	CRACR2A	Arih1
COPS6	CLIP2	Ccdc134	CRBN	Arih2
COPS7A	CLIP4	Ccdc158	CREBRF	Arl1
COPS7B	CLK3	Ccdc167	CRIP1	Arl15
COPS8	CLN3	Ccdc22	CRMP1	Arl2
COQ10A	CLN6	Ccdc25	CROCC	Arl2bp
COQ3	CLNS1A	Ccdc28a	CRYL1	Arl3
COQ5	CLSTN3	Ccdc43	CRYZL1	Arl5a;Arl5b
COQ6	CLTC	Ccdc47	CSGALNACT1	Arl6
COQ7	CLTCL1	Ccdc50	CSK	Arl6ip1
COQ8A	CLU	Ccdc51	CSNK2A1	Arl6ip5
COQ9	CLUH	Ccdc58	CSNK2B	Arl8a
CORO7-PAM16	CMBL	Ccdc6	CSRP2	Arl8b
COTL1	CMTM4	Ccdc63	CST3	Armc1
COX11	CMYA5	Ccdc90b	CTAGE4	Armc10
COX15	CNBP	Ccdc91	CTBP1	Armc5
COX17	CNIH4	Ccny	CTDNEP1	Armc6
COX19	CNNM4	Ccpg1	CTF1	Armc8
COX20	CNOT2	Ccs	CTIF	Armcx1
COX4I1	CNOT3	Ccsmst1	CTNNA1	Armcx2
COX5A	CNOT4	Cct2	CTNNB1	Armcx3
COX5B	CNST	Cct3	CTNNBIP1	Armcx4
COX6A2	COBL	Cct4	CTNND1	Arnt
COX6B1	COBLL1	Cct5	CTPS1	Arntl
COX6C	COG5	Cct6a	CTSA	Arpc1a
COX7A2	COG7	Cct6b	CTSK	Arpc1b
COX7A2L	COL1A1	Cct7	CTU1	Arpc2
COX7B	COL27A1	Cctq	CUX2	Arpc3
COX7C	COL3A1	Ccz1	CWC15	Arpc4
CP	COL4A2	Cd163	CXorf38	Arpc5
CPA3	COL4A3BP	Cd2ap	CXorf57	Arpc5l
CPNE1	COL6A3	Cd300lg	CYB5A	Arpp19
CPNE3	COPA	Cd34	CYBRD1	Arrb1
CPOX	COPB2	Cd36	CYFIP1	Arrb2
CPPED1	COPRS	CD38	CYLD	Arrdc1
CPT1B	COPS4	Cd3e	CYP27A1	Arsa
CPT2	COPS7A	Cd44	CYP2C9	Arsb
CRADD	COPS8	Cd47	CYP2D6	Arsg
CRAT	COQ8A	CD59A	CYP4X1	Arsj
CRELD1	CORO6	Cd9	CYP8B1	Art1
CRIP2	CORO7-PAM16	Cd93	CYSTM1	Art3
CRKL	COX4I1	Cd97	CYTH1	Arvcf
CROCC	COX5B	Cd99	DACT1	As3mt
CRYAB	COX6A2	Cd99l2	DARS2	Asah1
CRYL1	COX7C	Cdc123	DAZAP1	Asap1
CRYZ	CPEB3	Cdc34	DCAF11	Asap2
CS	CPEB4	Cdc37	DCAF7	Asb1
CSDE1	CPNE3	Cdc37l1	DCAF8	Asb10
CSE1L	CPSF2	Cdc42	DCAF8L1	Asb11
CSNK1A1	CPSF7	Cdc42bpa	DCLK1	Asb12
CSNK2A1	CPT1B	Cdc5l	DCPS	Asb13
CSNK2B	CRAT	Cdh13	DCTN6	Asb14
CSPG4	CREB5	Cdh15	DCUN1D1	Asb15
CSRP1	CREBBP	Cdh5	DCUN1D2	Asb16
CSRP3	CRELD1	Cdh8	DDIAS	Asb18
CSTB	CRIP2	Cdk1	DDN	Asb2
CSTF2T	CRK	Cdk17	DDRGK1	Asb3
CTBP1	CRKL	Cdk5	DDTL	Asb4
CTNNB1	CROCC	Cdk5rap3	DDX20	Asb5
CTPS1	CRTC2	Cdk6	DDX21	Asb6
CTSD	CRTC3	Cdkl3	DDX31	Asb8
CTSG	CRYAB	Cdkn1b	DDX42	Ascc1
CTTN	CRYBG3	Cdnf	DDX46	Ascc2
CUL1	CRYZ	Cds2	DDX50	Ascc3
CUL2	CS	Cdv3	DECR2	Asf1a
CUL3	CSDE1	Cecr5	DEFA1; DEFA1B	Asf1b
CUL4A	CSE1L	Celf1	DFFA	Ash1l
CUL5	CSKMT	Celf2	DGAT2	Ash2l
CUTA	CSNK1A1	Cend1	DGCR14	Asl
CUTC	CSNK1D	Cenpf	DGKI	Asna1
CYB5A	CSNK1E	Cenpv	DGKZ	Asns
CYB5B	CSNK1G1	Cep68	DGUOK	Asnsd1
CYB5R1	CSNK2B	Cers2	DHCR24	Aspa
CYB5R3	CSRP1	Cers6	DHCR7	Asph
CYC1	CSRP3	Ces1b	DHPS	Aspn
CYCS	CSTF2T	Ces1c	DHRS11	Aspscr1
CYGB	CSTF3	Ces1d	DHRS12	Asrgl1
CYP27A1	CTDP1	Cetn2	DHRS7C	Ass1
CYSTM1	CTDSPL2	Cfb	DHTKD1	Aste1
CYTH1	CTIF	Cfd	DHX29	Asun;4933424B01Rik
D2HGDH	CTNNA1	Cfh	DHX30	Atad1
DAG1	CTNNA3	Cfi	DHX36	Atad2
DAP3	CTNNB1	Cfl1	DHX40	Atad2b
DARS	CTNND1	Cfl2	DIAPH1	Atad3;Atad3a
DARS2	CTPS1	Cfp	DIAPH2	Atad5
DBI	CTR9	Cggbp1	DICER1	Ate1
DBNL	CTTN	Chchd1	DIEXF	Atf1
DBT	CTTNBP2NL	Chchd2	DIP2A	Atf7
DCAF11	CUEDC2	Chchd3	DIP2B	Atg13
DCAF12L2	CUL3	Chchd4	DIP2C	Atg14
DCAF6	CUL4A	Chchd5	DIS3L	Atg16l1
DCN	CUTC	Chchd6	DLC1	Atg2a
DCPS	CUX1	Chchd7	DLEC1	Atg2b
DCTN1	CWC15	Chd4	DLG1	Atg3
DCTN2	CWC22	Cherp	DLGAP5	Atg4a
DCTN3	CXorf38	Chga	DLL1	Atg4b
DCTPP1	CYB5B	Chid1	DMPK	Atg5
DCUN1D1	CYB5R1	Chmp1a	DMTF1	Atg7
DCUN1D2	CYB5R3	Chmp1b2	DMTN	Atg9a
DCXR	CYBRD1	Chmp2a	DMXL1	Athl1
DDAH1	CYC1	Chmp2b	DNAH5	Atic
DDAH2	CYCS	Chmp4b	DNAJA1	Atl1
DDB1	CYLD	Chmp5	DNAJB1	Atl2
DDI2	DAAM2	Chordc1	DNAJB11	Atl3
DDOST	DAB2	Chp1	DNAJB12	Atm
DDRGK1	DAB2IP	Chpt1	DNAJB2	Atn1
DDT	DAP	Chtop	DNAJB3	Atox1
DDX1	DAPK2	Ciao1	DNAJB5	Atp11a
DDX17	DAXX	Ciapin1	DNAJB6	Atp11b
DDX39B	DBI	Cilp2	DNAJC16	Atp11c
DDX3X	DBN1	Cirbp	DNAJC3	Atp12a
DDX5	DBNDD1	Cisd1	DNAJC7	Atp13a1
DDX6	DBNL	Cisd2	DNAJC8	Atp13a2
DECR1	DBR1	Cisd3	DNHD1	Atp13a3
DEFA1	DBT	Ckap4	DNM1	Atp1a1
DEK	DCAF1	Ckap5	DOCK3	Atp1a2
DENR	DCAF10	Ckb	DOCK5	Atp1a3
DEPTOR	DCAF11	Ckm	DOLPP1	Atp1b1
DERA	DCAF5	Ckmt2	DPAGT1	Atp1b2
DES	DCAF6	Clasp1	DPP6	Atp1b3
DFFA	DCK	Clasp2	DPP7	Atp2a1
DGKZ	DCLK1	Clcc1	DPP9	Atp2a2
DGLUCY	DCP1A	Clcn1	DPYSL5	Atp2a3
DHCR24	DCP1B	Clcn7	DRG1	Atp2b1
DHCR7	DCPS	Clec10a	DRG2	Atp2b3
DHODH	DCTN2	Clec3b	DSC2	Atp2b4
DHRS4	DCTN4	Clic1	DSE	Atp2c1
DHRS7	DDA1	Clic4	DSG2	Atp5a1
DHRS7B	DDAH1	Clic5	DSG3	Atp5b
DHRS7C	DDB1	Clint1	DUS3L	Atp5c1
DHTKD1	DDHD1	Clip1	DUSP26	Atp5d
DHX15	DDHD2	Clns1a	DUSP27	Atp5e
DHX38	DDI2	Clpb	DVL1P1	Atp5f1
DHX9	DDOST	Clpp	DYNC1I1	Atp5h;Gm10250
DIABLO	DDT	Clptm1	DYNC1LI2	Atp5i;Atp5k
DIAPH1	DDX1	Clpx	DYNC2LI1	Atp5j
DIAPH2	DDX17	Clta	DYNLL1	Atp5j2
DIP2C	DDX20	Cltb	DYNLT1	Atp5l;Atp5l-ps1
DKC1	DDX21	Cltc	DYRK1A	Atp5o;Gm5436
DLAT	DDX23	Clu	DZIP1	Atp5s
DLD	DDX3X	Cluh	DZIP1L	Atp6ap1
DLST	DDX3Y	Clybl	EBF4	Atp6ap2
DMD	DDX42	Cma1	EBP	Atp6v0a1
DMTN	DDX51	Cmas	ECHDC1	Atp6v0a2
DNAJA2	DDX54	Cmbl	ECHDC2	Atp6v0c
DNAJA3	DDX59	Cmc1	EDC4	Atp6v0d1
DNAJA4	DECR1	Cmc2	EEF2K	Atp6v1a
DNAJB2	DEF8	Cmpk1	EEFSEC	Atp6v1b2
DNAJB4	DEK	Cmpk2	EEPD1	Atp6v1c1
DNAJB5	DENND1A	Cmya5	EFCAB13	Atp6v1d
DNAJB6	DENND1B	Cnbp	EFEMP2	Atp6v1e1
DNAJC11	DENND4A	Cndp2	EFTUD1	Atp6v1f
DNAJC19	DENND4B	Cnksr1	EFTUD2	Atp6v1g1
DNAJC7	DENND4C	Cnn1	EGFLAM	Atp6v1h
DNM1L	DENND5A	Cnn2	EGLN1	Atp7a
DNM2	DENND5B	Cnn3	EHBP1L1	Atp8a1
DNPEP	DENR	Cnot1	EHD3	Atp8b2
DNPH1	DEPDC5	Cnot3	EIF1	Atp9b
DOCK7	DEPTOR	Cnp	EIF1B	Atpaf1
DPH5	DES	Cnpy2	EIF2B2	Atpaf2
DPP3	DFFA	Coa3	EIF2B3	Atpbd4
DPP9	DGKI	COA4	EIF2B5	Atpif1
DPYSL2	DGKZ	Coa6	EIF3G	Atr
DPYSL3	DHCR7	Coa7	EIF3H	Atrn
DRG1	DHODH	Coasy	EIF3I	Atrx
DRG2	DHRS7	Cobl	EIF3M	Atxn1
DST	DHX16	Col11a1	EIF4E	Atxn10
DSTN	DHX29	Col12a1	EIF4E1B	Atxn2
DTD1	DHX36	Col14a1	EIF4E3	Atxn7l1
DTNA	DHX9	Col15a1	EIF4EBP1	Auh
DTNB	DIDO1	Col18a1	EIF4EBP2	Aup1
DTYMK	DIP2C	Col1a1	EIF4G3	Aurka
DUPD1	DIS3L2	Col1a2	ELMOD2	Aurkb
DUSP23	DISP2	Col22a1	EMC10	Aven
DUSP27	DKC1	Col3a1	EMC3	Avil
DUSP28	DLAT	Col4a1	EMCN	Avl9
DUSP3	DLC1	Col4a2	EMILIN3	Axin1
DUT	DLD	Col4a3	EMP3	Axl
DYNC1H1	DLG1	Col4a3bp	ENAH	Azgp1
DYNC1I2	DLG2	Col4a5	ENPP4	Azi1
DYNC1LI1	DLGAP3	Col5a1	EPB41L3	B2m
DYNC1LI2	DLGAP4	Col5a2	EPHX2	B3galnt2
DYNLL1	DLST	Col5a3	EPN1	B3galtl
DYNLL2	DMAP1	Col6a1	EPPK1	B3gat3
DYNLRB1	DMD	Col6a2	EPS15	B3gnt1
DYSF	DMTN	Col6a3	EPS15L1	B4galt5
EARS2	DMWD	Col6a6	ERBB3	B4galt7
ECH1	DMXL2	Colgalt1	ERC2	Baat1;Brat1
ECHDC1	DNAJA4	Commd3	ERGIC1	Babam1
ECHDC2	DNAJB2	Commd6	ERH	Bach1
ECHDC3	DNAJB4	Comp	ERLIN1	Bad
ECHS1	DNAJB6	Comt	ERMAP	Bag1
ECI1	DNAJC17	Copa	ERMN	Bag2
ECI2	DNAJC2	Copb1	ERMP1	Bag3
ECPAS	DNAJC21	Copb2	ERO1A	Bag5
EDF1	DNAJC5	Cope	ERVK-25	Bag6
EEA1	DNAJC9	Copg1	ESAM	Baiap2
EEF1A1	DNAL4	Copg2	ESF1	Baiap2l1
EEF1A2	DNM1	Cops2	EVPL	Bak1
EEF1B2	DNM1L	Cops3	EVPLL	Banf1
EEF1D	DNMBP	Cops4	EXOC2	Bap1
EEF1G	DNMT3A	Cops5	EXOC3L4	Basp1
EEF2	DNPH1	Cops6	EXOC4	Bax
EEF2K	DNTTIP1	Cops7a	EXOC8	Baz1a
EEFSEC	DOCK1	Cops7b	EXOG	Baz1b
EFEMP1	DOCK10	Cops8	EXOSC6	Baz2b
EFL1	DOCK4	Copz1	F2	Bbc3
EFTUD2	DOCK6	Coq10a	F8	Bbs1
EGLN1	DOCK7	Coq3	FABP7	Bbs2
EHBP1L1	DOCK9	Coq4	FAF1	Bbs4
EHD1	DOK1	Coq5	FAF2	Bbs9
EHD2	DOK3	Coq6	FAM114A2	BC005624
EIF1	DOK7	Coq7	FAM118B	BC006779
EIF1AX	DOPEY2	Coq9	FAM120A	BC017158
EIF2A	DPH1	Coro1a	FAM134B	BC018507
EIF2AK4	DPP9	Coro1b	FAM135A	BC027231
EIF2B1	DPY19L1	Coro1c	FAM160B1	BC048403
EIF2B3	DPYSL2	Coro6	FAM175B	Bcam
EIF2B5	DPYSL3	Coro7	FAM185A	Bcap29
EIF2S1	DPYSL4	Cotl1	FAM186B	Bcap31
EIF2S2	DST	Cox15	FAM192A	Bcar1
EIF2S3	DSTN	COX17	FAM208B	Bcar3
EIF3A	DTD1	Cox19	FAM21A	Bcas2
EIF3B	DTNA	Cox20	FAM49A	Bcas3
EIF3C	DTNBP1	Cox4i1	FAM71F1	Bcat1
EIF3D	DTWD2	Cox5a	FAM83C	Bcat2
EIF3E	DUSP27	Cox5b	FAM83D	Bccip
EIF3F	DUSP28	Cox6a1	FAM83H	Bche
EIF3G	DUSP3	Cox6a2	FAM90A1	Bckdha
EIF3H	DVL1	Cox6b1	FAM92A1	Bckdhb
EIF3I	DYNC1H1	Cox6c	FAM98A	Bckdk
EIF3J	DYNC1I2	Cox7a1	FAM98B	Bcl10
EIF3K	DYNC1LI1	Cox7a2	FAN1	Bcl2l13
EIF3L	DYNC1LI2	Cox7b	FANCI	Bcl6
EIF3M	DYRK1A	Cox7c	FASTKD2	Bcl7b
EIF4A1	DYRK2	Cp	FAU	Bcl7c
EIF4A2	DYSF	Cpa3	FBL	Bcl9l
EIF4A3	E2F8	Cpb2	FBLL1	Bclaf1
EIF4B	EBAG9	Cpe	FBN1	Bcs1l
EIF4E	EBF2	Cpn1	FBXL3	Bdh1
EIF4G1	ECI1	Cpn2	FBXO3	Bdh2
EIF4G2	EDC3	Cpne1	FBXO30	Becn1
EIF4H	EDC4	Cpne3	FBXO33	Best3
EIF5	EDF1	Cpox	FBXO38	Bet1l
EIF5A	EEF1A2	Cpped1	FBXO40	Bfar
EIF5B	EEF1B2	Cpq	FBXO6	Bgn
EIF6	EEF1D	Cps1	FCER1A	Bhlhb9
ELAVL1	EEF1G	Cpsf6	FDFT1	Bicc1
ELOB	EEF2	Cpsf7	FDX1	Bicd2
ELOC	EEF2K	Cpt1a	FEM1A	Bin1
EMC1	EEPD1	Cpt1b	FER1L5	Bin3
EMC2	EFHD2	Cpt2	FERMT1	Birc2
EMC4	EFNA2	Crat	FEZ2	Birc6
EMC7	EFNB1	Crbn	FGD4	Blmh
EMC8	EFR3A	Creld1	FGF1	Bloc1s1
EMD	EFR3B	Crem	FGGY	Bloc1s3
EML1	EGFR	Crip1	FHDC1	Blvra
EML2	EGLN1	Crip2	FHL2	Blvrb
ENAH	EHBP1	Crk	FILIP1	Blzf1
ENDOD1	EHBP1L1	Crkl	FITM2	Bmi1
ENDOG	EHD1	Crlf3	FKBP8	Bmp1
ENO1	EHD2	Crocc	FKBP9	Bmp2k
ENO2	EI24	Crot	FLII	Bmper
ENO3	EIF2A	Cryab	FLNA	Bmpr2
ENOPH1	EIF2AK4	Cryl1	FLYWCH2	Bms1
ENSA	EIF2B1	Cryz	FMN1	Bnc2
EPB41	EIF2B4	Cryzl1	FMO3	Bnip1
EPB41L2	EIF2B5	Cs	FMOD	Bnip2
EPB42	EIF2S2	Csde1	FMR1	Bnip3
EPHX1	EIF3A	Cse1l	FN3KRP	Bnip3l
EPHX2	EIF3B	Csk	FNDC1	Bod1
EPM2A	EIF3C	Csl	FNDC3A	Bod1l
EPN1	EIF3G	Csnk1a1	FNTA	Bola1
EPPK1	EIF3J	Csnk2a1	FNTB	Bola2
EPRS	EIF4B	Csnk2a2	FOLH1B	Bola3
EPS15	EIF4EBP1	Csnk2b	FOLR2	Bop1
EPS15L1	EIF4EBP2	Cspg4	FOXF1	Bpgm
ERAP1	EIF4EBP3	Csrp1	FOXM1	Bphl
ERGIC1	EIF4ENIF1	Csrp3	FREM2	Bpnt1
ERH	EIF4G1	Cst3	FRG1	Braf
ERI3	EIF4G2	Cstf2t	FRMD1	Brap
ERLIN1	EIF4G3	Ctage5	FRMD3	Brcc3
ERLIN2	EIF4H	Ctbp1	FSIP2	Brd1
ERMP1	EIF5	Ctbp2	FSTL4	Brd2
ERO1A	EIF5B	Ctc1	FUNDC1	Brd3
ERP29	EIF6	Ctnna1	FUS	Brd4
ERP44	ELAC2	Ctnnb1	FUT10	Brd7
ESD	ELF1	Ctnnbl1	FUT8	Brd8
ESYT1	ELFN1	Ctnnd1	FXR1	Brd9
ESYT2	ELMSAN1	Ctps1	FXR2	Bre
ETF1	ELOA	Ctsa	FYB	Bri3
ETFA	ELP4	Ctsb	FYTTD1	Bri3bp
ETFB	ELP5	Ctsc	G3BP2	Brix1
ETFDH	ELP6	Ctsd	G6PD	Brk1
ETHE1	EMC4	Ctsl	GABARAP	Brms1l
EXOC1	EMC8	Ctsz	GABRB1	Brox
EXOC8	EMCN	Cttn	GALNT10	Brp44
EZR	EMD	Cuedc1	GALNT12	Brp44l;Brp44l-ps
F12	EMILIN1	Cul1	GALP	Brpf1
F13A1	EMILIN3	Cul2	GALT	Bsdc1
F2	EML1	Cul3	GANC	Bsg
FABP3	EML3	Cul4a	GAPVD1	Bst2
FABP4	EML4	Cul5	GAR1	Btaf1
FABP5	ENAH	Cuta	GARS	Btbd1
FAF1	ENDOD1	Cwc15	GATB	Btbd11
FAH	ENDOG	Cyb5a	GATC	Btd
FAHD1	ENO1	Cyb5b	GATM	Btf3
FAHD2A	ENO2	Cyb5d2	GATSL2	Btf3l4
FAM114A2	ENO3	Cyb5r1	GBA2	Bub3
FAM129A	ENO4	Cyb5r3	GBP1	Bud13
FAM136A	ENPP4	Cyc1	GBP4	Bud31
FAM162A	ENSA	Cycs	GC	Bves
FAM210A	EPB41	Cyfip1	GCAT	BY080835
FAM210B	EPB41L1	Cygb	GCFC2	Bysl
FAM213A	EPB41L2	Cyp27a1	GDPD1	Bzw1
FAM49B	EPB41L3	Cyp4f39	GDPD4	Bzw2
FAM98A	EPB41L4A	Cyth1	GEM	C030046E11Rik;Kiaa1432
FARSA	EPB42	D10Jhu81e	GEMIN5	C130039O16Rik
FARSB	EPHX1	D17Wsu104e	GET4	C1galt1c1
FBL	EPN1	D1Pas1	GFAP	C1qb
FBLN1	EPRS	D2hgdh	GFOD1	C1qbp
FBLN2	EPS15	Dab2	GFPT1	C1qc
FBLN5	EPS15L1	Dad1	GGA2	C1qtnf3
FBN1	EPS8	Dag1	GGACT	C1qtnf9
FBN2	ERAP1	Dak	GGPS1	C1ra;C1rb
FBP1	ERBB3	Dap	GGT5	C1rl
FBP2	ERBIN	Dap3	GHDC	C1s;C1sa
FBXO40	ERC1	Dapk2	GIGYF2	C2cd2
FBXO6	ERF	Dars	GIMAP4	C2cd2l
FDPS	ERICH1	Dazap1	GIT1	C2cd3
FDX1	ERLIN1	Dbi	GIT2	C3
FDXR	ERLIN2	Dbn1	GJA10	C330007P06Rik;Gm8181
FECH	ERMAP	Dbnl	GJB6	C330027C09Rik;Kiaa1524
FEM1A	ERO1A	Dbt	GK3P	C4b
FER	ESD	Dcaf6	GLG1	C5
FERMT2	ESYT1	Dcaf7	GLRX3	C530008M17Rik;Kiaa1211
FERMT3	ESYT2	Dcaf8	GLTP	C5ar1
FGA	ETFA	Dcakd	GMPPA	C78339
FGB	EVL	Dck	GMPPB	C8a
FGG	EXOC1	Dcn	GMPR2	C8b
FH	EXOC2	Dcps	GMPS	C8g
FHL1	EXOC4	Dctn1	GNA11	C9
FHL2	EXOC7	Dctn2	GNA12	Ca13
FHL3	EXOC8	Dctn3	GNA13	Ca14
FHOD1	EYA4	Dctpp1	GNAI1	Ca2
FIS1	EZR	Dcun1d1	GNAL	Ca3
FITM1	F11R	Dcun1d2	GNAO1	Ca4;Car4
FKBP1A	FAAP100	Ddah1	GNAS	Ca5b
FKBP3	FABP3	Ddah2	GNG5	Cab39
FKBP4	FAF1	Ddb1	GNL1	Cab39l
FKBP5	FAH	Ddi2	GNPAT	Cabin1
FKBP8	FAM110B	Ddost	GOLGA4	Cables1
FLAD1	FAM111B	Ddrgk1	GOLGB1	Cables2;Gm6190
FLII	FAM117B	Ddt	GOLIM4	Cachd1
FLNA	FAM122A	Ddx1	GOLPH3	Cacna1s
FLNB	FAM122B	Ddx17	GORASP2	Cacna2d1
FLNC	FAM124B	Ddx18	GOSR2	Cacna2d2
FLOT1	FAM126B	Ddx19a	GPC1	Cacnb1
FLOT2	FAM129A	Ddx19b	GPN1	Cacnb3
FMC1	FAM129B	Ddx21	GPR179	Cacng1
FN1	FAM133B	Ddx23	GPR50	Cacng6
FN3K	FAM13A	Ddx24	GPR98	Cacul1;2700078E11Rik
FN3KRP	FAM160A1	Ddx28	GPT2	Cacybp
FNDC3A	FAM160A2	Ddx39	GRHL1	Cad
FNTA	FAM171A1	Ddx39b	GRIA1	Cadm3
FPGS	FAM184A	Ddx3x	GRK6	Cadm4
FRMD3	FAM189A2	Ddx3y	GSE1	Calcoco1
FSCN1	FAM227A	Ddx42	GSK3A	Calcrl
FSD2	FAM234A	Ddx46	GSK3B	Cald1
FTH1	FAM241B	Ddx47	GSPT2	Calhm2
FTL	FAM49A	Ddx5	GSS	Calm1;Calml3
FUBP1	FAM53B	Ddx54	GSTT2	Calr
FUNDC2	FAM53C	Ddx59	GTF2I	Calu
FUS	FAM90A5P	Ddx6	GTF2IRD2	Camk1
FXR1	FAM91A1	Decr1	GTF3C1	Camk2a
FXR2	FANCM	Dek	GTPBP1	Camk2b
FYCO1	FARP1	Dennd1a	GTPBP6	Camk2d
FZR1	FARSB	Dennd4b	GUCY1A2	Camk2g
G3BP1	FAT3	Dennd4c	GUCY2D	Camkk1
G3BP2	FAXC	Denr	GUCY2F	Camlg
GAA	FBL	Depdc6	GUF1	Camsap1
GABARAP	FBLN2	Derl1	GUSB	Camsap2
GALK1	FBN1	Des	GYS2	Cand1
GALM	FBP2	Dffa	H2AFX	Cand2
GALT	FBRSL1	Dgat1	HAAO	Cant1
GAMT	FBXL20	Dgkz	HABP4	Canx
GANAB	FBXO10	Dhdh	HACD3	Cap1
GANC	FBXO40	Dhodh	HAT1	Cap2
GAPDH	FBXO42	Dhrs1	HAX1	Capg
GARS	FBXO6	Dhrs11	HBE1	Capn1
GART	FCER1G	Dhrs4	HBS1L	Capn2
GBE1	FCHO2	Dhrs7	HBZ	Capn3
GBP2	FCRL5	Dhrs7b	HCCS	Capn5
GC	FECH	Dhrs7c	HCFC1	Capn6
GCDH	FERMT2	Dhx15	HCFC2	Capn7
GCLC	FERMT3	Dhx37	HDAC4	Capns1
GCLM	FEZ2	Dhx9	HDDC2	Caprin1
GCN1	FGA	Diablo	HDDC3	Capza1
GCSH	FGD4	Diap1	HDHD3	Capza2
GDE1	FGD5	Dip2c	HEATR1	Capzb
GDI1	FGF13	Dis3l2	HECTD3	Car1;Ca1
GDI2	FGFBP3	Dlat	HELZ2	Card6
GET4	FH	Dld	HERC1	Carhsp1
GFAP	FHL1	Dlg1	HERC4	Carkd
GFM1	FHL3	Dlgap4	HEXB	Carm1
GFPT1	FHOD1	Dlst	HIAT1	Carns1
GGACT	FHOD3	Dmd	HIF1AN	Cars
GGCT	FILIP1	Dmtn	HIF3A	Cars2
GHITM	FILIP1L	Dnah9	HIGD2A	Casc3
GIGYF1	FIP1L1	Dnaja1	HINT3	Casc4
GIGYF2	FITM1	Dnaja2	HIP1R	Casd1
GIMAP4	FKBP15	Dnaja3	HIRA	Cask
GIPC1	FKBP1A	Dnaja4	HIST1H1A	Caskin2
GLIPR2	FKBP3	Dnajb1	HIST1H2BA	Casp12
GLO1	FKBP5	Dnajb11	HIST2H2AB	Casp2
GLOD4	FKBP8	Dnajb12	HKDC1	Casp3
GLRX	FKRP	Dnajb2	HLA-A	Casp6
GLRX3	FLCN	Dnajb4	HLA-B	Casp7
GLRX5	FLII	Dnajb5	HLA-C	Casp8
GLUD1	FLNA	Dnajb6	HLA-DPA1	Casq1
GLUL	FLNB	Dnajc11	HLA-DRB1	Casq2
GMFB	FLNC	Dnajc13	HLCS	Cast
GMPPB	FLYWCH2	Dnajc19	HMBS	Casz1
GMPR	FMNL1	Dnajc25	HMCN1	Cat
GMPR2	FN1	Dnajc3	HMCN2	Cav1
GMPS	FN3K	Dnajc7	HMGA1	Cav2
GNA11	FNBP1	Dnajc8	HMGB1P1	Cav3
GNA13	FNBP1L	Dnajc9	HMGCLL1	Cbl
GNAI2	FNBP4	Dnase1l1	HMGN2	Cblb
GNAI3	FNDC1	Dnm1l	HMGN3	Cbll1
GNAS	FNDC3A	Dnm2	HMGN4	Cbr1
GNB1	FNDC3B	Dnpep	HMGN5	Cbr2
GNB2	FNIP1	Dnph1	HMOX1	Cbr3
GNG12	FOXJ2	Dock1	HMOX2	Cbr4
GNL1	FOXK1	Dock2	HNRNPA1L2	Cbwd1
GNPDA1	FOXK2	Dock7	HNRNPC	Cbx1
GNPDA2	FOXO1	Dohh	HNRNPCL1	Cbx2
GOLIM4	FOXO3	Dpep1	HNRNPF	Cbx3
GOLPH3	FOXO4	Dph5	HNRNPLL	Cbx4
GORASP2	FPGS	Dpp3	HNRNPM	Cbx5
GOSR2	FRMD3	Dpp7	HNRNPUL1	Cbx6
GOT1	FRMD4A	Dpp8	HNRNPUL2	Cbx8
GOT2	FRMD8	Dpp9	HOMER1	Cc2d1a
GPAT3	FRMPD1	Dpt	HOMER2	Cc2d1b
GPC1	FRMPD3	Dpy19l1	HOMER3	Cc2d2a
GPD1	FRY	Dpy30	HOOK2	Ccar1
GPD1L	FRYL	Dpysl2	HOXB8	Ccbl1
GPD2	FSD1L	Dpysl3	HPR	Ccbl2
GPHN	FSD2	Drg1	HS1BP3	Ccdc101
GPI	FTH1	Drg2	HSBP1L1	Ccdc102a
GPR89A	FUNDC2	Dst	HSDL1	Ccdc104
GPS1	FXR1	Dstn	HSP90AA5P	Ccdc115
GPT	FXR2	Dtd1	HSP90AB2P	Ccdc117
GPT2	FXYD1	Dtna	HSP90AB3P	Ccdc124
GPX1	FYCO1	Dupd1	HSP90B2P	Ccdc127
GPX3	FYTTD1	Dusp13	HSPA12A	Ccdc132
GPX4	FZD6	Dusp23	HSPA12B	Ccdc134
GRB2	FZR1	Dusp27	HSPA1A	Ccdc137
GRHPR	G3BP1	Dusp28	HSPA1L	Ccdc141
GRPEL1	G3BP2	Dusp3	HSPA4L	Ccdc167;1110021J02Rik
GRSF1	GAB1	Dut	HSPBP1	CCDC171;4930473A06Rik
GRWD1	GAB2	DXS254E	HSPG2	Ccdc22
GSE1	GANAB	Dym	HTATIP2	Ccdc23
GSN	GAPDH	Dync1h1	HTATSF1	Ccdc25
GSPT1	GAPVD1	Dync1i2	HYDIN	Ccdc28a
GSR	GARS	Dync1li1	HYPK	Ccdc28b
GSS	GART	Dync1li2	ICMT	Ccdc40
GSTK1	GATAD2B	Dynll1	IFITM3	Ccdc43
GSTM1	GBE1	Dynll2	IFNB1	Ccdc47
GSTM2	GBF1	Dynlrb1	IFNG	Ccdc50
GSTM3	GCFC2	Dynlrb2	IFNW1	Ccdc51
GSTM4	GCLC	Dynlt1	IFT172	Ccdc53
GSTO1	GCOM1	Dysf	IGBP1	Ccdc56
GSTP1	GDAP1	E330034G19Rik	IGF2R	Ccdc58
GSTT1	GDI1	Ears2	IGFBP5	Ccdc59
GSTT2B	GDI2	Ebna1bp2	IGFBP6	Ccdc6
GSTZ1	GDPD1	Ech1	IGFN1	Ccdc69
GTF2I	GEMIN4	Echdc1	IGHG3	Ccdc75
GUCY1B1	GEMIN5	Echdc3	IGHV4OR15-8	Ccdc80
GYG1	GFAP	Echs1	IGKV4-1	Ccdc83
GYPA	GFPT1	Eci1	IGLC7	Ccdc86
GYPC	GGA2	Eci2	IGLL1	Ccdc88a
GYS1	GGA3	Ecm1	IGSF22	Ccdc88c
H1F0	GGCT	Ecm29	IGSF9B	Ccdc9
H1FX	GGT7	Ecsit	IL10RB	Ccdc90a
H2AFB1	GIGYF1	Edc4	ILDR1	Ccdc90b
H2AFY	GIGYF2	Edf1	ILKAP	Ccdc91
H2AFY2	GIT1	Eea1	ILVBL	Ccdc93
H2AFZ	GIT2	Eef1a1	IMMT	Ccdc97
H3F3A	GLCCI1	Eef1a2	IMPAD1	Ccm2
H6PD	GLI2	Eef1b	IMPDH1	Ccnd3
HACD1	GLO1	Eef1d	INA	Ccndbp1
HACD3	GLOD4	Eef1e1	INPP5D	Ccnh
HADH	GLRX	Eef1g	INPPL1	Ccnk
HADHA	GLUD1	Eef2	IPO8	Ccnl1
HADHB	GLYR1	Efemp1	IPP	Ccnt1
HAGH	GNAS	Efhd2	IQCH	Ccnt2
HARS	GNG12	Eftud1	IQSEC3	Ccny
HARS2	GNL1	Eftud2	IRF8	Ccnyl1
HBA1	GNPDA1	EG433182	IRGQ	Ccpg1
HBB	GOLGA4	Egfr	IRS4	Ccs
HBD	GOLIM4	Egln1	ISCU	Ccsmst1
HBE1	GOLPH3	Ehbp1	IST1	Cct2
HBS1L	GON4L	Ehbp1l1	ISX	Cct3
HCCS	GORASP1	Ehd1	ITGA1	Cct4
hCG_1984214	GORASP2	Ehd2	ITGA6	Cct5
hCG_2043426	GOSR1	Ehd4	ITGA7	Cct6a
HDDC2	GOT1	Ei24	ITGB1BP2	Cct7
HDGF	GOT2	Eif1	ITGB3	Cct8
HDGFL2	GP1BA	Eif1ad	ITIH5	Ccz1
HDHD2	GP1BB	Eif1ax	ITSN1	Cd109
HDHD3	GPALPP1	Eif2a	ITSN2	Cd14
HDHD5	GPAM	Eif2b1	JAGN1	Cd151
HDLBP	GPAT3	Eif2b2	JAKMIP3	Cd163
HEBP1	GPATCH2	Eif2b3	JAM3	Cd180
HEBP2	GPATCH8	Eif2b4	KALRN	Cd200
HECTD1	GPCPD1	Eif2b5	KANK3	Cd209d
HECTD3	GPD1	Eif2s1	KATNAL2	Cd248
HERC1	GPHN	Eif2s2	KAZN	Cd276
HERC4	GPI	Eif2s3x	KBTBD12	Cd2ap
HEXB	GPKOW	Eif2s3y	KCMF1	Cd2bp2
HGH1	GPN1	Eif3a	KCNAB1	Cd34
HHATL	GPR173	Eif3b	KCNH3	Cd36
HIBADH	GPRC5B	Eif3c	KCNS1	Cd38
HIBCH	GPRC5C	Eif3d	KDELC1	Cd44
HINT1	GPRIN3	Eif3e	KDM1B	Cd47
HINT2	GPS1	Eif3f	KDSR	Cd48
HINT3	GPSM2	Eif3g	KHDRBS1	Cd55;Cd55b;Daf2
HIST1H1B	GPSM3	Eif3h	KHK	Cd59a
HIST1H1C	GPT	Eif3i	KHSRP	Cd5l
HIST1H1D	GPX1	Eif3j	KIAA0196	Cd63
HIST1H1E	GRAMD1A	Eif3j1	KIAA0319	Cd74
HIST1H2BN	GRAP2	Eif3k	KIAA0556	Cd81
HIST1H3A	GRASP	Eif3l	KIAA1161	Cd82
HIST1H4A	GRB10	Eif3m	KIAA1217	Cd9
HIST2H2BC	GRIA4	Eif4a1	KIAA1407	Cd93
HK1	GRIP2	Eif4a2	KIAA1462	Cd97
HK2	GRIPAP1	Eif4b	KIAA1671	Cd99l2
HLA-A	GRK5	Eif4e	KIAA2018	Cdadc1
HLA-B	GRSF1	Eif4e3	KIF15	Cdan1
HLA-DPB1	GSE1	Eif4ebp1	KIF17	Cdc123
HLA-DRA	GSK3A	Eif4g1	KIF1A	Cdc16
HLA-DRB1	GSK3B	Eif4g2	KIF1B	Cdc23
HMBS	GSN	Eif4g3	KIF27	Cdc27
HMCN2	GSR	Eif4h	KIF3A	Cdc34
HMGA1	GSS	Eif5	KIF4B	Cdc37
HMGB1	GSTM2	Eif5a	KIF5C	Cdc37l1
HMGB2	GSTM3	Eif5b	KIF7	Cdc40
HMGCL	GSTO1	Eif6	KLB	Cdc42
HMGN2	GSTP1	Elac2	KLC1	Cdc42bpa
HMGN3	GSTZ1	Elavl1	KLC2	Cdc42bpb
HMOX1	GTF2F1	Elmo1	KLF5	Cdc42bpg
HMOX2	GTF2I	Elmod2	KLHDC3	Cdc42ep1
HNRNPA0	GTF3C2	Emc1	KLHL21	Cdc42ep2
HNRNPA1	GTPBP1	Emc10	KLHL22	Cdc42ep4
HNRNPA2B1	GTPBP4	Emc2	KLHL24	Cdc5l;Gm9049
HNRNPA3	GTSF1L	Emc3	KLRG2	Cdc73
HNRNPAB	GUCY1A2	Emc4	KPNA1	Cdh11
HNRNPC	GYG1	Emc6	KPNA5	Cdh13
HNRNPD	GYPA	Emc7	KPNA6	Cdh15
HNRNPDL	GYS1	Emc8	KRT24	Cdh2
HNRNPF	H1F0	Emd	KRT26	Cdh5
HNRNPH1	H1FX	Emg1	KRT84	Cdipt
HNRNPH2	H3F3A	Eml1	KRTAP15-1	Cdk1
HNRNPH3	HABP4	Eml2	L1CAM	Cdk11b
HNRNPK	HACD1	Endod1	L3HYPDH	Cdk12
HNRNPL	HACD3	Endog	LACE1	Cdk13
HNRNPLL	HADHA	Eno1	LACTB2	Cdk14
HNRNPM	HAGH	Eno2	LAGE3	Cdk16
HNRNPR	HARS	Eno3	LAMA1	Cdk17
HNRNPU	HARS2	Enoph1	LAMA3	Cdk18
HNRNPUL1	HBA1	Enpep	LAMA4	Cdk19
HNRNPUL2	HBB	Enpp4	LAMB1	Cdk2
HOMER1	HBD	Ensa	LAMB2	Cdk4
HOMER3	HBP1	Entpd1	LAMC1	Cdk5
HOOK3	HCFC1	Entpd2	LAMP1	Cdk5rap1
HP	HDAC1	Epb4.1	LAMP2	Cdk5rap2
HP1BP3	HDAC2	Epb4.1l2	LANCL2	Cdk5rap3
HPR	HDAC4	Epb4.2	LARP1	Cdk6
HPRT1	HDAC5	Epdr1	LARP1B	Cdk7
HPX	HDAC7	Epha2	LARP4B	Cdk9
HRC	HDGF	Ephx1	LARS2	Cdkal1
HRG	HDGFL2	Ephx2	LBR	Cdkn1a
HS1BP3	HDGFL3	Epm2a	LCLAT1	Cdkn1b
HSCB	HDHD5	Epm2aip1	LCMT1	Cdkn2aip
HSD17B10	HDLBP	Epn1	LCN10	Cdkn2aipnl
HSD17B12	HEATR6	Epn2	LDHAL6A	Cdnf
HSD17B4	HEBP2	Eprs	LDHAL6B	Cdon
HSD17B8	HECTD1	Eps15	LEKR1	Cdr2
HSDL1	HECTD4	Eps15l1	LEMD2	Cds2
HSDL2	HECW2	Epx	LETMD1	Cdsn
HSP90AA1	HELZ	Erap1	LGALS4	Cdv3
HSP90AB1	HERC1	Erbb2ip	LHPP	Cdyl
HSP90AB4P	HERC2	Erc1	LIAS	Cebpb
HSP90B1	HEXIM2	Ergic1	LIG4	Cebpg
HSPA12A	HGH1	Ergic3	LILRB1	Cebpz
HSPA1B	HHATL	Erh	LIMA1	Cecr5
HSPA1L	HIBADH	Erlin2	LIMCH1	Celf1
HSPA2	HIC1	Ero1l	LIMS3L	Celf2
HSPA4	HIDE1	Erp29	LIN7A	Cenpb
HSPA4L	HINT1	Erp44	LINC01006	Cenpc1
HSPA5	HIP1R	Esam	LIPE	Cenpe
HSPA8	HIPK1	Esd	LMNB1	Cenpf
HSPA9	HIPK3	Esyt1	LMNB2	Cenpi
HSPB1	HIRIP3	Esyt2	LMNTD2	Cenpl
HSPB2	HIST1H1E	Etf1	LMO7	Cenpp
HSPB3	HIST1H2BN	Etfa	LMOD1	Cenpt
HSPB6	HIST1H4A	Etfb	LMOD2	Cenpv
HSPB7	HIVEP2	Etfdh	LOC285556	Cep104
HSPB8	HK1	Ethe1	LPIN1	Cep128;4930534B04Rik
HSPBP1	HLCS	Evi5	LRCH3	Cep135
HSPD1	HMCN2	Evl	LRG1	Cep170
HSPE1	HMGA1	Ewsr1	LRGUK	Cep192
HSPE1-MOB4	HMGB1	Exoc1	LRP1	Cep290
HSPG2	HMGN1	Exoc4	LRPAP1	Cep350
HSPH1	HMGN3	Exoc7	LRRC14B	Cep41
HTATSF1	HMOX1	Exoc8	LRRC2	Cep55
HUWE1	HNRNPA0	Exosc1	LRRC31	Cep68
HYOU1	HNRNPA1	Exosc4	LRRC39	Cep76
HYPK	HNRNPA2B1	Ezr	LRRC40	Cep85;Ccdc21
IAH1	HNRNPA3	F10	LRRC43	Cep95;Ccdc45
IARS	HNRNPC	F13a1	LRRC59	Cept1
IARS2	HNRNPD	F2	LRRC9	Cercam
IBA57	HNRNPDL	Fabp3	LRRCC1	Cers1
ICAM2	HNRNPH1	Fabp4	LRRFIP1	Cers2;Lass2
IDE	HNRNPK	Fabp5	LRRFIP2	Cers5
IDH1	HNRNPL	Faf1	LRRK2	Ces1b
IDH2	HNRNPU	Faf2	LRSAM1	Ces1c
IDH3A	HNRNPUL2	Fahd1	LSM1	Ces1d
IDH3B	HOMER3	Fahd2	LSM12	Ces1h;Ces1e;Ces1f
IDH3G	HOOK3	Fam114a2	LSM14B	Ces2g
IDI1	HOXC10	FAM120A	LSM4	Cfd
IDI2	HP1BP3	Fam129a	LSM6	Cfdp1
IGBP1	HRC	Fam129b	LSM7	Cfh
IGF2R	HRNR	Fam134b	LSM8	Cfhr2
IGFN1	HS1BP3	Fam136a	LTBP4	Cfi
IGHA1	HSD17B8	Fam160a2	LUC7L2	Cfl1;Gm6180
IGHG1	HSF1	Fam162a	LY75	Cfl2
IGHG2	HSP90AA1	Fam175b	LYRM4	Cfp
IGHG3	HSP90AB1	Fam192a	LYRM9	Cggbp1
IGHG4	HSP90B1	Fam21	MACF1	Cgnl1
IGHM	HSPA12B	Fam210a	MAGEB2	Cgref1
IGHV1-18	HSPA14	Fam213a	MAGI3	Cgrrf1
IGHV1-46	HSPA1B	Fam213b	MAGOHB	Chac2
IGHV3-13	HSPA2	Fam49b	MAGT1	Chad
IGHV3-43D	HSPA4	Fam63a	MAP1A	Chaf1a
IGHV3-7	HSPA5	Fam63b	MAP1B	Chaf1b
IGHV3OR16-9	HSPA8	Fam98b	MAP1LC3A	Champ1
IGKC	HSPA9	Fam98c	MAP1S	Chchd10
IGKV2-40	HSPB1	Fars2	MAP2K4	Chchd3
IGKV4-1	HSPB2	Farsa	MAP2K7	Chchd4
IGLC3	HSPB3	Farsb	MAP3K19	Chchd5
IGLC7	HSPB6	Fasn	MAP3K3	Chchd6
IGLL5	HSPB7	Fau	MAP3K4	Chchd7
IGLV2-8	HSPB8	Fbl	MAP4	Chd1
IGLV3-19	HSPBP1	Fbln1	MAP9	Chd1l
ILF2	HSPE1-MOB4	Fbln2	MAPK3	Chd2
ILF3	HSPG2	Fbln5	MAPK8	Chd3
ILK	HSPH1	Fbn1	MAPK8IP3	Chd4
ILVBL	HTATSF1	Fbn2	MAPK9	Chd5
IMMT	HTRA2	Fbp2	MAPKAPK2	Chd6
IMPA1	HUWE1	Fbxo22	MAPKAPK3	Chd7
IMPA2	HYPK	Fbxo3	MAPKAPK5	Chd8
IMPACT	IAH1	Fbxo40	MASTL	Cherp
IMPDH2	IBTK	Fbxo6	MAT1A	Chid1
INPP1	ICE1	Fcho2	MAT2B	Chkb
INPP4B	ICK	Fdps	MBLAC2	Chm
INPPL1	IDH1	Fdx1	MBNL1	Chmp1a
IPO4	IDH2	Fdx1l	MCF2L	Chmp1b1
IPO5	IDI2	Fdxr	MCFD2	Chmp1b2
IPO7	IFI16	Fech	MCM7	Chmp2a
IPO9	IFNGR2	Fem1aa	MCM8	Chmp2b
IQGAP1	IFT172	Fen1	MCRS1	Chmp3
IRGQ	IFT43	Fermt2	MECP2	Chmp4b
IRS1	IGDCC4	Fermt3	MED12L	Chmp5
ISCA2	IGF2R	Fetub	MED13L	Chmp6
ISCU	IGFBP1	Fga	MEF2A	Chmp7
ISOC1	IGFN1	Fgb	MEMO1	Chn2
ISOC2	IKBKB	Fgf13	METAP1	Chordc1
IST1	IL16	Fgg	METTL13	Chp1;1500003O03Rik
ITGA1	IL6ST	Fh	METTL7B	Chpf
ITGA5	ILF3	Fhl1	MFAP2	Chpt1
ITGA6	IMMT	Fhl3	MFAP4	Chrna1
ITGA7	IMPA1	Fhod1	MFF	Chrnb1
ITGAV	IMPDH2	Fhod3	MFN1	Chrnd
ITGB1	ING4	Filip1	MGMT	Chrng
ITGB1BP2	ING5	Fis1	MIB2	Chst12
ITGB3	INPP5D	Fitm1	MIC13	Chst14
ITIH1	INPP5J	Fkbp10	MICU1	Chst15
ITIH2	INPP5K	Fkbp15	MIEN1	Chst7
ITIH4	INPPL1	Fkbp1a	MINK1	Chsy1
ITIH5	INTS1	Fkbp2	MIS18BP1	Chtf18
ITPA	INTS3	Fkbp3	MITF	Chuk
ITPR3	IPO7	Fkbp4	MKNK1	Ciao1
ITSN1	IQGAP1	Fkbp5	MLLT10	Ciapin1
IVD	IQGAP2	Fkbp8	MLLT4	Cic
JAGN1	IQSEC1	Fkbp9	MLLT6	Cilp
JCHAIN	IQSEC2	Flad1	MLST8	Cilp2
JMJD7	IREB2	Flii	MME	Cirbp
JPH1	IRF2BP1	Flna	MMGT1	Cirh1a
JPH2	IRF2BP2	Flnb	MMP16	Cisd1
JPT1	IRF2BPL	Flnc	MMP21	Cisd2
JSRP1	IRF3	Flot1	MMP28	Cisd3
KARS	IRS1	Flot2	MMRN2	Cit
KBTBD12	IRS2	Fmo1	MNT	Ciz1
KCMF1	ISCU	Fmo2	MOB1A	Ckap4
KCNJ11	ISOC1	Fmod	MOB2	Ckap5
KCNN4	ISOC2	Fn1	MOB4	Ckb
KCTD12	IST1	Fn3k	MOCS2	Ckm
KHSRP	ITGA5	Fn3krp	MOGS	Ckmt1
KIAA1671	ITGB1	Fnbp1	MON2	Ckmt2
KIF1BP	ITGB7	Fndc1	MORC3	Clasp1
KIF1C	ITIH2	Fnta	MRC1	Clasp2
KIF26B	ITPKB	Fntb	MROH2B	Clasrp
KIF5B	ITPR1	Frrs1l	MRPL2	Clcc1
KLC1	ITPR3	Fscn1	MRPL3	Clcn1
KLHL31	ITSN1	Fsd2	MRPL30	Clcn2
KLHL40	ITSN2	Fth1	MRPL33	Clcn3
KLHL41	IVNS1ABP	Ftl1	MRPL34	Clcn5
KNG1	IWS1	Ftsj3	MRPL38	Clcn6
KPNA1	JAGN1	Fubp1	MRPL42	Clcn7
KPNA3	JCAD	Fubp3	MRPL51	Cldnd1;Cldn25
KPNA4	JMJD1C	Fuk	MRPS12	Clec10a
KPNA6	JMY	Fundc1	MRPS2	Clec11a
KPNB1	JPH1	Fundc2	MRPS30	Clec16a
KRT1	JPH2	Fus	MSI1	Clec2d
KRT10	JPT1	Fxn	MSL1	Clec3b
KRT13	JPT2	Fxr1	MSRB3	Clic1
KRT18	JSRP1	Fxr2	MSS51	Clic4
KRT2	JUND	Fxyd1	MT1A	Clic5
KRT5	JUP	Fyco1	MT-CO3	Clint1
KRT8	KALRN	Fyttd1	MTERF4	Clip1
KRT84	KANK1	G3bp1	MTFR1L	Clip2
KRT9	KANK2	G3bp2	MTHFD1L	Clk3
KTN1	KANK3	G6pdx	MTHFS	Clk4
KYAT1	KANSL1	Gaa	MTM1	Cln3
KYAT3	KAT7	Gab1	MTMR14	Cln5
L2HGDH	KATNA1	Gabarap	MTMR6	Cln6
L3HYPDH	KBTBD11	Gabarapl1	MT-ND3	Cln8
LACTB	KBTBD12	Gabpa	MT-ND6	Clns1a
LACTB2	KCNA5	Gabpb1	MTOR	Clpb
LAGE3	KCNAB1	Gadd45gip1	MTR	Clpp
LAMA2	KCNB1	Galk1	MTRF1L	Clptm1
LAMA4	KCNJ11	Galk2	MUC16	Clptm1l
LAMA5	KCNJ2	Galt	MUCL1	Clpx
LAMB1	KCNK13	Ganab	MVP	Clstn1
LAMB2	KCNN3	Ganc	MXRA7	Clta
LAMC1	KCNN4	GAPDH	MYBBP1A	Cltb
LAMP1	KCNQ5	Gapvd1	MYBPHL	Cltc
LAMP2	KCNT1	Gars	MYCBP	Clu
LANCL1	KCTD10	Gart	MYH10	Cluap1
LANCL2	KCTD12	Gatad2b	MYH7B	Clybl
LAP3	KCTD13	Gatb	MYLK	Cma1
LARS	KCTD2	Gatc	MYLK3	Cmas
LARS2	KCTD3	Gbas	MYO18B	Cmbl
LASP1	KDM1A	Gbe1	MYO1A	Cmc1
LCMT1	KDM1B	Gbf1	MYO1B	Cmc2;2310061C15Rik
LCP1	KDM2A	Gbp2	MYO3A	Cmklr1
LDB3	KDM3B	Gbp7	MYO7A	Cmpk1
LDHA	KDM5C	Gbp9	MYOC	Cmpk2
LDHB	KHDRBS1	Gc	MYOZ3	Cmtm6
LDHD	KHSRP	Gcat	NAA10	Cmtm7
LEMD2	KIAA0408	Gcdh	NAA30	Cmya5
LETM1	KIAA0930	Gclm	NACA	Cnbp
LGALS1	KIAA1109	Gcn1l1	NACA2	Cndp2
LGALS3	KIAA1143	Gcsh	NAPG	Cnep1r1;Tmem188
LGALS3BP	KIAA1217	Gda	NAPRT	Cnih
LGALSL	KIAA1549L	Gde1	NARFL	Cnih4
LHPP	KIAA1671	Gdi1	NARS2	Cnksr1
LIMCH1	KIDINS220	Gdi2	NASP	Cnksr3
LIMS1	KIF13A	Gdpd1	NAV3	Cnn1
LIMS4	KIF13B	Get4	NBAS	Cnn2
LMAN1	KIF15	Gfer	NCAM2	Cnn3
LMAN2	KIF16B	Gfm1	NCAPD3	Cnnm2
LMCD1	KIF1B	Gfm2	NCK1	Cno
LMNA	KIF1C	Gfpt1	NCK2	Cnot1
LMNB1	KIF20B	Ggact	NCLN	Cnot10
LMNB2	KIF21A	Ggct	NCOR1	Cnot2
LMO7	KIF24	Ggps1	NDUFA1	Cnot3
LMOD1	KIF3A	Ggt5	NDUFAF1	Cnot4
LMOD2	KIF5A	Ghdc	NDUFAF5	Cnot7
LMOD3	KIF5B	Ghitm	NDUFAF7	Cnp
LNPEP	KLC1	Gid8	NDUFB2	Cnpy2
LNPK	KLC2	Gigyf2	NDUFC1	Cnpy3
LONP1	KLC3	Gimap4	NEBL	Cnpy4
LPA	KLC4	Gipc1	NEGR1	Cnrip1
LPCAT3	KLF3	Git1	NEK6	Cnst
LPIN1	KLHL22	Git2	NEK8	Cntfr
LPP	KLHL31	Glg1	NEUROG3	Coa5
LRP1	KLHL41	Glo1	NFIA	Coasy
LRPAP1	KMT2D	Glod4	NFIB	Cobl
LRPPRC	KNG1	Glrx	NFIC	Cobll1
LRRC2	KPNA3	Glrx2	NFIX	Cobra1
LRRC20	KPNA4	Glrx3	NGLY1	Cog1
LRRC39	KRT1	Glrx5	NHEJ1	Cog2
LRRC47	KRT84	Gls	NID1	Cog3
LRRFIP1	KSR1	Glud1	NID2	Cog4
LRRFIP2	KTN1	Glul	NIF3L1	Cog5
LRRK2	KXD1	Gm10229	NIPSNAP1	Cog6
LSM14A	LACTB2	Gm10250	NISCH	Cog7
LSM2	LAMA1	Gm16039	NKAPP1	Cog8
LSMEM2	LAMA2	Gm16314	NKPD1	Coil
LSS	LAMA4	Gm17430	NKTR	Col11a1
LTA4H	LAMB1	Gm17669	NLRC4	Col12a1
LTF	LAMTOR1	Gm20390	NLRP12	Col14a1
LUC7L2	LANCL1	Gm20425	NME8	Col15a1
LUM	LANCL2	Gm20736	NMNAT1	Col16a1
LYPLA1	LARP1	Gm27029	NMT1	Col18a1
LYPLA2	LARP1B	Gm3839	NOLC1	Col1a1
LYPLAL1	LARP4	Gm5145	NOMO1	Col1a2
LYZ	LARP4B	Gm5938	NOP56	Col22a1
LZIC	LARP7	Gm7075	NOP58	Col2a1
M6PR	LAS1L	Gm8994	NOS1	Col3a1
MACO1	LASP1	Gm9493	NOSTRIN	Col4a1
MACROD1	LAT	Gm9755	NPDC1	Col4a2
MAGED2	LATS2	Gmfb	NPEPPSL1	Col4a3bp
MAGOHB	LAYN	Gmppa	NPTN	Col4a5
MAGT1	LBH	Gmppb	NR5A2	Col4a6
MAIP1	LBR	Gmpr	NRBP1	Col5a1
MAN2C1	LBX1	Gmps	NSL1	Col5a2
MANF	LCP1	Gna11	NT5C2	Col5a3
MAOA	LDB3	Gna13	NT5DC1	Col6a1
MAOB	LDHA	Gnai2	NTMT1	Col6a2
MAP1B	LDLRAP1	Gnaq	NUB1	Col6a3
MAP1S	LEMD2	Gnas	NUBP1	Col6a5
MAP2K1	LENG1	Gnb1	NUCB1	Col6a6
MAP2K2	LEO1	Gnb2	NUDC	Colec12
MAP2K3	LETM2	Gnb2l1	NUDCD3	Commd1
MAP2K4	LGALS1	Gng11	NUDT10	Commd10
MAP2K6	LGALSL	Gng12	NUDT16	Commd2
MAP4	LIG3	Gng2	NUDT19	Commd3
MAP7	LIMA1	Gng5	NUDT9	Commd4
MAP7D1	LIMCH1	Gnl2	NUFIP2	Commd5
MAPK1	LIMD1	Gnl3	NUP133	Commd6
MAPK12	LIMK1	Gnpat	NUP155	Commd7
MAPK14	LIMS4	Gnpda1	NUP205	Commd8
MAPK3	LINC00305	Golga3	NUP54	Commd9
MAPK9	LIPE	Golga4	NUP62	Comp
MAPKAPK2	LLGL1	Golga5	NUP93	Comt
MAPKAPK3	LMCD1	Golim4	NXPE3	Comtd1
MAPRE1	LMF1	Golph3	OBSCN	Copa
MAPRE2	LMNA	Gorasp2	OBSL1	Copb1
MAPRE3	LMNB1	Gosr2	OGDHL	Copb2
MAPT	LMNB2	Got1	OPA3	Cope
MARCKS	LMO7	Got2	OR7C1	Copg1;Copg
MARS	LMOD1	Gpam	OSBPL3	Copg2
MAT2A	LMOD2	Gpc1	OSBPL6	Cops2
MAT2B	LMOD3	Gpcpd1	OSBPL9	Cops3
MATR3	LMTK2	Gpd1	OTUB2	Cops4
MAVS	LNPEP	Gpd1l	OTUD4	Cops5
MB	LNPK	Gpd2	OTUD6B	Cops6
MBNL1	LNX1	Gphn	OXR1	Cops7a
MCAM	LPAR1	Gpi	P4HA1	Cops7b
MCCC1	LPIN1	Gpihbp1	PABPC1L	Cops8
MCCC2	LPIN2	Gpld1	PABPC4L	Copz1
MCEE	LRBA	Gps1	PABPN1	Copz2
MCFD2	LRCH3	Gpt	PACSIN2	Coq10a
MCTS1	LRCH4	Gpt2	PADI1	Coq3
MCU	LRIG1	Gpx1	PAIP1	Coq4
MDH1	LRMDA	Gpx3	PAK1	Coq5
MDH2	LRP1	Gpx4	PARG	Coq6
MDP1	LRPAP1	Grap2	PARK2	Coq7
ME1	LRRC2	Grb14	PARL	Coq9
ME2	LRRC20	Grb2	PARP14	Coro1a
ME3	LRRC28	Grhpr	PARS2	Coro1b
MECP2	LRRC3B	Grpel1	PATL1	Coro1c
MECR	LRRC41	Grsf1	PBDC1	Coro2b
MEMO1	LRRC47	Grwd1	PC	Coro6
METAP1	LRRFIP1	Gsk3a	PCBP4	Coro7
METAP2	LRRFIP2	Gsk3b	PCDH12	Cotl1
METTL26	LRRK2	Gsn	PCDHA5	Cox11
METTL7A	LRSAM1	Gspt1	PCDHGA10	Cox15
MFAP4	LRWD1	Gsr	PCDHGA6	Cox17
MFAP5	LSM12	Gss	PCDHGB7	Cox18
MFF	LSM14A	Gsta4	PCIF1	Cox19
MFN1	LSMEM1	Gstk1	PCLO	Cox20
MFN2	LSP1	Gstm1	PCM1	Cox4i1
MGLL	LSR	Gstm2	PCMTD1	Cox5a
MGMT	LTA4H	Gstm4	PCNA	Cox5b
MGST2	LTB4R	Gstm5	PCNP	Cox6a1
MGST3	LTBP1	Gsto1	PCOLCE	Cox6a2
MIA2	LTBP2	Gstp1	PCTP	Cox6b1
MIB2	LUC7L2	Gstt1	PDCD10	Cox6c
MICU1	LUZP1	Gstt3	PDCD6	Cox7a1
MICU2	LYAR	Gstz1	PDCL3	Cox7a2
MIEF2	LYSMD2	Gtf2f2	PDE12	Cox7a2l
MIF	LYSMD3	Gtf2i	PDE4D	Cox7c;Gm3386
MIPEP	M6PR	Gtpbp1	PDE6A	Cp
MLEC	MACF1	Gtpbp4	PDK1	Cpa3
MLF1	MACO1	Gucy1b3	PDK3	Cpb2
MLF2	MACROD1	Guf1	PDLIM2	Cpd
MLIP	MAD1L1	Guk1	PDZD7	Cpe
MLYCD	MAD2L1BP	Gyg	PDZD8	Cpeb3;Cpeb2
MMAB	MADD	Gypc	PECAM1	Cpeb4
MME	MAF1	Gys1	PEF1	Cplx2;Cplx1
MMRN2	MAG	H1f0	PEG3	Cpm
MMS19	MAGED1	H1fx	PELO	Cpn1
MOB1B	MAGED2	H2afv	PELP1	Cpn2
MOCS2	MAGT1	H2afx	PEPD	Cpne1
MP68	MALT1	H2afy	PES1	Cpne2
MPC2	MANF	H2-D1	PET117	Cpne3
MPI	MAOB	H2-K1	PEX1	Cpne6
MPO	MAP1A	H2-Ke6	PEX14	Cpne8;Cpne5
MPP1	MAP1B	H2-L	PEX19	Cpox
MPRIP	MAP1S	H3f3a	PEX26	Cpped1
MPST	MAP2	H6pd	PF4V1	Cpq
MRC2	MAP2K1	Hadh	PFDN1	Cpsf1
MRI1	MAP2K2	Hadha	PFDN6	Cpsf2
MRPL1	MAP2K3	Hadhb	PFKFB1	Cpsf3
MRPL10	MAP2K4	Hagh	PFKFB2	Cpsf3l
MRPL11	MAP3K2	Hars	PFKP	Cpsf4
MRPL12	MAP3K4	Hars2	PGGT1B	Cpsf6
MRPL14	MAP3K5	Hat1	PGLS	Cpsf7
MRPL15	MAP3K7	Hba-a1	PGM2L1	Cpt1a
MRPL16	MAP3K8	HBB1	PGM3	Cpt1b
MRPL21	MAP4	Hbbt1	PHF21B	Cpt1c
MRPL22	MAP4K2	Hbs1l	PHF5A	Cpt2
MRPL24	MAP4K3	Hc	PHKG2	Cr1l
MRPL28	MAP4K4	Hccs	PHLDB1	Cradd
MRPL3	MAP7	Hcfc1	PHYH	Crat
MRPL30	MAP7D1	Hcls1	PHYHD1	Crbn
MRPL37	MAPK1	Hdac1	PHYKPL	Crcp
MRPL39	MAPK10	Hdac2	PI4K2B	Creb1
MRPL4	MAPK12	Hddc2	PIAS4	Crebbp
MRPL40	MAPK14	Hdgf	PICALM	Creg1
MRPL41	MAPK3	Hdgfrp2	PIEZO1	Creld1
MRPL43	MAPK8IP3	Hdhd2	PIGK	Creld2
MRPL44	MAPK9	Hdlbp	PIGT	Crim1
MRPL46	MAPKAP1	Heatr2	PIK3CA	Crip1
MRPL49	MAPKAPK2	Heatr6	PIKFYVE	Crip2
MRPL50	MAPKAPK3	Hectd1	PIP4K2A	Cript
MRPL55	MAPKBP1	Herc1	PIP4K2C	Crk
MRPL9	MAPRE1	Herc2	PIPSL	Crkl
MRPS14	MAPRE2	Herc4	PITPNA	Crlf1
MRPS15	MAPRE3	Hexim1	PITPNB	Crlf3
MRPS18A	MAPT	Hgs	PKIA	Crls1
MRPS18B	MARCKS	Hhatl	PKLR	Crnkl1
MRPS2	MARCKSL1	Hibadh	PLA2G12A	Crocc
MRPS22	MARF1	Hibch	PLA2G4C	Crot
MRPS23	MARK1	Hif1an	PLAGL2	Crtap
MRPS25	MARK2	Hint1	PLBD2	Crtc1
MRPS26	MARK3	Hint2	PLCD3	Crtc2
MRPS27	MAST2	Hint3	PLEKHA1	Crtc3
MRPS31	MAST3	Hip1	PLEKHD1	Cry2
MRPS33	MAST4	Hist1h1a	PLEKHF1	Cryab
MRPS34	MATR3	Hist1h1b	PLEKHH3	Crybg3
MRPS35	MAVS	Hist1h1c	PLGLA	Cryl1
MRPS36	MB	Hist1h1d	PLGLB1; PLGLB2	Crym
MRPS5	MB21D2	Hist1h1e	PLRG1	Cryz
MRPS6	MBD1	Hist1h2af	PLS1	Cryzl1
MRPS7	MBLAC1	Hist1h2ah	PLVAP	Cs
MRPS9	MBP	Hist1h2al	PLXNB1	Csad
MSI2	MCC	Hist1h2bj	PM20D2	Csda
MSN	MCF2L	Hist1h2bm	PMF1	Csdc2
MSRB2	MCM2	Hist1h3e	PML	Csde1
MT1G	MCM3	Hist1h3i	PODXL	Cse1l
MTAP	MCM3AP	Hist2h4	POLB	Csf1
MT-ATP8	MCMBP	Hist3h2ba	POLD1	Csf1r
MTCH2	MCRIP2	Hk1	POLE3	Csgalnact1
MT-CO1	MCTS1	Hk2	POLK	Csgalnact2
MT-CO2	MDFIC	Hk3	POLN	Csk
MT-CO3	MDH1	Hlcs	POLR2B	Csl
MT-CYB	MDH2	Hm	POLR2E	Csnk1a1
MTDH	ME1	Hm13	POLR2H	Csnk1d
MTFP1	MECP2	Hmbs	POLR2K	Csnk1e
MTFR1L	MED1	Hmgb1	POLR2M	Csnk1g1
MTHFD1	MED12	Hmgb2	PON1	Csnk1g2
MTIF2	MED14	Hmgb3	POP7	Csnk1g3
MTM1	MED9	Hmgcl	POSTN	Csnk2a1
MT-ND1	MEF2A	Hmgcs1	POTEA	Csnk2a2
MT-ND2	MEF2C	Hmgn2	POTEE	Csnk2b
MT-ND4	MEF2D	Hmgn3	POTEF	Cspg4
MT-ND5	MEMO1	Hmgn5	POTEI	Csrp1
MTOR	MEN1	Hmox1	POTEKP	Csrp2
MTPN	MEOX2	Hmox2	PPAPDC3	Csrp3
MTR	MEPCE	Hn1l	PPCS	Cst3
MTRR	MESD	Hnmt	PPFIA1	Cstb
MTX1	MET	Hnrnpa0	PPIAL4A	Cstf1
MTX2	METAP2	Hnrnpa1	PPID	Cstf2
MUT	METTL1	Hnrnpa2b1	PPIE	Cstf2t
MVB12B	METTL22	Hnrnpa3	PPM1B	Cstf3
MVD	METTL7A	Hnrnpab	PPM1F	Ctage5
MVP	MFF	Hnrnpc	PPM1G	Ctbp1
MXRA7	MFGE8	Hnrnpd	PPME1	Ctbp2
MYBPC1	MFN2	Hnrnpdl	PPOX	Ctbs
MYBPC2	MGMT	Hnrnpf	PPP1R12A	Ctc1
MYBPH	MGST3	Hnrnph1	PPP1R14A	Ctcf
MYDGF	MIA2	Hnrnph2	PPP1R1B	Ctdnep1
MYH1	MIA3	Hnrnph3	PPP1R2P1	Ctdp1
MYH10	MIB2	Hnrnpk	PPP1R3D	Ctdsp1
MYH11	MICAL3	Hnrnpl	PPP2CB	Ctdspl2
MYH13	MICALL1	Hnrnpll	PPP2R3A	Ctf1
MYH14	MIEF1	Hnrnpm	PPP2R5E	Ctgf
MYH15	MIGA2	Hnrnpr	PPP3CC	Cth
MYH16	MINDY1	Hnrnpu	PPP5D1	Ctif
MYH2	MINK1	Hnrnpul1	PPP6C	Ctnna1
MYH3	MIOS	Hnrnpul2	PPP6R1	Ctnna2
MYH4	MITF	Homer1	PPT1	Ctnna3
MYH6	MKL2	Hook3	PPTC7	Ctnnal1
MYH7	MKNK1	Hp1bp3	PREPL	Ctnnb1
MYH7B	MKNK2	Hprt	PRKAB1	Ctnnbl1
MYH8	MKRN2	Hpx	PRKAG3	Ctnnd1
MYH9	MLF1	Hras	PRKAR2B	Ctps1
MYL1	MLF2	Hrc	PRKCDBP	Ctps2
MYL10	MLIP	Hrg	PRMT1	Ctr9
MYL12A	MLLT1	Hrsp12	PRNP	Ctsa
MYL2	MLLT6	Hscb	PROB1	Ctsb
MYL3	MLX	Hsd17b10	PRPF19	Ctsc
MYL4	MLXIPL	Hsd17b4	PRPF40A	Ctsd
MYL5	MME	Hsdl1	PRPF6	Ctsf
MYL6	MMGT1	Hsdl2	PRPH	Ctsh
MYL6B	MMTAG2	Hsp90aa1	PRPSAP1	Ctsl1
MYL9	MN1	Hsp90ab1	PRPSAP2	Ctso
MYLK	MOCS2	Hsp90b1	PRR33	Ctss
MYLK2	MOCS3	Hspa12b	PRRC1	Ctsz
MYLPF	MON1A	Hspa1b	PRRC2A	Cttn
MYO18A	MON2	Hspa2	PRSS12	Cttnbp2nl
MYO18B	MORC2	Hspa4	PRUNE	Ctu1
MYO1B	MP68	Hspa4l	PSIP1	Ctu2
MYO1C	MPDZ	Hspa5	PSMA8	Cuedc1
MYO9B	MPI	Hspa8	PSMD5	Cuedc2
MYOC	MPP1	Hspa9	PSMD8	Cul1
MYOF	MPST	Hspb1	PSME4	Cul2
MYOM1	MRC2	Hspb2	PSMF1	Cul3
MYOM2	MRPL1	Hspb3	PSMG1	Cul4a
MYOM3	MRPS16	Hspb6	PSMG3	Cul4b
MYORG	MRPS36	Hspb7	PTDSS2	Cul5
MYOT	MRVI1	Hspb8	PTER	Cul7
MYOZ1	MSN	Hspbp1	PTGR1	Cul9
MYOZ2	MSRB3	Hspd1	PTMA	Cuta
MYOZ3	MTA1	Hspe1	PTMS	Cutc
MYPN	MT-CYB	Hspg2	PTP4A1	Cux1
NAA10	MTDH	Hsph1	PTPN1	Cwc15
NAA15	MTF2	Htatsf1	PTPN11	Cwc22;OTTMUSG00000013393;Gm13695
NAA30	MTFR1	Htra2	PTRH2	Cwc27
NAA50	MTFR1L	Huwe1	PTRHD1	Cwf19l1
NACA	MTHFD1	Hyou1	PURB	Cwf19l2
NACAP1	MTM1	Hypk	PWP1	Cxcl12
NADK2	MTMR10	Iars	PXN	Cxx1b
NAE1	MTMR14	Iars2	QKI	Cxxc1
NAGK	MTMR3	Iba57	R3HCC1	Cyb561d2
NAMPT	MTOR	Ict1	RAB15	Cyb5a;Cyb5
NANS	MTSS1	Ide	RAB1A	Cyb5b
NAP1L1	MTSS1L	Idh1	RAB26	Cyb5d2
NAP1L4	MTUS1	Idh2	RAB33B	Cyb5r1
NAPA	MTX2	Idh3a	RAB3D	Cyb5r3
NAPG	MTX3	Idh3b	RAB3GAP1	Cyb5r4
NAPRT	MUL1	Idh3g	RAB3GAP2	Cyc1
NARS	MUM1L1	Ifggd1	RAB4A	Cyfip1
NARS2	MVB12B	Ifi204	RAB5C	Cygb
NAXD	MVD	Ifitm2	RAB9B	Cyhr1
NAXE	MVP	Igbp1	RABGAP1	Cyld
NBAS	MXRA7	Igf2bp1	RABGEF1	Cyp20a1
NCAM1	MYBBP1A	Igf2bp3	RABGGTA	Cyp27a1
NCEH1	MYBPC1	Igf2r	RABGGTB	Cyp2d22
NCK1	MYBPC2	Igfn1	RABL3	Cyp2e1
NCL	MYBPH	Ighg1	RABL6	Cyp2u1
NCLN	MYCBP2	Ighg2b	RAD50	Cyp39a1
NCOA2	MYCT1	Ighm	RAD54L2	Cyp4b1
NDRG1	MYEF2	Igkc	RAE1	Cyp4f16;Gm9705
NDRG2	MYH1	Igkv8-30	RALB	Cyp4f39
NDRG3	MYH10	Ik	RANBP2	Cyp51a1
NDUFA10	MYH11	Ikbkap	RANBP3	Cyr61
NDUFA11	MYH13	Ikbkg	RANGAP1	Cyth1
NDUFA12	MYH14	Ikzf1	RAP1GDS1	Cyth2
NDUFA13	MYH15	Il19	RASA4B	D10Jhu81e
NDUFA2	MYH2	Il1rap	RB1CC1	D10Wsu52e
NDUFA3	MYH3	Ilf2	RBBP7	D11Wsu47e
NDUFA4	MYH4	Ilf3	RBCK1	D11Wsu99e
NDUFA5	MYH6	Ilk	RBFOX1	D14Ertd449e
NDUFA6	MYH7	Ilkap	RBKS	D17h6s53e
NDUFA7	MYH7B	Ilvbl	RBM12B	D17H6S56E-5
NDUFA8	MYH8	Immt	RBM14	D17Wsu104e
NDUFA9	MYH9	Impa1	RBM17	D17Wsu92e
NDUFAB1	MYL1	Impact	RBM20	D1Bwg0212e
NDUFAF2	MYL12A	Impad1	RBM24	D2hgdh
NDUFAF3	MYL2	Impdh2	RBM25	D2Wsu81e
NDUFAF4	MYL3	Inmt	RBM3	D3Ertd751e
NDUFAF6	MYLK	Inpp1	RBM39	D4Ertd22e
NDUFAF7	MYLK2	Inppl1	RBM42	D4Wsu53e
NDUFB1	MYLK3	Insr	RBM48	D6Wsu163e
NDUFB10	MYLPF	Ipo4	RCC2	D8Ertd738e
NDUFB11	MYMX	Ipo5	RCL1	D8Ertd82e;Sgk223
NDUFB3	MYO18A	Ipo7	RDH14	D9Ertd402e
NDUFB4	MYO18B	Ipo9	RECQL	Daam1
NDUFB5	MYO1C	Iqgap1	REEP1	Daam2
NDUFB6	MYO1F	Iqgap2	REPIN1	Dab2
NDUFB7	MYO9B	Irf2bpl	RER1	Dab2ip
NDUFB8	MYOC	Irgq	REV3L	Dad1
NDUFB9	MYOM1	Irs1	REXO2	Dag1
NDUFC2	MYOM2	Isca2	RFK	Daglb
NDUFS1	MYOM3	Iscu	RFTN1	Dak
NDUFS2	MYOT	Isg15	RGL2	Dalrd3
NDUFS3	MYOZ1	Isoc1	RGL3	Dap3
NDUFS4	MYOZ2	Isoc2a	RGN	Dapk2
NDUFS5	MYOZ3	Ist1	RGS22	Dapk3
NDUFS6	MYPN	Itfg3	RHOC	Dars
NDUFS7	MYPOP	Itga1	RIF1	Dars2
NDUFS8	MZT2A	Itga6	RILP	Daxx
NDUFV1	MZT2B	Itga7	RILPL1	Dazap1
NDUFV2	N4BP1	Itgav	RIN3	Dbi
NDUFV3	NAA10	Itgb1	RNF114	Dbndd2
NEB	NAA30	Itgb1bp2	RNF125	Dbnl
NEDD4	NAB2	Itgb4	RNF170	Dbr1
NEDD4L	NACA	Itih1	RNF181	Dbt
NEDD8-MDP1	NADK2	Itih2	RNF40	Dcaf11
NEK7	NAE1	Itih3	RNF5	Dcaf13
NEK9	NAF1	Itih4	RNMTL1	Dcaf5
NEMF	NAGK	Itih5	ROBO3	Dcaf6
NENF	NANS	Itm2b	ROCK2	Dcaf7
NES	NAP1L1	Itpa	RP2	Dcaf8
NEU3	NAP1L4	Itsn1	RPA3	Dcakd
NEXN	NAPRT	Ivd	RPF2	Dcbld2
NFATC1	NARS	Ivns1abp	RPL10L	Dchs1
NGLY1	NASP	Jagn1	RPL13A	Dclk1
NHLRC2	NAT16	Jmy	RPL13AP3	Dcn
NID1	NAT6	Jph1	RPL18A	Dcp1a
NID2	NAV1	Jph2	RPL29	Dcp1b
NIF3L1	NAXD	Jsrp1	RPL3	Dcp2
NIPSNAP2	NAXE	Kank2	RPL34	Dcps
NIPSNAP3A	NBAS	Kank3	RPL35A	Dctn1
NIPSNAP3B	NBEA	Kars	RPL36	Dctn2
NIT1	NBEAL1	Katnal2	RPL36A	Dctn3
NIT2	NBEAL2	Kcmf1	RPL36AL	Dctn4
NLN	NCBP1	Kcna7	RPL37	Dctn5
NLRX1	NCBP2	Kcnc4	RPL39P5	Dctn6
NME1-NME2	NCBP3	Kcnj11	RPL3L	Dctpp1
NMNAT1	NCF2	Kcnmb4os2	RPS10P5	Dcun1d1;Tes3-ps
NMNAT3	NCF4	Kctd12	RPS26P11	Dcun1d2
NMT1	NCK1	Kdm1a	RPS27	Dcxr
NNT	NCK2	Kera	RPS3A	Dda1
NOL3	NCKAP5L	Khdrbs1	RPS6KA1	Ddah1
NOLC1	NCKIPSD	Khk	RPS6KA2	Ddah2
NOMO3	NCL	Khsrp	RPTOR	Ddb1
NONO	NCOA1	Kiaa1161	RRAGA	Ddc
NOP2	NCOA2	Kiaa1429	RRAGC	Ddhd1
NOP56	NCOA5	Kiaa1671	RRM2B	Ddhd2
NOP58	NCOA7	Kif13b	RRP1	Ddi2
NOS1	NCOR1	Kif15	RRS1	Ddo
NPEPL1	NCOR2	Kif1b	RSPH1	Ddost
NPEPPS	NDE1	Kif1c	RSPO3	Ddr2
NPLOC4	NDRG1	Kif21a	RSRC2	Ddrgk1
NPM1	NDRG2	Kif2a	RTEL1	Ddt
NQO2	NDRG4	Kif5b	RUNX1	Ddx1
NRAP	NDUFA6	Klc1	RWDD1	Ddx10
NRBP1	NDUFAB1	Klc2	RWDD4	Ddx17
NRDC	NDUFB1	Klc4	RYR1	Ddx18
NSDHL	NDUFB10	Klhl22	RYR2	Ddx19a
NSF	NDUFB11	Klhl28	S100A16	Ddx19b
NSFL1C	NDUFB4	Klhl30	SAA4	Ddx20
NSUN2	NDUFB5	Klhl31	SACM1L	Ddx21
NT5C	NDUFB7	Klhl40	SAE1	Ddx23
NT5C1A	NDUFB8	Klhl41	SAG	Ddx24
NT5C2	NDUFC1	Klk15	SAP18	Ddx26b
NT5C3A	NDUFS1	Klkb1	SART1	Ddx27
NT5DC1	NDUFS3	Kng1	SART3	Ddx28
NTMT1	NDUFS4	Kpna1	SBF1	Ddx31
NTPCR	NDUFS5	Kpna2	SCAF4	Ddx39a;Ddx39
NUBP2	NDUFV3	Kpna3	SCAMP1	Ddx39b
NUBPL	NEB	Kpna4	SCAMP4	Ddx3x;D1Pas1
NUCB1	NECAP2	Kpna6	SCFD2	Ddx3y
NUDC	NEDD1	Kpnb1	SCMH1	Ddx4
NUDCD2	NEDD4	Krt31	SCN2A	Ddx41
NUDCD3	NEDD4L	Krt33a	SCO2	Ddx42
NUDT16	NEK1	Krt33b	SCRIB	Ddx46
NUDT16L1	NEK4	Krt76	SCRN2	Ddx47
NUDT2	NEK7	Krt81	SDE2	Ddx49
NUDT3	NEK9	Ksr1	SDF2	Ddx5
NUDT9	NELFA	Kti12	SDHAF3	Ddx50
NUMA1	NELFB	Ktn1	SDHAF4	Ddx51
NUTF2	NELFE	L2hgdh	SDSL	Ddx52
NXN	NEMF	Lace1	SEC13	Ddx54
OBSCN	NES	Lactb	SEC16A	Ddx55
OBSL1	NETO2	Lactb2	SEC23IP	Ddx56
OCIAD1	NEU3	Lama2	SEC24B	Ddx58
OGA	NEXN	Lama4	SEC61A1	Ddx59
OGDH	NF1	Lama5	SEC62	Ddx6
OGN	NF2	Lamb1	SEC63	Decr1
OLA1	NFATC1	Lamb2	SEH1L	Degs1
OPA1	NFATC2	Lamc1	SEL1L	Dek
OPA3	NFATC3	Lamp1	SEL1L3	Dennd1a
OPLAH	NFATC4	Lamp2	SELO	Dennd1b
OPTN	NFIA	Lamtor1	SEMG1	Dennd2a
ORC4	NFIB	Lancl1	SEMG2	Dennd4a
ORM1	NFIC	Lap3	SENP3	Dennd4b
ORM2	NFIX	Larp1	SEPHS1	Dennd4c
OSBP	NFRKB	Larp4	SEPHS2	Dennd5a
OSBPL1A	NFXL1	Larp4b	SERF2	Dennd5b
OSBPL6	NFYA	Lars	SERINC1	Denr
OSBPL9	NGEF	Lars2	SERPINA2	Depdc5
OSGEP	NGFR	Lasp1	SERPINA4	Deptor
OTUB1	NHEJ1	Lbr	SERPINA5	Dera
OXA1L	NHSL2	Lca5	SERPINA6	Derl1
OXCT1	NIF3L1	Lck	SERPINB2	Derl2
OXR1	NIPBL	Lclat1	SERPINB9	Derp6;Rai12
OXSM	NKAP	Lcmt1	SERPINF2	Des
OXSR1	NME1-NME2	Lcp1	SERPINH1	Desi2;Pppde1
P4HB	NMNAT1	Ldb3	SETD3	Dfna5
PA2G4	NMT1	Ldha	SETX	Dgat1
PABPC1	NNT	Ldhb	SF1	Dgcr14
PABPC4	NOC2L	Ldhd	SF3A2	Dgcr8
PACS1	NOL3	Lemd2	SF3B1	Dgka
PACSIN2	NOLC1	Letm1	SF3B2	Dgkd
PACSIN3	NONO	Lgals1	SF3B5	Dgke
PADI2	NOP2	Lgals3	SFXN3	Dgkz
PAFAH1B1	NOP56	Lgals9	SFXN4	Dguok
PAFAH1B3	NOP58	Lgalsl	SGPL1	Dhcr24
PAICS	NOS1	Lgmn	SH2D3C	Dhcr7
PAIP1	NOS3	Lhpp	SH2D4B	Dhdds
PAK1	NOSTRIN	Lias	SH3GLB2	Dhdh
PAK2	NPDC1	Lifr	SH3KBP1	Dhfr
PALLD	NPEPPS	Limch1	SHANK2	Dhodh
PALMD	NPM1	Limd1	SHC1	Dhps
PANK4	NPM2	Lims1	SHOC2	Dhrs1
PANX1	NQO2	Lin7c	SIGLEC1	Dhrs11
PARK7	NR2C1	Lman1	SIK3	Dhrs13
PARP1	NR2E3	Lman2	SLC16A1	Dhrs3
PARVA	NR3C1	Lman2l	SLC16A3	Dhrs4
PARVB	NR3C2	Lmbrd1	SLC20A2	Dhrs7
PBDC1	NR4A1	Lmcd1	SLC22A20	Dhrs7b
PBXIP1	NR4A3	Lmna	SLC25A10	Dhrs7c
PCBD1	NRAP	Lmnb1	SLC25A13	Dhrsx
PCBD2	NRBP1	Lmnb2	SLC25A15	Dhtkd1
PCBP1	NRBP2	Lmo7	SLC25A24	Dhx15
PCBP2	NRDC	Lmod2	SLC25A46	Dhx16
PCBP3	NSD1	Lmod3	SLC27A1	Dhx29
PCCA	NSF	Lnp	SLC29A1	Dhx30
PCCB	NSFL1C	Lnpep	SLC2A5	Dhx32
PCDH1	NSMCE3	Lonp1	SLC35F6	Dhx33
PCMT1	NSUN2	Lpin1	SLC39A9	Dhx34
PCMTD1	NSUN5P2	Lpl	SLC3A2	Dhx35
PCNA	NT5C	Lpp	SLC44A2	Dhx36
PCNP	NT5C1A	Lrba	SLC9A3R2	Dhx37
PCYOX1	NT5C2	Lrg1	SLIT3	Dhx38
PCYT1A	NT5C3A	Lrp1	SLTM	Dhx57
PCYT2	NUBP1	Lrpap1	SMAD1	Dhx8
PDAP1	NUCB1	Lrpprc	SMAP	Dhx9
PDCD10	NUCKS1	Lrrc16a	SMARCC1	Diablo
PDCD5	NUDC	Lrrc2	SMARCC2	Diap1;Diaph1
PDCD6IP	NUDT12	Lrrc20	SMC1A	Diap2;Diaph2
PDCL3	NUFIP2	Lrrc39	SMC3	Dicer1
PDE4D	NUMA1	Lrrc47	SMG6	Dido1
PDF	NUMB	Lrrc57	SMIM12	Diexf
PDHA1	NUMBL	Lrrc59	SMIM13	Dimt1
PDHB	NUP107	Lrrfip1	SMS	Dip2a
PDHX	NUP133	Lrrfip2	SMTN	Dip2b
PDIA3	NUP153	Lsm1	SMTNL1	Dip2c
PDIA4	NUP155	Lsm12	SMTNL2	Dirc2
PDIA6	NUP160	Lsm14a	SMYD2	Dis3
PDK1	NUP188	Lsm2	SMYD5	Dis3l
PDK2	NUP214	Lsm3	SNAP23	Dis3l2
PDK4	NUP35	Lsm4	SNAP29	Dkc1
PDLIM1	NUP50	Lsm6	SNCG	Dlat
PDLIM2	NUP58	Lsm8	SNF8	Dlc1
PDLIM3	NUP88	Lsmem1	SNRNP200	Dld
PDLIM5	NUP98	Lsp1	SNRNP70	Dlg1
PDLIM7	OBSCN	Lta4h	SNRPA	Dlg3
PDP1	OBSL1	Ltbp4	SNRPB	Dlg5
PDPR	OCIAD1	Luc7l	SNRPB2	Dlgap4
PDX1	ODF3L1	Luc7l2	SNRPC	Dlst
PDXK	OGA	Luc7l3	SNRPD2	Dmap1
PDXP	OGFR	Lum	SNRPF	Dmd
PEA15	OLA1	Lxn	SNRPGP15	Dmpk
PEBP1	OPA1	Ly6c1	SNUPN	Dmxl1
PEBP4	OPLAH	Lyar	SNW1	Dmxl2
PECAM1	OPTN	Lypla1	SNX1	Dnaja1
PELO	OR4S1	Lypla2	SNX12	Dnaja2
PEPD	OR51B6	Lyrm4	SNX18	Dnaja3
PERM1	OR6B3	Lyrm5	SNX27	Dnaja4
PEX19	ORAI1	Lyrm7	SNX5	Dnajb1
PF4	ORC3	Lzic	SNX6	Dnajb11
PFAS	OSBP	M6pr	SNX9	Dnajb12
PFDN2	OSBPL11	Macf1	SOD3	Dnajb14
PFDN4	OSBPL1A	Macrod1	SORBS2	Dnajb2
PFDN5	OSBPL5	Mad2l1	SORBS3	Dnajb4
PFDN6	OSBPL6	Mad2l1bp	SORD	Dnajb5
PFKFB1	OSBPL7	Magi1	SPAG7	Dnajb6
PFKFB2	OSTM1	Magohb	SPARC	Dnajb9
PFKL	OTOA	Magt1	SPATA20	Dnajc1
PFKM	OTUB1	Man2a2	SPATS2L	Dnajc10
PFN1	OTUD1	Man2c1	SPECC1L	Dnajc11
PFN2	OTUD4	Manbal	SPEG	Dnajc13
PGAM1	OTUD5	Manf	SPG7	Dnajc15
PGAM2	OTUD7B	Maoa	SPPL2A	Dnajc16
PGAM5	OXR1	Maob	SPTBN2	Dnajc17
PGD	OXSR1	Map1a	SRA1	Dnajc18
PGGT1B	P2RY2	Map1lc3b	SRCAP	Dnajc19;Gm15118
PGK1	P2RY8	Map1s	SRF	Dnajc2
PGK2	P4HB	Map2k1	SRM	Dnajc21
PGLS	PABPC4	Map2k2	SRP14	Dnajc24
PGM1	PABPN1	Map2k3	SRP68	Dnajc25
PGM2	PACS1	Map2k4	SRP72	Dnajc28
PGM2L1	PACS2	Map2k6	SRPR	Dnajc3
PGM3	PACSIN3	Map3k7cl	SRRM2	Dnajc30
PGM5	PADI2	Map4	SRSF10	Dnajc4
PGP	PAFAH1B2	Map4k4	SRSF2	Dnajc5
PGRMC1	PAFAH1B3	Map4k5	SRSF4	Dnajc7
PGRMC2	PAGE4	Map7d1	SRSF7	Dnajc8
PHB	PAGR1	Mapk1	SSB	Dnajc9
PHB2	PAICS	Mapk12	SSR1	Dnal1
PHGDH	PAIP1	Mapk14	SSR3	Dnase1l1
PHKA1	PAK1	Mapk3	SSRP1	Dnase2;Dnase2a
PHKB	PAK2	Mapk8	ST7	Dnlz
PHKG1	PAK4	Mapk8ip3	STAG3	Dnm1
PHLDB1	PALLD	Mapk9	STAM	Dnm1l
PHLDB2	PALM	Mapkapk2	STAMBP	Dnm2
PHPT1	PALM3	Mapkapk3	STARD10	Dnm3
PHYH	PALMD	Mapre1	STARD7	Dnmbp
PHYKPL	PANK2	Mapre2	STARD9	Dnmt1
PIBF1	PANK4	Mapre3	STAT5A	Dnmt3a
PICALM	PAPOLA	Mapt	STAU1	Dnpep
PIGT	PAPOLG	Marc2	STAU2	Dnttip1
PIN1	PARD3	March5	STK38	Dnttip2
PIN4	PARG	Marcks	STK38L	Dock1
PIP4K2B	PARK7	Marcksl1	STMN1	Dock11
PITHD1	PARN	Marf1	STMN2	Dock4
PITPNA	PARP1	Mark3	STRBP	Dock5
PITPNB	PARP10	Mars	STRN	Dock6
PITRM1	PARVA	Mars2	STRN3	Dock7
pk	PARVB	Mat2a	STX12	Dock8
PKIA	PATL1	Mat2b	STX17	Dock9
PKLR	PAXBP1	Matr3	STX18	Dohh
PKM	PAXX	Mavs	STX7	Dok1
PLA2G4C	PBDC1	Mb	STXBP6	Dok7
PLAA	PBRM1	Mb21d2	SUGCT	Dolk
PLCD4	PBXIP1	Mbd3	SUGP2	Dolpp1
PLCL1	PCBP1	Mbl2	SUGT1	Dom3z
PLCL2	PCBP2	Mbnl1	SULT1A3	Dopey1
PLEC	PCDH1	Mboat7	SULT1A4	Dopey2
PLEK	PCDH12	Mbp	SUMO1	Dpagt1
PLG	PCDHGC3	Mcam	SUMO2	Dpep1
PLIN1	PCF11	Mcat	SUN1	Dpf2
PLIN2	PCGF6	Mccc1	SUPV3L1	Dph1
PLIN3	PCIF1	Mccc2	SUSD1	Dph2
PLIN4	PCM1	Mcee	SVOPL	Dph5
PLIN5	PCNT	Mcfd2	SYAP1	Dpm1
PLN	PCNX1	mCG_116534	SYCP1	Dpm3
PLPBP	PCNX3	mCG_121084	SYNE2	Dpp3
PLPP7	PCSK9	mCG_126872	SYNE3	Dpp4
PLRG1	PCYOX1	Mcm2	SYNJ2BP	Dpp7
PLS3	PCYT1A	Mcm3	SYNPR	Dpp8
PML	PDAP1	Mcm4	SYTL4	Dpp9
PMPCA	PDCD2L	Mcm5	SZRD1	Dpt
PMPCB	PDCD4	Mcm6	TAB1	Dpy19l1
PNP	PDCD5	Mcm7	TACC2	Dpy19l3
PNPO	PDE3A	Mcpt4	TACR2	Dpy19l4
PNPT1	PDE4A	Mcts1	TAF15	Dpy30
POLDIP2	PDE4C	Mcu	TAGLN3	Dpysl2
POLE3	PDE4D	Mcur1	TAMM41	Dpysl3
POLR2H	PDE4DIP	Mdga1	TANGO2	Dr1
POTEF	PDE7A	Mdh1	TAOK1	Drap1
POTEI	PDE7B	Mdh2	TAPT1	Drg1
POTEJ	PDE8A	Mdp1	TARS2	Drg2
POTEKP	PDHA1	Me1	TATDN1	Drp2
PPA1	PDHB	Me3	TATDN3	Dscr3
PPA2	PDHX	Mecp2	TAX1BP3	Dsp
PPBP	PDIA6	Mecr	TBC1D12	Dst
PPCS	PDLIM1	Mei1	TBC1D15	Dstn
PPFIA4	PDLIM2	Mek4b	TBC1D2	Dstyk
PPIA	PDLIM3	Memo1	TBC1D24	Dtd1
PPIB	PDLIM4	Mesdc2	TBC1D5	Dtna
PPID	PDLIM5	Metap1	TBCC	Dtnb
PPIF	PDLIM7	Metap1d	TBCE	Dtx2
PPIL1	PDPK1	Metap2	TBCEL	Dtx3
PPIL3	PDS5B	Mettl21c	TBL2	Dtx3l
PPM1A	PDZD8	Mettl7a1	TBRG1	Dtymk
PPM1B	PDZRN3	Mettl7a2Higd1c	TCEA3	Dupd1
PPM1F	PEA15	Mfap1	TCERG1	Dus1l
PPM1J	PEAR1	Mfap2	TCIRG1	Dus2l
PPME1	PEBP1	Mfap4	TCOF1	Dus3l
PPP1CA	PECAM1	Mfap5	TDRD15	Dus4l
PPP1CB	PELP1	Mff	TECTA	Dusp10
PPP1R12A	PEPD	Mfge8	TEK	Dusp12
PPP1R12B	PER1	Mfn1	TERF2IP	Dusp13
PPP1R14A	PERM1	Mfn2	TES	Dusp14
PPP1R14B	PEX1	mg684	TEX264	Dusp16
PPP1R14C	PEX10	Mgll	TFG	Dusp19
PPP1R1A	PEX13	Mgst1	TFIP11	Dusp22
PPP1R2	PEX19	Mgst3	TGFB1I1	Dusp23
PPP1R27	PFKFB1	Mia3	THAP4	Dusp26
PPP1R3A	PFKFB2	Micu1	THBS3	Dusp27
PPP1R7	PFKFB3	Micu3	THNSL1	Dusp28
PPP2CA	PFKL	Mief1	THNSL2	Dusp3
PPP2CB	PFKM	Mief2	THRAP3	Dut
PPP2R1A	PFN1	Mien1	THTPA	Dvl1
PPP2R2A	PFN2	Mif	THUMPD1	Dvl2
PPP2R2D	PGAM1	Minos1	THYN1	Dvl3
PPP2R3A	PGAM2	Minpp1	TIA1	Dym
PPP2R5A	PGD	Mipep	TIAL1	Dync1h1
PPP2R5D	PGK1	mKIAA0531	TIAM1	Dync1i1
PPP2R5E	PGK2	mKIAA0577	TIGAR	Dync1i2
PPP3CA	PGLS	mKIAA0890	TIGD5	Dync1li1
PPP3CB	PGM1	mKIAA0971	TIGD7	Dync1li2
PPP3R1	PGM2	mKIAA1101	TIMM10B	Dync2h1
PPP5C	PGM2L1	Mknk1	TIMM8B	Dync2li1
PPP6C	PGM3	Mkrn2	TIPRL	Dynll1;BC048507
PPP6R1	PGM5	Mlec	TJP1	Dynll2
PPP6R2	PGP	Mlf1	TKFC	Dynlrb1
PPTC7	PGRMC1	Mlf2	TLN2	Dynlt1
PRDX1	PGRMC2	Mlh3	TLR7	Dynlt3
PRDX2	PHACTR2	Mlip	TLR9	Dyrk1a
PRDX3	PHACTR4	Mllt4	TM9SF3	Dysf
PRDX4	PHB	Mlycd	TM9SF4	Dzip3
PRDX5	PHB2	Mmaa	TMCC1	E2f3
PRDX6	PHC3	Mmab	TMCO1	Ear3;Ear2
PREB	PHF12	Mmgt1	TMED1	Ears2
PRELP	PHF2	Mms19	TMED2	Ebag9
PREP	PHF3	Mob1a	TMED4	Ebf3
PRG2	PHF8	Mob2	TMEM131	Ebna1bp2
PRG3	PHKA1	Mob4	TMEM159	Ebp
PRKAA1	PHKA2	Mocs2	TMEM160	Ecd
PRKAA2	PHKB	Mocs3	TMEM182	Ece1
PRKAB2	PHKG1	Mogs	TMEM201	Ece2
PRKACA	PHLDB1	Mospd1	TMEM230	Ech1
PRKACB	PHRF1	Mp68	TMEM245	Echdc1
PRKAG1	PI4K2A	Mpc1	TMEM263	Echdc2
PRKAG2	PI4KA	Mpc2	TMEM33	Echdc3
PRKAR1A	PI4KB	Mpi	TMEM41B	Echs1
PRKAR1B	PIAS1	Mpp1	TMEM97	Eci1
PRKAR2A	PIEZO1	Mpp3	TMPO	Eci2
PRKAR2B	PIK3CA	Mpp6	TMPRSS13	Ecm1
PRKCA	PIKFYVE	Mprip	TMSB10	Ecm29;AI314180
PRKCQ	PIP4K2B	Mpst	TMTC3	Ecsit
PRKCSH	PIP4P1	Mpv17	TMUB1	Edc3
PRKDC	PIP5K1A	Mpz	TMX1	Edc4
PRKG1	PIP5K1C	Mrc1	TMX2	Edem3
PRKN	PITPNM1	Mrc2	TMX3	Edf1
PRKRA	PITPNM2	Mri1	TNC	Edil3
PRMT1	PITPNM3	Mrm1	TNKS1BP1	Edrf1
PRMT5	PIWIL3	Mrpl1	TNPO2	Eea1
PROB1	PJA1	Mrpl11	TNPO3	Eed
PRPF8	PJA2	Mrpl12	TNS2	Eef1a1
PRPS1	pk	Mrpl13	TNXA	Eef1a2
PRPS1L1	PKD1	Mrpl14	TOM1L2	Eef1b
PRPSAP1	PKM	Mrpl15	TOMM20	Eef1d
PRPSAP2	PKN1	Mrpl17	TOMM34	Eef1e1
PRRC2B	PKN2	Mrpl18	TOMM5	Eef1g
PRSS1	PKP2	Mrpl19	TOMM6	Eef2
PRSS3P2	PKP4	Mrpl2	TOMM7	Eef2k
PRTN3	PLA2G4C	Mrpl21	TOR1AIP1	Eefsec
PRUNE1	PLCB1	Mrpl22	TOR1AIP2	Eepd1
PSAP	PLCD3	Mrpl23	TP53RK	Efcab7
PSIP1	PLCD4	Mrpl24	TPD52	Efemp1
PSMA1	PLCE1	Mrpl28	TPD52L1	Efemp2
PSMA2	PLCG1	Mrpl3	TPM3	Efha1
PSMA3	PLCL1	Mrpl34	TPM4	Efha2
PSMA4	PLCL2	Mrpl35	TPPP2	Efhd2
PSMA5	PLEC	Mrpl37	TPR	Efnb1
PSMA6	PLEK	Mrpl38	TPT1P8	Efr3a
PSMA7	PLEKHA1	Mrpl39	TRA2A	Eftud1
PSMB1	PLEKHA5	Mrpl4	TRA2B	Eftud2
PSMB2	PLEKHB2	Mrpl40	TRAPPC11	Egf
PSMB3	PLEKHF1	Mrpl41	TRAPPC6B	Egflam
PSMB4	PLEKHF2	Mrpl42	TRIAP1	Egfr
PSMB5	PLEKHM2	Mrpl43	TRIM24	Egln1
PSMB6	PLEKHO2	Mrpl44	TRIM25	Ehbp1
PSMB7	PLG	Mrpl45	TRIM32	Ehbp1l1
PSMC1	PLIN1	Mrpl46	TRIM51	Ehd1
PSMC2	PLIN3	Mrpl47	TRIM55	Ehd2
PSMC3	PLIN4	Mrpl48	TRIM63	Ehd3
PSMC4	PLIN5	Mrpl49	TRIM7	Ehd4
PSMC5	PLN	Mrpl51	TRIP6	Ehhadh
PSMC6	PLPBP	Mrpl53	TRMT1	Ehmt1
PSMD1	PLPP6	Mrpl54	TRMT10C	Ehmt2
PSMD10	PLPP7	Mrpl55	TRMU	Ei24
PSMD11	PLXDC2	Mrpl57	TRPT1	Eif1;Gm6900;Eif1b
PSMD12	PLXNA1	Mrpl9	TSG101	Eif1a
PSMD13	PLXNC1	Mrps10	TSPAN8	Eif1ad
PSMD14	PML	Mrps11	TSSC1	Eif1ax
PSMD2	PNISR	Mrps12	TSTD1	Eif2a
PSMD3	PNKP	Mrps14	TTC25	Eif2ak2
PSMD4	PNN	Mrps15	TTC38	Eif2ak4
PSMD5	PNP	Mrps18b	TTC9	Eif2b1
PSMD6	PNPLA2	Mrps2	TUBB1	Eif2b2
PSMD7	PNPLA6	Mrps22	TUBB8	Eif2b3
PSMD8	PNPLA7	Mrps23	TUBG1	Eif2b4
PSMD9	PNPO	Mrps26	TWF1	Eif2b5
PSME1	POGZ	Mrps27	U2AF1	Eif2c1
PSME2	POLM	Mrps28	U2AF2	Eif2c2
PSME3	POLR1A	Mrps30	UACA	Eif2c3
PSMF1	POLR2M	Mrps31	UAP1	Eif2d
PSMG1	POLR3C	Mrps33	UBA3	Eif2s1
PTBP1	POLR3GL	Mrps34	UBA6	Eif2s2
PTCD3	POM121	Mrps35	UBAP2	Eif2s3x;Eif2s3y
PTDSS2	POPDC2	Mrps36	UBAP2L	Eif3a
PTER	POPDC3	Mrps5	UBE2D1	Eif3b
PTGES2	POTEF	Mrps6	UBE2D3	Eif3c
PTGES3	POTEKP	Mrps7	UBE2D4	Eif3d
PTGES3L-AARSD1	PPAN	Mrps9	UBE2F	Eif3e
[truncated: 5,827 more rows]
